# Supplementary material for: Genome-wide characterization and expression of the TLP gene family associated with Colletotrichum gloeosporioides inoculation in Fragaria × ananassa
Source: PeerJ journal article supplement (doi:10.7717/peerj.12979), 2022-03-24

# Kaorino-Infected/Uninfected

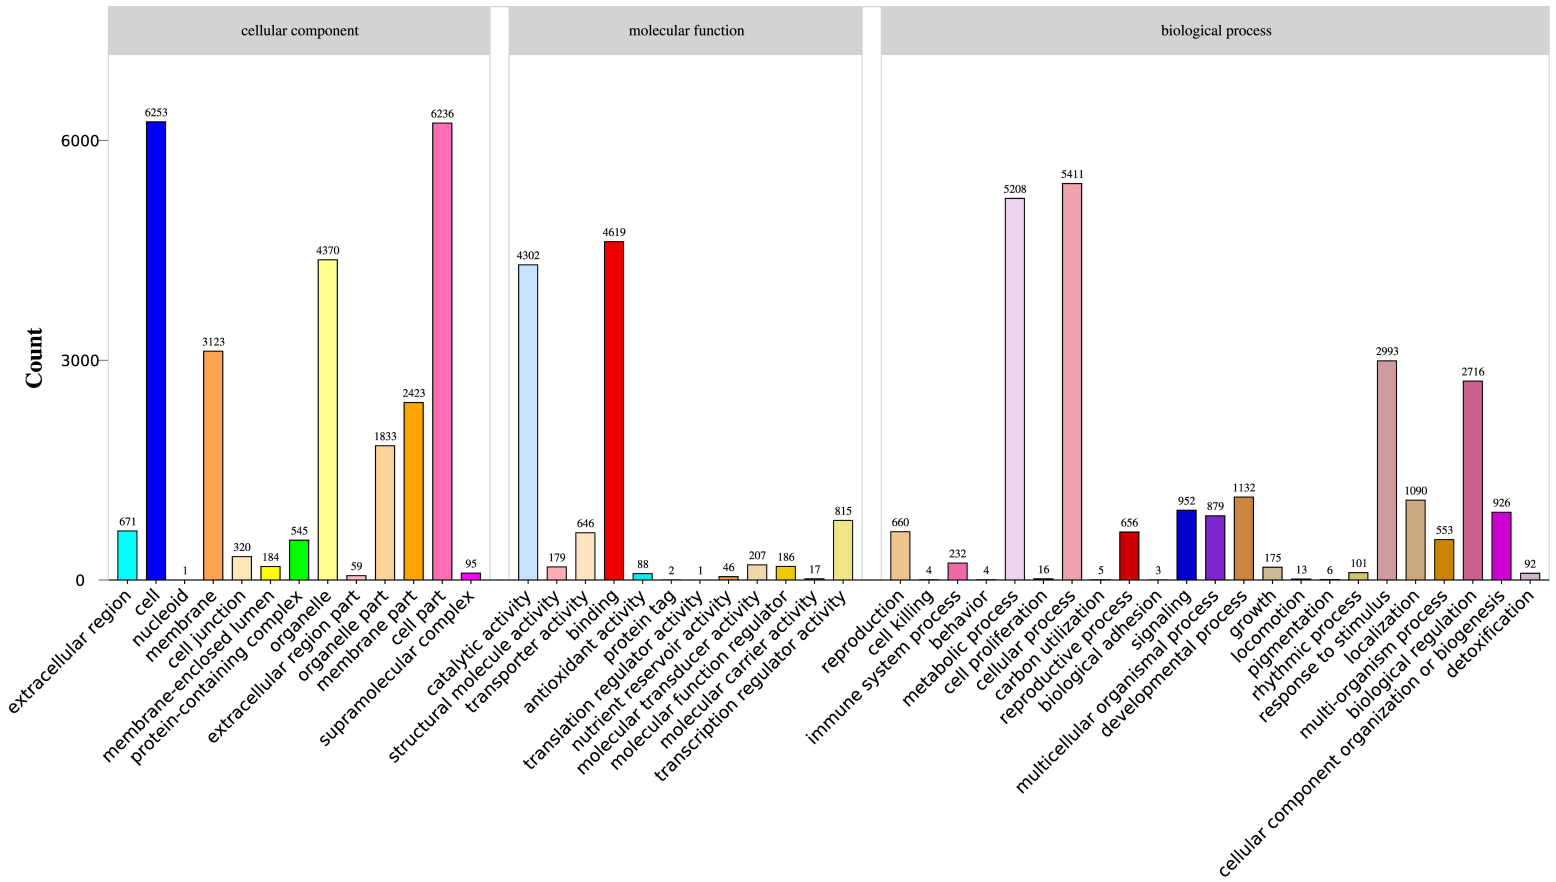

# Benihoppe-Infected/Uninfected

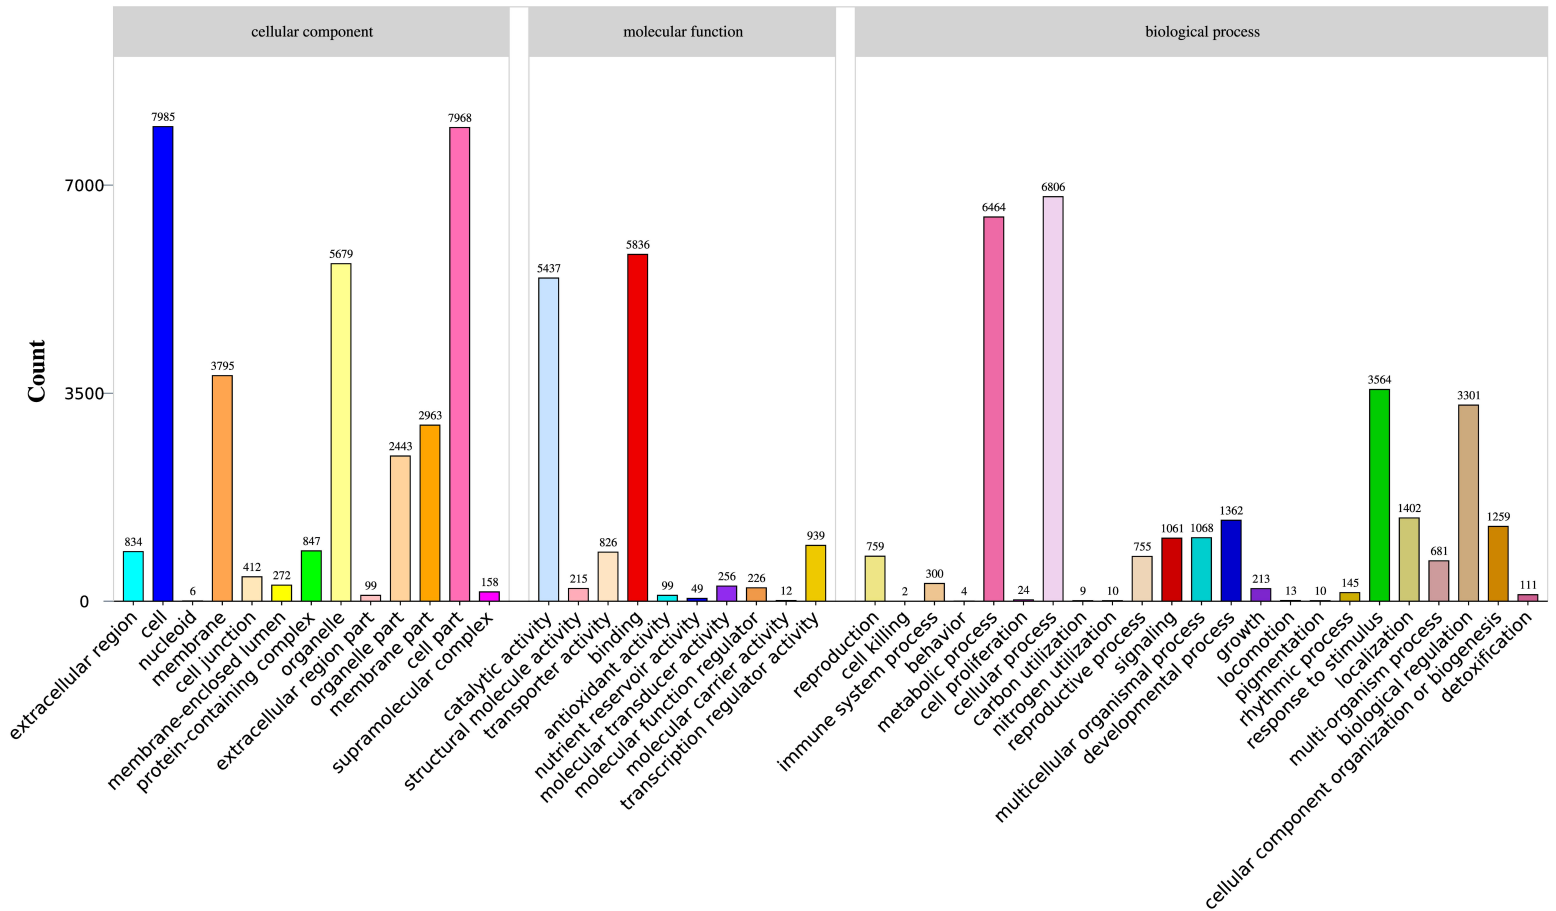

Supplement: Figure_S2.pdf [file Figure_S2.pdf]
