# Supplementary material for: Genome-wide characterization and expression of the TLP gene family associated with Colletotrichum gloeosporioides inoculation in Fragaria × ananassa
Source: PeerJ. 2022 Mar 24;10:e12979. doi: 10.7717/peerj.12979 (PMC8958966; doi:10.7717/peerj.12979)
Supplement: Supplemental Information 1 [file peerj-10-12979-s001.xlsx]

## Sheet: S1
Table S1. RNA-Seq Reads and Reads Mapping
Sample name	Kaorino-Infected1	Kaorino-Infected2	Kaorino-Infected3	Kaorino-Uninfected1	Kaorino-Uninfected2	Kaorino-Uninfected3	Benihoppe-Infected1	Benihoppe-Infected2	Benihoppe-Infected3	Benihoppe-Uninfected1	Benihoppe-Uninfected2	Benihoppe-Uninfected3
Total reads	45008114	60928122	44454392	51589342	41677612	58115934	42271240	42687700	49950926	48008768	44577324	46232824
Total mapped	41522306(92.26%)	56473293(92.69%)	41258081(92.81%)	47639909(92.34%)	38598054(92.61%)	53893782(92.73%)	38775179(91.73%)	39166202(91.75%)	45997304(92.08%)	44221375(92.11%)	41148004(92.31%)	42625472(92.20%)
Uniquely mapped	36121864（86.99%）	49053128（86.86%）	35890370（86.99%）	41564513（87.25%）	33620465（87.10%）	46962781（87.14%）	33722636（87.97%）	34112606（87.10%）	40060035（87.09%）	38499233（87.06%）	35879405（87.20%）	37009675（86.83%）
Introns	3,569,787(10.33%)	4,868,230(10.37%)	3,484,823(10.15%)	4,752,875(11.9%)	3,933,931(12.17%)	5,417,820(12%)	4,159,479(12.9%)	4,390,943(13.45%)	4,934,325(12.87%)	3,609,973(9.78%)	3,426,556(9.94%)	3,384,158(9.54%)
CDS	28,330,457(81.98%)	38,668,156(82.4%)	28,271,288(82.36%)	32,361,405(81%)	26,280,397(81.29%)	36,723,954(81.33%)	25,828,209(80.12%)	26,091,678(79.91%)	30,901,865(80.61%)	30,526,562(82.66%)	28,592,181(82.92%)	29,508,359(83.14%)
Intergenic	2,656,231(7.69%)	3,389,686(7.22%)	2,571,534(7.49%)	2,837,844(7.1%)	2,114,884(6.54%)	3,011,974(6.67%)	2,250,034(6.98%)	2,168,313(6.64%)	2,497,812(6.52%)	2,793,884(7.57%)	2,461,147(7.14%)	2,598,274(7.32%)
