# Supplementary material for: Genome-wide characterization and expression of the TLP gene family associated with Colletotrichum gloeosporioides inoculation in Fragaria × ananassa
Source: PeerJ. 2022 Mar 24;10:e12979. doi: 10.7717/peerj.12979 (PMC8958966; doi:10.7717/peerj.12979)
Supplement: Supplemental Information 2 — Based on p-adjust < 0.05, and |log2FC| > 1. [file peerj-10-12979-s002.xlsx]

## Sheet: S2
Table S2.Differentially expressed genes in Kaorino-Infected/Uninfected( |log2FC| > 1).
Gene_id	Gene description	log2(Kaorino-Infected/Uninfected)	Pvalue	Padjust	Significant	Regulated		Gene_id	Gene description	log2(Kaorino-Infected/Uninfected)	Pvalue	Padjust	Significant	Regulated
maker-Fvb1-2-snap-gene-72.37	PREDICTED: pentatricopeptide repeat-containing protein At2g17670 [Fragaria vesca subsp. vesca]	-1.57372	5.65e-10	3.67799e-09	yes	down		augustus_masked-Fvb4-1-processed-gene-189.7	PREDICTED: uncharacterized protein LOC101307982 [Fragaria vesca subsp. vesca]	3.11087	5.69373e-134	5.78837e-132	yes	up
snap_masked-Fvb5-3-processed-gene-85.15	PREDICTED: putative elongation of fatty acids protein DDB_G0272012 [Fragaria vesca subsp. vesca]	-1.72905	0.00710188	0.0183181	yes	down		augustus_masked-Fvb3-2-processed-gene-306.2	PREDICTED: transmembrane protein 45B [Fragaria vesca subsp. vesca]	1.23567	5.92642e-08	3.19975e-07	yes	up
maker-Fvb4-1-augustus-gene-92.44	hypothetical protein RchiOBHm_Chr4g0409991 [Rosa chinensis]	-1.14758	1.24e-06	5.80217e-06	yes	down		maker-Fvb2-3-augustus-gene-33.46	PREDICTED: bifunctional nuclease 1 [Fragaria vesca subsp. vesca]	1.35872	2.87966e-186	5.14482e-184	yes	up
maker-Fvb4-4-augustus-gene-12.53	PREDICTED: DEAD-box ATP-dependent RNA helicase ISE2, chloroplastic [Fragaria vesca subsp. vesca]	-1.9013	8.42e-10	5.40176e-09	yes	down		augustus_masked-Fvb4-3-processed-gene-42.14	hypothetical protein RchiOBHm_Chr4g0437271 [Rosa chinensis]	3.00774	2.8421e-09	1.7488e-08	yes	up
maker-Fvb1-1-augustus-gene-153.34	PREDICTED: phospho-2-dehydro-3-deoxyheptonate aldolase 2, chloroplastic-like [Fragaria vesca subsp. vesca]	-2.45009	2.05e-93	1.30087e-91	yes	down		augustus_masked-Fvb7-3-processed-gene-65.1	PREDICTED: nematode resistance protein-like HSPRO2 [Fragaria vesca subsp. vesca]	1.98231	1.48759e-10	1.01139e-09	yes	up
maker-Fvb5-3-snap-gene-200.61	putative transcription factor C2H2 family [Rosa chinensis]	-3.53858	0	0	yes	down		maker-Fvb2-3-snap-gene-152.40	PREDICTED: beta-ureidopropionase [Fragaria vesca subsp. vesca]	1.44026	0.015044	0.0358116	yes	up
maker-Fvb7-1-augustus-gene-204.36	transcriptional activator Myb [Fragaria vesca]	-1.65438	1.35e-07	7.04823e-07	yes	down		MSTRG.20245	PREDICTED: uncharacterized protein LOC101307378 [Fragaria vesca subsp. vesca]	1.01731	1.7557e-23	2.43318e-22	yes	up
snap_masked-Fvb6-2-processed-gene-291.28	PREDICTED: UDP-glycosyltransferase 90A1 [Fragaria vesca subsp. vesca]	-1.85559	5.34e-19	6.07271e-18	yes	down		maker-Fvb7-2-augustus-gene-127.24	PREDICTED: anthocyanidin reductase-like [Fragaria vesca subsp. vesca]	1.80035	1.53806e-20	1.88167e-19	yes	up
maker-Fvb6-2-augustus-gene-350.32	PREDICTED: DEAD-box ATP-dependent RNA helicase 53-like [Fragaria vesca subsp. vesca]	-1.43604	8.33e-51	2.54736e-49	yes	down		MSTRG.56529	PREDICTED: F-box/kelch-repeat protein At3g06240-like [Fragaria vesca subsp. vesca]	1.5174	2.05299e-06	9.3561e-06	yes	up
MSTRG.55685	PREDICTED: uncharacterized protein LOC101306935 [Fragaria vesca subsp. vesca]	-2.14699	1.28e-31	2.37145e-30	yes	down		maker-Fvb3-4-snap-gene-10.87	PREDICTED: receptor-like protein 2 [Fragaria vesca subsp. vesca]	1.06691	3.6141e-17	3.75036e-16	yes	up
MSTRG.17867	PREDICTED: protein TIC 20-v, chloroplastic [Fragaria vesca subsp. vesca]	-1.31811	2.49e-23	3.42226e-22	yes	down		maker-Fvb3-4-augustus-gene-46.35	PREDICTED: probable protein phosphatase 2C 25 [Fragaria vesca subsp. vesca]	2.95959	2.70774e-162	3.7162e-160	yes	up
maker-Fvb5-1-augustus-gene-51.45	PREDICTED: uncharacterized protein LOC101314744 [Fragaria vesca subsp. vesca]	-1.53612	5.82e-25	8.54823e-24	yes	down		maker-Fvb6-4-augustus-gene-272.34	PREDICTED: mitochondrial arginine transporter BAC2-like [Fragaria vesca subsp. vesca]	2.48418	6.07373e-10	3.94525e-09	yes	up
maker-Fvb6-1-snap-gene-324.48	PREDICTED: sucrose nonfermenting 4-like protein [Fragaria vesca subsp. vesca]	-1.15124	1.81e-22	2.40177e-21	yes	down		maker-Fvb2-4-augustus-gene-225.52	PREDICTED: uncharacterized protein LOC101303183 [Fragaria vesca subsp. vesca]	1.18422	0.00253117	0.0072054	yes	up
augustus_masked-Fvb7-1-processed-gene-320.15	PREDICTED: probable folate-biopterin transporter 7 [Fragaria vesca subsp. vesca]	-2.58073	3.19e-112	2.54134e-110	yes	down		maker-Fvb1-2-augustus-gene-13.54	PREDICTED: nudix hydrolase 8-like [Fragaria vesca subsp. vesca]	1.11141	4.09471e-15	3.80257e-14	yes	up
maker-Fvb6-2-snap-gene-351.55	PREDICTED: putative laccase-9 [Fragaria vesca subsp. vesca]	-1.25466	1.16e-10	7.9652e-10	yes	down		maker-Fvb1-2-snap-gene-232.14	PREDICTED: aspartic proteinase PCS1 [Fragaria vesca subsp. vesca]	1.11798	1.35059e-07	7.03174e-07	yes	up
maker-Fvb7-4-snap-gene-154.38	PREDICTED: protein ECERIFERUM 1-like [Fragaria vesca subsp. vesca]	-1.51661	1.01e-37	2.26121e-36	yes	down		augustus_masked-Fvb6-4-processed-gene-260.1	PREDICTED: UPF0481 protein At3g47200-like [Fragaria vesca subsp. vesca]	3.84821	0.00560551	0.014783	yes	up
maker-Fvb2-4-snap-gene-209.45	PREDICTED: acyl-protein thioesterase 2-like isoform X1 [Fragaria vesca subsp. vesca]	-1.00162	4.08e-08	2.23954e-07	yes	down		MSTRG.50600	zinc transporter 5 isoform X2 [Prunus avium]	1.14364	2.03092e-60	7.47514e-59	yes	up
MSTRG.42335	uncharacterized protein LOC112176076 [Rosa chinensis]	-1.45257	6.69e-30	1.17443e-28	yes	down		snap_masked-Fvb3-2-processed-gene-5.29	hypothetical protein RchiOBHm_Chr5g0013541 [Rosa chinensis]	2.56765	0.00957897	0.0239808	yes	up
augustus_masked-Fvb4-1-processed-gene-131.2	PREDICTED: glucuronoxylan 4-O-methyltransferase 1 isoform X1 [Fragaria vesca subsp. vesca]	-1.78181	1.05e-05	4.36631e-05	yes	down		maker-Fvb3-1-augustus-gene-224.64	PREDICTED: 60S ribosomal protein L18a-like protein [Fragaria vesca subsp. vesca]	2.50179	4.14885e-08	2.27569e-07	yes	up
maker-Fvb2-1-augustus-gene-151.59	PREDICTED: uncharacterized protein LOC101302998 isoform X1 [Fragaria vesca subsp. vesca]	-1.05758	0.0167613	0.0394138	yes	down		maker-Fvb2-3-augustus-gene-29.73	putative PPPDE putative peptidase domain-containing protein [Rosa chinensis]	1.00323	1.0388e-67	4.35024e-66	yes	up
maker-Fvb3-1-augustus-gene-6.38	PREDICTED: glucan endo-1,3-beta-glucosidase 4 [Fragaria vesca subsp. vesca]	-1.23141	2.77e-54	9.08802e-53	yes	down		MSTRG.63903	PREDICTED: L-gulonolactone oxidase-like isoform X1 [Fragaria vesca subsp. vesca]	1.92743	5.30478e-08	2.87922e-07	yes	up
maker-Fvb2-3-augustus-gene-11.46	transcription factor HY5 [Fragaria x ananassa]	-1.47513	7.79e-114	6.28969e-112	yes	down		maker-Fvb2-2-augustus-gene-204.41	PREDICTED: probable indole-3-acetic acid-amido synthetase GH3.1 [Fragaria vesca subsp. vesca]	2.10117	6.0912e-07	2.95178e-06	yes	up
maker-Fvb6-4-snap-gene-319.62	PREDICTED: uncharacterized GPI-anchored protein At4g28100 [Fragaria vesca subsp. vesca]	-1.06192	0.000435038	0.00142704	yes	down		snap_masked-Fvb1-2-processed-gene-35.45	PREDICTED: abscisate beta-glucosyltransferase-like [Fragaria vesca subsp. vesca]	1.20086	9.99564e-08	5.27785e-07	yes	up
maker-Fvb4-1-augustus-gene-184.46	PREDICTED: vacuolar iron transporter 1-like [Fragaria vesca subsp. vesca]	-2.57639	1.22e-20	1.50112e-19	yes	down		maker-Fvb2-1-snap-gene-156.39	PREDICTED: endo-1,3;1,4-beta-D-glucanase-like [Fragaria vesca subsp. vesca]	2.24694	4.19439e-15	3.89195e-14	yes	up
maker-Fvb2-4-snap-gene-16.39	PREDICTED: serine carboxypeptidase-like 18 [Fragaria vesca subsp. vesca]	-1.72305	1.73e-10	1.16867e-09	yes	down		maker-Fvb5-1-augustus-gene-272.25	PREDICTED: uncharacterized protein LOC101303619 [Fragaria vesca subsp. vesca]	1.3883	1.49474e-34	3.03782e-33	yes	up
snap_masked-Fvb5-3-processed-gene-18.21	PREDICTED: photosystem II 22 kDa protein, chloroplastic [Fragaria vesca subsp. vesca]	-1.70685	0.0139291	0.0334308	yes	down		augustus_masked-Fvb6-3-processed-gene-129.0	PREDICTED: uncharacterized protein LOC101306443 [Fragaria vesca subsp. vesca]	1.22826	2.58646e-08	1.45311e-07	yes	up
MSTRG.31369	PREDICTED: high affinity nitrate transporter 2.5-like [Fragaria vesca subsp. vesca]	-1.48371	8.23e-18	8.8139e-17	yes	down		maker-Fvb5-1-snap-gene-28.64	PREDICTED: MYB-like transcription factor ETC3 [Fragaria vesca subsp. vesca]	3.2151	0.00672214	0.0174295	yes	up
maker-Fvb6-4-augustus-gene-105.46	PREDICTED: WRKY transcription factor 44 [Fragaria vesca subsp. vesca]	-1.01114	6.22e-16	6.03581e-15	yes	down		maker-Fvb4-1-augustus-gene-102.28	PREDICTED: purple acid phosphatase 15-like [Fragaria vesca subsp. vesca]	1.99961	0.00544502	0.0144106	yes	up
maker-Fvb3-3-snap-gene-271.51	PREDICTED: THO complex subunit 3-like isoform X1 [Fragaria vesca subsp. vesca]	-4.76131	0.0129601	0.0313603	yes	down		augustus_masked-Fvb6-3-processed-gene-83.3	PREDICTED: ATP-dependent DNA helicase SRS2-like protein At4g25120 [Fragaria vesca subsp. vesca]	1.33753	9.20911e-16	8.86944e-15	yes	up
maker-Fvb2-3-augustus-gene-230.31	PREDICTED: heavy metal-associated isoprenylated plant protein 26 [Fragaria vesca subsp. vesca]	-1.38538	3.58e-26	5.52668e-25	yes	down		maker-Fvb2-3-augustus-gene-120.28	PREDICTED: aquaporin PIP2-7 [Fragaria vesca subsp. vesca]	2.90621	3.06303e-128	2.89315e-126	yes	up
maker-Fvb3-2-augustus-gene-17.31	PREDICTED: histidine kinase 2-like [Fragaria vesca subsp. vesca]	-1.21601	0.0183321	0.0426568	yes	down		augustus_masked-Fvb3-2-processed-gene-10.3	PREDICTED: phospholipase A1-Igamma1, chloroplastic [Fragaria vesca subsp. vesca]	4.31628	8.64937e-07	4.12982e-06	yes	up
maker-Fvb4-1-augustus-gene-153.43	PREDICTED: uncharacterized protein LOC101308762 [Fragaria vesca subsp. vesca]	-1.83359	5.54e-30	9.76918e-29	yes	down		augustus_masked-Fvb1-2-processed-gene-32.19	PREDICTED: transcription repressor OFP8 [Fragaria vesca subsp. vesca]	2.54094	5.38141e-35	1.10936e-33	yes	up
MSTRG.44427	PREDICTED: transcription factor TGA7-like isoform X1 [Fragaria vesca subsp. vesca]	-1.24183	6.24e-14	5.39556e-13	yes	down		maker-Fvb4-1-snap-gene-4.38	elongation factor-like GTPase 1 [Rosa chinensis]	5.78695	4.67406e-06	2.04206e-05	yes	up
snap_masked-Fvb3-3-processed-gene-139.7	PREDICTED: uncharacterized protein LOC105349931 [Fragaria vesca subsp. vesca]	-3.94727	0	0	yes	down		maker-Fvb4-3-snap-gene-150.44	putative xyloglucan:xyloglucosyl transferase, Xyloglucan-specific endo-beta-1,4-glucanase [Rosa chinensis]	4.85773	1.08815e-106	8.07913e-105	yes	up
maker-Fvb2-1-augustus-gene-194.39	PREDICTED: adenine nucleotide transporter BT1, chloroplastic/mitochondrial-like [Fragaria vesca subsp. vesca]	-1.24025	6.06e-15	5.56825e-14	yes	down		MSTRG.48354	PREDICTED: auxin-repressed 12.5 kDa protein isoform X1 [Fragaria vesca subsp. vesca]	2.38516	3.49344e-129	3.33094e-127	yes	up
maker-Fvb2-3-augustus-gene-189.29	PREDICTED: bZIP transcription factor TRAB1 [Fragaria vesca subsp. vesca]	-1.06211	1.43e-30	2.57118e-29	yes	down		MSTRG.12340	putative small auxin-up RNA [Rosa chinensis]	2.20967	2.75685e-07	1.38679e-06	yes	up
maker-Fvb3-1-augustus-gene-30.41	PREDICTED: uncharacterized protein LOC101309040 [Fragaria vesca subsp. vesca]	-2.28561	0.0218954	0.0498607	yes	down		maker-Fvb4-1-snap-gene-113.47	PREDICTED: leucine-rich repeat receptor-like serine/threonine-protein kinase At2g14510 [Fragaria vesca subsp. vesca]	1.73969	6.71223e-05	0.00025001	yes	up
augustus_masked-Fvb5-2-processed-gene-53.5	PREDICTED: RING-H2 finger protein ATL79-like [Fragaria vesca subsp. vesca]	-1.18645	0.0029323	0.00824339	yes	down		maker-Fvb5-4-augustus-gene-85.58	PREDICTED: GEM-like protein 4 [Fragaria vesca subsp. vesca]	1.05972	3.00283e-12	2.31607e-11	yes	up
augustus_masked-Fvb2-1-processed-gene-53.6	probable long-chain-alcohol O-fatty-acyltransferase 5 [Rosa chinensis]	-1.07139	0.000157339	0.000553708	yes	down		maker-Fvb4-3-augustus-gene-11.20	PREDICTED: microtubule-associated protein TORTIFOLIA1 [Fragaria vesca subsp. vesca]	2.40915	6.23438e-14	5.39366e-13	yes	up
MSTRG.33076	PREDICTED: zinc finger BED domain-containing protein RICESLEEPER 1-like [Fragaria vesca subsp. vesca]	-2.70574	0.0179928	0.0419707	yes	down		MSTRG.22273	PREDICTED: uncharacterized protein LOC105350386 [Fragaria vesca subsp. vesca]	1.77708	2.57624e-08	1.4479e-07	yes	up
maker-Fvb2-4-augustus-gene-240.28	PREDICTED: probable lactoylglutathione lyase, chloroplast [Fragaria vesca subsp. vesca]	-1.28357	5.38e-70	2.33394e-68	yes	down		MSTRG.61732	PREDICTED: glycine-rich protein A3-like [Pyrus x bretschneideri]	1.03774	4.91719e-27	7.83058e-26	yes	up
maker-Fvb5-2-snap-gene-11.58	PREDICTED: uncharacterized protein LOC101313699 isoform X1 [Fragaria vesca subsp. vesca]	-3.31352	0	0	yes	down		maker-Fvb3-1-augustus-gene-285.43	PREDICTED: xyloglucan endotransglucosylase/hydrolase 2-like [Fragaria vesca subsp. vesca]	4.07619	1.50582e-18	1.67586e-17	yes	up
snap_masked-Fvb6-3-processed-gene-313.37	PREDICTED: uncharacterized protein LOC101298344 isoform X1 [Fragaria vesca subsp. vesca]	-1.4413	4.99e-64	1.96773e-62	yes	down		snap_masked-Fvb7-2-processed-gene-0.13	PREDICTED: uncharacterized protein LOC105352787 [Fragaria vesca subsp. vesca]	4.19307	1.05148e-16	1.06884e-15	yes	up
maker-Fvb3-3-augustus-gene-95.26	PREDICTED: uncharacterized protein LOC101309135 [Fragaria vesca subsp. vesca]	-1.63697	1.88e-81	9.78974e-80	yes	down		maker-Fvb3-3-augustus-gene-94.26	basic leucine zipper 34-like [Rosa chinensis]	1.95624	1.83708e-08	1.04822e-07	yes	up
MSTRG.41255	hypothetical protein RchiOBHm_Chr6g0312951 [Rosa chinensis]	-2.31702	1.94e-15	1.83502e-14	yes	down		maker-Fvb7-3-augustus-gene-106.33	WRKY transcription factor 51 [Fragaria vesca]	1.23702	4.27456e-28	7.06688e-27	yes	up
maker-Fvb3-4-augustus-gene-210.29	PREDICTED: gibberellin 2-beta-dioxygenase 1-like [Fragaria vesca subsp. vesca]	-3.31081	9.99e-111	7.85082e-109	yes	down		maker-Fvb6-1-snap-gene-146.48	PREDICTED: E3 ubiquitin-protein ligase At1g63170 [Fragaria vesca subsp. vesca]	1.02269	3.35196e-21	4.22581e-20	yes	up
maker-Fvb5-2-augustus-gene-83.30	PREDICTED: probable arabinosyltransferase ARAD2 [Fragaria vesca subsp. vesca]	-1.62474	1.08e-27	1.75627e-26	yes	down		maker-Fvb2-4-augustus-gene-233.58	PREDICTED: uncharacterized protein LOC101297899 [Fragaria vesca subsp. vesca]	1.41372	9.41388e-19	1.05941e-17	yes	up
augustus_masked-Fvb6-4-processed-gene-111.9	extensin-like [Rosa chinensis]	-1.10419	0.000246419	0.000840807	yes	down		snap_masked-Fvb3-4-processed-gene-272.40	PREDICTED: ribulose bisphosphate carboxylase/oxygenase activase, chloroplastic-like [Fragaria vesca subsp. vesca]	1.88168	5.97354e-26	9.12306e-25	yes	up
maker-Fvb6-1-augustus-gene-273.50	PREDICTED: high-light-induced protein, chloroplastic [Fragaria vesca subsp. vesca]	-1.03729	1.48e-43	3.85804e-42	yes	down		snap_masked-Fvb6-3-processed-gene-435.31	PREDICTED: abscisic acid receptor PYL4 [Fragaria vesca subsp. vesca]	3.81369	1.33104e-34	2.71241e-33	yes	up
augustus_masked-Fvb6-1-processed-gene-51.7	PREDICTED: protein rough sheath 2 homolog [Fragaria vesca subsp. vesca]	-1.18911	1.16e-06	5.44159e-06	yes	down		maker-Fvb2-2-augustus-gene-130.25	ABA-, stress- and ripening-induced protein [Fragaria x ananassa]	2.31341	2.28982e-256	7.05489e-254	yes	up
maker-Fvb6-3-augustus-gene-284.20	PREDICTED: heat stress transcription factor A-3 [Fragaria vesca subsp. vesca]	-1.79978	6.52e-24	9.17898e-23	yes	down		snap_masked-Fvb2-3-processed-gene-30.14	PREDICTED: J domain-containing protein required for chloroplast accumulation response 1 [Fragaria vesca subsp. vesca]	1.00323	1.0388e-67	4.35024e-66	yes	up
maker-Fvb1-2-snap-gene-9.64	PREDICTED: uncharacterized protein LOC101299132 [Fragaria vesca subsp. vesca]	-1.64879	0.0138432	0.0332492	yes	down		maker-Fvb3-4-snap-gene-69.49	PREDICTED: heat stress transcription factor A-7a [Fragaria vesca subsp. vesca]	1.57386	7.17148e-23	9.68973e-22	yes	up
maker-Fvb7-1-snap-gene-266.63	PREDICTED: probable chalcone--flavonone isomerase 3 [Fragaria vesca subsp. vesca]	-3.3451	1.45e-142	1.62871e-140	yes	down		maker-Fvb3-1-augustus-gene-50.36	PREDICTED: serine/arginine-rich splicing factor SR45a isoform X1 [Fragaria vesca subsp. vesca]	2.02532	4.51578e-195	8.70306e-193	yes	up
MSTRG.59215	--	-1.60275	9.37e-05	0.000341621	yes	down		MSTRG.41447	hypothetical protein PRUPE_5G198900 [Prunus persica]	1.32476	1.60436e-14	1.43121e-13	yes	up
augustus_masked-Fvb5-1-processed-gene-185.11	uncharacterized protein LOC112176865 [Rosa chinensis]	-1.00581	4.82e-08	2.62574e-07	yes	down		maker-Fvb2-2-augustus-gene-229.37	PREDICTED: plant intracellular Ras-group-related LRR protein 9-like [Fragaria vesca subsp. vesca]	1.43827	4.36504e-05	0.000167127	yes	up
MSTRG.56859	transcription factor MYB11 [Fragaria x ananassa]	-1.83807	0.000973399	0.00300046	yes	down		augustus_masked-Fvb3-2-processed-gene-42.0	PREDICTED: uncharacterized protein LOC101296184 [Fragaria vesca subsp. vesca]	1.50933	0.00317656	0.00885996	yes	up
snap_masked-Fvb2-3-processed-gene-115.23	PREDICTED: lysine histidine transporter-like 7 [Fragaria vesca subsp. vesca]	-1.82218	6.16e-12	4.63702e-11	yes	down		maker-Fvb4-1-augustus-gene-185.34	PREDICTED: alpha,alpha-trehalose-phosphate synthase [UDP-forming] 6 [Fragaria vesca subsp. vesca]	1.31039	1.62907e-38	3.71695e-37	yes	up
augustus_masked-Fvb3-4-processed-gene-20.2	PREDICTED: uncharacterized protein LOC101295790 [Fragaria vesca subsp. vesca]	-1.63136	1.12e-07	5.87896e-07	yes	down		maker-Fvb4-3-augustus-gene-248.3	CASP-like protein 2C1 [Rosa chinensis]	1.52073	7.19751e-09	4.26814e-08	yes	up
maker-Fvb3-3-snap-gene-236.38	triosephosphate isomerase, cytosolic [Prunus persica]	-1.46368	0.00387487	0.0106164	yes	down		snap_masked-Fvb3-2-processed-gene-283.29	PREDICTED: phytoene dehydrogenase, chloroplastic/chromoplastic [Fragaria vesca subsp. vesca]	1.90328	3.422e-51	1.0536e-49	yes	up
maker-Fvb6-1-snap-gene-320.59	PREDICTED: protein ROS1-like [Fragaria vesca subsp. vesca]	-3.19834	0.00356323	0.00983892	yes	down		maker-Fvb3-4-augustus-gene-108.39	PREDICTED: uncharacterized protein LOC101299937 [Fragaria vesca subsp. vesca]	1.37075	1.3073e-45	3.56675e-44	yes	up
maker-Fvb1-1-augustus-gene-104.21	PREDICTED: uncharacterized protein LOC101309584 [Fragaria vesca subsp. vesca]	-1.20896	1e-35	2.10872e-34	yes	down		augustus_masked-Fvb1-4-processed-gene-211.1	PREDICTED: calcium-binding protein CML24-like [Fragaria vesca subsp. vesca]	1.08725	4.11491e-12	3.14091e-11	yes	up
snap_masked-Fvb4-3-processed-gene-74.18	PREDICTED: transcription factor bHLH128 isoform X1 [Fragaria vesca subsp. vesca]	-1.28525	1.1e-06	5.18302e-06	yes	down		maker-Fvb2-3-augustus-gene-13.40	PREDICTED: endoglucanase 17 [Fragaria vesca subsp. vesca]	2.77936	2.32062e-18	2.55972e-17	yes	up
maker-Fvb5-2-augustus-gene-152.11	PREDICTED: protein NUCLEAR FUSION DEFECTIVE 4-like [Fragaria vesca subsp. vesca]	-1.61444	2.73e-41	6.71104e-40	yes	down		augustus_masked-Fvb3-1-processed-gene-309.3	PREDICTED: uncharacterized protein LOC101291898 [Fragaria vesca subsp. vesca]	1.90845	1.10278e-74	5.14636e-73	yes	up
maker-Fvb7-2-augustus-gene-280.61	PREDICTED: protein TRANSPARENT TESTA 12-like [Fragaria vesca subsp. vesca]	-1.12455	2.8e-59	1.01487e-57	yes	down		maker-Fvb7-3-augustus-gene-109.46	PREDICTED: BAG family molecular chaperone regulator 6 isoform X1 [Fragaria vesca subsp. vesca]	2.20944	3.70056e-59	1.33813e-57	yes	up
maker-Fvb2-4-augustus-gene-253.46	PREDICTED: prostaglandin E synthase 2-like [Fragaria vesca subsp. vesca]	-1.11398	3e-08	1.67131e-07	yes	down		maker-Fvb3-2-augustus-gene-83.21	PREDICTED: probable potassium transporter 13 isoform X1 [Fragaria vesca subsp. vesca]	3.21491	5.3162e-67	2.19584e-65	yes	up
maker-Fvb2-1-augustus-gene-167.45	PREDICTED: indole-3-acetic acid-induced protein ARG2 [Fragaria vesca subsp. vesca]	-1.62382	2.87e-182	4.90884e-180	yes	down		maker-Fvb3-2-augustus-gene-14.55	PREDICTED: beta-galactosidase 8-like [Fragaria vesca subsp. vesca]	1.34751	2.91454e-08	1.62723e-07	yes	up
maker-Fvb1-1-snap-gene-266.72	PREDICTED: uncharacterized protein LOC101297283 [Fragaria vesca subsp. vesca]	-2.09153	7.6e-62	2.8844e-60	yes	down		maker-Fvb5-3-augustus-gene-161.50	PREDICTED: flavonol synthase 3-like [Fragaria vesca subsp. vesca]	2.00811	9.3872e-09	5.50856e-08	yes	up
MSTRG.5090	PREDICTED: putative tyrosine-protein phosphatase TPTE [Fragaria vesca subsp. vesca]	-1.67638	2.4e-28	3.99987e-27	yes	down		maker-Fvb5-2-augustus-gene-18.86	PREDICTED: potassium transporter 3 isoform X1 [Fragaria vesca subsp. vesca]	1.07846	5.66043e-07	2.75305e-06	yes	up
maker-Fvb7-1-augustus-gene-55.27	PREDICTED: 60S ribosomal protein L7a-2-like [Fragaria vesca subsp. vesca]	-1.11299	7.6e-05	0.000281025	yes	down		snap_masked-Fvb6-2-processed-gene-246.29	vitellogenin-1-like [Rosa chinensis]	2.32913	0.0206253	0.0473349	yes	up
maker-Fvb6-2-augustus-gene-205.37	PREDICTED: RNA polymerase II C-terminal domain phosphatase-like 2 [Fragaria vesca subsp. vesca]	-1.1481	2.67e-32	5.05051e-31	yes	down		maker-Fvb6-3-snap-gene-252.29	PREDICTED: uncharacterized protein LOC101306356 [Fragaria vesca subsp. vesca]	1.07382	0.00902977	0.0227446	yes	up
maker-Fvb4-2-augustus-gene-32.56	PREDICTED: uncharacterized protein LOC101293189 [Fragaria vesca subsp. vesca]	-1.32268	1.68e-195	3.28113e-193	yes	down		maker-Fvb2-1-augustus-gene-234.67	PREDICTED: D-amino-acid transaminase, chloroplastic-like [Fragaria vesca subsp. vesca]	1.24448	4.22835e-12	3.22397e-11	yes	up
augustus_masked-Fvb5-3-processed-gene-223.15	PREDICTED: WAT1-related protein At3g30340-like [Fragaria vesca subsp. vesca]	-1.33367	0.000424889	0.00139638	yes	down		maker-Fvb1-1-augustus-gene-179.33	PREDICTED: putative formamidase C869.04 isoform X2 [Fragaria vesca subsp. vesca]	1.85273	2.21025e-175	3.57512e-173	yes	up
maker-Fvb3-1-snap-gene-230.52	PREDICTED: uncharacterized protein LOC101306122 [Fragaria vesca subsp. vesca]	-1.02334	1.25e-08	7.23635e-08	yes	down		maker-Fvb7-4-augustus-gene-41.55	PREDICTED: transcription factor SCREAM2 isoform X1 [Fragaria vesca subsp. vesca]	1.89029	1.60297e-13	1.35207e-12	yes	up
augustus_masked-Fvb5-2-processed-gene-225.10	PREDICTED: isoamylase 3, chloroplastic [Fragaria vesca subsp. vesca]	-1.85718	2.32e-148	2.77057e-146	yes	down		maker-Fvb4-2-augustus-gene-86.40	PREDICTED: ATP-citrate synthase alpha chain protein 3 [Fragaria vesca subsp. vesca]	1.1293	7.88865e-56	2.67226e-54	yes	up
augustus_masked-Fvb5-2-processed-gene-231.4	PREDICTED: 14-3-3 protein 7-like [Fragaria vesca subsp. vesca]	-1.05731	1.15e-18	1.29226e-17	yes	down		augustus_masked-Fvb7-2-processed-gene-265.19	PREDICTED: 21 kDa protein-like [Fragaria vesca subsp. vesca]	2.78833	5.83845e-05	0.000219032	yes	up
maker-Fvb6-4-augustus-gene-161.11	PREDICTED: uncharacterized protein LOC101307552 [Fragaria vesca subsp. vesca]	-1.10101	8.07e-12	6.03045e-11	yes	down		augustus_masked-Fvb6-2-processed-gene-77.11	PREDICTED: F-box/LRR-repeat MAX2 homolog A [Fragaria vesca subsp. vesca]	1.68982	3.65285e-20	4.38948e-19	yes	up
maker-Fvb4-2-snap-gene-56.61	F-box/LRR-repeat protein 7-like [Rosa chinensis]	-2.95725	0.00471187	0.0126675	yes	down		MSTRG.29256	hypothetical protein PRUPE_7G228500 [Prunus persica]	1.5337	0.00520805	0.0138518	yes	up
snap_masked-Fvb5-2-processed-gene-66.20	PREDICTED: uncharacterized protein LOC105351737 isoform X2 [Fragaria vesca subsp. vesca]	-1.51518	0.00255322	0.00726065	yes	down		augustus_masked-Fvb6-1-processed-gene-168.1	PREDICTED: uncharacterized protein LOC101308787 isoform X1 [Fragaria vesca subsp. vesca]	1.34069	0.00738966	0.0189853	yes	up
maker-Fvb7-2-augustus-gene-125.47	PREDICTED: putative glucose-6-phosphate 1-epimerase isoform X1 [Fragaria vesca subsp. vesca]	-1.2925	2.11e-08	1.19539e-07	yes	down		MSTRG.59222	PREDICTED: LOW QUALITY PROTEIN: uncharacterized protein LOC101304315 [Fragaria vesca subsp. vesca]	2.33213	0.0126133	0.03062	yes	up
maker-Fvb5-1-snap-gene-206.49	PREDICTED: F-box protein At1g47056-like [Fragaria vesca subsp. vesca]	-2.07567	0	0	yes	down		augustus_masked-Fvb6-2-processed-gene-286.7	PREDICTED: uncharacterized protein LOC101305399 [Fragaria vesca subsp. vesca]	3.05423	0.000262934	0.000893253	yes	up
augustus_masked-Fvb5-2-processed-gene-73.9	PREDICTED: uncharacterized protein LOC105351506 [Fragaria vesca subsp. vesca]	-1.43076	0.000433295	0.00142209	yes	down		maker-Fvb7-2-snap-gene-204.55	PREDICTED: NAC domain-containing protein 4-like isoform X1 [Fragaria vesca subsp. vesca]	2.2104	0.00154636	0.00458704	yes	up
maker-Fvb3-4-augustus-gene-246.49	PREDICTED: squamosa promoter-binding-like protein 3 [Fragaria vesca subsp. vesca]	-1.25017	3.51e-14	3.08046e-13	yes	down		augustus_masked-Fvb2-1-processed-gene-24.5	PREDICTED: transcription factor MYB44-like [Fragaria vesca subsp. vesca]	4.63723	6.38336e-10	4.13599e-09	yes	up
MSTRG.42720	putative transcription factor C2H2 family [Rosa chinensis]	-1.95401	0.00333878	0.00926874	yes	down		MSTRG.23843	hypothetical protein RchiOBHm_Chr1g0379961 [Rosa chinensis]	1.56043	3.37928e-25	5.00242e-24	yes	up
maker-Fvb7-2-augustus-gene-274.62	PREDICTED: low-temperature-induced 65 kDa protein isoform X7 [Fragaria vesca subsp. vesca]	-5.45343	1.76e-20	2.14677e-19	yes	down		augustus_masked-Fvb6-2-processed-gene-39.4	PREDICTED: chlorophyll a-b binding protein of LHCII type 1-like [Fragaria vesca subsp. vesca]	4.77895	1.31483e-23	1.8306e-22	yes	up
augustus_masked-Fvb2-1-processed-gene-263.10	PREDICTED: uncharacterized protein LOC101299831 [Fragaria vesca subsp. vesca]	-4.35754	0.00531525	0.0141038	yes	down		snap_masked-Fvb1-4-processed-gene-130.21	PREDICTED: uncharacterized protein LOC101295168 isoform X2 [Fragaria vesca subsp. vesca]	4.96997	9.48002e-07	4.50435e-06	yes	up
maker-Fvb2-3-snap-gene-37.75	PREDICTED: protein RCC2 homolog [Fragaria vesca subsp. vesca]	-1.24466	3.9e-19	4.46963e-18	yes	down		maker-Fvb6-3-augustus-gene-421.35	PREDICTED: NAC domain-containing protein 74-like [Fragaria vesca subsp. vesca]	1.43702	6.1783e-08	3.33137e-07	yes	up
MSTRG.52736	PREDICTED: protein FAR1-RELATED SEQUENCE 3-like [Fragaria vesca subsp. vesca]	-2.09024	1.41e-71	6.27167e-70	yes	down		maker-Fvb2-3-snap-gene-156.43	uncharacterized protein LOC110746202 [Prunus avium]	1.87883	8.5656e-08	4.55382e-07	yes	up
maker-Fvb7-1-snap-gene-279.69	PREDICTED: uncharacterized protein LOC101292352 [Fragaria vesca subsp. vesca]	-1.13644	1.26e-05	5.17261e-05	yes	down		maker-Fvb6-3-augustus-gene-347.43	PREDICTED: uncharacterized protein LOC101312742 [Fragaria vesca subsp. vesca]	1.60388	4.54963e-25	6.7108e-24	yes	up
maker-Fvb4-3-augustus-gene-114.43	PREDICTED: uncharacterized protein LOC101300714 [Fragaria vesca subsp. vesca]	-1.57613	3.79e-08	2.08974e-07	yes	down		augustus_masked-Fvb6-2-processed-gene-227.15	PREDICTED: pentatricopeptide repeat-containing protein At1g63330-like [Fragaria vesca subsp. vesca]	1.22925	0.018939	0.0439154	yes	up
maker-Fvb1-2-snap-gene-22.60	PREDICTED: uncharacterized protein LOC101291956 [Fragaria vesca subsp. vesca]	-2.43933	1.83e-14	1.63206e-13	yes	down		maker-Fvb7-1-snap-gene-270.81	PREDICTED: metacaspase-1-like [Fragaria vesca subsp. vesca]	2.51678	0.00152246	0.00452403	yes	up
maker-Fvb2-1-snap-gene-56.44	PREDICTED: probable DNA helicase MCM9 [Fragaria vesca subsp. vesca]	-2.86502	3.59e-118	3.06076e-116	yes	down		maker-Fvb3-3-augustus-gene-33.44	linoleate 13S-lipoxygenase 3-1, chloroplastic-like isoform X1 [Rosa chinensis]	1.98318	6.82931e-09	4.06043e-08	yes	up
maker-Fvb2-2-augustus-gene-110.43	PREDICTED: uncharacterized protein LOC101310567 [Fragaria vesca subsp. vesca]	-1.27672	9.53e-15	8.64745e-14	yes	down		augustus_masked-Fvb6-2-processed-gene-150.4	PREDICTED: uncharacterized protein LOC101291844 [Fragaria vesca subsp. vesca]	1.15898	5.72894e-06	2.47559e-05	yes	up
maker-Fvb3-2-augustus-gene-197.28	nudix hydrolase 10-like isoform X1 [Rosa chinensis]	-1.69617	1.32e-119	1.1528e-117	yes	down		augustus_masked-Fvb6-2-processed-gene-327.4	PREDICTED: G-type lectin S-receptor-like serine/threonine-protein kinase At4g03230 isoform X3 [Fragaria vesca subsp. vesca]	1.00374	9.07804e-27	1.43083e-25	yes	up
maker-Fvb6-1-snap-gene-293.79	PREDICTED: lactosylceramide 4-alpha-galactosyltransferase-like [Fragaria vesca subsp. vesca]	-1.45077	2.35e-93	1.48814e-91	yes	down		maker-Fvb1-1-augustus-gene-105.22	PREDICTED: probable glycosyltransferase At5g03795 [Fragaria vesca subsp. vesca]	1.01508	3.78225e-27	6.04232e-26	yes	up
maker-Fvb2-3-snap-gene-68.78	PREDICTED: uncharacterized protein LOC101302032 [Fragaria vesca subsp. vesca]	-1.0812	8.46e-26	1.28303e-24	yes	down		maker-Fvb6-3-augustus-gene-162.42	PREDICTED: chaperone protein dnaJ 8, chloroplastic isoform X2 [Fragaria vesca subsp. vesca]	1.36292	3.09144e-30	5.4821e-29	yes	up
maker-Fvb4-2-snap-gene-50.70	PREDICTED: amino-acid permease BAT1 homolog isoform X2 [Fragaria vesca subsp. vesca]	-1.16709	8.55e-22	1.10344e-20	yes	down		maker-Fvb2-2-augustus-gene-17.53	PREDICTED: trihelix transcription factor GT-2-like [Fragaria vesca subsp. vesca]	1.45325	0.00151065	0.00449204	yes	up
maker-Fvb7-2-augustus-gene-70.38	uncharacterized protein LOC112189879 isoform X1 [Rosa chinensis]	-1.0844	3.23e-12	2.48642e-11	yes	down		snap_masked-Fvb6-4-processed-gene-298.31	PREDICTED: pyruvate kinase isozyme A, chloroplastic [Fragaria vesca subsp. vesca]	1.16573	5.4791e-69	2.3488e-67	yes	up
augustus_masked-Fvb7-2-processed-gene-140.3	PREDICTED: ras-related protein RABC2a-like [Fragaria vesca subsp. vesca]	-3.13741	6.05e-30	1.06534e-28	yes	down		augustus_masked-Fvb6-1-processed-gene-256.13	PREDICTED: uncharacterized protein LOC101312271 [Fragaria vesca subsp. vesca]	5.47724	0.000373879	0.00123998	yes	up
maker-Fvb5-2-augustus-gene-2.48	PREDICTED: uncharacterized protein LOC101294262 [Fragaria vesca subsp. vesca]	-1.26639	2.02e-67	8.42276e-66	yes	down		MSTRG.19616	PREDICTED: stem-specific protein TSJT1-like [Fragaria vesca subsp. vesca]	2.57074	6.7406e-23	9.11708e-22	yes	up
MSTRG.14380	PREDICTED: bZIP transcription factor TRAB1 [Fragaria vesca subsp. vesca]	-1.06211	1.43e-30	2.57118e-29	yes	down		maker-Fvb1-1-snap-gene-118.44	PREDICTED: probable polygalacturonase [Fragaria vesca subsp. vesca]	1.03693	8.22229e-28	1.34389e-26	yes	up
augustus_masked-Fvb7-2-processed-gene-206.6	PREDICTED: ras-related protein RABC2a-like [Fragaria vesca subsp. vesca]	-1.80782	0.00731508	0.0188161	yes	down		augustus_masked-Fvb2-2-processed-gene-222.6	PREDICTED: chaperone protein dnaJ 11, chloroplastic-like [Fragaria vesca subsp. vesca]	7.52487	3.32467e-21	4.19198e-20	yes	up
maker-Fvb7-4-augustus-gene-39.52	PREDICTED: glycerol-3-phosphate dehydrogenase [NAD(+)] 2, chloroplastic [Fragaria vesca subsp. vesca]	-1.13949	9.17e-41	2.22088e-39	yes	down		augustus_masked-Fvb4-4-processed-gene-12.18	PREDICTED: uncharacterized protein LOC105351248 [Fragaria vesca subsp. vesca]	4.15941	1.10972e-14	1.00381e-13	yes	up
maker-Fvb3-4-augustus-gene-268.49	PREDICTED: CBS domain-containing protein CBSX5-like [Fragaria vesca subsp. vesca]	-1.30748	3.72e-16	3.65545e-15	yes	down		MSTRG.2665	PREDICTED: auxin-binding protein ABP19a-like [Fragaria vesca subsp. vesca]	2.63916	1.58641e-06	7.33492e-06	yes	up
MSTRG.35968	PREDICTED: S-adenosylmethionine carrier 1, chloroplastic/mitochondrial [Fragaria vesca subsp. vesca]	-1.43139	3.66e-08	2.02303e-07	yes	down		maker-Fvb6-1-augustus-gene-310.45	PREDICTED: protein LURP-one-related 5-like [Fragaria vesca subsp. vesca]	1.75307	2.52357e-07	1.27489e-06	yes	up
maker-Fvb5-3-augustus-gene-232.45	PREDICTED: squamosa promoter-binding-like protein 13A [Fragaria vesca subsp. vesca]	-1.77209	8.79e-93	5.46239e-91	yes	down		augustus_masked-Fvb1-3-processed-gene-17.11	PREDICTED: uncharacterized protein At1g15400-like [Fragaria vesca subsp. vesca]	1.9245	3.29346e-24	4.70544e-23	yes	up
snap_masked-Fvb2-1-processed-gene-190.26	lipid transfer protein EARLI 1-like [Rosa chinensis]	-1.09759	2.61e-50	7.87149e-49	yes	down		maker-Fvb3-1-augustus-gene-299.41	PREDICTED: F-box protein SKIP27 [Fragaria vesca subsp. vesca]	2.15956	0.010902	0.0268996	yes	up
snap_masked-Fvb1-2-processed-gene-47.28	PREDICTED: cysteine-rich receptor-like protein kinase 7 [Fragaria vesca subsp. vesca]	-1.8717	2.75e-40	6.60344e-39	yes	down		snap_masked-Fvb4-3-processed-gene-135.24	PREDICTED: bifunctional epoxide hydrolase 2-like isoform X2 [Fragaria vesca subsp. vesca]	1.31903	6.18628e-20	7.34513e-19	yes	up
augustus_masked-Fvb7-2-processed-gene-251.15	PREDICTED: uncharacterized protein LOC105353083 [Fragaria vesca subsp. vesca]	-2.53193	2.16e-12	1.68024e-11	yes	down		maker-Fvb4-3-augustus-gene-149.30	PREDICTED: peptidyl-prolyl cis-trans isomerase FKBP62-like [Fragaria vesca subsp. vesca]	2.82644	4.71079e-295	1.77795e-292	yes	up
maker-Fvb7-2-augustus-gene-233.62	PREDICTED: glycine-rich protein A3-like [Fragaria vesca subsp. vesca]	-1.49429	9.97e-101	6.91285e-99	yes	down		augustus_masked-Fvb3-2-processed-gene-176.6	PREDICTED: uncharacterized protein LOC105350703 [Fragaria vesca subsp. vesca]	3.42037	3.08255e-51	9.50053e-50	yes	up
augustus_masked-Fvb3-2-processed-gene-241.3	PREDICTED: zinc finger protein CONSTANS-LIKE 1 isoform X1 [Fragaria vesca subsp. vesca]	-2.40201	0.0133467	0.0321787	yes	down		snap_masked-Fvb5-3-processed-gene-106.22	PREDICTED: uncharacterized protein LOC101300149 isoform X1 [Fragaria vesca subsp. vesca]	1.17074	6.53416e-63	2.53913e-61	yes	up
augustus_masked-Fvb7-1-processed-gene-147.1	PREDICTED: transcription factor UNE10 [Fragaria vesca subsp. vesca]	-1.25808	7.48e-53	2.37565e-51	yes	down		maker-Fvb5-2-augustus-gene-31.58	PREDICTED: probable alpha,alpha-trehalose-phosphate synthase [UDP-forming] 9 [Fragaria vesca subsp. vesca]	1.07207	5.04385e-33	9.73322e-32	yes	up
snap_masked-Fvb4-4-processed-gene-155.18	PREDICTED: 15-cis-zeta-carotene isomerase, chloroplastic [Fragaria vesca subsp. vesca]	-1.37941	7.06e-50	2.11881e-48	yes	down		snap_masked-Fvb6-2-processed-gene-279.37	PREDICTED: protection of telomeres protein 1a-like [Fragaria vesca subsp. vesca]	1.18992	0.00111493	0.00339799	yes	up
maker-Fvb2-2-augustus-gene-225.49	PREDICTED: heavy metal-associated isoprenylated plant protein 26 [Fragaria vesca subsp. vesca]	-1.15417	6.62e-39	1.53151e-37	yes	down		augustus_masked-Fvb3-2-processed-gene-191.9	PREDICTED: probable carboxylesterase 18 [Fragaria vesca subsp. vesca]	1.38158	2.65484e-11	1.91311e-10	yes	up
maker-Fvb3-1-augustus-gene-266.26	PREDICTED: homeobox-leucine zipper protein ATHB-14 [Fragaria vesca subsp. vesca]	-1.24898	1.11e-09	7.08854e-09	yes	down		MSTRG.33115	PREDICTED: protein indeterminate-domain 4, chloroplastic-like [Fragaria vesca subsp. vesca]	1.01726	7.25922e-48	2.08679e-46	yes	up
snap_masked-Fvb2-4-processed-gene-261.41	PREDICTED: elongation of fatty acids protein 3-like [Fragaria vesca subsp. vesca]	-1.95142	1.98e-06	9.02651e-06	yes	down		maker-Fvb3-2-augustus-gene-63.39	PREDICTED: uncharacterized protein LOC101307378 [Fragaria vesca subsp. vesca]	1.01731	1.7557e-23	2.43318e-22	yes	up
augustus_masked-Fvb5-1-processed-gene-130.17	PREDICTED: LRR receptor-like serine/threonine-protein kinase EFR [Fragaria vesca subsp. vesca]	-2.73649	7.12e-09	4.22429e-08	yes	down		maker-Fvb1-1-snap-gene-265.73	PREDICTED: uncharacterized protein LOC101298453 [Fragaria vesca subsp. vesca]	1.37658	5.30719e-08	2.88001e-07	yes	up
maker-Fvb2-1-augustus-gene-48.30	TMV resistance protein N-like isoform X2 [Rosa chinensis]	-2.82981	0.00064508	0.00205349	yes	down		maker-Fvb5-1-augustus-gene-52.57	PREDICTED: alpha-mannosidase-like [Fragaria vesca subsp. vesca]	1.58681	6.00258e-26	9.16432e-25	yes	up
snap_masked-Fvb5-2-processed-gene-113.30	PREDICTED: UPF0676 protein C1494.01-like [Fragaria vesca subsp. vesca]	-1.3234	1.22e-76	5.87529e-75	yes	down		snap_masked-Fvb2-1-processed-gene-110.22	PREDICTED: putative disease resistance protein RGA4 [Fragaria vesca subsp. vesca]	1.33622	3.92674e-08	2.15948e-07	yes	up
maker-Fvb3-2-snap-gene-13.38	PREDICTED: protein STRUBBELIG-RECEPTOR FAMILY 3 [Fragaria vesca subsp. vesca]	-2.76256	0.00388445	0.0106411	yes	down		snap_masked-Fvb4-4-processed-gene-250.12	PREDICTED: F-box protein At5g07610-like [Fragaria vesca subsp. vesca]	2.30912	1.18574e-11	8.76564e-11	yes	up
maker-Fvb4-1-snap-gene-189.74	PREDICTED: uncharacterized protein LOC101307297 isoform X2 [Fragaria vesca subsp. vesca]	-1.05326	1.48e-08	8.53981e-08	yes	down		maker-Fvb3-1-augustus-gene-165.27	PREDICTED: 65-kDa microtubule-associated protein 1 [Fragaria vesca subsp. vesca]	1.04733	1.18187e-15	1.13106e-14	yes	up
maker-Fvb6-2-snap-gene-193.43	PREDICTED: cyclic nucleotide-gated ion channel 1-like isoform X1 [Fragaria vesca subsp. vesca]	-3.84171	0.00824237	0.0209578	yes	down		MSTRG.10238	putative RNA-directed DNA polymerase [Rosa chinensis]	1.79146	0.000348483	0.0011609	yes	up
MSTRG.61700	PREDICTED: probable dimethyladenosine transferase isoform X1 [Fragaria vesca subsp. vesca]	-1.14762	1.65e-22	2.19132e-21	yes	down		augustus_masked-Fvb7-2-processed-gene-205.5	PREDICTED: transcription initiation factor IIB-2 [Fragaria vesca subsp. vesca]	2.8067	0.00311379	0.00870285	yes	up
maker-Fvb3-4-snap-gene-28.82	PREDICTED: uncharacterized protein LOC101301766 [Fragaria vesca subsp. vesca]	-1.2769	1.34e-09	8.50151e-09	yes	down		augustus_masked-Fvb5-4-processed-gene-17.2	putative Late embryogenesis abundant protein, LEA-14 [Rosa chinensis]	5.766	0.00027774	0.000939782	yes	up
maker-Fvb4-2-augustus-gene-65.61	PREDICTED: uncharacterized protein LOC101315017 [Fragaria vesca subsp. vesca]	-1.47745	1.81e-06	8.31051e-06	yes	down		maker-Fvb5-4-augustus-gene-85.61	PREDICTED: probable metal-nicotianamine transporter YSL7 [Fragaria vesca subsp. vesca]	1.25695	8.68424e-80	4.36772e-78	yes	up
maker-Fvb6-1-snap-gene-136.44	PREDICTED: ABC transporter G family member 29 [Fragaria vesca subsp. vesca]	-1.39005	1.36e-16	1.37446e-15	yes	down		maker-Fvb7-1-augustus-gene-280.53	PREDICTED: cytochrome P450 704C1-like [Fragaria vesca subsp. vesca]	4.6208	0.002445	0.00698359	yes	up
maker-Fvb1-3-augustus-gene-70.17	PREDICTED: dehydrin Xero 2 [Fragaria vesca subsp. vesca]	-2.36175	1.22e-28	2.04846e-27	yes	down		snap_masked-Fvb3-1-processed-gene-249.20	PREDICTED: pentatricopeptide repeat-containing protein At4g20090 [Fragaria vesca subsp. vesca]	1.86108	2.48768e-62	9.53603e-61	yes	up
maker-Fvb4-2-snap-gene-81.70	PREDICTED: heparan-alpha-glucosaminide N-acetyltransferase-like [Fragaria vesca subsp. vesca]	-1.1689	0.0120502	0.0293916	yes	down		maker-Fvb6-4-snap-gene-36.70	PREDICTED: light-inducible protein CPRF2 [Fragaria vesca subsp. vesca]	3.02731	0.011158	0.0274595	yes	up
augustus_masked-Fvb4-3-processed-gene-189.1	PREDICTED: E3 ubiquitin-protein ligase Topors isoform X3 [Fragaria vesca subsp. vesca]	-1.7264	0.00476212	0.012784	yes	down		maker-Fvb3-4-snap-gene-127.41	PREDICTED: secoisolariciresinol dehydrogenase-like [Fragaria vesca subsp. vesca]	5.16951	0.00293597	0.00825269	yes	up
maker-Fvb2-4-augustus-gene-28.30	RecName: Full=Putative UDP-glucose glucosyltransferase; Short=FaGT5; AltName: Full=Glucosyltransferase 5	-1.05596	2.29e-28	3.81433e-27	yes	down		snap_masked-Fvb6-4-processed-gene-341.56	PREDICTED: ribonucleoside-diphosphate reductase small chain [Fragaria vesca subsp. vesca]	1.55631	0.0106991	0.0264507	yes	up
maker-Fvb1-4-snap-gene-94.58	PREDICTED: growth-regulating factor 1-like [Fragaria vesca subsp. vesca]	-1.28162	0.021344	0.048751	yes	down		augustus_masked-Fvb4-3-processed-gene-74.4	PREDICTED: LOW QUALITY PROTEIN: DEAD-box ATP-dependent RNA helicase 42-like [Fragaria vesca subsp. vesca]	1.66475	0.00786916	0.0201031	yes	up
MSTRG.29069	PREDICTED: probable disease resistance protein At4g27220 isoform X4 [Fragaria vesca subsp. vesca]	-4.46759	0.000406205	0.00133964	yes	down		snap_masked-Fvb7-1-processed-gene-61.21	PREDICTED: myosin heavy chain, embryonic smooth muscle isoform-like [Fragaria vesca subsp. vesca]	4.4867	0.00571843	0.0150523	yes	up
maker-Fvb2-4-augustus-gene-47.27	PREDICTED: plastid division protein PDV2-like [Fragaria vesca subsp. vesca]	-1.0511	1.22e-23	1.69531e-22	yes	down		MSTRG.28304	--	4.02659	4.90479e-22	6.38885e-21	yes	up
maker-Fvb2-3-augustus-gene-99.34	PREDICTED: uncharacterized protein LOC101311719 [Fragaria vesca subsp. vesca]	-2.36051	1.28e-50	3.88351e-49	yes	down		snap_masked-Fvb6-1-processed-gene-12.21	PREDICTED: calcium-binding protein CML38 [Fragaria vesca subsp. vesca]	3.76546	0.00234212	0.00671612	yes	up
snap_masked-Fvb5-1-processed-gene-275.31	PREDICTED: (-)-isopiperitenol/(-)-carveol dehydrogenase, mitochondrial-like [Fragaria vesca subsp. vesca]	-1.20061	3.52e-17	3.65627e-16	yes	down		maker-Fvb4-3-augustus-gene-168.36	PREDICTED: leucine-rich repeat receptor-like serine/threonine-protein kinase At2g14510 [Fragaria vesca subsp. vesca]	1.1268	1.22724e-07	6.41792e-07	yes	up
maker-Fvb1-1-snap-gene-152.31	PREDICTED: 7-deoxyloganetin glucosyltransferase-like [Fragaria vesca subsp. vesca]	-1.30133	2.91e-05	0.000114326	yes	down		augustus_masked-Fvb4-1-processed-gene-63.6	PREDICTED: probable mitochondrial chaperone BCS1-B [Fragaria vesca subsp. vesca]	1.71229	0.00548324	0.0145007	yes	up
augustus_masked-Fvb2-4-processed-gene-209.3	PREDICTED: G-type lectin S-receptor-like serine/threonine-protein kinase B120 isoform X2 [Fragaria vesca subsp. vesca]	-1.28734	2.02e-87	1.16262e-85	yes	down		maker-Fvb4-3-augustus-gene-60.40	PREDICTED: extensin-2-like, partial [Fragaria vesca subsp. vesca]	1.29005	9.42119e-09	5.52779e-08	yes	up
maker-Fvb1-2-snap-gene-112.40	protein DMR6-LIKE OXYGENASE 2-like [Rosa chinensis]	-1.0552	3.32e-52	1.04221e-50	yes	down		maker-Fvb2-3-augustus-gene-134.22	trihelix transcription factor GT-2B [Fragaria x ananassa]	1.08897	6.39297e-23	8.65592e-22	yes	up
maker-Fvb5-1-snap-gene-59.61	hypothetical protein PRUPE_5G125600 [Prunus persica]	-2.65816	3.5e-52	1.09802e-50	yes	down		maker-Fvb7-2-augustus-gene-189.43	PREDICTED: probable inactive 2-oxoglutarate-dependent dioxygenase AOP2 [Fragaria vesca subsp. vesca]	4.92708	2.22848e-05	8.8936e-05	yes	up
snap_masked-Fvb7-4-processed-gene-100.19	PREDICTED: DEAD-box ATP-dependent RNA helicase 31-like [Fragaria vesca subsp. vesca]	-1.58825	7.55e-107	5.61701e-105	yes	down		maker-Fvb5-1-augustus-gene-185.49	PREDICTED: uncharacterized protein At1g76660 [Fragaria vesca subsp. vesca]	1.10347	0.000264133	0.000897023	yes	up
maker-Fvb4-4-augustus-gene-67.58	PREDICTED: uncharacterized protein LOC101297695 [Fragaria vesca subsp. vesca]	-1.31183	8.01e-54	2.60146e-52	yes	down		snap_masked-Fvb7-3-processed-gene-101.17	PREDICTED: uncharacterized protein LOC101307620 [Fragaria vesca subsp. vesca]	1.8992	1.16568e-16	1.18147e-15	yes	up
maker-Fvb5-1-snap-gene-162.43	PREDICTED: mediator of RNA polymerase II transcription subunit 34 isoform X4 [Fragaria vesca subsp. vesca]	-1.02832	1.2e-15	1.14724e-14	yes	down		maker-Fvb1-4-snap-gene-153.32	PREDICTED: diphthamide biosynthesis protein 3-like [Fragaria vesca subsp. vesca]	1.41217	0.00128927	0.0038836	yes	up
MSTRG.4180	PREDICTED: chitotriosidase-1-like [Fragaria vesca subsp. vesca]	-2.13383	7.43e-50	2.22648e-48	yes	down		augustus_masked-Fvb2-4-processed-gene-251.3	PREDICTED: auxin-induced protein 15A [Fragaria vesca subsp. vesca]	1.14003	0.000286199	0.000966384	yes	up
maker-Fvb2-1-augustus-gene-98.27	PREDICTED: uncharacterized protein ycf39 [Fragaria vesca subsp. vesca]	-1.2452	1.49e-82	7.91611e-81	yes	down		maker-Fvb2-1-augustus-gene-240.39	PREDICTED: 3-ketoacyl-CoA synthase 10 [Fragaria vesca subsp. vesca]	1.05579	2.77915e-38	6.31555e-37	yes	up
augustus_masked-Fvb3-3-processed-gene-241.2	PREDICTED: transcription factor PCL1 [Fragaria vesca subsp. vesca]	-3.85935	3.59e-109	2.75924e-107	yes	down		augustus_masked-Fvb7-3-processed-gene-105.10	PREDICTED: pentatricopeptide repeat-containing protein At4g01030, mitochondrial [Fragaria vesca subsp. vesca]	1.16422	0.000966398	0.0029802	yes	up
maker-Fvb2-2-augustus-gene-196.36	rac-like GTP-binding protein ARAC7 [Rosa chinensis]	-1.08834	0.00790364	0.0201849	yes	down		augustus_masked-Fvb7-1-processed-gene-227.0	PREDICTED: CBL-interacting serine/threonine-protein kinase 9 [Fragaria vesca subsp. vesca]	1.69634	4.77366e-40	1.1385e-38	yes	up
maker-Fvb7-4-augustus-gene-16.50	PREDICTED: ABC transporter C family member 10-like [Fragaria vesca subsp. vesca]	-1.38011	1.28e-57	4.49459e-56	yes	down		MSTRG.52130	PREDICTED: wall-associated receptor kinase-like 9 [Fragaria vesca subsp. vesca]	3.01037	0.00158545	0.00469474	yes	up
maker-Fvb7-1-augustus-gene-305.38	PREDICTED: protein TRANSPARENT TESTA 12-like [Fragaria vesca subsp. vesca]	-1.14708	2.16e-30	3.86547e-29	yes	down		MSTRG.56448	PREDICTED: uncharacterized protein LOC101297459 [Fragaria vesca subsp. vesca]	5.08235	0.0083702	0.0212483	yes	up
maker-Fvb4-3-augustus-gene-35.47	PREDICTED: uncharacterized protein LOC101297534 [Fragaria vesca subsp. vesca]	-3.71686	2.68e-08	1.50238e-07	yes	down		augustus_masked-Fvb5-1-processed-gene-19.5	uncharacterized protein LOC112177456 [Rosa chinensis]	1.57119	1.8339e-06	8.41777e-06	yes	up
maker-Fvb5-3-augustus-gene-176.37	PREDICTED: kinase-interacting family protein isoform X1 [Fragaria vesca subsp. vesca]	-3.1696	6.56e-24	9.23796e-23	yes	down		augustus_masked-Fvb6-3-processed-gene-49.13	PREDICTED: vicilin-like antimicrobial peptides 2-2 [Fragaria vesca subsp. vesca]	1.25	0.0181085	0.0421961	yes	up
maker-Fvb7-3-augustus-gene-2.67	PREDICTED: short-chain dehydrogenase TIC 32, chloroplastic-like isoform X2 [Fragaria vesca subsp. vesca]	-3.50401	0	0	yes	down		maker-Fvb4-2-augustus-gene-60.29	PREDICTED: BTB/POZ domain-containing protein At1g67900 [Fragaria vesca subsp. vesca]	1.0744	1.79759e-62	6.94065e-61	yes	up
maker-Fvb2-3-snap-gene-78.65	PREDICTED: adenine phosphoribosyltransferase 5-like [Fragaria vesca subsp. vesca]	-1.29329	1.89e-22	2.50413e-21	yes	down		maker-Fvb2-3-augustus-gene-234.18	PREDICTED: TMV resistance protein N-like isoform X2 [Fragaria vesca subsp. vesca]	4.77921	3.8542e-07	1.90879e-06	yes	up
maker-Fvb7-4-augustus-gene-34.51	PREDICTED: uncharacterized protein LOC101300762 [Fragaria vesca subsp. vesca]	-1.3515	2.11e-36	4.52983e-35	yes	down		maker-Fvb2-1-augustus-gene-172.26	AUX1 [Fragaria x ananassa]	1.2767	2.72179e-21	3.44285e-20	yes	up
maker-Fvb1-3-augustus-gene-7.54	PREDICTED: transcription factor bHLH66-like [Fragaria vesca subsp. vesca]	-1.18759	6.86e-09	4.07592e-08	yes	down		augustus_masked-Fvb5-1-processed-gene-185.12	PREDICTED: putative calcium-binding protein CML19 [Fragaria vesca subsp. vesca]	1.99784	0.000231661	0.000794309	yes	up
maker-Fvb3-1-snap-gene-9.26	PREDICTED: uncharacterized protein LOC101295497 [Fragaria vesca subsp. vesca]	-2.49848	1.35e-147	1.59336e-145	yes	down		snap_masked-Fvb6-4-processed-gene-314.21	PREDICTED: B-box zinc finger protein 32-like [Fragaria vesca subsp. vesca]	1.71694	1.48329e-06	6.88416e-06	yes	up
maker-Fvb1-2-augustus-gene-136.40	phospho-2-dehydro-3-deoxyheptonate aldolase [Fragaria x ananassa]	-2.09176	2.63e-231	6.98116e-229	yes	down		maker-Fvb7-1-snap-gene-270.90	PREDICTED: receptor-like protein 12 [Fragaria vesca subsp. vesca]	2.66047	0.0204138	0.0469125	yes	up
MSTRG.6114	PREDICTED: uncharacterized protein LOC101309487 isoform X1 [Fragaria vesca subsp. vesca]	-1.65429	1.29e-49	3.83798e-48	yes	down		maker-Fvb6-4-augustus-gene-105.43	PREDICTED: protein REVEILLE 8 [Fragaria vesca subsp. vesca]	1.29466	1.38749e-65	5.60072e-64	yes	up
maker-Fvb7-4-augustus-gene-23.55	PREDICTED: transmembrane ascorbate ferrireductase 1 [Fragaria vesca subsp. vesca]	-1.46752	6.19e-108	4.66311e-106	yes	down		snap_masked-Fvb1-3-processed-gene-188.22	PREDICTED: receptor-like serine/threonine-protein kinase At4g25390 [Fragaria vesca subsp. vesca]	3.95056	1.40429e-72	6.36963e-71	yes	up
maker-Fvb1-1-augustus-gene-131.35	PREDICTED: probable WRKY transcription factor 13 [Fragaria vesca subsp. vesca]	-1.51842	0.00847725	0.0214959	yes	down		maker-Fvb1-2-augustus-gene-72.31	PREDICTED: lysine histidine transporter-like 8 [Fragaria vesca subsp. vesca]	2.66716	1.66779e-146	1.94177e-144	yes	up
MSTRG.20900	PREDICTED: uncharacterized aarF domain-containing protein kinase At1g79600, chloroplastic [Fragaria vesca subsp. vesca]	-1.07408	0.000315117	0.00105619	yes	down		MSTRG.39052	PREDICTED: RING-H2 finger protein ATL22-like isoform X1 [Fragaria vesca subsp. vesca]	1.1405	4.40909e-07	2.17037e-06	yes	up
maker-Fvb3-3-snap-gene-74.26	PREDICTED: DNA polymerase zeta processivity subunit isoform X1 [Fragaria vesca subsp. vesca]	-1.16241	1.51e-09	9.48636e-09	yes	down		maker-Fvb3-1-augustus-gene-210.34	basic leucine zipper 34-like [Rosa chinensis]	2.8749	1.39102e-06	6.48113e-06	yes	up
maker-Fvb3-3-augustus-gene-250.42	PREDICTED: probable fatty acyl-CoA reductase 5 isoform X2 [Fragaria vesca subsp. vesca]	-2.63597	3.11e-05	0.000121377	yes	down		maker-Fvb3-2-augustus-gene-188.30	PREDICTED: zinc finger CCCH domain-containing protein 46-like isoform X2 [Fragaria vesca subsp. vesca]	1.16684	2.12285e-09	1.31958e-08	yes	up
MSTRG.52853	PREDICTED: ethylene-responsive transcription factor ERF054-like [Fragaria vesca subsp. vesca]	-1.24829	2.3e-10	1.54063e-09	yes	down		maker-Fvb2-1-augustus-gene-156.34	PREDICTED: BTB/POZ and MATH domain-containing protein 2-like [Fragaria vesca subsp. vesca]	1.20014	2.78994e-44	7.38503e-43	yes	up
maker-Fvb1-1-augustus-gene-211.33	PREDICTED: uncharacterized protein LOC101294881 [Fragaria vesca subsp. vesca]	-1.04596	1.84e-22	2.44266e-21	yes	down		snap_masked-Fvb6-2-processed-gene-283.28	PREDICTED: uncharacterized protein LOC101296411 [Fragaria vesca subsp. vesca]	1.46564	0.00784271	0.0200412	yes	up
snap_masked-Fvb2-1-processed-gene-109.29	PREDICTED: probable sodium/metabolite cotransporter BASS3, chloroplastic [Fragaria vesca subsp. vesca]	-1.26275	8.44e-56	2.85527e-54	yes	down		augustus_masked-Fvb5-3-processed-gene-240.13	PREDICTED: uncharacterized protein LOC101312836 [Fragaria vesca subsp. vesca]	1.89494	8.9611e-10	5.7413e-09	yes	up
maker-Fvb3-3-snap-gene-5.44	PREDICTED: sucrose nonfermenting 4-like protein [Fragaria vesca subsp. vesca]	-1.07433	2.7e-09	1.66603e-08	yes	down		maker-Fvb1-4-snap-gene-167.23	--	3.40193	0.00151079	0.00449229	yes	up
maker-Fvb1-4-augustus-gene-164.35	PREDICTED: uncharacterized protein LOC101298068 [Fragaria vesca subsp. vesca]	-1.48285	1.44e-12	1.13947e-11	yes	down		maker-Fvb6-1-augustus-gene-23.45	PREDICTED: carbonic anhydrase 2 [Fragaria vesca subsp. vesca]	1.01487	1.0208e-128	9.68224e-127	yes	up
maker-Fvb3-1-augustus-gene-281.29	PREDICTED: acetolactate synthase small subunit 1, chloroplastic [Fragaria vesca subsp. vesca]	-1.02565	4.1e-49	1.20905e-47	yes	down		maker-Fvb6-2-snap-gene-163.55	PREDICTED: uncharacterized protein LOC101313325 [Fragaria vesca subsp. vesca]	1.04654	7.80422e-16	7.53801e-15	yes	up
maker-Fvb4-3-augustus-gene-1.51	PREDICTED: cytochrome P450 86B1 [Fragaria vesca subsp. vesca]	-2.09579	4.44e-06	1.94544e-05	yes	down		maker-Fvb7-2-augustus-gene-185.48	PREDICTED: probable serine/threonine-protein kinase At1g01540 [Fragaria vesca subsp. vesca]	2.40033	3.8026e-81	1.97163e-79	yes	up
maker-Fvb5-3-augustus-gene-158.19	PREDICTED: uncharacterized protein LOC101301109 [Fragaria vesca subsp. vesca]	-1.1206	8.57e-48	2.45658e-46	yes	down		maker-Fvb3-1-augustus-gene-16.40	PREDICTED: uncharacterized protein LOC105350727 [Fragaria vesca subsp. vesca]	5.43803	3.3303e-05	0.000129569	yes	up
MSTRG.27217	uncharacterized protein LOC112171343 [Rosa chinensis]	-1.17193	3.43e-07	1.70924e-06	yes	down		augustus_masked-Fvb2-1-processed-gene-151.18	PREDICTED: uncharacterized protein LOC101305340 isoform X1 [Fragaria vesca subsp. vesca]	1.09521	4.65426e-29	7.93949e-28	yes	up
MSTRG.17148	PREDICTED: glucan endo-1,3-beta-glucosidase 4 [Fragaria vesca subsp. vesca]	-1.23141	2.77e-54	9.08802e-53	yes	down		maker-Fvb3-1-snap-gene-270.44	linoleate 13S-lipoxygenase 3-1, chloroplastic-like isoform X1 [Rosa chinensis]	1.4085	0.0174306	0.0408106	yes	up
MSTRG.18883	PREDICTED: GDP-L-galactose phosphorylase 1-like isoform X1 [Fragaria vesca subsp. vesca]	-1.47852	1.03e-07	5.44153e-07	yes	down		augustus_masked-Fvb2-3-processed-gene-63.17	PREDICTED: zinc finger protein ZAT10 [Fragaria vesca subsp. vesca]	2.9998	1.72394e-86	9.78421e-85	yes	up
maker-Fvb6-3-augustus-gene-105.39	PREDICTED: uncharacterized protein LOC101291939 [Fragaria vesca subsp. vesca]	-2.80415	6.82e-75	3.20137e-73	yes	down		snap_masked-Fvb1-3-processed-gene-157.10	PREDICTED: uncharacterized protein LOC105349534 isoform X4 [Fragaria vesca subsp. vesca]	3.00908	1.41929e-07	7.37373e-07	yes	up
MSTRG.54153	PREDICTED: dnaJ homolog subfamily B member 3 [Fragaria vesca subsp. vesca]	-1.51798	1.04e-164	1.47248e-162	yes	down		maker-Fvb7-2-augustus-gene-72.29	PREDICTED: uncharacterized protein LOC101294899 isoform X1 [Fragaria vesca subsp. vesca]	1.00967	0.0132381	0.0319424	yes	up
maker-Fvb2-1-snap-gene-53.40	PREDICTED: 2-Cys peroxiredoxin BAS1, chloroplastic [Fragaria vesca subsp. vesca]	-1.27886	3.07e-11	2.19837e-10	yes	down		augustus_masked-Fvb7-3-processed-gene-217.6	PREDICTED: uncharacterized protein At1g04910-like [Fragaria vesca subsp. vesca]	5.77373	0.000108101	0.000390349	yes	up
maker-Fvb6-3-augustus-gene-394.51	PREDICTED: serine/threonine-protein kinase At3g07070-like [Fragaria vesca subsp. vesca]	-1.23683	3.2e-13	2.643e-12	yes	down		maker-Fvb3-1-snap-gene-228.57	PREDICTED: NAC domain-containing protein 21/22-like isoform X1 [Fragaria vesca subsp. vesca]	1.44501	0.0207447	0.047568	yes	up
maker-Fvb3-1-augustus-gene-224.50	PREDICTED: ubiquitin carboxyl-terminal hydrolase 15 isoform X1 [Fragaria vesca subsp. vesca]	-1.37917	2.73e-77	1.33003e-75	yes	down		maker-Fvb1-1-snap-gene-217.54	PREDICTED: cyclic nucleotide-gated ion channel 1-like [Fragaria vesca subsp. vesca]	2.36374	0.000118043	0.000423529	yes	up
snap_masked-Fvb3-4-processed-gene-109.14	PREDICTED: arogenate dehydratase/prephenate dehydratase 6, chloroplastic [Fragaria vesca subsp. vesca]	-2.4747	7.99e-15	7.29221e-14	yes	down		maker-Fvb6-4-snap-gene-263.46	PREDICTED: protein FLUORESCENT IN BLUE LIGHT, chloroplastic isoform X1 [Fragaria vesca subsp. vesca]	1.02579	2.17922e-06	9.901e-06	yes	up
maker-Fvb7-3-snap-gene-173.63	PREDICTED: fatty acyl-CoA reductase 3-like [Fragaria vesca subsp. vesca]	-2.095	0.0189457	0.0439277	yes	down		augustus_masked-Fvb4-3-processed-gene-199.4	PREDICTED: major allergen Pru av 1-like [Fragaria vesca subsp. vesca]	2.36396	9.3628e-172	1.43988e-169	yes	up
maker-Fvb7-1-augustus-gene-159.24	PREDICTED: uncharacterized protein LOC101297504 [Fragaria vesca subsp. vesca]	-1.44536	0.000845158	0.00263511	yes	down		maker-Fvb7-3-augustus-gene-27.63	PREDICTED: probable membrane-associated kinase regulator 6 [Fragaria vesca subsp. vesca]	1.41739	1.16473e-12	9.2603e-12	yes	up
MSTRG.8564	PREDICTED: vacuolar iron transporter homolog 2-like [Fragaria vesca subsp. vesca]	-1.06057	0.00418935	0.0114039	yes	down		maker-Fvb3-3-augustus-gene-86.52	PREDICTED: uncharacterized protein LOC101310586 [Fragaria vesca subsp. vesca]	1.10328	4.9802e-48	1.43575e-46	yes	up
maker-Fvb6-2-augustus-gene-237.38	PREDICTED: sucrose nonfermenting 4-like protein [Fragaria vesca subsp. vesca]	-1.53088	3.08e-43	7.95864e-42	yes	down		augustus_masked-Fvb7-1-processed-gene-258.8	PREDICTED: 50S ribosomal protein L1, chloroplastic isoform X2 [Fragaria vesca subsp. vesca]	3.4063	7.80259e-05	0.000287889	yes	up
maker-Fvb7-4-augustus-gene-106.52	PREDICTED: desiccation protectant protein Lea14 homolog [Fragaria vesca subsp. vesca]	-1.59031	3.97e-140	4.37259e-138	yes	down		maker-Fvb6-4-augustus-gene-236.49	PREDICTED: mitochondrial arginine transporter BAC2-like [Fragaria vesca subsp. vesca]	2.26596	9.20289e-05	0.000335861	yes	up
augustus_masked-Fvb6-3-processed-gene-292.5	PREDICTED: peroxiredoxin-2E-2, chloroplastic [Fragaria vesca subsp. vesca]	-1.4765	1.77e-06	8.13696e-06	yes	down		maker-Fvb6-1-augustus-gene-24.53	PREDICTED: CASP-like protein 4A1 [Fragaria vesca subsp. vesca]	1.14926	7.6596e-05	0.000282959	yes	up
maker-Fvb6-2-snap-gene-205.50	PREDICTED: lactosylceramide 4-alpha-galactosyltransferase-like [Fragaria vesca subsp. vesca]	-1.25047	7.99e-17	8.1528e-16	yes	down		maker-Fvb4-3-augustus-gene-26.32	PREDICTED: auxin efflux carrier component 3-like [Fragaria vesca subsp. vesca]	1.13462	7.0108e-42	1.74703e-40	yes	up
snap_masked-Fvb3-3-processed-gene-146.8	PREDICTED: transcription factor LHW [Fragaria vesca subsp. vesca]	-1.01895	4.46e-21	5.59247e-20	yes	down		augustus_masked-Fvb3-4-processed-gene-60.2	PREDICTED: scarecrow-like protein 30 [Fragaria vesca subsp. vesca]	2.33811	0.000662543	0.0021056	yes	up
MSTRG.3117	PREDICTED: uncharacterized aarF domain-containing protein kinase At1g79600, chloroplastic [Fragaria vesca subsp. vesca]	-1.13081	0.00860159	0.021774	yes	down		augustus_masked-Fvb3-1-processed-gene-296.7	PREDICTED: polyphenol oxidase, chloroplastic-like [Fragaria vesca subsp. vesca]	1.31905	0.0130778	0.0316129	yes	up
maker-Fvb7-1-augustus-gene-58.25	PREDICTED: OTU domain-containing protein At3g57810-like [Fragaria vesca subsp. vesca]	-1.22266	2.12e-49	6.28839e-48	yes	down		maker-Fvb5-1-snap-gene-68.91	hypothetical protein RchiOBHm_Chr7g0187591 [Rosa chinensis]	4.90384	1.11691e-31	2.07318e-30	yes	up
augustus_masked-Fvb2-1-processed-gene-171.8	PREDICTED: pentatricopeptide repeat-containing protein At4g08210 [Fragaria vesca subsp. vesca]	-1.78187	1.69e-46	4.7064e-45	yes	down		MSTRG.57519	PREDICTED: protein GLUTAMINE DUMPER 1-like [Fragaria vesca subsp. vesca]	2.15415	0.0190439	0.0441193	yes	up
snap_masked-Fvb7-3-processed-gene-1.40	PREDICTED: scarecrow-like protein 8 [Fragaria vesca subsp. vesca]	-1.86272	0.00801287	0.0204386	yes	down		maker-Fvb4-3-snap-gene-196.48	PREDICTED: bifunctional epoxide hydrolase 2-like isoform X1 [Fragaria vesca subsp. vesca]	1.02566	2.18973e-20	2.65953e-19	yes	up
augustus_masked-Fvb2-4-processed-gene-40.5	PREDICTED: probable carboxylesterase 5 [Fragaria vesca subsp. vesca]	-1.31594	6.76e-11	4.71782e-10	yes	down		maker-Fvb6-2-snap-gene-150.57	PREDICTED: alpha carbonic anhydrase 1, chloroplastic [Fragaria vesca subsp. vesca]	1.15073	1.66319e-99	1.13103e-97	yes	up
maker-Fvb2-3-augustus-gene-162.26	PREDICTED: uncharacterized protein LOC101295094 [Fragaria vesca subsp. vesca]	-1.50481	1.1e-104	7.97898e-103	yes	down		MSTRG.11890	PREDICTED: auxin-induced protein 15A-like [Fragaria vesca subsp. vesca]	2.2909	0.000421168	0.0013851	yes	up
maker-Fvb4-4-augustus-gene-82.53	PREDICTED: transcription factor HY5-like isoform X2 [Fragaria vesca subsp. vesca]	-2.38517	1.53e-120	1.33633e-118	yes	down		maker-Fvb5-2-augustus-gene-57.24	PREDICTED: toll/interleukin-1 receptor-like protein isoform X2 [Fragaria vesca subsp. vesca]	1.09554	0.0134672	0.0324427	yes	up
maker-Fvb6-4-snap-gene-58.38	PREDICTED: GDSL esterase/lipase At1g09390 isoform X1 [Fragaria vesca subsp. vesca]	-1.34102	0.00440099	0.0119212	yes	down		maker-Fvb1-3-snap-gene-127.47	lysM domain receptor-like kinase 3 [Rosa chinensis]	2.63958	8.32237e-35	1.70477e-33	yes	up
MSTRG.18089	putative alpha/Beta hydrolase [Rosa chinensis]	-1.10625	1.67e-06	7.69444e-06	yes	down		maker-Fvb7-4-augustus-gene-134.36	PREDICTED: probable pectinesterase/pectinesterase inhibitor 17 [Fragaria vesca subsp. vesca]	1.93917	6.80371e-15	6.23898e-14	yes	up
maker-Fvb7-1-augustus-gene-305.34	PREDICTED: putative transporter arsB [Fragaria vesca subsp. vesca]	-1.30803	3.43e-06	1.52118e-05	yes	down		maker-Fvb4-3-snap-gene-127.53	PREDICTED: major allergen Pru av 1-like [Fragaria vesca subsp. vesca]	2.42988	1.36233e-24	1.97127e-23	yes	up
maker-Fvb1-4-augustus-gene-4.54	PREDICTED: aldehyde dehydrogenase family 2 member C4-like [Fragaria vesca subsp. vesca]	-3.63538	1.56e-229	4.0377e-227	yes	down		MSTRG.25985	PREDICTED: ethylene-responsive transcription factor 4 [Fragaria vesca subsp. vesca]	2.29417	7.14967e-83	3.82079e-81	yes	up
augustus_masked-Fvb4-3-processed-gene-34.10	PREDICTED: uncharacterized protein LOC105351146 [Fragaria vesca subsp. vesca]	-1.37036	0.00760732	0.0194952	yes	down		maker-Fvb2-4-snap-gene-173.56	PREDICTED: uncharacterized protein LOC101301347 [Fragaria vesca subsp. vesca]	1.36342	9.37206e-57	3.22419e-55	yes	up
maker-Fvb4-3-snap-gene-130.54	PREDICTED: myb-related protein 330 [Fragaria vesca subsp. vesca]	-2.51794	5.01e-12	3.79912e-11	yes	down		augustus_masked-Fvb6-1-processed-gene-183.2	PREDICTED: pentatricopeptide repeat-containing protein At2g13600-like [Fragaria vesca subsp. vesca]	3.27464	0.00558678	0.0147396	yes	up
maker-Fvb5-4-augustus-gene-227.27	PREDICTED: phospho-2-dehydro-3-deoxyheptonate aldolase 2, chloroplastic-like [Fragaria vesca subsp. vesca]	-1.03934	9.19e-33	1.76122e-31	yes	down		maker-Fvb7-1-snap-gene-259.48	PREDICTED: cytochrome P450 90A1 [Fragaria vesca subsp. vesca]	1.80559	0	0	yes	up
maker-Fvb6-4-augustus-gene-242.23	PREDICTED: ABC transporter G family member 29 [Fragaria vesca subsp. vesca]	-1.63689	6.98e-06	2.9808e-05	yes	down		MSTRG.12893	PREDICTED: parathymosin-like [Fragaria vesca subsp. vesca]	1.01225	5.53283e-08	2.99653e-07	yes	up
augustus_masked-Fvb1-3-processed-gene-113.2	PREDICTED: phosphoenolpyruvate carboxykinase [ATP]-like [Fragaria vesca subsp. vesca]	-1.37844	1.74e-40	4.20407e-39	yes	down		augustus_masked-Fvb6-4-processed-gene-5.17	PREDICTED: uncharacterized protein LOC105352542 [Fragaria vesca subsp. vesca]	1.24572	1.83847e-08	1.04894e-07	yes	up
MSTRG.33151	putative armadillo-like helical, condensin subunit 1/Condensin-2 complex subunit D3 [Rosa chinensis]	-1.19717	0.00833088	0.0211633	yes	down		maker-Fvb5-1-augustus-gene-4.58	PREDICTED: flavonoid 3&apos;,5&apos;-hydroxylase-like [Fragaria vesca subsp. vesca]	1.00454	7.64047e-110	5.91523e-108	yes	up
snap_masked-Fvb6-4-processed-gene-308.24	PREDICTED: uncharacterized protein LOC101301060 [Fragaria vesca subsp. vesca]	-2.15932	0	0	yes	down		maker-Fvb6-4-augustus-gene-13.52	PREDICTED: xyloglucan glycosyltransferase 4-like isoform X1 [Fragaria vesca subsp. vesca]	2.02947	1.10671e-10	7.58932e-10	yes	up
augustus_masked-Fvb2-2-processed-gene-26.8	PREDICTED: retrotransposon-like protein 1 [Fragaria vesca subsp. vesca]	-1.39522	3.54e-14	3.10353e-13	yes	down		maker-Fvb5-2-snap-gene-96.53	exonuclease 1 [Rosa chinensis]	2.12478	3.64958e-05	0.000141275	yes	up
MSTRG.24341	PREDICTED: uncharacterized protein LOC101311259 [Fragaria vesca subsp. vesca]	-1.37866	6.81e-05	0.000253483	yes	down		snap_masked-Fvb5-1-processed-gene-19.48	PREDICTED: uncharacterized protein LOC101295341 isoform X1 [Fragaria vesca subsp. vesca]	2.54608	3.43339e-13	2.83294e-12	yes	up
MSTRG.36618	PREDICTED: succinate dehydrogenase assembly factor 1, mitochondrial [Fragaria vesca subsp. vesca]	-1.14139	2.01e-05	8.05158e-05	yes	down		maker-Fvb7-4-augustus-gene-52.51	PREDICTED: uncharacterized protein LOC101311909 [Fragaria vesca subsp. vesca]	1.09353	9.78515e-06	4.09229e-05	yes	up
maker-Fvb5-4-snap-gene-164.40	PREDICTED: uncharacterized protein LOC101309157 [Fragaria vesca subsp. vesca]	-1.12918	1.32e-65	5.32871e-64	yes	down		maker-Fvb6-2-snap-gene-65.27	PREDICTED: putative disease resistance protein RGA3 [Fragaria vesca subsp. vesca]	1.43897	8.38793e-69	3.57715e-67	yes	up
maker-Fvb2-3-augustus-gene-80.28	PREDICTED: ethylene-responsive transcription factor SHINE 2-like [Fragaria vesca subsp. vesca]	-1.89569	7.93e-05	0.000292032	yes	down		maker-Fvb5-3-augustus-gene-198.47	PREDICTED: thioredoxin-like 1-2, chloroplastic [Fragaria vesca subsp. vesca]	1.04563	1.53542e-06	7.11078e-06	yes	up
MSTRG.23535	PREDICTED: meiotic recombination protein SPO11-1 isoform X2 [Fragaria vesca subsp. vesca]	-2.3118	3.49e-14	3.06655e-13	yes	down		maker-Fvb4-3-snap-gene-268.31	PREDICTED: mannosyl-oligosaccharide 1,2-alpha-mannosidase MNS2-like isoform X1 [Fragaria vesca subsp. vesca]	2.16617	1.28018e-06	5.98935e-06	yes	up
maker-Fvb7-1-augustus-gene-80.13	PREDICTED: protein ECERIFERUM 1-like [Fragaria vesca subsp. vesca]	-5.97057	2.94e-11	2.11165e-10	yes	down		snap_masked-Fvb4-3-processed-gene-21.34	G-type lectin S-receptor-like serine/threonine-protein kinase At1g34300 [Rosa chinensis]	1.6349	2.53026e-40	6.0778e-39	yes	up
augustus_masked-Fvb6-3-processed-gene-62.2	PREDICTED: zinc finger CCCH domain-containing protein 3 [Fragaria vesca subsp. vesca]	-1.27871	2.13e-14	1.88773e-13	yes	down		maker-Fvb1-1-augustus-gene-192.61	PREDICTED: probable 2-oxoglutarate-dependent dioxygenase At3g49630 [Fragaria vesca subsp. vesca]	1.52474	1.91868e-13	1.61146e-12	yes	up
maker-Fvb3-1-augustus-gene-287.74	PREDICTED: probable WRKY transcription factor 71 [Fragaria vesca subsp. vesca]	-1.76918	0.0217209	0.0495117	yes	down		snap_masked-Fvb1-4-processed-gene-10.47	hypothetical protein RchiOBHm_Chr2g0089531 [Rosa chinensis]	2.71075	0.000714812	0.00225766	yes	up
maker-Fvb3-1-augustus-gene-265.42	PREDICTED: ADP-ribosylation factor GTPase-activating protein AGD12-like [Fragaria vesca subsp. vesca]	-1.14272	1.24e-18	1.38127e-17	yes	down		maker-Fvb3-4-snap-gene-245.56	PREDICTED: linoleate 13S-lipoxygenase 3-1, chloroplastic-like [Fragaria vesca subsp. vesca]	1.67723	0.000631112	0.00201355	yes	up
maker-Fvb7-4-augustus-gene-150.22	PREDICTED: cytochrome c oxidase-assembly factor COX23, mitochondrial [Fragaria vesca subsp. vesca]	-1.66591	2.29e-37	5.0634e-36	yes	down		MSTRG.6291	hypothetical protein RchiOBHm_Chr6g0310131 [Rosa chinensis]	1.01387	6.41777e-13	5.1946e-12	yes	up
maker-Fvb3-2-augustus-gene-70.44	PREDICTED: vacuolar-sorting receptor 6 [Fragaria vesca subsp. vesca]	-1.12081	9.36e-79	4.63912e-77	yes	down		augustus_masked-Fvb3-3-processed-gene-7.9	PREDICTED: polyphenol oxidase, chloroplastic-like [Fragaria vesca subsp. vesca]	1.47605	8.23622e-05	0.000302729	yes	up
snap_masked-Fvb2-4-processed-gene-50.15	PREDICTED: uncharacterized protein LOC105349697 [Fragaria vesca subsp. vesca]	-1.55266	6.47e-76	3.09624e-74	yes	down		maker-Fvb6-1-augustus-gene-69.50	PREDICTED: glycine-rich cell wall structural protein-like [Fragaria vesca subsp. vesca]	3.92197	2.44753e-14	2.16526e-13	yes	up
maker-Fvb5-3-snap-gene-262.69	glutathione peroxidase 6, partial [Fragaria x ananassa]	-2.86639	0	0	yes	down		maker-Fvb7-1-augustus-gene-187.31	PREDICTED: aquaporin PIP1-3 [Fragaria vesca subsp. vesca]	2.14668	3.43356e-282	1.20548e-279	yes	up
maker-Fvb6-1-augustus-gene-190.37	PREDICTED: RRP12-like protein [Fragaria vesca subsp. vesca]	-1.10497	6.99e-28	1.14623e-26	yes	down		augustus_masked-Fvb5-1-processed-gene-157.4	PREDICTED: CSC1-like protein At1g32090 [Fragaria vesca subsp. vesca]	1.9314	4.5796e-07	2.2502e-06	yes	up
maker-Fvb4-4-snap-gene-12.66	PREDICTED: DEAD-box ATP-dependent RNA helicase ISE2, chloroplastic [Fragaria vesca subsp. vesca]	-1.33552	3.15e-16	3.11161e-15	yes	down		augustus_masked-Fvb5-1-processed-gene-198.6	PREDICTED: auxin-induced protein 15A-like [Fragaria vesca subsp. vesca]	1.12426	2.06011e-05	8.26132e-05	yes	up
maker-Fvb6-3-augustus-gene-17.41	PREDICTED: probable galactinol--sucrose galactosyltransferase 5 [Fragaria vesca subsp. vesca]	-1.78816	3.32e-113	2.66898e-111	yes	down		MSTRG.2524	hypothetical protein RchiOBHm_Chr2g0085461 [Rosa chinensis]	1.63908	2.01124e-19	2.32937e-18	yes	up
maker-Fvb5-3-snap-gene-269.58	uncharacterized protein LOC112176076 [Rosa chinensis]	-1.45257	6.69e-30	1.17443e-28	yes	down		maker-Fvb7-4-snap-gene-36.87	PREDICTED: receptor-like protein 12 [Fragaria vesca subsp. vesca]	1.16088	0.00830566	0.0211051	yes	up
maker-Fvb1-1-augustus-gene-257.54	PREDICTED: uncharacterized protein LOC101305100 [Fragaria vesca subsp. vesca]	-1.05042	2.5e-29	4.30891e-28	yes	down		maker-Fvb4-1-augustus-gene-193.33	PREDICTED: formin-like protein 8 [Fragaria vesca subsp. vesca]	1.58257	1.47656e-27	2.38581e-26	yes	up
maker-Fvb3-1-augustus-gene-12.20	PREDICTED: ABC transporter C family member 10-like [Fragaria vesca subsp. vesca]	-2.26821	1.49e-224	3.68912e-222	yes	down		maker-Fvb7-2-augustus-gene-176.53	PREDICTED: proline-rich protein HaeIII subfamily 1-like [Fragaria vesca subsp. vesca]	1.03774	4.91719e-27	7.83058e-26	yes	up
maker-Fvb1-2-augustus-gene-32.63	uncharacterized protein LOC101300089 [Fragaria vesca]	-1.87995	1.94e-05	7.81436e-05	yes	down		maker-Fvb2-3-snap-gene-33.59	PREDICTED: jasmonate O-methyltransferase-like [Fragaria vesca subsp. vesca]	1.2555	9.26382e-32	1.72128e-30	yes	up
maker-Fvb5-2-augustus-gene-28.32	PREDICTED: mitochondrial inner membrane protein OXA1 [Fragaria vesca subsp. vesca]	-1.33911	4.68e-34	9.36512e-33	yes	down		maker-Fvb5-2-augustus-gene-116.38	PREDICTED: uncharacterized protein LOC101314377 isoform X2 [Fragaria vesca subsp. vesca]	1.02684	0.0103356	0.0256516	yes	up
maker-Fvb1-3-augustus-gene-127.30	PREDICTED: B3 domain-containing protein REM5-like [Fragaria vesca subsp. vesca]	-1.57971	0.000304342	0.00102269	yes	down		maker-Fvb4-2-snap-gene-226.42	PREDICTED: protein NRT1/ PTR FAMILY 5.2-like [Fragaria vesca subsp. vesca]	1.87931	3.07677e-18	3.36957e-17	yes	up
snap_masked-Fvb7-4-processed-gene-138.36	PREDICTED: zinc finger BED domain-containing protein RICESLEEPER 1-like [Fragaria vesca subsp. vesca]	-1.82785	0.000145208	0.000514175	yes	down		maker-Fvb2-4-snap-gene-30.39	PREDICTED: protein STAY-GREEN LIKE, chloroplastic [Fragaria vesca subsp. vesca]	1.40449	0.00968855	0.024223	yes	up
augustus_masked-Fvb4-1-processed-gene-150.9	hypothetical protein RchiOBHm_Chr4g0435171 [Rosa chinensis]	-1.52835	2.25e-36	4.83436e-35	yes	down		maker-Fvb6-3-snap-gene-122.57	beta-galactosidase [Fragaria x ananassa]	1.20445	1.53815e-17	1.62689e-16	yes	up
maker-Fvb1-4-augustus-gene-9.57	PREDICTED: anthocyanidin 3-O-glucosyltransferase 7-like [Fragaria vesca subsp. vesca]	-2.02195	7.23e-07	3.47864e-06	yes	down		augustus_masked-Fvb6-1-processed-gene-28.1	PREDICTED: putative disease resistance protein At1g50180 [Fragaria vesca subsp. vesca]	1.23139	4.12419e-13	3.38228e-12	yes	up
maker-Fvb1-4-snap-gene-65.79	PREDICTED: cytochrome P450 90B1 [Fragaria vesca subsp. vesca]	-1.25098	1.47e-17	1.55437e-16	yes	down		augustus_masked-Fvb4-1-processed-gene-87.9	PREDICTED: putative lipid-transfer protein DIR1 [Fragaria vesca subsp. vesca]	1.11669	7.36148e-10	4.74328e-09	yes	up
maker-Fvb6-3-augustus-gene-196.39	PREDICTED: alpha carbonic anhydrase 4-like [Fragaria vesca subsp. vesca]	-1.06212	2.98e-08	1.66152e-07	yes	down		maker-Fvb6-1-augustus-gene-24.42	PREDICTED: apoptosis-enhancing nuclease isoform X1 [Fragaria vesca subsp. vesca]	2.88354	4.90547e-06	2.13832e-05	yes	up
maker-Fvb6-4-snap-gene-48.61	PREDICTED: psbP domain-containing protein 7, chloroplastic [Fragaria vesca subsp. vesca]	-1.07121	1.58e-05	6.40842e-05	yes	down		maker-Fvb4-3-augustus-gene-67.49	PREDICTED: uncharacterized protein LOC101305160 isoform X1 [Fragaria vesca subsp. vesca]	2.54715	7.0773e-81	3.64658e-79	yes	up
maker-Fvb6-2-augustus-gene-186.33	PREDICTED: uncharacterized protein LOC101298051 [Fragaria vesca subsp. vesca]	-1.01718	5.01e-08	2.72204e-07	yes	down		maker-Fvb1-3-augustus-gene-156.30	hypothetical protein RchiOBHm_Chr2g0118101 [Rosa chinensis]	1.85538	1.17148e-18	1.31167e-17	yes	up
snap_masked-Fvb5-3-processed-gene-204.23	PREDICTED: replication protein A 70 kDa DNA-binding subunit B [Fragaria vesca subsp. vesca]	-2.89663	9.7e-64	3.81437e-62	yes	down		snap_masked-Fvb2-4-processed-gene-214.36	PREDICTED: uncharacterized protein LOC101303764 [Fragaria vesca subsp. vesca]	2.36561	0.00115654	0.00351261	yes	up
maker-Fvb1-3-augustus-gene-128.40	phospho-2-dehydro-3-deoxyheptonate aldolase [Fragaria x ananassa]	-2.11646	2.08e-170	3.16915e-168	yes	down		maker-Fvb7-2-snap-gene-50.30	PREDICTED: diphosphomevalonate decarboxylase [Fragaria vesca subsp. vesca]	1.25127	1.09874e-78	5.42961e-77	yes	up
maker-Fvb6-1-snap-gene-164.44	metal transporter Nramp6 isoform X1 [Rosa chinensis]	-1.09146	1.1e-20	1.35974e-19	yes	down		maker-Fvb4-3-snap-gene-34.74	PREDICTED: phosphate transporter PHO1 homolog 3-like [Fragaria vesca subsp. vesca]	2.39583	4.75605e-31	8.65771e-30	yes	up
maker-Fvb6-2-augustus-gene-289.39	polygalacturonase At1g48100 isoform X1 [Rosa chinensis]	-1.54597	1.04e-07	5.47686e-07	yes	down		augustus_masked-Fvb5-2-processed-gene-218.3	PREDICTED: mitochondrial uncoupling protein 4 [Fragaria vesca subsp. vesca]	1.63955	2.28543e-50	6.90747e-49	yes	up
maker-Fvb3-2-augustus-gene-306.28	PREDICTED: protein YLS3 [Fragaria vesca subsp. vesca]	-3.97841	0.00160659	0.00475065	yes	down		maker-Fvb5-1-snap-gene-9.62	PREDICTED: lysophospholipid acyltransferase 1 [Fragaria vesca subsp. vesca]	1.01119	3.38205e-31	6.18387e-30	yes	up
maker-Fvb3-3-augustus-gene-155.22	PREDICTED: NAC domain-containing protein 72-like [Fragaria vesca subsp. vesca]	-3.48656	1.54e-07	7.99313e-07	yes	down		maker-Fvb4-4-augustus-gene-124.27	PREDICTED: uncharacterized protein LOC101310110 [Fragaria vesca subsp. vesca]	3.79955	2.92691e-256	8.98719e-254	yes	up
MSTRG.24465	PREDICTED: DEAD-box ATP-dependent RNA helicase 37-like [Fragaria vesca subsp. vesca]	-1.01466	2.1e-60	7.73024e-59	yes	down		MSTRG.36626	PREDICTED: uncharacterized protein LOC105351905 [Fragaria vesca subsp. vesca]	1.20541	4.29398e-05	0.000164574	yes	up
MSTRG.793	PREDICTED: putative F-box protein At5g60060 [Fragaria vesca subsp. vesca]	-1.08184	0.0089587	0.0225862	yes	down		maker-Fvb2-2-augustus-gene-126.25	PREDICTED: trihelix transcription factor GT-2-like [Fragaria vesca subsp. vesca]	1.1189	1.09469e-26	1.7215e-25	yes	up
maker-Fvb7-1-augustus-gene-300.57	PREDICTED: two-component response regulator-like APRR5 [Fragaria vesca subsp. vesca]	-3.51809	0	0	yes	down		MSTRG.3221	PREDICTED: serine/arginine repetitive matrix protein 1-like [Fragaria vesca subsp. vesca]	1.15962	0.000236034	0.000808477	yes	up
MSTRG.12094	polyadenylate-binding protein 2-like isoform X2 [Rosa chinensis]	-2.41484	5.99e-44	1.57691e-42	yes	down		maker-Fvb2-3-augustus-gene-183.23	PREDICTED: la-related protein 6C [Fragaria vesca subsp. vesca]	2.59332	6.37311e-06	2.73711e-05	yes	up
maker-Fvb5-3-augustus-gene-25.34	PREDICTED: uncharacterized protein LOC101312060 [Fragaria vesca subsp. vesca]	-1.16214	2.27e-17	2.38887e-16	yes	down		MSTRG.45928	--	1.54229	4.32978e-57	1.50151e-55	yes	up
augustus_masked-Fvb2-2-processed-gene-99.16	PREDICTED: probable anion transporter 5 [Fragaria vesca subsp. vesca]	-1.34119	0.0142163	0.0340434	yes	down		augustus_masked-Fvb5-4-processed-gene-0.5	PREDICTED: 14 kDa proline-rich protein DC2.15 [Fragaria vesca subsp. vesca]	1.41063	0.000434273	0.00142514	yes	up
augustus_masked-Fvb5-4-processed-gene-64.7	PREDICTED: malate dehydrogenase, chloroplastic [Fragaria vesca subsp. vesca]	-1.66431	2.55e-153	3.19958e-151	yes	down		augustus_masked-Fvb7-1-processed-gene-301.4	PREDICTED: probable L-type lectin-domain containing receptor kinase S.7 [Fragaria vesca subsp. vesca]	1.55307	5.96166e-26	9.10646e-25	yes	up
maker-Fvb7-3-augustus-gene-156.26	PREDICTED: uncharacterized protein At1g28695-like [Fragaria vesca subsp. vesca]	-1.5177	0.0180399	0.0420665	yes	down		maker-Fvb2-3-augustus-gene-73.40	PREDICTED: amino-acid permease BAT1 homolog [Fragaria vesca subsp. vesca]	1.49581	0.000736295	0.00232021	yes	up
maker-Fvb2-3-snap-gene-83.81	PREDICTED: glutathione S-transferase F13-like [Fragaria vesca subsp. vesca]	-1.20417	1.78e-85	9.92265e-84	yes	down		maker-Fvb7-2-augustus-gene-183.46	PREDICTED: uncharacterized protein LOC101295853 [Fragaria vesca subsp. vesca]	2.78737	0.00026887	0.000911711	yes	up
snap_masked-Fvb4-4-processed-gene-20.37	PREDICTED: uncharacterized protein LOC101303511 [Fragaria vesca subsp. vesca]	-1.24611	0.0155251	0.0368222	yes	down		augustus_masked-Fvb2-2-processed-gene-224.3	PREDICTED: subtilisin-like protease [Fragaria vesca subsp. vesca]	2.02205	8.57045e-84	4.6542e-82	yes	up
MSTRG.23482	PREDICTED: uncharacterized protein LOC101315024 isoform X1 [Fragaria vesca subsp. vesca]	-1.21276	5.12e-75	2.40797e-73	yes	down		maker-Fvb5-2-snap-gene-211.30	PREDICTED: TMV resistance protein N-like [Fragaria vesca subsp. vesca]	1.30337	0.00309187	0.00864878	yes	up
maker-Fvb1-3-snap-gene-21.72	PREDICTED: uncharacterized protein LOC101309487 isoform X1 [Fragaria vesca subsp. vesca]	-1.15451	5.46e-19	6.20227e-18	yes	down		MSTRG.10552	PREDICTED: LRR receptor-like serine/threonine-protein kinase ERECTA [Fragaria vesca subsp. vesca]	1.78349	5.56369e-126	5.10086e-124	yes	up
maker-Fvb4-3-snap-gene-78.71	PREDICTED: uncharacterized protein LOC101308762 [Fragaria vesca subsp. vesca]	-1.70344	1.58e-40	3.79845e-39	yes	down		maker-Fvb5-3-augustus-gene-179.47	PREDICTED: dihydropyrimidine dehydrogenase [NADP(+)] [Fragaria vesca subsp. vesca]	1.1632	1.44668e-28	2.4321e-27	yes	up
snap_masked-Fvb2-3-processed-gene-102.36	PREDICTED: glutathione reductase, chloroplastic [Fragaria vesca subsp. vesca]	-1.23459	1.33e-49	3.95563e-48	yes	down		maker-Fvb4-4-augustus-gene-105.42	PREDICTED: translationally-controlled tumor protein homolog [Fragaria vesca subsp. vesca]	1.14215	1.16994e-76	5.65498e-75	yes	up
snap_masked-Fvb1-1-processed-gene-205.21	PREDICTED: calcium uniporter protein 2, mitochondrial [Fragaria vesca subsp. vesca]	-1.59546	1.35e-18	1.50749e-17	yes	down		maker-Fvb3-2-snap-gene-86.53	disease resistance protein RML1A-like [Rosa chinensis]	1.36381	0.00382615	0.0104947	yes	up
maker-Fvb2-4-augustus-gene-118.16	PREDICTED: uncharacterized protein LOC101310567 [Fragaria vesca subsp. vesca]	-1.53486	1.06e-18	1.18493e-17	yes	down		maker-Fvb2-3-snap-gene-76.58	PREDICTED: putative protein TPRXL [Fragaria vesca subsp. vesca]	1.15733	1.79578e-17	1.89276e-16	yes	up
maker-Fvb6-2-augustus-gene-281.53	PREDICTED: ribosome-recycling factor, chloroplastic isoform X1 [Fragaria vesca subsp. vesca]	-1.13632	1.7e-10	1.15051e-09	yes	down		augustus_masked-Fvb3-3-processed-gene-11.2	PREDICTED: ornithine aminotransferase, mitochondrial [Fragaria vesca subsp. vesca]	1.86818	2.57791e-07	1.30045e-06	yes	up
maker-Fvb6-1-snap-gene-313.72	PREDICTED: putative L-cysteine desulfhydrase 1 [Fragaria vesca subsp. vesca]	-1.05273	2.7e-07	1.36006e-06	yes	down		maker-Fvb4-2-augustus-gene-15.51	PREDICTED: polygalacturonase At1g48100 [Fragaria vesca subsp. vesca]	1.47161	4.55589e-45	1.2242e-43	yes	up
maker-Fvb5-4-snap-gene-48.90	PREDICTED: uncharacterized protein LOC101307124 [Fragaria vesca subsp. vesca]	-3.31808	4.49e-06	1.96496e-05	yes	down		maker-Fvb6-1-augustus-gene-168.45	PREDICTED: uncharacterized protein LOC101296120 [Fragaria vesca subsp. vesca]	1.579	2.74601e-35	5.70235e-34	yes	up
maker-Fvb2-3-augustus-gene-182.28	PREDICTED: uncharacterized protein LOC101299254 [Fragaria vesca subsp. vesca]	-1.10426	2.12e-11	1.53877e-10	yes	down		maker-Fvb3-4-snap-gene-187.51	PREDICTED: expansin-A12 [Fragaria vesca subsp. vesca]	1.25765	2.37172e-17	2.48764e-16	yes	up
maker-Fvb1-1-augustus-gene-93.38	PREDICTED: probable WRKY transcription factor 47 isoform X1 [Fragaria vesca subsp. vesca]	-1.30418	6.03e-08	3.2552e-07	yes	down		maker-Fvb5-4-snap-gene-79.48	PREDICTED: nudix hydrolase 18, mitochondrial-like [Fragaria vesca subsp. vesca]	1.11704	7.65594e-69	3.2696e-67	yes	up
maker-Fvb1-2-snap-gene-235.14	PREDICTED: nudix hydrolase 18, mitochondrial-like [Fragaria vesca subsp. vesca]	-2.97952	8.67e-10	5.56447e-09	yes	down		augustus_masked-Fvb7-2-processed-gene-256.4	PREDICTED: ethylene-responsive transcription factor ERF105-like [Fragaria vesca subsp. vesca]	4.28817	6.57844e-259	2.04069e-256	yes	up
augustus_masked-Fvb3-1-processed-gene-292.12	hypothetical protein RchiOBHm_Chr5g0014631 [Rosa chinensis]	-1.93777	2.26e-13	1.88671e-12	yes	down		maker-Fvb6-2-augustus-gene-267.55	PREDICTED: cytochrome P450 714C2-like [Fragaria vesca subsp. vesca]	1.96772	1.0496e-49	3.1367e-48	yes	up
maker-Fvb6-2-augustus-gene-1.48	PREDICTED: serine/threonine-protein kinase HT1 isoform X2 [Fragaria vesca subsp. vesca]	-1.00634	8.11e-40	1.92316e-38	yes	down		maker-Fvb4-2-snap-gene-231.33	PREDICTED: malate dehydrogenase [Fragaria vesca subsp. vesca]	1.16752	4.76851e-64	1.88126e-62	yes	up
MSTRG.57514	PREDICTED: uncharacterized protein LOC101304885 [Fragaria vesca subsp. vesca]	-1.68291	0.0205523	0.0471925	yes	down		augustus_masked-Fvb4-1-processed-gene-141.10	Fra a 2 allergen [Fragaria x ananassa]	2.49981	8.03188e-46	2.20465e-44	yes	up
maker-Fvb6-2-snap-gene-301.37	PREDICTED: uncharacterized protein LOC101304792 [Fragaria vesca subsp. vesca]	-1.21377	6.11e-28	1.00481e-26	yes	down		MSTRG.22381	PREDICTED: cell wall protein DAN4-like [Pyrus x bretschneideri]	1.02769	4.59516e-16	4.48915e-15	yes	up
MSTRG.25782	uncharacterized protein LOC112177693 [Rosa chinensis]	-1.86919	0.00023173	0.000794518	yes	down		maker-Fvb3-3-augustus-gene-19.41	PREDICTED: GDSL esterase/lipase At1g29670-like [Fragaria vesca subsp. vesca]	1.98916	1.10496e-63	4.34035e-62	yes	up
maker-Fvb6-3-snap-gene-18.65	PREDICTED: cysteine-rich receptor-like protein kinase 42 [Fragaria vesca subsp. vesca]	-3.57146	8.1e-38	1.81323e-36	yes	down		maker-Fvb3-3-augustus-gene-255.28	PREDICTED: probable protein phosphatase 2C 25 [Fragaria vesca subsp. vesca]	2.54332	3.51001e-70	1.52783e-68	yes	up
maker-Fvb3-4-augustus-gene-207.39	PREDICTED: cytochrome P450 CYP72A219-like [Fragaria vesca subsp. vesca]	-1.39983	1.49e-60	5.52278e-59	yes	down		augustus_masked-Fvb7-2-processed-gene-244.14	PREDICTED: RING-H2 finger protein ATL66 [Fragaria vesca subsp. vesca]	1.45037	3.03427e-15	2.83874e-14	yes	up
maker-Fvb6-2-augustus-gene-155.21	PREDICTED: growth-regulating factor 3 [Fragaria vesca subsp. vesca]	-2.03189	2.02e-16	2.01419e-15	yes	down		augustus_masked-Fvb3-4-processed-gene-97.5	hypothetical protein RchiOBHm_Chr5g0057831 [Rosa chinensis]	1.67691	0.00696659	0.0179989	yes	up
maker-Fvb3-3-augustus-gene-3.48	PREDICTED: protein ODORANT1-like [Fragaria vesca subsp. vesca]	-2.77247	4.64e-17	4.78583e-16	yes	down		maker-Fvb3-2-snap-gene-81.54	G-type lectin S-receptor-like serine/threonine-protein kinase At1g67520 [Rosa chinensis]	1.77849	5.8743e-83	3.14852e-81	yes	up
augustus_masked-Fvb2-1-processed-gene-259.18	PREDICTED: elongation of fatty acids protein 3-like [Fragaria vesca subsp. vesca]	-1.07126	4.95e-05	0.000187981	yes	down		augustus_masked-Fvb6-4-processed-gene-215.8	PREDICTED: probable WRKY transcription factor 40 [Fragaria vesca subsp. vesca]	1.45197	6.37069e-10	4.12837e-09	yes	up
maker-Fvb6-4-augustus-gene-43.52	PREDICTED: uncharacterized protein LOC105352058 [Fragaria vesca subsp. vesca]	-1.47031	2.73e-12	2.11193e-11	yes	down		augustus_masked-Fvb4-4-processed-gene-38.9	PREDICTED: uncharacterized protein LOC105351132 [Fragaria vesca subsp. vesca]	2.01438	4.07463e-12	3.11201e-11	yes	up
maker-Fvb1-3-snap-gene-8.44	PREDICTED: cysteine-rich receptor-like protein kinase 7 isoform X2 [Fragaria vesca subsp. vesca]	-2.13383	7.43e-50	2.22648e-48	yes	down		augustus_masked-Fvb6-4-processed-gene-70.7	PREDICTED: CBL-interacting serine/threonine-protein kinase 14-like [Fragaria vesca subsp. vesca]	1.75586	1.10436e-33	2.17987e-32	yes	up
maker-Fvb3-1-augustus-gene-57.19	PREDICTED: abscisic acid 8&apos;-hydroxylase 2 [Fragaria vesca subsp. vesca]	-3.95737	1.23e-16	1.24058e-15	yes	down		maker-Fvb4-3-snap-gene-290.71	PREDICTED: protein NRT1/ PTR FAMILY 5.2-like [Fragaria vesca subsp. vesca]	1.15981	1.75884e-08	1.00478e-07	yes	up
maker-Fvb1-2-augustus-gene-64.50	PREDICTED: peroxiredoxin Q, chloroplastic [Fragaria vesca subsp. vesca]	-1.51363	1.87e-155	2.41399e-153	yes	down		maker-Fvb4-2-snap-gene-96.43	PREDICTED: DAZ-associated protein 1-like [Fragaria vesca subsp. vesca]	1.37196	1.48638e-07	7.70857e-07	yes	up
maker-Fvb3-4-snap-gene-27.76	PREDICTED: insulin-degrading enzyme-like [Fragaria vesca subsp. vesca]	-1.19403	6.4e-06	2.74638e-05	yes	down		augustus_masked-Fvb5-4-processed-gene-80.13	PREDICTED: U-box domain-containing protein 21-like [Fragaria vesca subsp. vesca]	3.6418	1.41223e-08	8.14265e-08	yes	up
maker-Fvb1-4-augustus-gene-41.49	PREDICTED: peroxiredoxin Q, chloroplastic [Fragaria vesca subsp. vesca]	-2.06849	1.41e-301	5.66561e-299	yes	down		maker-Fvb2-2-augustus-gene-6.48	PREDICTED: tetratricopeptide repeat protein 7B [Fragaria vesca subsp. vesca]	1.3905	0.0161008	0.0380215	yes	up
augustus_masked-Fvb1-2-processed-gene-233.6	uncharacterized protein LOC112195238 [Rosa chinensis]	-4.49455	1.36e-07	7.0633e-07	yes	down		snap_masked-Fvb7-1-processed-gene-261.40	PREDICTED: RING-H2 finger protein ATL66 [Fragaria vesca subsp. vesca]	2.39644	1.58083e-18	1.75813e-17	yes	up
maker-Fvb6-1-augustus-gene-364.50	PREDICTED: phosphoenolpyruvate carboxylase kinase 1-like [Fragaria vesca subsp. vesca]	-1.01398	2.09e-05	8.35486e-05	yes	down		maker-Fvb3-4-augustus-gene-29.42	PREDICTED: root phototropism protein 2 [Fragaria vesca subsp. vesca]	3.52061	1.03824e-91	6.35011e-90	yes	up
MSTRG.24041	PREDICTED: zinc finger protein CONSTANS-LIKE 7 [Fragaria vesca subsp. vesca]	-3.19014	2.4e-252	7.17656e-250	yes	down		augustus_masked-Fvb5-1-processed-gene-295.11	PREDICTED: uncharacterized protein LOC101306050 [Fragaria vesca subsp. vesca]	3.58078	5.35069e-20	6.37473e-19	yes	up
maker-Fvb4-4-augustus-gene-92.35	PREDICTED: uncharacterized protein LOC101302246 [Fragaria vesca subsp. vesca]	-1.00678	2.24e-39	5.25103e-38	yes	down		maker-Fvb7-2-augustus-gene-246.67	PREDICTED: transcription factor SCREAM2 isoform X1 [Fragaria vesca subsp. vesca]	5.83701	6.00635e-06	2.58769e-05	yes	up
maker-Fvb4-3-augustus-gene-295.44	meiotic recombination protein DMC1 homolog [Rosa chinensis]	-1.00788	1.27e-34	2.59567e-33	yes	down		maker-Fvb5-3-augustus-gene-7.36	PREDICTED: E3 ubiquitin-protein ligase MARCH2-like [Fragaria vesca subsp. vesca]	1.79023	7.83994e-25	1.14411e-23	yes	up
maker-Fvb4-1-snap-gene-181.63	PREDICTED: MLP-like protein 43 [Fragaria vesca subsp. vesca]	-1.41225	4.75e-116	3.92356e-114	yes	down		augustus_masked-Fvb6-3-processed-gene-303.13	PREDICTED: protein NUCLEAR FUSION DEFECTIVE 4-like [Fragaria vesca subsp. vesca]	1.52137	0.000197969	0.000686376	yes	up
MSTRG.58910	PREDICTED: extensin-3-like [Fragaria vesca subsp. vesca]	-1.01615	5.2e-59	1.87141e-57	yes	down		maker-Fvb2-2-snap-gene-154.38	PREDICTED: auxin-induced protein 15A-like [Fragaria vesca subsp. vesca]	1.35441	7.30757e-14	6.29627e-13	yes	up
augustus_masked-Fvb2-4-processed-gene-176.12	PREDICTED: basic 7S globulin 2-like [Fragaria vesca subsp. vesca]	-1.78702	1.22e-07	6.38234e-07	yes	down		MSTRG.44349	putative phosphate-induced protein [Rosa chinensis]	3.07334	6.76252e-05	0.00025177	yes	up
maker-Fvb1-1-snap-gene-201.53	PREDICTED: uncharacterized protein LOC101301400 [Fragaria vesca subsp. vesca]	-1.14733	4.07e-19	4.65418e-18	yes	down		maker-Fvb5-3-augustus-gene-169.36	PREDICTED: transcription factor MYB1R1 [Fragaria vesca subsp. vesca]	1.13417	6.06119e-30	1.06732e-28	yes	up
maker-Fvb6-2-augustus-gene-86.33	PREDICTED: tyrosine aminotransferase-like isoform X1 [Fragaria vesca subsp. vesca]	-1.65791	0.00160658	0.00475065	yes	down		maker-Fvb3-3-augustus-gene-263.41	PREDICTED: expansin-A4-like [Fragaria vesca subsp. vesca]	2.4684	1.20013e-231	3.20675e-229	yes	up
maker-Fvb5-3-augustus-gene-34.39	PREDICTED: phosphoribosylaminoimidazole-succinocarboxamide synthase, chloroplastic isoform X1 [Fragaria vesca subsp. vesca]	-1.16358	1.46e-19	1.69462e-18	yes	down		maker-Fvb5-1-augustus-gene-54.49	telomere length regulation protein TEL2 homolog isoform X1 [Rosa chinensis]	1.46283	1.50023e-06	6.95744e-06	yes	up
MSTRG.35696	PREDICTED: uncharacterized protein LOC101292020 [Fragaria vesca subsp. vesca]	-1.38062	4.64e-34	9.28455e-33	yes	down		augustus_masked-Fvb2-4-processed-gene-159.17	PREDICTED: serine carboxypeptidase-like 50 [Fragaria vesca subsp. vesca]	1.03799	0.00711564	0.0183495	yes	up
augustus_masked-Fvb7-4-processed-gene-163.3	PREDICTED: protein NUCLEAR FUSION DEFECTIVE 4-like isoform X1 [Fragaria vesca subsp. vesca]	-3.01088	3.18e-20	3.83742e-19	yes	down		snap_masked-Fvb5-1-processed-gene-51.40	PREDICTED: mitochondrial phosphate carrier protein 2, mitochondrial [Fragaria vesca subsp. vesca]	1.03336	1.33118e-21	1.7072e-20	yes	up
maker-Fvb7-2-augustus-gene-273.60	PREDICTED: homeobox-leucine zipper protein HDG1 isoform X1 [Fragaria vesca subsp. vesca]	-4.54621	0.00560136	0.014773	yes	down		maker-Fvb3-1-snap-gene-278.63	PREDICTED: TMV resistance protein N-like [Fragaria vesca subsp. vesca]	4.58634	0.0176242	0.0412123	yes	up
maker-Fvb7-4-augustus-gene-6.49	PREDICTED: two-component response regulator-like APRR5 [Fragaria vesca subsp. vesca]	-3.27605	0	0	yes	down		maker-Fvb4-1-augustus-gene-115.33	PREDICTED: stem-specific protein TSJT1 isoform X2 [Fragaria vesca subsp. vesca]	1.99717	1.22503e-149	1.48946e-147	yes	up
augustus_masked-Fvb3-1-processed-gene-105.0	PREDICTED: arogenate dehydratase/prephenate dehydratase 6, chloroplastic [Fragaria vesca subsp. vesca]	-1.58227	3.21e-16	3.17034e-15	yes	down		MSTRG.14914	--	2.11229	4.25456e-10	2.79668e-09	yes	up
maker-Fvb1-2-augustus-gene-39.74	PREDICTED: SPX domain-containing protein 1-like [Fragaria vesca subsp. vesca]	-1.6216	7.55e-80	3.80285e-78	yes	down		maker-Fvb4-1-augustus-gene-136.42	PREDICTED: small heat shock protein, chloroplastic-like [Fragaria vesca subsp. vesca]	1.4066	8.11229e-05	0.000298392	yes	up
maker-Fvb5-3-augustus-gene-51.14	PREDICTED: uncharacterized protein At5g65660-like [Fragaria vesca subsp. vesca]	-1.79378	0.0198837	0.0458456	yes	down		maker-Fvb3-4-snap-gene-258.56	PREDICTED: shikimate O-hydroxycinnamoyltransferase-like [Fragaria vesca subsp. vesca]	1.4082	2.3337e-181	3.9512e-179	yes	up
snap_masked-Fvb3-2-processed-gene-272.22	PREDICTED: asparagine synthetase [glutamine-hydrolyzing] [Fragaria vesca subsp. vesca]	-1.38562	0.00014415	0.000510607	yes	down		MSTRG.244	PREDICTED: uncharacterized protein LOC101300576 isoform X3 [Fragaria vesca subsp. vesca]	1.79885	5.32842e-69	2.28746e-67	yes	up
maker-Fvb2-1-augustus-gene-235.52	PREDICTED: uncharacterized protein LOC101311820 [Fragaria vesca subsp. vesca]	-1.03056	1.6e-16	1.60906e-15	yes	down		augustus_masked-Fvb2-3-processed-gene-209.1	PREDICTED: uncharacterized protein LOC105349590 [Fragaria vesca subsp. vesca]	2.65143	2.20575e-18	2.43568e-17	yes	up
maker-Fvb2-4-augustus-gene-211.35	PREDICTED: uncharacterized protein LOC101297404 [Fragaria vesca subsp. vesca]	-3.3057	1.3e-33	2.56629e-32	yes	down		maker-Fvb2-2-augustus-gene-5.46	PREDICTED: aspartic proteinase-like protein 2 isoform X1 [Fragaria vesca subsp. vesca]	1.5604	4.23959e-157	5.52556e-155	yes	up
maker-Fvb5-4-augustus-gene-15.33	PREDICTED: BTB/POZ domain-containing protein At1g63850 [Fragaria vesca subsp. vesca]	-1.10132	2.99e-07	1.49668e-06	yes	down		maker-Fvb7-2-augustus-gene-29.40	PREDICTED: probable aquaporin TIP1-2 [Fragaria vesca subsp. vesca]	1.07862	2.03475e-05	8.16397e-05	yes	up
maker-Fvb3-3-augustus-gene-12.43	PREDICTED: DEAD-box ATP-dependent RNA helicase 1 [Fragaria vesca subsp. vesca]	-1.07327	4.3e-05	0.000164613	yes	down		maker-Fvb2-3-augustus-gene-114.42	PREDICTED: endochitinase 2-like [Fragaria vesca subsp. vesca]	1.19835	0.000111049	0.000400086	yes	up
MSTRG.60697	PREDICTED: LOW QUALITY PROTEIN: probable isoleucine--tRNA ligase, cytoplasmic [Fragaria vesca subsp. vesca]	-2.24299	0.0165298	0.0389111	yes	down		snap_masked-Fvb1-4-processed-gene-18.29	PREDICTED: jacalin-related lectin 3-like isoform X1 [Fragaria vesca subsp. vesca]	1.27817	9.18247e-05	0.000335183	yes	up
augustus_masked-Fvb5-4-processed-gene-101.9	PREDICTED: LRR receptor-like serine/threonine-protein kinase EFR [Fragaria vesca subsp. vesca]	-3.09029	9e-20	1.0569e-18	yes	down		maker-Fvb5-1-augustus-gene-272.24	PREDICTED: purine permease 3-like [Fragaria vesca subsp. vesca]	1.11369	1.39874e-10	9.5327e-10	yes	up
maker-Fvb4-2-augustus-gene-130.32	PREDICTED: DNA repair protein REV1 [Fragaria vesca subsp. vesca]	-1.0199	0.00676011	0.0175189	yes	down		snap_masked-Fvb5-3-processed-gene-38.22	PREDICTED: putative DNA-binding protein ESCAROLA [Fragaria vesca subsp. vesca]	4.78531	0.00182597	0.00534766	yes	up
maker-Fvb4-3-augustus-gene-24.59	PREDICTED: uncharacterized protein At4g22758 [Fragaria vesca subsp. vesca]	-1.33586	1.67e-31	3.07134e-30	yes	down		maker-Fvb6-3-augustus-gene-86.49	PREDICTED: 1-aminocyclopropane-1-carboxylate oxidase [Fragaria vesca subsp. vesca]	2.16919	2.86487e-281	1.00194e-278	yes	up
maker-Fvb3-2-snap-gene-2.69	PREDICTED: ABC transporter B family member 9 [Fragaria vesca subsp. vesca]	-1.43407	0.000195943	0.000679897	yes	down		augustus_masked-Fvb5-3-processed-gene-161.6	PREDICTED: flavonol synthase 3-like [Fragaria vesca subsp. vesca]	1.21449	2.83563e-05	0.000111506	yes	up
maker-Fvb7-3-snap-gene-112.66	PREDICTED: pentatricopeptide repeat-containing protein PNM1, mitochondrial-like [Fragaria vesca subsp. vesca]	-1.30291	0.0156929	0.0371707	yes	down		snap_masked-Fvb4-4-processed-gene-15.47	PREDICTED: probable xyloglucan endotransglucosylase/hydrolase protein 33 [Fragaria vesca subsp. vesca]	1.58178	8.0892e-09	4.77503e-08	yes	up
maker-Fvb3-3-snap-gene-113.57	PREDICTED: putative beta-glucosidase 41 [Fragaria vesca subsp. vesca]	-1.54691	1.12e-05	4.64287e-05	yes	down		snap_masked-Fvb7-3-processed-gene-248.12	PREDICTED: E3 ubiquitin-protein ligase RING1-like isoform X2 [Fragaria vesca subsp. vesca]	2.44636	1.41918e-15	1.35203e-14	yes	up
maker-Fvb6-4-augustus-gene-42.39	PREDICTED: histidine-containing phosphotransfer protein 1-like [Fragaria vesca subsp. vesca]	-1.13624	0.0203477	0.0467797	yes	down		maker-Fvb6-1-augustus-gene-61.43	putative EXPERA domain-containing protein [Rosa chinensis]	1.93127	0.0173783	0.0406987	yes	up
maker-Fvb2-3-augustus-gene-226.42	PREDICTED: cleavage and polyadenylation specificity factor subunit 6 [Fragaria vesca subsp. vesca]	-2.06681	3.64e-06	1.60814e-05	yes	down		maker-Fvb2-1-augustus-gene-229.37	PREDICTED: uncharacterized protein LOC101296545 [Fragaria vesca subsp. vesca]	1.87067	7.85444e-26	1.19273e-24	yes	up
maker-Fvb1-3-snap-gene-64.49	flavanone 3-hydroxylase [Fragaria x ananassa]	-2.72144	1.09e-51	3.3833e-50	yes	down		snap_masked-Fvb4-3-processed-gene-133.44	hypothetical protein RchiOBHm_Chr4g0423511 [Rosa chinensis]	1.07397	1.02091e-12	8.149e-12	yes	up
MSTRG.58874	PREDICTED: calmodulin-binding receptor-like cytoplasmic kinase 2 [Fragaria vesca subsp. vesca]	-1.15679	1.61e-06	7.41407e-06	yes	down		augustus_masked-Fvb3-4-processed-gene-49.2	PREDICTED: 18.1 kDa class I heat shock protein-like [Fragaria vesca subsp. vesca]	2.87252	6.86003e-107	5.1101e-105	yes	up
maker-Fvb6-4-snap-gene-193.38	histidine--tRNA ligase, chloroplastic/mitochondrial [Rosa chinensis]	-1.96862	1.32e-12	1.04815e-11	yes	down		maker-Fvb6-2-augustus-gene-89.28	PREDICTED: proline-rich protein 2-like [Fragaria vesca subsp. vesca]	1.36151	4.02894e-06	1.77339e-05	yes	up
MSTRG.15309	PREDICTED: dehydrogenase/reductase SDR family member 12 [Fragaria vesca subsp. vesca]	-1.16523	2.7e-55	9.0431e-54	yes	down		augustus_masked-Fvb5-4-processed-gene-250.14	PREDICTED: uncharacterized protein LOC101306050 [Fragaria vesca subsp. vesca]	5.52439	0.000420979	0.00138454	yes	up
maker-Fvb5-1-augustus-gene-36.55	PREDICTED: RING-H2 finger protein ATL48 [Fragaria vesca subsp. vesca]	-1.20927	0.00088766	0.00275728	yes	down		maker-Fvb5-1-augustus-gene-103.58	PREDICTED: uncharacterized protein LOC101292121 [Fragaria vesca subsp. vesca]	2.02461	8.49093e-08	4.51678e-07	yes	up
maker-Fvb5-4-snap-gene-199.49	PREDICTED: queuine tRNA-ribosyltransferase subunit QTRTD1-like [Fragaria vesca subsp. vesca]	-1.33964	0.0091342	0.022974	yes	down		maker-Fvb5-1-augustus-gene-86.53	PREDICTED: replication protein A 70 kDa DNA-binding subunit B [Fragaria vesca subsp. vesca]	1.20686	0.00889891	0.0224489	yes	up
maker-Fvb5-3-augustus-gene-159.33	PREDICTED: beta-amylase 3, chloroplastic [Fragaria vesca subsp. vesca]	-3.68817	0	0	yes	down		MSTRG.31535	PREDICTED: proline-rich protein 4 [Prunus mume]	1.54082	2.00179e-92	1.23855e-90	yes	up
maker-Fvb6-1-augustus-gene-154.43	PREDICTED: DCC family protein At1g52590, chloroplastic isoform X1 [Fragaria vesca subsp. vesca]	-1.67148	6.43e-186	1.13961e-183	yes	down		maker-Fvb1-2-augustus-gene-95.40	PREDICTED: probable esterase PIR7A isoform X1 [Fragaria vesca subsp. vesca]	1.2536	0.00587836	0.0154374	yes	up
maker-Fvb6-4-snap-gene-39.59	PREDICTED: anthocyanidin 3-O-glucoside 2&apos;&apos;-O-glucosyltransferase-like [Fragaria vesca subsp. vesca]	-1.28863	8.37e-43	2.13859e-41	yes	down		maker-Fvb6-3-augustus-gene-267.38	PREDICTED: uncharacterized protein LOC101314767 [Fragaria vesca subsp. vesca]	1.11781	4.76552e-05	0.000181494	yes	up
maker-Fvb4-3-snap-gene-295.50	PREDICTED: putative F-box protein PP2-B12 [Fragaria vesca subsp. vesca]	-1.10335	7.24e-20	8.55564e-19	yes	down		maker-Fvb1-4-snap-gene-86.70	GPI-anchored CFEM domain protein ARB_01545-like isoform X1 [Prunus avium]	2.32965	0.000901396	0.00279583	yes	up
augustus_masked-Fvb7-3-processed-gene-33.8	PREDICTED: uncharacterized protein LOC101298945 [Fragaria vesca subsp. vesca]	-6.36427	5.18e-27	8.22686e-26	yes	down		maker-Fvb5-2-augustus-gene-247.23	PREDICTED: E3 ubiquitin-protein ligase MARCH2-like [Fragaria vesca subsp. vesca]	1.75516	1.91873e-33	3.75136e-32	yes	up
maker-Fvb7-3-snap-gene-118.56	PREDICTED: transcription factor EGL1 [Fragaria vesca subsp. vesca]	-1.92306	1.17e-29	2.03757e-28	yes	down		MSTRG.57446	protein FAR1-RELATED SEQUENCE 5-like [Rosa chinensis]	1.04494	1.17112e-06	5.50358e-06	yes	up
MSTRG.65223	cytochrome P450 71D9-like [Rosa chinensis]	-1.16512	3.39e-05	0.000131754	yes	down		maker-Fvb7-4-augustus-gene-88.37	PREDICTED: protein ATAF2-like [Fragaria vesca subsp. vesca]	1.59637	0.000103531	0.000374682	yes	up
maker-Fvb7-2-snap-gene-299.49	probable LRR receptor-like serine/threonine-protein kinase At1g51880 [Rosa chinensis]	-2.69695	2.08e-306	8.83671e-304	yes	down		augustus_masked-Fvb7-3-processed-gene-82.10	hypothetical protein RchiOBHm_Chr1g0363961 [Rosa chinensis]	1.96445	0.00576779	0.0151686	yes	up
MSTRG.14924	lipoamide acyltransferase component of branched-chain alpha-keto acid dehydrogenase complex, mitochondrial isoform X3 [Rosa chinensis]	-1.81043	6.3e-05	0.000235591	yes	down		maker-Fvb7-4-augustus-gene-149.43	PREDICTED: pectin acetylesterase 3 isoform X2 [Fragaria vesca subsp. vesca]	3.92988	2.37423e-05	9.44903e-05	yes	up
maker-Fvb4-4-augustus-gene-11.47	PREDICTED: TMV resistance protein N-like [Fragaria vesca subsp. vesca]	-1.35462	0.00451372	0.0121905	yes	down		maker-Fvb4-3-augustus-gene-52.49	PREDICTED: zinc finger protein CONSTANS-LIKE 16 [Fragaria vesca subsp. vesca]	2.64843	3.99369e-54	1.30361e-52	yes	up
maker-Fvb6-3-snap-gene-18.75	PREDICTED: cysteine-rich receptor-like protein kinase 42 [Fragaria vesca subsp. vesca]	-3.82087	3.23e-22	4.24241e-21	yes	down		maker-Fvb4-3-augustus-gene-75.27	PREDICTED: extensin-2-like, partial [Fragaria vesca subsp. vesca]	2.01017	5.87614e-10	3.82074e-09	yes	up
maker-Fvb6-4-snap-gene-36.64	PREDICTED: GDP-mannose 3,5-epimerase 2 [Fragaria vesca subsp. vesca]	-1.2269	3.88e-102	2.75133e-100	yes	down		maker-Fvb4-2-augustus-gene-78.37	inactive leucine-rich repeat receptor-like protein kinase CORYNE [Rosa chinensis]	3.09405	0	0	yes	up
maker-Fvb1-3-augustus-gene-159.30	PREDICTED: replication factor C subunit 3 [Fragaria vesca subsp. vesca]	-1.39256	2.12e-05	8.49955e-05	yes	down		augustus_masked-Fvb6-1-processed-gene-193.8	PREDICTED: uncharacterized protein LOC101304329 [Fragaria vesca subsp. vesca]	1.7197	4.64921e-06	2.03169e-05	yes	up
MSTRG.10633	proline-rich receptor-like protein kinase PERK2 [Prunus avium]	-1.93604	1.87e-36	4.03341e-35	yes	down		augustus_masked-Fvb1-1-processed-gene-120.1	PREDICTED: ABC transporter G family member 5 [Fragaria vesca subsp. vesca]	1.38768	1.03963e-07	5.48014e-07	yes	up
maker-Fvb7-4-snap-gene-105.58	PREDICTED: uncharacterized protein At5g41620 [Fragaria vesca subsp. vesca]	-1.21635	2e-06	9.13848e-06	yes	down		MSTRG.21505	PREDICTED: probable LRR receptor-like serine/threonine-protein kinase At3g47570 [Fragaria vesca subsp. vesca]	2.09048	1.22698e-18	1.37177e-17	yes	up
maker-Fvb3-3-snap-gene-249.40	NTR, partial [Malus zumi]	-1.00415	1.51e-37	3.34784e-36	yes	down		maker-Fvb5-1-augustus-gene-180.28	PREDICTED: zinc finger CCCH domain-containing protein 53 isoform X2 [Fragaria vesca subsp. vesca]	2.34005	0.00328888	0.00914423	yes	up
maker-Fvb5-1-augustus-gene-2.39	PREDICTED: bifunctional dTDP-4-dehydrorhamnose 3,5-epimerase/dTDP-4-dehydrorhamnose reductase [Fragaria vesca subsp. vesca]	-1.52377	5.95e-79	2.96179e-77	yes	down		maker-Fvb6-3-snap-gene-303.45	PREDICTED: heparan-alpha-glucosaminide N-acetyltransferase-like [Fragaria vesca subsp. vesca]	3.19527	5.40006e-06	2.34163e-05	yes	up
maker-Fvb5-2-augustus-gene-111.68	PREDICTED: transcription factor WER-like isoform X1 [Fragaria vesca subsp. vesca]	-1.2704	1.95e-05	7.83844e-05	yes	down		maker-Fvb1-4-snap-gene-139.32	PREDICTED: zeaxanthin epoxidase, chloroplastic-like [Fragaria vesca subsp. vesca]	5.32849	8.57855e-11	5.94305e-10	yes	up
maker-Fvb2-1-snap-gene-249.59	PREDICTED: thaumatin-like protein 1b [Fragaria vesca subsp. vesca]	-2.26031	2.6e-69	1.12053e-67	yes	down		maker-Fvb6-3-snap-gene-36.96	PREDICTED: F-box protein At5g39250 [Fragaria vesca subsp. vesca]	1.1259	0.000198628	0.000688273	yes	up
maker-Fvb3-3-augustus-gene-290.48	PREDICTED: probable acyl-activating enzyme 18, peroxisomal [Fragaria vesca subsp. vesca]	-2.27099	1.65e-225	4.14831e-223	yes	down		maker-Fvb3-4-augustus-gene-213.55	PREDICTED: putative serine/threonine-protein kinase [Fragaria vesca subsp. vesca]	1.08129	4.38781e-07	2.16077e-06	yes	up
maker-Fvb7-3-snap-gene-163.27	PREDICTED: protein ECERIFERUM 1-like [Fragaria vesca subsp. vesca]	-2.14132	1.13e-05	4.67416e-05	yes	down		maker-Fvb6-1-augustus-gene-284.34	PREDICTED: serine/threonine-protein kinase CDL1 [Fragaria vesca subsp. vesca]	1.1289	5.98606e-21	7.45119e-20	yes	up
maker-Fvb6-3-augustus-gene-184.19	PREDICTED: probable 2-oxoglutarate-dependent dioxygenase AOP1 [Fragaria vesca subsp. vesca]	-1.49281	0.000617906	0.00197497	yes	down		augustus_masked-Fvb4-4-processed-gene-144.6	PREDICTED: UDP-glucuronate 4-epimerase 6 [Fragaria vesca subsp. vesca]	1.07843	1.77316e-35	3.70336e-34	yes	up
MSTRG.27757	PREDICTED: uncharacterized protein LOC101307368 [Fragaria vesca subsp. vesca]	-1.21869	2.47e-92	1.52818e-90	yes	down		snap_masked-Fvb1-1-processed-gene-97.32	PREDICTED: calcium-transporting ATPase 8, plasma membrane-type-like [Fragaria vesca subsp. vesca]	3.62301	0.020267	0.0466118	yes	up
maker-Fvb2-4-augustus-gene-136.25	PREDICTED: protein YIF1B-A-like [Fragaria vesca subsp. vesca]	-4.2399	0.0171146	0.0401526	yes	down		maker-Fvb3-3-augustus-gene-209.17	PREDICTED: protein CHROMATIN REMODELING 20 [Fragaria vesca subsp. vesca]	1.87816	0.0018123	0.00531004	yes	up
maker-Fvb3-2-augustus-gene-239.27	PREDICTED: probable serine/threonine-protein kinase RLCKVII [Fragaria vesca subsp. vesca]	-1.02525	1.03e-22	1.38786e-21	yes	down		maker-Fvb6-2-snap-gene-335.44	PREDICTED: cell differentiation protein rcd1-like isoform X2 [Fragaria vesca subsp. vesca]	1.17415	0.0028592	0.00805717	yes	up
maker-Fvb7-4-snap-gene-122.37	PREDICTED: uncharacterized protein LOC105351746 isoform X1 [Fragaria vesca subsp. vesca]	-2.86013	0.000119536	0.000428497	yes	down		maker-Fvb7-2-augustus-gene-222.46	PREDICTED: caffeoylshikimate esterase-like [Fragaria vesca subsp. vesca]	1.04837	8.48373e-34	1.68191e-32	yes	up
maker-Fvb6-4-augustus-gene-89.36	PREDICTED: probable WRKY transcription factor 49 [Fragaria vesca subsp. vesca]	-2.83227	0.00598064	0.0156783	yes	down		maker-Fvb1-1-augustus-gene-185.31	PREDICTED: UDP-glycosyltransferase 84B2-like [Fragaria vesca subsp. vesca]	1.84344	0.00505418	0.0134861	yes	up
maker-Fvb6-4-augustus-gene-66.35	PREDICTED: uncharacterized protein LOC101296878 [Fragaria vesca subsp. vesca]	-2.22339	0.0106139	0.0262654	yes	down		maker-Fvb4-3-snap-gene-81.65	PREDICTED: universal stress protein A-like protein [Fragaria vesca subsp. vesca]	2.51094	3.16604e-132	3.15146e-130	yes	up
augustus_masked-Fvb2-2-processed-gene-13.17	PREDICTED: glutaredoxin-C6 [Fragaria vesca subsp. vesca]	-2.89794	2.53e-05	0.000100318	yes	down		maker-Fvb7-2-augustus-gene-216.44	PREDICTED: uncharacterized protein LOC101302215 isoform X1 [Fragaria vesca subsp. vesca]	1.58189	2.6243e-11	1.89201e-10	yes	up
maker-Fvb7-4-snap-gene-80.49	PREDICTED: chorismate synthase, chloroplastic isoform X1 [Fragaria vesca subsp. vesca]	-1.33013	3.65e-67	1.50913e-65	yes	down		maker-Fvb2-2-augustus-gene-16.41	PREDICTED: thermospermine synthase ACAULIS5 [Fragaria vesca subsp. vesca]	1.01838	4.79266e-34	9.57698e-33	yes	up
maker-Fvb5-3-augustus-gene-255.81	PREDICTED: probable membrane-associated kinase regulator 2 [Fragaria vesca subsp. vesca]	-2.90691	0.012226	0.0297684	yes	down		maker-Fvb5-1-snap-gene-128.48	PREDICTED: flavonol synthase 3-like [Fragaria vesca subsp. vesca]	3.42902	1.53583e-39	3.62096e-38	yes	up
MSTRG.47218	heme-binding-like protein At3g10130, chloroplastic [Rosa chinensis]	-1.85375	7.98e-163	1.10149e-160	yes	down		maker-Fvb4-1-augustus-gene-38.26	PREDICTED: protein SULFUR DEFICIENCY-INDUCED 2-like [Fragaria vesca subsp. vesca]	1.38643	1.15625e-05	4.78784e-05	yes	up
maker-Fvb6-1-augustus-gene-270.39	PREDICTED: kinesin-like protein KIF22 isoform X1 [Fragaria vesca subsp. vesca]	-1.12813	3.6e-59	1.30264e-57	yes	down		maker-Fvb5-2-augustus-gene-1.41	PREDICTED: acid beta-fructofuranosidase-like [Fragaria vesca subsp. vesca]	4.09339	1.04826e-29	1.83236e-28	yes	up
maker-Fvb3-1-augustus-gene-268.19	PREDICTED: ABC transporter C family member 12-like [Fragaria vesca subsp. vesca]	-1.04638	5.03e-24	7.13522e-23	yes	down		snap_masked-Fvb1-3-processed-gene-36.30	PREDICTED: putative transcription factor bHLH041 [Fragaria vesca subsp. vesca]	3.34208	1.05466e-13	9.004e-13	yes	up
maker-Fvb6-2-augustus-gene-239.65	PREDICTED: root phototropism protein 3-like [Fragaria vesca subsp. vesca]	-2.71219	0.000447703	0.00146524	yes	down		augustus_masked-Fvb3-1-processed-gene-170.7	PREDICTED: probable F-box protein At4g22030 [Fragaria vesca subsp. vesca]	5.73598	4.54283e-08	2.47993e-07	yes	up
maker-Fvb5-1-augustus-gene-69.64	PREDICTED: succinate dehydrogenase assembly factor 2, mitochondrial [Fragaria vesca subsp. vesca]	-1.32899	5.7e-28	9.3863e-27	yes	down		maker-Fvb6-2-snap-gene-223.55	PREDICTED: uncharacterized protein LOC101292730 [Fragaria vesca subsp. vesca]	4.5088	9.21881e-05	0.000336428	yes	up
maker-Fvb2-4-augustus-gene-126.33	PREDICTED: uncharacterized protein ycf39 [Fragaria vesca subsp. vesca]	-1.45261	2.79e-124	2.54159e-122	yes	down		maker-Fvb6-2-augustus-gene-324.57	PREDICTED: formimidoyltransferase-cyclodeaminase-like isoform X1 [Fragaria vesca subsp. vesca]	1.55117	4.93523e-07	2.4159e-06	yes	up
MSTRG.38327	PREDICTED: zinc finger MYM-type protein 1-like [Fragaria vesca subsp. vesca]	-1.55405	0.0126683	0.0307429	yes	down		maker-Fvb3-4-augustus-gene-219.28	PREDICTED: cytochrome P450 CYP749A22-like [Fragaria vesca subsp. vesca]	1.17677	0.000628678	0.00200663	yes	up
maker-Fvb4-1-snap-gene-30.34	PREDICTED: actin-related protein 2/3 complex subunit 2B isoform X1 [Fragaria vesca subsp. vesca]	-1.4751	0.00638559	0.0166402	yes	down		maker-Fvb5-2-snap-gene-27.58	PREDICTED: hydroquinone glucosyltransferase-like [Fragaria vesca subsp. vesca]	1.02642	4.18405e-10	2.75213e-09	yes	up
MSTRG.53001	PREDICTED: uncharacterized protein LOC101299504 [Fragaria vesca subsp. vesca]	-1.54871	0.0090333	0.022748	yes	down		augustus_masked-Fvb5-1-processed-gene-146.1	PREDICTED: disease resistance protein RPM1-like [Fragaria vesca subsp. vesca]	1.0221	0.00550676	0.0145582	yes	up
maker-Fvb3-3-augustus-gene-19.38	uncharacterized protein At2g29880-like [Rosa chinensis]	-1.33502	0.00888326	0.0224125	yes	down		maker-Fvb4-2-snap-gene-21.78	PREDICTED: purple acid phosphatase 7-like [Fragaria vesca subsp. vesca]	3.11672	0	0	yes	up
maker-Fvb5-3-snap-gene-219.36	hypothetical protein RchiOBHm_Chr7g0187041 [Rosa chinensis]	-1.03101	0.00161564	0.00477537	yes	down		augustus_masked-Fvb1-1-processed-gene-181.1	PREDICTED: subtilisin-like protease [Fragaria vesca subsp. vesca]	1.70611	7.75303e-06	3.28812e-05	yes	up
maker-Fvb6-1-snap-gene-25.60	uncharacterized protein LOC18784409 [Prunus persica]	-1.78943	3.58e-133	3.61465e-131	yes	down		augustus_masked-Fvb1-2-processed-gene-36.10	hypothetical protein RchiOBHm_Chr2g0089511 [Rosa chinensis]	4.71515	7.85305e-20	9.261e-19	yes	up
maker-Fvb6-3-snap-gene-435.92	PREDICTED: MATE efflux family protein 2, chloroplastic [Fragaria vesca subsp. vesca]	-1.38771	7.28e-121	6.37815e-119	yes	down		maker-Fvb1-2-augustus-gene-66.37	pectinesterase [Fragaria x ananassa]	1.36402	3.00088e-65	1.20542e-63	yes	up
maker-Fvb1-1-augustus-gene-164.37	PREDICTED: probable mannitol dehydrogenase [Fragaria vesca subsp. vesca]	-3.50096	3.59e-58	1.27464e-56	yes	down		maker-Fvb6-1-augustus-gene-134.37	PREDICTED: uncharacterized protein LOC101301403 [Fragaria vesca subsp. vesca]	3.89559	4.34233e-06	1.90448e-05	yes	up
maker-Fvb2-4-augustus-gene-38.34	PREDICTED: B3 domain-containing protein Os06g0194400-like isoform X2 [Fragaria vesca subsp. vesca]	-1.11261	6.1e-05	0.000228324	yes	down		maker-Fvb6-3-snap-gene-52.70	putative protein kinase RLK-Pelle-DLSV family [Rosa chinensis]	5.42696	2.6572e-13	2.21102e-12	yes	up
maker-Fvb7-4-snap-gene-70.27	PREDICTED: uncharacterized protein LOC105353024 [Fragaria vesca subsp. vesca]	-3.17938	3.87e-21	4.86617e-20	yes	down		augustus_masked-Fvb1-3-processed-gene-118.5	PREDICTED: uncharacterized protein At4g38062 [Fragaria vesca subsp. vesca]	1.4116	1.45605e-17	1.54114e-16	yes	up
maker-Fvb2-4-augustus-gene-46.31	PREDICTED: very-long-chain enoyl-CoA reductase-like [Fragaria vesca subsp. vesca]	-1.65674	2.7e-13	2.24495e-12	yes	down		maker-Fvb6-3-snap-gene-393.80	PREDICTED: transmembrane protein 87B-like [Fragaria vesca subsp. vesca]	1.11386	1.1254e-11	8.33589e-11	yes	up
maker-Fvb4-4-snap-gene-113.29	PREDICTED: sodium/hydrogen exchanger 2-like [Fragaria vesca subsp. vesca]	-3.3489	1.54e-42	3.91591e-41	yes	down		augustus_masked-Fvb3-1-processed-gene-37.1	PREDICTED: PRA1 family protein B1-like [Fragaria vesca subsp. vesca]	1.5384	4.766e-06	2.08013e-05	yes	up
maker-Fvb7-2-snap-gene-118.68	PREDICTED: somatic embryogenesis receptor kinase 1-like [Fragaria vesca subsp. vesca]	-1.57224	6.08e-32	1.13624e-30	yes	down		maker-Fvb1-4-augustus-gene-57.59	PREDICTED: zinc finger CCCH domain-containing protein 6 [Fragaria vesca subsp. vesca]	1.37939	2.3507e-05	9.36114e-05	yes	up
maker-Fvb3-4-augustus-gene-130.7	PREDICTED: uncharacterized protein LOC101310447 isoform X3 [Fragaria vesca subsp. vesca]	-1.12562	2.24e-19	2.58751e-18	yes	down		maker-Fvb7-3-snap-gene-117.31	PREDICTED: putative receptor-like protein kinase At3g47110 isoform X1 [Fragaria vesca subsp. vesca]	2.83356	3.9931e-17	4.13418e-16	yes	up
maker-Fvb4-2-snap-gene-88.29	PREDICTED: polygalacturonase At1g48100 [Fragaria vesca subsp. vesca]	-1.22117	1.53e-16	1.54201e-15	yes	down		maker-Fvb6-4-augustus-gene-309.61	PREDICTED: linolenate hydroperoxide lyase, chloroplastic [Fragaria vesca subsp. vesca]	1.32412	1.56954e-56	5.37912e-55	yes	up
maker-Fvb2-2-augustus-gene-4.54	PREDICTED: F-box-like/WD repeat-containing protein TBL1XR1 [Fragaria vesca subsp. vesca]	-1.03136	1.46e-06	6.80202e-06	yes	down		maker-Fvb3-3-augustus-gene-277.47	PREDICTED: WEB family protein At5g55860 [Fragaria vesca subsp. vesca]	1.05659	6.3401e-07	3.06404e-06	yes	up
maker-Fvb3-1-snap-gene-263.72	PREDICTED: fatty acid 2-hydroxylase 1-like [Fragaria vesca subsp. vesca]	-1.09951	4.81e-45	1.293e-43	yes	down		maker-Fvb5-3-augustus-gene-228.47	PREDICTED: acyl carrier protein 1, chloroplastic-like [Fragaria vesca subsp. vesca]	1.30486	1.42835e-47	4.08273e-46	yes	up
maker-Fvb4-4-augustus-gene-37.66	PREDICTED: ninja-family protein AFP2-like [Fragaria vesca subsp. vesca]	-3.05124	1.18e-94	7.64168e-93	yes	down		maker-Fvb4-4-augustus-gene-149.24	PREDICTED: outer envelope pore protein 16-1, chloroplastic-like [Fragaria vesca subsp. vesca]	1.46801	4.56671e-06	1.99728e-05	yes	up
MSTRG.45439	PREDICTED: uncharacterized protein LOC101308692 [Fragaria vesca subsp. vesca]	-1.96096	1.1e-16	1.1197e-15	yes	down		augustus_masked-Fvb6-3-processed-gene-378.5	PREDICTED: F-box/kelch-repeat protein At3g06240-like [Fragaria vesca subsp. vesca]	4.94355	3.04975e-45	8.24872e-44	yes	up
maker-Fvb4-3-snap-gene-162.35	uncharacterized protein LOC112196494 [Rosa chinensis]	-1.17228	5.42e-35	1.11761e-33	yes	down		maker-Fvb1-4-snap-gene-214.49	PREDICTED: probable ADP-ribosylation factor GTPase-activating protein AGD11 [Fragaria vesca subsp. vesca]	1.39224	1.27958e-15	1.22186e-14	yes	up
maker-Fvb6-2-snap-gene-269.70	PREDICTED: uncharacterized protein LOC101307034 [Fragaria vesca subsp. vesca]	-1.5704	7.19e-127	6.69979e-125	yes	down		maker-Fvb6-3-augustus-gene-292.41	PREDICTED: glucomannan 4-beta-mannosyltransferase 9-like [Fragaria vesca subsp. vesca]	1.56592	0.0077906	0.0199193	yes	up
maker-Fvb2-2-augustus-gene-18.50	PREDICTED: putative RNA methyltransferase At5g10620 isoform X1 [Fragaria vesca subsp. vesca]	-1.61471	2.37e-108	1.79184e-106	yes	down		MSTRG.17393	PREDICTED: CBL-interacting serine/threonine-protein kinase 11 [Fragaria vesca subsp. vesca]	3.22257	2.30977e-178	3.81095e-176	yes	up
MSTRG.61263	PREDICTED: LOW QUALITY PROTEIN: uncharacterized protein LOC101302880 [Fragaria vesca subsp. vesca]	-1.19464	3.82e-09	2.32801e-08	yes	down		snap_masked-Fvb6-4-processed-gene-76.21	PREDICTED: abscisic acid receptor PYL4 [Fragaria vesca subsp. vesca]	2.34143	7.22224e-29	1.22486e-27	yes	up
maker-Fvb1-2-augustus-gene-76.47	PREDICTED: alpha-mannosidase isoform X2 [Fragaria vesca subsp. vesca]	-1.25107	1.37e-10	9.3229e-10	yes	down		maker-Fvb7-4-augustus-gene-189.35	PREDICTED: uncharacterized protein LOC101309290 isoform X1 [Fragaria vesca subsp. vesca]	1.53894	1.75133e-177	2.86349e-175	yes	up
maker-Fvb5-1-augustus-gene-83.42	putative peptidase S49, protease IV, peptidase S49, SppA, ClpP/crotonase-like protein [Rosa chinensis]	-2.00495	0	0	yes	down		augustus_masked-Fvb3-2-processed-gene-88.5	hypothetical protein RchiOBHm_Chr5g0028161 [Rosa chinensis]	2.0766	0.000483691	0.00157494	yes	up
maker-Fvb1-2-augustus-gene-89.33	PREDICTED: probable small nuclear ribonucleoprotein Sm D2 isoform X2 [Fragaria vesca subsp. vesca]	-2.32236	2.18e-06	9.92245e-06	yes	down		maker-Fvb3-2-augustus-gene-20.57	PREDICTED: oxygen-evolving enhancer protein 3-2, chloroplastic [Fragaria vesca subsp. vesca]	1.04755	4.39394e-133	4.42722e-131	yes	up
maker-Fvb3-3-snap-gene-237.43	hypothetical protein RchiOBHm_Chr5g0065281 [Rosa chinensis]	-3.67417	2.12e-25	3.17338e-24	yes	down		snap_masked-Fvb7-2-processed-gene-109.18	PREDICTED: cyclic nucleotide-gated ion channel 1-like isoform X2 [Fragaria vesca subsp. vesca]	1.2601	2.78795e-08	1.55973e-07	yes	up
maker-Fvb2-2-augustus-gene-218.24	PREDICTED: uncharacterized protein LOC105350021 [Fragaria vesca subsp. vesca]	-1.74917	0.00761428	0.01951	yes	down		maker-Fvb4-3-snap-gene-143.43	PREDICTED: RING finger and CHY zinc finger domain-containing protein 1 [Fragaria vesca subsp. vesca]	1.38165	1.33587e-33	2.62596e-32	yes	up
maker-Fvb2-3-augustus-gene-16.36	PREDICTED: DIS3-like exonuclease 2 [Fragaria vesca subsp. vesca]	-1.021	1.07e-12	8.56419e-12	yes	down		snap_masked-Fvb2-4-processed-gene-3.6	PREDICTED: beta-galactosidase 13-like [Fragaria vesca subsp. vesca]	2.46258	0.0211474	0.0483664	yes	up
maker-Fvb7-1-augustus-gene-222.40	PREDICTED: expansin-A4-like [Fragaria vesca subsp. vesca]	-6.63156	9.77e-12	7.25938e-11	yes	down		maker-Fvb2-4-augustus-gene-243.59	PREDICTED: uncharacterized protein LOC101313473 [Fragaria vesca subsp. vesca]	4.70874	0.0125995	0.0305899	yes	up
maker-Fvb3-3-snap-gene-199.37	PREDICTED: P-loop NTPase domain-containing protein LPA1 homolog 2-like [Fragaria vesca subsp. vesca]	-1.04095	1.09e-12	8.68091e-12	yes	down		maker-Fvb3-2-augustus-gene-109.29	PREDICTED: probable protein phosphatase 2C 39 [Fragaria vesca subsp. vesca]	1.04318	1.15878e-29	2.02164e-28	yes	up
maker-Fvb3-2-augustus-gene-19.46	PREDICTED: (E,E)-alpha-farnesene synthase-like isoform X2 [Fragaria vesca subsp. vesca]	-1.15487	5.16e-42	1.29303e-40	yes	down		augustus_masked-Fvb1-2-processed-gene-102.2	PREDICTED: pectin acetylesterase 3 isoform X2 [Fragaria vesca subsp. vesca]	5.12782	6.46932e-05	0.000241439	yes	up
MSTRG.50194	replication protein A 70 kDa DNA-binding subunit B-like isoform X1 [Rosa chinensis]	-1.28902	1e-21	1.293e-20	yes	down		maker-Fvb2-3-snap-gene-68.73	PREDICTED: zinc finger CCCH domain-containing protein 20 [Fragaria vesca subsp. vesca]	3.56907	1.38584e-26	2.16844e-25	yes	up
maker-Fvb7-2-snap-gene-303.68	PREDICTED: uncharacterized protein LOC101314712 [Fragaria vesca subsp. vesca]	-1.55596	1.47e-15	1.39624e-14	yes	down		maker-Fvb2-1-augustus-gene-95.31	PREDICTED: heterodimeric geranylgeranyl pyrophosphate synthase small subunit, chloroplastic [Fragaria vesca subsp. vesca]	1.08313	2.51009e-22	3.311e-21	yes	up
maker-Fvb6-4-snap-gene-288.44	phytoene synthase protein [Fragaria x ananassa]	-1.26133	1.47e-105	1.08473e-103	yes	down		augustus_masked-Fvb7-4-processed-gene-55.4	PREDICTED: ribulose bisphosphate carboxylase/oxygenase activase, chloroplastic isoform X1 [Fragaria vesca subsp. vesca]	1.6639	9.74152e-263	3.04275e-260	yes	up
maker-Fvb6-1-augustus-gene-114.80	PREDICTED: CCAAT/enhancer-binding protein zeta [Fragaria vesca subsp. vesca]	-1.04552	0.00218361	0.00629876	yes	down		maker-Fvb3-4-augustus-gene-45.23	PREDICTED: probable N-acetyltransferase HLS1 [Fragaria vesca subsp. vesca]	3.20038	0.00180093	0.00527981	yes	up
maker-Fvb7-1-snap-gene-184.41	PREDICTED: protein SUPPRESSOR OF PHYA-105 1 [Fragaria vesca subsp. vesca]	-1.91992	2.54e-80	1.29597e-78	yes	down		maker-Fvb3-1-snap-gene-270.54	PREDICTED: linoleate 13S-lipoxygenase 3-1, chloroplastic-like [Fragaria vesca subsp. vesca]	1.49073	1.55817e-05	6.33513e-05	yes	up
maker-Fvb2-1-augustus-gene-140.35	PREDICTED: inorganic phosphate transporter 1-4-like [Fragaria vesca subsp. vesca]	-1.27756	8.51e-27	1.34309e-25	yes	down		MSTRG.35005	PREDICTED: leucine-rich repeat extensin-like protein 4 isoform X1 [Pyrus x bretschneideri]	1.46256	4.33862e-18	4.71445e-17	yes	up
MSTRG.23762	PREDICTED: nuclear pore complex protein NUP62 [Fragaria vesca subsp. vesca]	-1.85934	3.7e-40	8.8528e-39	yes	down		maker-Fvb3-2-augustus-gene-282.40	putative transcription factor bHLH family [Rosa chinensis]	1.26712	0.0208192	0.0477244	yes	up
maker-Fvb7-3-augustus-gene-146.33	PREDICTED: uncharacterized protein LOC101311511 isoform X1 [Fragaria vesca subsp. vesca]	-1.80626	2.16e-105	1.59053e-103	yes	down		maker-Fvb6-3-snap-gene-52.68	PREDICTED: G-type lectin S-receptor-like serine/threonine-protein kinase At4g27290 [Fragaria vesca subsp. vesca]	2.65711	1.29501e-38	2.96821e-37	yes	up
snap_masked-Fvb3-1-processed-gene-253.26	PREDICTED: chaperonin 60 subunit alpha 2, chloroplastic isoform X1 [Fragaria vesca subsp. vesca]	-1.36617	8.33e-20	9.80881e-19	yes	down		MSTRG.30178	putative RNA-directed DNA polymerase [Rosa chinensis]	1.63355	1.21199e-11	8.95676e-11	yes	up
MSTRG.59853	PREDICTED: short-chain dehydrogenase TIC 32, chloroplastic-like isoform X2 [Fragaria vesca subsp. vesca]	-3.76224	3.9e-22	5.1164e-21	yes	down		MSTRG.39740	PREDICTED: UDP-glycosyltransferase 91C1 [Fragaria vesca subsp. vesca]	2.33998	3.73873e-13	3.07396e-12	yes	up
maker-Fvb7-1-augustus-gene-286.65	PREDICTED: low-temperature-induced 65 kDa protein isoform X3 [Fragaria vesca subsp. vesca]	-4.98443	8.45e-200	1.70123e-197	yes	down		maker-Fvb2-1-snap-gene-87.55	disease resistance protein RPM1-like [Rosa chinensis]	1.35138	1.14106e-49	3.40667e-48	yes	up
maker-Fvb1-3-augustus-gene-56.38	PREDICTED: phosphoinositide phosphatase SAC6 [Fragaria vesca subsp. vesca]	-1.1149	3.13e-76	1.50348e-74	yes	down		MSTRG.65399	PREDICTED: linoleate 13S-lipoxygenase 2-1, chloroplastic-like [Fragaria vesca subsp. vesca]	1.00541	0.00187595	0.00547869	yes	up
maker-Fvb5-2-snap-gene-37.77	PREDICTED: high-affinity nitrate transporter 3.1-like [Fragaria vesca subsp. vesca]	-1.84244	9.91e-132	9.82763e-130	yes	down		augustus_masked-Fvb7-2-processed-gene-240.11	PREDICTED: nematode resistance protein-like HSPRO2 [Fragaria vesca subsp. vesca]	2.34197	2.46563e-08	1.38841e-07	yes	up
maker-Fvb7-2-snap-gene-316.71	PREDICTED: reticulon-like protein B2 [Fragaria vesca subsp. vesca]	-1.19417	0.00191281	0.00557712	yes	down		augustus_masked-Fvb6-3-processed-gene-173.2	PREDICTED: PLASMODESMATA CALLOSE-BINDING PROTEIN 5-like [Fragaria vesca subsp. vesca]	2.4633	4.40647e-06	1.9314e-05	yes	up
maker-Fvb3-1-snap-gene-295.33	PREDICTED: protein kinase PINOID [Fragaria vesca subsp. vesca]	-2.52138	3.16e-05	0.000123186	yes	down		maker-Fvb6-1-augustus-gene-344.37	PREDICTED: auxin-responsive protein IAA16 [Fragaria vesca subsp. vesca]	1.35252	1.21566e-161	1.65338e-159	yes	up
maker-Fvb7-2-snap-gene-96.34	PREDICTED: SPX domain-containing protein 3-like [Fragaria vesca subsp. vesca]	-1.92011	0.00175879	0.00516361	yes	down		snap_masked-Fvb7-4-processed-gene-145.19	PREDICTED: UPF0565 protein C2orf69 homolog [Fragaria vesca subsp. vesca]	1.21722	9.1597e-05	0.000334433	yes	up
augustus_masked-Fvb3-1-processed-gene-70.0	PREDICTED: calcium-transporting ATPase 4, endoplasmic reticulum-type-like [Fragaria vesca subsp. vesca]	-2.28506	2.06e-21	2.62387e-20	yes	down		augustus_masked-Fvb6-3-processed-gene-431.5	PREDICTED: wound-induced protein 1 [Fragaria vesca subsp. vesca]	2.28217	4.53362e-39	1.0519e-37	yes	up
maker-Fvb2-3-augustus-gene-72.18	PREDICTED: cysteine proteinase inhibitor A [Fragaria vesca subsp. vesca]	-1.28495	1.02e-10	7.05296e-10	yes	down		maker-Fvb2-4-augustus-gene-25.19	putative gibberellin regulated protein [Rosa chinensis]	3.47108	9.32412e-29	1.5772e-27	yes	up
MSTRG.63192	PREDICTED: low-temperature-induced 65 kDa protein isoform X7 [Fragaria vesca subsp. vesca]	-4.67235	0	0	yes	down		maker-Fvb6-1-snap-gene-24.69	putative quinone oxidoreductase, partial [Fragaria x ananassa]	1.30204	2.08657e-80	1.06481e-78	yes	up
maker-Fvb1-2-augustus-gene-191.23	PREDICTED: probable inactive leucine-rich repeat receptor-like protein kinase At1g66830 [Fragaria vesca subsp. vesca]	-3.2041	0.0208544	0.0477966	yes	down		maker-Fvb6-4-augustus-gene-212.52	PREDICTED: protein ASPARTIC PROTEASE IN GUARD CELL 2 [Fragaria vesca subsp. vesca]	1.41757	3.28719e-23	4.50737e-22	yes	up
maker-Fvb5-1-augustus-gene-99.58	PREDICTED: polynucleotide 5&apos;-hydroxyl-kinase NOL9 [Fragaria vesca subsp. vesca]	-1.25412	3.73e-05	0.000144041	yes	down		maker-Fvb1-4-snap-gene-3.74	PREDICTED: uncharacterized protein LOC105353455 [Fragaria vesca subsp. vesca]	2.78167	1.92195e-05	7.73433e-05	yes	up
MSTRG.24249	PREDICTED: putative lysine-specific demethylase JMJD5 [Fragaria vesca subsp. vesca]	-5.6745	0	0	yes	down		augustus_masked-Fvb7-1-processed-gene-246.6	PREDICTED: probable receptor-like protein kinase At2g39360 [Fragaria vesca subsp. vesca]	1.20379	0.000572983	0.00184204	yes	up
maker-Fvb3-1-augustus-gene-260.40	PREDICTED: primase homolog protein [Fragaria vesca subsp. vesca]	-1.00731	2.04e-31	3.74467e-30	yes	down		maker-Fvb2-4-augustus-gene-204.69	PREDICTED: probable LRR receptor-like serine/threonine-protein kinase At1g56140 [Fragaria vesca subsp. vesca]	1.15619	1.29324e-28	2.17779e-27	yes	up
MSTRG.2776	PREDICTED: uncharacterized protein LOC101298930 isoform X2 [Fragaria vesca subsp. vesca]	-3.20597	9.62e-41	2.32745e-39	yes	down		MSTRG.37811	PREDICTED: protein NRT1/ PTR FAMILY 6.3 isoform X2 [Fragaria vesca subsp. vesca]	2.18967	0.00927099	0.0232831	yes	up
MSTRG.35238	PREDICTED: ethylene-responsive transcription factor ERF061 [Fragaria vesca subsp. vesca]	-3.76078	1.19e-27	1.93372e-26	yes	down		augustus_masked-Fvb6-3-processed-gene-422.10	putative glycerophosphodiester phosphodiesterase, protein kinase RLK-Pelle-LRK10L-2 family [Rosa chinensis]	1.47206	5.7709e-05	0.000216632	yes	up
maker-Fvb7-2-snap-gene-317.65	PREDICTED: S-type anion channel SLAH2-like isoform X1 [Fragaria vesca subsp. vesca]	-1.56728	3.25e-44	8.57863e-43	yes	down		maker-Fvb3-1-snap-gene-220.26	PREDICTED: D-amino-acid transaminase, chloroplastic-like [Fragaria vesca subsp. vesca]	1.18511	3.12888e-06	1.39614e-05	yes	up
augustus_masked-Fvb1-3-processed-gene-211.7	PREDICTED: FK506-binding protein 3-like [Fragaria vesca subsp. vesca]	-2.45527	1.32e-07	6.89877e-07	yes	down		MSTRG.9764	PREDICTED: ethylene-responsive transcription factor RAP2-1-like [Fragaria vesca subsp. vesca]	1.0238	3.07852e-18	3.37067e-17	yes	up
MSTRG.7734	PREDICTED: uncharacterized protein LOC101296113 isoform X1 [Fragaria vesca subsp. vesca]	-1.06562	0.000813218	0.00254358	yes	down		MSTRG.3289	hypothetical protein PRUPE_7G228500 [Prunus persica]	1.42509	3.29997e-37	7.25168e-36	yes	up
maker-Fvb5-2-snap-gene-45.64	PREDICTED: probable inactive purple acid phosphatase 27 [Fragaria vesca subsp. vesca]	-1.30186	1.81e-16	1.80885e-15	yes	down		maker-Fvb2-4-augustus-gene-245.55	PREDICTED: suppressor protein SRP40-like [Fragaria vesca subsp. vesca]	2.24393	1.68642e-128	1.59788e-126	yes	up
augustus_masked-Fvb3-2-processed-gene-145.4	PREDICTED: mitogen-activated protein kinase kinase kinase ANP1-like [Fragaria vesca subsp. vesca]	-1.59268	0.0013592	0.00407703	yes	down		maker-Fvb7-4-augustus-gene-151.36	PREDICTED: probable mediator of RNA polymerase II transcription subunit 37c [Fragaria vesca subsp. vesca]	1.747	3.16872e-92	1.95521e-90	yes	up
maker-Fvb7-2-augustus-gene-233.61	PREDICTED: rop guanine nucleotide exchange factor 5 [Fragaria vesca subsp. vesca]	-1.066	0.00258126	0.00733323	yes	down		maker-Fvb2-1-augustus-gene-183.47	PREDICTED: endoglucanase 17 [Fragaria vesca subsp. vesca]	2.5593	5.52873e-12	4.18063e-11	yes	up
maker-Fvb2-4-augustus-gene-35.41	PREDICTED: bZIP transcription factor TRAB1 [Fragaria vesca subsp. vesca]	-1.08618	7.16e-40	1.70044e-38	yes	down		maker-Fvb6-2-snap-gene-331.45	PREDICTED: septum-promoting GTP-binding protein 1 [Fragaria vesca subsp. vesca]	1.69335	0.00095418	0.00294703	yes	up
MSTRG.20933	PREDICTED: uncharacterized protein LOC105349931 [Fragaria vesca subsp. vesca]	-4.57347	1.09e-299	4.32967e-297	yes	down		maker-Fvb4-1-augustus-gene-177.43	PREDICTED: uncharacterized protein LOC101315139 [Fragaria vesca subsp. vesca]	1.45587	2.07751e-47	5.92515e-46	yes	up
maker-Fvb7-4-snap-gene-21.81	PREDICTED: short-chain dehydrogenase TIC 32, chloroplastic-like isoform X2 [Fragaria vesca subsp. vesca]	-1.70322	1.41e-60	5.21558e-59	yes	down		maker-Fvb7-3-augustus-gene-184.40	PREDICTED: probable receptor-like protein kinase At1g67000 [Fragaria vesca subsp. vesca]	2.92876	1.26123e-09	7.99356e-09	yes	up
snap_masked-Fvb1-3-processed-gene-75.25	PREDICTED: uncharacterized protein At4g02000-like [Fragaria vesca subsp. vesca]	-1.51728	4.13e-218	9.44256e-216	yes	down		maker-Fvb6-2-snap-gene-345.66	PREDICTED: cyclic nucleotide-gated ion channel 1-like [Fragaria vesca subsp. vesca]	1.15858	2.35886e-118	2.01574e-116	yes	up
maker-Fvb2-4-augustus-gene-164.36	PREDICTED: uncharacterized protein LOC101306096 [Fragaria vesca subsp. vesca]	-1.35237	1.59e-06	7.34347e-06	yes	down		augustus_masked-Fvb5-4-processed-gene-47.3	PREDICTED: magnesium protoporphyrin IX methyltransferase, chloroplastic [Fragaria vesca subsp. vesca]	1.49511	8.86083e-11	6.13251e-10	yes	up
MSTRG.17649	PREDICTED: ankyrin repeat-containing protein At5g02620-like [Fragaria vesca subsp. vesca]	-1.46961	3.54e-21	4.46028e-20	yes	down		maker-Fvb1-4-augustus-gene-14.56	PREDICTED: phospholipase D alpha 1-like [Fragaria vesca subsp. vesca]	1.83974	0.0182109	0.0424084	yes	up
augustus_masked-Fvb7-4-processed-gene-110.6	PREDICTED: G-type lectin S-receptor-like serine/threonine-protein kinase SD2-2 [Fragaria vesca subsp. vesca]	-2.16072	2.07e-30	3.6942e-29	yes	down		maker-Fvb4-4-augustus-gene-23.44	PREDICTED: probable xyloglucan endotransglucosylase/hydrolase protein 28 [Fragaria vesca subsp. vesca]	1.26409	1.96244e-47	5.59873e-46	yes	up
MSTRG.26475	TMV resistance protein N-like isoform X1 [Rosa chinensis]	-1.07595	6.78e-56	2.29997e-54	yes	down		maker-Fvb2-1-augustus-gene-89.26	PREDICTED: putative UDP-glucuronate:xylan alpha-glucuronosyltransferase 3 [Fragaria vesca subsp. vesca]	1.10553	2.11834e-07	1.08023e-06	yes	up
maker-Fvb5-3-augustus-gene-185.44	PREDICTED: ATP-dependent RNA helicase DHX36 [Fragaria vesca subsp. vesca]	-1.08184	2.42e-39	5.66226e-38	yes	down		maker-Fvb6-4-augustus-gene-275.36	PREDICTED: pyrophosphate-energized membrane proton pump 2 [Fragaria vesca subsp. vesca]	1.03584	6.16084e-26	9.39802e-25	yes	up
snap_masked-Fvb7-3-processed-gene-10.42	PREDICTED: peptidyl-prolyl cis-trans isomerase FKBP53 [Fragaria vesca subsp. vesca]	-1.25782	6e-08	3.23782e-07	yes	down		MSTRG.51042	PREDICTED: uncharacterized protein LOC105352404 [Fragaria vesca subsp. vesca]	1.34297	0.00322064	0.00897075	yes	up
snap_masked-Fvb3-3-processed-gene-205.11	PREDICTED: probable leucine-rich repeat receptor-like protein kinase At5g49770 isoform X3 [Fragaria vesca subsp. vesca]	-1.97486	0.000184664	0.000643721	yes	down		maker-Fvb6-2-augustus-gene-305.59	hypothetical protein RchiOBHm_Chr2g0167761 [Rosa chinensis]	1.86399	1.69083e-25	2.53571e-24	yes	up
augustus_masked-Fvb3-4-processed-gene-252.13	PREDICTED: dof zinc finger protein DOF1.5 [Fragaria vesca subsp. vesca]	-2.1873	0.0131698	0.0317912	yes	down		augustus_masked-Fvb1-3-processed-gene-5.16	PREDICTED: heat shock 70 kDa protein [Fragaria vesca subsp. vesca]	4.3894	4.00784e-43	1.0337e-41	yes	up
augustus_masked-Fvb2-4-processed-gene-74.5	PREDICTED: cysteine-rich repeat secretory protein 38-like [Fragaria vesca subsp. vesca]	-1.62451	4.09e-08	2.24745e-07	yes	down		augustus_masked-Fvb2-3-processed-gene-15.0	PREDICTED: titin isoform X1 [Fragaria vesca subsp. vesca]	3.29558	2.20184e-07	1.1201e-06	yes	up
maker-Fvb7-1-augustus-gene-42.21	probable pectinesterase/pectinesterase inhibitor 25 [Rosa chinensis]	-2.04783	0.000173955	0.000608473	yes	down		maker-Fvb6-1-augustus-gene-117.45	PREDICTED: linoleate 13S-lipoxygenase 3-1, chloroplastic-like [Fragaria vesca subsp. vesca]	1.34298	1.9527e-28	3.26282e-27	yes	up
maker-Fvb1-4-augustus-gene-26.49	PREDICTED: probable pectinesterase 53 [Fragaria vesca subsp. vesca]	-2.72897	3.41e-05	0.000132545	yes	down		MSTRG.18939	PREDICTED: protein SMG7L [Fragaria vesca subsp. vesca]	1.10996	2.39042e-09	1.4789e-08	yes	up
MSTRG.26371	dihydroceramide fatty acyl 2-hydroxylase FAH2-like [Rosa chinensis]	-1.60285	1.22e-18	1.36704e-17	yes	down		maker-Fvb1-3-snap-gene-92.23	PREDICTED: uncharacterized acetyltransferase At3g50280-like [Fragaria vesca subsp. vesca]	1.30483	7.21957e-37	1.57352e-35	yes	up
maker-Fvb7-3-augustus-gene-68.61	PREDICTED: folylpolyglutamate synthase [Fragaria vesca subsp. vesca]	-1.00695	2.49e-12	1.92934e-11	yes	down		maker-Fvb4-3-augustus-gene-199.55	PREDICTED: major allergen Pru ar 1-like [Fragaria vesca subsp. vesca]	1.90761	2.51333e-182	4.3036e-180	yes	up
maker-Fvb1-3-augustus-gene-84.53	PREDICTED: protein root UVB sensitive 4 [Fragaria vesca subsp. vesca]	-1.25028	1.6e-19	1.8599e-18	yes	down		MSTRG.14004	PREDICTED: UPF0496 protein 4 [Fragaria vesca subsp. vesca]	1.01474	3.19568e-24	4.56718e-23	yes	up
snap_masked-Fvb7-2-processed-gene-288.52	PREDICTED: zingipain-2-like [Fragaria vesca subsp. vesca]	-2.90869	0.018451	0.0428854	yes	down		maker-Fvb1-3-augustus-gene-30.62	PREDICTED: inositol oxygenase 4 [Fragaria vesca subsp. vesca]	4.70355	2.51267e-15	2.36492e-14	yes	up
maker-Fvb7-1-augustus-gene-276.46	PREDICTED: trehalose-phosphate phosphatase A [Fragaria vesca subsp. vesca]	-1.12492	7.17e-32	1.33666e-30	yes	down		MSTRG.55493	PREDICTED: zinc finger protein CONSTANS-LIKE 14-like [Fragaria vesca subsp. vesca]	1.09602	2.14597e-05	8.5817e-05	yes	up
maker-Fvb2-1-augustus-gene-194.38	PREDICTED: lactation elevated protein 1 [Fragaria vesca subsp. vesca]	-2.68534	5.8e-53	1.84636e-51	yes	down		augustus_masked-Fvb7-1-processed-gene-286.2	PREDICTED: sorbitol dehydrogenase [Fragaria vesca subsp. vesca]	1.15322	9.46112e-34	1.87254e-32	yes	up
maker-Fvb7-3-snap-gene-54.64	PREDICTED: potassium transporter 2 [Fragaria vesca subsp. vesca]	-1.24631	1.16e-122	1.03425e-120	yes	down		augustus_masked-Fvb6-2-processed-gene-298.13	PREDICTED: protein CREG1 [Fragaria vesca subsp. vesca]	2.0263	4.58453e-38	1.03533e-36	yes	up
maker-Fvb6-4-augustus-gene-233.28	hypothetical protein RchiOBHm_Chr2g0137291 [Rosa chinensis]	-3.35422	4.06e-11	2.88048e-10	yes	down		maker-Fvb1-1-augustus-gene-273.44	PREDICTED: UDP-glycosyltransferase 74E1-like [Fragaria vesca subsp. vesca]	1.50523	2.91177e-38	6.60864e-37	yes	up
maker-Fvb5-1-augustus-gene-97.45	PREDICTED: protein NUCLEAR FUSION DEFECTIVE 4-like [Fragaria vesca subsp. vesca]	-1.10591	2.2e-42	5.58078e-41	yes	down		maker-Fvb4-3-snap-gene-72.55	PREDICTED: UDP-glycosyltransferase 74E1-like [Fragaria vesca subsp. vesca]	1.16125	5.69428e-47	1.60884e-45	yes	up
maker-Fvb7-3-augustus-gene-36.48	PREDICTED: MADS-box protein SOC1-like isoform X2 [Fragaria vesca subsp. vesca]	-1.90887	9.56e-16	9.19569e-15	yes	down		snap_masked-Fvb6-1-processed-gene-298.34	tryptophan synthase alpha chain-like [Rosa chinensis]	2.49648	0.00234762	0.00672901	yes	up
maker-Fvb7-1-snap-gene-308.79	PREDICTED: ABC transporter C family member 10-like [Fragaria vesca subsp. vesca]	-1.65268	2e-122	1.78062e-120	yes	down		maker-Fvb3-4-augustus-gene-8.46	PREDICTED: feruloyl CoA ortho-hydroxylase 1 [Fragaria vesca subsp. vesca]	1.54596	1.9308e-08	1.09899e-07	yes	up
maker-Fvb3-2-snap-gene-156.35	PREDICTED: GDSL esterase/lipase At1g28580-like [Fragaria vesca subsp. vesca]	-1.4521	8.32e-14	7.15127e-13	yes	down		maker-Fvb2-3-augustus-gene-136.38	PREDICTED: G-box-binding factor 4-like [Fragaria vesca subsp. vesca]	1.83402	4.64961e-06	2.03177e-05	yes	up
snap_masked-Fvb7-1-processed-gene-198.21	PREDICTED: hydroquinone glucosyltransferase-like [Fragaria vesca subsp. vesca]	-1.21533	3.04e-11	2.17775e-10	yes	down		snap_masked-Fvb2-4-processed-gene-237.19	PREDICTED: uncharacterized protein LOC101296545 [Fragaria vesca subsp. vesca]	1.65637	9.77339e-79	4.83497e-77	yes	up
snap_masked-Fvb4-4-processed-gene-137.15	uncharacterized protein LOC112196494 [Rosa chinensis]	-1.56501	5.96e-57	2.06438e-55	yes	down		MSTRG.66160	PREDICTED: ribulose bisphosphate carboxylase/oxygenase activase, chloroplastic isoform X1 [Fragaria vesca subsp. vesca]	1.64515	3.96686e-291	1.46662e-288	yes	up
maker-Fvb3-2-augustus-gene-41.60	PREDICTED: probable LRR receptor-like serine/threonine-protein kinase At2g24230 [Fragaria vesca subsp. vesca]	-1.21652	2.92e-07	1.46435e-06	yes	down		augustus_masked-Fvb3-4-processed-gene-211.5	disease resistance protein RPM1-like [Rosa chinensis]	1.9155	3.33439e-16	3.28976e-15	yes	up
maker-Fvb3-4-augustus-gene-210.31	PREDICTED: ubiquitin carboxyl-terminal hydrolase 15 isoform X2 [Fragaria vesca subsp. vesca]	-1.2603	9.67e-75	4.51669e-73	yes	down		augustus_masked-Fvb4-4-processed-gene-14.6	transcription factor bHLH150 [Rosa chinensis]	1.97999	3.81938e-13	3.13799e-12	yes	up
MSTRG.59938	PREDICTED: probable protein phosphatase 2C 51 [Fragaria vesca subsp. vesca]	-2.15679	3.29e-40	7.89104e-39	yes	down		augustus_masked-Fvb3-2-processed-gene-242.7	PREDICTED: 3-ketoacyl-CoA synthase 12 [Fragaria vesca subsp. vesca]	1.35145	1.22839e-28	2.06973e-27	yes	up
MSTRG.46310	pollen-specific leucine-rich repeat extensin-like protein 3 [Rosa chinensis]	-1.09148	1.72e-08	9.81778e-08	yes	down		maker-Fvb3-4-snap-gene-74.40	PREDICTED: 18.1 kDa class I heat shock protein-like [Fragaria vesca subsp. vesca]	4.10681	5.79024e-09	3.46538e-08	yes	up
maker-Fvb7-1-augustus-gene-200.53	PREDICTED: DEAD-box ATP-dependent RNA helicase 31-like [Fragaria vesca subsp. vesca]	-1.47246	7.45e-75	3.48882e-73	yes	down		augustus_masked-Fvb6-1-processed-gene-73.12	PREDICTED: receptor-like protein 12 [Fragaria vesca subsp. vesca]	1.48025	0.0124927	0.0303493	yes	up
maker-Fvb1-4-augustus-gene-29.51	PREDICTED: phytochrome E-like isoform X1 [Fragaria vesca subsp. vesca]	-1.82252	6.91e-100	4.7226e-98	yes	down		maker-Fvb1-3-augustus-gene-24.33	PREDICTED: aldehyde dehydrogenase family 2 member C4-like [Fragaria vesca subsp. vesca]	2.05632	3.87413e-33	7.49994e-32	yes	up
augustus_masked-Fvb2-4-processed-gene-235.0	PREDICTED: SCP2 sterol-binding domain-containing protein 1-like [Fragaria vesca subsp. vesca]	-1.03147	0.00158014	0.00468027	yes	down		snap_masked-Fvb6-1-processed-gene-356.32	PREDICTED: isopentenyl-diphosphate Delta-isomerase I [Fragaria vesca subsp. vesca]	4.95873	3.28314e-158	4.33513e-156	yes	up
MSTRG.5031	PREDICTED: 2-Cys peroxiredoxin BAS1, chloroplastic [Fragaria vesca subsp. vesca]	-1.41971	0.00174184	0.00511865	yes	down		maker-Fvb1-3-augustus-gene-67.43	PREDICTED: floral homeotic protein DEFICIENS-like [Fragaria vesca subsp. vesca]	2.24059	3.23997e-06	1.44301e-05	yes	up
augustus_masked-Fvb2-3-processed-gene-110.5	PREDICTED: serine/threonine-protein kinase 38-like [Fragaria vesca subsp. vesca]	-1.54034	1.23e-07	6.45542e-07	yes	down		maker-Fvb7-2-augustus-gene-307.47	PREDICTED: gibberellin 20 oxidase 1 [Fragaria vesca subsp. vesca]	3.01584	2.99388e-28	4.97228e-27	yes	up
maker-Fvb2-3-augustus-gene-208.30	PREDICTED: transcription factor bHLH54 [Fragaria vesca subsp. vesca]	-4.87574	0.0213456	0.0487532	yes	down		maker-Fvb6-3-snap-gene-414.65	PREDICTED: sugar transporter ERD6-like 5 [Fragaria vesca subsp. vesca]	1.24117	2.22595e-58	7.94126e-57	yes	up
maker-Fvb5-2-augustus-gene-219.29	PREDICTED: protein tumorous imaginal discs, mitochondrial [Fragaria vesca subsp. vesca]	-1.54047	3.97e-65	1.59311e-63	yes	down		maker-Fvb1-1-snap-gene-186.64	PREDICTED: protein RADIALIS-like 4 [Fragaria vesca subsp. vesca]	1.02375	2.61539e-29	4.50646e-28	yes	up
maker-Fvb2-2-augustus-gene-151.44	glutamate receptor 2.7-like isoform X1 [Rosa chinensis]	-2.5883	0.00339394	0.00940918	yes	down		snap_masked-Fvb7-2-processed-gene-111.25	PREDICTED: BON1-associated protein 1 [Fragaria vesca subsp. vesca]	2.01254	0.00896852	0.0226075	yes	up
maker-Fvb1-4-snap-gene-110.17	PREDICTED: protein TRANSPARENT TESTA 12-like [Fragaria vesca subsp. vesca]	-1.55514	2.31e-19	2.66699e-18	yes	down		maker-Fvb2-4-augustus-gene-83.28	PREDICTED: putative glutamine amidotransferase YLR126C [Fragaria vesca subsp. vesca]	2.69417	2.46687e-17	2.58625e-16	yes	up
maker-Fvb4-3-snap-gene-115.54	ABC transporter B family member 11-like isoform X3 [Rosa chinensis]	-1.77585	3.32e-06	1.47799e-05	yes	down		snap_masked-Fvb6-4-processed-gene-168.14	PREDICTED: cleavage stimulating factor 64-like [Fragaria vesca subsp. vesca]	2.33662	5.0635e-32	9.50191e-31	yes	up
maker-Fvb2-2-augustus-gene-86.53	PREDICTED: purple acid phosphatase 15 [Fragaria vesca subsp. vesca]	-2.12508	2.41e-142	2.70031e-140	yes	down		maker-Fvb6-4-snap-gene-0.63	PREDICTED: TMV resistance protein N-like [Fragaria vesca subsp. vesca]	1.21044	0.0201277	0.0463207	yes	up
MSTRG.41521	PREDICTED: protein FAR1-RELATED SEQUENCE 5-like [Fragaria vesca subsp. vesca]	-3.0064	0	0	yes	down		maker-Fvb5-1-snap-gene-118.44	PREDICTED: DNA mismatch repair protein MSH4 [Fragaria vesca subsp. vesca]	4.14741	6.00227e-40	1.42776e-38	yes	up
maker-Fvb6-2-snap-gene-278.50	putative transcription factor MADS-type1 family [Rosa chinensis]	-2.88841	7.58e-05	0.00028008	yes	down		augustus_masked-Fvb3-2-processed-gene-138.0	PREDICTED: uncharacterized protein LOC101303307 [Fragaria vesca subsp. vesca]	1.08762	4.25658e-05	0.00016323	yes	up
maker-Fvb1-4-snap-gene-196.35	LOW QUALITY PROTEIN: uncharacterized protein LOC112176717 [Rosa chinensis]	-1.47674	5.4e-78	2.65022e-76	yes	down		maker-Fvb4-3-augustus-gene-23.41	PREDICTED: probable xyloglucan endotransglucosylase/hydrolase protein 28 [Fragaria vesca subsp. vesca]	1.48919	3.02245e-165	4.31145e-163	yes	up
maker-Fvb4-3-snap-gene-274.63	PREDICTED: isoamylase 1, chloroplastic [Fragaria vesca subsp. vesca]	-1.56186	1.6e-60	5.9006e-59	yes	down		augustus_masked-Fvb6-3-processed-gene-9.5	PREDICTED: uncharacterized protein LOC105352535 [Fragaria vesca subsp. vesca]	2.05299	8.77506e-05	0.000321231	yes	up
augustus_masked-Fvb3-1-processed-gene-60.3	PREDICTED: factor of DNA methylation 4 isoform X3 [Fragaria vesca subsp. vesca]	-1.04162	2.76e-12	2.13744e-11	yes	down		maker-Fvb1-4-augustus-gene-70.33	PREDICTED: BTB/POZ domain-containing protein At3g50780 [Fragaria vesca subsp. vesca]	1.1811	4.09542e-20	4.91152e-19	yes	up
maker-Fvb5-2-augustus-gene-189.22	PREDICTED: chloroplastic group IIB intron splicing facilitator CRS2-B, chloroplastic-like [Fragaria vesca subsp. vesca]	-1.12094	9.74e-46	2.66677e-44	yes	down		maker-Fvb6-3-augustus-gene-423.37	PREDICTED: U-box domain-containing protein 9-like [Fragaria vesca subsp. vesca]	1.86941	4.61094e-05	0.000175984	yes	up
snap_masked-Fvb4-4-processed-gene-64.12	PREDICTED: uncharacterized protein LOC101315017 [Fragaria vesca subsp. vesca]	-1.02882	4.62e-05	0.000176343	yes	down		MSTRG.688	PREDICTED: FACT complex subunit SPT16-like [Fragaria vesca subsp. vesca]	1.09902	1.3023e-50	3.95454e-49	yes	up
maker-Fvb7-4-augustus-gene-24.63	PREDICTED: uncharacterized protein LOC101298945 [Fragaria vesca subsp. vesca]	-5.27077	3.48e-70	1.51409e-68	yes	down		snap_masked-Fvb4-3-processed-gene-44.36	PREDICTED: protein STRICTOSIDINE SYNTHASE-LIKE 10-like [Fragaria vesca subsp. vesca]	4.80151	7.65068e-90	4.57732e-88	yes	up
snap_masked-Fvb5-1-processed-gene-252.16	60S ribosomal protein L11-like isoform X1 [Rosa chinensis]	-1.23178	1.01e-28	1.71364e-27	yes	down		maker-Fvb1-1-augustus-gene-221.60	PREDICTED: GDSL esterase/lipase EXL3-like [Fragaria vesca subsp. vesca]	1.17641	4.79435e-11	3.38275e-10	yes	up
snap_masked-Fvb5-2-processed-gene-232.16	PREDICTED: uncharacterized protein LOC105351936 [Fragaria vesca subsp. vesca]	-1.77273	0.00298771	0.00838618	yes	down		maker-Fvb5-3-augustus-gene-258.33	PREDICTED: uncharacterized protein LOC101313411 [Fragaria vesca subsp. vesca]	3.21865	2.74545e-18	3.01474e-17	yes	up
maker-Fvb3-3-snap-gene-167.36	PREDICTED: uncharacterized protein LOC101315024 isoform X1 [Fragaria vesca subsp. vesca]	-1.21276	5.12e-75	2.40797e-73	yes	down		MSTRG.57404	proline-rich receptor-like protein kinase PERK8 [Rosa chinensis]	4.42846	1.83535e-14	1.63341e-13	yes	up
MSTRG.53223	PREDICTED: ABC transporter G family member 22 isoform X1 [Fragaria vesca subsp. vesca]	-1.57268	1.58e-191	2.94753e-189	yes	down		maker-Fvb3-1-augustus-gene-207.28	PREDICTED: D-amino-acid transaminase, chloroplastic-like [Fragaria vesca subsp. vesca]	1.09605	6.24702e-09	3.72645e-08	yes	up
augustus_masked-Fvb1-1-processed-gene-97.14	PREDICTED: ankyrin repeat-containing protein P16F5.05c [Fragaria vesca subsp. vesca]	-1.19314	0.000294309	0.000991293	yes	down		maker-Fvb7-4-augustus-gene-151.41	PREDICTED: probable receptor-like protein kinase At5g47070 [Fragaria vesca subsp. vesca]	1.02625	0.000219802	0.000756598	yes	up
augustus_masked-Fvb3-2-processed-gene-197.0	PREDICTED: protein TIC 20-v, chloroplastic [Fragaria vesca subsp. vesca]	-1.2882	1.91e-19	2.21498e-18	yes	down		maker-Fvb6-3-augustus-gene-349.36	PREDICTED: uncharacterized protein LOC101309648 [Fragaria vesca subsp. vesca]	1.01151	9.6036e-16	9.23367e-15	yes	up
maker-Fvb6-2-augustus-gene-159.24	PREDICTED: protein ROS1 [Fragaria vesca subsp. vesca]	-1.09137	1.2e-98	8.09758e-97	yes	down		maker-Fvb1-4-augustus-gene-82.32	PREDICTED: transcription factor SPATULA [Fragaria vesca subsp. vesca]	1.8369	0.00521478	0.0138681	yes	up
MSTRG.55368	PREDICTED: transcription factor bHLH147-like [Fragaria vesca subsp. vesca]	-2.15076	1.26e-183	2.18086e-181	yes	down		augustus_masked-Fvb2-1-processed-gene-151.17	PREDICTED: uncharacterized protein LOC101305340 isoform X1 [Fragaria vesca subsp. vesca]	1.09521	4.65426e-29	7.93949e-28	yes	up
maker-Fvb6-2-augustus-gene-182.35	PREDICTED: L-ascorbate peroxidase 2, cytosolic-like [Fragaria vesca subsp. vesca]	-1.36507	1.38e-34	2.81153e-33	yes	down		augustus_masked-Fvb1-1-processed-gene-159.5	PREDICTED: FACT complex subunit SPT16-like [Fragaria vesca subsp. vesca]	1.09902	1.3023e-50	3.95454e-49	yes	up
snap_masked-Fvb4-3-processed-gene-51.24	PREDICTED: homologous-pairing protein 2 homolog [Fragaria vesca subsp. vesca]	-1.59151	2.49e-36	5.32228e-35	yes	down		maker-Fvb3-4-snap-gene-64.66	metallothionein-like protein 1B [Rosa chinensis]	2.47623	2.04552e-253	6.19682e-251	yes	up
maker-Fvb7-4-augustus-gene-2.79	PREDICTED: transducin beta-like protein 3 [Fragaria vesca subsp. vesca]	-1.07617	4.06e-14	3.54966e-13	yes	down		maker-Fvb3-3-snap-gene-52.32	PREDICTED: NAC domain-containing protein 21/22-like isoform X1 [Fragaria vesca subsp. vesca]	2.62779	1.16984e-16	1.18551e-15	yes	up
MSTRG.13405	PREDICTED: putative sodium-coupled neutral amino acid transporter 11 [Fragaria vesca subsp. vesca]	-1.41637	0.00528099	0.0140256	yes	down		maker-Fvb1-1-augustus-gene-114.17	PREDICTED: chromatin assembly factor 1 subunit FAS2 isoform X1 [Fragaria vesca subsp. vesca]	1.15098	2.3803e-06	1.07676e-05	yes	up
maker-Fvb3-4-augustus-gene-40.49	PREDICTED: protein NUCLEAR FUSION DEFECTIVE 4 [Fragaria vesca subsp. vesca]	-3.74518	1.1e-26	1.7241e-25	yes	down		maker-Fvb3-3-augustus-gene-52.28	PREDICTED: NAC domain-containing protein 21/22-like isoform X1 [Fragaria vesca subsp. vesca]	2.27649	2.28832e-11	1.65717e-10	yes	up
MSTRG.55304	PREDICTED: psbP domain-containing protein 7, chloroplastic [Fragaria vesca subsp. vesca]	-1.07121	1.58e-05	6.40842e-05	yes	down		maker-Fvb2-1-augustus-gene-112.35	PREDICTED: F-box/LRR-repeat protein 12 [Fragaria vesca subsp. vesca]	1.20175	0.000156839	0.000552094	yes	up
maker-Fvb2-3-augustus-gene-163.22	PREDICTED: WD repeat-containing protein 13 [Fragaria vesca subsp. vesca]	-1.35748	2.63e-62	1.00613e-60	yes	down		augustus_masked-Fvb5-2-processed-gene-14.8	PREDICTED: BTB/POZ domain-containing protein At5g41330 [Fragaria vesca subsp. vesca]	2.17495	4.13881e-16	4.05382e-15	yes	up
maker-Fvb5-4-snap-gene-84.53	PREDICTED: beta-amyrin 28-oxidase-like [Fragaria vesca subsp. vesca]	-1.39937	1.7e-07	8.75802e-07	yes	down		maker-Fvb6-2-snap-gene-326.62	PREDICTED: myb-related protein Myb4-like [Fragaria vesca subsp. vesca]	1.63286	0.0161279	0.0380774	yes	up
maker-Fvb4-1-augustus-gene-154.36	PREDICTED: probable transcription factor GLK2 [Fragaria vesca subsp. vesca]	-1.45572	5.34e-20	6.36128e-19	yes	down		snap_masked-Fvb3-1-processed-gene-146.13	PREDICTED: uncharacterized protein LOC101306022 [Fragaria vesca subsp. vesca]	1.32113	1.77073e-13	1.48982e-12	yes	up
maker-Fvb3-3-augustus-gene-130.34	PREDICTED: pirin-like protein [Fragaria vesca subsp. vesca]	-2.83744	9.68e-16	9.29913e-15	yes	down		MSTRG.29573	PREDICTED: uncharacterized protein LOC101291512 [Fragaria vesca subsp. vesca]	1.05835	6.32914e-10	4.10295e-09	yes	up
maker-Fvb4-2-snap-gene-61.57	PREDICTED: ABC transporter B family member 26, chloroplastic [Fragaria vesca subsp. vesca]	-1.57205	3.1e-139	3.37593e-137	yes	down		MSTRG.14803	PREDICTED: squalene monooxygenase-like [Fragaria vesca subsp. vesca]	2.32509	5.92006e-42	1.4797e-40	yes	up
maker-Fvb2-3-snap-gene-130.26	PREDICTED: protein WHI3 [Fragaria vesca subsp. vesca]	-1.00768	0.00734123	0.0188758	yes	down		maker-Fvb4-2-augustus-gene-81.44	xyloglucan endotransglucosylase/hydrolase 1 [Fragaria x ananassa]	3.23847	1.05133e-54	3.47939e-53	yes	up
maker-Fvb5-2-snap-gene-28.37	endo-beta-1,4-glucanase [Fragaria x ananassa]	-1.14768	3.07e-17	3.20163e-16	yes	down		maker-Fvb6-3-snap-gene-182.39	PREDICTED: E3 ubiquitin-protein ligase RMA1H1-like [Fragaria vesca subsp. vesca]	1.06238	5.30259e-26	8.12017e-25	yes	up
maker-Fvb3-4-augustus-gene-121.21	PREDICTED: uncharacterized protein LOC101292284 isoform X1 [Fragaria vesca subsp. vesca]	-1.07177	1.12e-43	2.91473e-42	yes	down		maker-Fvb3-1-augustus-gene-56.16	PREDICTED: zinc transporter 2 [Fragaria vesca subsp. vesca]	2.52531	1.51953e-05	6.18608e-05	yes	up
maker-Fvb7-1-augustus-gene-296.38	PREDICTED: probable protein phosphatase 2C 51 [Fragaria vesca subsp. vesca]	-2.15679	3.29e-40	7.89104e-39	yes	down		maker-Fvb3-4-augustus-gene-274.35	PREDICTED: sugar carrier protein C [Fragaria vesca subsp. vesca]	1.4937	6.21909e-141	6.85318e-139	yes	up
maker-Fvb6-3-augustus-gene-353.35	PREDICTED: ferritin-3, chloroplastic [Fragaria vesca subsp. vesca]	-2.29074	9.97e-183	1.71362e-180	yes	down		augustus_masked-Fvb6-4-processed-gene-334.5	PREDICTED: uncharacterized protein LOC105352497 [Fragaria vesca subsp. vesca]	2.27059	0.00674339	0.0174816	yes	up
maker-Fvb6-1-augustus-gene-255.38	PREDICTED: phenylalanine ammonia-lyase 1 [Fragaria vesca subsp. vesca]	-2.85123	0	0	yes	down		augustus_masked-Fvb2-2-processed-gene-172.6	PREDICTED: UPF0496 protein At4g34320-like [Fragaria vesca subsp. vesca]	2.52132	2.54884e-61	9.56012e-60	yes	up
maker-Fvb6-2-augustus-gene-200.47	PREDICTED: probable peroxygenase 4 [Fragaria vesca subsp. vesca]	-1.33143	0.0135494	0.0326146	yes	down		augustus_masked-Fvb5-1-processed-gene-19.16	PREDICTED: uncharacterized protein LOC101296490 [Fragaria vesca subsp. vesca]	2.52823	0.0180443	0.0420734	yes	up
maker-Fvb3-3-augustus-gene-30.64	PREDICTED: squamosa promoter-binding-like protein 3 [Fragaria vesca subsp. vesca]	-2.64924	2.01e-44	5.32585e-43	yes	down		MSTRG.51797	PREDICTED: uncharacterized protein LOC101293803 [Fragaria vesca subsp. vesca]	1.76264	6.68762e-55	2.22057e-53	yes	up
MSTRG.40686	PREDICTED: floral homeotic protein APETALA 2-like isoform X3 [Fragaria vesca subsp. vesca]	-1.05097	5.09e-15	4.69875e-14	yes	down		maker-Fvb6-3-augustus-gene-171.20	PREDICTED: protein trichome birefringence-like 39 [Fragaria vesca subsp. vesca]	1.92491	6.07537e-05	0.000227459	yes	up
maker-Fvb1-2-snap-gene-43.97	PREDICTED: protein SRG1-like [Fragaria vesca subsp. vesca]	-1.56106	1.86e-21	2.37182e-20	yes	down		maker-Fvb5-2-augustus-gene-16.39	PREDICTED: 1-aminocyclopropane-1-carboxylate synthase [Fragaria vesca subsp. vesca]	2.01297	2.73562e-32	5.16348e-31	yes	up
MSTRG.36509	PREDICTED: protein ATAF2-like [Fragaria vesca subsp. vesca]	-1.54844	8.59e-20	1.01035e-18	yes	down		MSTRG.40654	PREDICTED: cx9C motif-containing protein 4, mitochondrial [Fragaria vesca subsp. vesca]	1.7479	0.00187283	0.00547056	yes	up
maker-Fvb7-1-augustus-gene-183.52	PREDICTED: GDSL esterase/lipase At4g01130 isoform X2 [Fragaria vesca subsp. vesca]	-2.69942	0.000244194	0.000833684	yes	down		maker-Fvb7-2-augustus-gene-247.57	PREDICTED: protein NRT1/ PTR FAMILY 5.1 [Fragaria vesca subsp. vesca]	1.0517	1.91123e-09	1.19246e-08	yes	up
MSTRG.2477	PREDICTED: putative protein TPRXL isoform X1 [Prunus mume]	-1.8717	2.75e-40	6.60344e-39	yes	down		maker-Fvb7-4-augustus-gene-47.59	PREDICTED: cytochrome P450 90A1 [Fragaria vesca subsp. vesca]	1.86627	2.8615e-81	1.48793e-79	yes	up
maker-Fvb4-1-augustus-gene-148.42	uncharacterized protein LOC112198129 [Rosa chinensis]	-1.00147	5.43e-08	2.94484e-07	yes	down		maker-Fvb1-4-augustus-gene-135.28	hypothetical protein RchiOBHm_Chr2g0118101 [Rosa chinensis]	1.71876	2.3549e-25	3.51763e-24	yes	up
maker-Fvb6-1-augustus-gene-317.51	PREDICTED: solute carrier family 40 member 3, chloroplastic [Fragaria vesca subsp. vesca]	-1.1817	7.4e-61	2.75215e-59	yes	down		augustus_masked-Fvb5-4-processed-gene-55.1	PREDICTED: cytochrome P450 78A9-like [Fragaria vesca subsp. vesca]	1.82689	4.84193e-91	2.93762e-89	yes	up
maker-Fvb3-3-augustus-gene-54.26	PREDICTED: chaperonin 60 subunit alpha 2, chloroplastic isoform X3 [Fragaria vesca subsp. vesca]	-1.03836	4.67e-05	0.000177957	yes	down		augustus_masked-Fvb2-4-processed-gene-245.3	PREDICTED: F-box protein AFR [Fragaria vesca subsp. vesca]	2.26753	2.20758e-131	2.16646e-129	yes	up
maker-Fvb5-2-snap-gene-67.59	PREDICTED: probable serine/threonine-protein kinase At1g18390 isoform X2 [Fragaria vesca subsp. vesca]	-1.41539	2.94e-07	1.47358e-06	yes	down		maker-Fvb1-3-augustus-gene-7.52	PREDICTED: uncharacterized protein LOC101306949 [Fragaria vesca subsp. vesca]	1.2834	1.18136e-15	1.13069e-14	yes	up
maker-Fvb7-1-snap-gene-74.32	PREDICTED: ent-kaurenoic acid oxidase 1-like [Fragaria vesca subsp. vesca]	-1.26705	0.000181311	0.000632565	yes	down		snap_masked-Fvb7-3-processed-gene-60.36	hypothetical protein PRUPE_6G200800 [Prunus persica]	2.22235	1.13791e-163	1.59064e-161	yes	up
augustus_masked-Fvb6-2-processed-gene-65.4	PREDICTED: uncharacterized protein LOC101308691 [Fragaria vesca subsp. vesca]	-1.29976	1.28e-08	7.41032e-08	yes	down		augustus_masked-Fvb1-4-processed-gene-147.2	PREDICTED: ABC transporter G family member 5 [Fragaria vesca subsp. vesca]	1.63225	1.11105e-13	9.46752e-13	yes	up
maker-Fvb3-4-augustus-gene-222.43	PREDICTED: G-type lectin S-receptor-like serine/threonine-protein kinase B120 isoform X1 [Fragaria vesca subsp. vesca]	-2.33985	1.98e-121	1.74733e-119	yes	down		maker-Fvb6-2-augustus-gene-327.64	xyloglucan endotransglucosylase/hydrolase [Rosa hybrid cultivar]	3.1227	5.43992e-49	1.59725e-47	yes	up
maker-Fvb1-1-snap-gene-266.64	PREDICTED: uncharacterized protein LOC101296995 [Fragaria vesca subsp. vesca]	-1.04512	2.98e-18	3.26588e-17	yes	down		maker-Fvb4-4-snap-gene-61.38	hypothetical protein RchiOBHm_Chr3g0458511 [Rosa chinensis]	3.58588	7.33521e-20	8.66724e-19	yes	up
maker-Fvb7-2-augustus-gene-258.64	PREDICTED: uncharacterized protein LOC101300762 [Fragaria vesca subsp. vesca]	-1.09817	8.41e-25	1.22648e-23	yes	down		augustus_masked-Fvb5-3-processed-gene-62.5	PREDICTED: putative pentatricopeptide repeat-containing protein At1g02420 [Fragaria vesca subsp. vesca]	1.09078	2.54694e-07	1.28588e-06	yes	up
maker-Fvb6-3-augustus-gene-229.35	PREDICTED: ABC transporter G family member 22 isoform X1 [Fragaria vesca subsp. vesca]	-1.52859	1.54e-156	1.99849e-154	yes	down		maker-Fvb6-4-snap-gene-237.56	putative major intrinsic protein [Rosa chinensis]	2.26016	7.16564e-52	2.23586e-50	yes	up
snap_masked-Fvb5-1-processed-gene-52.43	PREDICTED: alpha-mannosidase-like isoform X2 [Fragaria vesca subsp. vesca]	-1.47399	2.87e-09	1.76348e-08	yes	down		maker-Fvb7-2-augustus-gene-256.42	PREDICTED: WD repeat-containing protein WRAP73 isoform X1 [Fragaria vesca subsp. vesca]	1.53038	2.22172e-08	1.25677e-07	yes	up
maker-Fvb6-1-augustus-gene-19.51	protein RST1 isoform X1 [Rosa chinensis]	-1.75095	0.000234466	0.00080332	yes	down		snap_masked-Fvb6-2-processed-gene-48.22	PREDICTED: F-box/kelch-repeat protein At1g15670-like [Fragaria vesca subsp. vesca]	4.63215	3.47847e-12	2.66952e-11	yes	up
maker-Fvb3-3-augustus-gene-26.37	PREDICTED: 3&apos;-N-debenzoyl-2&apos;-deoxytaxol N-benzoyltransferase [Fragaria vesca subsp. vesca]	-4.47061	5.21e-78	2.5618e-76	yes	down		maker-Fvb6-1-augustus-gene-137.26	PREDICTED: GATA transcription factor 9-like [Fragaria vesca subsp. vesca]	2.21682	0.00102834	0.00315627	yes	up
maker-Fvb5-2-augustus-gene-70.40	PREDICTED: receptor-like protein 2 [Fragaria vesca subsp. vesca]	-1.38701	6.45e-09	3.84181e-08	yes	down		maker-Fvb2-4-augustus-gene-154.43	putative glutathione transferase [Rosa chinensis]	1.58282	5.81395e-18	6.28441e-17	yes	up
maker-Fvb5-3-augustus-gene-36.30	PREDICTED: laccase-14-like [Fragaria vesca subsp. vesca]	-1.68512	7.32e-42	1.82204e-40	yes	down		maker-Fvb6-3-snap-gene-59.57	PREDICTED: cellulose synthase-like protein H1 isoform X2 [Fragaria vesca subsp. vesca]	1.50055	0.000248758	0.000848373	yes	up
MSTRG.66236	PREDICTED: glutathione S-transferase DHAR2-like [Fragaria vesca subsp. vesca]	-1.07445	2.07e-06	9.41523e-06	yes	down		MSTRG.64626	putative TIR domain, winged helix-turn-helix DNA-binding domain-containing protein [Rosa chinensis]	2.52086	2.24793e-32	4.25537e-31	yes	up
snap_masked-Fvb7-2-processed-gene-109.21	PREDICTED: probable dimethyladenosine transferase isoform X1 [Fragaria vesca subsp. vesca]	-1.32837	8.33e-46	2.28447e-44	yes	down		MSTRG.56986	PREDICTED: beta-amyrin synthase-like [Fragaria vesca subsp. vesca]	1.09924	1.49653e-68	6.33741e-67	yes	up
maker-Fvb1-2-augustus-gene-38.48	PREDICTED: DEAD-box ATP-dependent RNA helicase 52B-like [Fragaria vesca subsp. vesca]	-1.83963	1.91e-06	8.75459e-06	yes	down		snap_masked-Fvb2-1-processed-gene-158.23	PREDICTED: LRR receptor-like serine/threonine-protein kinase ERL2 [Fragaria vesca subsp. vesca]	1.07461	2.28625e-05	9.11731e-05	yes	up
augustus_masked-Fvb6-1-processed-gene-287.8	PREDICTED: probable pyridoxal 5&apos;-phosphate synthase subunit PDX1 [Fragaria vesca subsp. vesca]	-1.52428	7.29e-10	4.70077e-09	yes	down		maker-Fvb7-4-augustus-gene-221.38	PREDICTED: UPF0235 protein At5g63440 isoform X1 [Fragaria vesca subsp. vesca]	1.79904	6.44392e-07	3.11172e-06	yes	up
MSTRG.23127	PREDICTED: glucose-6-phosphate/phosphate translocator 1, chloroplastic-like [Fragaria vesca subsp. vesca]	-1.3406	2.9e-41	7.10859e-40	yes	down		maker-Fvb6-4-snap-gene-118.48	PREDICTED: RING finger and CHY zinc finger domain-containing protein 1 [Fragaria vesca subsp. vesca]	2.79209	0.00400804	0.0109486	yes	up
augustus_masked-Fvb6-1-processed-gene-341.10	PREDICTED: uncharacterized protein LOC101305683 [Fragaria vesca subsp. vesca]	-4.48422	1.21e-08	7.03199e-08	yes	down		maker-Fvb6-2-snap-gene-198.65	PREDICTED: LOW QUALITY PROTEIN: putative receptor protein kinase ZmPK1 [Fragaria vesca subsp. vesca]	1.46261	2.18552e-06	9.92813e-06	yes	up
maker-Fvb1-3-augustus-gene-10.50	PREDICTED: uncharacterized methyltransferase At2g41040, chloroplastic-like isoform X2 [Fragaria vesca subsp. vesca]	-2.18662	7.65e-174	1.21432e-171	yes	down		augustus_masked-Fvb2-3-processed-gene-164.9	PREDICTED: probable receptor-like protein kinase At2g21480 [Fragaria vesca subsp. vesca]	4.8421	0.00986016	0.0245984	yes	up
maker-Fvb7-2-augustus-gene-271.72	PREDICTED: MADS-box protein SOC1-like isoform X2 [Fragaria vesca subsp. vesca]	-1.59377	1.1e-08	6.41536e-08	yes	down		maker-Fvb6-2-snap-gene-358.56	PREDICTED: aspartic proteinase nepenthesin-2 [Fragaria vesca subsp. vesca]	1.68872	1.34168e-05	5.50633e-05	yes	up
maker-Fvb5-1-augustus-gene-128.43	PREDICTED: serine/threonine-protein kinase SAPK2-like [Fragaria vesca subsp. vesca]	-1.09145	3.74e-31	6.83169e-30	yes	down		augustus_masked-Fvb1-3-processed-gene-62.7	PREDICTED: TMV resistance protein N-like [Fragaria vesca subsp. vesca]	2.51645	3.38277e-05	0.000131531	yes	up
maker-Fvb6-3-snap-gene-260.37	PREDICTED: uncharacterized protein LOC101293610 isoform X1 [Fragaria vesca subsp. vesca]	-1.77876	4.26e-194	8.1633e-192	yes	down		maker-Fvb7-4-augustus-gene-102.39	mitochondrial adenine nucleotide transporter ADNT1 [Rosa chinensis]	1.041	4.22104e-43	1.08775e-41	yes	up
maker-Fvb4-3-augustus-gene-62.49	PREDICTED: pirin-like protein [Fragaria vesca subsp. vesca]	-1.38907	5.37e-24	7.59089e-23	yes	down		maker-Fvb1-2-augustus-gene-71.72	uncharacterized protein LOC112188167 [Rosa chinensis]	1.49115	0.00210378	0.00608458	yes	up
maker-Fvb1-1-augustus-gene-172.39	PREDICTED: E3 ubiquitin-protein ligase FANCL isoform X1 [Fragaria vesca subsp. vesca]	-1.45117	0.000229254	0.000786505	yes	down		maker-Fvb2-1-snap-gene-124.53	PREDICTED: uncharacterized protein LOC101294522 [Fragaria vesca subsp. vesca]	1.19072	2.67613e-05	0.000105614	yes	up
maker-Fvb6-1-snap-gene-205.55	PREDICTED: UDP-glycosyltransferase 73C1-like [Fragaria vesca subsp. vesca]	-1.14307	2.65e-20	3.20256e-19	yes	down		maker-Fvb6-3-augustus-gene-412.63	PREDICTED: TMV resistance protein N-like isoform X1 [Fragaria vesca subsp. vesca]	3.97066	4.68241e-58	1.65679e-56	yes	up
maker-Fvb3-1-snap-gene-308.73	cardiolipin synthase (CMP-forming), mitochondrial [Prunus persica]	-1.11003	2.52e-08	1.41803e-07	yes	down		augustus_masked-Fvb2-1-processed-gene-154.1	PREDICTED: antifungal protein ginkbilobin-2-like [Fragaria vesca subsp. vesca]	1.48624	0.000579835	0.00186308	yes	up
MSTRG.18445	PREDICTED: uncharacterized protein LOC101309135 [Fragaria vesca subsp. vesca]	-1.59726	1.26e-89	7.52983e-88	yes	down		maker-Fvb2-4-augustus-gene-237.38	PREDICTED: phospholipase SGR2 [Fragaria vesca subsp. vesca]	1.22771	1.68733e-30	3.01817e-29	yes	up
MSTRG.47807	PREDICTED: sodium/hydrogen exchanger 1-like [Fragaria vesca subsp. vesca]	-1.70265	7.01e-35	1.43948e-33	yes	down		MSTRG.12515	PREDICTED: protein RADIALIS-like 3 [Fragaria vesca subsp. vesca]	1.9201	3.76251e-06	1.66136e-05	yes	up
maker-Fvb7-1-augustus-gene-124.24	PREDICTED: protein ECERIFERUM 1-like [Fragaria vesca subsp. vesca]	-2.51082	4.7e-75	2.21207e-73	yes	down		maker-Fvb4-3-augustus-gene-131.39	PREDICTED: major allergen Mal d 1-like [Fragaria vesca subsp. vesca]	4.12433	9.0435e-42	2.24368e-40	yes	up
maker-Fvb6-2-augustus-gene-146.23	PREDICTED: protein trichome birefringence-like 8 [Fragaria vesca subsp. vesca]	-2.54944	3.16e-23	4.33852e-22	yes	down		maker-Fvb6-4-snap-gene-318.67	PREDICTED: G-type lectin S-receptor-like serine/threonine-protein kinase At4g03230 isoform X1 [Fragaria vesca subsp. vesca]	1.79346	8.57771e-21	1.05956e-19	yes	up
augustus_masked-Fvb5-3-processed-gene-197.10	PREDICTED: malate dehydrogenase, chloroplastic [Fragaria vesca subsp. vesca]	-1.36625	8.75e-83	4.66361e-81	yes	down		MSTRG.14387	PREDICTED: U-box domain-containing protein 26 [Fragaria vesca subsp. vesca]	1.43101	4.57781e-25	6.74906e-24	yes	up
augustus_masked-Fvb2-4-processed-gene-81.4	PREDICTED: leucine-rich repeat extensin-like protein 1 [Fragaria vesca subsp. vesca]	-1.83169	1.25e-11	9.20297e-11	yes	down		maker-Fvb5-1-augustus-gene-128.39	PREDICTED: flavonol synthase 3-like [Fragaria vesca subsp. vesca]	1.88561	7.52298e-114	6.08427e-112	yes	up
maker-Fvb1-4-snap-gene-14.89	PREDICTED: SPX domain-containing protein 1-like [Fragaria vesca subsp. vesca]	-1.48518	5.65e-33	1.0886e-31	yes	down		maker-Fvb2-2-augustus-gene-91.33	PREDICTED: U-box domain-containing protein 9 [Fragaria vesca subsp. vesca]	1.15258	1.19836e-19	1.39901e-18	yes	up
maker-Fvb2-2-augustus-gene-43.49	PREDICTED: probable polygalacturonase isoform X2 [Fragaria vesca subsp. vesca]	-1.81369	2.21e-12	1.71732e-11	yes	down		maker-Fvb6-1-augustus-gene-59.58	PREDICTED: xyloglucan endotransglucosylase/hydrolase protein 9 [Fragaria vesca subsp. vesca]	1.27295	7.5983e-06	3.22673e-05	yes	up
maker-Fvb3-1-augustus-gene-263.52	PREDICTED: fatty acid 2-hydroxylase 1-like [Fragaria vesca subsp. vesca]	-1.60703	1.42e-17	1.50749e-16	yes	down		maker-Fvb7-1-augustus-gene-257.37	PREDICTED: uncharacterized protein At2g39920 [Fragaria vesca subsp. vesca]	1.48542	1.98225e-12	1.54855e-11	yes	up
maker-Fvb3-4-augustus-gene-93.22	PREDICTED: uncharacterized membrane protein At1g06890 [Fragaria vesca subsp. vesca]	-1.21024	0.00555467	0.0146699	yes	down		snap_masked-Fvb4-4-processed-gene-18.29	PREDICTED: protein PLANT CADMIUM RESISTANCE 2-like [Fragaria vesca subsp. vesca]	2.82762	0.0126746	0.0307523	yes	up
maker-Fvb1-4-augustus-gene-12.65	PREDICTED: uncharacterized protein LOC101303735 [Fragaria vesca subsp. vesca]	-1.3984	3.29e-27	5.26694e-26	yes	down		augustus_masked-Fvb5-3-processed-gene-236.2	PREDICTED: uncharacterized protein LOC105353525 [Fragaria vesca subsp. vesca]	3.44965	0.000206344	0.000713118	yes	up
maker-Fvb4-4-augustus-gene-113.19	PREDICTED: probable serine/threonine-protein kinase At1g54610 [Fragaria vesca subsp. vesca]	-1.1838	4.67e-05	0.00017816	yes	down		augustus_masked-Fvb2-2-processed-gene-112.10	PREDICTED: 3-hydroxy-3-methylglutaryl-coenzyme A reductase 1-like [Fragaria vesca subsp. vesca]	4.98001	0	0	yes	up
maker-Fvb3-3-snap-gene-170.41	PREDICTED: NAD(H) kinase 1 [Fragaria vesca subsp. vesca]	-1.34741	2.39e-57	8.35961e-56	yes	down		maker-Fvb7-2-augustus-gene-293.64	PREDICTED: dof zinc finger protein DOF2.4 isoform X1 [Fragaria vesca subsp. vesca]	1.36702	0.000236374	0.000809398	yes	up
snap_masked-Fvb4-3-processed-gene-267.27	PREDICTED: uncharacterized protein LOC101314536 isoform X1 [Fragaria vesca subsp. vesca]	-1.27753	1.04e-101	7.33331e-100	yes	down		maker-Fvb3-1-augustus-gene-283.37	PREDICTED: cyclic phosphodiesterase-like [Fragaria vesca subsp. vesca]	2.09524	9.70134e-10	6.20285e-09	yes	up
snap_masked-Fvb5-2-processed-gene-120.31	PREDICTED: F-box/kelch-repeat protein SKIP6 [Fragaria vesca subsp. vesca]	-1.51785	0.000106459	0.00038471	yes	down		maker-Fvb7-1-augustus-gene-194.32	PREDICTED: BAG family molecular chaperone regulator 6 isoform X1 [Fragaria vesca subsp. vesca]	1.46668	1.54581e-97	1.03184e-95	yes	up
maker-Fvb5-4-augustus-gene-31.38	PREDICTED: triose phosphate/phosphate translocator, non-green plastid, chloroplastic [Fragaria vesca subsp. vesca]	-1.57834	2.84e-54	9.32923e-53	yes	down		augustus_masked-Fvb1-4-processed-gene-143.7	PREDICTED: cell wall / vacuolar inhibitor of fructosidase 2 [Fragaria vesca subsp. vesca]	2.56916	2.49064e-25	3.71488e-24	yes	up
maker-Fvb7-3-snap-gene-174.42	PREDICTED: fatty acyl-CoA reductase 3-like [Fragaria vesca subsp. vesca]	-2.29829	0.00930624	0.0233652	yes	down		MSTRG.61385	putative hydroquinone glucosyltransferase [Rosa chinensis]	1.96634	1.77178e-05	7.15609e-05	yes	up
maker-Fvb1-2-augustus-gene-39.60	PREDICTED: ethylene-responsive transcription factor WIN1-like [Fragaria vesca subsp. vesca]	-2.5225	0.0039751	0.0108661	yes	down		maker-Fvb1-3-augustus-gene-167.24	PREDICTED: GDP-mannose transporter GONST1 [Fragaria vesca subsp. vesca]	1.54296	8.13035e-166	1.17084e-163	yes	up
snap_masked-Fvb3-2-processed-gene-97.24	PREDICTED: cytochrome P450 72A15-like [Fragaria vesca subsp. vesca]	-1.06093	6.01e-123	5.38805e-121	yes	down		maker-Fvb4-2-snap-gene-51.77	PREDICTED: uncharacterized protein LOC101308084 [Fragaria vesca subsp. vesca]	1.10689	6.72108e-07	3.23865e-06	yes	up
maker-Fvb3-2-snap-gene-278.59	PREDICTED: trafficking protein particle complex subunit 13 [Fragaria vesca subsp. vesca]	-2.14354	0.000188457	0.000655981	yes	down		MSTRG.23728	PREDICTED: interactor of constitutive active ROPs 3 [Fragaria vesca subsp. vesca]	1.18325	3.18217e-25	4.7145e-24	yes	up
maker-Fvb4-4-augustus-gene-44.42	PREDICTED: transcription factor bHLH30 [Fragaria vesca subsp. vesca]	-1.02018	3.81e-05	0.000147042	yes	down		MSTRG.25544	PREDICTED: photosystem I subunit O [Fragaria vesca subsp. vesca]	1.54409	3.13744e-273	1.0372e-270	yes	up
MSTRG.31182	PREDICTED: LOW QUALITY PROTEIN: uncharacterized protein LOC105351079 [Fragaria vesca subsp. vesca]	-1.28525	1.1e-06	5.18302e-06	yes	down		maker-Fvb3-2-augustus-gene-272.29	PREDICTED: probable protein phosphatase 2C 25 [Fragaria vesca subsp. vesca]	2.29073	9.47821e-56	3.20114e-54	yes	up
maker-Fvb6-4-snap-gene-106.49	PREDICTED: L-ascorbate peroxidase 2, cytosolic-like [Fragaria vesca subsp. vesca]	-1.92307	1.02e-06	4.83791e-06	yes	down		maker-Fvb5-4-augustus-gene-205.11	PREDICTED: receptor-like protein kinase HAIKU2 [Fragaria vesca subsp. vesca]	1.13439	6.34092e-40	1.50792e-38	yes	up
maker-Fvb6-4-augustus-gene-180.29	glucan endo-1,3-beta-glucosidase, basic isoform-like [Rosa chinensis]	-1.84397	1.62e-61	6.10913e-60	yes	down		maker-Fvb4-3-augustus-gene-100.46	uncharacterized protein LOC112196626 [Rosa chinensis]	3.99476	3.40049e-15	3.1735e-14	yes	up
maker-Fvb3-2-augustus-gene-145.31	PREDICTED: ferritin-4, chloroplastic [Fragaria vesca subsp. vesca]	-1.12165	2.6e-25	3.86955e-24	yes	down		augustus_masked-Fvb3-2-processed-gene-97.7	PREDICTED: mediator of RNA polymerase II transcription subunit 19a-like [Fragaria vesca subsp. vesca]	2.07588	2.20453e-23	3.04404e-22	yes	up
maker-Fvb6-3-augustus-gene-19.28	polygalacturonase At1g48100 isoform X2 [Rosa chinensis]	-1.3154	1.91e-10	1.28796e-09	yes	down		maker-Fvb6-3-snap-gene-109.35	PREDICTED: protein FLUORESCENT IN BLUE LIGHT, chloroplastic isoform X1 [Fragaria vesca subsp. vesca]	1.16771	5.04697e-07	2.46766e-06	yes	up
maker-Fvb7-1-augustus-gene-189.37	PREDICTED: calmodulin-binding receptor-like cytoplasmic kinase 2 [Fragaria vesca subsp. vesca]	-1.15679	1.61e-06	7.41407e-06	yes	down		maker-Fvb3-4-snap-gene-201.57	PREDICTED: epidermis-specific secreted glycoprotein EP1-like [Fragaria vesca subsp. vesca]	3.20193	1.70033e-33	3.33227e-32	yes	up
maker-Fvb7-1-augustus-gene-290.59	PREDICTED: beta-carotene hydroxylase 2, chloroplastic-like [Fragaria vesca subsp. vesca]	-1.5341	4.42e-84	2.42326e-82	yes	down		augustus_masked-Fvb3-4-processed-gene-225.10	PREDICTED: organic cation/carnitine transporter 3-like [Fragaria vesca subsp. vesca]	1.2262	0.00229625	0.00659594	yes	up
maker-Fvb6-2-snap-gene-253.79	PREDICTED: WD repeat-containing protein 48 [Fragaria vesca subsp. vesca]	-1.13114	6.68e-109	5.11185e-107	yes	down		augustus_masked-Fvb4-2-processed-gene-23.6	PREDICTED: serine carboxypeptidase-like 50 [Fragaria vesca subsp. vesca]	1.75305	1.70936e-29	2.96166e-28	yes	up
maker-Fvb7-1-augustus-gene-223.29	transcriptional activator Myb [Fragaria vesca]	-1.50786	1.75e-05	7.08971e-05	yes	down		augustus_masked-Fvb5-1-processed-gene-173.6	PREDICTED: flowering time control protein FY-like [Fragaria vesca subsp. vesca]	2.79035	5.40272e-42	1.35226e-40	yes	up
augustus_masked-Fvb4-4-processed-gene-2.3	PREDICTED: DNA-damage-repair/toleration protein DRT100 [Fragaria vesca subsp. vesca]	-2.4018	8.85e-05	0.000323976	yes	down		augustus_masked-Fvb7-2-processed-gene-159.9	PREDICTED: putative lipid-binding protein At4g00165 [Fragaria vesca subsp. vesca]	1.18153	1.24807e-24	1.80825e-23	yes	up
maker-Fvb1-1-snap-gene-183.40	cytochrome P450 81E8-like [Rosa chinensis]	-3.4961	4.93e-63	1.92288e-61	yes	down		MSTRG.45174	PREDICTED: uncharacterized protein LOC101293506 [Fragaria vesca subsp. vesca]	1.04867	5.04708e-49	1.48383e-47	yes	up
maker-Fvb3-2-snap-gene-186.41	PREDICTED: pseudouridine-metabolizing bifunctional protein C1861.05 [Fragaria vesca subsp. vesca]	-1.07378	4.2e-21	5.27377e-20	yes	down		augustus_masked-Fvb3-1-processed-gene-160.5	PREDICTED: probable CCR4-associated factor 1 homolog 11 [Fragaria vesca subsp. vesca]	3.74052	2.29067e-28	3.82119e-27	yes	up
snap_masked-Fvb3-4-processed-gene-53.33	PREDICTED: alpha-glucan phosphorylase, H isozyme [Fragaria vesca subsp. vesca]	-2.50067	0	0	yes	down		augustus_masked-Fvb3-2-processed-gene-121.2	PREDICTED: uncharacterized protein LOC105350158 [Fragaria vesca subsp. vesca]	2.24023	0.000190574	0.000662866	yes	up
MSTRG.56999	PREDICTED: probable mitochondrial adenine nucleotide transporter BTL1 [Fragaria vesca subsp. vesca]	-1.09983	0.000576292	0.00185209	yes	down		maker-Fvb2-4-augustus-gene-88.26	LEAF RUST 10 DISEASE-RESISTANCE LOCUS RECEPTOR-LIKE PROTEIN KINASE-like 1.4 isoform X4 [Rosa chinensis]	1.07503	7.74054e-16	7.48048e-15	yes	up
maker-Fvb1-4-augustus-gene-19.46	PREDICTED: heparanase-like protein 3 [Fragaria vesca subsp. vesca]	-1.12786	1.42e-07	7.36965e-07	yes	down		maker-Fvb4-4-augustus-gene-99.43	PREDICTED: major allergen Pru ar 1-like [Fragaria vesca subsp. vesca]	1.44811	5.79773e-111	4.57062e-109	yes	up
maker-Fvb2-3-snap-gene-189.50	PREDICTED: protein DJ-1 homolog C [Fragaria vesca subsp. vesca]	-1.07021	8.96e-08	4.75158e-07	yes	down		maker-Fvb6-4-augustus-gene-35.53	PREDICTED: auxin-responsive protein IAA16 [Fragaria vesca subsp. vesca]	1.0151	1.52904e-58	5.4809e-57	yes	up
maker-Fvb3-4-augustus-gene-50.57	protein DAMAGED DNA-BINDING 2 [Rosa chinensis]	-2.7637	5.24e-244	1.48888e-241	yes	down		augustus_masked-Fvb6-2-processed-gene-28.0	PREDICTED: uncharacterized protein LOC101302578 [Fragaria vesca subsp. vesca]	1.03713	1.75879e-05	7.10681e-05	yes	up
augustus_masked-Fvb6-1-processed-gene-134.13	PREDICTED: putative white-brown complex homolog protein 30 [Fragaria vesca subsp. vesca]	-1.05713	0.000303624	0.00102039	yes	down		maker-Fvb2-4-augustus-gene-74.36	PREDICTED: squalene synthase-like isoform X1 [Fragaria vesca subsp. vesca]	1.1415	2.9388e-42	7.40679e-41	yes	up
maker-Fvb3-1-augustus-gene-76.16	PREDICTED: ethylene-responsive transcription factor RAP2-7-like isoform X1 [Fragaria vesca subsp. vesca]	-1.13205	9.66e-50	2.89011e-48	yes	down		maker-Fvb1-4-augustus-gene-53.63	PREDICTED: GDSL esterase/lipase EXL3-like [Fragaria vesca subsp. vesca]	1.04034	0.00336026	0.00932267	yes	up
maker-Fvb4-3-snap-gene-7.52	PREDICTED: probable potassium transporter 17 [Fragaria vesca subsp. vesca]	-1.42559	1.03e-12	8.18635e-12	yes	down		maker-Fvb7-1-augustus-gene-65.14	PREDICTED: glycosyltransferase family protein 64 protein C5 [Fragaria vesca subsp. vesca]	1.67599	4.21769e-09	2.55803e-08	yes	up
maker-Fvb6-3-snap-gene-373.52	PREDICTED: transcription factor bHLH147-like [Fragaria vesca subsp. vesca]	-2.50208	3.41e-232	9.19488e-230	yes	down		maker-Fvb5-1-snap-gene-290.74	putative P-loop containing nucleoside triphosphate hydrolase, leucine-rich repeat domain, L [Rosa chinensis]	6.52128	1.05598e-08	6.16946e-08	yes	up
maker-Fvb1-2-snap-gene-216.27	PREDICTED: glutathione S-transferase F11-like [Fragaria vesca subsp. vesca]	-4.17221	0.000539844	0.00174336	yes	down		maker-Fvb7-4-snap-gene-117.58	PREDICTED: proline-rich protein HaeIII subfamily 1-like [Fragaria vesca subsp. vesca]	1.00655	8.17238e-48	2.34334e-46	yes	up
maker-Fvb2-4-augustus-gene-260.50	PREDICTED: random slug protein 5 [Fragaria vesca subsp. vesca]	-1.09443	2.99e-71	1.32182e-69	yes	down		snap_masked-Fvb3-1-processed-gene-200.25	hypothetical protein RchiOBHm_Chr5g0034161 [Rosa chinensis]	1.41553	0.0117948	0.0288441	yes	up
maker-Fvb4-3-augustus-gene-122.25	hypothetical protein RchiOBHm_Chr4g0426141 [Rosa chinensis]	-1.60566	1.6e-11	1.17233e-10	yes	down		maker-Fvb6-1-augustus-gene-273.46	PREDICTED: tropinone reductase homolog [Fragaria vesca subsp. vesca]	2.45659	7.72339e-20	9.1164e-19	yes	up
maker-Fvb3-3-augustus-gene-221.30	cytosolic ascorbate peroxidase [Fragaria x ananassa]	-1.98415	0	0	yes	down		maker-Fvb6-1-augustus-gene-38.63	PREDICTED: putative disease resistance protein RGA3 [Fragaria vesca subsp. vesca]	2.03627	4.49074e-09	2.71437e-08	yes	up
MSTRG.8177	PREDICTED: uncharacterized protein LOC101292460 [Fragaria vesca subsp. vesca]	-3.68002	1.96e-26	3.04591e-25	yes	down		maker-Fvb6-1-augustus-gene-54.51	PREDICTED: LOB domain-containing protein 41-like [Fragaria vesca subsp. vesca]	2.9736	2.01141e-05	8.07533e-05	yes	up
augustus_masked-Fvb4-4-processed-gene-45.8	PREDICTED: protein ASPARTIC PROTEASE IN GUARD CELL 1 [Fragaria vesca subsp. vesca]	-1.19682	2.64e-08	1.48007e-07	yes	down		snap_masked-Fvb2-1-processed-gene-102.20	RING-H2 finger protein ATL8-like [Rosa chinensis]	1.52101	0.000498555	0.00162008	yes	up
maker-Fvb2-1-augustus-gene-137.32	PREDICTED: serine/threonine-protein kinase 38-like [Fragaria vesca subsp. vesca]	-2.14275	5.59e-222	1.3265e-219	yes	down		maker-Fvb3-3-snap-gene-171.52	PREDICTED: titin isoform X1 [Fragaria vesca subsp. vesca]	3.43043	0.000540094	0.00174398	yes	up
maker-Fvb2-2-augustus-gene-113.39	PREDICTED: uncharacterized protein At1g04910 [Fragaria vesca subsp. vesca]	-1.56597	0.00429585	0.0116629	yes	down		maker-Fvb3-3-augustus-gene-2.37	PREDICTED: uncharacterized protein LOC101311253 [Fragaria vesca subsp. vesca]	1.31279	1.55507e-05	6.32426e-05	yes	up
maker-Fvb2-2-snap-gene-89.58	PREDICTED: putative quinone-oxidoreductase homolog, chloroplastic [Fragaria vesca subsp. vesca]	-2.11736	1.83e-223	4.43809e-221	yes	down		maker-Fvb4-4-augustus-gene-0.39	PREDICTED: dnaJ homolog subfamily B member 1-like [Fragaria vesca subsp. vesca]	1.08639	0.000415392	0.00136769	yes	up
MSTRG.16151	PREDICTED: pentatricopeptide repeat-containing protein At4g08210 [Fragaria vesca subsp. vesca]	-1.47961	1.17e-26	1.84392e-25	yes	down		maker-Fvb6-3-augustus-gene-422.38	PREDICTED: probable receptor-like protein kinase At1g67000 [Fragaria vesca subsp. vesca]	1.46701	0.000213461	0.000735873	yes	up
maker-Fvb6-4-augustus-gene-65.31	PREDICTED: mitogen-activated protein kinase 12-like [Fragaria vesca subsp. vesca]	-1.26332	5.32e-11	3.74103e-10	yes	down		maker-Fvb2-4-snap-gene-123.59	PREDICTED: L-ascorbate oxidase homolog [Fragaria vesca subsp. vesca]	2.00236	2.57683e-08	1.44815e-07	yes	up
maker-Fvb5-4-augustus-gene-48.73	PREDICTED: succinate dehydrogenase assembly factor 2, mitochondrial [Fragaria vesca subsp. vesca]	-1.17825	2.48e-16	2.46032e-15	yes	down		snap_masked-Fvb6-4-processed-gene-321.26	PREDICTED: protein FAR1-RELATED SEQUENCE 5-like [Fragaria vesca subsp. vesca]	1.52835	3.13583e-05	0.000122487	yes	up
maker-Fvb3-3-augustus-gene-243.47	PREDICTED: methylsterol monooxygenase 2-2 isoform X1 [Fragaria vesca subsp. vesca]	-2.29554	5.01e-100	3.44725e-98	yes	down		augustus_masked-Fvb6-2-processed-gene-198.10	PREDICTED: putative receptor protein kinase ZmPK1 [Fragaria vesca subsp. vesca]	1.56415	6.81233e-34	1.35381e-32	yes	up
maker-Fvb5-3-augustus-gene-25.38	PREDICTED: 14-3-3 protein 7-like [Fragaria vesca subsp. vesca]	-1.14916	2.5e-95	1.63171e-93	yes	down		augustus_masked-Fvb6-1-processed-gene-0.0	PREDICTED: G-type lectin S-receptor-like serine/threonine-protein kinase At4g03230 isoform X4 [Fragaria vesca subsp. vesca]	2.76309	7.43923e-07	3.57235e-06	yes	up
maker-Fvb1-3-snap-gene-202.30	PREDICTED: kinetochore protein NDC80 homolog [Fragaria vesca subsp. vesca]	-1.97031	1.73e-43	4.49861e-42	yes	down		maker-Fvb5-2-snap-gene-62.28	PREDICTED: gibberellin-regulated protein 6 [Fragaria vesca subsp. vesca]	1.20017	4.69419e-23	6.38637e-22	yes	up
maker-Fvb5-1-augustus-gene-162.29	PREDICTED: ubiquinol oxidase 2, mitochondrial [Fragaria vesca subsp. vesca]	-2.52263	1.39e-30	2.49157e-29	yes	down		maker-Fvb5-2-augustus-gene-49.51	PREDICTED: acyl carrier protein 1, chloroplastic-like [Fragaria vesca subsp. vesca]	1.06109	2.99403e-49	8.85702e-48	yes	up
maker-Fvb1-3-snap-gene-80.44	PREDICTED: probable vacuolar amino acid transporter YPQ2 isoform X2 [Fragaria vesca subsp. vesca]	-1.02367	2.6e-15	2.44042e-14	yes	down		maker-Fvb5-4-augustus-gene-64.45	PREDICTED: thioredoxin-like 1-2, chloroplastic [Fragaria vesca subsp. vesca]	1.52146	1.5681e-05	6.37179e-05	yes	up
maker-Fvb2-4-augustus-gene-197.38	PREDICTED: two-component response regulator ARR8-like [Fragaria vesca subsp. vesca]	-1.41626	5.93e-13	4.81279e-12	yes	down		maker-Fvb6-1-augustus-gene-106.54	PREDICTED: transcription factor CPC-like [Fragaria vesca subsp. vesca]	1.1076	2.40898e-23	3.31875e-22	yes	up
augustus_masked-Fvb4-2-processed-gene-49.5	PREDICTED: E3 ubiquitin-protein ligase RHA2A [Fragaria vesca subsp. vesca]	-1.08858	9.09e-09	5.3424e-08	yes	down		snap_masked-Fvb2-3-processed-gene-65.38	PREDICTED: uncharacterized protein LOC105350612 [Fragaria vesca subsp. vesca]	4.96539	0.00343655	0.00951479	yes	up
maker-Fvb3-4-snap-gene-170.59	PREDICTED: (-)-germacrene D synthase-like isoform X2 [Fragaria vesca subsp. vesca]	-1.96089	0.000886234	0.00275304	yes	down		augustus_masked-Fvb1-2-processed-gene-19.7	PREDICTED: multiprotein-bridging factor 1c [Fragaria vesca subsp. vesca]	2.60964	3.93744e-08	2.1651e-07	yes	up
maker-Fvb5-1-augustus-gene-41.70	putative PB1 domain-containing protein [Rosa chinensis]	-2.18562	0.00667366	0.0173147	yes	down		maker-Fvb1-1-augustus-gene-88.27	PREDICTED: galactinol synthase 2-like [Fragaria vesca subsp. vesca]	1.80087	5.59575e-06	2.42104e-05	yes	up
maker-Fvb2-2-snap-gene-160.47	PREDICTED: probable DNA helicase MCM9 [Fragaria vesca subsp. vesca]	-1.86095	3.15e-06	1.40406e-05	yes	down		maker-Fvb4-1-augustus-gene-176.39	PREDICTED: probable LRR receptor-like serine/threonine-protein kinase At1g14390 [Fragaria vesca subsp. vesca]	1.61307	3.97816e-15	3.69548e-14	yes	up
augustus_masked-Fvb4-1-processed-gene-187.13	PREDICTED: 21 kDa protein [Fragaria vesca subsp. vesca]	-1.93846	2.8e-09	1.72508e-08	yes	down		maker-Fvb2-2-snap-gene-23.41	PREDICTED: putative receptor-like protein kinase At4g00960 isoform X1 [Fragaria vesca subsp. vesca]	1.8053	0.00969076	0.0242266	yes	up
maker-Fvb4-2-augustus-gene-125.23	PREDICTED: non-specific lipid transfer protein GPI-anchored 2 [Fragaria vesca subsp. vesca]	-3.14805	0.0164713	0.0387901	yes	down		maker-Fvb5-1-augustus-gene-235.26	PREDICTED: chlorophyll a-b binding protein CP24 10A, chloroplastic [Fragaria vesca subsp. vesca]	1.1678	5.28192e-113	4.234e-111	yes	up
maker-Fvb5-2-augustus-gene-47.47	PREDICTED: HVA22-like protein e [Fragaria vesca subsp. vesca]	-1.53057	2.28e-64	9.01147e-63	yes	down		maker-Fvb4-2-augustus-gene-73.40	WRKY DNA binding protein [Fragaria x ananassa]	2.00128	1.72368e-05	6.97487e-05	yes	up
maker-Fvb4-3-snap-gene-87.56	PREDICTED: 2-phytyl-1,4-beta-naphthoquinone methyltransferase, chloroplastic isoform X3 [Fragaria vesca subsp. vesca]	-1.32538	2.1e-07	1.06946e-06	yes	down		snap_masked-Fvb6-3-processed-gene-36.22	PREDICTED: alpha-1,4 glucan phosphorylase L isozyme, chloroplastic/amyloplastic-like [Fragaria vesca subsp. vesca]	1.06297	3.05128e-57	1.0614e-55	yes	up
MSTRG.43927	PREDICTED: protein FAR1-RELATED SEQUENCE 5-like [Fragaria vesca subsp. vesca]	-2.83285	0.0101914	0.0253299	yes	down		MSTRG.56466	PREDICTED: basic leucine zipper 34 [Fragaria vesca subsp. vesca]	2.75304	4.88195e-82	2.58e-80	yes	up
MSTRG.40184	PREDICTED: ubiquitin-activating enzyme E1 1-like [Fragaria vesca subsp. vesca]	-1.00755	7.27e-06	3.09554e-05	yes	down		MSTRG.62824	PREDICTED: heat shock protein 83 [Fragaria vesca subsp. vesca]	2.70985	0	0	yes	up
maker-Fvb5-1-augustus-gene-86.50	PREDICTED: protein SPIRAL1-like 2 [Fragaria vesca subsp. vesca]	-2.71465	1.08e-264	3.45316e-262	yes	down		maker-Fvb5-4-augustus-gene-0.34	PREDICTED: protein NRT1/ PTR FAMILY 6.3 isoform X1 [Fragaria vesca subsp. vesca]	2.28806	7.16064e-57	2.47375e-55	yes	up
maker-Fvb2-1-augustus-gene-133.31	PREDICTED: tyrosine decarboxylase 1 [Fragaria vesca subsp. vesca]	-1.86427	1.79e-21	2.27665e-20	yes	down		augustus_masked-Fvb5-1-processed-gene-70.10	PREDICTED: probable methyltransferase PMT18 [Fragaria vesca subsp. vesca]	2.14435	7.29257e-78	3.57064e-76	yes	up
maker-Fvb2-3-augustus-gene-239.62	PREDICTED: amino acid permease 4-like [Fragaria vesca subsp. vesca]	-1.12681	5.69e-16	5.53899e-15	yes	down		maker-Fvb5-1-augustus-gene-36.57	PREDICTED: probable inactive receptor kinase At2g26730 [Fragaria vesca subsp. vesca]	3.34702	0.0191636	0.0443693	yes	up
maker-Fvb7-3-augustus-gene-68.60	PREDICTED: folylpolyglutamate synthase [Fragaria vesca subsp. vesca]	-1.00695	2.49e-12	1.92934e-11	yes	down		maker-Fvb4-2-augustus-gene-28.36	CLK4-associating serine/arginine rich protein isoform X4 [Rosa chinensis]	1.97939	0.0205606	0.0472043	yes	up
maker-Fvb1-1-augustus-gene-226.60	PREDICTED: ankyrin repeat-containing protein At3g12360-like [Fragaria vesca subsp. vesca]	-3.94198	0.0201229	0.0463132	yes	down		augustus_masked-Fvb6-1-processed-gene-291.6	PREDICTED: BAHD acyltransferase DCR [Fragaria vesca subsp. vesca]	1.84883	5.74544e-06	2.48165e-05	yes	up
maker-Fvb2-3-augustus-gene-117.39	PREDICTED: mechanosensitive ion channel protein 6-like [Fragaria vesca subsp. vesca]	-1.24521	9.96e-05	0.00036144	yes	down		maker-Fvb4-3-snap-gene-208.42	PREDICTED: transcription factor bHLH113 [Fragaria vesca subsp. vesca]	2.53626	0.00705043	0.0181984	yes	up
MSTRG.63737	PREDICTED: uncharacterized protein LOC101298945 [Fragaria vesca subsp. vesca]	-6.36427	5.18e-27	8.22686e-26	yes	down		maker-Fvb5-2-augustus-gene-114.40	PREDICTED: RING-H2 finger protein ATL22-like isoform X1 [Fragaria vesca subsp. vesca]	1.1405	4.40909e-07	2.17037e-06	yes	up
maker-Fvb5-4-snap-gene-123.49	PREDICTED: alpha/beta hydrolase domain-containing protein 17B [Fragaria vesca subsp. vesca]	-1.93732	0.000195543	0.000678742	yes	down		maker-Fvb6-1-augustus-gene-261.40	PREDICTED: serine/threonine-protein kinase CDL1 [Fragaria vesca subsp. vesca]	1.21223	2.40858e-32	4.55664e-31	yes	up
maker-Fvb3-4-augustus-gene-208.58	uncharacterized protein LOC112203441 [Rosa chinensis]	-1.06045	3.93e-10	2.59149e-09	yes	down		MSTRG.8729	PREDICTED: 3-hydroxy-3-methylglutaryl-coenzyme A reductase 1-like [Fragaria vesca subsp. vesca]	4.43132	7.93219e-53	2.51754e-51	yes	up
maker-Fvb2-4-snap-gene-232.59	PREDICTED: probable carbohydrate esterase At4g34215 [Fragaria vesca subsp. vesca]	-2.30192	5.18e-165	7.38048e-163	yes	down		maker-Fvb6-2-augustus-gene-274.46	PREDICTED: uncharacterized protein LOC101301892 [Fragaria vesca subsp. vesca]	1.27789	2.75545e-12	2.13144e-11	yes	up
maker-Fvb5-1-snap-gene-296.59	PREDICTED: uncharacterized protein LOC101307212 [Fragaria vesca subsp. vesca]	-1.9159	5.23e-06	2.27452e-05	yes	down		MSTRG.45417	PREDICTED: cyclic nucleotide-gated ion channel 1-like [Fragaria vesca subsp. vesca]	1.09986	4.92629e-82	2.6004e-80	yes	up
maker-Fvb1-3-snap-gene-21.75	PREDICTED: probable chlorophyll(ide) b reductase NYC1, chloroplastic [Fragaria vesca subsp. vesca]	-1.37656	2.25e-182	3.85533e-180	yes	down		augustus_masked-Fvb3-2-processed-gene-47.2	PREDICTED: ethylene-responsive transcription factor 4 [Fragaria vesca subsp. vesca]	1.79839	4.13575e-36	8.8146e-35	yes	up
maker-Fvb3-3-augustus-gene-265.35	PREDICTED: trans-cinnamate 4-monooxygenase [Fragaria vesca subsp. vesca]	-2.42023	3.78e-209	8.13664e-207	yes	down		maker-Fvb3-2-augustus-gene-45.49	PREDICTED: anthocyanidin 3-O-glucoside 2&apos;&apos;-O-glucosyltransferase-like [Fragaria vesca subsp. vesca]	3.69056	0.0204696	0.0470301	yes	up
maker-Fvb2-1-augustus-gene-165.45	PREDICTED: ABC transporter C family member 14 [Fragaria vesca subsp. vesca]	-1.35474	7.18e-199	1.43187e-196	yes	down		maker-Fvb6-1-snap-gene-196.36	PREDICTED: cleavage stimulating factor 64-like [Fragaria vesca subsp. vesca]	1.46965	4.32028e-14	3.76973e-13	yes	up
augustus_masked-Fvb7-3-processed-gene-26.11	PREDICTED: ethylene-responsive transcription factor CRF4 [Fragaria vesca subsp. vesca]	-3.35296	0.0070453	0.0181856	yes	down		MSTRG.39801	--	1.24922	9.37132e-08	4.96237e-07	yes	up
snap_masked-Fvb6-2-processed-gene-135.34	PREDICTED: uncharacterized protein LOC101295551 [Fragaria vesca subsp. vesca]	-1.67906	0.0147328	0.0351493	yes	down		augustus_masked-Fvb2-1-processed-gene-253.6	PREDICTED: galactose oxidase-like [Fragaria vesca subsp. vesca]	1.31861	1.72324e-06	7.93436e-06	yes	up
maker-Fvb2-1-augustus-gene-147.28	PREDICTED: protein LONGIFOLIA 1 [Fragaria vesca subsp. vesca]	-1.30849	7.27e-10	4.68714e-09	yes	down		augustus_masked-Fvb4-3-processed-gene-28.5	PREDICTED: uncharacterized protein LOC101294061 [Fragaria vesca subsp. vesca]	3.23716	4.99584e-37	1.09227e-35	yes	up
maker-Fvb1-2-augustus-gene-33.50	PREDICTED: probable chlorophyll(ide) b reductase NYC1, chloroplastic [Fragaria vesca subsp. vesca]	-1.22344	4.93e-93	3.08505e-91	yes	down		MSTRG.12114	PREDICTED: UPF0496 protein At4g34330 [Fragaria vesca subsp. vesca]	2.27247	2.15408e-23	2.97709e-22	yes	up
maker-Fvb7-4-augustus-gene-29.38	PREDICTED: cytochrome P450 704C1-like isoform X2 [Fragaria vesca subsp. vesca]	-2.44358	6.57e-11	4.59022e-10	yes	down		maker-Fvb5-1-augustus-gene-91.56	PREDICTED: uncharacterized endoplasmic reticulum membrane protein C16E8.02 [Fragaria vesca subsp. vesca]	1.23706	1.48874e-35	3.12011e-34	yes	up
maker-Fvb3-4-augustus-gene-247.50	PREDICTED: uncharacterized protein At3g17950-like [Fragaria vesca subsp. vesca]	-1.07565	0.00957489	0.0239726	yes	down		snap_masked-Fvb5-3-processed-gene-28.31	PREDICTED: protein EXORDIUM-like [Fragaria vesca subsp. vesca]	3.75331	5.46908e-53	1.74128e-51	yes	up
maker-Fvb6-3-augustus-gene-424.53	PREDICTED: putative F-box protein PP2-B12 isoform X2 [Fragaria vesca subsp. vesca]	-1.43229	0.0138713	0.0333053	yes	down		maker-Fvb2-2-augustus-gene-23.34	PREDICTED: uncharacterized protein LOC101305918 [Fragaria vesca subsp. vesca]	3.7137	1.2536e-101	8.81621e-100	yes	up
MSTRG.49532	uracil phosphoribosyltransferase isoform X2 [Rosa chinensis]	-1.61276	2.61e-09	1.60861e-08	yes	down		maker-Fvb1-4-augustus-gene-171.18	PREDICTED: glycogen synthase kinase-3 homolog MsK-3 isoform X1 [Fragaria vesca subsp. vesca]	1.66486	8.94606e-15	8.13761e-14	yes	up
maker-Fvb7-3-snap-gene-30.72	putative multi antimicrobial extrusion protein [Rosa chinensis]	-1.42885	3.12e-13	2.58036e-12	yes	down		maker-Fvb5-2-augustus-gene-27.53	PREDICTED: probable WRKY transcription factor 53 [Fragaria vesca subsp. vesca]	2.82345	1.07755e-53	3.49339e-52	yes	up
augustus_masked-Fvb6-1-processed-gene-50.14	PREDICTED: uncharacterized protein LOC101295836 [Fragaria vesca subsp. vesca]	-1.10991	0.00158413	0.00469097	yes	down		maker-Fvb5-4-augustus-gene-22.42	PREDICTED: uncharacterized protein LOC101303711 [Fragaria vesca subsp. vesca]	4.58	6.78068e-23	9.16855e-22	yes	up
MSTRG.13737	--	-2.36051	1.28e-50	3.88351e-49	yes	down		maker-Fvb5-3-augustus-gene-52.42	PREDICTED: phosphoenolpyruvate carboxykinase [ATP]-like [Fragaria vesca subsp. vesca]	2.27861	1.92728e-75	9.13047e-74	yes	up
maker-Fvb6-1-augustus-gene-22.41	PREDICTED: uncharacterized protein LOC101300550 [Fragaria vesca subsp. vesca]	-1.51041	3.73e-17	3.86794e-16	yes	down		augustus_masked-Fvb3-4-processed-gene-64.8	PREDICTED: sugar carrier protein C-like [Fragaria vesca subsp. vesca]	5.98043	1.28905e-06	6.02898e-06	yes	up
maker-Fvb4-4-augustus-gene-9.39	PREDICTED: protein XRI1 [Fragaria vesca subsp. vesca]	-1.12119	0.00423775	0.0115211	yes	down		augustus_masked-Fvb4-3-processed-gene-257.0	uncharacterized protein LOC112198972 [Rosa chinensis]	2.61393	0.000152244	0.00053701	yes	up
MSTRG.25728	--	-1.42477	5.42e-08	2.93615e-07	yes	down		MSTRG.2151	PREDICTED: putative pentatricopeptide repeat-containing protein At3g23330 [Fragaria vesca subsp. vesca]	2.91383	2.96689e-09	1.82261e-08	yes	up
snap_masked-Fvb5-2-processed-gene-152.10	PREDICTED: LOW QUALITY PROTEIN: pentatricopeptide repeat-containing protein At4g19440, chloroplastic [Fragaria vesca subsp. vesca]	-1.11403	2.06e-23	2.85163e-22	yes	down		MSTRG.59665	PREDICTED: ethylene-responsive transcription factor ERF105-like [Fragaria vesca subsp. vesca]	4.13989	0	0	yes	up
augustus_masked-Fvb3-3-processed-gene-88.15	PREDICTED: uncharacterized protein LOC105350456 [Fragaria vesca subsp. vesca]	-1.02136	1.01e-09	6.42864e-09	yes	down		maker-Fvb1-1-snap-gene-154.40	putative tetratricopeptide-like helical domain-containing protein [Rosa chinensis]	2.76202	1.01096e-05	4.21921e-05	yes	up
MSTRG.53803	PREDICTED: uncharacterized protein LOC101313816 [Fragaria vesca subsp. vesca]	-1.13055	2.02e-69	8.71023e-68	yes	down		snap_masked-Fvb7-4-processed-gene-222.13	PREDICTED: transcription factor bHLH130-like [Fragaria vesca subsp. vesca]	2.18131	3.75575e-05	0.000145087	yes	up
snap_masked-Fvb6-2-processed-gene-346.21	PREDICTED: glucose-6-phosphate 1-dehydrogenase, chloroplastic [Fragaria vesca subsp. vesca]	-1.41001	2.24e-69	9.63879e-68	yes	down		maker-Fvb6-1-augustus-gene-131.27	PREDICTED: inorganic pyrophosphatase 1-like [Fragaria vesca subsp. vesca]	1.37724	4.91219e-33	9.48318e-32	yes	up
maker-Fvb5-4-snap-gene-250.39	PREDICTED: transcription factor MYB12-like [Fragaria vesca subsp. vesca]	-5.19969	1.59e-195	3.11937e-193	yes	down		maker-Fvb2-2-snap-gene-2.54	PREDICTED: chromosome-associated kinesin KIF4A [Fragaria vesca subsp. vesca]	1.16854	3.3305e-46	9.21723e-45	yes	up
maker-Fvb6-4-augustus-gene-237.36	PREDICTED: uncharacterized protein LOC101309649 isoform X1 [Fragaria vesca subsp. vesca]	-1.0862	0.00019331	0.000671609	yes	down		maker-Fvb4-1-augustus-gene-193.38	PREDICTED: proteoglycan 4-like [Fragaria vesca subsp. vesca]	1.40476	5.71139e-72	2.55478e-70	yes	up
maker-Fvb2-2-snap-gene-160.41	PREDICTED: MATE efflux family protein 4, chloroplastic-like [Fragaria vesca subsp. vesca]	-1.73656	9.74e-148	1.15326e-145	yes	down		maker-Fvb7-4-augustus-gene-63.34	PREDICTED: telomere repeat-binding protein 4 [Fragaria vesca subsp. vesca]	1.00982	2.39545e-31	4.39502e-30	yes	up
augustus_masked-Fvb1-2-processed-gene-269.5	PREDICTED: protein FAR1-RELATED SEQUENCE 5-like [Fragaria vesca subsp. vesca]	-2.53946	2.49e-07	1.25638e-06	yes	down		MSTRG.11042	PREDICTED: heat stress transcription factor A-7a [Fragaria vesca subsp. vesca]	1.79164	6.62461e-105	4.84313e-103	yes	up
augustus_masked-Fvb2-2-processed-gene-211.5	PREDICTED: LIM domain-containing protein WLIM1-like isoform X2 [Fragaria vesca subsp. vesca]	-1.33484	1.12e-11	8.26781e-11	yes	down		maker-Fvb2-2-augustus-gene-64.50	PREDICTED: auxin-induced protein AUX28-like [Fragaria vesca subsp. vesca]	1.18552	2.84022e-101	1.98511e-99	yes	up
snap_masked-Fvb7-1-processed-gene-232.34	PREDICTED: probable pectate lyase 13 [Fragaria vesca subsp. vesca]	-1.47067	0.0021215	0.00613345	yes	down		snap_masked-Fvb1-1-processed-gene-12.19	PREDICTED: sucrose synthase 7 [Fragaria vesca subsp. vesca]	5.57875	0.000576129	0.0018517	yes	up
maker-Fvb7-4-augustus-gene-9.75	PREDICTED: uncharacterized protein LOC101305012 [Fragaria vesca subsp. vesca]	-1.74363	0.000270682	0.000917409	yes	down		augustus_masked-Fvb6-2-processed-gene-286.3	PREDICTED: uncharacterized protein LOC101305101 [Fragaria vesca subsp. vesca]	1.37926	1.73801e-12	1.36303e-11	yes	up
maker-Fvb6-1-snap-gene-316.79	L-ascorbate oxidase homolog [Rosa chinensis]	-1.28372	7.02e-05	0.0002608	yes	down		MSTRG.31926	PREDICTED: uncharacterized protein LOC101312677 [Fragaria vesca subsp. vesca]	1.68365	1.09157e-11	8.09391e-11	yes	up
MSTRG.10480	PREDICTED: calcineurin B-like protein 10 [Fragaria vesca subsp. vesca]	-2.90386	1.6e-09	1.00683e-08	yes	down		maker-Fvb6-1-snap-gene-271.56	PREDICTED: ATP-dependent zinc metalloprotease FTSH 10, mitochondrial-like [Fragaria vesca subsp. vesca]	1.29313	3.39982e-43	8.78628e-42	yes	up
maker-Fvb6-2-augustus-gene-184.44	PREDICTED: protein MODIFIER OF SNC1 11 [Fragaria vesca subsp. vesca]	-1.37889	9.4e-172	1.4435e-169	yes	down		MSTRG.49372	putative ubiquitin [Rosa chinensis]	1.25544	2.26536e-96	1.49671e-94	yes	up
maker-Fvb6-1-snap-gene-17.62	uncharacterized protein LOC112185244 isoform X1 [Rosa chinensis]	-1.54472	0.00209027	0.00604916	yes	down		maker-Fvb6-3-augustus-gene-21.43	PREDICTED: apoptosis-enhancing nuclease isoform X1 [Fragaria vesca subsp. vesca]	2.26521	1.91219e-09	1.19298e-08	yes	up
maker-Fvb1-4-snap-gene-101.61	PREDICTED: uncharacterized protein LOC101304719 [Fragaria vesca subsp. vesca]	-1.31892	1.76e-158	2.32953e-156	yes	down		maker-Fvb4-2-snap-gene-10.64	PREDICTED: metalloendoproteinase 1-like [Fragaria vesca subsp. vesca]	1.48144	7.89315e-08	4.21264e-07	yes	up
maker-Fvb7-3-augustus-gene-4.59	PREDICTED: transmembrane ascorbate ferrireductase 1 [Fragaria vesca subsp. vesca]	-1.1455	7.85e-34	1.5575e-32	yes	down		maker-Fvb2-4-augustus-gene-1.40	PREDICTED: probable BOI-related E3 ubiquitin-protein ligase 3 [Fragaria vesca subsp. vesca]	1.09966	0.010762	0.0265853	yes	up
maker-Fvb2-1-augustus-gene-225.39	PREDICTED: serine/threonine-protein kinase tricorner [Fragaria vesca subsp. vesca]	-1.22676	2.38e-93	1.50045e-91	yes	down		augustus_masked-Fvb6-2-processed-gene-215.6	PREDICTED: wound-induced protein 1 [Fragaria vesca subsp. vesca]	2.77692	1.75533e-28	2.94063e-27	yes	up
maker-Fvb4-3-snap-gene-127.61	PREDICTED: FIP1[V]-like protein isoform X1 [Fragaria vesca subsp. vesca]	-1.6754	3.45e-16	3.39986e-15	yes	down		maker-Fvb7-4-augustus-gene-69.42	PREDICTED: uncharacterized protein LOC101296040 [Fragaria vesca subsp. vesca]	1.03302	6.37206e-29	1.0825e-27	yes	up
maker-Fvb5-1-snap-gene-86.55	PREDICTED: presenilins-associated rhomboid-like protein, mitochondrial [Fragaria vesca subsp. vesca]	-1.30422	4.09e-31	7.46469e-30	yes	down		snap_masked-Fvb7-1-processed-gene-230.19	PREDICTED: NAC domain-containing protein 18-like [Fragaria vesca subsp. vesca]	1.89716	0.00909368	0.0228833	yes	up
maker-Fvb4-3-augustus-gene-20.38	PREDICTED: adagio protein 3 [Fragaria vesca subsp. vesca]	-4.03444	0	0	yes	down		maker-Fvb6-2-augustus-gene-46.33	PREDICTED: protein IWS1 homolog A [Fragaria vesca subsp. vesca]	1.25813	7.09822e-08	3.80362e-07	yes	up
maker-Fvb3-1-augustus-gene-314.58	PREDICTED: E3 ubiquitin-protein ligase COP1-like isoform X1 [Fragaria vesca subsp. vesca]	-3.5695	0	0	yes	down		MSTRG.18332	PREDICTED: zinc finger protein CONSTANS-LIKE 4 [Fragaria vesca subsp. vesca]	1.04125	1.31298e-07	6.84375e-07	yes	up
augustus_masked-Fvb7-3-processed-gene-115.5	PREDICTED: E3 ubiquitin-protein ligase At3g02290 [Fragaria vesca subsp. vesca]	-1.87853	2.65e-95	1.7314e-93	yes	down		maker-Fvb6-2-augustus-gene-229.38	PREDICTED: pyroglutamyl-peptidase 1-like protein [Fragaria vesca subsp. vesca]	1.09661	5.14897e-20	6.14006e-19	yes	up
MSTRG.56140	PREDICTED: uncharacterized protein LOC101291744 [Fragaria vesca subsp. vesca]	-1.03973	1.21e-13	1.03141e-12	yes	down		MSTRG.13523	PREDICTED: pEARLI1-like lipid transfer protein 1 [Fragaria vesca subsp. vesca]	1.29628	8.38539e-42	2.08269e-40	yes	up
maker-Fvb5-3-augustus-gene-36.29	PREDICTED: laccase-14-like [Fragaria vesca subsp. vesca]	-1.68512	7.32e-42	1.82204e-40	yes	down		augustus_masked-Fvb5-3-processed-gene-38.12	PREDICTED: putative DNA-binding protein ESCAROLA [Fragaria vesca subsp. vesca]	3.00598	2.59853e-08	1.4598e-07	yes	up
maker-Fvb2-4-snap-gene-14.57	PREDICTED: uncharacterized protein LOC101309594 [Fragaria vesca subsp. vesca]	-1.14891	1.35e-69	5.8146e-68	yes	down		augustus_masked-Fvb4-3-processed-gene-253.9	PREDICTED: protein GLUTAMINE DUMPER 3 [Fragaria vesca subsp. vesca]	1.0895	4.38649e-05	0.000167898	yes	up
maker-Fvb3-4-snap-gene-150.47	PREDICTED: nucleolin-like [Fragaria vesca subsp. vesca]	-1.07543	8.28e-08	4.40886e-07	yes	down		augustus_masked-Fvb2-1-processed-gene-249.7	PREDICTED: uncharacterized protein LOC101304061 [Fragaria vesca subsp. vesca]	1.35048	0.0111842	0.0275173	yes	up
maker-Fvb6-1-augustus-gene-261.38	PREDICTED: pentatricopeptide repeat-containing protein At5g02830, chloroplastic isoform X2 [Fragaria vesca subsp. vesca]	-1.05845	5.66e-71	2.49154e-69	yes	down		MSTRG.26498	PREDICTED: protein SMG7L [Fragaria vesca subsp. vesca]	1.08789	5.97281e-09	3.57087e-08	yes	up
maker-Fvb5-2-augustus-gene-22.44	PREDICTED: endoglucanase 6 [Fragaria vesca subsp. vesca]	-1.32828	2.99e-29	5.14801e-28	yes	down		augustus_masked-Fvb3-3-processed-gene-48.2	PREDICTED: protein argonaute 2 [Fragaria vesca subsp. vesca]	2.20148	7.76466e-07	3.72073e-06	yes	up
maker-Fvb6-4-augustus-gene-27.53	PREDICTED: probable glycosyltransferase At5g20260 isoform X3 [Fragaria vesca subsp. vesca]	-1.1742	1.74e-75	8.24359e-74	yes	down		augustus_masked-Fvb4-2-processed-gene-233.4	PREDICTED: ethylene-responsive transcription factor ERF098 [Fragaria vesca subsp. vesca]	3.46522	1.49105e-05	6.07836e-05	yes	up
augustus_masked-Fvb1-3-processed-gene-0.8	PREDICTED: protein phosphatase 2C 16 [Fragaria vesca subsp. vesca]	-1.34777	0.0022876	0.00657276	yes	down		snap_masked-Fvb6-1-processed-gene-54.45	uncharacterized protein LOC18784430 [Prunus persica]	4.30769	8.63936e-11	5.98472e-10	yes	up
maker-Fvb6-2-augustus-gene-291.46	PREDICTED: homeobox-leucine zipper protein HAT5 [Fragaria vesca subsp. vesca]	-1.16393	2.77e-17	2.90223e-16	yes	down		maker-Fvb7-1-snap-gene-227.58	PREDICTED: L-gulonolactone oxidase-like isoform X1 [Fragaria vesca subsp. vesca]	1.7365	7.31265e-08	3.91505e-07	yes	up
maker-Fvb5-4-snap-gene-91.42	PREDICTED: UPF0676 protein C1494.01-like [Fragaria vesca subsp. vesca]	-1.24288	2.53e-51	7.82826e-50	yes	down		maker-Fvb6-3-augustus-gene-148.25	PREDICTED: uncharacterized protein LOC101301699 [Fragaria vesca subsp. vesca]	1.33518	6.6129e-23	8.94702e-22	yes	up
maker-Fvb1-1-snap-gene-223.98	PREDICTED: protein S-acyltransferase 10-like [Fragaria vesca subsp. vesca]	-1.32134	4.64e-31	8.45375e-30	yes	down		augustus_masked-Fvb3-4-processed-gene-240.8	PREDICTED: cationic amino acid transporter 1-like [Fragaria vesca subsp. vesca]	1.28149	3.50767e-46	9.70459e-45	yes	up
maker-Fvb4-4-augustus-gene-30.45	PREDICTED: uncharacterized protein LOC101307692 [Fragaria vesca subsp. vesca]	-1.60605	4.21e-12	3.2109e-11	yes	down		maker-Fvb6-4-augustus-gene-225.29	PREDICTED: uncharacterized protein LOC101301699 [Fragaria vesca subsp. vesca]	1.38385	8.42635e-26	1.27808e-24	yes	up
maker-Fvb7-2-augustus-gene-236.63	PREDICTED: rop guanine nucleotide exchange factor 5 [Fragaria vesca subsp. vesca]	-1.24645	0.000401025	0.00132371	yes	down		maker-Fvb5-4-snap-gene-198.36	putative powdery mildew resistance protein, RPW8 [Rosa chinensis]	5.79591	4.62406e-73	2.11221e-71	yes	up
MSTRG.38660	PREDICTED: transcription factor BIM1 [Fragaria vesca subsp. vesca]	-1.03077	2.54e-10	1.70165e-09	yes	down		maker-Fvb2-1-augustus-gene-88.46	RecName: Full=Alcohol dehydrogenase	1.30148	0.00661816	0.0171835	yes	up
maker-Fvb1-2-snap-gene-159.48	PREDICTED: 4-alpha-glucanotransferase, chloroplastic/amyloplastic [Fragaria vesca subsp. vesca]	-1.54617	3.77e-168	5.62626e-166	yes	down		augustus_masked-Fvb4-3-processed-gene-134.13	PREDICTED: RING-H2 finger protein ATL2 [Fragaria vesca subsp. vesca]	3.03305	3.96798e-72	1.78463e-70	yes	up
augustus_masked-Fvb2-4-processed-gene-217.21	PREDICTED: translocator protein homolog [Fragaria vesca subsp. vesca]	-2.40672	2.94e-17	3.06681e-16	yes	down		MSTRG.57413	PREDICTED: zinc finger protein CONSTANS-LIKE 9-like [Fragaria vesca subsp. vesca]	2.70663	5.08609e-95	3.30727e-93	yes	up
maker-Fvb3-1-augustus-gene-54.21	PREDICTED: methylsterol monooxygenase 2-2 isoform X1 [Fragaria vesca subsp. vesca]	-2.28559	1.13e-143	1.29045e-141	yes	down		maker-Fvb2-1-augustus-gene-33.33	PREDICTED: CDPK-related kinase 5-like [Fragaria vesca subsp. vesca]	1.15214	6.54162e-27	1.03592e-25	yes	up
maker-Fvb1-1-augustus-gene-202.53	PREDICTED: protein root UVB sensitive 4 [Fragaria vesca subsp. vesca]	-1.06001	3.17e-13	2.62255e-12	yes	down		MSTRG.35494	PREDICTED: F-box protein At1g67340 [Fragaria vesca subsp. vesca]	1.91021	3.36078e-33	6.51729e-32	yes	up
maker-Fvb2-2-augustus-gene-170.33	G-box-binding factor 1-like [Rosa chinensis]	-1.59889	4.52e-19	5.15718e-18	yes	down		maker-Fvb6-3-snap-gene-163.40	PREDICTED: organic cation/carnitine transporter 4 [Fragaria vesca subsp. vesca]	1.54399	0.0125903	0.0305702	yes	up
MSTRG.42427	PREDICTED: alternative NAD(P)H-ubiquinone oxidoreductase C1, chloroplastic/mitochondrial [Fragaria vesca subsp. vesca]	-2.7956	2.38e-15	2.24471e-14	yes	down		augustus_masked-Fvb2-1-processed-gene-229.0	PREDICTED: transcription factor MYB44-like [Fragaria vesca subsp. vesca]	2.44758	6.26141e-08	3.37297e-07	yes	up
MSTRG.6429	PREDICTED: uncharacterized protein LOC101291956 [Fragaria vesca subsp. vesca]	-1.79052	6.87e-15	6.29342e-14	yes	down		maker-Fvb6-4-augustus-gene-297.46	PREDICTED: subtilisin-like protease SBT5.3 [Fragaria vesca subsp. vesca]	1.05934	3.79758e-31	6.93665e-30	yes	up
MSTRG.20498	PREDICTED: ubiquitin carboxyl-terminal hydrolase 15 isoform X1 [Fragaria vesca subsp. vesca]	-1.48716	8.81e-136	9.19829e-134	yes	down		maker-Fvb6-1-augustus-gene-155.24	PREDICTED: 26.5 kDa heat shock protein, mitochondrial-like [Fragaria vesca subsp. vesca]	1.8228	1.87978e-05	7.57472e-05	yes	up
maker-Fvb7-1-snap-gene-48.47	PREDICTED: splicing factor 3A subunit 3-like [Fragaria vesca subsp. vesca]	-1.1525	5.88e-22	7.63979e-21	yes	down		maker-Fvb3-1-augustus-gene-180.22	PREDICTED: glutamate receptor 2.7-like [Fragaria vesca subsp. vesca]	1.60152	9.2577e-05	0.000337725	yes	up
maker-Fvb6-1-snap-gene-274.68	PREDICTED: delta-1-pyrroline-5-carboxylate synthase-like [Fragaria vesca subsp. vesca]	-1.326	0.00200117	0.00581358	yes	down		maker-Fvb3-1-augustus-gene-184.38	PREDICTED: protein disulfide-isomerase 5-3 [Fragaria vesca subsp. vesca]	1.07385	0.00024535	0.000837316	yes	up
maker-Fvb4-1-augustus-gene-155.24	leucoanthocyanidin reductase [Fragaria x ananassa]	-1.29236	2.53e-34	5.09314e-33	yes	down		augustus_masked-Fvb2-3-processed-gene-2.2	PREDICTED: uncharacterized protein LOC101312951 [Fragaria vesca subsp. vesca]	2.13646	2.30089e-10	1.5436e-09	yes	up
maker-Fvb7-2-augustus-gene-303.52	UMP-CMP kinase [Rosa chinensis]	-1.39449	1.75e-09	1.09532e-08	yes	down		maker-Fvb6-4-augustus-gene-81.35	PREDICTED: chlorophyll a-b binding protein CP29.2, chloroplastic [Fragaria vesca subsp. vesca]	1.40192	3.21301e-114	2.6196e-112	yes	up
maker-Fvb1-2-augustus-gene-189.25	PREDICTED: uncharacterized protein LOC101309584 [Fragaria vesca subsp. vesca]	-1.27891	1.98e-20	2.41034e-19	yes	down		maker-Fvb2-1-snap-gene-142.34	PREDICTED: hyoscyamine 6-dioxygenase-like isoform X3 [Fragaria vesca subsp. vesca]	1.08507	2.10124e-07	1.07193e-06	yes	up
maker-Fvb5-4-augustus-gene-54.23	PREDICTED: uncharacterized protein LOC101303763 [Fragaria vesca subsp. vesca]	-1.85481	1.89e-05	7.61148e-05	yes	down		maker-Fvb5-4-augustus-gene-24.56	PREDICTED: probable GABA transporter 2 [Fragaria vesca subsp. vesca]	3.22551	1.03878e-35	2.18771e-34	yes	up
maker-Fvb4-3-augustus-gene-246.20	PREDICTED: two-component response regulator-like APRR1 [Fragaria vesca subsp. vesca]	-1.13296	3.78e-16	3.71268e-15	yes	down		MSTRG.1235	PREDICTED: UPF0548 protein At2g17695 [Fragaria vesca subsp. vesca]	1.06425	4.89391e-16	4.77483e-15	yes	up
maker-Fvb6-2-augustus-gene-212.30	hypothetical protein RchiOBHm_Chr3g0461831 [Rosa chinensis]	-2.71858	1.29e-06	6.02041e-06	yes	down		MSTRG.16940	PREDICTED: BTB/POZ domain-containing protein At2g30600 [Fragaria vesca subsp. vesca]	1.71242	0	0	yes	up
MSTRG.7307	PREDICTED: LOW QUALITY PROTEIN: extensin-like [Pyrus x bretschneideri]	-2.53542	0	0	yes	down		maker-Fvb7-2-augustus-gene-290.34	PREDICTED: ribulose bisphosphate carboxylase/oxygenase activase, chloroplastic isoform X1 [Fragaria vesca subsp. vesca]	1.81404	0	0	yes	up
maker-Fvb3-2-augustus-gene-58.57	PREDICTED: uncharacterized oxidoreductase C663.09c [Fragaria vesca subsp. vesca]	-1.89411	3.44e-69	1.48096e-67	yes	down		maker-Fvb3-2-snap-gene-71.47	PREDICTED: uncharacterized protein LOC101300513 [Fragaria vesca subsp. vesca]	1.49671	1.26587e-13	1.07394e-12	yes	up
maker-Fvb5-4-augustus-gene-13.48	PREDICTED: uncharacterized protein LOC101311382 [Fragaria vesca subsp. vesca]	-1.26329	1.49e-34	3.01879e-33	yes	down		maker-Fvb2-4-snap-gene-53.43	uncharacterized protein LOC112172658 isoform X1 [Rosa chinensis]	2.74346	2.46524e-59	8.93216e-58	yes	up
MSTRG.43179	PREDICTED: probable arabinosyltransferase ARAD2 [Fragaria vesca subsp. vesca]	-2.21951	1.43e-38	3.26957e-37	yes	down		maker-Fvb3-2-augustus-gene-38.64	PREDICTED: heat stress transcription factor A-4c-like [Fragaria vesca subsp. vesca]	1.05947	2.52529e-06	1.13916e-05	yes	up
maker-Fvb4-2-augustus-gene-237.14	ethylene receptor [Fragaria x ananassa]	-2.09029	5.46e-132	5.41918e-130	yes	down		maker-Fvb5-1-snap-gene-162.41	PREDICTED: probable polyamine transporter At1g31830 [Fragaria vesca subsp. vesca]	1.17856	0.0148465	0.0353954	yes	up
maker-Fvb5-2-augustus-gene-126.18	PREDICTED: uncharacterized protein LOC101292507 [Fragaria vesca subsp. vesca]	-1.25644	0.0156739	0.0371304	yes	down		MSTRG.15679	PREDICTED: monocopper oxidase-like protein SKU5 [Fragaria vesca subsp. vesca]	1.57875	6.90287e-06	2.9505e-05	yes	up
maker-Fvb2-2-augustus-gene-18.52	PREDICTED: pentatricopeptide repeat-containing protein At5g24830 [Fragaria vesca subsp. vesca]	-1.61471	2.37e-108	1.79184e-106	yes	down		augustus_masked-Fvb5-1-processed-gene-262.3	PREDICTED: UDP-glycosyltransferase 91C1 [Fragaria vesca subsp. vesca]	3.39071	7.0402e-69	3.00948e-67	yes	up
augustus_masked-Fvb2-4-processed-gene-17.5	LIM domain-containing protein WLIM1-like isoform X1 [Rosa chinensis]	-1.46816	7.92e-08	4.22436e-07	yes	down		snap_masked-Fvb7-4-processed-gene-49.32	PREDICTED: nematode resistance protein-like HSPRO2 [Fragaria vesca subsp. vesca]	2.104	1.13156e-20	1.39055e-19	yes	up
maker-Fvb6-3-augustus-gene-3.37	PREDICTED: glycerophosphodiester phosphodiesterase GDPD1, chloroplastic-like [Fragaria vesca subsp. vesca]	-2.24452	9.41e-28	1.53587e-26	yes	down		augustus_masked-Fvb4-3-processed-gene-128.14	PREDICTED: glucan endo-1,3-beta-glucosidase, basic isoform [Fragaria vesca subsp. vesca]	2.09148	0.00076621	0.00240752	yes	up
maker-Fvb3-4-augustus-gene-258.41	PREDICTED: alpha,alpha-trehalose-phosphate synthase [UDP-forming] 1-like [Fragaria vesca subsp. vesca]	-1.39089	1.52e-23	2.10447e-22	yes	down		augustus_masked-Fvb4-2-processed-gene-47.9	PREDICTED: uncharacterized protein LOC105351825 [Fragaria vesca subsp. vesca]	3.41747	7.41996e-18	7.96808e-17	yes	up
maker-Fvb7-3-augustus-gene-45.62	PREDICTED: uncharacterized protein LOC101300762 [Fragaria vesca subsp. vesca]	-1.43069	1.07e-70	4.69248e-69	yes	down		maker-Fvb2-3-augustus-gene-184.37	PREDICTED: CDPK-related kinase 5-like [Fragaria vesca subsp. vesca]	1.14561	2.2965e-18	2.53404e-17	yes	up
maker-Fvb3-4-augustus-gene-111.31	PREDICTED: major latex protein 146-like [Fragaria vesca subsp. vesca]	-1.23256	2.5e-101	1.75207e-99	yes	down		maker-Fvb5-1-augustus-gene-3.66	PREDICTED: 7-ethoxycoumarin O-deethylase-like [Fragaria vesca subsp. vesca]	2.55892	0.000369369	0.00122596	yes	up
maker-Fvb3-1-augustus-gene-218.51	PREDICTED: B-box zinc finger protein 22 [Fragaria vesca subsp. vesca]	-2.10516	1.98e-148	2.3689e-146	yes	down		augustus_masked-Fvb5-4-processed-gene-2.0	PREDICTED: acid beta-fructofuranosidase-like [Fragaria vesca subsp. vesca]	4.03564	3.90917e-28	6.46515e-27	yes	up
maker-Fvb1-3-augustus-gene-44.33	putative peroxiredoxin [Rosa chinensis]	-1.81965	1.73e-206	3.63498e-204	yes	down		snap_masked-Fvb3-4-processed-gene-157.26	PREDICTED: cytochrome P450 71D11-like [Fragaria vesca subsp. vesca]	2.67226	0.00546231	0.0144521	yes	up
maker-Fvb4-3-augustus-gene-42.58	PREDICTED: uncharacterized protein At1g04910-like [Fragaria vesca subsp. vesca]	-1.03251	8.84e-30	1.54917e-28	yes	down		maker-Fvb4-3-snap-gene-38.57	PREDICTED: LRR receptor-like serine/threonine-protein kinase RPK2 [Fragaria vesca subsp. vesca]	1.55022	6.79998e-13	5.49366e-12	yes	up
MSTRG.49541	PREDICTED: protein NRT1/ PTR FAMILY 2.8 [Fragaria vesca subsp. vesca]	-1.14431	1.82e-17	1.91476e-16	yes	down		maker-Fvb1-2-augustus-gene-0.32	PREDICTED: pectinesterase/pectinesterase inhibitor PPE8B-like [Fragaria vesca subsp. vesca]	1.40346	3.02648e-46	8.38868e-45	yes	up
maker-Fvb5-4-augustus-gene-238.42	PREDICTED: sulfate transporter 1.3 [Fragaria vesca subsp. vesca]	-1.1131	2.15e-63	8.42578e-62	yes	down		maker-Fvb2-2-snap-gene-234.41	PREDICTED: nuclear poly(A) polymerase 1-like [Fragaria vesca subsp. vesca]	1.54349	8.31902e-11	5.7712e-10	yes	up
maker-Fvb7-2-augustus-gene-285.43	PREDICTED: zinc finger protein CONSTANS-LIKE 1 [Fragaria vesca subsp. vesca]	-1.01282	1.99e-07	1.01746e-06	yes	down		maker-Fvb3-4-augustus-gene-142.31	PREDICTED: serine/threonine-protein kinase Nek5 [Fragaria vesca subsp. vesca]	1.01956	3.08298e-13	2.55265e-12	yes	up
maker-Fvb6-1-augustus-gene-310.51	PREDICTED: protein LURP-one-related 8 [Fragaria vesca subsp. vesca]	-1.10449	6.77e-43	1.73561e-41	yes	down		augustus_masked-Fvb2-3-processed-gene-17.10	PREDICTED: ethylene-responsive transcription factor ERF014 [Fragaria vesca subsp. vesca]	3.97169	5.64916e-09	3.3852e-08	yes	up
maker-Fvb7-1-augustus-gene-124.25	uncharacterized protein LOC112193391 [Rosa chinensis]	-1.20735	4.68e-09	2.82232e-08	yes	down		maker-Fvb4-1-snap-gene-124.42	PREDICTED: uncharacterized protein LOC101313502 [Fragaria vesca subsp. vesca]	1.11079	7.63463e-05	0.000282059	yes	up
MSTRG.43963	PREDICTED: probable serine/threonine-protein kinase At1g09600 isoform X1 [Fragaria vesca subsp. vesca]	-1.11893	1.42e-22	1.89578e-21	yes	down		maker-Fvb2-1-augustus-gene-219.49	PREDICTED: uncharacterized protein LOC101307170 [Fragaria vesca subsp. vesca]	1.19537	1.23013e-12	9.76394e-12	yes	up
MSTRG.31384	hypothetical protein PRUPE_7G228100 [Prunus persica]	-1.16141	6.43e-81	3.31496e-79	yes	down		maker-Fvb4-4-augustus-gene-10.55	PREDICTED: 7-deoxyloganetin glucosyltransferase-like [Fragaria vesca subsp. vesca]	2.40565	5.81267e-44	1.53146e-42	yes	up
snap_masked-Fvb1-4-processed-gene-23.28	PREDICTED: ATPase 8, plasma membrane-type-like isoform X2 [Fragaria vesca subsp. vesca]	-1.0172	3.37e-19	3.87386e-18	yes	down		maker-Fvb6-1-augustus-gene-29.51	PREDICTED: protein CREG1 [Fragaria vesca subsp. vesca]	2.61269	1.22315e-45	3.33918e-44	yes	up
maker-Fvb5-3-augustus-gene-203.60	PREDICTED: S-adenosylmethionine carrier 1, chloroplastic/mitochondrial [Fragaria vesca subsp. vesca]	-1.23292	0.00051305	0.00166294	yes	down		maker-Fvb3-4-augustus-gene-111.32	PREDICTED: MLP-like protein 43 [Fragaria vesca subsp. vesca]	2.34213	2.82785e-186	5.06224e-184	yes	up
maker-Fvb3-3-snap-gene-120.49	PREDICTED: tobamovirus multiplication protein 2B [Fragaria vesca subsp. vesca]	-2.34816	1.44e-67	6.00286e-66	yes	down		MSTRG.62347	wall-associated receptor kinase-like 20 [Rosa chinensis]	1.37835	2.07142e-11	1.50587e-10	yes	up
MSTRG.38749	PREDICTED: NAC domain-containing protein 100 [Fragaria vesca subsp. vesca]	-4.21397	1.27e-64	5.01945e-63	yes	down		MSTRG.33499	PREDICTED: probable inactive purple acid phosphatase 1 isoform X1 [Fragaria vesca subsp. vesca]	1.06857	7.46065e-20	8.81316e-19	yes	up
maker-Fvb4-2-augustus-gene-45.43	PREDICTED: probable transcription factor GLK2 [Fragaria vesca subsp. vesca]	-1.70078	4.74e-20	5.66318e-19	yes	down		augustus_masked-Fvb3-4-processed-gene-49.8	PREDICTED: probable pyridoxal 5&apos;-phosphate synthase subunit PDX1 [Fragaria vesca subsp. vesca]	1.27066	0.00570045	0.0150067	yes	up
maker-Fvb6-1-snap-gene-275.58	PREDICTED: protein NRT1/ PTR FAMILY 2.8 [Fragaria vesca subsp. vesca]	-1.18511	3.25e-19	3.73846e-18	yes	down		maker-Fvb1-2-augustus-gene-29.52	bifunctional epoxide hydrolase 2-like [Rosa chinensis]	1.10532	0.00139628	0.00417855	yes	up
maker-Fvb2-4-snap-gene-189.64	PREDICTED: UDP-glucuronic acid decarboxylase 2 [Fragaria vesca subsp. vesca]	-1.03296	8.27e-16	7.97713e-15	yes	down		augustus_masked-Fvb6-2-processed-gene-176.10	PREDICTED: uncharacterized protein LOC101312271 [Fragaria vesca subsp. vesca]	3.1966	0.000129218	0.000461034	yes	up
maker-Fvb1-4-augustus-gene-63.65	PREDICTED: pheophytinase, chloroplastic [Fragaria vesca subsp. vesca]	-1.2041	3.87e-100	2.66679e-98	yes	down		snap_masked-Fvb6-3-processed-gene-38.34	PREDICTED: phenolic glucoside malonyltransferase 1-like [Fragaria vesca subsp. vesca]	2.98691	1.38287e-13	1.17089e-12	yes	up
MSTRG.44839	uncharacterized protein LOC18784409 [Prunus persica]	-1.78943	3.58e-133	3.61465e-131	yes	down		augustus_masked-Fvb5-1-processed-gene-126.7	PREDICTED: bax inhibitor 1-like [Fragaria vesca subsp. vesca]	1.11728	4.62003e-72	2.07172e-70	yes	up
maker-Fvb6-1-snap-gene-10.70	PREDICTED: truncated transcription factor CAULIFLOWER A-like [Fragaria vesca subsp. vesca]	-1.98399	1.17e-05	4.85637e-05	yes	down		augustus_masked-Fvb2-3-processed-gene-35.4	PREDICTED: DNA topoisomerase 1-like [Fragaria vesca subsp. vesca]	1.55896	7.5553e-23	1.01931e-21	yes	up
augustus_masked-Fvb3-4-processed-gene-52.0	sodium-dependent phosphate transport protein 1, chloroplastic [Rosa chinensis]	-1.0488	1.56e-75	7.40306e-74	yes	down		augustus_masked-Fvb5-1-processed-gene-297.9	uncharacterized protein LOC112185884 [Rosa chinensis]	1.41236	3.47121e-53	1.11222e-51	yes	up
maker-Fvb3-1-augustus-gene-50.31	PREDICTED: alpha-glucan phosphorylase, H isozyme [Fragaria vesca subsp. vesca]	-1.14306	9.05e-117	7.54135e-115	yes	down		maker-Fvb7-1-augustus-gene-264.55	PREDICTED: protein EARLY RESPONSIVE TO DEHYDRATION 15-like isoform X2 [Fragaria vesca subsp. vesca]	1.26209	3.68962e-10	2.43646e-09	yes	up
augustus_masked-Fvb2-1-processed-gene-94.5	PREDICTED: uncharacterized protein LOC101295772 isoform X1 [Fragaria vesca subsp. vesca]	-1.96782	2.58e-131	2.52291e-129	yes	down		MSTRG.3896	PREDICTED: cysteine-rich repeat secretory protein 60 [Fragaria vesca subsp. vesca]	1.42307	6.41619e-05	0.000239526	yes	up
maker-Fvb3-2-augustus-gene-27.64	PREDICTED: E3 ubiquitin-protein ligase COP1-like isoform X1 [Fragaria vesca subsp. vesca]	-2.3776	0	0	yes	down		maker-Fvb1-1-augustus-gene-189.33	PREDICTED: NEDD8-conjugating enzyme Ubc12 [Fragaria vesca subsp. vesca]	1.13753	1.57127e-13	1.32681e-12	yes	up
snap_masked-Fvb6-1-processed-gene-25.27	PREDICTED: WAT1-related protein At3g28050-like [Fragaria vesca subsp. vesca]	-1.90873	1.43e-08	8.2255e-08	yes	down		augustus_masked-Fvb7-4-processed-gene-212.0	hypothetical protein RchiOBHm_Chr1g0317121 [Rosa chinensis]	2.76251	2.64395e-11	1.90572e-10	yes	up
maker-Fvb4-4-augustus-gene-16.54	PREDICTED: transcription factor bHLH90 [Fragaria vesca subsp. vesca]	-3.07484	4.99e-37	1.09161e-35	yes	down		augustus_masked-Fvb7-2-processed-gene-232.5	PREDICTED: wall-associated receptor kinase-like 20 [Fragaria vesca subsp. vesca]	1.5969	4.20902e-22	5.50075e-21	yes	up
augustus_masked-Fvb7-1-processed-gene-241.11	PREDICTED: uncharacterized protein LOC101301053 [Fragaria vesca subsp. vesca]	-1.23341	1.46e-09	9.19782e-09	yes	down		maker-Fvb5-4-augustus-gene-221.18	PREDICTED: uncharacterized protein LOC101311865 [Fragaria vesca subsp. vesca]	1.10724	1.2196e-08	7.08067e-08	yes	up
maker-Fvb7-4-augustus-gene-95.37	transcriptional activator Myb [Fragaria vesca]	-2.6169	3.88e-09	2.35909e-08	yes	down		augustus_masked-Fvb1-3-processed-gene-157.3	PREDICTED: G-type lectin S-receptor-like serine/threonine-protein kinase RLK1 [Fragaria vesca subsp. vesca]	1.5791	6.19068e-59	2.227e-57	yes	up
snap_masked-Fvb1-4-processed-gene-101.33	PREDICTED: glucose-6-phosphate 1-dehydrogenase, chloroplastic [Fragaria vesca subsp. vesca]	-1.03622	2.1e-23	2.91023e-22	yes	down		maker-Fvb6-1-augustus-gene-83.46	putative ribonuclease H-like domain-containing protein [Rosa chinensis]	1.07771	1.6284e-08	9.33319e-08	yes	up
MSTRG.51271	PREDICTED: WAT1-related protein At5g40240-like [Fragaria vesca subsp. vesca]	-1.08854	3.31e-49	9.77991e-48	yes	down		maker-Fvb6-1-snap-gene-41.90	tyrosine--tRNA ligase 1, cytoplasmic-like [Rosa chinensis]	1.2572	1.25976e-14	1.13408e-13	yes	up
maker-Fvb1-1-augustus-gene-243.67	uncharacterized protein LOC112188152 [Rosa chinensis]	-1.85421	2.81e-141	3.11499e-139	yes	down		augustus_masked-Fvb1-4-processed-gene-85.3	PREDICTED: UPF0481 protein At3g47200 [Fragaria vesca subsp. vesca]	1.65673	1.83495e-06	8.42216e-06	yes	up
maker-Fvb2-4-augustus-gene-234.47	PREDICTED: uncharacterized protein LOC101303665 [Fragaria vesca subsp. vesca]	-4.53545	3.53e-50	1.06247e-48	yes	down		maker-Fvb2-3-augustus-gene-113.40	PREDICTED: probable LRR receptor-like serine/threonine-protein kinase At4g08850 [Fragaria vesca subsp. vesca]	1.15436	2.1206e-37	4.69418e-36	yes	up
maker-Fvb5-1-snap-gene-209.65	PREDICTED: protein SMG7-like [Fragaria vesca subsp. vesca]	-1.16236	2.4e-61	9.01883e-60	yes	down		maker-Fvb5-2-augustus-gene-238.29	PREDICTED: 1-aminocyclopropane-1-carboxylate oxidase homolog [Fragaria vesca subsp. vesca]	1.13106	0.000347797	0.00115878	yes	up
augustus_masked-Fvb6-2-processed-gene-6.6	PREDICTED: B-box zinc finger protein 32 [Fragaria vesca subsp. vesca]	-2.47382	3.55e-09	2.16546e-08	yes	down		augustus_masked-Fvb7-2-processed-gene-298.25	PREDICTED: probable membrane-associated kinase regulator 4 [Fragaria vesca subsp. vesca]	1.18133	0.000292634	0.000986273	yes	up
augustus_masked-Fvb5-4-processed-gene-222.2	PREDICTED: phosphoribosylaminoimidazole-succinocarboxamide synthase, chloroplastic isoform X1 [Fragaria vesca subsp. vesca]	-1.0153	4.92e-10	3.21585e-09	yes	down		maker-Fvb6-2-augustus-gene-305.51	aquaporin NIP2-1-like [Rosa chinensis]	1.65202	9.65792e-05	0.000351307	yes	up
augustus_masked-Fvb6-3-processed-gene-362.17	PREDICTED: mannan endo-1,4-beta-mannosidase 6 isoform X1 [Fragaria vesca subsp. vesca]	-2.16016	0.0144704	0.0345925	yes	down		snap_masked-Fvb6-3-processed-gene-253.26	PREDICTED: syntaxin-121-like [Fragaria vesca subsp. vesca]	1.86905	0.00906088	0.0228112	yes	up
maker-Fvb3-2-augustus-gene-264.42	mitochondrial uncoupling protein 2 isoform X2 [Prunus persica]	-1.05601	9.24e-15	8.39047e-14	yes	down		maker-Fvb1-3-snap-gene-67.57	PREDICTED: LRR receptor-like serine/threonine-protein kinase GSO1 [Fragaria vesca subsp. vesca]	1.63192	1.42477e-05	5.82518e-05	yes	up
maker-Fvb5-3-augustus-gene-193.50	PREDICTED: transmembrane protein DDB_G0273707/DDB_G0273361 [Fragaria vesca subsp. vesca]	-1.57556	5.48e-181	9.22681e-179	yes	down		maker-Fvb4-2-augustus-gene-27.50	PREDICTED: transcription factor PRE6 [Fragaria vesca subsp. vesca]	1.69384	3.0165e-41	7.39679e-40	yes	up
MSTRG.41487	PREDICTED: two-component response regulator-like APRR1 [Fragaria vesca subsp. vesca]	-1.99725	7.15e-39	1.64937e-37	yes	down		maker-Fvb7-1-augustus-gene-251.28	PREDICTED: uncharacterized protein LOC101311801 [Fragaria vesca subsp. vesca]	1.28289	1.08057e-17	1.15139e-16	yes	up
maker-Fvb3-2-snap-gene-265.44	PREDICTED: ATP-dependent zinc metalloprotease FTSH 9, chloroplastic [Fragaria vesca subsp. vesca]	-1.26229	5.49e-172	8.50362e-170	yes	down		maker-Fvb6-3-augustus-gene-369.39	PREDICTED: uncharacterized protein YFR016C-like [Fragaria vesca subsp. vesca]	1.2219	2.29493e-70	1.00375e-68	yes	up
augustus_masked-Fvb6-3-processed-gene-18.9	PREDICTED: cysteine-rich receptor-like protein kinase 42 [Fragaria vesca subsp. vesca]	-3.60699	2.21e-06	1.00569e-05	yes	down		maker-Fvb2-2-snap-gene-216.69	PREDICTED: dentin sialophosphoprotein [Fragaria vesca subsp. vesca]	1.14638	7.61486e-38	1.70606e-36	yes	up
maker-Fvb7-2-augustus-gene-99.51	PREDICTED: uncharacterized protein LOC101299228 [Fragaria vesca subsp. vesca]	-1.03316	4.06e-06	1.78709e-05	yes	down		maker-Fvb6-1-augustus-gene-233.38	PREDICTED: uncharacterized protein LOC101300265 [Fragaria vesca subsp. vesca]	2.64128	1.8347e-24	2.64254e-23	yes	up
maker-Fvb6-2-augustus-gene-230.63	PREDICTED: galactinol synthase 2-like [Fragaria vesca subsp. vesca]	-3.76202	6.51e-159	8.66754e-157	yes	down		augustus_masked-Fvb2-3-processed-gene-16.10	PREDICTED: glycine-rich protein 2-like [Fragaria vesca subsp. vesca]	1.85943	2.00109e-06	9.13015e-06	yes	up
MSTRG.61342	PREDICTED: proline-rich receptor-like protein kinase PERK9 [Pyrus x bretschneideri]	-1.76983	9.43e-06	3.95371e-05	yes	down		MSTRG.37322	PREDICTED: nucleosome assembly protein 1;1-like, partial [Fragaria vesca subsp. vesca]	1.03856	0.0027339	0.00773076	yes	up
maker-Fvb2-4-augustus-gene-167.30	PREDICTED: GABA transporter 1-like isoform X1 [Fragaria vesca subsp. vesca]	-1.9114	0.00511972	0.0136421	yes	down		augustus_masked-Fvb7-2-processed-gene-316.13	PREDICTED: uncharacterized protein LOC101303468 [Fragaria vesca subsp. vesca]	3.07092	3.61462e-233	9.80288e-231	yes	up
maker-Fvb1-4-snap-gene-21.70	putative glycerol-3-phosphate transporter 5 [Rosa chinensis]	-1.99793	1.31e-235	3.61337e-233	yes	down		maker-Fvb7-3-snap-gene-10.69	PREDICTED: uncharacterized protein LOC101292941 [Fragaria vesca subsp. vesca]	2.10399	0.000381784	0.00126398	yes	up
maker-Fvb6-2-augustus-gene-266.47	PREDICTED: serine/threonine-protein kinase At3g07070-like [Fragaria vesca subsp. vesca]	-2.08932	0.00467588	0.0125808	yes	down		maker-Fvb6-1-snap-gene-328.72	PREDICTED: uncharacterized protein LOC101305085 [Fragaria vesca subsp. vesca]	1.32668	3.89434e-12	2.97757e-11	yes	up
maker-Fvb6-2-augustus-gene-225.36	PREDICTED: DEAD-box ATP-dependent RNA helicase 3, chloroplastic [Fragaria vesca subsp. vesca]	-1.24797	2.02e-127	1.89524e-125	yes	down		augustus_masked-Fvb6-4-processed-gene-207.1	PREDICTED: F-box/LRR-repeat MAX2 homolog A [Fragaria vesca subsp. vesca]	1.74645	1.24741e-15	1.19202e-14	yes	up
maker-Fvb6-3-snap-gene-410.84	PREDICTED: anthocyanidin 3-O-glucoside 2&apos;&apos;-O-glucosyltransferase-like [Fragaria vesca subsp. vesca]	-4.10653	1.38e-18	1.53998e-17	yes	down		maker-Fvb5-2-snap-gene-106.68	PREDICTED: probable metal-nicotianamine transporter YSL7 [Fragaria vesca subsp. vesca]	1.46358	3.02842e-138	3.27348e-136	yes	up
MSTRG.64737	PREDICTED: uncharacterized protein LOC101305980 [Fragaria vesca subsp. vesca]	-1.28543	3.5e-38	7.91621e-37	yes	down		maker-Fvb6-3-augustus-gene-253.34	PREDICTED: syntaxin-121-like [Fragaria vesca subsp. vesca]	1.86905	0.00906088	0.0228112	yes	up
MSTRG.21167	PREDICTED: LOW QUALITY PROTEIN: serine acetyltransferase 1, chloroplastic-like [Fragaria vesca subsp. vesca]	-1.03136	2.88e-34	5.80356e-33	yes	down		maker-Fvb6-1-snap-gene-71.66	PREDICTED: DNA topoisomerase 1-like [Fragaria vesca subsp. vesca]	7.30771	7.29068e-08	3.90398e-07	yes	up
maker-Fvb1-2-augustus-gene-7.39	PREDICTED: uncharacterized membrane protein C776.05 [Fragaria vesca subsp. vesca]	-1.26051	1.56e-13	1.31982e-12	yes	down		augustus_masked-Fvb6-3-processed-gene-105.8	PREDICTED: subtilisin-like protease [Fragaria vesca subsp. vesca]	2.39184	5.97327e-27	9.47574e-26	yes	up
maker-Fvb4-1-snap-gene-88.48	PREDICTED: vesicle transport protein GOT1B [Fragaria vesca subsp. vesca]	-2.11107	0.00186198	0.00544381	yes	down		maker-Fvb6-4-augustus-gene-36.48	auxin-responsive protein IAA4-like [Rosa chinensis]	2.1645	1.69464e-96	1.12045e-94	yes	up
MSTRG.38107	PREDICTED: extensin-2-like isoform X3 [Pyrus x bretschneideri]	-1.16262	1.43e-52	4.53109e-51	yes	down		maker-Fvb1-1-augustus-gene-260.34	PREDICTED: uncharacterized protein LOC101292045 [Fragaria vesca subsp. vesca]	1.85209	3.8264e-149	4.63368e-147	yes	up
maker-Fvb3-3-augustus-gene-4.52	PREDICTED: uncharacterized protein LOC101303095 [Fragaria vesca subsp. vesca]	-1.05566	9.71e-06	4.06343e-05	yes	down		maker-Fvb7-2-augustus-gene-47.30	PREDICTED: cationic amino acid transporter 7, chloroplastic-like [Fragaria vesca subsp. vesca]	1.645	0.00129055	0.00388704	yes	up
maker-Fvb1-3-snap-gene-178.38	PREDICTED: NAD-dependent protein deacetylase SRT2 isoform X1 [Fragaria vesca subsp. vesca]	-1.6298	2.97e-72	1.33867e-70	yes	down		maker-Fvb6-2-augustus-gene-136.20	PREDICTED: uncharacterized protein LOC101300076 isoform X1 [Fragaria vesca subsp. vesca]	1.18562	0.00112102	0.00341436	yes	up
maker-Fvb4-3-augustus-gene-7.34	PREDICTED: non-specific lipid-transfer protein 4 [Fragaria vesca subsp. vesca]	-1.6807	2.04e-16	2.03959e-15	yes	down		augustus_masked-Fvb3-3-processed-gene-243.17	PREDICTED: uncharacterized protein LOC101312901 [Fragaria vesca subsp. vesca]	2.10228	0.000181694	0.000633879	yes	up
MSTRG.62721	PREDICTED: metalloendopeptidase OMA1, mitochondrial-like [Fragaria vesca subsp. vesca]	-1.30716	0.000186563	0.000649839	yes	down		maker-Fvb3-1-augustus-gene-314.53	PREDICTED: tropinone reductase-like 3 [Fragaria vesca subsp. vesca]	1.30641	6.52936e-42	1.6302e-40	yes	up
maker-Fvb1-3-snap-gene-270.27	PREDICTED: uncharacterized protein LOC105350043 [Fragaria vesca subsp. vesca]	-1.95445	0.00198616	0.00577259	yes	down		MSTRG.18931	linoleate 13S-lipoxygenase 3-1, chloroplastic-like isoform X1 [Rosa chinensis]	1.4085	0.0174306	0.0408106	yes	up
maker-Fvb2-2-augustus-gene-221.56	PREDICTED: cleavage and polyadenylation specificity factor subunit 6 [Fragaria vesca subsp. vesca]	-1.96774	2.45e-11	1.77164e-10	yes	down		maker-Fvb7-2-augustus-gene-301.47	PREDICTED: serine/threonine-protein kinase CDL1-like [Fragaria vesca subsp. vesca]	1.27628	0.000991569	0.00305283	yes	up
maker-Fvb4-4-augustus-gene-134.23	PREDICTED: folate-biopterin transporter 1, chloroplastic [Fragaria vesca subsp. vesca]	-1.36485	1.42e-32	2.7067e-31	yes	down		snap_masked-Fvb1-3-processed-gene-89.26	putative EF-hand domain pair protein [Rosa chinensis]	1.13726	0.0179772	0.0419398	yes	up
maker-Fvb2-2-augustus-gene-41.47	PREDICTED: DIS3-like exonuclease 2 [Fragaria vesca subsp. vesca]	-1.60996	1.06e-50	3.23109e-49	yes	down		augustus_masked-Fvb2-2-processed-gene-132.6	PREDICTED: uncharacterized protein LOC101310479 [Fragaria vesca subsp. vesca]	1.40181	3.31401e-12	2.54719e-11	yes	up
maker-Fvb5-4-augustus-gene-33.59	PREDICTED: FAS-associated factor 2-like [Fragaria vesca subsp. vesca]	-1.12808	0.000297253	0.00100028	yes	down		maker-Fvb2-2-augustus-gene-22.52	PREDICTED: cyclin-A2-2 [Fragaria vesca subsp. vesca]	1.9862	0.00260894	0.00740792	yes	up
maker-Fvb3-1-snap-gene-151.38	PREDICTED: fatty acyl-CoA reductase 3-like [Fragaria vesca subsp. vesca]	-1.394	3.76e-10	2.47986e-09	yes	down		maker-Fvb5-3-augustus-gene-273.62	PREDICTED: L-lactate dehydrogenase A [Fragaria vesca subsp. vesca]	1.9463	1.35805e-06	6.33634e-06	yes	up
maker-Fvb1-3-augustus-gene-27.41	PREDICTED: uncharacterized protein LOC101301533 isoform X1 [Fragaria vesca subsp. vesca]	-1.86196	0.0212369	0.0485479	yes	down		maker-Fvb1-4-snap-gene-15.60	PREDICTED: stellacyanin-like [Fragaria vesca subsp. vesca]	1.43849	1.05242e-06	4.97388e-06	yes	up
maker-Fvb5-1-snap-gene-39.81	PREDICTED: short-chain dehydrogenase TIC 32, chloroplastic [Fragaria vesca subsp. vesca]	-1.01798	0.0197621	0.0455917	yes	down		augustus_masked-Fvb2-2-processed-gene-3.19	PREDICTED: transcription factor MYB44-like [Fragaria vesca subsp. vesca]	1.71921	6.46904e-112	5.1356e-110	yes	up
maker-Fvb6-4-augustus-gene-86.46	PREDICTED: mitochondrial uncoupling protein 1-like [Fragaria vesca subsp. vesca]	-1.02495	0.000470456	0.00153488	yes	down		maker-Fvb4-2-augustus-gene-17.42	PREDICTED: protein PLANT CADMIUM RESISTANCE 2-like [Fragaria vesca subsp. vesca]	1.30768	1.81362e-11	1.32409e-10	yes	up
augustus_masked-Fvb6-1-processed-gene-294.7	PREDICTED: probable pyridoxal 5&apos;-phosphate synthase subunit PDX1 [Fragaria vesca subsp. vesca]	-1.55022	3.14e-10	2.08716e-09	yes	down		maker-Fvb4-3-snap-gene-90.56	putative RNA-directed DNA polymerase [Rosa chinensis]	1.72436	5.68686e-05	0.000213681	yes	up
maker-Fvb1-3-augustus-gene-195.35	PREDICTED: probable WRKY transcription factor 47 isoform X1 [Fragaria vesca subsp. vesca]	-1.45148	1.7e-07	8.79063e-07	yes	down		maker-Fvb6-3-augustus-gene-164.33	PREDICTED: protein ASPARTIC PROTEASE IN GUARD CELL 2 [Fragaria vesca subsp. vesca]	1.08076	1.13454e-31	2.1046e-30	yes	up
maker-Fvb7-2-augustus-gene-115.59	PREDICTED: gibberellin 2-beta-dioxygenase 7 [Fragaria vesca subsp. vesca]	-1.48733	3.61e-29	6.19199e-28	yes	down		augustus_masked-Fvb6-4-processed-gene-290.14	PREDICTED: 36.4 kDa proline-rich protein [Fragaria vesca subsp. vesca]	3.08186	1.50848e-19	1.75494e-18	yes	up
maker-Fvb6-2-snap-gene-219.24	PREDICTED: uncharacterized protein LOC101315446 isoform X1 [Fragaria vesca subsp. vesca]	-1.19873	2.94e-37	6.48031e-36	yes	down		maker-Fvb3-1-augustus-gene-31.30	PREDICTED: root phototropism protein 2 [Fragaria vesca subsp. vesca]	2.52465	7.3297e-90	4.39108e-88	yes	up
maker-Fvb4-4-augustus-gene-39.47	PREDICTED: uncharacterized protein At1g04910-like [Fragaria vesca subsp. vesca]	-1.47963	2.45e-65	9.83506e-64	yes	down		maker-Fvb3-2-snap-gene-268.59	PREDICTED: protein O-glucosyltransferase 1 [Fragaria vesca subsp. vesca]	3.27707	4.24622e-40	1.01324e-38	yes	up
MSTRG.43842	PREDICTED: sacsin [Fragaria vesca subsp. vesca]	-3.08796	0	0	yes	down		maker-Fvb3-3-snap-gene-22.51	hypothetical protein RchiOBHm_Chr5g0011631 [Rosa chinensis]	1.1335	2.07375e-05	8.31235e-05	yes	up
snap_masked-Fvb6-4-processed-gene-306.30	PREDICTED: zinc finger CCCH domain-containing protein 3 [Fragaria vesca subsp. vesca]	-1.47582	1.45e-16	1.45991e-15	yes	down		maker-Fvb5-4-augustus-gene-65.42	PREDICTED: glutathione S-transferase U9-like [Fragaria vesca subsp. vesca]	1.26406	0.00151507	0.00450427	yes	up
maker-Fvb1-1-augustus-gene-169.34	2-alkenal reductase (NADP(+)-dependent)-like [Rosa chinensis]	-1.03337	1.91e-23	2.64201e-22	yes	down		maker-Fvb1-2-augustus-gene-229.13	LOW QUALITY PROTEIN: receptor protein kinase TMK1-like [Rosa chinensis]	1.08103	2.61018e-25	3.88805e-24	yes	up
maker-Fvb3-2-augustus-gene-99.44	PREDICTED: B-box zinc finger protein 22 [Fragaria vesca subsp. vesca]	-1.91702	4.67e-90	2.80551e-88	yes	down		snap_masked-Fvb1-3-processed-gene-188.17	PREDICTED: receptor-like serine/threonine-protein kinase At4g25390 [Fragaria vesca subsp. vesca]	3.95629	0	0	yes	up
maker-Fvb4-3-augustus-gene-42.59	PREDICTED: uncharacterized protein At1g04910-like [Fragaria vesca subsp. vesca]	-1.15966	5.07e-17	5.22067e-16	yes	down		augustus_masked-Fvb6-4-processed-gene-49.4	PREDICTED: WW domain-containing protein WWM1-like [Fragaria vesca subsp. vesca]	1.54891	1.4844e-21	1.90021e-20	yes	up
maker-Fvb6-3-augustus-gene-162.37	PREDICTED: uncharacterized protein LOC101299312 [Fragaria vesca subsp. vesca]	-1.27875	3.26e-06	1.45114e-05	yes	down		MSTRG.25110	putative ribosomal protein L7/L12 [Rosa chinensis]	2.24671	0.000625607	0.00199733	yes	up
augustus_masked-Fvb5-1-processed-gene-209.11	PREDICTED: KH domain-containing protein At1g09660/At1g09670 [Fragaria vesca subsp. vesca]	-1.11002	3.37e-23	4.61526e-22	yes	down		snap_masked-Fvb1-3-processed-gene-188.25	hypothetical protein RchiOBHm_Chr2g0123801 [Rosa chinensis]	1.3679	1.42086e-93	9.0636e-92	yes	up
maker-Fvb3-3-augustus-gene-253.33	PREDICTED: omega-3 fatty acid desaturase, endoplasmic reticulum [Fragaria vesca subsp. vesca]	-1.1847	5.53e-65	2.20913e-63	yes	down		maker-Fvb4-4-augustus-gene-18.51	PREDICTED: protein PLANT CADMIUM RESISTANCE 2-like [Fragaria vesca subsp. vesca]	1.25	7.55339e-22	9.77141e-21	yes	up
augustus_masked-Fvb5-4-processed-gene-194.9	PREDICTED: anthocyanidin 5,3-O-glucosyltransferase-like [Fragaria vesca subsp. vesca]	-2.28775	1.53e-17	1.62094e-16	yes	down		augustus_masked-Fvb7-3-processed-gene-115.18	PREDICTED: probable LRR receptor-like serine/threonine-protein kinase At3g47570 [Fragaria vesca subsp. vesca]	1.31424	0.00167206	0.00492863	yes	up
maker-Fvb7-2-augustus-gene-266.60	PREDICTED: uncharacterized protein LOC101314712 [Fragaria vesca subsp. vesca]	-1.57283	1.27e-32	2.42649e-31	yes	down		maker-Fvb6-4-snap-gene-48.53	PREDICTED: probable linoleate 9S-lipoxygenase 5 [Fragaria vesca subsp. vesca]	1.16285	1.73598e-30	3.10397e-29	yes	up
maker-Fvb5-3-snap-gene-204.66	PREDICTED: ninja-family protein 3-like [Fragaria vesca subsp. vesca]	-3.68552	3.94e-23	5.37343e-22	yes	down		maker-Fvb5-1-augustus-gene-33.33	PREDICTED: NAD(P)H-quinone oxidoreductase subunit S, chloroplastic [Fragaria vesca subsp. vesca]	2.81731	7.73617e-82	4.0694e-80	yes	up
maker-Fvb6-4-snap-gene-213.63	PREDICTED: uncharacterized protein C1450.15 [Fragaria vesca subsp. vesca]	-1.09059	6.39e-05	0.000238518	yes	down		augustus_masked-Fvb5-1-processed-gene-19.9	PREDICTED: uncharacterized protein LOC105351808 [Fragaria vesca subsp. vesca]	3.78567	6.7279e-07	3.24177e-06	yes	up
MSTRG.65051	PREDICTED: uncharacterized protein LOC101314695 [Fragaria vesca subsp. vesca]	-1.40855	1.51e-93	9.64384e-92	yes	down		maker-Fvb3-2-augustus-gene-102.33	PREDICTED: protochlorophyllide reductase, chloroplastic [Fragaria vesca subsp. vesca]	1.47004	2.20785e-135	2.29345e-133	yes	up
maker-Fvb3-3-augustus-gene-128.32	PREDICTED: 1,4-alpha-glucan-branching enzyme 3, chloroplastic/amyloplastic isoform X1 [Fragaria vesca subsp. vesca]	-1.13723	1.45e-29	2.52459e-28	yes	down		maker-Fvb3-1-augustus-gene-318.57	PREDICTED: pentatricopeptide repeat-containing protein At4g02750-like [Fragaria vesca subsp. vesca]	2.62593	6.64669e-13	5.37269e-12	yes	up
maker-Fvb7-2-snap-gene-123.67	PREDICTED: delta(8)-fatty-acid desaturase 1-like [Fragaria vesca subsp. vesca]	-2.02599	0	0	yes	down		maker-Fvb3-3-augustus-gene-22.41	PREDICTED: probable WRKY transcription factor 65 isoform X1 [Fragaria vesca subsp. vesca]	1.17721	4.67121e-11	3.29869e-10	yes	up
maker-Fvb7-1-augustus-gene-56.19	chloroplast stem-loop binding protein of 41 kDa b, chloroplastic isoform X4 [Prunus avium]	-1.7339	4.32e-08	2.36475e-07	yes	down		MSTRG.40761	uncharacterized protein LOC112177843 [Rosa chinensis]	4.11517	9.99807e-06	4.17629e-05	yes	up
MSTRG.27680	PREDICTED: geraniol 8-hydroxylase-like [Fragaria vesca subsp. vesca]	-1.39103	8.36e-50	2.50371e-48	yes	down		maker-Fvb2-2-snap-gene-4.88	PREDICTED: isoflavone 2&apos;-hydroxylase-like [Fragaria vesca subsp. vesca]	1.13923	1.98488e-26	3.0871e-25	yes	up
MSTRG.55525	PREDICTED: kelch-like protein 12 isoform X3 [Fragaria vesca subsp. vesca]	-1.78704	0.0203368	0.0467591	yes	down		maker-Fvb1-4-augustus-gene-33.51	PREDICTED: cytokinin dehydrogenase 3 [Fragaria vesca subsp. vesca]	1.52203	0.00364705	0.0100451	yes	up
maker-Fvb2-4-augustus-gene-70.44	PREDICTED: uncharacterized protein LOC101292168 [Fragaria vesca subsp. vesca]	-1.00762	2.12e-10	1.42822e-09	yes	down		maker-Fvb3-2-augustus-gene-89.34	PREDICTED: uncharacterized protein LOC101305830 [Fragaria vesca subsp. vesca]	2.70664	5.94675e-07	2.88611e-06	yes	up
snap_masked-Fvb6-2-processed-gene-184.23	PREDICTED: glutathione S-transferase L3-like isoform X1 [Fragaria vesca subsp. vesca]	-1.45288	4.38e-56	1.4909e-54	yes	down		MSTRG.65819	PREDICTED: protein EXORDIUM-like 3 [Fragaria vesca subsp. vesca]	2.36126	3.93783e-11	2.79957e-10	yes	up
maker-Fvb1-2-augustus-gene-83.56	PREDICTED: dehydrin Xero 2 [Fragaria vesca subsp. vesca]	-1.07252	7.79e-10	5.00832e-09	yes	down		maker-Fvb7-3-augustus-gene-247.31	PREDICTED: uncharacterized protein LOC105352789 [Fragaria vesca subsp. vesca]	2.31675	3.16908e-08	1.76239e-07	yes	up
snap_masked-Fvb5-3-processed-gene-127.7	PREDICTED: uncharacterized protein LOC101314385 isoform X1 [Fragaria vesca subsp. vesca]	-1.41326	4.5e-21	5.64496e-20	yes	down		MSTRG.8147	glucose-6-phosphate 1-dehydrogenase, chloroplastic-like [Rosa chinensis]	5.00644	5.76888e-07	2.80414e-06	yes	up
maker-Fvb1-3-snap-gene-263.44	PREDICTED: uncharacterized protein LOC101310650 [Fragaria vesca subsp. vesca]	-1.08751	0.00124408	0.00375945	yes	down		snap_masked-Fvb1-2-processed-gene-62.28	PREDICTED: protein TIFY 10A [Fragaria vesca subsp. vesca]	1.1453	1.27614e-26	1.99921e-25	yes	up
maker-Fvb4-2-augustus-gene-69.50	PREDICTED: geraniol 8-hydroxylase-like [Fragaria vesca subsp. vesca]	-1.07491	0.0100853	0.0250945	yes	down		maker-Fvb5-3-augustus-gene-160.52	PREDICTED: uncharacterized protein LOC101304099 [Fragaria vesca subsp. vesca]	1.03727	9.53277e-06	3.99356e-05	yes	up
maker-Fvb6-1-augustus-gene-201.55	PREDICTED: 18 kDa seed maturation protein [Fragaria vesca subsp. vesca]	-4.92492	1.28e-14	1.14838e-13	yes	down		augustus_masked-Fvb4-3-processed-gene-142.6	PREDICTED: monothiol glutaredoxin-S2-like [Fragaria vesca subsp. vesca]	1.50273	0.000765905	0.00240673	yes	up
maker-Fvb1-2-snap-gene-131.46	PREDICTED: uncharacterized protein LOC101309103 [Fragaria vesca subsp. vesca]	-3.98885	2.37e-11	1.71365e-10	yes	down		snap_masked-Fvb5-1-processed-gene-200.33	PREDICTED: RING-H2 finger protein ATL52 [Fragaria vesca subsp. vesca]	1.10066	2.23984e-05	8.93814e-05	yes	up
maker-Fvb2-3-augustus-gene-173.19	PREDICTED: auxin response factor 3 [Fragaria vesca subsp. vesca]	-1.08388	5.64e-05	0.00021205	yes	down		maker-Fvb1-3-snap-gene-29.60	programmed cell death-4 [Fragaria vesca]	1.26969	7.73873e-05	0.000285649	yes	up
maker-Fvb6-3-snap-gene-347.71	PREDICTED: endochitinase A-like [Fragaria vesca subsp. vesca]	-1.59904	2.04e-44	5.41282e-43	yes	down		augustus_masked-Fvb7-3-processed-gene-18.11	PREDICTED: cell division control protein 48-like [Fragaria vesca subsp. vesca]	1.90616	9.60474e-07	4.56074e-06	yes	up
maker-Fvb2-3-snap-gene-143.27	PREDICTED: putative laccase-9 [Fragaria vesca subsp. vesca]	-1.22779	1.85e-10	1.24909e-09	yes	down		augustus_masked-Fvb3-2-processed-gene-169.4	PREDICTED: F-box protein At2g27310-like [Fragaria vesca subsp. vesca]	3.28644	2.44521e-10	1.63787e-09	yes	up
MSTRG.37455	histone H1.2 [Prunus persica]	-1.98759	1.65e-12	1.29719e-11	yes	down		augustus_masked-Fvb5-3-processed-gene-247.10	uncharacterized protein LOC112176777 [Rosa chinensis]	2.37032	2.36545e-05	9.41698e-05	yes	up
maker-Fvb4-4-augustus-gene-90.46	hypothetical protein RchiOBHm_Chr4g0426141 [Rosa chinensis]	-1.57441	3.24e-29	5.5653e-28	yes	down		maker-Fvb5-2-augustus-gene-198.31	PREDICTED: beta-xylosidase/alpha-L-arabinofuranosidase 2-like isoform X1 [Fragaria vesca subsp. vesca]	2.61192	5.46968e-84	2.98643e-82	yes	up
maker-Fvb6-1-augustus-gene-363.43	PREDICTED: putative DNA-binding protein ESCAROLA [Fragaria vesca subsp. vesca]	-1.3059	3.95e-22	5.16734e-21	yes	down		maker-Fvb3-4-augustus-gene-57.42	PREDICTED: universal stress protein A-like protein [Fragaria vesca subsp. vesca]	1.59754	2.13556e-21	2.7123e-20	yes	up
maker-Fvb4-3-augustus-gene-270.15	PREDICTED: plant intracellular Ras-group-related LRR protein 6 [Fragaria vesca subsp. vesca]	-3.37107	0.000574714	0.00184735	yes	down		snap_masked-Fvb4-4-processed-gene-36.50	PREDICTED: probable inactive purple acid phosphatase 1 isoform X1 [Fragaria vesca subsp. vesca]	1.06857	7.46065e-20	8.81316e-19	yes	up
maker-Fvb5-2-augustus-gene-99.41	PREDICTED: uncharacterized protein LOC101304870 [Fragaria vesca subsp. vesca]	-1.15667	1.12e-14	1.0111e-13	yes	down		MSTRG.25439	chloroplast envelope membrane protein, partial (plastid) [Fragaria vesca subsp. vesca]	1.45571	0.00037437	0.00124138	yes	up
maker-Fvb4-1-augustus-gene-178.61	PREDICTED: uncharacterized protein LOC101293190 [Fragaria vesca subsp. vesca]	-1.00448	3.31e-07	1.64877e-06	yes	down		maker-Fvb2-1-snap-gene-130.39	PREDICTED: glutathione transferase GST 23-like [Fragaria vesca subsp. vesca]	3.15484	6.41198e-15	5.88991e-14	yes	up
maker-Fvb6-2-augustus-gene-287.49	PREDICTED: probable galactinol--sucrose galactosyltransferase 5 [Fragaria vesca subsp. vesca]	-1.72424	0.000120008	0.000430036	yes	down		maker-Fvb1-3-augustus-gene-69.57	PREDICTED: bifunctional epoxide hydrolase 2-like [Fragaria vesca subsp. vesca]	1.78248	0.00429108	0.011651	yes	up
augustus_masked-Fvb7-4-processed-gene-125.12	PREDICTED: probable carboxylesterase 8 [Fragaria vesca subsp. vesca]	-1.25026	0.00593014	0.0155603	yes	down		maker-Fvb7-2-augustus-gene-119.44	PREDICTED: ferric reduction oxidase 2-like isoform X2 [Fragaria vesca subsp. vesca]	1.48501	7.1309e-05	0.000264593	yes	up
maker-Fvb6-3-snap-gene-383.87	alpha-galactosidase-like [Rosa chinensis]	-1.44625	1.1e-10	7.51288e-10	yes	down		maker-Fvb2-4-augustus-gene-257.44	PREDICTED: BTB/POZ domain-containing protein At2g30600 [Fragaria vesca subsp. vesca]	1.71242	0	0	yes	up
maker-Fvb6-2-snap-gene-197.50	uracil phosphoribosyltransferase isoform X2 [Rosa chinensis]	-1.61276	2.61e-09	1.60861e-08	yes	down		snap_masked-Fvb4-1-processed-gene-193.22	PREDICTED: myosin heavy chain kinase B [Fragaria vesca subsp. vesca]	4.02659	4.90479e-22	6.38885e-21	yes	up
maker-Fvb3-3-augustus-gene-106.27	PREDICTED: NAC domain-containing protein 72-like [Fragaria vesca subsp. vesca]	-3.47828	4.73e-08	2.57645e-07	yes	down		maker-Fvb1-1-snap-gene-263.62	PREDICTED: 36.4 kDa proline-rich protein [Fragaria vesca subsp. vesca]	4.13023	5.4719e-41	1.33455e-39	yes	up
maker-Fvb5-4-augustus-gene-84.42	PREDICTED: tetratricopeptide repeat protein 1 [Fragaria vesca subsp. vesca]	-1.39937	1.7e-07	8.75802e-07	yes	down		maker-Fvb6-1-augustus-gene-334.58	PREDICTED: UPF0603 protein At1g54780, chloroplastic [Fragaria vesca subsp. vesca]	1.24656	7.63247e-86	4.2835e-84	yes	up
snap_masked-Fvb2-1-processed-gene-6.21	PREDICTED: MADS-box transcription factor 6-like [Fragaria vesca subsp. vesca]	-2.32211	0.0028081	0.00792547	yes	down		maker-Fvb3-2-augustus-gene-206.23	PREDICTED: disease resistance protein At4g27190-like [Pyrus x bretschneideri]	1.63378	4.18884e-39	9.72646e-38	yes	up
maker-Fvb5-3-augustus-gene-216.48	PREDICTED: probable trehalase [Fragaria vesca subsp. vesca]	-2.04191	0.00040018	0.00132111	yes	down		augustus_masked-Fvb5-1-processed-gene-19.0	PREDICTED: uncharacterized protein LOC101295050 [Fragaria vesca subsp. vesca]	1.66842	8.71593e-24	1.2227e-22	yes	up
maker-Fvb4-2-augustus-gene-217.20	uncharacterized protein LOC112197486 [Rosa chinensis]	-1.23842	0.000119151	0.000427235	yes	down		MSTRG.46189	PREDICTED: F-box/LRR-repeat protein 13 [Fragaria vesca subsp. vesca]	1.73335	1.62388e-39	3.82159e-38	yes	up
snap_masked-Fvb6-3-processed-gene-22.39	PREDICTED: WAT1-related protein At5g40240-like isoform X2 [Fragaria vesca subsp. vesca]	-1.2747	1.18e-71	5.26544e-70	yes	down		maker-Fvb4-3-snap-gene-206.57	PREDICTED: transcription elongation factor SPT4 homolog 2-like [Fragaria vesca subsp. vesca]	1.07078	3.70409e-13	3.04741e-12	yes	up
maker-Fvb4-1-augustus-gene-133.46	PREDICTED: geraniol 8-hydroxylase-like [Fragaria vesca subsp. vesca]	-1.39103	8.36e-50	2.50371e-48	yes	down		maker-Fvb2-3-augustus-gene-6.43	PREDICTED: probable plastid-lipid-associated protein 8, chloroplastic [Fragaria vesca subsp. vesca]	1.14113	1.39764e-75	6.64218e-74	yes	up
snap_masked-Fvb6-2-processed-gene-317.39	PREDICTED: late embryogenesis abundant protein 2-like isoform X2 [Fragaria vesca subsp. vesca]	-2.77968	8.03e-48	2.30365e-46	yes	down		augustus_masked-Fvb6-1-processed-gene-28.17	PREDICTED: zinc finger AN1 domain-containing stress-associated protein 12 [Fragaria vesca subsp. vesca]	4.58964	1.01662e-09	6.48865e-09	yes	up
augustus_masked-Fvb2-2-processed-gene-244.3	PREDICTED: glycine-rich RNA-binding, abscisic acid-inducible protein-like isoform X1 [Fragaria vesca subsp. vesca]	-1.95693	5.36e-195	1.03088e-192	yes	down		augustus_masked-Fvb1-3-processed-gene-157.4	PREDICTED: G-type lectin S-receptor-like serine/threonine-protein kinase RLK1 [Fragaria vesca subsp. vesca]	1.5791	6.19068e-59	2.227e-57	yes	up
maker-Fvb5-3-augustus-gene-251.54	PREDICTED: anthocyanidin reductase-like isoform X1 [Fragaria vesca subsp. vesca]	-1.40088	6.51e-41	1.58511e-39	yes	down		maker-Fvb6-2-augustus-gene-26.18	TMV resistance protein N-like [Rosa chinensis]	3.83253	0.0178328	0.0416426	yes	up
maker-Fvb6-2-augustus-gene-11.25	PREDICTED: beta-amyrin synthase-like [Fragaria vesca subsp. vesca]	-4.13601	0	0	yes	down		maker-Fvb6-3-augustus-gene-78.45	PREDICTED: wall-associated receptor kinase-like 8 [Fragaria vesca subsp. vesca]	2.43049	0.021297	0.0486559	yes	up
maker-Fvb4-3-augustus-gene-145.27	PREDICTED: sodium/hydrogen exchanger 2-like [Fragaria vesca subsp. vesca]	-1.24168	4.51e-19	5.15236e-18	yes	down		augustus_masked-Fvb3-4-processed-gene-207.5	PREDICTED: mediator of RNA polymerase II transcription subunit 19a-like [Fragaria vesca subsp. vesca]	2.01005	2.32837e-20	2.82375e-19	yes	up
maker-Fvb2-2-snap-gene-74.78	PREDICTED: uncharacterized protein LOC105349632 isoform X3 [Fragaria vesca subsp. vesca]	-1.4432	0.00679675	0.0176038	yes	down		maker-Fvb2-2-augustus-gene-190.22	PREDICTED: UPF0496 protein At4g34330 [Fragaria vesca subsp. vesca]	2.27247	2.15408e-23	2.97709e-22	yes	up
snap_masked-Fvb3-4-processed-gene-223.31	PREDICTED: programmed cell death protein 2 [Fragaria vesca subsp. vesca]	-1.08029	4.6e-09	2.77886e-08	yes	down		maker-Fvb2-4-augustus-gene-13.32	PREDICTED: squalene monooxygenase-like [Fragaria vesca subsp. vesca]	2.32509	5.92006e-42	1.4797e-40	yes	up
augustus_masked-Fvb7-4-processed-gene-40.8	PREDICTED: adenine/guanine permease AZG1 [Fragaria vesca subsp. vesca]	-1.14442	3.49e-11	2.49081e-10	yes	down		MSTRG.58364	ABC transporter B family member 11-like [Rosa chinensis]	2.17037	0.00908607	0.0228698	yes	up
maker-Fvb3-2-augustus-gene-260.21	PREDICTED: methylsterol monooxygenase 2-2 isoform X1 [Fragaria vesca subsp. vesca]	-2.11995	7.33e-88	4.25683e-86	yes	down		augustus_masked-Fvb2-2-processed-gene-115.2	PREDICTED: uncharacterized protein LOC101297805 [Fragaria vesca subsp. vesca]	1.30887	1.19835e-08	6.964e-08	yes	up
maker-Fvb6-1-augustus-gene-9.34	PREDICTED: squamosa promoter-binding-like protein 13A [Fragaria vesca subsp. vesca]	-1.61571	4.5e-31	8.19272e-30	yes	down		snap_masked-Fvb2-1-processed-gene-217.33	PREDICTED: probable strigolactone esterase DAD2 [Fragaria vesca subsp. vesca]	1.57122	3.91344e-07	1.93749e-06	yes	up
maker-Fvb1-1-augustus-gene-242.43	PREDICTED: WD-40 repeat-containing protein MSI4 [Fragaria vesca subsp. vesca]	-1.02914	1.89e-44	5.00292e-43	yes	down		maker-Fvb6-1-augustus-gene-315.60	PREDICTED: pyroglutamyl-peptidase 1-like protein [Fragaria vesca subsp. vesca]	1.73353	1.49663e-77	7.3003e-76	yes	up
maker-Fvb5-2-snap-gene-24.40	PREDICTED: GDT1-like protein 1, chloroplastic [Fragaria vesca subsp. vesca]	-1.00156	2.22e-55	7.43961e-54	yes	down		maker-Fvb7-3-augustus-gene-21.24	PREDICTED: wall-associated receptor kinase 1-like isoform X2 [Fragaria vesca subsp. vesca]	3.30014	2.76678e-88	1.61793e-86	yes	up
maker-Fvb5-1-augustus-gene-252.38	PREDICTED: thioredoxin domain-containing protein PLP3A-like [Fragaria vesca subsp. vesca]	-1.47167	6.54e-16	6.33816e-15	yes	down		maker-Fvb7-1-augustus-gene-0.33	PREDICTED: uncharacterized protein LOC105352787 [Fragaria vesca subsp. vesca]	5.10481	1.41919e-12	1.12272e-11	yes	up
MSTRG.37192	PREDICTED: serine/threonine-protein kinase CDG1-like [Fragaria vesca subsp. vesca]	-1.22191	3.99e-14	3.488e-13	yes	down		MSTRG.28662	G-type lectin S-receptor-like serine/threonine-protein kinase At1g34300 [Rosa chinensis]	1.74004	3.67506e-15	3.42445e-14	yes	up
maker-Fvb1-3-snap-gene-207.26	PREDICTED: ALA-interacting subunit 3-like [Fragaria vesca subsp. vesca]	-1.94805	1.71e-19	1.98373e-18	yes	down		maker-Fvb6-1-snap-gene-345.71	PREDICTED: probable disease resistance protein At4g27220 isoform X1 [Fragaria vesca subsp. vesca]	1.42912	9.87182e-23	1.32651e-21	yes	up
maker-Fvb2-4-augustus-gene-217.61	PREDICTED: chlorophyllase-1 [Fragaria vesca subsp. vesca]	-1.65646	5.75e-121	5.0437e-119	yes	down		augustus_masked-Fvb1-4-processed-gene-68.5	PREDICTED: UPF0496 protein At2g18630-like [Fragaria vesca subsp. vesca]	1.46628	4.88243e-19	5.56156e-18	yes	up
maker-Fvb5-3-augustus-gene-208.61	PREDICTED: uncharacterized protein LOC101315349 [Fragaria vesca subsp. vesca]	-1.46916	8.65e-36	1.8278e-34	yes	down		maker-Fvb2-4-snap-gene-58.26	PREDICTED: BURP domain-containing protein 3-like [Fragaria vesca subsp. vesca]	2.63375	0.000296971	0.000999477	yes	up
augustus_masked-Fvb2-3-processed-gene-207.6	PREDICTED: fasciclin-like arabinogalactan protein 19 [Fragaria vesca subsp. vesca]	-2.89904	2.84e-05	0.000111824	yes	down		MSTRG.11884	PREDICTED: auxin-induced protein 15A-like [Fragaria vesca subsp. vesca]	1.35441	7.30757e-14	6.29627e-13	yes	up
augustus_masked-Fvb5-3-processed-gene-268.6	PREDICTED: armadillo repeat-containing kinesin-like protein 3 [Fragaria vesca subsp. vesca]	-1.24227	6.23e-37	1.35872e-35	yes	down		snap_masked-Fvb2-3-processed-gene-76.34	PREDICTED: uncharacterized protein LOC105349822 [Fragaria vesca subsp. vesca]	3.70845	1.018e-30	1.83542e-29	yes	up
maker-Fvb6-1-snap-gene-240.40	PREDICTED: pentatricopeptide repeat-containing protein At5g27110-like [Fragaria vesca subsp. vesca]	-1.08052	4.32e-21	5.42162e-20	yes	down		maker-Fvb5-1-augustus-gene-36.69	PREDICTED: probable alpha,alpha-trehalose-phosphate synthase [UDP-forming] 9 [Fragaria vesca subsp. vesca]	1.98077	2.02811e-24	2.91462e-23	yes	up
snap_masked-Fvb6-1-processed-gene-40.50	UDP-glycosyltransferase 708C1-like [Rosa chinensis]	-2.06579	0.0167948	0.0394842	yes	down		MSTRG.61806	PREDICTED: RING-H2 zinc finger protein RHA1a [Fragaria vesca subsp. vesca]	3.13513	4.44165e-14	3.87302e-13	yes	up
maker-Fvb4-2-augustus-gene-23.33	PREDICTED: probable sulfate transporter 3.3 [Fragaria vesca subsp. vesca]	-1.39955	1.32e-61	4.96807e-60	yes	down		maker-Fvb6-3-augustus-gene-31.47	hypothetical protein RchiOBHm_Chr2g0167761 [Rosa chinensis]	1.72894	7.15091e-21	8.86582e-20	yes	up
maker-Fvb1-4-augustus-gene-86.47	PREDICTED: probable LRR receptor-like serine/threonine-protein kinase At4g37250 [Fragaria vesca subsp. vesca]	-1.14098	5.77e-11	4.05295e-10	yes	down		maker-Fvb2-3-augustus-gene-16.33	AUX1 [Fragaria x ananassa]	1.7101	2.77709e-49	8.22065e-48	yes	up
augustus_masked-Fvb6-2-processed-gene-160.5	PREDICTED: probable C-terminal domain small phosphatase [Fragaria vesca subsp. vesca]	-2.07466	1.18e-30	2.12325e-29	yes	down		maker-Fvb6-2-augustus-gene-320.40	PREDICTED: uncharacterized protein LOC101293506 [Fragaria vesca subsp. vesca]	1.53803	2.41739e-102	1.71472e-100	yes	up
maker-Fvb4-1-augustus-gene-167.52	PREDICTED: ninja-family protein AFP2-like [Fragaria vesca subsp. vesca]	-2.16068	4.86e-70	2.10896e-68	yes	down		maker-Fvb3-1-augustus-gene-42.43	PREDICTED: mitogen-activated protein kinase kinase kinase ANP1-like [Fragaria vesca subsp. vesca]	1.11912	0.0056837	0.0149731	yes	up
augustus_masked-Fvb3-4-processed-gene-59.3	PREDICTED: transcription factor PCL1 [Fragaria vesca subsp. vesca]	-4.72127	1.34e-178	2.22223e-176	yes	down		augustus_masked-Fvb3-2-processed-gene-283.10	PREDICTED: CBL-interacting serine/threonine-protein kinase 11 [Fragaria vesca subsp. vesca]	1.66435	6.73775e-21	8.36388e-20	yes	up
augustus_masked-Fvb5-1-processed-gene-275.10	PREDICTED: isoamylase 3, chloroplastic [Fragaria vesca subsp. vesca]	-1.9304	0	0	yes	down		maker-Fvb3-3-augustus-gene-44.66	PREDICTED: beta-amyrin 28-oxidase-like [Fragaria vesca subsp. vesca]	1.72445	2.99862e-141	3.31646e-139	yes	up
maker-Fvb7-2-augustus-gene-257.45	PREDICTED: acid phosphatase 1 [Fragaria vesca subsp. vesca]	-1.49374	0.00119821	0.00363007	yes	down		MSTRG.1982	PREDICTED: putative nuclease HARBI1 [Fragaria vesca subsp. vesca]	2.87579	8.58876e-51	2.62299e-49	yes	up
snap_masked-Fvb1-4-processed-gene-29.31	PREDICTED: probable caffeoyl-CoA O-methyltransferase At4g26220 [Fragaria vesca subsp. vesca]	-1.82252	6.91e-100	4.7226e-98	yes	down		maker-Fvb6-2-snap-gene-325.85	PREDICTED: uncharacterized protein LOC101304600 [Fragaria vesca subsp. vesca]	1.40971	1.24264e-06	5.82186e-06	yes	up
snap_masked-Fvb7-1-processed-gene-279.21	PREDICTED: peptidyl-prolyl cis-trans isomerase FKBP53 [Fragaria vesca subsp. vesca]	-1.91824	5.13e-80	2.59291e-78	yes	down		maker-Fvb7-4-snap-gene-219.17	PREDICTED: vicianin hydrolase-like [Fragaria vesca subsp. vesca]	2.56689	8.58297e-217	1.93879e-214	yes	up
maker-Fvb7-3-augustus-gene-233.34	PREDICTED: cinnamoyl-CoA reductase 1-like [Fragaria vesca subsp. vesca]	-1.13187	2.9e-25	4.31252e-24	yes	down		maker-Fvb5-4-augustus-gene-83.38	PREDICTED: protein REVEILLE 7-like isoform X1 [Fragaria vesca subsp. vesca]	2.08427	8.97481e-43	2.2887e-41	yes	up
maker-Fvb3-3-snap-gene-114.62	PREDICTED: scarecrow-like protein 21 [Fragaria vesca subsp. vesca]	-1.09472	6.86e-29	1.1646e-27	yes	down		maker-Fvb4-2-snap-gene-20.52	G-type lectin S-receptor-like serine/threonine-protein kinase At1g34300 [Rosa chinensis]	1.71011	6.63841e-67	2.73698e-65	yes	up
MSTRG.34650	hypothetical protein RchiOBHm_Chr7g0204351 [Rosa chinensis]	-2.82196	2.94e-41	7.20746e-40	yes	down		maker-Fvb6-2-augustus-gene-290.45	PREDICTED: apoptosis-enhancing nuclease isoform X1 [Fragaria vesca subsp. vesca]	2.03057	0.000540424	0.00174491	yes	up
maker-Fvb4-2-snap-gene-27.54	PREDICTED: probable serine/threonine-protein kinase NAK [Fragaria vesca subsp. vesca]	-4.31675	0.00802214	0.0204589	yes	down		maker-Fvb3-1-augustus-gene-257.21	PREDICTED: transcription factor JUNGBRUNNEN 1-like [Fragaria vesca subsp. vesca]	2.57489	4.55833e-13	3.72517e-12	yes	up
maker-Fvb6-4-augustus-gene-96.35	PREDICTED: uncharacterized protein LOC101303240 [Fragaria vesca subsp. vesca]	-1.33226	9.53e-09	5.58974e-08	yes	down		snap_masked-Fvb3-4-processed-gene-193.27	PREDICTED: ethylene-responsive transcription factor 4 [Fragaria vesca subsp. vesca]	2.29417	7.14967e-83	3.82079e-81	yes	up
augustus_masked-Fvb2-2-processed-gene-102.8	PREDICTED: uncharacterized protein ycf39 [Fragaria vesca subsp. vesca]	-1.15413	2.94e-56	1.00432e-54	yes	down		maker-Fvb6-3-augustus-gene-52.49	PREDICTED: G-type lectin S-receptor-like serine/threonine-protein kinase At4g27290 [Fragaria vesca subsp. vesca]	2.65711	1.29501e-38	2.96821e-37	yes	up
MSTRG.64455	probable RNA helicase SDE3 isoform X2 [Rosa chinensis]	-1.3421	0.000799758	0.00250425	yes	down		maker-Fvb6-4-snap-gene-5.73	PREDICTED: CASP-like protein 4A1 [Fragaria vesca subsp. vesca]	1.07648	6.54654e-18	7.05943e-17	yes	up
MSTRG.32913	putative ribonuclease H [Rosa chinensis]	-5.1974	0.000499706	0.00162341	yes	down		maker-Fvb3-3-augustus-gene-9.46	PREDICTED: uncharacterized protein LOC101293374 [Fragaria vesca subsp. vesca]	1.72203	0.00152519	0.0045313	yes	up
maker-Fvb2-3-augustus-gene-5.51	PREDICTED: selenoprotein H [Fragaria vesca subsp. vesca]	-1.54324	5.39e-25	7.92314e-24	yes	down		maker-Fvb1-1-augustus-gene-254.44	PREDICTED: dynein light chain 1, cytoplasmic-like [Fragaria vesca subsp. vesca]	2.14336	8.01051e-06	3.38844e-05	yes	up
maker-Fvb7-4-augustus-gene-106.50	PREDICTED: LOW QUALITY PROTEIN: uncharacterized protein LOC101302880 [Fragaria vesca subsp. vesca]	-2.02647	6.45e-27	1.02108e-25	yes	down		maker-Fvb2-4-snap-gene-11.44	PREDICTED: squalene monooxygenase-like [Fragaria vesca subsp. vesca]	1.08317	4.26977e-45	1.15005e-43	yes	up
maker-Fvb1-4-augustus-gene-35.55	PREDICTED: UBP1-associated proteins 1C [Fragaria vesca subsp. vesca]	-1.08743	3.47e-06	1.53758e-05	yes	down		maker-Fvb7-1-augustus-gene-306.53	PREDICTED: heat shock protein 83-like [Fragaria vesca subsp. vesca]	1.75744	1.66085e-62	6.41542e-61	yes	up
maker-Fvb2-1-augustus-gene-46.22	PREDICTED: glycine-rich RNA-binding, abscisic acid-inducible protein-like isoform X1 [Fragaria vesca subsp. vesca]	-2.64898	5.22e-250	1.53639e-247	yes	down		maker-Fvb1-4-snap-gene-169.24	PREDICTED: galactinol synthase 2-like [Fragaria vesca subsp. vesca]	1.23566	4.96153e-17	5.11344e-16	yes	up
maker-Fvb5-1-snap-gene-42.85	PREDICTED: C2 and GRAM domain-containing protein At5g50170 [Fragaria vesca subsp. vesca]	-2.95072	2.37e-06	1.07033e-05	yes	down		maker-Fvb1-1-snap-gene-166.27	PREDICTED: rhamnogalacturonate lyase B-like [Fragaria vesca subsp. vesca]	6.79173	3.58539e-08	1.98223e-07	yes	up
maker-Fvb6-3-augustus-gene-164.34	PREDICTED: AP2-like ethylene-responsive transcription factor At1g16060 [Fragaria vesca subsp. vesca]	-1.90333	0.0134133	0.0323273	yes	down		augustus_masked-Fvb5-1-processed-gene-268.5	PREDICTED: mitochondrial uncoupling protein 4 [Fragaria vesca subsp. vesca]	1.9647	5.213e-13	4.24792e-12	yes	up
maker-Fvb2-4-augustus-gene-207.30	PREDICTED: lactation elevated protein 1 [Fragaria vesca subsp. vesca]	-3.17164	3.79e-118	3.22362e-116	yes	down		maker-Fvb7-4-augustus-gene-79.30	PREDICTED: serine carboxypeptidase-like 27 [Fragaria vesca subsp. vesca]	1.19994	1.52223e-136	1.60705e-134	yes	up
maker-Fvb5-1-augustus-gene-209.50	DExH-box ATP-dependent RNA helicase DExH3 [Prunus persica]	-1.60586	8.14e-38	1.82208e-36	yes	down		maker-Fvb4-2-augustus-gene-10.52	PREDICTED: formin-like protein 8 [Fragaria vesca subsp. vesca]	2.19529	3.53649e-10	2.33926e-09	yes	up
maker-Fvb1-4-snap-gene-98.54	PREDICTED: uncharacterized protein LOC101304225 [Fragaria vesca subsp. vesca]	-1.00994	1.89e-15	1.78687e-14	yes	down		maker-Fvb6-1-snap-gene-298.73	PREDICTED: bifunctional epoxide hydrolase 2-like [Fragaria vesca subsp. vesca]	2.90041	2.39738e-05	9.53404e-05	yes	up
snap_masked-Fvb1-3-processed-gene-185.15	PREDICTED: uncharacterized protein LOC101309584 [Fragaria vesca subsp. vesca]	-1.50498	3.62e-58	1.28408e-56	yes	down		maker-Fvb6-3-snap-gene-381.50	PREDICTED: probable linoleate 9S-lipoxygenase 5 [Fragaria vesca subsp. vesca]	1.52749	9.21558e-119	7.95006e-117	yes	up
snap_masked-Fvb6-1-processed-gene-120.19	PREDICTED: protein ELF4-LIKE 4-like [Fragaria vesca subsp. vesca]	-1.12916	7.93e-21	9.81879e-20	yes	down		snap_masked-Fvb7-4-processed-gene-73.29	PREDICTED: putative serine/threonine-protein kinase [Fragaria vesca subsp. vesca]	3.7837	1.70172e-09	1.06718e-08	yes	up
maker-Fvb6-1-augustus-gene-293.66	PREDICTED: endochitinase A-like [Fragaria vesca subsp. vesca]	-1.8381	9.94e-61	3.68591e-59	yes	down		maker-Fvb4-1-snap-gene-10.51	putative protein kinase RLK-Pelle-DLSV family [Rosa chinensis]	1.33032	0.000135243	0.000481033	yes	up
MSTRG.7569	PREDICTED: NAC domain-containing protein 2-like [Fragaria vesca subsp. vesca]	-1.52408	1.8e-118	1.54308e-116	yes	down		augustus_masked-Fvb2-3-processed-gene-92.7	PREDICTED: RING-H2 finger protein ATL54-like [Fragaria vesca subsp. vesca]	1.44488	9.17803e-07	4.36843e-06	yes	up
maker-Fvb6-1-augustus-gene-230.34	PREDICTED: B3 domain-containing protein At2g36080-like [Fragaria vesca subsp. vesca]	-1.55537	0.00096592	0.00297893	yes	down		MSTRG.9133	PREDICTED: uncharacterized protein LOC101301347 [Fragaria vesca subsp. vesca]	2.0913	3.05561e-49	9.03329e-48	yes	up
augustus_masked-Fvb3-4-processed-gene-150.13	PREDICTED: uncharacterized protein LOC105349931 [Fragaria vesca subsp. vesca]	-5.94075	5.83e-124	5.28531e-122	yes	down		maker-Fvb2-4-augustus-gene-41.39	PREDICTED: CDPK-related kinase 5-like [Fragaria vesca subsp. vesca]	1.2775	2.9702e-37	6.53494e-36	yes	up
maker-Fvb5-2-augustus-gene-58.65	PREDICTED: oligopeptide transporter 7 [Fragaria vesca subsp. vesca]	-2.3301	1.53e-95	9.98558e-94	yes	down		MSTRG.36025	PREDICTED: thioredoxin-like 1-2, chloroplastic [Fragaria vesca subsp. vesca]	1.73994	2.6909e-20	3.25253e-19	yes	up
snap_masked-Fvb2-3-processed-gene-41.33	PREDICTED: GDSL esterase/lipase EXL3-like [Fragaria vesca subsp. vesca]	-3.37624	9.09e-10	5.82459e-09	yes	down		MSTRG.56002	PREDICTED: uncharacterized protein LOC101291844 [Fragaria vesca subsp. vesca]	1.13474	2.56128e-08	1.44021e-07	yes	up
maker-Fvb3-3-augustus-gene-241.30	PREDICTED: flocculation protein FLO11 [Fragaria vesca subsp. vesca]	-1.07317	2.66e-114	2.16778e-112	yes	down		MSTRG.31783	PREDICTED: major allergen Pru ar 1-like [Fragaria vesca subsp. vesca]	4.35331	2.78404e-33	5.4151e-32	yes	up
maker-Fvb4-1-augustus-gene-24.34	PREDICTED: uncharacterized protein LOC101302544 isoform X1 [Fragaria vesca subsp. vesca]	-1.60415	3.44e-09	2.09975e-08	yes	down		snap_masked-Fvb3-2-processed-gene-124.17	PREDICTED: myosin-2 [Fragaria vesca subsp. vesca]	2.09132	0	0	yes	up
maker-Fvb3-4-snap-gene-77.43	hypothetical protein RchiOBHm_Chr6g0295101 [Rosa chinensis]	-1.33322	9.3e-30	1.62684e-28	yes	down		maker-Fvb1-2-snap-gene-178.28	PREDICTED: laccase-15-like isoform X2 [Fragaria vesca subsp. vesca]	2.86314	7.17294e-09	4.25579e-08	yes	up
augustus_masked-Fvb4-2-processed-gene-38.8	PREDICTED: uncharacterized protein LOC101298991 isoform X2 [Fragaria vesca subsp. vesca]	-4.3175	0.00530936	0.0140906	yes	down		maker-Fvb5-3-augustus-gene-238.71	PREDICTED: probable pectate lyase 18 [Fragaria vesca subsp. vesca]	1.31261	2.79543e-70	1.22148e-68	yes	up
maker-Fvb2-2-augustus-gene-235.27	PREDICTED: uncharacterized protein LOC101314035 [Fragaria vesca subsp. vesca]	-1.00062	2.89e-08	1.61536e-07	yes	down		augustus_masked-Fvb7-2-processed-gene-272.12	PREDICTED: dehydration-responsive element-binding protein 1B-like [Fragaria vesca subsp. vesca]	3.99566	7.34067e-06	3.12523e-05	yes	up
maker-Fvb1-4-augustus-gene-61.56	PREDICTED: dehydrin Xero 2 [Fragaria vesca subsp. vesca]	-2.13497	5.94e-50	1.78263e-48	yes	down		maker-Fvb1-2-augustus-gene-40.30	PREDICTED: uncharacterized protein LOC101292045 [Fragaria vesca subsp. vesca]	1.26356	1.36732e-53	4.41543e-52	yes	up
maker-Fvb4-2-augustus-gene-134.25	PREDICTED: serine hydroxymethyltransferase 4 [Fragaria vesca subsp. vesca]	-1.0785	6.8e-52	2.1239e-50	yes	down		maker-Fvb3-2-augustus-gene-30.63	PREDICTED: farnesyl pyrophosphate synthase 1 [Fragaria vesca subsp. vesca]	1.06737	1.78962e-43	4.65152e-42	yes	up
maker-Fvb1-4-snap-gene-113.39	PREDICTED: lanC-like protein GCL1 [Fragaria vesca subsp. vesca]	-1.8698	2.99e-98	2.01249e-96	yes	down		maker-Fvb6-1-augustus-gene-354.50	PREDICTED: U5 small nuclear ribonucleoprotein 200 kDa helicase-like [Fragaria vesca subsp. vesca]	2.2132	2.39375e-08	1.35028e-07	yes	up
maker-Fvb5-2-augustus-gene-244.33	PREDICTED: nitrate reductase [NADH]-like [Fragaria vesca subsp. vesca]	-1.63997	3.34e-85	1.85697e-83	yes	down		maker-Fvb6-4-snap-gene-295.56	PREDICTED: 7-deoxyloganetin glucosyltransferase-like [Fragaria vesca subsp. vesca]	1.45347	1.18184e-08	6.87288e-08	yes	up
maker-Fvb4-3-snap-gene-293.64	PREDICTED: CRIB domain-containing protein RIC6-like [Fragaria vesca subsp. vesca]	-2.86849	0.000948719	0.00293136	yes	down		maker-Fvb7-2-snap-gene-139.67	PREDICTED: transcription initiation factor IIB-2 [Fragaria vesca subsp. vesca]	4.00043	0.0028869	0.00812787	yes	up
maker-Fvb6-1-augustus-gene-253.50	PREDICTED: TSL-kinase interacting protein 1 isoform X2 [Fragaria vesca subsp. vesca]	-1.06088	7.78e-46	2.13726e-44	yes	down		MSTRG.28268	PREDICTED: probable xyloglucan endotransglucosylase/hydrolase protein 33 [Fragaria vesca subsp. vesca]	1.73807	2.01077e-80	1.02728e-78	yes	up
maker-Fvb7-3-augustus-gene-133.36	putative microtubule-associated protein, MAP65/Ase1/PRC1 [Rosa chinensis]	-1.95369	3.41e-23	4.67518e-22	yes	down		augustus_masked-Fvb6-3-processed-gene-370.3	PREDICTED: pleiotropic drug resistance protein 3-like isoform X2 [Fragaria vesca subsp. vesca]	1.3033	1.54803e-65	6.24596e-64	yes	up
maker-Fvb7-4-augustus-gene-83.28	PREDICTED: thioredoxin-like 3-2, chloroplastic [Fragaria vesca subsp. vesca]	-1.00013	3.87e-08	2.12817e-07	yes	down		maker-Fvb6-2-augustus-gene-49.24	PREDICTED: extradiol ring-cleavage dioxygenase-like [Fragaria vesca subsp. vesca]	1.35463	3.28521e-14	2.8863e-13	yes	up
maker-Fvb6-1-snap-gene-248.42	PREDICTED: uncharacterized protein LOC101306718 [Fragaria vesca subsp. vesca]	-1.2192	5.39e-36	1.14464e-34	yes	down		augustus_masked-Fvb5-3-processed-gene-259.12	PREDICTED: BTB/POZ domain-containing protein At5g41330 [Fragaria vesca subsp. vesca]	1.39589	1.2882e-10	8.79722e-10	yes	up
maker-Fvb6-1-snap-gene-21.48	PREDICTED: J protein JJJ1-like [Fragaria vesca subsp. vesca]	-1.67491	1.19e-198	2.35156e-196	yes	down		maker-Fvb7-4-snap-gene-141.51	PREDICTED: carotenoid cleavage dioxygenase 7, chloroplastic [Fragaria vesca subsp. vesca]	1.73838	3.5513e-05	0.000137706	yes	up
maker-Fvb7-4-snap-gene-188.20	PREDICTED: uncharacterized protein LOC101310161 [Fragaria vesca subsp. vesca]	-1.17987	2.68e-111	2.11751e-109	yes	down		augustus_masked-Fvb4-2-processed-gene-65.7	PREDICTED: vinorine synthase-like [Fragaria vesca subsp. vesca]	2.7527	2.47621e-38	5.62996e-37	yes	up
maker-Fvb5-4-augustus-gene-155.35	PREDICTED: probable cellulose synthase A catalytic subunit 3 [UDP-forming] [Fragaria vesca subsp. vesca]	-1.09949	2.88e-97	1.91706e-95	yes	down		augustus_masked-Fvb3-2-processed-gene-39.8	precursor of CEP14 [Rosa chinensis]	1.82949	0.000515519	0.00167047	yes	up
maker-Fvb7-1-augustus-gene-306.62	PREDICTED: beta-carotene hydroxylase 2, chloroplastic-like [Fragaria vesca subsp. vesca]	-1.36492	3.49e-75	1.64591e-73	yes	down		maker-Fvb2-1-snap-gene-233.59	PREDICTED: myosin heavy chain kinase B-like [Fragaria vesca subsp. vesca]	3.28369	7.7979e-20	9.19715e-19	yes	up
maker-Fvb5-4-augustus-gene-57.50	PREDICTED: short-chain dehydrogenase TIC 32, chloroplastic isoform X1 [Fragaria vesca subsp. vesca]	-1.83506	0.0016054	0.00474775	yes	down		maker-Fvb1-2-augustus-gene-92.36	PREDICTED: oxygen-evolving enhancer protein 1, chloroplastic [Fragaria vesca subsp. vesca]	1.37767	3.23407e-174	5.14842e-172	yes	up
augustus_masked-Fvb1-2-processed-gene-54.19	PREDICTED: dirigent protein 23-like [Fragaria vesca subsp. vesca]	-1.29842	0.000588877	0.00188978	yes	down		maker-Fvb6-2-snap-gene-194.51	PREDICTED: uncharacterized protein LOC101294772 [Fragaria vesca subsp. vesca]	2.52496	2.15949e-178	3.57604e-176	yes	up
MSTRG.58818	PREDICTED: common plant regulatory factor 1-like [Fragaria vesca subsp. vesca]	-4.71972	2.29e-230	6.00536e-228	yes	down		maker-Fvb1-3-snap-gene-59.54	PREDICTED: LOW QUALITY PROTEIN: DNA-directed RNA polymerase II subunit 1 [Fragaria vesca subsp. vesca]	1.64949	0.0109175	0.0269334	yes	up
maker-Fvb6-2-snap-gene-179.32	PREDICTED: E3 ubiquitin-protein ligase MBR2 [Fragaria vesca subsp. vesca]	-1.60779	9.14e-240	2.55415e-237	yes	down		maker-Fvb1-4-augustus-gene-118.35	PREDICTED: annexin D1-like [Fragaria vesca subsp. vesca]	1.08596	5.1968e-49	1.52736e-47	yes	up
MSTRG.5520	PREDICTED: replication factor C subunit 3 [Fragaria vesca subsp. vesca]	-1.39256	2.12e-05	8.49955e-05	yes	down		maker-Fvb3-3-augustus-gene-67.33	PREDICTED: zingipain-2-like [Fragaria vesca subsp. vesca]	6.95726	5.54614e-87	3.15959e-85	yes	up
maker-Fvb1-2-snap-gene-10.84	PREDICTED: K(+) efflux antiporter 4-like [Fragaria vesca subsp. vesca]	-1.42524	1.03e-14	9.35216e-14	yes	down		snap_masked-Fvb3-1-processed-gene-233.14	PREDICTED: probable potassium transporter 13 isoform X1 [Fragaria vesca subsp. vesca]	1.84622	9.6707e-76	4.60801e-74	yes	up
maker-Fvb1-4-augustus-gene-69.45	PREDICTED: probable vacuolar amino acid transporter YPQ2 isoform X2 [Fragaria vesca subsp. vesca]	-1.75276	2.04e-54	6.69651e-53	yes	down		snap_masked-Fvb4-2-processed-gene-91.17	PREDICTED: RING-H2 finger protein ATL2 [Fragaria vesca subsp. vesca]	3.74142	1.73265e-09	1.08582e-08	yes	up
maker-Fvb2-4-snap-gene-261.102	PREDICTED: probable 1-acyl-sn-glycerol-3-phosphate acyltransferase 4 isoform X2 [Fragaria vesca subsp. vesca]	-1.84914	1.65e-15	1.56877e-14	yes	down		maker-Fvb6-3-snap-gene-412.67	PREDICTED: coiled-coil domain-containing protein SCD2-like isoform X3 [Fragaria vesca subsp. vesca]	1.01118	1.12368e-33	2.21558e-32	yes	up
maker-Fvb7-4-snap-gene-98.44	cytochrome P450 CYP82D47-like isoform X1 [Rosa chinensis]	-1.33641	0.00944649	0.0236831	yes	down		augustus_masked-Fvb5-2-processed-gene-23.12	PREDICTED: uncharacterized protein LOC105351806 [Fragaria vesca subsp. vesca]	3.21185	6.85286e-06	2.93064e-05	yes	up
maker-Fvb2-2-snap-gene-205.37	PREDICTED: thioredoxin-related transmembrane protein 2 [Fragaria vesca subsp. vesca]	-4.33144	1.08e-14	9.78504e-14	yes	down		maker-Fvb7-3-augustus-gene-125.36	PREDICTED: uncharacterized protein LOC101294980 isoform X1 [Fragaria vesca subsp. vesca]	1.13351	6.1499e-09	3.67093e-08	yes	up
maker-Fvb5-1-augustus-gene-193.32	PREDICTED: alpha/beta hydrolase domain-containing protein 17B [Fragaria vesca subsp. vesca]	-1.83998	1.56e-07	8.06107e-07	yes	down		augustus_masked-Fvb4-1-processed-gene-157.4	PREDICTED: nudix hydrolase 1-like [Fragaria vesca subsp. vesca]	2.27292	1.0265e-08	6.00343e-08	yes	up
maker-Fvb5-4-augustus-gene-165.37	floral homeotic protein APETALA 2-like isoform X1 [Rosa chinensis]	-1.01482	5.98e-13	4.85064e-12	yes	down		augustus_masked-Fvb5-1-processed-gene-276.3	PREDICTED: uncharacterized protein LOC105351563 [Fragaria vesca subsp. vesca]	1.65769	2.30596e-07	1.17057e-06	yes	up
maker-Fvb7-2-snap-gene-317.82	PREDICTED: protein TRANSPARENT TESTA 12-like [Fragaria vesca subsp. vesca]	-1.12865	3.27e-60	1.19702e-58	yes	down		MSTRG.61908	PREDICTED: cytochrome P450 CYP82D47-like [Fragaria vesca subsp. vesca]	4.72936	3.48455e-296	1.33179e-293	yes	up
maker-Fvb3-2-augustus-gene-53.35	PREDICTED: GDP-L-galactose phosphorylase 1-like isoform X1 [Fragaria vesca subsp. vesca]	-1.54917	2.5e-152	3.10707e-150	yes	down		maker-Fvb5-3-augustus-gene-198.42	PREDICTED: floral homeotic protein FBP1 [Fragaria vesca subsp. vesca]	1.25244	1.01185e-142	1.14282e-140	yes	up
maker-Fvb6-3-augustus-gene-435.73	hypothetical protein RchiOBHm_Chr3g0461831 [Rosa chinensis]	-2.32772	3.67e-11	2.61968e-10	yes	down		augustus_masked-Fvb6-3-processed-gene-24.10	PREDICTED: probable zinc transporter protein DDB_G0291141 [Fragaria vesca subsp. vesca]	1.04725	5.00469e-06	2.17926e-05	yes	up
snap_masked-Fvb6-3-processed-gene-12.27	PREDICTED: ribulose-1,5 bisphosphate carboxylase/oxygenase large subunit N-methyltransferase, chloroplastic [Fragaria vesca subsp. vesca]	-1.45624	2.15e-74	9.9784e-73	yes	down		maker-Fvb2-4-augustus-gene-91.30	PREDICTED: cytochrome P450 71A4-like [Fragaria vesca subsp. vesca]	1.0502	0.00595376	0.0156137	yes	up
maker-Fvb6-1-augustus-gene-231.28	PREDICTED: WD repeat-containing protein LWD1-like [Fragaria vesca subsp. vesca]	-2.30276	2.93e-06	1.31038e-05	yes	down		maker-Fvb6-3-augustus-gene-126.44	PREDICTED: uncharacterized protein LOC101301403 [Fragaria vesca subsp. vesca]	1.87885	3.51439e-42	8.85007e-41	yes	up
augustus_masked-Fvb5-1-processed-gene-245.11	PREDICTED: pentatricopeptide repeat-containing protein At1g71490 [Fragaria vesca subsp. vesca]	-1.11126	7.25e-07	3.48509e-06	yes	down		maker-Fvb5-1-augustus-gene-73.39	PREDICTED: mavicyanin [Fragaria vesca subsp. vesca]	1.78925	1.08209e-06	5.10797e-06	yes	up
snap_masked-Fvb6-2-processed-gene-207.9	PREDICTED: probable pyridoxal 5&apos;-phosphate synthase subunit PDX1 [Fragaria vesca subsp. vesca]	-1.78887	2.25e-14	1.99663e-13	yes	down		maker-Fvb5-4-snap-gene-31.41	PREDICTED: probable boron transporter 2 [Fragaria vesca subsp. vesca]	1.28681	9.19665e-07	4.37706e-06	yes	up
MSTRG.54	PREDICTED: ALA-interacting subunit 3-like [Fragaria vesca subsp. vesca]	-1.10139	1.4e-26	2.19554e-25	yes	down		MSTRG.8264	uncharacterized protein LOC112172658 isoform X1 [Rosa chinensis]	1.55036	2.69677e-10	1.79959e-09	yes	up
maker-Fvb6-3-augustus-gene-273.47	PREDICTED: monodehydroascorbate reductase, seedling isozyme [Fragaria vesca subsp. vesca]	-1.54464	3.93e-192	7.4138e-190	yes	down		augustus_masked-Fvb5-3-processed-gene-179.8	PREDICTED: mitogen-activated protein kinase kinase 9-like [Fragaria vesca subsp. vesca]	1.37599	5.69651e-13	4.62859e-12	yes	up
maker-Fvb6-2-snap-gene-95.35	PREDICTED: uncharacterized protein LOC101314295 [Fragaria vesca subsp. vesca]	-1.17965	0.000190084	0.00066129	yes	down		maker-Fvb6-1-augustus-gene-110.47	PREDICTED: pectinesterase-like [Fragaria vesca subsp. vesca]	1.47051	4.44804e-10	2.91899e-09	yes	up
maker-Fvb2-4-augustus-gene-230.47	PREDICTED: interferon-related developmental regulator 1 [Fragaria vesca subsp. vesca]	-1.09585	7.25e-81	3.73512e-79	yes	down		MSTRG.51896	PREDICTED: B-box zinc finger protein 32-like [Fragaria vesca subsp. vesca]	1.31296	1.71483e-07	8.84168e-07	yes	up
MSTRG.37929	PREDICTED: short-chain dehydrogenase/reductase 2b-like [Fragaria vesca subsp. vesca]	-1.48508	5.88e-20	6.98819e-19	yes	down		augustus_masked-Fvb6-3-processed-gene-113.9	PREDICTED: auxin-binding protein ABP19a [Fragaria vesca subsp. vesca]	1.55981	3.48874e-136	3.66605e-134	yes	up
maker-Fvb1-4-snap-gene-110.18	PREDICTED: protein TRANSPARENT TESTA 12-like [Fragaria vesca subsp. vesca]	-1.55514	2.31e-19	2.66699e-18	yes	down		snap_masked-Fvb1-4-processed-gene-224.15	PREDICTED: uncharacterized protein LOC101314217 [Fragaria vesca subsp. vesca]	1.09767	1.11073e-09	7.06736e-09	yes	up
augustus_masked-Fvb1-2-processed-gene-118.3	thioredoxin-like protein AAED1, chloroplastic isoform X3 [Rosa chinensis]	-1.40338	1.89e-45	5.13042e-44	yes	down		snap_masked-Fvb2-1-processed-gene-238.20	PREDICTED: F-box protein AFR [Fragaria vesca subsp. vesca]	1.02004	6.2088e-11	4.3499e-10	yes	up
MSTRG.28067	PREDICTED: probable ran guanine nucleotide release factor [Fragaria vesca subsp. vesca]	-1.18506	6.42e-08	3.4573e-07	yes	down		maker-Fvb7-1-augustus-gene-239.55	PREDICTED: putative serine/threonine-protein kinase [Fragaria vesca subsp. vesca]	2.99642	0.00406988	0.0111062	yes	up
maker-Fvb1-2-augustus-gene-39.57	PREDICTED: uncharacterized protein LOC101305100 [Fragaria vesca subsp. vesca]	-2.27545	1.38e-33	2.71933e-32	yes	down		augustus_masked-Fvb5-1-processed-gene-251.0	PREDICTED: extra-large guanine nucleotide-binding protein 1 [Fragaria vesca subsp. vesca]	1.68259	0.0084961	0.0215335	yes	up
maker-Fvb7-1-augustus-gene-295.55	PREDICTED: starch synthase 1, chloroplastic/amyloplastic [Fragaria vesca subsp. vesca]	-1.01059	1.4e-72	6.36014e-71	yes	down		maker-Fvb6-4-augustus-gene-319.35	PREDICTED: myb-related protein Myb4-like [Fragaria vesca subsp. vesca]	2.92201	0.00101017	0.00310492	yes	up
augustus_masked-Fvb6-1-processed-gene-206.0	PREDICTED: uncharacterized protein LOC101295551 [Fragaria vesca subsp. vesca]	-1.34757	1.18e-10	8.05962e-10	yes	down		augustus_masked-Fvb6-4-processed-gene-140.11	PREDICTED: transcription repressor OFP6 [Fragaria vesca subsp. vesca]	3.63473	2.13767e-37	4.72966e-36	yes	up
augustus_masked-Fvb7-1-processed-gene-162.10	PREDICTED: transcription factor TCP9 [Fragaria vesca subsp. vesca]	-2.32048	5.32e-10	3.46799e-09	yes	down		maker-Fvb6-4-snap-gene-68.54	putative F-box domain, leucine-rich repeat domain, L domain-containing protein [Rosa chinensis]	1.10464	0.000674472	0.00214028	yes	up
maker-Fvb7-3-augustus-gene-45.64	PREDICTED: acid phosphatase 1 [Fragaria vesca subsp. vesca]	-1.02941	0.00875438	0.0221225	yes	down		maker-Fvb3-2-augustus-gene-98.54	PREDICTED: protein Jade-1-like [Fragaria vesca subsp. vesca]	2.7598	1.07769e-13	9.19193e-13	yes	up
maker-Fvb4-1-augustus-gene-185.40	PREDICTED: adagio protein 3 [Fragaria vesca subsp. vesca]	-4.02468	0	0	yes	down		MSTRG.44508	PREDICTED: G-type lectin S-receptor-like serine/threonine-protein kinase At4g03230 isoform X4 [Fragaria vesca subsp. vesca]	2.76309	7.43923e-07	3.57235e-06	yes	up
maker-Fvb4-4-snap-gene-59.52	PREDICTED: ABC transporter B family member 26, chloroplastic [Fragaria vesca subsp. vesca]	-2.22419	6.49e-219	1.49591e-216	yes	down		maker-Fvb6-2-augustus-gene-16.34	PREDICTED: ethylene-responsive transcription factor RAP2-12-like [Fragaria vesca subsp. vesca]	1.00382	3.06754e-89	1.8149e-87	yes	up
maker-Fvb2-2-augustus-gene-93.38	PREDICTED: dCTP pyrophosphatase 1-like [Fragaria vesca subsp. vesca]	-1.175	5.35e-06	2.32101e-05	yes	down		maker-Fvb7-2-augustus-gene-319.44	PREDICTED: probable WRKY transcription factor 41 [Fragaria vesca subsp. vesca]	1.47549	5.05028e-05	0.000191421	yes	up
MSTRG.53136	putative Ulp1 peptidase [Rosa chinensis]	-1.24366	4.17e-05	0.000160014	yes	down		maker-Fvb5-3-snap-gene-184.51	PREDICTED: beta-glucosidase 44-like [Fragaria vesca subsp. vesca]	1.39825	4.17621e-58	1.48115e-56	yes	up
maker-Fvb2-4-snap-gene-74.43	PREDICTED: probable DNA helicase MCM9 [Fragaria vesca subsp. vesca]	-1.12741	3.6e-15	3.35234e-14	yes	down		maker-Fvb6-1-augustus-gene-354.43	PREDICTED: cytochrome P450 714C2-like [Fragaria vesca subsp. vesca]	1.43218	1.46262e-09	9.22283e-09	yes	up
maker-Fvb2-2-augustus-gene-9.41	hypothetical protein PRUPE_3G246600 [Prunus persica]	-1.96792	8.11e-14	6.97039e-13	yes	down		augustus_masked-Fvb3-3-processed-gene-44.10	PREDICTED: alpha-glucosidase-like [Fragaria vesca subsp. vesca]	1.47176	1.53994e-40	3.71575e-39	yes	up
maker-Fvb7-3-augustus-gene-32.66	PREDICTED: low-temperature-induced 65 kDa protein isoform X6 [Fragaria vesca subsp. vesca]	-7.39654	1.29e-14	1.15636e-13	yes	down		MSTRG.44820	PREDICTED: GDSL esterase/lipase At3g27950 [Fragaria vesca subsp. vesca]	1.17591	2.17138e-08	1.22936e-07	yes	up
maker-Fvb7-3-augustus-gene-1.52	PREDICTED: beta-carotene hydroxylase 2, chloroplastic-like [Fragaria vesca subsp. vesca]	-2.55659	9.17e-276	3.11258e-273	yes	down		maker-Fvb7-2-augustus-gene-204.40	PREDICTED: WAT1-related protein At5g40240-like isoform X1 [Fragaria vesca subsp. vesca]	3.29269	6.6342e-18	7.15226e-17	yes	up
maker-Fvb7-1-augustus-gene-279.56	PREDICTED: LOW QUALITY PROTEIN: pentatricopeptide repeat-containing protein At4g25270, chloroplastic [Fragaria vesca subsp. vesca]	-2.06804	0.000102545	0.000371307	yes	down		augustus_masked-Fvb3-4-processed-gene-226.12	PREDICTED: 18.1 kDa class I heat shock protein-like [Fragaria vesca subsp. vesca]	5.89786	6.24996e-07	3.02419e-06	yes	up
maker-Fvb1-4-augustus-gene-123.39	PREDICTED: protein NEN4 [Fragaria vesca subsp. vesca]	-2.03957	6.06e-06	2.61111e-05	yes	down		augustus_masked-Fvb5-4-processed-gene-55.4	PREDICTED: uncharacterized protein LOC101293650 [Fragaria vesca subsp. vesca]	4.31681	1.08704e-23	1.52022e-22	yes	up
maker-Fvb4-2-snap-gene-143.31	PREDICTED: 15-cis-zeta-carotene isomerase, chloroplastic [Fragaria vesca subsp. vesca]	-1.14797	3.1e-25	4.60269e-24	yes	down		maker-Fvb2-1-snap-gene-260.70	PREDICTED: cytochrome P450 CYP82D47-like [Fragaria vesca subsp. vesca]	1.55987	1.20473e-37	2.6832e-36	yes	up
MSTRG.43120	PREDICTED: G-type lectin S-receptor-like serine/threonine-protein kinase B120 [Fragaria vesca subsp. vesca]	-1.40886	6.57e-23	8.88921e-22	yes	down		maker-Fvb3-1-augustus-gene-265.35	PREDICTED: small RNA 2&apos;-O-methyltransferase-like [Fragaria vesca subsp. vesca]	3.22796	0.00339368	0.00940906	yes	up
MSTRG.35657	PREDICTED: UPF0481 protein At3g47200-like [Fragaria vesca subsp. vesca]	-1.58338	7.43e-05	0.000274904	yes	down		maker-Fvb6-3-augustus-gene-424.50	PREDICTED: uncharacterized protein LOC101302665 [Fragaria vesca subsp. vesca]	1.08297	0.000413829	0.00136294	yes	up
maker-Fvb6-3-augustus-gene-435.59	PREDICTED: uncharacterized protein LOC101313427 [Fragaria vesca subsp. vesca]	-1.15706	0.0083196	0.0211358	yes	down		augustus_masked-Fvb7-2-processed-gene-207.13	PREDICTED: uncharacterized protein LOC101306672 [Fragaria vesca subsp. vesca]	2.21912	2.64521e-80	1.34762e-78	yes	up
maker-Fvb2-2-augustus-gene-161.22	PREDICTED: uncharacterized protein LOC101295094 [Fragaria vesca subsp. vesca]	-1.01043	1.33e-53	4.30432e-52	yes	down		maker-Fvb3-1-augustus-gene-21.50	PREDICTED: LOW QUALITY PROTEIN: oligopeptide transporter 1-like [Fragaria vesca subsp. vesca]	1.59339	0.00114457	0.00347931	yes	up
MSTRG.65586	proline-rich receptor-like protein kinase PERK10 [Rosa chinensis]	-2.56405	7.43e-155	9.48808e-153	yes	down		augustus_masked-Fvb5-1-processed-gene-194.12	PREDICTED: 4-coumarate--CoA ligase-like 5 [Fragaria vesca subsp. vesca]	2.31503	0.0122058	0.0297288	yes	up
maker-Fvb6-1-augustus-gene-149.25	PREDICTED: ADP,ATP carrier protein 1, chloroplastic [Fragaria vesca subsp. vesca]	-1.00412	1.48e-67	6.18773e-66	yes	down		MSTRG.30591	--	1.19346	8.6822e-07	4.14506e-06	yes	up
maker-Fvb4-3-snap-gene-24.74	PREDICTED: uncharacterized protein LOC101294845 [Fragaria vesca subsp. vesca]	-1.48565	2.24e-175	3.60804e-173	yes	down		maker-Fvb7-2-augustus-gene-36.14	PREDICTED: uncharacterized protein LOC101309290 isoform X1 [Fragaria vesca subsp. vesca]	1.27616	5.25969e-75	2.4711e-73	yes	up
maker-Fvb1-1-augustus-gene-238.48	PREDICTED: myb-related protein Hv1 [Fragaria vesca subsp. vesca]	-2.04184	0.000762858	0.00239874	yes	down		MSTRG.11784	PREDICTED: protein TPX2 isoform X2 [Fragaria vesca subsp. vesca]	1.8083	0.0206428	0.0473691	yes	up
snap_masked-Fvb4-4-processed-gene-3.16	PREDICTED: uncharacterized protein LOC101312533 [Fragaria vesca subsp. vesca]	-1.22964	1.91e-110	1.49428e-108	yes	down		maker-Fvb5-1-augustus-gene-106.34	PREDICTED: ras-related protein RABA6b [Fragaria vesca subsp. vesca]	1.16444	2.52159e-07	1.27396e-06	yes	up
maker-Fvb6-3-augustus-gene-377.32	PREDICTED: phospholipase D p1 [Fragaria vesca subsp. vesca]	-1.73081	0.0199137	0.0459019	yes	down		maker-Fvb7-1-augustus-gene-129.26	PREDICTED: probable mediator of RNA polymerase II transcription subunit 37c [Fragaria vesca subsp. vesca]	1.19804	1.99458e-39	4.68424e-38	yes	up
maker-Fvb1-2-augustus-gene-89.37	PREDICTED: F-box protein CPR30-like [Fragaria vesca subsp. vesca]	-1.00523	0.0172747	0.0404895	yes	down		augustus_masked-Fvb1-3-processed-gene-75.11	PREDICTED: scarecrow-like protein 4 [Fragaria vesca subsp. vesca]	1.21239	1.13029e-18	1.26712e-17	yes	up
maker-Fvb4-2-augustus-gene-57.37	pleiotropic drug resistance protein 2-like [Rosa chinensis]	-2.05604	0.00209929	0.00607254	yes	down		snap_masked-Fvb6-4-processed-gene-208.18	PREDICTED: phospholipase A1-IIdelta [Fragaria vesca subsp. vesca]	1.17052	9.2775e-21	1.14491e-19	yes	up
maker-Fvb4-3-augustus-gene-295.39	PREDICTED: kaempferol 3-O-beta-D-galactosyltransferase-like [Fragaria vesca subsp. vesca]	-4.20092	0	0	yes	down		maker-Fvb2-3-augustus-gene-85.25	PREDICTED: BTB/POZ domain-containing protein At1g03010 isoform X1 [Fragaria vesca subsp. vesca]	1.2614	0.000143192	0.000507353	yes	up
augustus_masked-Fvb5-3-processed-gene-159.4	receptor-like protein EIX1 [Rosa chinensis]	-2.24495	2.67e-55	8.94061e-54	yes	down		augustus_masked-Fvb4-3-processed-gene-127.8	PREDICTED: major allergen Pru av 1-like [Fragaria vesca subsp. vesca]	2.95196	1.38041e-100	9.55222e-99	yes	up
snap_masked-Fvb1-1-processed-gene-201.25	putative 3-oxolaurate decarboxylase [Rosa chinensis]	-1.14733	4.07e-19	4.65418e-18	yes	down		maker-Fvb1-2-augustus-gene-16.54	PREDICTED: probable glycosyltransferase At3g07620 [Fragaria vesca subsp. vesca]	1.2204	5.38312e-12	4.07665e-11	yes	up
maker-Fvb7-1-augustus-gene-176.35	PREDICTED: E3 ubiquitin-protein ligase At3g02290 [Fragaria vesca subsp. vesca]	-1.46806	9.52e-10	6.08775e-09	yes	down		augustus_masked-Fvb5-2-processed-gene-64.7	putative powdery mildew resistance protein, RPW8 [Rosa chinensis]	2.26341	2.79589e-06	1.25548e-05	yes	up
augustus_masked-Fvb4-3-processed-gene-300.3	PREDICTED: serine/threonine-protein kinase BLUS1 [Fragaria vesca subsp. vesca]	-1.22933	1.25e-05	5.16175e-05	yes	down		maker-Fvb3-2-augustus-gene-85.24	PREDICTED: transcription factor JUNGBRUNNEN 1 [Fragaria vesca subsp. vesca]	2.17025	0.000182134	0.000635341	yes	up
maker-Fvb4-1-snap-gene-136.57	PREDICTED: uncharacterized protein LOC101315017 [Fragaria vesca subsp. vesca]	-1.4388	0.0054091	0.0143281	yes	down		maker-Fvb6-2-snap-gene-269.85	PREDICTED: uncharacterized protein LOC101312646 [Fragaria vesca subsp. vesca]	1.3922	2.62462e-06	1.18173e-05	yes	up
maker-Fvb5-4-snap-gene-219.42	PREDICTED: rho GTPase-activating protein REN1 [Fragaria vesca subsp. vesca]	-1.27753	0.0120096	0.0293076	yes	down		maker-Fvb1-4-augustus-gene-95.52	PREDICTED: transcription factor RAX3 [Fragaria vesca subsp. vesca]	1.9263	0.00962351	0.0240776	yes	up
augustus_masked-Fvb5-2-processed-gene-92.3	PREDICTED: uncharacterized protein At5g50100, mitochondrial [Fragaria vesca subsp. vesca]	-1.16844	2.53e-76	1.21704e-74	yes	down		snap_masked-Fvb4-1-processed-gene-140.26	PREDICTED: protein TRANSPARENT TESTA 12-like [Fragaria vesca subsp. vesca]	1.10692	0.0153609	0.0364816	yes	up
MSTRG.9972	PREDICTED: DNA cross-link repair protein SNM1 isoform X1 [Fragaria vesca subsp. vesca]	-1.06972	1.01e-09	6.47496e-09	yes	down		maker-Fvb3-2-augustus-gene-167.28	PREDICTED: NAC domain-containing protein 90 [Fragaria vesca subsp. vesca]	3.23577	1.00594e-09	6.42678e-09	yes	up
augustus_masked-Fvb5-4-processed-gene-46.7	PREDICTED: transcription factor ICE1 [Fragaria vesca subsp. vesca]	-1.2332	7.06e-33	1.35773e-31	yes	down		snap_masked-Fvb6-1-processed-gene-341.34	PREDICTED: receptor-like protein 12 isoform X3 [Fragaria vesca subsp. vesca]	1.17622	4.69018e-87	2.68208e-85	yes	up
maker-Fvb2-1-augustus-gene-5.65	PREDICTED: cleavage and polyadenylation specificity factor subunit 6 [Fragaria vesca subsp. vesca]	-2.54273	6.88e-07	3.31183e-06	yes	down		maker-Fvb2-4-augustus-gene-231.51	PREDICTED: peamaclein [Fragaria vesca subsp. vesca]	2.1462	7.94705e-91	4.81828e-89	yes	up
maker-Fvb3-3-augustus-gene-42.40	PREDICTED: uncharacterized oxidoreductase C663.09c [Fragaria vesca subsp. vesca]	-1.74237	1.92e-72	8.70489e-71	yes	down		maker-Fvb2-2-augustus-gene-186.34	PREDICTED: probable inactive shikimate kinase like 2, chloroplastic [Fragaria vesca subsp. vesca]	1.80564	0.000109767	0.000395875	yes	up
maker-Fvb6-4-augustus-gene-298.47	PREDICTED: uncharacterized aarF domain-containing protein kinase At1g79600, chloroplastic [Fragaria vesca subsp. vesca]	-1.74155	1.37e-297	5.3265e-295	yes	down		snap_masked-Fvb5-1-processed-gene-172.33	putative galactose oxidase, beta-propeller [Rosa chinensis]	1.88371	1.58453e-05	6.43481e-05	yes	up
maker-Fvb6-2-snap-gene-135.48	PREDICTED: ABC transporter G family member 22 isoform X2 [Fragaria vesca subsp. vesca]	-1.75257	7.05e-276	2.40057e-273	yes	down		maker-Fvb1-3-augustus-gene-7.59	PREDICTED: two-component response regulator ARR12 [Fragaria vesca subsp. vesca]	1.15755	1.94818e-06	8.90803e-06	yes	up
maker-Fvb6-3-augustus-gene-183.23	PREDICTED: uncharacterized protein LOC101292722 [Fragaria vesca subsp. vesca]	-1.2525	3.26e-14	2.86699e-13	yes	down		augustus_masked-Fvb1-1-processed-gene-188.7	PREDICTED: oxygen-evolving enhancer protein 1, chloroplastic [Fragaria vesca subsp. vesca]	1.13869	3.11194e-130	2.99238e-128	yes	up
maker-Fvb7-1-augustus-gene-211.41	PREDICTED: probable pectate lyase 13 [Fragaria vesca subsp. vesca]	-1.50731	6.25e-06	2.68583e-05	yes	down		maker-Fvb6-4-snap-gene-62.49	PREDICTED: uncharacterized protein LOC101311974 isoform X4 [Fragaria vesca subsp. vesca]	1.3338	0.0100791	0.0250803	yes	up
augustus_masked-Fvb5-1-processed-gene-8.2	PREDICTED: transcription factor TCP9-like [Fragaria vesca subsp. vesca]	-1.02743	9.55e-09	5.59907e-08	yes	down		augustus_masked-Fvb3-3-processed-gene-225.8	PREDICTED: exocyst complex component EXO70A1-like [Fragaria vesca subsp. vesca]	3.27322	9.03457e-26	1.36827e-24	yes	up
MSTRG.4234	PREDICTED: heptahelical transmembrane protein 1 isoform X1 [Fragaria vesca subsp. vesca]	-1.01115	1.04e-29	1.82235e-28	yes	down		maker-Fvb2-4-snap-gene-9.57	putative small auxin-up RNA [Rosa chinensis]	2.71297	0.000546303	0.00176273	yes	up
augustus_masked-Fvb3-4-processed-gene-115.1	PREDICTED: protein TIC 20-v, chloroplastic [Fragaria vesca subsp. vesca]	-1.14968	1.4e-15	1.33478e-14	yes	down		augustus_masked-Fvb1-4-processed-gene-10.16	PREDICTED: DELLA protein GAI-like [Fragaria vesca subsp. vesca]	1.07968	8.82299e-22	1.13845e-20	yes	up
maker-Fvb6-1-augustus-gene-24.54	PREDICTED: actin-related protein 4-like [Fragaria vesca subsp. vesca]	-1.92064	2.98e-10	1.98064e-09	yes	down		MSTRG.52178	PREDICTED: xyloglucan endotransglucosylase/hydrolase 2-like [Fragaria vesca subsp. vesca]	2.4546	2.60942e-10	1.744e-09	yes	up
MSTRG.35959	PREDICTED: mitochondrial import receptor subunit TOM5 homolog [Fragaria vesca subsp. vesca]	-1.05541	1.79e-10	1.21249e-09	yes	down		maker-Fvb7-1-snap-gene-77.32	PREDICTED: RNA polymerase II C-terminal domain phosphatase-like 4 [Fragaria vesca subsp. vesca]	3.91066	0.00804798	0.0205148	yes	up
maker-Fvb4-4-augustus-gene-65.56	putative ABC transporter C family member 15 [Rosa chinensis]	-2.15834	1.27e-08	7.35257e-08	yes	down		augustus_masked-Fvb5-2-processed-gene-101.10	PREDICTED: mitogen-activated protein kinase kinase 9-like [Fragaria vesca subsp. vesca]	1.66462	4.78046e-18	5.18337e-17	yes	up
maker-Fvb6-1-augustus-gene-332.52	PREDICTED: root phototropism protein 3-like [Fragaria vesca subsp. vesca]	-2.46165	6.56e-187	1.18115e-184	yes	down		maker-Fvb3-1-snap-gene-282.68	PREDICTED: probable LRR receptor-like serine/threonine-protein kinase At1g07650 [Fragaria vesca subsp. vesca]	2.78568	5.87151e-127	5.48296e-125	yes	up
maker-Fvb3-3-snap-gene-251.60	PREDICTED: protein DAMAGED DNA-BINDING 2 [Fragaria vesca subsp. vesca]	-3.09931	2.31e-09	1.42858e-08	yes	down		maker-Fvb2-2-snap-gene-19.64	PREDICTED: endonuclease V isoform X2 [Fragaria vesca subsp. vesca]	4.59264	0.00927662	0.0232966	yes	up
maker-Fvb3-2-augustus-gene-73.18	PREDICTED: CTP synthase-like [Fragaria vesca subsp. vesca]	-1.24715	8.09e-46	2.22042e-44	yes	down		augustus_masked-Fvb2-3-processed-gene-47.18	PREDICTED: probable sarcosine oxidase [Fragaria vesca subsp. vesca]	3.24568	1.01537e-100	7.03162e-99	yes	up
maker-Fvb3-2-augustus-gene-195.28	PREDICTED: peptide methionine sulfoxide reductase B1, chloroplastic [Fragaria vesca subsp. vesca]	-1.16344	0.000465377	0.00151941	yes	down		augustus_masked-Fvb2-4-processed-gene-224.8	PREDICTED: uncharacterized protein ycf36 [Fragaria vesca subsp. vesca]	1.28562	1.93342e-37	4.28194e-36	yes	up
maker-Fvb6-4-augustus-gene-11.45	PREDICTED: E3 ubiquitin-protein ligase RGLG2 [Fragaria vesca subsp. vesca]	-1.57955	4.76e-12	3.61856e-11	yes	down		maker-Fvb6-1-augustus-gene-187.27	PREDICTED: uncharacterized protein LOC101306071 [Fragaria vesca subsp. vesca]	1.24154	4.47301e-07	2.20022e-06	yes	up
maker-Fvb7-1-snap-gene-210.57	PREDICTED: ras-related protein RABC2a-like [Fragaria vesca subsp. vesca]	-1.91449	3.92e-12	2.99492e-11	yes	down		augustus_masked-Fvb3-2-processed-gene-307.17	PREDICTED: F-box/kelch-repeat protein At2g44130-like [Fragaria vesca subsp. vesca]	2.31242	1.325e-05	5.44185e-05	yes	up
maker-Fvb2-1-snap-gene-69.38	PREDICTED: putative laccase-9 [Fragaria vesca subsp. vesca]	-1.38555	6.73e-12	5.0496e-11	yes	down		maker-Fvb4-4-augustus-gene-255.36	PREDICTED: alternative oxidase 3, mitochondrial-like [Fragaria vesca subsp. vesca]	2.40762	2.07035e-24	2.9739e-23	yes	up
maker-Fvb4-3-augustus-gene-24.65	PREDICTED: MLP-like protein 328 [Fragaria vesca subsp. vesca]	-2.21483	9.14e-13	7.32835e-12	yes	down		maker-Fvb7-3-snap-gene-42.59	PREDICTED: cyclin-dependent kinase F-4-like [Fragaria vesca subsp. vesca]	2.7367	0.0192508	0.0445428	yes	up
maker-Fvb2-2-augustus-gene-41.39	PREDICTED: protein TRANSPARENT TESTA 12-like [Fragaria vesca subsp. vesca]	-2.42662	4.84e-69	2.08277e-67	yes	down		maker-Fvb5-3-augustus-gene-62.35	PREDICTED: 12-oxophytodienoate reductase 1-like [Fragaria vesca subsp. vesca]	1.11793	6.14575e-23	8.32494e-22	yes	up
maker-Fvb4-2-snap-gene-10.67	PREDICTED: DEAD-box ATP-dependent RNA helicase ISE2, chloroplastic [Fragaria vesca subsp. vesca]	-1.16843	7.9e-38	1.76865e-36	yes	down		maker-Fvb7-1-snap-gene-203.43	PREDICTED: uncharacterized protein LOC101307620 [Fragaria vesca subsp. vesca]	1.63617	5.83893e-08	3.15533e-07	yes	up
maker-Fvb6-3-augustus-gene-8.34	PREDICTED: glycerophosphodiester phosphodiesterase GDPD1, chloroplastic-like [Fragaria vesca subsp. vesca]	-1.81563	4.58e-89	2.70375e-87	yes	down		augustus_masked-Fvb3-1-processed-gene-268.1	PREDICTED: uncharacterized protein LOC101314349 [Fragaria vesca subsp. vesca]	2.97744	0.0176798	0.0413224	yes	up
maker-Fvb4-1-snap-gene-145.63	PREDICTED: origin of replication complex subunit 4 [Fragaria vesca subsp. vesca]	-3.13953	0.000463635	0.0015141	yes	down		maker-Fvb5-3-augustus-gene-189.62	PREDICTED: uncharacterized protein LOC101304878 [Fragaria vesca subsp. vesca]	1.10935	1.78611e-05	7.21075e-05	yes	up
MSTRG.29920	PREDICTED: uncharacterized protein LOC101310825 [Fragaria vesca subsp. vesca]	-1.17982	2.52e-31	4.61949e-30	yes	down		maker-Fvb3-4-augustus-gene-106.46	PREDICTED: disease resistance protein At4g27190-like [Fragaria vesca subsp. vesca]	2.52852	3.72535e-45	1.0049e-43	yes	up
maker-Fvb5-1-snap-gene-12.58	PREDICTED: uncharacterized protein LOC101313699 isoform X1 [Fragaria vesca subsp. vesca]	-3.65964	0	0	yes	down		maker-Fvb5-1-snap-gene-146.33	putative small auxin-up RNA [Rosa chinensis]	2.21032	1.11515e-05	4.62695e-05	yes	up
maker-Fvb5-1-augustus-gene-19.108	PREDICTED: probable membrane-associated kinase regulator 2 [Fragaria vesca subsp. vesca]	-1.62831	0.000843069	0.00262914	yes	down		augustus_masked-Fvb5-4-processed-gene-17.3	uncharacterized protein LOC112177456 [Rosa chinensis]	1.47094	2.56717e-09	1.58512e-08	yes	up
maker-Fvb2-4-augustus-gene-193.36	PREDICTED: LOW QUALITY PROTEIN: flavonol synthase/flavanone 3-hydroxylase-like [Fragaria vesca subsp. vesca]	-1.70561	3.56e-07	1.76748e-06	yes	down		maker-Fvb4-4-augustus-gene-135.31	uncharacterized protein LOC112197846 [Rosa chinensis]	4.33006	1.79769e-09	1.12464e-08	yes	up
snap_masked-Fvb2-3-processed-gene-43.26	PREDICTED: putative tRNA pseudouridine synthase Pus10 [Fragaria vesca subsp. vesca]	-1.08828	1.35e-09	8.5376e-09	yes	down		maker-Fvb3-1-snap-gene-108.49	PREDICTED: glycerophosphodiester phosphodiesterase GDPDL3-like [Fragaria vesca subsp. vesca]	1.27561	6.03632e-45	1.6172e-43	yes	up
augustus_masked-Fvb3-3-processed-gene-75.1	PREDICTED: galactomannan galactosyltransferase 1-like [Fragaria vesca subsp. vesca]	-1.02486	0.00597202	0.015658	yes	down		augustus_masked-Fvb5-2-processed-gene-151.7	PREDICTED: putative protein TPRXL [Fragaria vesca subsp. vesca]	1.12743	2.71073e-06	1.21881e-05	yes	up
maker-Fvb7-2-snap-gene-10.38	PREDICTED: polyketide synthase 1 [Fragaria vesca subsp. vesca]	-4.68	0	0	yes	down		maker-Fvb1-4-snap-gene-8.82	PREDICTED: dynein light chain 1, cytoplasmic-like [Fragaria vesca subsp. vesca]	1.82111	5.65227e-12	4.26977e-11	yes	up
snap_masked-Fvb5-3-processed-gene-215.18	PREDICTED: probable serine/threonine-protein kinase At1g18390 [Fragaria vesca subsp. vesca]	-3.49905	0.00412343	0.0112383	yes	down		maker-Fvb6-3-snap-gene-350.53	PREDICTED: receptor-like protein 12 isoform X2 [Fragaria vesca subsp. vesca]	2.08894	8.71856e-08	4.63106e-07	yes	up
maker-Fvb5-3-augustus-gene-211.49	PREDICTED: uncharacterized protein LOC101292020 [Fragaria vesca subsp. vesca]	-1.48473	1.59e-80	8.10728e-79	yes	down		maker-Fvb4-2-snap-gene-22.68	PREDICTED: U-box domain-containing protein 35-like [Fragaria vesca subsp. vesca]	1.51931	4.0711e-07	2.01071e-06	yes	up
maker-Fvb3-2-snap-gene-262.42	PREDICTED: uncharacterized protein LOC101301471 [Fragaria vesca subsp. vesca]	-1.00829	6.51e-11	4.54912e-10	yes	down		maker-Fvb1-2-augustus-gene-68.51	PREDICTED: probable L-type lectin-domain containing receptor kinase S.5 [Fragaria vesca subsp. vesca]	2.07225	4.04892e-20	4.85769e-19	yes	up
maker-Fvb5-2-augustus-gene-73.51	PREDICTED: uncharacterized protein LOC101315349 [Fragaria vesca subsp. vesca]	-1.14204	4.35e-48	1.25512e-46	yes	down		maker-Fvb6-3-snap-gene-379.52	PREDICTED: luminal-binding protein 4 [Fragaria vesca subsp. vesca]	5.14317	6.23177e-07	3.01635e-06	yes	up
maker-Fvb2-1-snap-gene-202.54	PREDICTED: protein arginine N-methyltransferase 1.5 [Fragaria vesca subsp. vesca]	-1.0775	6.03e-21	7.49764e-20	yes	down		maker-Fvb1-2-snap-gene-142.30	PREDICTED: probable trehalose-phosphate phosphatase J [Fragaria vesca subsp. vesca]	1.47777	1.06577e-52	3.37428e-51	yes	up
augustus_masked-Fvb5-2-processed-gene-2.3	PREDICTED: alternative NAD(P)H-ubiquinone oxidoreductase C1, chloroplastic/mitochondrial [Fragaria vesca subsp. vesca]	-1.09333	3.21e-20	3.86924e-19	yes	down		maker-Fvb3-1-augustus-gene-310.51	PREDICTED: starch synthase 3, chloroplastic/amyloplastic [Fragaria vesca subsp. vesca]	1.13014	1.36148e-60	5.03983e-59	yes	up
maker-Fvb1-4-augustus-gene-82.28	PREDICTED: 3&apos;-N-debenzoyl-2&apos;-deoxytaxol N-benzoyltransferase [Fragaria vesca subsp. vesca]	-7.19178	1.23e-11	9.09262e-11	yes	down		augustus_masked-Fvb1-1-processed-gene-120.5	--	5.12244	0.00330163	0.00917517	yes	up
MSTRG.743	2-alkenal reductase (NADP(+)-dependent)-like [Rosa chinensis]	-1.03337	1.91e-23	2.64201e-22	yes	down		maker-Fvb1-2-snap-gene-149.36	PREDICTED: DNA topoisomerase 3-alpha isoform X2 [Fragaria vesca subsp. vesca]	2.05686	0.0124293	0.030213	yes	up
maker-Fvb3-1-augustus-gene-304.62	anthocyanidin reductase [Fragaria x ananassa]	-2.02951	2.75e-157	3.58956e-155	yes	down		maker-Fvb2-4-snap-gene-233.76	PREDICTED: chromosome-associated kinesin KIF4A [Fragaria vesca subsp. vesca]	1.1379	3.01439e-37	6.63056e-36	yes	up
snap_masked-Fvb6-3-processed-gene-346.32	PREDICTED: glycerol-3-phosphate 2-O-acyltransferase 6 [Fragaria vesca subsp. vesca]	-2.00323	4e-11	2.8443e-10	yes	down		maker-Fvb1-3-augustus-gene-132.36	PREDICTED: annexin D1-like [Fragaria vesca subsp. vesca]	1.04588	2.54469e-29	4.38631e-28	yes	up
maker-Fvb2-3-snap-gene-204.12	uncharacterized protein LOC110756507 [Prunus avium]	-1.0517	6.31e-07	3.05124e-06	yes	down		augustus_masked-Fvb5-3-processed-gene-255.33	PREDICTED: uncharacterized protein LOC101295050 [Fragaria vesca subsp. vesca]	2.17383	1.27223e-59	4.62626e-58	yes	up
maker-Fvb7-1-snap-gene-193.62	PREDICTED: delta(8)-fatty-acid desaturase 1-like [Fragaria vesca subsp. vesca]	-1.01615	5.2e-59	1.87141e-57	yes	down		augustus_masked-Fvb7-1-processed-gene-67.0	PREDICTED: RING-H2 finger protein ATL52 [Fragaria vesca subsp. vesca]	1.17338	7.74635e-14	6.66482e-13	yes	up
augustus_masked-Fvb5-3-processed-gene-205.5	PREDICTED: pentatricopeptide repeat-containing protein PNM1, mitochondrial [Fragaria vesca subsp. vesca]	-1.30047	0.000816783	0.00255332	yes	down		maker-Fvb5-4-augustus-gene-83.49	PREDICTED: protein REVEILLE 7-like isoform X1 [Fragaria vesca subsp. vesca]	1.39261	1.06146e-10	7.29115e-10	yes	up
maker-Fvb7-2-augustus-gene-245.69	PREDICTED: multiple inositol polyphosphate phosphatase 1 isoform X1 [Fragaria vesca subsp. vesca]	-1.01946	6.92e-14	5.96734e-13	yes	down		maker-Fvb3-1-augustus-gene-43.30	PREDICTED: probable protein phosphatase 2C 25 [Fragaria vesca subsp. vesca]	2.64062	6.4579e-59	2.32128e-57	yes	up
snap_masked-Fvb5-4-processed-gene-85.40	PREDICTED: uncharacterized protein LOC101309446 [Fragaria vesca subsp. vesca]	-1.11589	2.51e-28	4.18426e-27	yes	down		augustus_masked-Fvb6-4-processed-gene-146.0	PREDICTED: E3 ubiquitin-protein ligase PUB24 [Fragaria vesca subsp. vesca]	2.20708	0.00159641	0.0047227	yes	up
maker-Fvb1-4-snap-gene-71.42	PREDICTED: protein root UVB sensitive 4 [Fragaria vesca subsp. vesca]	-1.20662	3.47e-22	4.55027e-21	yes	down		snap_masked-Fvb7-3-processed-gene-60.35	PREDICTED: zinc finger CCCH domain-containing protein 29-like [Fragaria vesca subsp. vesca]	2.22235	1.13791e-163	1.59064e-161	yes	up
maker-Fvb2-1-augustus-gene-69.32	PREDICTED: laccase-15-like [Fragaria vesca subsp. vesca]	-1.05052	0.00451742	0.0121994	yes	down		augustus_masked-Fvb6-3-processed-gene-169.4	PREDICTED: F-box/LRR-repeat MAX2 homolog A [Fragaria vesca subsp. vesca]	1.9521	8.0887e-20	9.53642e-19	yes	up
snap_masked-Fvb7-3-processed-gene-107.14	PREDICTED: hydroquinone glucosyltransferase-like [Fragaria vesca subsp. vesca]	-1.78715	9.09e-79	4.50552e-77	yes	down		MSTRG.27334	PREDICTED: proline-rich receptor-like protein kinase PERK9 [Pyrus x bretschneideri]	4.9229	7.62544e-06	3.23735e-05	yes	up
maker-Fvb3-1-augustus-gene-222.45	PREDICTED: probable solanesyl-diphosphate synthase 3, chloroplastic [Fragaria vesca subsp. vesca]	-1.12698	4.27e-93	2.68314e-91	yes	down		augustus_masked-Fvb1-4-processed-gene-102.1	PREDICTED: dof zinc finger protein DOF5.7-like [Fragaria vesca subsp. vesca]	1.58456	0.000437632	0.00143492	yes	up
maker-Fvb5-3-augustus-gene-215.61	hypothetical protein RchiOBHm_Chr7g0186221 [Rosa chinensis]	-1.21034	1.66e-26	2.59213e-25	yes	down		augustus_masked-Fvb6-1-processed-gene-37.5	PREDICTED: probable calcium-binding protein CML45 [Fragaria vesca subsp. vesca]	1.31432	0.00106951	0.00327245	yes	up
maker-Fvb2-2-snap-gene-148.69	PREDICTED: nucleolar protein 10 [Fragaria vesca subsp. vesca]	-1.03707	2.29e-34	4.62937e-33	yes	down		maker-Fvb3-3-augustus-gene-221.31	PREDICTED: mitogen-activated protein kinase 3 [Fragaria vesca subsp. vesca]	1.15528	6.91304e-22	8.95325e-21	yes	up
augustus_masked-Fvb7-3-processed-gene-102.6	PREDICTED: protein ASPARTIC PROTEASE IN GUARD CELL 1-like [Fragaria vesca subsp. vesca]	-1.02653	0.000135494	0.000481851	yes	down		maker-Fvb1-4-augustus-gene-1.46	PREDICTED: probable glycosyltransferase At3g07620 [Fragaria vesca subsp. vesca]	1.96743	2.49727e-16	2.47869e-15	yes	up
augustus_masked-Fvb6-4-processed-gene-4.11	PREDICTED: UDP-glycosyltransferase 90A1 [Fragaria vesca subsp. vesca]	-1.19581	7.6e-92	4.66437e-90	yes	down		maker-Fvb3-2-snap-gene-117.48	mannose binding lectin [Fragaria x ananassa subsp. ananassa]	3.63058	2.03393e-05	8.16102e-05	yes	up
maker-Fvb7-2-augustus-gene-217.41	PREDICTED: ethylene-responsive transcription factor RAP2-7-like isoform X1 [Fragaria vesca subsp. vesca]	-1.09334	2.64e-19	3.04614e-18	yes	down		maker-Fvb3-3-snap-gene-225.28	uncharacterized protein LOC112167596 [Rosa chinensis]	2.87182	4.1952e-07	2.06963e-06	yes	up
MSTRG.60486	PREDICTED: uncharacterized protein LOC105350475 [Fragaria vesca subsp. vesca]	-1.1625	4.7e-05	0.000179149	yes	down		snap_masked-Fvb6-4-processed-gene-315.43	uncharacterized protein LOC110754465 [Prunus avium]	2.83791	9.43677e-05	0.000343787	yes	up
maker-Fvb1-4-snap-gene-68.36	PREDICTED: uncharacterized protein LOC101296107 [Fragaria vesca subsp. vesca]	-1.18034	8.53e-13	6.85614e-12	yes	down		augustus_masked-Fvb5-3-processed-gene-5.4	PREDICTED: uncharacterized protein LOC101306050 [Fragaria vesca subsp. vesca]	3.27082	7.87733e-11	5.47485e-10	yes	up
maker-Fvb4-2-augustus-gene-82.38	PREDICTED: auxin-responsive protein IAA31 [Fragaria vesca subsp. vesca]	-2.04765	0.00541741	0.014348	yes	down		augustus_masked-Fvb6-1-processed-gene-243.15	PREDICTED: E3 ubiquitin-protein ligase UPL7 [Fragaria vesca subsp. vesca]	1.00207	6.075e-14	5.2613e-13	yes	up
augustus_masked-Fvb2-3-processed-gene-112.15	PREDICTED: tyrosine decarboxylase 1 [Fragaria vesca subsp. vesca]	-1.84183	0.000511487	0.00165841	yes	down		MSTRG.61579	beta-amyrin 28-oxidase-like [Rosa chinensis]	3.85891	0.021772	0.0496072	yes	up
augustus_masked-Fvb1-2-processed-gene-53.12	PREDICTED: cysteine-rich receptor-like protein kinase 7 [Fragaria vesca subsp. vesca]	-1.2532	2.08e-18	2.30323e-17	yes	down		maker-Fvb3-1-augustus-gene-214.30	PREDICTED: uroporphyrinogen decarboxylase 1, chloroplastic isoform X1 [Fragaria vesca subsp. vesca]	1.42088	0.00921795	0.0231653	yes	up
MSTRG.54367	PREDICTED: uncharacterized protein LOC101315157 [Fragaria vesca subsp. vesca]	-1.49327	0.000119109	0.000427102	yes	down		augustus_masked-Fvb6-4-processed-gene-257.4	PREDICTED: uncharacterized protein LOC101294280 [Fragaria vesca subsp. vesca]	1.22713	3.79073e-09	2.3096e-08	yes	up
maker-Fvb3-4-augustus-gene-213.48	PREDICTED: probable glutathione S-transferase [Fragaria vesca subsp. vesca]	-1.42611	4.22e-40	1.00699e-38	yes	down		MSTRG.29590	PREDICTED: 60S ribosomal protein L5-like [Fragaria vesca subsp. vesca]	2.88467	2.85598e-28	4.74762e-27	yes	up
maker-Fvb7-4-augustus-gene-67.47	PREDICTED: ras-related protein RABE1c-like isoform X1 [Fragaria vesca subsp. vesca]	-1.57347	4.36e-52	1.36216e-50	yes	down		augustus_masked-Fvb7-2-processed-gene-190.10	putative transcription elongation factor SPT5 homolog 1 [Rosa chinensis]	2.38672	1.07241e-07	5.64143e-07	yes	up
augustus_masked-Fvb6-3-processed-gene-196.11	PREDICTED: uncharacterized protein LOC101304307 isoform X1 [Fragaria vesca subsp. vesca]	-2.01774	1.67e-68	7.06827e-67	yes	down		maker-Fvb4-4-augustus-gene-99.48	putative PR10 [Fragaria chiloensis]	4.2156	3.61114e-14	3.16498e-13	yes	up
augustus_masked-Fvb7-3-processed-gene-55.14	PREDICTED: peroxidase P7-like [Fragaria vesca subsp. vesca]	-3.47511	8.14e-05	0.000299281	yes	down		maker-Fvb2-1-snap-gene-201.51	PREDICTED: endonuclease V isoform X2 [Fragaria vesca subsp. vesca]	1.4416	0.010431	0.0258607	yes	up
maker-Fvb3-3-snap-gene-122.48	PREDICTED: uncharacterized protein LOC101299752 [Fragaria vesca subsp. vesca]	-1.24306	4.37e-05	0.000167272	yes	down		maker-Fvb3-3-augustus-gene-167.26	PREDICTED: ubiquitin-conjugating enzyme E2 20 [Fragaria vesca subsp. vesca]	1.9968	0.000114827	0.000412891	yes	up
maker-Fvb1-3-augustus-gene-250.19	PREDICTED: nudix hydrolase 18, mitochondrial-like [Fragaria vesca subsp. vesca]	-2.86739	1.37e-127	1.28805e-125	yes	down		augustus_masked-Fvb7-1-processed-gene-283.10	PREDICTED: dehydration-responsive element-binding protein 1B-like [Fragaria vesca subsp. vesca]	6.03117	3.98684e-08	2.1908e-07	yes	up
maker-Fvb3-3-augustus-gene-112.27	PREDICTED: putative receptor-like protein kinase At4g00960 isoform X2 [Fragaria vesca subsp. vesca]	-1.45284	0.000103529	0.000374682	yes	down		maker-Fvb3-2-augustus-gene-286.61	PREDICTED: root phototropism protein 2 [Fragaria vesca subsp. vesca]	1.17196	7.95177e-23	1.07216e-21	yes	up
maker-Fvb5-1-augustus-gene-7.57	anthocyanidin synthase [Fragaria x ananassa]	-1.30264	5.18e-26	7.92993e-25	yes	down		maker-Fvb7-2-augustus-gene-257.56	PREDICTED: hexose carrier protein HEX6-like [Fragaria vesca subsp. vesca]	2.40486	7.09558e-20	8.39285e-19	yes	up
snap_masked-Fvb6-2-processed-gene-248.29	PREDICTED: dnaJ homolog subfamily B member 3 [Fragaria vesca subsp. vesca]	-1.77765	1.05e-142	1.17939e-140	yes	down		maker-Fvb5-3-snap-gene-45.63	PREDICTED: LOW QUALITY PROTEIN: E3 ubiquitin-protein ligase UPL1-like [Fragaria vesca subsp. vesca]	1.00728	3.07209e-18	3.36622e-17	yes	up
augustus_masked-Fvb6-2-processed-gene-151.4	PREDICTED: germin-like protein subfamily 3 member 2 [Fragaria vesca subsp. vesca]	-1.39907	0.0103023	0.025581	yes	down		maker-Fvb1-2-augustus-gene-29.57	PREDICTED: NADPH:adrenodoxin oxidoreductase, mitochondrial-like [Fragaria vesca subsp. vesca]	2.63645	1.10074e-05	4.5703e-05	yes	up
snap_masked-Fvb7-3-processed-gene-13.37	PREDICTED: LOW QUALITY PROTEIN: 4-coumarate--CoA ligase 2-like [Fragaria vesca subsp. vesca]	-2.21354	1.54e-117	1.30521e-115	yes	down		maker-Fvb4-3-snap-gene-53.69	PREDICTED: ankyrin-2-like [Fragaria vesca subsp. vesca]	4.77227	0.011775	0.0287997	yes	up
snap_masked-Fvb3-3-processed-gene-247.20	PREDICTED: alpha-glucan phosphorylase, H isozyme [Fragaria vesca subsp. vesca]	-2.04108	0	0	yes	down		MSTRG.33980	PREDICTED: CBL-interacting serine/threonine-protein kinase 1 isoform X2 [Fragaria vesca subsp. vesca]	1.22193	2.08555e-33	4.0696e-32	yes	up
augustus_masked-Fvb3-4-processed-gene-201.8	PREDICTED: uncharacterized protein LOC105350456 [Fragaria vesca subsp. vesca]	-1.38487	3.02e-10	2.01106e-09	yes	down		augustus_masked-Fvb4-1-processed-gene-34.4	PREDICTED: LOW QUALITY PROTEIN: ammonium transporter 1 member 1 [Fragaria vesca subsp. vesca]	1.10016	1.49882e-05	6.10726e-05	yes	up
snap_masked-Fvb1-2-processed-gene-126.24	cinnamyl alcohol dehydrogenase [Fragaria x ananassa]	-2.21555	5.44e-11	3.82995e-10	yes	down		augustus_masked-Fvb4-4-processed-gene-99.1	PREDICTED: major allergen Pru ar 1-like [Fragaria vesca subsp. vesca]	2.38166	4.77337e-183	8.23574e-181	yes	up
augustus_masked-Fvb2-2-processed-gene-148.3	PREDICTED: uncharacterized protein LOC105349701 [Fragaria vesca subsp. vesca]	-1.36793	0.000794205	0.00248867	yes	down		augustus_masked-Fvb6-4-processed-gene-71.2	PREDICTED: F-box/LRR-repeat protein 4-like [Fragaria vesca subsp. vesca]	1.79199	0.000396131	0.0013086	yes	up
maker-Fvb4-2-augustus-gene-205.20	PREDICTED: protein trichome birefringence-like 5 [Fragaria vesca subsp. vesca]	-1.14551	5.62e-13	4.56866e-12	yes	down		augustus_masked-Fvb5-2-processed-gene-38.9	PREDICTED: leucine-rich repeat receptor-like serine/threonine/tyrosine-protein kinase SOBIR1 [Fragaria vesca subsp. vesca]	1.04992	1.39306e-17	1.47706e-16	yes	up
MSTRG.34767	PREDICTED: leucine-rich repeat extensin-like protein 4 isoform X2 [Pyrus x bretschneideri]	-1.58653	1.36e-196	2.6903e-194	yes	down		maker-Fvb6-1-snap-gene-218.30	PREDICTED: protein downstream neighbor of Son [Fragaria vesca subsp. vesca]	1.17161	0.0169499	0.0398107	yes	up
maker-Fvb4-3-augustus-gene-299.36	ethylene receptor [Fragaria x ananassa]	-1.36701	1.43e-80	7.3247e-79	yes	down		maker-Fvb5-3-snap-gene-255.115	PREDICTED: uncharacterized protein LOC101294764 [Fragaria vesca subsp. vesca]	1.77585	8.19685e-37	1.78395e-35	yes	up
maker-Fvb4-2-augustus-gene-83.44	PREDICTED: 5&apos;-nucleotidase domain-containing protein 4 [Fragaria vesca subsp. vesca]	-1.05764	8.22e-29	1.39075e-27	yes	down		snap_masked-Fvb6-1-processed-gene-36.21	PREDICTED: ATP-dependent zinc metalloprotease FTSH 6, chloroplastic [Fragaria vesca subsp. vesca]	2.3727	2.9407e-209	6.34218e-207	yes	up
maker-Fvb5-2-snap-gene-121.36	PREDICTED: LOW QUALITY PROTEIN: uncharacterized protein LOC101301394 [Fragaria vesca subsp. vesca]	-1.251	7.13e-33	1.36971e-31	yes	down		MSTRG.43049	PREDICTED: toll/interleukin-1 receptor-like protein isoform X2 [Fragaria vesca subsp. vesca]	1.67755	1.4874e-08	8.5554e-08	yes	up
maker-Fvb5-2-snap-gene-120.50	PREDICTED: uncharacterized protein LOC101305849 [Fragaria vesca subsp. vesca]	-1.05505	1.12e-11	8.30286e-11	yes	down		maker-Fvb3-1-augustus-gene-286.48	PREDICTED: cold-regulated 413 inner membrane protein 2, chloroplastic-like isoform X2 [Fragaria vesca subsp. vesca]	1.09636	1.92439e-24	2.76687e-23	yes	up
maker-Fvb6-1-augustus-gene-44.41	PREDICTED: uncharacterized protein LOC105352445 [Fragaria vesca subsp. vesca]	-1.05717	1.32e-09	8.3269e-09	yes	down		augustus_masked-Fvb1-2-processed-gene-40.3	PREDICTED: phosphatidylinositol/phosphatidylcholine transfer protein SFH12-like [Fragaria vesca subsp. vesca]	1.75464	0.00137997	0.00413357	yes	up
maker-Fvb5-4-snap-gene-59.53	PREDICTED: probable serine/threonine-protein kinase At1g18390 isoform X2 [Fragaria vesca subsp. vesca]	-1.56711	1.27e-05	5.22809e-05	yes	down		maker-Fvb7-3-augustus-gene-99.42	PREDICTED: probable serine/threonine-protein kinase WNK4 isoform X1 [Fragaria vesca subsp. vesca]	2.69551	3.29219e-09	2.01616e-08	yes	up
maker-Fvb5-2-augustus-gene-111.59	uncharacterized protein LOC112176851 isoform X1 [Rosa chinensis]	-1.03593	0.0200957	0.0462612	yes	down		maker-Fvb2-1-augustus-gene-240.37	transcription factor MYB28-like [Fragaria vesca]	1.83248	7.50078e-24	1.05436e-22	yes	up
augustus_masked-Fvb5-3-processed-gene-33.8	PREDICTED: protein TRANSPARENT TESTA 12-like isoform X1 [Fragaria vesca subsp. vesca]	-1.45981	2.78e-85	1.54997e-83	yes	down		snap_masked-Fvb2-1-processed-gene-243.9	PREDICTED: BTB/POZ domain-containing protein At2g30600 [Fragaria vesca subsp. vesca]	1.19443	1.70858e-148	2.04986e-146	yes	up
maker-Fvb6-3-augustus-gene-429.47	PREDICTED: serine/threonine-protein kinase HT1 [Fragaria vesca subsp. vesca]	-1.04508	1.83e-27	2.9471e-26	yes	down		snap_masked-Fvb4-2-processed-gene-204.17	putative nucleic acid-binding protein [Rosa chinensis]	1.01068	4.80946e-09	2.89793e-08	yes	up
maker-Fvb7-4-augustus-gene-19.70	PREDICTED: probable WRKY transcription factor 27 [Fragaria vesca subsp. vesca]	-2.26285	7.69e-07	3.68534e-06	yes	down		MSTRG.57160	putative cysteine-rich transmembrane CYSTM domain-containing protein [Rosa chinensis]	1.88915	2.57571e-19	2.97248e-18	yes	up
maker-Fvb7-4-augustus-gene-103.44	PREDICTED: putative glucose-6-phosphate 1-epimerase isoform X1 [Fragaria vesca subsp. vesca]	-1.22365	1.14e-32	2.18303e-31	yes	down		maker-Fvb6-1-augustus-gene-63.44	PREDICTED: L-ascorbate oxidase homolog [Fragaria vesca subsp. vesca]	1.98649	3.41461e-11	2.43984e-10	yes	up
maker-Fvb4-1-augustus-gene-143.25	PREDICTED: heme-binding protein 2-like [Fragaria vesca subsp. vesca]	-1.68579	8.69e-42	2.15808e-40	yes	down		maker-Fvb1-3-augustus-gene-109.28	PREDICTED: probable xyloglucan endotransglucosylase/hydrolase protein 6 [Fragaria vesca subsp. vesca]	1.81677	3.32062e-182	5.66451e-180	yes	up
augustus_masked-Fvb6-4-processed-gene-107.2	pentatricopeptide repeat-containing protein At3g09650, chloroplastic [Rosa chinensis]	-1.01395	7.56e-30	1.32673e-28	yes	down		maker-Fvb5-3-augustus-gene-33.28	PREDICTED: uncharacterized protein LOC101303619 [Fragaria vesca subsp. vesca]	1.39251	4.62857e-11	3.27138e-10	yes	up
maker-Fvb1-3-snap-gene-103.67	PREDICTED: L-type lectin-domain containing receptor kinase IX.1-like [Fragaria vesca subsp. vesca]	-1.7255	0.016321	0.0384692	yes	down		MSTRG.20331	PREDICTED: plasma membrane-associated cation-binding protein 1-like [Fragaria vesca subsp. vesca]	1.07064	2.82921e-26	4.37999e-25	yes	up
maker-Fvb6-2-snap-gene-346.53	PREDICTED: SNF1-related protein kinase regulatory subunit beta-2-like [Fragaria vesca subsp. vesca]	-3.92714	5.89e-199	1.17738e-196	yes	down		maker-Fvb4-3-snap-gene-294.39	PREDICTED: uncharacterized protein LOC105352611 [Fragaria vesca subsp. vesca]	1.96786	6.53833e-12	4.91574e-11	yes	up
augustus_masked-Fvb1-3-processed-gene-73.6	PREDICTED: syntaxin-112 [Fragaria vesca subsp. vesca]	-3.5018	0.00622574	0.016262	yes	down		maker-Fvb7-1-snap-gene-275.46	PREDICTED: TMV resistance protein N-like [Fragaria vesca subsp. vesca]	1.05092	4.40829e-13	3.60614e-12	yes	up
maker-Fvb4-2-snap-gene-28.42	hypothetical protein RchiOBHm_Chr2g0161601 [Rosa chinensis]	-1.59374	7.49e-07	3.59694e-06	yes	down		snap_masked-Fvb7-2-processed-gene-247.23	PREDICTED: wound-induced protein 1 [Fragaria vesca subsp. vesca]	1.84046	8.99014e-23	1.20947e-21	yes	up
maker-Fvb5-1-augustus-gene-138.41	PREDICTED: protein phosphatase 2C 29 [Fragaria vesca subsp. vesca]	-1.39501	3.07e-06	1.37028e-05	yes	down		augustus_masked-Fvb5-2-processed-gene-26.17	COP1-interactive protein 1 isoform X1 [Rosa chinensis]	1.11137	6.13623e-44	1.61436e-42	yes	up
maker-Fvb4-2-snap-gene-104.33	PREDICTED: sodium/hydrogen exchanger 2-like [Fragaria vesca subsp. vesca]	-1.2685	2.3e-16	2.28455e-15	yes	down		maker-Fvb7-4-snap-gene-87.58	PREDICTED: 3-phosphoinositide-dependent protein kinase 2 [Fragaria vesca subsp. vesca]	1.23356	1.39735e-26	2.18569e-25	yes	up
maker-Fvb6-4-augustus-gene-58.34	PREDICTED: polygalacturonase At1g48100-like [Fragaria vesca subsp. vesca]	-2.48847	0.00103163	0.00316561	yes	down		MSTRG.8082	putative squalene monooxygenase [Rosa chinensis]	2.4828	1.2919e-18	1.44205e-17	yes	up
MSTRG.21236	PREDICTED: P-loop NTPase domain-containing protein LPA1 homolog 2-like [Fragaria vesca subsp. vesca]	-1.9026	1.89e-60	6.94799e-59	yes	down		augustus_masked-Fvb4-4-processed-gene-100.14	PREDICTED: major allergen Pru ar 1-like [Fragaria vesca subsp. vesca]	4.32869	2.17645e-299	8.57153e-297	yes	up
maker-Fvb5-2-augustus-gene-35.81	PREDICTED: probable LRR receptor-like serine/threonine-protein kinase At4g26540 [Fragaria vesca subsp. vesca]	-2.48288	1.56e-09	9.83764e-09	yes	down		augustus_masked-Fvb3-4-processed-gene-247.12	PREDICTED: ethylene-responsive transcription factor 4 [Fragaria vesca subsp. vesca]	2.16435	1.00163e-104	7.27575e-103	yes	up
maker-Fvb6-2-snap-gene-170.37	PREDICTED: uncharacterized protein LOC101298344 isoform X1 [Fragaria vesca subsp. vesca]	-1.48707	1.24e-130	1.20422e-128	yes	down		augustus_masked-Fvb1-1-processed-gene-271.7	PREDICTED: heat shock 70 kDa protein [Fragaria vesca subsp. vesca]	2.54075	8.39491e-34	1.66503e-32	yes	up
maker-Fvb3-1-snap-gene-211.31	PREDICTED: transcription factor TCP4 [Fragaria vesca subsp. vesca]	-1.0096	1.69e-30	3.01957e-29	yes	down		maker-Fvb3-2-augustus-gene-62.45	PREDICTED: transcription factor JUNGBRUNNEN 1-like [Fragaria vesca subsp. vesca]	3.20819	0.0013318	0.00400131	yes	up
maker-Fvb7-2-snap-gene-247.63	PREDICTED: uncharacterized protein LOC101308136 isoform X2 [Fragaria vesca subsp. vesca]	-1.38388	4.85e-76	2.3196e-74	yes	down		maker-Fvb3-2-augustus-gene-8.34	PREDICTED: peroxisomal (S)-2-hydroxy-acid oxidase GLO1 [Fragaria vesca subsp. vesca]	3.47594	0.0137107	0.0329521	yes	up
snap_masked-Fvb1-4-processed-gene-23.30	PREDICTED: cysteine-rich receptor-like protein kinase 7 [Fragaria vesca subsp. vesca]	-1.18294	3.53e-48	1.02123e-46	yes	down		MSTRG.19438	PREDICTED: tonoplast dicarboxylate transporter-like isoform X2 [Fragaria vesca subsp. vesca]	1.5916	1.33117e-54	4.39268e-53	yes	up
maker-Fvb1-4-augustus-gene-159.11	PREDICTED: ultraviolet-B receptor UVR8 isoform X1 [Fragaria vesca subsp. vesca]	-1.22094	6.31e-48	1.81773e-46	yes	down		augustus_masked-Fvb5-2-processed-gene-18.11	uncharacterized protein LOC112180661 [Rosa chinensis]	2.50991	0.00103205	0.00316681	yes	up
maker-Fvb7-3-augustus-gene-14.50	PREDICTED: D-xylose-proton symporter-like 2 isoform X1 [Fragaria vesca subsp. vesca]	-1.04739	1.06e-33	2.09338e-32	yes	down		augustus_masked-Fvb4-1-processed-gene-184.0	PREDICTED: U-box domain-containing protein 21-like [Fragaria vesca subsp. vesca]	2.75529	3.16314e-16	3.12352e-15	yes	up
maker-Fvb5-3-augustus-gene-216.55	PREDICTED: transcription repressor MYB5-like [Fragaria vesca subsp. vesca]	-2.5024	0.00527073	0.0140008	yes	down		augustus_masked-Fvb2-2-processed-gene-15.7	PREDICTED: uncharacterized protein LOC101312951 [Fragaria vesca subsp. vesca]	1.98536	1.43887e-08	8.29048e-08	yes	up
maker-Fvb2-1-augustus-gene-252.44	PREDICTED: V-type proton ATPase subunit a3-like [Fragaria vesca subsp. vesca]	-1.26207	8.83e-36	1.86408e-34	yes	down		maker-Fvb1-2-snap-gene-192.28	PREDICTED: myb-related protein Myb4 [Fragaria vesca subsp. vesca]	2.11619	0.012301	0.0299261	yes	up
MSTRG.42831	PREDICTED: uncharacterized protein LOC105351484 [Fragaria vesca subsp. vesca]	-1.42658	1.53e-06	7.07114e-06	yes	down		MSTRG.19586	PREDICTED: ornithine aminotransferase, mitochondrial [Fragaria vesca subsp. vesca]	1.71538	6.272e-28	1.03033e-26	yes	up
maker-Fvb3-2-augustus-gene-278.45	PREDICTED: UDP-glycosyltransferase 87A1-like [Fragaria vesca subsp. vesca]	-1.21478	1.29e-39	3.03761e-38	yes	down		MSTRG.18728	oxysterol-binding protein-related protein 3C isoform X1 [Prunus persica]	5.12842	1.44377e-24	2.0861e-23	yes	up
augustus_masked-Fvb6-4-processed-gene-180.1	PREDICTED: uncharacterized protein LOC101304307 isoform X3 [Fragaria vesca subsp. vesca]	-1.87113	2.15e-07	1.09393e-06	yes	down		maker-Fvb3-1-augustus-gene-199.29	PREDICTED: protochlorophyllide reductase, chloroplastic [Fragaria vesca subsp. vesca]	1.73429	8.94425e-220	2.08809e-217	yes	up
maker-Fvb2-4-augustus-gene-258.73	uncharacterized protein LOC112170425 [Rosa chinensis]	-1.3776	1.83e-92	1.13412e-90	yes	down		MSTRG.47400	PREDICTED: dnaJ protein ERDJ3A [Fragaria vesca subsp. vesca]	1.43259	1.49091e-10	1.01342e-09	yes	up
augustus_masked-Fvb4-2-processed-gene-61.0	PREDICTED: ABC transporter B family member 26, chloroplastic [Fragaria vesca subsp. vesca]	-2.05935	4.47e-23	6.09214e-22	yes	down		maker-Fvb2-2-augustus-gene-50.47	PREDICTED: BTB/POZ domain-containing protein At1g03010 isoform X1 [Fragaria vesca subsp. vesca]	1.33517	1.93634e-15	1.83257e-14	yes	up
maker-Fvb3-4-augustus-gene-198.36	PREDICTED: myb-like protein J [Fragaria vesca subsp. vesca]	-1.55877	2.42e-28	4.03381e-27	yes	down		maker-Fvb6-3-snap-gene-135.43	PREDICTED: pyridoxal 5&apos;-phosphate synthase-like subunit PDX1.2 [Fragaria vesca subsp. vesca]	1.29944	0.000736441	0.00232051	yes	up
augustus_masked-Fvb2-1-processed-gene-38.6	PREDICTED: RING-H2 finger protein ATL65 [Fragaria vesca subsp. vesca]	-1.11636	0.000171688	0.000601145	yes	down		augustus_masked-Fvb5-3-processed-gene-238.16	PREDICTED: leucine-rich repeat receptor-like serine/threonine/tyrosine-protein kinase SOBIR1 [Fragaria vesca subsp. vesca]	1.10246	4.24755e-37	9.30691e-36	yes	up
maker-Fvb3-3-augustus-gene-267.54	PREDICTED: uncharacterized protein LOC101309040 [Fragaria vesca subsp. vesca]	-1.8904	0.00803568	0.0204864	yes	down		maker-Fvb2-3-augustus-gene-41.74	PREDICTED: protein FD [Fragaria vesca subsp. vesca]	1.6958	2.00545e-05	8.05211e-05	yes	up
maker-Fvb6-2-augustus-gene-9.46	PREDICTED: uncharacterized protein LOC101301899 isoform X1 [Fragaria vesca subsp. vesca]	-1.22718	2.92e-08	1.62797e-07	yes	down		augustus_masked-Fvb3-1-processed-gene-24.8	PREDICTED: chaperone protein dnaJ 11, chloroplastic [Fragaria vesca subsp. vesca]	1.44273	4.14382e-09	2.51408e-08	yes	up
maker-Fvb1-1-augustus-gene-93.37	PREDICTED: protein S-acyltransferase 18 [Fragaria vesca subsp. vesca]	-3.21354	0.00844633	0.0214265	yes	down		maker-Fvb5-1-augustus-gene-75.57	PREDICTED: kinesin-like protein NACK1 [Fragaria vesca subsp. vesca]	1.58596	4.37407e-55	1.45718e-53	yes	up
snap_masked-Fvb3-2-processed-gene-57.21	dihydroceramide fatty acyl 2-hydroxylase FAH1-like isoform X3 [Rosa chinensis]	-3.47628	9.63e-253	2.89836e-250	yes	down		snap_masked-Fvb6-2-processed-gene-166.12	PREDICTED: UDP-glycosyltransferase 73C1-like [Fragaria vesca subsp. vesca]	1.10413	0.0150947	0.0359228	yes	up
maker-Fvb2-3-augustus-gene-3.32	PREDICTED: transcription factor TT2-like [Fragaria vesca subsp. vesca]	-2.06141	0.0171954	0.0403225	yes	down		maker-Fvb6-4-augustus-gene-323.23	PREDICTED: uncharacterized protein LOC101314197 [Fragaria vesca subsp. vesca]	1.08243	3.4613e-08	1.91702e-07	yes	up
maker-Fvb1-4-snap-gene-118.50	PREDICTED: N6-adenosine-methyltransferase MT-A70-like isoform X1 [Fragaria vesca subsp. vesca]	-2.82757	0.00382734	0.0104976	yes	down		augustus_masked-Fvb2-2-processed-gene-165.2	PREDICTED: organ-specific protein P4-like [Fragaria vesca subsp. vesca]	2.34854	5.97772e-14	5.17903e-13	yes	up
MSTRG.16632	PREDICTED: SCP2 sterol-binding domain-containing protein 1-like [Fragaria vesca subsp. vesca]	-1.03147	0.00158014	0.00468027	yes	down		augustus_masked-Fvb7-4-processed-gene-5.4	PREDICTED: probable serine/threonine-protein kinase kinX [Fragaria vesca subsp. vesca]	3.15493	1.40067e-11	1.03066e-10	yes	up
maker-Fvb5-1-augustus-gene-32.63	PREDICTED: uncharacterized protein LOC101311570 [Fragaria vesca subsp. vesca]	-2.05766	0.018276	0.0425436	yes	down		maker-Fvb7-3-augustus-gene-36.51	PREDICTED: gibberellin 20 oxidase 1 [Fragaria vesca subsp. vesca]	1.68617	4.76562e-88	2.77604e-86	yes	up
maker-Fvb6-2-snap-gene-235.48	PREDICTED: uncharacterized protein LOC101307509 [Fragaria vesca subsp. vesca]	-1.73257	3.15e-18	3.44971e-17	yes	down		maker-Fvb5-1-snap-gene-146.37	uncharacterized protein LOC110746202 [Prunus avium]	1.01319	1.20674e-05	4.98189e-05	yes	up
snap_masked-Fvb7-4-processed-gene-40.46	PREDICTED: adenine/guanine permease AZG1 [Fragaria vesca subsp. vesca]	-1.2812	0.00331	0.00919646	yes	down		maker-Fvb4-3-snap-gene-165.35	PREDICTED: thermospermine synthase ACAULIS5-like [Fragaria vesca subsp. vesca]	1.63652	0.00065449	0.00208147	yes	up
maker-Fvb6-1-augustus-gene-230.35	PREDICTED: protein trichome birefringence-like 8 [Fragaria vesca subsp. vesca]	-2.48825	1.16e-09	7.37785e-09	yes	down		maker-Fvb5-1-augustus-gene-147.35	PREDICTED: uncharacterized protein LOC101299587 [Fragaria vesca subsp. vesca]	4.41425	7.75669e-08	4.14396e-07	yes	up
maker-Fvb4-3-augustus-gene-316.32	PREDICTED: probable serine/threonine-protein kinase abkC [Fragaria vesca subsp. vesca]	-1.47956	1.39e-43	3.63239e-42	yes	down		maker-Fvb1-2-augustus-gene-235.10	PREDICTED: cysteine-rich repeat secretory protein 60 [Fragaria vesca subsp. vesca]	1.42307	6.41619e-05	0.000239526	yes	up
maker-Fvb2-4-augustus-gene-91.26	PREDICTED: putative laccase-9 [Fragaria vesca subsp. vesca]	-1.52036	9.31e-94	5.96399e-92	yes	down		maker-Fvb6-4-augustus-gene-224.34	PREDICTED: 26.5 kDa heat shock protein, mitochondrial-like [Fragaria vesca subsp. vesca]	2.06885	4.12364e-12	3.14678e-11	yes	up
maker-Fvb4-4-augustus-gene-105.50	PREDICTED: sugar transporter ERD6-like 16 isoform X1 [Fragaria vesca subsp. vesca]	-3.32953	3.17e-32	5.97987e-31	yes	down		MSTRG.66123	PREDICTED: uncharacterized protein LOC101311801 [Fragaria vesca subsp. vesca]	2.49409	6.00568e-68	2.52906e-66	yes	up
maker-Fvb4-4-augustus-gene-11.52	PREDICTED: uncharacterized protein LOC101302063 [Fragaria vesca subsp. vesca]	-1.39392	6.33e-18	6.83285e-17	yes	down		snap_masked-Fvb5-4-processed-gene-93.17	PREDICTED: ethylene-responsive transcription factor 5 [Fragaria vesca subsp. vesca]	4.51792	2.20909e-30	3.94288e-29	yes	up
maker-Fvb5-1-augustus-gene-71.60	PREDICTED: uncharacterized protein LOC101303763 [Fragaria vesca subsp. vesca]	-1.84328	1.03e-19	1.20251e-18	yes	down		augustus_masked-Fvb6-4-processed-gene-293.0	PREDICTED: cysteine-rich and transmembrane domain-containing protein B-like [Fragaria vesca subsp. vesca]	5.49107	2.43683e-06	1.10123e-05	yes	up
MSTRG.14287	uncharacterized protein LOC112200370 [Rosa chinensis]	-1.44846	7.25e-06	3.08941e-05	yes	down		snap_masked-Fvb2-1-processed-gene-192.19	uncharacterized protein LOC112178068 [Rosa chinensis]	2.61109	0.0133963	0.0322888	yes	up
MSTRG.56303	PREDICTED: uncharacterized protein LOC101304307 isoform X3 [Fragaria vesca subsp. vesca]	-1.87113	2.15e-07	1.09393e-06	yes	down		maker-Fvb5-3-augustus-gene-240.52	uncharacterized protein LOC112180379 [Rosa chinensis]	1.75748	5.77282e-18	6.24144e-17	yes	up
maker-Fvb7-3-augustus-gene-162.28	PREDICTED: protein ECERIFERUM 1-like [Fragaria vesca subsp. vesca]	-1.68794	2.5e-44	6.63234e-43	yes	down		maker-Fvb5-3-snap-gene-38.44	PREDICTED: protein ASPARTIC PROTEASE IN GUARD CELL 2 [Fragaria vesca subsp. vesca]	1.67083	3.39503e-15	3.16873e-14	yes	up
MSTRG.40339	PREDICTED: protein TRANSPARENT TESTA 12-like [Fragaria vesca subsp. vesca]	-4.13827	1.65e-10	1.11771e-09	yes	down		MSTRG.25572	PREDICTED: heterogeneous nuclear ribonucleoproteins A2/B1-like [Fragaria vesca subsp. vesca]	1.77586	0.0149273	0.0355693	yes	up
MSTRG.50894	PREDICTED: uncharacterized protein LOC101311207 [Fragaria vesca subsp. vesca]	-1.08506	2.41e-06	1.08794e-05	yes	down		augustus_masked-Fvb5-4-processed-gene-11.2	PREDICTED: putative methyltransferase DDB_G0268948 [Fragaria vesca subsp. vesca]	2.71107	1.1108e-08	6.47434e-08	yes	up
MSTRG.64195	PREDICTED: uncharacterized protein LOC101308701 [Fragaria vesca subsp. vesca]	-1.14274	0.000434349	0.00142534	yes	down		maker-Fvb5-2-snap-gene-136.46	putative small auxin-up RNA [Rosa chinensis]	1.40572	1.29857e-05	5.34057e-05	yes	up
maker-Fvb1-3-snap-gene-73.70	PREDICTED: uncharacterized protein LOC101313160 [Fragaria vesca subsp. vesca]	-1.21228	1.27e-84	7.01564e-83	yes	down		MSTRG.15213	PREDICTED: auxin-induced protein 15A-like [Fragaria vesca subsp. vesca]	1.62914	3.66789e-05	0.000141905	yes	up
maker-Fvb6-1-augustus-gene-114.73	laccase-14-like [Rosa chinensis]	-1.91499	3.86e-11	2.74752e-10	yes	down		maker-Fvb2-1-augustus-gene-109.43	PREDICTED: uncharacterized protein LOC101296442 [Fragaria vesca subsp. vesca]	1.54687	1.8309e-25	2.74487e-24	yes	up
maker-Fvb4-3-augustus-gene-267.42	PREDICTED: protein CHLOROPLAST IMPORT APPARATUS 2-like isoform X1 [Fragaria vesca subsp. vesca]	-1.27753	1.04e-101	7.33331e-100	yes	down		maker-Fvb4-1-snap-gene-183.52	PREDICTED: purple acid phosphatase 8-like [Fragaria vesca subsp. vesca]	1.72161	4.64947e-65	1.86022e-63	yes	up
maker-Fvb5-1-augustus-gene-130.60	PREDICTED: beta-amylase 3, chloroplastic [Fragaria vesca subsp. vesca]	-6.14944	0	0	yes	down		maker-Fvb6-2-snap-gene-57.86	PREDICTED: uncharacterized protein LOC101301699 [Fragaria vesca subsp. vesca]	1.22344	4.41877e-07	2.17483e-06	yes	up
maker-Fvb7-2-snap-gene-85.61	PREDICTED: peptidyl-prolyl cis-trans isomerase FKBP20-2, chloroplastic [Fragaria vesca subsp. vesca]	-1.1721	6.62e-09	3.93892e-08	yes	down		maker-Fvb1-3-augustus-gene-17.55	PREDICTED: uncharacterized protein LOC101300482 [Fragaria vesca subsp. vesca]	1.86069	5.11557e-08	2.77919e-07	yes	up
maker-Fvb6-2-augustus-gene-348.42	probable cinnamyl alcohol dehydrogenase 1 [Rosa chinensis]	-1.11705	2.84e-14	2.50525e-13	yes	down		maker-Fvb5-1-snap-gene-63.66	putative PLAC8 motif-containing protein [Rosa chinensis]	5.17709	0.00274691	0.00776488	yes	up
maker-Fvb2-3-augustus-gene-52.50	PREDICTED: probable lactoylglutathione lyase, chloroplast [Fragaria vesca subsp. vesca]	-1.2905	9.09e-41	2.20256e-39	yes	down		maker-Fvb4-4-augustus-gene-244.35	PREDICTED: probable xyloglucan endotransglucosylase/hydrolase protein 23 [Fragaria vesca subsp. vesca]	2.16797	7.70801e-99	5.21044e-97	yes	up
maker-Fvb1-2-snap-gene-32.79	PREDICTED: heat stress transcription factor C-1 [Fragaria vesca subsp. vesca]	-2.40649	6.02e-71	2.64802e-69	yes	down		maker-Fvb3-4-snap-gene-5.49	PREDICTED: probable disease resistance protein At4g27220 [Fragaria vesca subsp. vesca]	1.30378	7.1457e-16	6.91522e-15	yes	up
maker-Fvb4-3-augustus-gene-61.40	PREDICTED: transcription factor bHLH128 isoform X1 [Fragaria vesca subsp. vesca]	-1.03863	0.000369288	0.00122574	yes	down		maker-Fvb3-2-augustus-gene-273.22	PREDICTED: probable N-acetyltransferase HLS1 [Fragaria vesca subsp. vesca]	2.36441	0.00018909	0.000658109	yes	up
maker-Fvb3-1-snap-gene-130.47	PREDICTED: protein SYM1 [Fragaria vesca subsp. vesca]	-1.54282	2.67e-10	1.78086e-09	yes	down		augustus_masked-Fvb6-1-processed-gene-214.2	PREDICTED: F-box/kelch-repeat protein At1g15670-like [Fragaria vesca subsp. vesca]	3.80371	2.54439e-14	2.24874e-13	yes	up
maker-Fvb7-2-augustus-gene-39.46	PREDICTED: uncharacterized protein LOC101305115 [Fragaria vesca subsp. vesca]	-1.13668	1.86e-27	3.00644e-26	yes	down		MSTRG.13919	PREDICTED: scarecrow-like protein 1 [Fragaria vesca subsp. vesca]	1.09678	7.08983e-29	1.20263e-27	yes	up
augustus_masked-Fvb6-2-processed-gene-308.4	UDP-glycosyltransferase 708C1-like [Rosa chinensis]	-2.69621	4.63e-05	0.000176484	yes	down		maker-Fvb6-3-snap-gene-391.58	PREDICTED: cysteine synthase-like isoform X1 [Fragaria vesca subsp. vesca]	1.54245	3.40587e-115	2.79698e-113	yes	up
maker-Fvb6-1-augustus-gene-357.46	PREDICTED: ALBINO3-like protein 2, chloroplastic [Fragaria vesca subsp. vesca]	-1.1675	4.31e-11	3.05429e-10	yes	down		augustus_masked-Fvb1-4-processed-gene-36.18	PREDICTED: protein ELF4-LIKE 3 [Fragaria vesca subsp. vesca]	1.47181	1.28435e-22	1.71336e-21	yes	up
maker-Fvb4-2-snap-gene-128.35	PREDICTED: myb family transcription factor APL isoform X1 [Fragaria vesca subsp. vesca]	-1.2806	5.51e-15	5.08086e-14	yes	down		maker-Fvb1-1-augustus-gene-167.41	PREDICTED: uncharacterized protein LOC101307152 isoform X1 [Fragaria vesca subsp. vesca]	2.18586	3.09587e-223	7.45818e-221	yes	up
augustus_masked-Fvb3-3-processed-gene-174.2	PREDICTED: protein TIC 20-v, chloroplastic [Fragaria vesca subsp. vesca]	-1.32201	1.89e-28	3.15474e-27	yes	down		augustus_masked-Fvb3-2-processed-gene-307.5	PREDICTED: receptor-like protein 2 [Fragaria vesca subsp. vesca]	3.90367	0.00477376	0.0128141	yes	up
maker-Fvb4-1-augustus-gene-2.21	PREDICTED: uncharacterized aarF domain-containing protein kinase At1g71810, chloroplastic [Fragaria vesca subsp. vesca]	-1.85085	3.2e-275	1.08179e-272	yes	down		MSTRG.52679	PREDICTED: probable CCR4-associated factor 1 homolog 11 isoform X1 [Fragaria vesca subsp. vesca]	2.27838	1.71731e-15	1.63073e-14	yes	up
maker-Fvb4-4-augustus-gene-89.29	PREDICTED: galactinol synthase 2-like [Fragaria vesca subsp. vesca]	-1.13634	2.19e-06	9.93139e-06	yes	down		augustus_masked-Fvb6-4-processed-gene-76.12	PREDICTED: abscisic acid receptor PYL4 [Fragaria vesca subsp. vesca]	2.27944	1.24015e-49	3.70006e-48	yes	up
maker-Fvb1-3-snap-gene-219.20	PREDICTED: uncharacterized protein LOC101300857 [Fragaria vesca subsp. vesca]	-1.66331	0.0128381	0.0311007	yes	down		maker-Fvb7-2-snap-gene-269.64	PREDICTED: alpha-L-fucosidase 1-like [Fragaria vesca subsp. vesca]	1.02382	3.01394e-08	1.67993e-07	yes	up
maker-Fvb1-4-augustus-gene-34.53	PREDICTED: diacylglycerol O-acyltransferase 1 [Fragaria vesca subsp. vesca]	-1.14557	1.65e-34	3.33926e-33	yes	down		maker-Fvb4-3-augustus-gene-112.37	PREDICTED: probable xyloglucan endotransglucosylase/hydrolase protein B [Fragaria vesca subsp. vesca]	3.24849	1.29716e-52	4.10116e-51	yes	up
snap_masked-Fvb2-1-processed-gene-259.48	PREDICTED: type I inositol 1,4,5-trisphosphate 5-phosphatase 11 [Fragaria vesca subsp. vesca]	-2.6063	3.39e-06	1.50543e-05	yes	down		augustus_masked-Fvb6-2-processed-gene-291.17	hypothetical protein RchiOBHm_Chr2g0170881 [Rosa chinensis]	2.16937	5.76212e-09	3.44992e-08	yes	up
maker-Fvb1-2-snap-gene-190.33	PREDICTED: probable tyrosine-protein kinase DDB_G0283397 [Fragaria vesca subsp. vesca]	-1.55956	8.73e-39	2.01182e-37	yes	down		maker-Fvb1-2-augustus-gene-73.82	PREDICTED: LOW QUALITY PROTEIN: DNA-directed RNA polymerase II subunit 1 [Fragaria vesca subsp. vesca]	1.25109	2.83292e-05	0.000111419	yes	up
MSTRG.20897	PREDICTED: 1-deoxy-D-xylulose 5-phosphate reductoisomerase, chloroplastic [Fragaria vesca subsp. vesca]	-1.4178	8.6e-06	3.62393e-05	yes	down		MSTRG.16813	PREDICTED: galactose oxidase-like [Fragaria vesca subsp. vesca]	1.14555	7.68104e-07	3.68339e-06	yes	up
snap_masked-Fvb4-3-processed-gene-25.21	PREDICTED: probable sulfate transporter 3.3 [Fragaria vesca subsp. vesca]	-1.16246	2.66e-39	6.21113e-38	yes	down		maker-Fvb7-2-augustus-gene-195.54	PREDICTED: cytochrome P450 CYP82D47-like [Fragaria vesca subsp. vesca]	4.72936	3.48455e-296	1.33179e-293	yes	up
maker-Fvb4-1-augustus-gene-29.36	PREDICTED: uncharacterized protein LOC101309817 [Fragaria vesca subsp. vesca]	-1.28482	1.98e-101	1.38804e-99	yes	down		augustus_masked-Fvb4-1-processed-gene-163.12	PREDICTED: phosphatidylinositol 4-kinase gamma 7-like [Fragaria vesca subsp. vesca]	1.08197	6.07783e-58	2.14885e-56	yes	up
maker-Fvb6-1-snap-gene-365.76	PREDICTED: 2-alkenal reductase (NADP(+)-dependent) [Fragaria vesca subsp. vesca]	-1.26009	8.33e-15	7.58852e-14	yes	down		maker-Fvb2-2-augustus-gene-214.30	PREDICTED: probable zinc metallopeptidase EGY3, chloroplastic [Fragaria vesca subsp. vesca]	1.07173	4.79752e-87	2.74173e-85	yes	up
maker-Fvb5-1-augustus-gene-150.21	PREDICTED: alpha/beta hydrolase domain-containing protein 17B [Fragaria vesca subsp. vesca]	-1.97032	0.00649074	0.016888	yes	down		augustus_masked-Fvb2-2-processed-gene-154.12	PREDICTED: auxin-induced protein 15A-like [Fragaria vesca subsp. vesca]	1.31938	4.53146e-11	3.20399e-10	yes	up
maker-Fvb6-1-augustus-gene-343.47	uncharacterized protein At2g29880-like [Rosa chinensis]	-1.08493	1.85e-06	8.49342e-06	yes	down		MSTRG.46706	PREDICTED: uncharacterized protein LOC101312170 [Fragaria vesca subsp. vesca]	1.6314	4.3514e-14	3.79542e-13	yes	up
maker-Fvb5-1-augustus-gene-91.55	PREDICTED: NAC domain-containing protein 100 [Fragaria vesca subsp. vesca]	-1.00689	0.00852795	0.0216057	yes	down		augustus_masked-Fvb3-3-processed-gene-97.6	PREDICTED: ethylene-responsive transcription factor 4 [Fragaria vesca subsp. vesca]	1.78452	4.67323e-20	5.5823e-19	yes	up
MSTRG.57302	PREDICTED: probable disease resistance protein At5g66900 isoform X1 [Fragaria vesca subsp. vesca]	-3.37573	3.13e-07	1.56287e-06	yes	down		maker-Fvb7-4-augustus-gene-177.32	PREDICTED: hippocampus abundant transcript-like protein 1 isoform X1 [Fragaria vesca subsp. vesca]	1.56723	1.8224e-11	1.32996e-10	yes	up
snap_masked-Fvb3-3-processed-gene-35.36	PREDICTED: protein kinase PINOID [Fragaria vesca subsp. vesca]	-4.69547	0.0163384	0.0385051	yes	down		maker-Fvb7-2-snap-gene-267.66	hypothetical protein RchiOBHm_Chr4g0427731 [Rosa chinensis]	1.35804	0.0216225	0.0493112	yes	up
MSTRG.2277	PREDICTED: kinesin-13A-like [Fragaria vesca subsp. vesca]	-1.44035	1.06e-50	3.23962e-49	yes	down		maker-Fvb7-4-snap-gene-32.70	PREDICTED: FBD-associated F-box protein At4g10400-like [Fragaria vesca subsp. vesca]	2.15903	0.00146827	0.00437664	yes	up
maker-Fvb6-4-augustus-gene-68.42	PREDICTED: uncharacterized protein LOC101315446 isoform X1 [Fragaria vesca subsp. vesca]	-1.02679	6.22e-42	1.55268e-40	yes	down		MSTRG.24655	PREDICTED: cation/H(+) antiporter 15-like [Fragaria vesca subsp. vesca]	1.06984	3.15816e-06	1.40858e-05	yes	up
augustus_masked-Fvb2-4-processed-gene-113.6	60S ribosomal protein L18-2-like [Rosa chinensis]	-1.6264	2.34e-08	1.32063e-07	yes	down		maker-Fvb6-2-augustus-gene-114.23	calcium-dependent protein kinase [Fragaria x ananassa]	2.03947	2.6615e-64	1.05276e-62	yes	up
maker-Fvb5-3-snap-gene-24.35	ubiquitin-activating enzyme E1 1-like [Rosa chinensis]	-1.00755	7.27e-06	3.09554e-05	yes	down		augustus_masked-Fvb1-1-processed-gene-223.11	PREDICTED: F-box protein SKIP23-like [Fragaria vesca subsp. vesca]	4.86842	4.38593e-29	7.48599e-28	yes	up
maker-Fvb4-2-snap-gene-228.44	PREDICTED: CRIB domain-containing protein RIC6-like [Fragaria vesca subsp. vesca]	-1.67111	0.00725499	0.0186758	yes	down		maker-Fvb7-3-snap-gene-28.91	PREDICTED: heat shock protein 83 [Fragaria vesca subsp. vesca]	2.39701	4.44291e-186	7.89104e-184	yes	up
maker-Fvb1-1-augustus-gene-164.44	PREDICTED: probable mannitol dehydrogenase [Fragaria vesca subsp. vesca]	-4.36966	0.0185325	0.0430578	yes	down		maker-Fvb7-4-augustus-gene-14.46	PREDICTED: probable WRKY transcription factor 41 [Fragaria vesca subsp. vesca]	1.94278	2.02815e-07	1.03675e-06	yes	up
maker-Fvb7-1-augustus-gene-113.45	PREDICTED: uncharacterized protein LOC101297504 [Fragaria vesca subsp. vesca]	-2.50912	0.00885679	0.0223507	yes	down		augustus_masked-Fvb7-3-processed-gene-242.7	hypothetical protein RchiOBHm_Chr1g0315761 [Rosa chinensis]	1.99047	6.87401e-05	0.000255584	yes	up
MSTRG.14119	PREDICTED: uncharacterized protein LOC105349701 [Fragaria vesca subsp. vesca]	-2.22904	9.32e-15	8.46267e-14	yes	down		augustus_masked-Fvb5-4-processed-gene-217.11	PREDICTED: putative DNA-binding protein ESCAROLA [Fragaria vesca subsp. vesca]	4.2758	4.84933e-13	3.95905e-12	yes	up
maker-Fvb7-1-snap-gene-246.50	RecName: Full=Chalcone--flavonone isomerase 2; Short=Chalcone isomerase 2	-3.24958	0	0	yes	down		maker-Fvb6-2-snap-gene-290.50	quinone oxidoreductase [Fragaria x ananassa]	1.21295	1.22754e-59	4.46554e-58	yes	up
maker-Fvb5-4-augustus-gene-47.37	PREDICTED: alpha-mannosidase-like isoform X2 [Fragaria vesca subsp. vesca]	-1.1175	3.97e-15	3.68688e-14	yes	down		MSTRG.9200	PREDICTED: proline-rich receptor-like protein kinase PERK8 [Pyrus x bretschneideri]	1.07461	2.28625e-05	9.11731e-05	yes	up
snap_masked-Fvb6-1-processed-gene-87.18	PREDICTED: LOW QUALITY PROTEIN: protein ZINC INDUCED FACILITATOR-LIKE 1-like [Fragaria vesca subsp. vesca]	-1.84472	0.001434	0.00428324	yes	down		augustus_masked-Fvb3-3-processed-gene-92.8	putative sodium/calcium exchanger membrane region, EF-hand domain pair [Rosa chinensis]	3.03877	9.46534e-05	0.000344717	yes	up
maker-Fvb7-1-augustus-gene-118.41	PREDICTED: probable dimethyladenosine transferase isoform X1 [Fragaria vesca subsp. vesca]	-1.02218	2.52e-19	2.90286e-18	yes	down		maker-Fvb2-2-snap-gene-167.22	PREDICTED: BURP domain-containing protein 3-like [Fragaria vesca subsp. vesca]	2.38873	2.06213e-154	2.60879e-152	yes	up
maker-Fvb4-2-augustus-gene-86.37	PREDICTED: methyltransferase-like protein 13 [Fragaria vesca subsp. vesca]	-1.31403	2.71e-17	2.84131e-16	yes	down		maker-Fvb4-2-augustus-gene-40.39	PREDICTED: uncharacterized protein LOC101298512 [Fragaria vesca subsp. vesca]	1.63858	2.64807e-10	1.76905e-09	yes	up
augustus_masked-Fvb6-2-processed-gene-200.3	PREDICTED: uncharacterized protein LOC101303240 [Fragaria vesca subsp. vesca]	-1.15698	9.58e-08	5.07047e-07	yes	down		maker-Fvb4-1-augustus-gene-188.41	PREDICTED: 1,4-dihydroxy-2-naphthoyl-CoA synthase, peroxisomal isoform X1 [Fragaria vesca subsp. vesca]	1.15284	1.07998e-29	1.88525e-28	yes	up
augustus_masked-Fvb6-2-processed-gene-173.0	PREDICTED: UDP-glycosyltransferase 86A1-like [Fragaria vesca subsp. vesca]	-1.02106	0.0160734	0.0379636	yes	down		maker-Fvb1-3-augustus-gene-108.28	PREDICTED: transcription factor RAX3 [Fragaria vesca subsp. vesca]	2.64369	4.5088e-05	0.00017226	yes	up
snap_masked-Fvb5-4-processed-gene-1.31	PREDICTED: pentatricopeptide repeat-containing protein At4g18975, chloroplastic isoform X2 [Fragaria vesca subsp. vesca]	-1.04659	7.11e-23	9.61442e-22	yes	down		MSTRG.45774	PREDICTED: RING-H2 finger protein ATL3-like [Fragaria vesca subsp. vesca]	1.58707	2.45172e-09	1.51528e-08	yes	up
maker-Fvb6-4-augustus-gene-290.35	PREDICTED: ultraviolet-B receptor UVR8 [Fragaria vesca subsp. vesca]	-1.1273	1.83e-11	1.33753e-10	yes	down		maker-Fvb4-2-augustus-gene-1.51	PREDICTED: GEM-like protein 7 [Fragaria vesca subsp. vesca]	3.97306	1.57075e-05	6.38229e-05	yes	up
maker-Fvb5-2-augustus-gene-38.51	PREDICTED: quinolinate synthase, chloroplastic [Fragaria vesca subsp. vesca]	-1.40598	5.93e-09	3.54806e-08	yes	down		augustus_masked-Fvb5-1-processed-gene-37.7	PREDICTED: uncharacterized protein LOC101295235 [Fragaria vesca subsp. vesca]	1.98277	3.98072e-10	2.62181e-09	yes	up
maker-Fvb7-1-snap-gene-287.65	putative disease resistance protein RGA3 isoform X2 [Rosa chinensis]	-1.51478	0.000647277	0.00205983	yes	down		maker-Fvb4-4-augustus-gene-124.24	PREDICTED: stem-specific protein TSJT1 isoform X2 [Fragaria vesca subsp. vesca]	1.33764	1.01462e-89	6.06238e-88	yes	up
maker-Fvb7-2-augustus-gene-60.41	PREDICTED: SEC12-like protein 1 [Fragaria vesca subsp. vesca]	-1.23504	1.36e-32	2.58114e-31	yes	down		maker-Fvb6-1-augustus-gene-115.39	PREDICTED: dnaJ homolog subfamily B member 6 isoform X1 [Fragaria vesca subsp. vesca]	1.03729	8.38932e-57	2.88721e-55	yes	up
maker-Fvb2-4-augustus-gene-109.43	PREDICTED: pathogen-related protein-like [Fragaria vesca subsp. vesca]	-1.05171	4.71e-19	5.37212e-18	yes	down		augustus_masked-Fvb1-2-processed-gene-129.2	PREDICTED: uncharacterized protein At4g38062 [Fragaria vesca subsp. vesca]	1.87991	0.00147679	0.00440002	yes	up
augustus_masked-Fvb1-2-processed-gene-39.4	uncharacterized protein LOC112188576 [Rosa chinensis]	-4.99634	0.00640212	0.0166785	yes	down		maker-Fvb4-3-snap-gene-89.53	PREDICTED: DUF21 domain-containing protein At4g14240-like isoform X1 [Fragaria vesca subsp. vesca]	1.91441	0.0099726	0.0248515	yes	up
maker-Fvb7-1-snap-gene-259.49	PREDICTED: putative ABC1 protein At2g40090 [Fragaria vesca subsp. vesca]	-1.08932	7.39e-25	1.0803e-23	yes	down		augustus_masked-Fvb5-2-processed-gene-71.8	hypothetical protein RchiOBHm_Chr7g0182191 [Rosa chinensis]	1.11518	5.12008e-20	6.10642e-19	yes	up
maker-Fvb7-2-snap-gene-150.25	PREDICTED: receptor-like protein 12 [Fragaria vesca subsp. vesca]	-1.14617	1.08e-25	1.62844e-24	yes	down		MSTRG.6341	PREDICTED: factor of DNA methylation 3-like [Fragaria vesca subsp. vesca]	1.2291	1.65058e-10	1.1191e-09	yes	up
maker-Fvb2-4-snap-gene-228.62	PREDICTED: serine carboxypeptidase-like 7 isoform X1 [Fragaria vesca subsp. vesca]	-4.16145	0	0	yes	down		MSTRG.46173	PREDICTED: clustered mitochondria protein homolog [Fragaria vesca subsp. vesca]	1.15864	5.30684e-108	4.00249e-106	yes	up
maker-Fvb5-1-augustus-gene-73.42	PREDICTED: oligopeptide transporter 7 [Fragaria vesca subsp. vesca]	-2.01649	5.33e-65	2.13105e-63	yes	down		maker-Fvb3-4-snap-gene-60.41	PREDICTED: scarecrow-like protein 11 [Fragaria vesca subsp. vesca]	1.50007	6.34779e-20	7.52899e-19	yes	up
MSTRG.32768	PREDICTED: leucine-rich repeat extensin-like protein 4 isoform X1 [Pyrus x bretschneideri]	-1.01775	5.31e-63	2.06659e-61	yes	down		maker-Fvb5-3-augustus-gene-189.56	PREDICTED: LOW QUALITY PROTEIN: transcription factor MYB1R1 [Fragaria vesca subsp. vesca]	1.5059	3.03635e-94	1.95338e-92	yes	up
snap_masked-Fvb2-1-processed-gene-233.39	PREDICTED: bark storage protein A-like [Fragaria vesca subsp. vesca]	-3.46295	0.00449799	0.0121516	yes	down		augustus_masked-Fvb7-2-processed-gene-250.17	PREDICTED: uncharacterized protein LOC101305600 [Fragaria vesca subsp. vesca]	3.40233	5.222e-109	4.012e-107	yes	up
maker-Fvb2-4-augustus-gene-65.22	PREDICTED: bifunctional dihydrofolate reductase-thymidylate synthase-like [Fragaria vesca subsp. vesca]	-1.41093	2.29e-36	4.91185e-35	yes	down		maker-Fvb6-1-augustus-gene-191.39	PREDICTED: leucine-rich repeat receptor-like tyrosine-protein kinase At2g41820 [Fragaria vesca subsp. vesca]	1.10619	0.000259217	0.000881584	yes	up
maker-Fvb6-4-snap-gene-181.40	PREDICTED: protein CHLOROPLAST IMPORT APPARATUS 2-like isoform X1 [Fragaria vesca subsp. vesca]	-1.51873	7.98e-120	6.96039e-118	yes	down		snap_masked-Fvb2-1-processed-gene-233.17	PREDICTED: uncharacterized protein LOC105350612 [Fragaria vesca subsp. vesca]	3.86898	0.00555614	0.0146729	yes	up
maker-Fvb5-4-augustus-gene-50.50	PREDICTED: probable aquaporin NIP5-1 isoform X1 [Fragaria vesca subsp. vesca]	-1.68929	4.89e-36	1.03958e-34	yes	down		maker-Fvb7-3-snap-gene-40.96	PREDICTED: uncharacterized protein LOC101292941 [Fragaria vesca subsp. vesca]	2.045	0.000568586	0.00182888	yes	up
MSTRG.3197	protein DMR6-LIKE OXYGENASE 2-like [Rosa chinensis]	-1.0552	3.32e-52	1.04221e-50	yes	down		augustus_masked-Fvb3-1-processed-gene-316.8	PREDICTED: uncharacterized protein LOC101291127 [Fragaria vesca subsp. vesca]	1.65282	7.99977e-40	1.89743e-38	yes	up
maker-Fvb1-2-snap-gene-158.30	wall-associated receptor kinase-like 20 [Rosa chinensis]	-1.16249	4.04e-31	7.36759e-30	yes	down		augustus_masked-Fvb7-2-processed-gene-233.11	PREDICTED: 18.1 kDa class I heat shock protein-like [Fragaria vesca subsp. vesca]	1.14678	1.17885e-06	5.53758e-06	yes	up
maker-Fvb1-4-augustus-gene-154.25	PREDICTED: NAC domain-containing protein 2-like [Fragaria vesca subsp. vesca]	-1.52408	1.8e-118	1.54308e-116	yes	down		maker-Fvb6-4-augustus-gene-82.34	PREDICTED: uncharacterized protein LOC101312742 [Fragaria vesca subsp. vesca]	1.6016	5.13996e-32	9.6354e-31	yes	up
maker-Fvb1-3-augustus-gene-47.53	PREDICTED: 3-hydroxy-3-methylglutaryl-coenzyme A reductase 1-like [Fragaria vesca subsp. vesca]	-2.21656	8.01e-06	3.38833e-05	yes	down		maker-Fvb3-2-augustus-gene-47.49	PREDICTED: auxin-repressed 12.5 kDa protein [Fragaria vesca subsp. vesca]	2.58178	2.27692e-210	4.93411e-208	yes	up
snap_masked-Fvb5-1-processed-gene-5.30	PREDICTED: uncharacterized protein LOC105351402 [Fragaria vesca subsp. vesca]	-1.52653	2.34e-35	4.87202e-34	yes	down		maker-Fvb6-4-augustus-gene-312.41	protein DETOXIFICATION 40-like isoform X1 [Rosa chinensis]	2.59602	6.93444e-06	2.96343e-05	yes	up
maker-Fvb6-3-augustus-gene-386.34	PREDICTED: gibberellin receptor GID1C-like [Fragaria vesca subsp. vesca]	-1.32099	3.17e-16	3.13477e-15	yes	down		maker-Fvb6-2-snap-gene-50.22	gibberellin 3-oxidase [Fragaria x ananassa]	2.91584	0.00450998	0.0121811	yes	up
maker-Fvb6-1-augustus-gene-286.56	PREDICTED: endochitinase A-like [Fragaria vesca subsp. vesca]	-1.79717	1.69e-65	6.80257e-64	yes	down		maker-Fvb5-1-augustus-gene-100.45	PREDICTED: betaine aldehyde dehydrogenase 1, chloroplastic-like [Fragaria vesca subsp. vesca]	1.02615	5.19396e-47	1.4684e-45	yes	up
snap_masked-Fvb6-2-processed-gene-166.24	thaumatin-like protein, partial [Fragaria chiloensis]	-1.172	4.06e-18	4.41771e-17	yes	down		maker-Fvb7-3-augustus-gene-198.45	PREDICTED: uncharacterized protein LOC101298161 [Fragaria vesca subsp. vesca]	2.13359	0.00221783	0.00638872	yes	up
augustus_masked-Fvb6-3-processed-gene-363.5	PREDICTED: acid phosphatase 1 [Fragaria vesca subsp. vesca]	-1.41303	0.017598	0.0411612	yes	down		augustus_masked-Fvb1-1-processed-gene-155.2	PREDICTED: RING-H2 finger protein ATL52-like [Fragaria vesca subsp. vesca]	1.03128	1.14122e-09	7.25219e-09	yes	up
MSTRG.67113	PREDICTED: uncharacterized protein LOC101314695 [Fragaria vesca subsp. vesca]	-1.94512	1.57e-290	5.74772e-288	yes	down		maker-Fvb2-1-augustus-gene-256.72	PREDICTED: uncharacterized protein LOC101296348 [Fragaria vesca subsp. vesca]	1.78344	0.00738302	0.0189693	yes	up
maker-Fvb7-1-augustus-gene-177.37	PREDICTED: uncharacterized protein LOC105352840 [Fragaria vesca subsp. vesca]	-1.599	0.00551948	0.014588	yes	down		maker-Fvb2-1-snap-gene-15.49	--	1.22741	0.00168945	0.00497439	yes	up
MSTRG.28893	PREDICTED: leucine-rich repeat extensin-like protein 4 isoform X2 [Pyrus x bretschneideri]	-1.78215	0.00132841	0.00399231	yes	down		maker-Fvb6-1-augustus-gene-21.34	PREDICTED: probable ATP-dependent DNA helicase HFM1 [Fragaria vesca subsp. vesca]	3.37135	5.60993e-08	3.03683e-07	yes	up
maker-Fvb2-4-augustus-gene-47.22	PREDICTED: uncharacterized protein LOC101304939 isoform X1 [Fragaria vesca subsp. vesca]	-1.6935	0.00278434	0.00786233	yes	down		maker-Fvb5-1-snap-gene-16.75	hypothetical protein RchiOBHm_Chr7g0196851 [Rosa chinensis]	1.27311	0.000264331	0.000897596	yes	up
MSTRG.6912	PREDICTED: uncharacterized protein LOC101296107 [Fragaria vesca subsp. vesca]	-1.18034	8.53e-13	6.85614e-12	yes	down		maker-Fvb5-2-augustus-gene-47.46	PREDICTED: neurofilament medium polypeptide-like [Fragaria vesca subsp. vesca]	2.04068	3.49245e-48	1.01135e-46	yes	up
augustus_masked-Fvb4-3-processed-gene-293.1	PREDICTED: uncharacterized protein LOC101296092 [Fragaria vesca subsp. vesca]	-1.9067	7.79e-06	3.30511e-05	yes	down		maker-Fvb3-4-augustus-gene-273.48	PREDICTED: dynein light chain 1, cytoplasmic-like [Fragaria vesca subsp. vesca]	1.08197	6.26948e-23	8.48999e-22	yes	up
augustus_masked-Fvb7-4-processed-gene-104.3	PREDICTED: GDSL esterase/lipase At4g01130 isoform X2 [Fragaria vesca subsp. vesca]	-1.83401	4.6e-63	1.79246e-61	yes	down		augustus_masked-Fvb5-1-processed-gene-33.11	PREDICTED: NAD(P)H-quinone oxidoreductase subunit S, chloroplastic [Fragaria vesca subsp. vesca]	2.87638	2.55324e-43	6.6211e-42	yes	up
maker-Fvb1-2-augustus-gene-198.37	PREDICTED: uncharacterized protein LOC101298068 [Fragaria vesca subsp. vesca]	-2.23756	5e-61	1.86773e-59	yes	down		MSTRG.59023	PREDICTED: CBL-interacting serine/threonine-protein kinase 9 [Fragaria vesca subsp. vesca]	2.1507	4.77664e-93	2.9922e-91	yes	up
MSTRG.53914	PREDICTED: probable pyridoxal 5&apos;-phosphate synthase subunit PDX1 [Fragaria vesca subsp. vesca]	-1.81115	1.64e-12	1.28847e-11	yes	down		maker-Fvb3-2-augustus-gene-30.64	PREDICTED: C2 and GRAM domain-containing protein At1g03370 [Fragaria vesca subsp. vesca]	1.1675	1.11148e-09	7.07167e-09	yes	up
maker-Fvb5-3-augustus-gene-219.32	PREDICTED: uncharacterized protein LOC101303763 [Fragaria vesca subsp. vesca]	-1.60787	3.67e-05	0.000141877	yes	down		augustus_masked-Fvb1-3-processed-gene-104.3	PREDICTED: uncharacterized protein LOC105352032 [Fragaria vesca subsp. vesca]	4.78969	1.72304e-07	8.88303e-07	yes	up
snap_masked-Fvb4-2-processed-gene-57.15	pleiotropic drug resistance protein 2-like [Rosa chinensis]	-2.85339	2.35e-09	1.45217e-08	yes	down		maker-Fvb7-2-augustus-gene-14.33	PREDICTED: cinnamoyl-CoA reductase 1-like [Fragaria vesca subsp. vesca]	2.83882	2.13768e-38	4.86394e-37	yes	up
maker-Fvb2-2-snap-gene-182.34	PREDICTED: uncharacterized protein LOC101314826 [Fragaria vesca subsp. vesca]	-2.87145	0.000424698	0.0013958	yes	down		augustus_masked-Fvb4-3-processed-gene-15.6	PREDICTED: aldehyde dehydrogenase family 2 member B7, mitochondrial-like [Fragaria vesca subsp. vesca]	1.61037	1.85306e-10	1.2516e-09	yes	up
maker-Fvb3-2-snap-gene-305.62	PREDICTED: uncharacterized protein LOC101295497 [Fragaria vesca subsp. vesca]	-1.67242	1e-14	9.07816e-14	yes	down		maker-Fvb7-1-snap-gene-155.35	PREDICTED: brefeldin A-inhibited guanine nucleotide-exchange protein 2-like [Fragaria vesca subsp. vesca]	1.00582	3.571e-45	9.64703e-44	yes	up
augustus_masked-Fvb5-1-processed-gene-42.16	PREDICTED: pentatricopeptide repeat-containing protein At3g48250, chloroplastic [Fragaria vesca subsp. vesca]	-1.17078	4.07e-08	2.23251e-07	yes	down		augustus_masked-Fvb6-4-processed-gene-1.12	PREDICTED: probable galacturonosyltransferase-like 10 [Fragaria vesca subsp. vesca]	3.5277	9.81923e-17	9.99365e-16	yes	up
maker-Fvb4-2-augustus-gene-83.58	PREDICTED: tRNA pseudouridine synthase-like 1 [Fragaria vesca subsp. vesca]	-2.00393	0.000226174	0.000776879	yes	down		snap_masked-Fvb2-1-processed-gene-187.30	PREDICTED: uncharacterized protein LOC105349822 [Fragaria vesca subsp. vesca]	3.77737	3.09115e-25	4.58715e-24	yes	up
augustus_masked-Fvb6-4-processed-gene-173.5	hypothetical protein RchiOBHm_Chr3g0481271 [Rosa chinensis]	-1.24667	0.00329268	0.00915228	yes	down		maker-Fvb1-4-augustus-gene-43.68	PREDICTED: pectinesterase/pectinesterase inhibitor PPE8B-like [Fragaria vesca subsp. vesca]	1.66468	2.98427e-80	1.5195e-78	yes	up
maker-Fvb1-3-augustus-gene-235.31	PREDICTED: putative quinone-oxidoreductase homolog, chloroplastic [Fragaria vesca subsp. vesca]	-1.14496	5.43e-54	1.76923e-52	yes	down		maker-Fvb6-1-snap-gene-324.56	PREDICTED: probable linoleate 9S-lipoxygenase 5 [Fragaria vesca subsp. vesca]	1.96033	9.64274e-255	2.94091e-252	yes	up
maker-Fvb4-3-augustus-gene-169.35	PREDICTED: DEAD-box ATP-dependent RNA helicase 58, chloroplastic isoform X1 [Fragaria vesca subsp. vesca]	-1.12266	2.05e-20	2.4881e-19	yes	down		maker-Fvb4-1-snap-gene-137.52	PREDICTED: very-long-chain 3-oxoacyl-CoA reductase 1-like [Fragaria vesca subsp. vesca]	2.17244	0.00107611	0.00329095	yes	up
maker-Fvb2-4-augustus-gene-129.35	PREDICTED: nucleolar complex protein 4 homolog [Fragaria vesca subsp. vesca]	-1.19377	5.22e-10	3.40759e-09	yes	down		maker-Fvb7-1-augustus-gene-306.52	PREDICTED: heat shock protein 83 [Fragaria vesca subsp. vesca]	1.78342	2.73934e-233	7.47385e-231	yes	up
maker-Fvb6-4-augustus-gene-276.40	PREDICTED: probable plastid-lipid-associated protein 10, chloroplastic [Fragaria vesca subsp. vesca]	-1.03051	1.35e-31	2.49069e-30	yes	down		augustus_masked-Fvb7-2-processed-gene-183.16	PREDICTED: dehydration-responsive protein RD22-like [Fragaria vesca subsp. vesca]	4.13235	2.94034e-16	2.90795e-15	yes	up
maker-Fvb6-1-augustus-gene-168.41	PREDICTED: AP2-like ethylene-responsive transcription factor At1g16060 [Fragaria vesca subsp. vesca]	-1.32432	0.00461898	0.0124429	yes	down		snap_masked-Fvb6-1-processed-gene-32.43	PREDICTED: probable receptor-like protein kinase At5g15080 [Fragaria vesca subsp. vesca]	1.12805	2.18789e-16	2.17973e-15	yes	up
maker-Fvb7-3-augustus-gene-48.59	PREDICTED: uncharacterized protein LOC101312487 [Fragaria vesca subsp. vesca]	-1.73053	1.02e-45	2.78915e-44	yes	down		maker-Fvb7-2-snap-gene-204.60	PREDICTED: NAC domain-containing protein 89-like [Fragaria vesca subsp. vesca]	1.87863	1.67667e-13	1.41265e-12	yes	up
maker-Fvb1-3-snap-gene-140.28	PREDICTED: low affinity sulfate transporter 3-like [Fragaria vesca subsp. vesca]	-2.28055	1.11e-07	5.81718e-07	yes	down		maker-Fvb6-1-augustus-gene-228.32	PREDICTED: transcription repressor OFP13 [Fragaria vesca subsp. vesca]	2.17488	2.83829e-53	9.10717e-52	yes	up
MSTRG.56891	PREDICTED: 3-oxoacyl-[acyl-carrier-protein] synthase II, chloroplastic-like isoform X3 [Fragaria vesca subsp. vesca]	-1.0394	0.00236297	0.00676935	yes	down		maker-Fvb7-3-snap-gene-46.65	PREDICTED: ethylene-responsive transcription factor ERF106-like [Fragaria vesca subsp. vesca]	4.17459	4.44172e-11	3.14292e-10	yes	up
maker-Fvb5-1-augustus-gene-297.46	PREDICTED: lethal(2) giant larvae protein-like [Pyrus x bretschneideri]	-1.08188	1.52e-08	8.71253e-08	yes	down		maker-Fvb6-1-snap-gene-72.55	PREDICTED: zinc finger CCCH domain-containing protein 18 isoform X1 [Fragaria vesca subsp. vesca]	2.33559	6.2502e-225	1.55964e-222	yes	up
maker-Fvb6-2-augustus-gene-312.48	PREDICTED: ninja-family protein AFP3-like isoform X1 [Fragaria vesca subsp. vesca]	-2.66523	5.74e-36	1.21696e-34	yes	down		MSTRG.60768	PREDICTED: glycosyltransferase family protein 64 protein C5 [Fragaria vesca subsp. vesca]	2.08515	3.20319e-72	1.4428e-70	yes	up
maker-Fvb7-4-snap-gene-6.59	PREDICTED: RING-H2 zinc finger protein RHA4a-like [Fragaria vesca subsp. vesca]	-1.52877	0.00415933	0.011329	yes	down		maker-Fvb3-1-snap-gene-215.53	PREDICTED: uncharacterized protein LOC105350456 [Fragaria vesca subsp. vesca]	2.11134	8.02948e-06	3.39599e-05	yes	up
maker-Fvb1-4-augustus-gene-157.32	PREDICTED: fatty acid amide hydrolase-like isoform X2 [Fragaria vesca subsp. vesca]	-1.07183	4.35e-10	2.85361e-09	yes	down		maker-Fvb3-2-augustus-gene-71.31	PREDICTED: uncharacterized protein LOC101310385 [Fragaria vesca subsp. vesca]	1.97896	2.69007e-51	8.31069e-50	yes	up
maker-Fvb2-2-augustus-gene-25.44	PREDICTED: acyl-protein thioesterase 2-like isoform X1 [Fragaria vesca subsp. vesca]	-1.05223	8.52e-08	4.53348e-07	yes	down		MSTRG.18842	PREDICTED: disease resistance protein RPM1-like [Fragaria vesca subsp. vesca]	2.72427	3.24081e-08	1.79996e-07	yes	up
augustus_masked-Fvb6-1-processed-gene-292.3	PREDICTED: 26S proteasome non-ATPase regulatory subunit 7 homolog A [Fragaria vesca subsp. vesca]	-1.90562	0.0097503	0.0243592	yes	down		augustus_masked-Fvb1-3-processed-gene-96.11	PREDICTED: cytochrome P450 81E8-like [Fragaria vesca subsp. vesca]	1.62849	2.32441e-18	2.56265e-17	yes	up
maker-Fvb2-2-augustus-gene-174.36	PREDICTED: very-long-chain enoyl-CoA reductase-like [Fragaria vesca subsp. vesca]	-1.20735	2.02e-12	1.57761e-11	yes	down		augustus_masked-Fvb4-3-processed-gene-92.8	hypothetical protein RchiOBHm_Chr4g0433081 [Rosa chinensis]	1.28177	0.000329828	0.00110281	yes	up
maker-Fvb4-2-augustus-gene-63.38	PREDICTED: protein SDA1 homolog [Fragaria vesca subsp. vesca]	-1.05657	1.65e-10	1.12051e-09	yes	down		MSTRG.21194	uncharacterized protein LOC112199546 [Rosa chinensis]	2.54274	0.00741809	0.0190518	yes	up
maker-Fvb2-4-augustus-gene-65.21	TMV resistance protein N-like isoform X1 [Rosa chinensis]	-1.21474	6.86e-05	0.000255165	yes	down		maker-Fvb2-4-snap-gene-239.73	PREDICTED: uncharacterized protein LOC101300317 [Fragaria vesca subsp. vesca]	1.93646	6.19895e-08	3.34111e-07	yes	up
maker-Fvb5-1-augustus-gene-82.45	PREDICTED: enolase 1, chloroplastic [Fragaria vesca subsp. vesca]	-1.4158	2.06e-11	1.49831e-10	yes	down		MSTRG.2778	--	1.39879	5.18385e-53	1.65105e-51	yes	up
maker-Fvb5-3-augustus-gene-261.50	PREDICTED: uncharacterized protein LOC101309059 [Fragaria vesca subsp. vesca]	-1.50484	0.00228056	0.00655503	yes	down		MSTRG.45810	PREDICTED: FAS-associated factor 2 [Fragaria vesca subsp. vesca]	1.43405	1.65173e-08	9.46396e-08	yes	up
maker-Fvb5-4-augustus-gene-29.72	PREDICTED: RING-H2 finger protein ATL48 [Fragaria vesca subsp. vesca]	-1.39667	4.64e-16	4.53101e-15	yes	down		snap_masked-Fvb1-4-processed-gene-61.27	PREDICTED: dehydrin Xero 1-like [Fragaria vesca subsp. vesca]	1.93036	2.79011e-09	1.7175e-08	yes	up
augustus_masked-Fvb6-3-processed-gene-270.7	PREDICTED: uncharacterized protein LOC105352154 [Fragaria vesca subsp. vesca]	-1.08006	1.56e-34	3.17069e-33	yes	down		maker-Fvb6-2-augustus-gene-335.40	PREDICTED: linolenate hydroperoxide lyase, chloroplastic [Fragaria vesca subsp. vesca]	1.80053	1.84988e-122	1.64763e-120	yes	up
maker-Fvb6-3-snap-gene-300.57	PREDICTED: UDP-glycosyltransferase 73C1-like [Fragaria vesca subsp. vesca]	-1.10844	4.68e-09	2.82435e-08	yes	down		maker-Fvb5-4-augustus-gene-22.31	PREDICTED: probable beta-1,3-galactosyltransferase 11 [Fragaria vesca subsp. vesca]	1.36649	1.66351e-05	6.74102e-05	yes	up
maker-Fvb7-3-augustus-gene-188.27	PREDICTED: uncharacterized protein LOC101314695 [Fragaria vesca subsp. vesca]	-1.40855	1.51e-93	9.64384e-92	yes	down		augustus_masked-Fvb6-4-processed-gene-213.2	PREDICTED: F-box/kelch-repeat protein At3g06240-like [Fragaria vesca subsp. vesca]	1.5174	2.05299e-06	9.3561e-06	yes	up
augustus_masked-Fvb6-4-processed-gene-204.10	PREDICTED: rac-like GTP-binding protein RAC2 [Fragaria vesca subsp. vesca]	-1.28716	0.0015464	0.00458704	yes	down		maker-Fvb6-2-augustus-gene-18.39	PREDICTED: auxin-repressed 12.5 kDa protein isoform X1 [Fragaria vesca subsp. vesca]	2.38516	3.49344e-129	3.33094e-127	yes	up
maker-Fvb5-1-augustus-gene-138.44	PREDICTED: uncharacterized protein At1g03900-like [Malus domestica]	-1.54844	8.59e-20	1.01035e-18	yes	down		augustus_masked-Fvb6-1-processed-gene-300.3	PREDICTED: CASP-like protein 4B1 [Fragaria vesca subsp. vesca]	2.68611	5.44027e-28	8.95972e-27	yes	up
maker-Fvb6-2-snap-gene-198.67	PREDICTED: protein NRT1/ PTR FAMILY 2.8 [Fragaria vesca subsp. vesca]	-1.14431	1.82e-17	1.91476e-16	yes	down		maker-Fvb7-2-snap-gene-176.61	PREDICTED: proline-rich protein HaeIII subfamily 1-like [Fragaria vesca subsp. vesca]	1.01786	6.88181e-46	1.89184e-44	yes	up
maker-Fvb1-3-augustus-gene-73.55	PREDICTED: putative glucose-6-phosphate 1-epimerase [Fragaria vesca subsp. vesca]	-1.97391	2.88e-83	1.54735e-81	yes	down		MSTRG.53824	PREDICTED: putative receptor protein kinase ZmPK1 [Fragaria vesca subsp. vesca]	1.04223	3.54971e-37	7.78915e-36	yes	up
maker-Fvb2-3-augustus-gene-16.38	flavonol synthase [Fragaria x ananassa]	-5.08651	0	0	yes	down		augustus_masked-Fvb3-3-processed-gene-95.10	PREDICTED: homeobox-leucine zipper protein ATHB-52 [Fragaria vesca subsp. vesca]	3.13656	7.24463e-06	3.08725e-05	yes	up
maker-Fvb4-2-augustus-gene-214.21	PREDICTED: probable leucine-rich repeat receptor-like protein kinase At5g63930 [Fragaria vesca subsp. vesca]	-1.14076	1.29e-05	5.3016e-05	yes	down		maker-Fvb6-1-augustus-gene-303.35	PREDICTED: prosaposin-like [Fragaria vesca subsp. vesca]	2.21737	6.38772e-16	6.1989e-15	yes	up
maker-Fvb6-2-augustus-gene-283.71	PREDICTED: succinate dehydrogenase [ubiquinone] iron-sulfur subunit 2, mitochondrial-like [Fragaria vesca subsp. vesca]	-1.00917	2.61e-29	4.50406e-28	yes	down		snap_masked-Fvb6-1-processed-gene-196.24	PREDICTED: cleavage stimulating factor 64-like [Fragaria vesca subsp. vesca]	1.42203	1.43328e-06	6.6647e-06	yes	up
MSTRG.41423	PREDICTED: transmembrane protein DDB_G0273707/DDB_G0273361 [Fragaria vesca subsp. vesca]	-1.57556	5.48e-181	9.22681e-179	yes	down		augustus_masked-Fvb6-4-processed-gene-142.4	PREDICTED: protein YLS9-like [Fragaria vesca subsp. vesca]	1.21546	3.6399e-13	2.99569e-12	yes	up
maker-Fvb5-4-snap-gene-2.51	PREDICTED: alternative NAD(P)H-ubiquinone oxidoreductase C1, chloroplastic/mitochondrial [Fragaria vesca subsp. vesca]	-2.7956	2.38e-15	2.24471e-14	yes	down		augustus_masked-Fvb2-3-processed-gene-180.0	allene oxide synthase 3-like [Rosa chinensis]	4.28963	0.00326456	0.00908359	yes	up
maker-Fvb6-1-augustus-gene-312.44	PREDICTED: DEAD-box ATP-dependent RNA helicase 3, chloroplastic [Fragaria vesca subsp. vesca]	-1.38394	2.36e-141	2.6228e-139	yes	down		maker-Fvb5-4-augustus-gene-101.30	PREDICTED: uncharacterized protein LOC101304099 [Fragaria vesca subsp. vesca]	1.36111	1.69093e-17	1.78516e-16	yes	up
augustus_masked-Fvb7-4-processed-gene-35.13	PREDICTED: ethylene-responsive transcription factor 2-like [Fragaria vesca subsp. vesca]	-1.06038	5.21e-17	5.36415e-16	yes	down		maker-Fvb3-1-augustus-gene-224.49	PREDICTED: C2 domain-containing protein At1g53590 isoform X1 [Fragaria vesca subsp. vesca]	1.65295	1.62243e-38	3.70366e-37	yes	up
maker-Fvb3-2-augustus-gene-47.55	PREDICTED: squamosa promoter-binding-like protein 3 [Fragaria vesca subsp. vesca]	-2.04514	1.69e-45	4.59632e-44	yes	down		augustus_masked-Fvb5-2-processed-gene-206.7	disease resistance protein RPM1 [Prunus persica]	1.21982	0.0214744	0.0490189	yes	up
maker-Fvb5-1-augustus-gene-178.53	PREDICTED: psbP domain-containing protein 3, chloroplastic [Fragaria vesca subsp. vesca]	-1.17323	9.73e-45	2.59747e-43	yes	down		maker-Fvb4-4-snap-gene-59.46	PREDICTED: inorganic phosphate transporter 2-1, chloroplastic [Fragaria vesca subsp. vesca]	1.5701	4.58945e-91	2.78631e-89	yes	up
maker-Fvb3-2-augustus-gene-51.45	PREDICTED: protein kinase PINOID [Fragaria vesca subsp. vesca]	-2.3266	4.37e-06	1.91745e-05	yes	down		MSTRG.31300	putative transcription factor interactor and regulator CCHC(Zn) family [Rosa chinensis]	1.86587	0.00523011	0.0139031	yes	up
maker-Fvb2-3-snap-gene-182.47	B3 domain-containing protein Os01g0723500-like isoform X2 [Rosa chinensis]	-1.02533	4.1e-13	3.36113e-12	yes	down		maker-Fvb6-1-snap-gene-273.60	PREDICTED: L-type lectin-domain containing receptor kinase S.4-like [Fragaria vesca subsp. vesca]	2.14759	1.03419e-12	8.25064e-12	yes	up
MSTRG.65421	major facilitator superfamily domain-containing protein 12-like isoform X2 [Rosa chinensis]	-1.21746	6.44e-18	6.94825e-17	yes	down		augustus_masked-Fvb3-4-processed-gene-18.1	PREDICTED: G-type lectin S-receptor-like serine/threonine-protein kinase RLK1 [Fragaria vesca subsp. vesca]	1.1361	0.000655869	0.00208549	yes	up
maker-Fvb3-3-snap-gene-219.30	PREDICTED: ferritin-4, chloroplastic [Fragaria vesca subsp. vesca]	-1.23757	6.11e-118	5.17491e-116	yes	down		maker-Fvb6-3-snap-gene-183.28	PREDICTED: probable alpha,alpha-trehalose-phosphate synthase [UDP-forming] 7 [Fragaria vesca subsp. vesca]	1.54435	0.0190709	0.0441748	yes	up
augustus_masked-Fvb2-1-processed-gene-172.7	flavonol synthase [Fragaria x ananassa]	-4.64481	3.69e-48	1.0648e-46	yes	down		augustus_masked-Fvb7-4-processed-gene-233.7	PREDICTED: uncharacterized protein LOC105352789 [Fragaria vesca subsp. vesca]	1.11078	0.000348413	0.0011607	yes	up
maker-Fvb1-2-snap-gene-192.35	PREDICTED: ultraviolet-B receptor UVR8 isoform X1 [Fragaria vesca subsp. vesca]	-1.1645	5.22e-24	7.39373e-23	yes	down		augustus_masked-Fvb5-1-processed-gene-14.12	PREDICTED: BTB/POZ domain-containing protein At5g41330 [Fragaria vesca subsp. vesca]	2.65975	1.58338e-35	3.31234e-34	yes	up
maker-Fvb6-3-augustus-gene-319.41	PREDICTED: translation factor GUF1 homolog, chloroplastic [Fragaria vesca subsp. vesca]	-1.09624	7.05e-100	4.80634e-98	yes	down		snap_masked-Fvb4-2-processed-gene-13.21	PREDICTED: probable alpha,alpha-trehalose-phosphate synthase [UDP-forming] 10 [Fragaria vesca subsp. vesca]	1.0288	1.13666e-19	1.32868e-18	yes	up
maker-Fvb6-3-snap-gene-44.65	PREDICTED: ATP-dependent zinc metalloprotease FTSH 9, chloroplastic [Fragaria vesca subsp. vesca]	-1.04444	1.57e-63	6.13775e-62	yes	down		augustus_masked-Fvb4-1-processed-gene-199.24	PREDICTED: exocyst complex component EXO70B1-like [Fragaria vesca subsp. vesca]	1.23094	0.00575032	0.0151271	yes	up
augustus_masked-Fvb6-2-processed-gene-324.11	PREDICTED: pentatricopeptide repeat-containing protein At1g03540 [Fragaria vesca subsp. vesca]	-1.02195	0.0008812	0.00273863	yes	down		maker-Fvb6-2-augustus-gene-270.47	PREDICTED: calreticulin-3-like [Fragaria vesca subsp. vesca]	1.04427	6.89712e-47	1.94686e-45	yes	up
MSTRG.12176	PREDICTED: nucleosome assembly protein 1;2-like [Fragaria vesca subsp. vesca]	-1.4921	4.35e-60	1.59113e-58	yes	down		maker-Fvb4-1-augustus-gene-180.31	PREDICTED: auxin efflux carrier component 3-like [Fragaria vesca subsp. vesca]	1.76949	6.30292e-63	2.45137e-61	yes	up
maker-Fvb7-2-snap-gene-317.66	PREDICTED: S-type anion channel SLAH2-like isoform X3 [Fragaria vesca subsp. vesca]	-1.56728	3.25e-44	8.57863e-43	yes	down		maker-Fvb6-3-augustus-gene-285.37	PREDICTED: glucomannan 4-beta-mannosyltransferase 9-like [Fragaria vesca subsp. vesca]	1.43807	0.0120663	0.0294277	yes	up
MSTRG.63047	PREDICTED: chalcone--flavonone isomerase 1 [Fragaria vesca subsp. vesca]	-2.69695	2.08e-306	8.83671e-304	yes	down		augustus_masked-Fvb4-2-processed-gene-10.10	PREDICTED: myosin heavy chain kinase B [Fragaria vesca subsp. vesca]	3.71999	2.67041e-57	9.31058e-56	yes	up
maker-Fvb2-2-snap-gene-48.83	PREDICTED: desiccation-related protein PCC13-62-like [Fragaria vesca subsp. vesca]	-1.14137	4.18e-11	2.96083e-10	yes	down		maker-Fvb5-4-augustus-gene-35.46	PREDICTED: uncharacterized protein LOC101311572 [Fragaria vesca subsp. vesca]	1.71291	6.12604e-33	1.17939e-31	yes	up
maker-Fvb3-4-augustus-gene-152.25	PREDICTED: poly [ADP-ribose] polymerase 3 [Fragaria vesca subsp. vesca]	-1.67215	1.26e-18	1.41266e-17	yes	down		maker-Fvb3-3-augustus-gene-11.40	PREDICTED: probable glycosyltransferase At3g07620 [Fragaria vesca subsp. vesca]	3.13686	1.18149e-14	1.06573e-13	yes	up
maker-Fvb6-2-augustus-gene-27.55	PREDICTED: midasin isoform X2 [Fragaria vesca subsp. vesca]	-1.18361	0.0152687	0.0362916	yes	down		maker-Fvb7-1-augustus-gene-252.44	PREDICTED: ARF guanine-nucleotide exchange factor GNOM-like [Fragaria vesca subsp. vesca]	1.08028	5.9623e-25	8.74468e-24	yes	up
augustus_masked-Fvb6-3-processed-gene-264.1	PREDICTED: aspartic proteinase nepenthesin-2 [Fragaria vesca subsp. vesca]	-2.10045	1.08e-30	1.94753e-29	yes	down		maker-Fvb3-2-augustus-gene-42.30	PREDICTED: uncharacterized protein LOC101293173 [Fragaria vesca subsp. vesca]	1.10272	0.00644794	0.0167863	yes	up
maker-Fvb1-2-augustus-gene-155.29	protein SDA1 homolog [Rosa chinensis]	-1.09458	7.49e-68	3.14672e-66	yes	down		maker-Fvb7-1-snap-gene-19.47	PREDICTED: CSC1-like protein At3g54510 isoform X1 [Fragaria vesca subsp. vesca]	1.63088	0.0031616	0.00882175	yes	up
maker-Fvb6-2-augustus-gene-182.39	PREDICTED: zinc finger CCCH domain-containing protein 21-like [Fragaria vesca subsp. vesca]	-1.32575	2.01e-27	3.23816e-26	yes	down		maker-Fvb1-3-augustus-gene-82.38	PREDICTED: oxygen-evolving enhancer protein 1, chloroplastic [Fragaria vesca subsp. vesca]	1.35981	6.88704e-169	1.03113e-166	yes	up
MSTRG.36455	--	-2.11418	0	0	yes	down		maker-Fvb6-1-snap-gene-273.69	PREDICTED: L-type lectin-domain containing receptor kinase S.4-like [Fragaria vesca subsp. vesca]	1.54864	5.16728e-12	3.91713e-11	yes	up
MSTRG.57236	PREDICTED: pentatricopeptide repeat-containing protein At5g65560-like [Fragaria vesca subsp. vesca]	-1.00476	1.44e-09	9.058e-09	yes	down		augustus_masked-Fvb1-4-processed-gene-185.6	PREDICTED: aspartic proteinase PCS1 [Fragaria vesca subsp. vesca]	2.06278	5.45055e-08	2.9532e-07	yes	up
maker-Fvb6-1-augustus-gene-335.39	PREDICTED: histidine-containing phosphotransfer protein 1-like [Fragaria vesca subsp. vesca]	-1.05368	6.55e-27	1.03635e-25	yes	down		augustus_masked-Fvb1-1-processed-gene-270.2	PREDICTED: CBL-interacting serine/threonine-protein kinase 6 [Fragaria vesca subsp. vesca]	1.52779	1.39106e-154	1.76229e-152	yes	up
augustus_masked-Fvb2-4-processed-gene-257.12	PREDICTED: legumin A-like [Fragaria vesca subsp. vesca]	-1.26074	5.91e-21	7.3631e-20	yes	down		augustus_masked-Fvb5-2-processed-gene-38.11	PREDICTED: probable pectate lyase 18 [Fragaria vesca subsp. vesca]	1.12014	1.14954e-42	2.92244e-41	yes	up
maker-Fvb6-1-snap-gene-104.74	PREDICTED: uncharacterized protein C23H3.12c [Fragaria vesca subsp. vesca]	-1.26632	0.00881613	0.0222618	yes	down		MSTRG.15119	PREDICTED: uncharacterized protein LOC105349549 [Fragaria vesca subsp. vesca]	1.26752	7.37466e-12	5.52526e-11	yes	up
augustus_masked-Fvb2-2-processed-gene-47.18	PREDICTED: translocator protein homolog [Fragaria vesca subsp. vesca]	-1.59514	3.34e-19	3.8383e-18	yes	down		maker-Fvb7-1-augustus-gene-126.28	PREDICTED: ras-related protein RABH1b [Fragaria vesca subsp. vesca]	1.36053	0.0059799	0.0156768	yes	up
maker-Fvb3-4-augustus-gene-205.43	PREDICTED: B-box zinc finger protein 22 [Fragaria vesca subsp. vesca]	-2.31021	8.33e-139	9.04982e-137	yes	down		maker-Fvb5-2-augustus-gene-217.16	PREDICTED: beta carbonic anhydrase 5, chloroplastic-like isoform X1 [Fragaria vesca subsp. vesca]	1.124	3.10873e-20	3.75006e-19	yes	up
maker-Fvb6-2-augustus-gene-184.38	PREDICTED: protein S-acyltransferase 10-like [Fragaria vesca subsp. vesca]	-1.02375	8.09e-43	2.0704e-41	yes	down		augustus_masked-Fvb5-2-processed-gene-185.0	PREDICTED: U-box domain-containing protein 16 [Fragaria vesca subsp. vesca]	1.8903	4.76181e-16	4.64845e-15	yes	up
MSTRG.40919	PREDICTED: ubiquitin fusion degradation protein 1 homolog [Fragaria vesca subsp. vesca]	-1.66934	2.53e-12	1.9611e-11	yes	down		maker-Fvb7-1-augustus-gene-198.29	PREDICTED: anthocyanidin reductase-like [Fragaria vesca subsp. vesca]	1.49411	0.000233604	0.000800668	yes	up
maker-Fvb7-3-augustus-gene-5.42	PREDICTED: homeobox-leucine zipper protein HDG1 isoform X1 [Fragaria vesca subsp. vesca]	-2.24897	0.00925145	0.0232398	yes	down		maker-Fvb1-3-augustus-gene-64.39	PREDICTED: histone H1 [Fragaria vesca subsp. vesca]	1.14836	7.40257e-52	2.3074e-50	yes	up
augustus_masked-Fvb2-3-processed-gene-72.4	PREDICTED: pentatricopeptide repeat-containing protein At1g77405 [Fragaria vesca subsp. vesca]	-1.74724	1.17e-11	8.68814e-11	yes	down		maker-Fvb6-3-augustus-gene-337.26	PREDICTED: L-type lectin-domain containing receptor kinase S.4-like [Fragaria vesca subsp. vesca]	1.08183	0.00136457	0.00409156	yes	up
augustus_masked-Fvb3-1-processed-gene-7.3	PREDICTED: DEAD-box ATP-dependent RNA helicase 37-like [Fragaria vesca subsp. vesca]	-1.15798	1.56e-40	3.75463e-39	yes	down		maker-Fvb2-2-snap-gene-144.20	PREDICTED: protein TPX2 isoform X2 [Fragaria vesca subsp. vesca]	1.8083	0.0206428	0.0473691	yes	up
augustus_masked-Fvb5-3-processed-gene-261.10	PREDICTED: F-box/LRR-repeat protein At3g59190-like isoform X1 [Fragaria vesca subsp. vesca]	-1.23618	0.00884046	0.0223153	yes	down		maker-Fvb6-3-augustus-gene-412.55	PREDICTED: TMV resistance protein N-like isoform X1 [Fragaria vesca subsp. vesca]	3.2709	1.24773e-10	8.52729e-10	yes	up
maker-Fvb6-2-augustus-gene-230.64	PREDICTED: galactinol synthase 2-like [Fragaria vesca subsp. vesca]	-2.18068	0.00029867	0.0010049	yes	down		maker-Fvb6-4-augustus-gene-316.47	PREDICTED: protein CHROMATIN REMODELING 20 [Fragaria vesca subsp. vesca]	4.42846	1.83535e-14	1.63341e-13	yes	up
maker-Fvb7-2-snap-gene-310.73	PREDICTED: heat stress transcription factor B-2a [Fragaria vesca subsp. vesca]	-1.26266	1.93e-07	9.91407e-07	yes	down		snap_masked-Fvb6-1-processed-gene-330.45	PREDICTED: protein YLS9-like [Fragaria vesca subsp. vesca]	1.59841	0.000329579	0.00110201	yes	up
maker-Fvb2-1-snap-gene-131.45	uncharacterized protein LOC112179163 [Rosa chinensis]	-1.02315	6.79e-36	1.43744e-34	yes	down		maker-Fvb2-4-snap-gene-64.29	PREDICTED: uncharacterized protein LOC105349549 [Fragaria vesca subsp. vesca]	1.26752	7.37466e-12	5.52526e-11	yes	up
maker-Fvb4-3-augustus-gene-181.33	PREDICTED: uncharacterized protein LOC101300050 [Fragaria vesca subsp. vesca]	-1.18664	0.0109582	0.027017	yes	down		maker-Fvb2-4-augustus-gene-151.44	PREDICTED: probable pectate lyase 20 [Fragaria vesca subsp. vesca]	1.35991	0.00013038	0.00046494	yes	up
augustus_masked-Fvb2-2-processed-gene-72.13	glutathione gamma-glutamylcysteinyltransferase 3-like isoform X2 [Rosa chinensis]	-1.10662	1.01e-13	8.67268e-13	yes	down		augustus_masked-Fvb3-3-processed-gene-225.1	PREDICTED: 3-ketoacyl-CoA synthase 12 [Fragaria vesca subsp. vesca]	1.22349	9.76465e-51	2.97909e-49	yes	up
maker-Fvb7-2-snap-gene-247.70	cation/H(+) antiporter 15-like [Rosa chinensis]	-1.78412	0.00458044	0.012349	yes	down		augustus_masked-Fvb5-2-processed-gene-136.8	PREDICTED: auxin-induced protein 15A-like [Fragaria vesca subsp. vesca]	1.93392	1.89129e-12	1.4794e-11	yes	up
maker-Fvb7-2-snap-gene-253.101	PREDICTED: SET and MYND domain-containing protein 4 [Fragaria vesca subsp. vesca]	-1.20053	2.47e-62	9.49135e-61	yes	down		maker-Fvb7-1-augustus-gene-217.32	PREDICTED: patatin-like protein 6 [Fragaria vesca subsp. vesca]	1.23214	2.24115e-07	1.13927e-06	yes	up
maker-Fvb5-1-augustus-gene-3.52	PREDICTED: protein ODORANT1 [Fragaria vesca subsp. vesca]	-1.19527	0.000643994	0.00205061	yes	down		MSTRG.12703	AUX1 [Fragaria x ananassa]	1.7101	2.77709e-49	8.22065e-48	yes	up
maker-Fvb6-3-augustus-gene-342.50	PREDICTED: uncharacterized protein LOC101299878 [Fragaria vesca subsp. vesca]	-1.36813	1.02e-17	1.09083e-16	yes	down		augustus_masked-Fvb5-1-processed-gene-31.10	PREDICTED: hydroquinone glucosyltransferase-like [Fragaria vesca subsp. vesca]	3.14996	3.82754e-30	6.7755e-29	yes	up
maker-Fvb5-3-snap-gene-127.21	PREDICTED: LOW QUALITY PROTEIN: pentatricopeptide repeat-containing protein At4g19440, chloroplastic [Fragaria vesca subsp. vesca]	-1.64899	2.7e-25	4.0136e-24	yes	down		maker-Fvb6-3-augustus-gene-412.52	PREDICTED: FRIGIDA-like protein 4a [Fragaria vesca subsp. vesca]	1.01118	1.12368e-33	2.21558e-32	yes	up
maker-Fvb2-4-augustus-gene-61.32	PREDICTED: glycine-rich RNA-binding, abscisic acid-inducible protein-like isoform X1 [Fragaria vesca subsp. vesca]	-1.59944	1.25e-16	1.26706e-15	yes	down		augustus_masked-Fvb7-2-processed-gene-263.5	PREDICTED: 23.6 kDa heat shock protein, mitochondrial [Fragaria vesca subsp. vesca]	1.56715	2.36122e-07	1.19715e-06	yes	up
augustus_masked-Fvb1-3-processed-gene-247.3	PREDICTED: uncharacterized protein LOC101314695 [Fragaria vesca subsp. vesca]	-1.74587	1.67e-118	1.43382e-116	yes	down		MSTRG.19905	PREDICTED: pentatricopeptide repeat-containing protein At4g02750-like [Fragaria vesca subsp. vesca]	1.94862	0.000658905	0.00209455	yes	up
maker-Fvb5-3-augustus-gene-34.34	PREDICTED: pyridoxine/pyridoxamine 5&apos;-phosphate oxidase 1, chloroplastic [Fragaria vesca subsp. vesca]	-1.23041	2.66e-57	9.29251e-56	yes	down		snap_masked-Fvb1-1-processed-gene-118.22	PREDICTED: SWR1 complex subunit 2 [Fragaria vesca subsp. vesca]	2.27217	1.55509e-07	8.04922e-07	yes	up
augustus_masked-Fvb1-4-processed-gene-23.11	PREDICTED: cysteine-rich receptor-like protein kinase 7 isoform X1 [Fragaria vesca subsp. vesca]	-1.18294	3.53e-48	1.02123e-46	yes	down		MSTRG.41505	PREDICTED: vicilin-like antimicrobial peptides 2-2 [Fragaria vesca subsp. vesca]	2.62022	1.36158e-68	5.77671e-67	yes	up
snap_masked-Fvb7-2-processed-gene-101.34	PREDICTED: uncharacterized protein LOC108174907 [Malus domestica]	-2.36909	2.29e-05	9.13289e-05	yes	down		augustus_masked-Fvb1-2-processed-gene-103.5	PREDICTED: mitogen-activated protein kinase kinase kinase NPK1 [Fragaria vesca subsp. vesca]	1.1831	5.71704e-25	8.39448e-24	yes	up
maker-Fvb7-1-augustus-gene-163.31	PREDICTED: SPX domain-containing membrane protein At4g22990-like [Fragaria vesca subsp. vesca]	-1.10925	9.77e-62	3.70138e-60	yes	down		maker-Fvb3-3-augustus-gene-48.28	PREDICTED: protein argonaute 2 [Fragaria vesca subsp. vesca]	1.33102	1.4092e-48	4.10835e-47	yes	up
snap_masked-Fvb5-3-processed-gene-9.23	nitrate reductase, partial [Fragaria vesca]	-3.01066	0.00060679	0.00194286	yes	down		maker-Fvb4-4-snap-gene-75.61	PREDICTED: formin-like protein 3 [Fragaria vesca subsp. vesca]	1.48825	0.000511134	0.00165733	yes	up
MSTRG.14210	PREDICTED: uncharacterized protein LOC101295094 [Fragaria vesca subsp. vesca]	-1.50481	1.1e-104	7.97898e-103	yes	down		snap_masked-Fvb5-1-processed-gene-100.33	PREDICTED: alpha-N-acetylglucosaminidase-like [Fragaria vesca subsp. vesca]	1.47658	2.61924e-19	3.02118e-18	yes	up
maker-Fvb3-1-snap-gene-289.47	PREDICTED: uncharacterized protein At2g34460, chloroplastic [Fragaria vesca subsp. vesca]	-1.22187	3.45e-33	6.68373e-32	yes	down		maker-Fvb4-4-snap-gene-116.35	PREDICTED: probable prolyl 4-hydroxylase 4 [Fragaria vesca subsp. vesca]	1.36323	2.74549e-17	2.87203e-16	yes	up
maker-Fvb3-1-snap-gene-113.49	nudix hydrolase 10-like isoform X1 [Rosa chinensis]	-1.81133	5.23e-30	9.23738e-29	yes	down		augustus_masked-Fvb5-1-processed-gene-281.10	cryptochrome1 [Fragaria x ananassa]	1.11068	1.49016e-81	7.79782e-80	yes	up
maker-Fvb7-2-snap-gene-60.51	PREDICTED: phosphoglucan phosphatase DSP4, amyloplastic [Fragaria vesca subsp. vesca]	-1.48101	2.05e-136	2.1563e-134	yes	down		augustus_masked-Fvb2-3-processed-gene-50.14	PREDICTED: protein Mpv17-like [Fragaria vesca subsp. vesca]	1.0771	0.00123658	0.00373855	yes	up
augustus_masked-Fvb3-3-processed-gene-249.13	PREDICTED: sodium-dependent phosphate transport protein 1, chloroplastic-like [Fragaria vesca subsp. vesca]	-1.00415	1.51e-37	3.34784e-36	yes	down		maker-Fvb3-2-snap-gene-63.52	PREDICTED: protein argonaute 2 [Fragaria vesca subsp. vesca]	1.10901	1.84845e-40	4.45068e-39	yes	up
MSTRG.6296	PREDICTED: large proline-rich protein bag6-A [Fragaria vesca subsp. vesca]	-1.57475	1.22e-224	3.03065e-222	yes	down		augustus_masked-Fvb6-3-processed-gene-399.24	PREDICTED: ethylene-responsive transcription factor 1B-like [Fragaria vesca subsp. vesca]	2.81377	0.000839278	0.00261822	yes	up
MSTRG.3961	PREDICTED: origin of replication complex subunit 1-like [Fragaria vesca subsp. vesca]	-1.98888	6.51e-11	4.54947e-10	yes	down		snap_masked-Fvb1-3-processed-gene-5.40	PREDICTED: heat shock 70 kDa protein [Fragaria vesca subsp. vesca]	4.81336	7.1536e-60	2.60652e-58	yes	up
augustus_masked-Fvb5-3-processed-gene-85.6	PREDICTED: putative elongation of fatty acids protein DDB_G0272012 [Fragaria vesca subsp. vesca]	-1.72737	2.35e-06	1.06473e-05	yes	down		MSTRG.30893	PREDICTED: uncharacterized protein LOC101298512 [Fragaria vesca subsp. vesca]	1.05484	0.00220326	0.00635038	yes	up
augustus_masked-Fvb7-4-processed-gene-106.8	PREDICTED: pentatricopeptide repeat-containing protein At3g61520, mitochondrial [Fragaria vesca subsp. vesca]	-1.67604	0.000104612	0.000378383	yes	down		maker-Fvb6-3-augustus-gene-49.47	PREDICTED: cytochrome P450 71D9-like [Fragaria vesca subsp. vesca]	1.50047	1.06022e-36	2.30025e-35	yes	up
maker-Fvb5-1-augustus-gene-9.51	PREDICTED: F-box protein PP2-A12-like [Fragaria vesca subsp. vesca]	-1.26199	2.03e-39	4.75363e-38	yes	down		maker-Fvb6-3-augustus-gene-346.40	PREDICTED: auxin transporter-like protein 2 [Fragaria vesca subsp. vesca]	1.84274	2.56108e-172	3.99286e-170	yes	up
maker-Fvb1-2-snap-gene-264.16	PREDICTED: myb-related protein 306 [Fragaria vesca subsp. vesca]	-1.41509	2.85e-20	3.44207e-19	yes	down		maker-Fvb1-3-augustus-gene-57.46	PREDICTED: lysine histidine transporter-like 8 [Fragaria vesca subsp. vesca]	1.99222	9.41964e-125	8.60989e-123	yes	up
MSTRG.33307	PREDICTED: zinc finger protein 7 [Fragaria vesca subsp. vesca]	-1.33761	4.13e-65	1.65355e-63	yes	down		augustus_masked-Fvb6-4-processed-gene-65.8	PREDICTED: calcium-binding protein CML42-like [Fragaria vesca subsp. vesca]	1.69239	2.08202e-12	1.62369e-11	yes	up
maker-Fvb6-4-augustus-gene-316.43	PREDICTED: LOW QUALITY PROTEIN: tricyclene synthase EBOS, chloroplastic-like [Fragaria vesca subsp. vesca]	-1.0011	0.000105386	0.000381078	yes	down		maker-Fvb5-2-snap-gene-18.102	PREDICTED: uncharacterized protein LOC105351806 [Fragaria vesca subsp. vesca]	4.16778	0.000744436	0.00234447	yes	up
MSTRG.7955	PREDICTED: alpha-xylosidase 1 [Fragaria vesca subsp. vesca]	-1.00053	0.000347935	0.00115915	yes	down		maker-Fvb1-2-augustus-gene-16.55	PREDICTED: sugar transport protein 14 [Fragaria vesca subsp. vesca]	2.04329	7.06382e-36	1.49427e-34	yes	up
maker-Fvb2-3-augustus-gene-41.62	PREDICTED: GDSL esterase/lipase EXL3-like [Fragaria vesca subsp. vesca]	-1.64665	2.1e-36	4.49989e-35	yes	down		maker-Fvb4-1-snap-gene-165.78	PREDICTED: uncharacterized protein LOC101301286 [Fragaria vesca subsp. vesca]	2.36998	2.6349e-21	3.33434e-20	yes	up
MSTRG.16098	PREDICTED: 2-Cys peroxiredoxin BAS1, chloroplastic [Fragaria vesca subsp. vesca]	-1.39254	8.4e-19	9.46663e-18	yes	down		MSTRG.15993	PREDICTED: RAN GTPase-activating protein 1 [Fragaria vesca subsp. vesca]	2.18063	0.0104255	0.02585	yes	up
maker-Fvb6-1-snap-gene-4.73	PREDICTED: probable galactinol--sucrose galactosyltransferase 5 [Fragaria vesca subsp. vesca]	-1.89412	0.000337321	0.00112628	yes	down		maker-Fvb5-1-snap-gene-1.37	PREDICTED: 36.4 kDa proline-rich protein [Fragaria vesca subsp. vesca]	4.78551	0.00185426	0.00542422	yes	up
MSTRG.57885	PREDICTED: protein FAR1-RELATED SEQUENCE 5-like [Fragaria vesca subsp. vesca]	-3.9023	4.7e-16	4.58543e-15	yes	down		maker-Fvb6-1-augustus-gene-18.54	PREDICTED: GDSL esterase/lipase At5g14450-like [Fragaria vesca subsp. vesca]	1.62425	4.30114e-09	2.60585e-08	yes	up
maker-Fvb5-4-augustus-gene-136.29	PREDICTED: rop guanine nucleotide exchange factor 14 [Fragaria vesca subsp. vesca]	-1.37702	1.01e-32	1.93363e-31	yes	down		maker-Fvb6-1-augustus-gene-333.47	probable serine/threonine-protein kinase PBL7 [Rosa chinensis]	1.20712	2.71985e-26	4.21428e-25	yes	up
MSTRG.41241	PREDICTED: kinase-interacting family protein isoform X1 [Fragaria vesca subsp. vesca]	-3.1696	6.56e-24	9.23796e-23	yes	down		MSTRG.18561	PREDICTED: C2 domain-containing protein At1g53590 isoform X1 [Fragaria vesca subsp. vesca]	1.65295	1.62243e-38	3.70366e-37	yes	up
augustus_masked-Fvb2-3-processed-gene-201.9	PREDICTED: fasciclin-like arabinogalactan protein 19 [Fragaria vesca subsp. vesca]	-2.92293	2.36e-05	9.39693e-05	yes	down		MSTRG.47283	PREDICTED: lactosylceramide 4-alpha-galactosyltransferase-like [Fragaria vesca subsp. vesca]	1.63676	6.35523e-29	1.08004e-27	yes	up
maker-Fvb1-1-augustus-gene-253.46	PREDICTED: heat stress transcription factor C-1 [Fragaria vesca subsp. vesca]	-1.3842	2.88e-51	8.87048e-50	yes	down		maker-Fvb3-2-snap-gene-69.58	putative non-specific serine/threonine protein kinase [Rosa chinensis]	1.92261	3.48166e-17	3.61832e-16	yes	up
MSTRG.49355	extensin-like [Rosa chinensis]	-1.14399	1.59e-16	1.60079e-15	yes	down		maker-Fvb5-2-augustus-gene-171.17	PREDICTED: uncharacterized protein LOC101298030 [Fragaria vesca subsp. vesca]	1.04427	1.26926e-06	5.94256e-06	yes	up
maker-Fvb2-1-augustus-gene-134.46	PREDICTED: early light-induced protein 1, chloroplastic-like [Fragaria vesca subsp. vesca]	-9.93839	4.37e-171	6.67032e-169	yes	down		maker-Fvb2-1-augustus-gene-215.32	PREDICTED: uncharacterized protein LOC101295482 [Fragaria vesca subsp. vesca]	1.23243	7.93965e-05	0.000292481	yes	up
snap_masked-Fvb1-3-processed-gene-109.23	PREDICTED: cysteine desulfurase 1, mitochondrial [Fragaria vesca subsp. vesca]	-1.09581	5.02e-14	4.36629e-13	yes	down		maker-Fvb3-3-snap-gene-83.41	7-deoxyloganetin glucosyltransferase-like [Rosa chinensis]	1.45448	1.27463e-129	1.22177e-127	yes	up
maker-Fvb6-4-snap-gene-79.46	PREDICTED: omega-3 fatty acid desaturase, chloroplastic-like [Fragaria vesca subsp. vesca]	-1.0837	9.75e-28	1.58837e-26	yes	down		maker-Fvb6-3-augustus-gene-409.54	PREDICTED: cysteine synthase-like isoform X1 [Fragaria vesca subsp. vesca]	1.83456	5.39385e-116	4.45379e-114	yes	up
maker-Fvb4-3-augustus-gene-76.26	PREDICTED: uncharacterized protein LOC101304409 [Fragaria vesca subsp. vesca]	-1.72699	2.38e-28	3.97014e-27	yes	down		maker-Fvb6-1-snap-gene-33.76	PREDICTED: uncharacterized protein LOC101295727 [Fragaria vesca subsp. vesca]	2.54766	2.22755e-08	1.25967e-07	yes	up
MSTRG.52310	PREDICTED: beta-amyrin synthase-like [Fragaria vesca subsp. vesca]	-7.78603	6.86e-20	8.11363e-19	yes	down		maker-Fvb6-1-augustus-gene-45.52	PREDICTED: cytochrome P450 85A isoform X2 [Fragaria vesca subsp. vesca]	1.02995	1.29375e-16	1.30646e-15	yes	up
maker-Fvb6-2-augustus-gene-9.42	PREDICTED: probable mitochondrial adenine nucleotide transporter BTL1 [Fragaria vesca subsp. vesca]	-2.68763	2.37e-17	2.4853e-16	yes	down		maker-Fvb4-3-snap-gene-92.32	PREDICTED: inorganic phosphate transporter 2-1, chloroplastic [Fragaria vesca subsp. vesca]	2.72774	5.95415e-273	1.96121e-270	yes	up
maker-Fvb7-1-snap-gene-252.50	PREDICTED: crocetin glucosyltransferase, chloroplastic-like [Fragaria vesca subsp. vesca]	-1.59829	8.14e-41	1.97661e-39	yes	down		augustus_masked-Fvb1-3-processed-gene-244.4	PREDICTED: U-box domain-containing protein 21 [Fragaria vesca subsp. vesca]	4.55267	1.50396e-09	9.47229e-09	yes	up
maker-Fvb5-3-snap-gene-128.31	PREDICTED: protein NUCLEAR FUSION DEFECTIVE 4-like [Fragaria vesca subsp. vesca]	-1.71468	1.52e-35	3.18766e-34	yes	down		augustus_masked-Fvb1-4-processed-gene-118.15	putative cysteine-rich transmembrane CYSTM domain-containing protein [Rosa chinensis]	1.30852	5.94906e-14	5.15568e-13	yes	up
maker-Fvb6-4-augustus-gene-276.30	PREDICTED: probable mitochondrial adenine nucleotide transporter BTL1 [Fragaria vesca subsp. vesca]	-1.09983	0.000576292	0.00185209	yes	down		augustus_masked-Fvb6-3-processed-gene-12.18	PREDICTED: xyloglucan glycosyltransferase 4-like isoform X1 [Fragaria vesca subsp. vesca]	5.95588	1.37953e-05	5.64968e-05	yes	up
maker-Fvb2-2-augustus-gene-27.57	PREDICTED: ethylene-responsive transcription factor SHINE 2-like [Fragaria vesca subsp. vesca]	-1.06835	0.0035966	0.00992124	yes	down		MSTRG.53259	PREDICTED: uncharacterized protein LOC101311764 isoform X1 [Fragaria vesca subsp. vesca]	1.46314	5.6069e-05	0.000210905	yes	up
maker-Fvb6-3-augustus-gene-73.39	PREDICTED: uncharacterized protein LOC101295436 isoform X1 [Fragaria vesca subsp. vesca]	-1.11016	5.18e-20	6.17113e-19	yes	down		maker-Fvb1-3-snap-gene-104.35	PREDICTED: ACT domain-containing protein ACR1 [Fragaria vesca subsp. vesca]	1.5106	0.000408021	0.00134533	yes	up
maker-Fvb7-1-augustus-gene-123.38	PREDICTED: protein ECERIFERUM 1-like [Fragaria vesca subsp. vesca]	-6.37633	2.56e-13	2.12897e-12	yes	down		maker-Fvb2-3-augustus-gene-27.53	PREDICTED: cytochrome P450 CYP82D47-like [Fragaria vesca subsp. vesca]	1.54567	6.15144e-06	2.64554e-05	yes	up
maker-Fvb7-4-augustus-gene-134.34	PREDICTED: uncharacterized protein LOC101299228 [Fragaria vesca subsp. vesca]	-1.272	4.84e-08	2.63851e-07	yes	down		MSTRG.36719	PREDICTED: leucine-rich repeat extensin-like protein 3 [Fragaria vesca subsp. vesca]	1.16729	2.25884e-11	1.63752e-10	yes	up
MSTRG.39072	proline-rich receptor-like protein kinase PERK2 [Rosa chinensis]	-1.59765	1.1e-07	5.79828e-07	yes	down		maker-Fvb2-2-augustus-gene-68.61	PREDICTED: hyoscyamine 6-dioxygenase-like [Fragaria vesca subsp. vesca]	1.03341	2.23383e-32	4.23044e-31	yes	up
maker-Fvb7-3-augustus-gene-4.72	PREDICTED: uncharacterized protein LOC101298945 [Fragaria vesca subsp. vesca]	-10.3279	1.11e-16	1.12486e-15	yes	down		maker-Fvb3-4-augustus-gene-245.37	PREDICTED: uncharacterized protein LOC101293076 [Fragaria vesca subsp. vesca]	2.40381	0.00105798	0.00323999	yes	up
maker-Fvb3-2-augustus-gene-264.50	PREDICTED: alpha-glucan phosphorylase, H isozyme [Fragaria vesca subsp. vesca]	-1.409	9.2e-158	1.20726e-155	yes	down		augustus_masked-Fvb3-1-processed-gene-155.13	PREDICTED: ferredoxin, root R-B1 [Fragaria vesca subsp. vesca]	1.13899	9.05057e-07	4.3098e-06	yes	up
augustus_masked-Fvb7-2-processed-gene-318.7	PREDICTED: ethylene-responsive transcription factor CRF4 [Fragaria vesca subsp. vesca]	-4.21954	0.00926631	0.0232733	yes	down		maker-Fvb6-2-augustus-gene-49.21	PREDICTED: auxin-induced protein IAA6 [Fragaria vesca subsp. vesca]	1.19923	1.05975e-07	5.57972e-07	yes	up
augustus_masked-Fvb2-4-processed-gene-63.1	PREDICTED: polyphenol oxidase I, chloroplastic-like [Fragaria vesca subsp. vesca]	-4.74111	3.47e-07	1.7298e-06	yes	down		maker-Fvb3-3-snap-gene-232.57	PREDICTED: nicotinamide mononucleotide adenylyltransferase [Fragaria vesca subsp. vesca]	3.72972	0.000974355	0.003003	yes	up
maker-Fvb5-2-augustus-gene-238.35	PREDICTED: sulfate transporter 1.3 [Fragaria vesca subsp. vesca]	-1.47453	1.02e-98	6.86678e-97	yes	down		maker-Fvb6-1-augustus-gene-220.40	PREDICTED: uncharacterized protein LOC101300076 isoform X1 [Fragaria vesca subsp. vesca]	1.08439	2.48521e-09	1.53577e-08	yes	up
maker-Fvb3-1-augustus-gene-224.65	PREDICTED: heme-binding protein 2 [Fragaria vesca subsp. vesca]	-1.32031	1.62e-17	1.71336e-16	yes	down		maker-Fvb4-2-augustus-gene-13.56	PREDICTED: potassium transporter 6-like isoform X1 [Fragaria vesca subsp. vesca]	1.17113	7.4277e-11	5.16988e-10	yes	up
maker-Fvb1-1-augustus-gene-205.23	PREDICTED: probable vacuolar amino acid transporter YPQ2 isoform X2 [Fragaria vesca subsp. vesca]	-1.28187	6.4e-21	7.94681e-20	yes	down		maker-Fvb5-1-augustus-gene-3.58	PREDICTED: phospholipase D gamma 1-like [Fragaria vesca subsp. vesca]	3.66352	1.66576e-287	6.0114e-285	yes	up
maker-Fvb5-2-augustus-gene-69.39	PREDICTED: 40S ribosomal protein S7-1 [Fragaria vesca subsp. vesca]	-1.38573	1.13e-34	2.31475e-33	yes	down		maker-Fvb3-1-augustus-gene-318.50	PREDICTED: farnesyl pyrophosphate synthase 1 [Fragaria vesca subsp. vesca]	1.2416	2.96912e-46	8.23473e-45	yes	up
MSTRG.15908	hypothetical protein PRUPE_7G010900 [Prunus persica]	-1.04379	1.81e-38	4.12613e-37	yes	down		snap_masked-Fvb7-4-processed-gene-40.24	expansin A2 [Fragaria chiloensis]	3.51056	0	0	yes	up
augustus_masked-Fvb7-2-processed-gene-52.4	PREDICTED: cytochrome P450 77A3-like [Fragaria vesca subsp. vesca]	-1.0816	2e-32	3.79655e-31	yes	down		maker-Fvb3-1-augustus-gene-281.26	PREDICTED: probable alpha,alpha-trehalose-phosphate synthase [UDP-forming] 7 [Fragaria vesca subsp. vesca]	1.3413	1.12283e-38	2.58009e-37	yes	up
maker-Fvb4-2-augustus-gene-214.19	PREDICTED: GATA zinc finger domain-containing protein 5-like isoform X2 [Fragaria vesca subsp. vesca]	-1.46594	2.65e-53	8.52776e-52	yes	down		maker-Fvb6-3-augustus-gene-363.36	PREDICTED: ubiquitin-conjugating enzyme E2 28 [Fragaria vesca subsp. vesca]	1.40045	3.16212e-109	2.43768e-107	yes	up
maker-Fvb3-3-snap-gene-175.43	PREDICTED: inactive beta-amylase 4, chloroplastic [Fragaria vesca subsp. vesca]	-1.19415	1.1e-23	1.5322e-22	yes	down		maker-Fvb5-4-augustus-gene-14.43	PREDICTED: BTB/POZ domain-containing protein At5g41330 [Fragaria vesca subsp. vesca]	3.35321	2.73832e-20	3.3094e-19	yes	up
maker-Fvb4-1-augustus-gene-114.33	PREDICTED: DEAD-box ATP-dependent RNA helicase 58, chloroplastic isoform X1 [Fragaria vesca subsp. vesca]	-1.12243	5.78e-07	2.80916e-06	yes	down		snap_masked-Fvb3-4-processed-gene-211.33	PREDICTED: uncharacterized protein LOC105350805 [Fragaria vesca subsp. vesca]	2.40003	1.81803e-15	1.72349e-14	yes	up
maker-Fvb3-4-augustus-gene-35.50	PREDICTED: THO complex subunit 3-like isoform X1 [Fragaria vesca subsp. vesca]	-3.76138	0.00954126	0.023897	yes	down		MSTRG.19023	hypothetical protein RchiOBHm_Chr5g0011631 [Rosa chinensis]	1.45309	0.0080928	0.0206164	yes	up
maker-Fvb5-3-augustus-gene-20.37	PREDICTED: uncharacterized methyltransferase At1g78140, chloroplastic [Fragaria vesca subsp. vesca]	-1.09438	4.69e-34	9.37391e-33	yes	down		maker-Fvb6-2-augustus-gene-58.21	phospholipase D alpha [Fragaria x ananassa]	1.84178	5.34164e-79	2.66291e-77	yes	up
maker-Fvb3-4-augustus-gene-258.55	PREDICTED: ABC transporter B family member 9 [Fragaria vesca subsp. vesca]	-1.27873	8.74e-09	5.14566e-08	yes	down		augustus_masked-Fvb3-1-processed-gene-301.7	PREDICTED: B-box zinc finger protein 21-like [Fragaria vesca subsp. vesca]	3.91241	1.0714e-10	7.35661e-10	yes	up
maker-Fvb7-2-augustus-gene-208.40	PREDICTED: armadillo repeat-containing kinesin-like protein 1 isoform X1 [Fragaria vesca subsp. vesca]	-1.06204	6.71e-13	5.41985e-12	yes	down		maker-Fvb4-3-augustus-gene-12.55	PREDICTED: formin-like protein 8 [Fragaria vesca subsp. vesca]	1.699	5.71066e-27	9.06232e-26	yes	up
maker-Fvb3-4-augustus-gene-210.28	PREDICTED: heme-binding protein 2 [Fragaria vesca subsp. vesca]	-1.69507	1.07e-180	1.79268e-178	yes	down		maker-Fvb4-3-augustus-gene-144.20	PREDICTED: inactive beta-amylase 9 [Fragaria vesca subsp. vesca]	3.36613	7.4419e-156	9.62992e-154	yes	up
maker-Fvb6-3-augustus-gene-282.28	PREDICTED: growth-regulating factor 3 [Fragaria vesca subsp. vesca]	-1.23366	5.58e-05	0.000209834	yes	down		maker-Fvb5-4-snap-gene-68.84	PREDICTED: protein NRT1/ PTR FAMILY 4.6 [Fragaria vesca subsp. vesca]	4.82279	6.58461e-05	0.00024553	yes	up
snap_masked-Fvb3-3-processed-gene-37.22	PREDICTED: U3 small nucleolar RNA-interacting protein 2-like [Fragaria vesca subsp. vesca]	-1.99922	2.98e-09	1.82746e-08	yes	down		maker-Fvb4-3-augustus-gene-89.45	PREDICTED: type I inositol 1,4,5-trisphosphate 5-phosphatase CVP2 isoform X1 [Fragaria vesca subsp. vesca]	3.84864	9.03458e-13	7.24598e-12	yes	up
maker-Fvb1-1-augustus-gene-183.38	PREDICTED: tRNA-dihydrouridine(16/17) synthase [NAD(P)(+)]-like [Fragaria vesca subsp. vesca]	-1.00659	3.6e-18	3.925e-17	yes	down		augustus_masked-Fvb1-3-processed-gene-163.1	PREDICTED: U-box domain-containing protein 27-like [Fragaria vesca subsp. vesca]	2.18952	1.13858e-12	9.05791e-12	yes	up
augustus_masked-Fvb1-4-processed-gene-49.3	PREDICTED: dirigent protein 23-like [Fragaria vesca subsp. vesca]	-1.19194	3.77e-28	6.24277e-27	yes	down		maker-Fvb1-4-augustus-gene-40.35	PREDICTED: TMV resistance protein N-like [Fragaria vesca subsp. vesca]	1.01249	1.77255e-10	1.19892e-09	yes	up
maker-Fvb5-2-snap-gene-27.67	PREDICTED: DNA primase small subunit [Fragaria vesca subsp. vesca]	-2.5369	3.94e-26	6.0649e-25	yes	down		augustus_masked-Fvb7-2-processed-gene-270.13	LOW QUALITY PROTEIN: carboxylesterase 1-like [Rosa chinensis]	2.38196	2.9344e-05	0.000115165	yes	up
maker-Fvb5-4-snap-gene-57.69	PREDICTED: probable trehalase [Fragaria vesca subsp. vesca]	-1.95127	1.34e-33	2.63744e-32	yes	down		augustus_masked-Fvb6-2-processed-gene-278.7	PREDICTED: uncharacterized protein LOC105352535 [Fragaria vesca subsp. vesca]	1.79745	1.59075e-05	6.45949e-05	yes	up
maker-Fvb1-3-snap-gene-199.33	PREDICTED: boron transporter 1 [Fragaria vesca subsp. vesca]	-1.33553	0.00265658	0.00753139	yes	down		maker-Fvb2-2-augustus-gene-195.42	PREDICTED: protein EXECUTER 2, chloroplastic [Fragaria vesca subsp. vesca]	3.56696	0.000397848	0.00131397	yes	up
augustus_masked-Fvb3-2-processed-gene-177.6	PREDICTED: cytochrome P450 89A2-like [Fragaria vesca subsp. vesca]	-1.39287	2.22e-07	1.12716e-06	yes	down		augustus_masked-Fvb6-4-processed-gene-133.7	PREDICTED: uncharacterized protein LOC101291844 [Fragaria vesca subsp. vesca]	1.14479	6.60877e-13	5.34299e-12	yes	up
maker-Fvb3-4-snap-gene-123.24	O-acyltransferase WSD1-like [Rosa chinensis]	-1.59825	2.23e-47	6.35596e-46	yes	down		MSTRG.31131	--	2.54715	7.0773e-81	3.64658e-79	yes	up
maker-Fvb3-2-snap-gene-95.27	PREDICTED: ubiquitin carboxyl-terminal hydrolase 15 isoform X1 [Fragaria vesca subsp. vesca]	-1.48716	8.81e-136	9.19829e-134	yes	down		MSTRG.23779	PREDICTED: monofunctional riboflavin biosynthesis protein RIBA 3, chloroplastic [Fragaria vesca subsp. vesca]	1.48761	4.56819e-10	2.99566e-09	yes	up
maker-Fvb2-2-augustus-gene-139.28	PREDICTED: protein EPIDERMAL PATTERNING FACTOR 2 [Fragaria vesca subsp. vesca]	-1.98083	0.0205551	0.0471977	yes	down		maker-Fvb5-1-augustus-gene-38.47	PREDICTED: probable boron transporter 2 [Fragaria vesca subsp. vesca]	1.61802	5.87978e-21	7.32393e-20	yes	up
augustus_masked-Fvb3-2-processed-gene-304.5	PREDICTED: ABC transporter C family member 10-like [Fragaria vesca subsp. vesca]	-1.50558	4.38e-112	3.48121e-110	yes	down		augustus_masked-Fvb3-4-processed-gene-112.10	PREDICTED: nuclear transcription factor Y subunit B-3-like [Fragaria vesca subsp. vesca]	2.21322	1.74818e-08	9.99003e-08	yes	up
maker-Fvb2-2-augustus-gene-63.41	PREDICTED: beta-carotene isomerase D27, chloroplastic [Fragaria vesca subsp. vesca]	-1.48467	7.5e-42	1.86686e-40	yes	down		maker-Fvb1-4-snap-gene-17.53	PREDICTED: 36.4 kDa proline-rich protein [Fragaria vesca subsp. vesca]	3.71671	6.94471e-77	3.36215e-75	yes	up
maker-Fvb2-4-snap-gene-243.64	PREDICTED: uncharacterized protein LOC101315016 [Fragaria vesca subsp. vesca]	-1.16587	5.23e-34	1.04226e-32	yes	down		MSTRG.25050	PREDICTED: E3 ubiquitin-protein ligase RGLG1 isoform X2 [Fragaria vesca subsp. vesca]	1.57386	7.17148e-23	9.68973e-22	yes	up
maker-Fvb1-4-augustus-gene-4.46	PREDICTED: probable serine incorporator isoform X1 [Fragaria vesca subsp. vesca]	-1.09801	0.000343657	0.00114604	yes	down		maker-Fvb1-1-augustus-gene-188.47	PREDICTED: salicylic acid-binding protein 2-like [Fragaria vesca subsp. vesca]	1.71574	9.85026e-27	1.552e-25	yes	up
snap_masked-Fvb5-4-processed-gene-26.23	RING-H2 finger protein ATL20-like [Rosa chinensis]	-1.95401	0.00333878	0.00926874	yes	down		maker-Fvb4-2-snap-gene-91.27	PREDICTED: acyl-CoA dehydrogenase family member 10 [Fragaria vesca subsp. vesca]	1.05999	6.29374e-28	1.03371e-26	yes	up
maker-Fvb1-3-augustus-gene-15.68	PREDICTED: peroxidase 25 [Fragaria vesca subsp. vesca]	-1.0865	2.72e-05	0.000107362	yes	down		maker-Fvb4-2-augustus-gene-68.47	uncharacterized protein LOC112196626 [Rosa chinensis]	3.48936	7.30111e-07	3.50919e-06	yes	up
maker-Fvb2-4-snap-gene-72.42	PREDICTED: WD repeat-containing protein 13 [Fragaria vesca subsp. vesca]	-1.05725	1.2e-24	1.73613e-23	yes	down		augustus_masked-Fvb5-1-processed-gene-100.12	PREDICTED: uncharacterized protein LOC105351544 [Fragaria vesca subsp. vesca]	1.06932	0.0151776	0.0361059	yes	up
maker-Fvb4-3-augustus-gene-114.42	PREDICTED: transcription factor HY5-like isoform X5 [Fragaria vesca subsp. vesca]	-2.44092	3.7e-287	1.3263e-284	yes	down		maker-Fvb6-1-augustus-gene-154.45	PREDICTED: phospholipase D alpha 1 [Fragaria vesca subsp. vesca]	1.13591	1.25553e-35	2.63869e-34	yes	up
maker-Fvb6-3-augustus-gene-389.38	PREDICTED: collagen alpha-1(XVII) chain-like [Fragaria vesca subsp. vesca]	-1.73636	0.000128179	0.000457595	yes	down		augustus_masked-Fvb2-2-processed-gene-105.16	protein PELPK1 [Rosa chinensis]	1.53422	3.1144e-26	4.8182e-25	yes	up
[truncated: 4,367 more rows]
