# Supplementary material for: Genome-wide characterization and expression of the TLP gene family associated with Colletotrichum gloeosporioides inoculation in Fragaria × ananassa
Source: PeerJ. 2022 Mar 24;10:e12979. doi: 10.7717/peerj.12979 (PMC8958966; doi:10.7717/peerj.12979)
Supplement: Supplemental Information 3 — Based on p-adjust < 0.05, and |log2FC| > 1. [file peerj-10-12979-s003.xlsx]

## Sheet: S3
Table S3.Differentially expressed genes in Benihoppe-Infected/Uninfected( |log2FC| > 1).
Gene_id	Gene description	log2(Benihoppe-Infected/Uninfected)	Pvalue	Padjust	Significant	Regulated		Gene_id	Gene description	log2(Benihoppe-Infected/Uninfected)	Pvalue	Padjust	Significant	Regulated
maker-Fvb4-1-augustus-gene-92.44	hypothetical protein RchiOBHm_Chr4g0409991 [Rosa chinensis]	-1.03234	0.00146847	0.00390111	yes	down		augustus_masked-Fvb4-1-processed-gene-189.7	PREDICTED: uncharacterized protein LOC101307982 [Fragaria vesca subsp. vesca]	2.82967	2.7306e-72	1.31768e-70	yes	up
maker-Fvb4-4-augustus-gene-12.53	PREDICTED: DEAD-box ATP-dependent RNA helicase ISE2, chloroplastic [Fragaria vesca subsp. vesca]	-2.23052	1.78937e-05	6.36129e-05	yes	down		maker-Fvb3-3-augustus-gene-10.41	PREDICTED: putative ALA-interacting subunit 2 [Fragaria vesca subsp. vesca]	1.70998	0.00186139	0.00485269	yes	up
maker-Fvb1-1-augustus-gene-153.34	PREDICTED: phospho-2-dehydro-3-deoxyheptonate aldolase 2, chloroplastic-like [Fragaria vesca subsp. vesca]	-2.98997	3.08735e-144	4.5145e-142	yes	down		maker-Fvb7-3-snap-gene-231.38	PREDICTED: ADP,ATP carrier protein 1, mitochondrial [Fragaria vesca subsp. vesca]	1.30496	2.97955e-10	1.70289e-09	yes	up
maker-Fvb5-3-snap-gene-200.61	putative transcription factor C2H2 family [Rosa chinensis]	-2.26839	3.56328e-227	1.31621e-224	yes	down		maker-Fvb3-1-snap-gene-38.45	E3 ubiquitin-protein ligase SINAT3 isoform X2 [Rosa chinensis]	1.18529	2.48129e-21	2.77301e-20	yes	up
maker-Fvb7-1-augustus-gene-204.36	transcriptional activator Myb [Fragaria vesca]	-1.33882	2.09467e-08	1.01936e-07	yes	down		augustus_masked-Fvb3-2-processed-gene-306.2	PREDICTED: transmembrane protein 45B [Fragaria vesca subsp. vesca]	1.61959	9.60124e-13	6.61436e-12	yes	up
snap_masked-Fvb6-2-processed-gene-291.28	PREDICTED: UDP-glycosyltransferase 90A1 [Fragaria vesca subsp. vesca]	-2.63383	3.63842e-20	3.83902e-19	yes	down		maker-Fvb4-3-augustus-gene-54.46	PREDICTED: transcription factor MYB24 [Fragaria vesca subsp. vesca]	3.31755	0.0157799	0.0339868	yes	up
maker-Fvb6-2-augustus-gene-350.32	PREDICTED: DEAD-box ATP-dependent RNA helicase 53-like [Fragaria vesca subsp. vesca]	-1.74751	6.64216e-61	2.58098e-59	yes	down		augustus_masked-Fvb4-3-processed-gene-42.14	hypothetical protein RchiOBHm_Chr4g0437271 [Rosa chinensis]	2.9901	1.88312e-14	1.45475e-13	yes	up
maker-Fvb5-3-augustus-gene-266.57	PREDICTED: homeobox protein knotted-1-like 7 [Fragaria vesca subsp. vesca]	-1.66801	1.10271e-87	7.1982e-86	yes	down		augustus_masked-Fvb7-3-processed-gene-65.1	PREDICTED: nematode resistance protein-like HSPRO2 [Fragaria vesca subsp. vesca]	1.33347	3.50329e-05	0.000119744	yes	up
MSTRG.55685	PREDICTED: uncharacterized protein LOC101306935 [Fragaria vesca subsp. vesca]	-1.78922	9.16808e-26	1.24501e-24	yes	down		maker-Fvb4-2-augustus-gene-244.31	PREDICTED: acylamino-acid-releasing enzyme-like isoform X3 [Fragaria vesca subsp. vesca]	1.07	1.36145e-16	1.19577e-15	yes	up
MSTRG.17867	PREDICTED: protein TIC 20-v, chloroplastic [Fragaria vesca subsp. vesca]	-1.93416	1.02338e-41	2.41783e-40	yes	down		MSTRG.8865	PREDICTED: probable serine/threonine protein kinase IRE [Fragaria vesca subsp. vesca]	1.66825	1.96041e-11	1.22544e-10	yes	up
augustus_masked-Fvb5-1-processed-gene-251.13	PREDICTED: pentatricopeptide repeat-containing protein At5g48730, chloroplastic [Fragaria vesca subsp. vesca]	-1.1649	2.62503e-12	1.75427e-11	yes	down		augustus_masked-Fvb6-1-processed-gene-364.5	PREDICTED: ethylene-responsive transcription factor 1B-like [Fragaria vesca subsp. vesca]	4.58729	0.0111518	0.0248854	yes	up
augustus_masked-Fvb7-1-processed-gene-320.15	PREDICTED: probable folate-biopterin transporter 7 [Fragaria vesca subsp. vesca]	-2.05402	3.18977e-84	1.96505e-82	yes	down		MSTRG.20245	PREDICTED: uncharacterized protein LOC101307378 [Fragaria vesca subsp. vesca]	1.44207	7.16814e-40	1.59885e-38	yes	up
maker-Fvb6-2-snap-gene-351.55	PREDICTED: putative laccase-9 [Fragaria vesca subsp. vesca]	-2.17786	1.73688e-54	5.77345e-53	yes	down		augustus_masked-Fvb2-3-processed-gene-226.11	PREDICTED: chaperone protein dnaJ 11, chloroplastic-like [Fragaria vesca subsp. vesca]	7.01502	7.72888e-11	4.62536e-10	yes	up
augustus_masked-Fvb7-2-processed-gene-45.16	PREDICTED: arginine decarboxylase-like [Fragaria vesca subsp. vesca]	-1.09663	7.69e-15	6.08531e-14	yes	down		MSTRG.62152	PREDICTED: uncharacterized protein LOC101308624 [Fragaria vesca subsp. vesca]	1.60536	6.05308e-56	2.08516e-54	yes	up
snap_masked-Fvb6-3-processed-gene-218.22	PREDICTED: uncharacterized protein LOC101312459 [Fragaria vesca subsp. vesca]	-1.15479	2.06223e-14	1.58844e-13	yes	down		maker-Fvb6-2-snap-gene-235.50	G-type lectin S-receptor-like serine/threonine-protein kinase RKS1 isoform X1 [Rosa chinensis]	1.54476	1.51875e-07	6.79486e-07	yes	up
maker-Fvb7-4-snap-gene-154.38	PREDICTED: protein ECERIFERUM 1-like [Fragaria vesca subsp. vesca]	-2.17518	2.95573e-52	9.31015e-51	yes	down		maker-Fvb1-3-snap-gene-7.73	PREDICTED: factor of DNA methylation 3-like [Fragaria vesca subsp. vesca]	2.32786	2.86715e-88	1.88903e-86	yes	up
MSTRG.42335	uncharacterized protein LOC112176076 [Rosa chinensis]	-1.00845	1.63609e-16	1.42852e-15	yes	down		maker-Fvb6-1-augustus-gene-306.65	PREDICTED: probable WRKY transcription factor 70 isoform X1 [Fragaria vesca subsp. vesca]	2.47672	1.99552e-26	2.78724e-25	yes	up
maker-Fvb1-1-augustus-gene-166.21	PREDICTED: probable mannitol dehydrogenase [Fragaria vesca subsp. vesca]	-1.22451	6.13966e-54	2.01105e-52	yes	down		maker-Fvb7-2-augustus-gene-127.24	PREDICTED: anthocyanidin reductase-like [Fragaria vesca subsp. vesca]	2.03992	1.56422e-15	1.29218e-14	yes	up
augustus_masked-Fvb7-1-processed-gene-36.8	PREDICTED: cytosolic sulfotransferase 15-like [Fragaria vesca subsp. vesca]	-1.69406	1.18403e-57	4.2757e-56	yes	down		maker-Fvb2-2-snap-gene-241.41	PREDICTED: uncharacterized protein LOC101300152 [Fragaria vesca subsp. vesca]	1.90609	0.0161616	0.0347316	yes	up
augustus_masked-Fvb6-2-processed-gene-285.6	PREDICTED: 28 kDa ribonucleoprotein, chloroplastic-like [Fragaria vesca subsp. vesca]	-1.2881	4.4361e-75	2.2505e-73	yes	down		augustus_masked-Fvb3-4-processed-gene-186.7	uncharacterized protein LOC112203571 [Rosa chinensis]	1.84392	2.19098e-06	8.67862e-06	yes	up
maker-Fvb5-3-snap-gene-27.56	PREDICTED: 7-deoxyloganetin glucosyltransferase-like [Fragaria vesca subsp. vesca]	-3.77772	0.01035	0.0232551	yes	down		maker-Fvb3-4-snap-gene-10.87	PREDICTED: receptor-like protein 2 [Fragaria vesca subsp. vesca]	1.29415	1.07977e-26	1.52344e-25	yes	up
maker-Fvb2-3-augustus-gene-11.46	transcription factor HY5 [Fragaria x ananassa]	-1.11807	9.09462e-38	1.89122e-36	yes	down		maker-Fvb3-4-augustus-gene-46.35	PREDICTED: probable protein phosphatase 2C 25 [Fragaria vesca subsp. vesca]	2.41715	4.08187e-68	1.83317e-66	yes	up
augustus_masked-Fvb1-2-processed-gene-121.7	PREDICTED: cysteine desulfurase 1, mitochondrial [Fragaria vesca subsp. vesca]	-1.39373	2.81967e-12	1.87806e-11	yes	down		maker-Fvb7-3-snap-gene-234.25	hypothetical protein RchiOBHm_Chr2g0120801 [Rosa chinensis]	1.3194	0.00597078	0.0141251	yes	up
maker-Fvb6-4-snap-gene-319.62	PREDICTED: uncharacterized GPI-anchored protein At4g28100 [Fragaria vesca subsp. vesca]	-1.15796	2.86478e-05	9.91501e-05	yes	down		maker-Fvb6-4-augustus-gene-272.34	PREDICTED: mitochondrial arginine transporter BAC2-like [Fragaria vesca subsp. vesca]	1.08834	0.0059528	0.0140891	yes	up
maker-Fvb4-1-augustus-gene-184.46	PREDICTED: vacuolar iron transporter 1-like [Fragaria vesca subsp. vesca]	-1.63223	1.9073e-18	1.84873e-17	yes	down		maker-Fvb6-1-snap-gene-151.40	PREDICTED: putative disease resistance protein RGA3 [Fragaria vesca subsp. vesca]	1.53972	1.06714e-25	1.44541e-24	yes	up
maker-Fvb4-1-augustus-gene-196.31	RecName: Full=D-galacturonate reductase; Short=FaGalUR; AltName: Full=Aldo-keto reductase 2	-1.76233	1.24024e-60	4.78694e-59	yes	down		maker-Fvb1-2-snap-gene-208.19	PREDICTED: homogentisate geranylgeranyltransferase-like [Fragaria vesca subsp. vesca]	1.37688	0.000103217	0.000330576	yes	up
maker-Fvb2-1-augustus-gene-157.59	auxin-binding protein [Fragaria x ananassa]	-1.04754	1.8628e-45	4.88963e-44	yes	down		augustus_masked-Fvb6-3-processed-gene-62.5	PREDICTED: triacylglycerol lipase 2-like [Fragaria vesca subsp. vesca]	3.57067	0.021351	0.044519	yes	up
MSTRG.31369	PREDICTED: high affinity nitrate transporter 2.5-like [Fragaria vesca subsp. vesca]	-2.64681	2.14302e-48	6.08918e-47	yes	down		maker-Fvb5-3-augustus-gene-211.44	PREDICTED: protein PLANT CADMIUM RESISTANCE 6-like [Fragaria vesca subsp. vesca]	1.05906	0.000206556	0.000632368	yes	up
augustus_masked-Fvb3-3-processed-gene-262.6	PREDICTED: CBL-interacting serine/threonine-protein kinase 10 [Fragaria vesca subsp. vesca]	-1.07975	5.40232e-15	4.31547e-14	yes	down		maker-Fvb5-1-augustus-gene-268.43	PREDICTED: pectinesterase-like [Fragaria vesca subsp. vesca]	1.509	0.00527369	0.0126086	yes	up
maker-Fvb2-3-augustus-gene-230.31	PREDICTED: heavy metal-associated isoprenylated plant protein 26 [Fragaria vesca subsp. vesca]	-1.75558	1.68486e-42	4.07592e-41	yes	down		MSTRG.63829	uncharacterized protein LOC109947231 [Prunus persica]	1.2988	2.387e-34	4.45327e-33	yes	up
maker-Fvb3-2-augustus-gene-17.31	PREDICTED: histidine kinase 2-like [Fragaria vesca subsp. vesca]	-1.43863	0.00273605	0.00692699	yes	down		maker-Fvb3-4-augustus-gene-252.40	PREDICTED: uncharacterized protein LOC101293173 [Fragaria vesca subsp. vesca]	1.29856	9.89672e-09	4.96515e-08	yes	up
MSTRG.29008	hypothetical protein RchiOBHm_Chr4g0434141 [Rosa chinensis]	-3.21951	2.76946e-05	9.60424e-05	yes	down		augustus_masked-Fvb6-4-processed-gene-260.1	PREDICTED: UPF0481 protein At3g47200-like [Fragaria vesca subsp. vesca]	2.13321	0.000119806	0.000380068	yes	up
MSTRG.42208	phosphoglycerate mutase-like protein AT74H [Rosa chinensis]	-1.11367	7.76083e-34	1.42618e-32	yes	down		maker-Fvb6-1-augustus-gene-298.49	PREDICTED: FK506-binding protein 4-like [Fragaria vesca subsp. vesca]	1.00311	1.59306e-11	1.00338e-10	yes	up
maker-Fvb4-1-augustus-gene-153.43	PREDICTED: uncharacterized protein LOC101308762 [Fragaria vesca subsp. vesca]	-1.50814	5.48996e-38	1.15284e-36	yes	down		MSTRG.50600	zinc transporter 5 isoform X2 [Prunus avium]	1.01025	9.99938e-38	2.07749e-36	yes	up
MSTRG.44427	PREDICTED: transcription factor TGA7-like isoform X1 [Fragaria vesca subsp. vesca]	-1.65518	6.32066e-17	5.66397e-16	yes	down		maker-Fvb4-3-augustus-gene-290.49	PREDICTED: uncharacterized protein LOC101301288 [Fragaria vesca subsp. vesca]	1.79822	0.000424541	0.00123729	yes	up
snap_masked-Fvb3-3-processed-gene-139.7	PREDICTED: uncharacterized protein LOC105349931 [Fragaria vesca subsp. vesca]	-4.77059	0	0	yes	down		maker-Fvb5-1-augustus-gene-247.27	PREDICTED: 12-oxophytodienoate reductase 1-like, partial [Fragaria vesca subsp. vesca]	2.82637	8.82843e-06	3.2587e-05	yes	up
maker-Fvb2-1-augustus-gene-194.39	PREDICTED: adenine nucleotide transporter BT1, chloroplastic/mitochondrial-like [Fragaria vesca subsp. vesca]	-1.54131	8.82232e-26	1.19929e-24	yes	down		snap_masked-Fvb3-2-processed-gene-5.29	hypothetical protein RchiOBHm_Chr5g0013541 [Rosa chinensis]	3.00884	5.20782e-07	2.20989e-06	yes	up
maker-Fvb2-3-augustus-gene-189.29	PREDICTED: bZIP transcription factor TRAB1 [Fragaria vesca subsp. vesca]	-1.43548	6.37803e-48	1.79122e-46	yes	down		maker-Fvb3-2-snap-gene-70.50	PREDICTED: pentatricopeptide repeat-containing protein At4g20090 [Fragaria vesca subsp. vesca]	1.64452	0.0153056	0.0330643	yes	up
maker-Fvb6-4-augustus-gene-48.46	PREDICTED: uncharacterized protein LOC101290777 isoform X3 [Fragaria vesca subsp. vesca]	-1.13155	1.24588e-06	5.06747e-06	yes	down		maker-Fvb3-1-augustus-gene-224.64	PREDICTED: 60S ribosomal protein L18a-like protein [Fragaria vesca subsp. vesca]	2.53761	7.02109e-81	3.97643e-79	yes	up
maker-Fvb6-1-augustus-gene-17.58	PREDICTED: 28 kDa ribonucleoprotein, chloroplastic-like [Fragaria vesca subsp. vesca]	-1.27048	2.07666e-85	1.31004e-83	yes	down		maker-Fvb2-3-augustus-gene-29.73	putative PPPDE putative peptidase domain-containing protein [Rosa chinensis]	1.12549	8.58494e-62	3.39617e-60	yes	up
maker-Fvb1-3-snap-gene-57.61	PREDICTED: uncharacterized protein LOC101305976 [Fragaria vesca subsp. vesca]	-1.02245	0.000370651	0.00109053	yes	down		maker-Fvb4-4-augustus-gene-119.36	uncharacterized protein LOC112198305 [Rosa chinensis]	1.23769	0.0218581	0.0454446	yes	up
maker-Fvb2-4-augustus-gene-240.28	PREDICTED: probable lactoylglutathione lyase, chloroplast [Fragaria vesca subsp. vesca]	-1.5769	4.04036e-55	1.36875e-53	yes	down		maker-Fvb2-2-augustus-gene-204.41	PREDICTED: probable indole-3-acetic acid-amido synthetase GH3.1 [Fragaria vesca subsp. vesca]	2.83085	1.49298e-08	7.35662e-08	yes	up
maker-Fvb5-2-snap-gene-11.58	PREDICTED: uncharacterized protein LOC101313699 isoform X1 [Fragaria vesca subsp. vesca]	-3.36536	0	0	yes	down		maker-Fvb2-2-snap-gene-132.60	PREDICTED: probable serine/threonine-protein kinase At1g54610 [Fragaria vesca subsp. vesca]	2.11844	0.000154071	0.000480465	yes	up
maker-Fvb3-2-augustus-gene-60.42	PREDICTED: probable UDP-arabinose 4-epimerase 3 [Fragaria vesca subsp. vesca]	-1.13006	3.67893e-22	4.27725e-21	yes	down		MSTRG.49061	RING-H2 finger protein ATL47-like [Prunus avium]	1.18318	9.68651e-29	1.49434e-27	yes	up
snap_masked-Fvb6-3-processed-gene-313.37	PREDICTED: uncharacterized protein LOC101298344 isoform X1 [Fragaria vesca subsp. vesca]	-1.4642	1.30006e-83	7.91885e-82	yes	down		maker-Fvb5-1-augustus-gene-272.25	PREDICTED: uncharacterized protein LOC101303619 [Fragaria vesca subsp. vesca]	2.06589	1.38478e-67	6.14704e-66	yes	up
augustus_masked-Fvb1-2-processed-gene-79.2	PREDICTED: uncharacterized protein LOC105350957 [Fragaria vesca subsp. vesca]	-1.0052	3.88445e-11	2.37725e-10	yes	down		MSTRG.11585	PREDICTED: transmembrane protein 184 homolog DDB_G0279555 [Fragaria vesca subsp. vesca]	1.27687	1.18766e-19	1.22352e-18	yes	up
augustus_masked-Fvb2-3-processed-gene-107.0	PREDICTED: inorganic phosphate transporter 1-4 [Fragaria vesca subsp. vesca]	-1.40996	1.59747e-93	1.15329e-91	yes	down		augustus_masked-Fvb1-3-processed-gene-25.1	PREDICTED: leucine-rich repeat extensin-like protein 4 [Fragaria vesca subsp. vesca]	1.26951	0.00518425	0.0124103	yes	up
maker-Fvb3-3-augustus-gene-95.26	PREDICTED: uncharacterized protein LOC101309135 [Fragaria vesca subsp. vesca]	-2.0301	2.27228e-88	1.50033e-86	yes	down		maker-Fvb4-1-augustus-gene-102.28	PREDICTED: purple acid phosphatase 15-like [Fragaria vesca subsp. vesca]	1.09158	0.00824151	0.0189269	yes	up
MSTRG.41255	hypothetical protein RchiOBHm_Chr6g0312951 [Rosa chinensis]	-1.97852	1.60215e-09	8.6296e-09	yes	down		maker-Fvb2-3-augustus-gene-120.28	PREDICTED: aquaporin PIP2-7 [Fragaria vesca subsp. vesca]	1.79743	1.29594e-46	3.51608e-45	yes	up
maker-Fvb3-4-augustus-gene-210.29	PREDICTED: gibberellin 2-beta-dioxygenase 1-like [Fragaria vesca subsp. vesca]	-3.04932	8.5401e-82	4.98087e-80	yes	down		augustus_masked-Fvb3-2-processed-gene-10.3	PREDICTED: phospholipase A1-Igamma1, chloroplastic [Fragaria vesca subsp. vesca]	4.35207	0.00162407	0.00428328	yes	up
maker-Fvb7-2-augustus-gene-282.50	PREDICTED: MYB-like transcription factor ETC3 [Fragaria vesca subsp. vesca]	-1.69728	3.04705e-05	0.000105047	yes	down		maker-Fvb4-2-snap-gene-21.72	PREDICTED: uncharacterized protein LOC105351163 [Fragaria vesca subsp. vesca]	1.6709	4.75253e-07	2.02482e-06	yes	up
maker-Fvb4-1-augustus-gene-45.23	PREDICTED: thioredoxin X, chloroplastic [Fragaria vesca subsp. vesca]	-1.04706	2.34283e-30	3.85274e-29	yes	down		augustus_masked-Fvb1-3-processed-gene-52.10	PREDICTED: pentatricopeptide repeat-containing protein At5g66631-like isoform X1 [Fragaria vesca subsp. vesca]	1.21899	0.00648709	0.0152294	yes	up
maker-Fvb7-2-augustus-gene-185.43	PREDICTED: probable polygalacturonase [Fragaria vesca subsp. vesca]	-1.49304	1.30313e-09	7.07202e-09	yes	down		augustus_masked-Fvb1-2-processed-gene-32.19	PREDICTED: transcription repressor OFP8 [Fragaria vesca subsp. vesca]	1.44062	7.52827e-10	4.16368e-09	yes	up
maker-Fvb5-2-augustus-gene-83.30	PREDICTED: probable arabinosyltransferase ARAD2 [Fragaria vesca subsp. vesca]	-1.04784	3.08059e-08	1.47612e-07	yes	down		augustus_masked-Fvb5-1-processed-gene-115.9	PREDICTED: aspartic proteinase nepenthesin-2 [Fragaria vesca subsp. vesca]	1.67359	4.31181e-05	0.000145792	yes	up
augustus_masked-Fvb6-4-processed-gene-111.9	extensin-like [Rosa chinensis]	-2.54665	7.78672e-24	9.72029e-23	yes	down		maker-Fvb5-2-augustus-gene-97.33	PREDICTED: uncharacterized GPI-anchored protein At4g28100 [Fragaria vesca subsp. vesca]	1.09625	5.70683e-06	2.15172e-05	yes	up
maker-Fvb6-2-snap-gene-285.91	PREDICTED: uncharacterized protein LOC101314011 [Fragaria vesca subsp. vesca]	-1.07751	2.83317e-14	2.16234e-13	yes	down		maker-Fvb4-3-snap-gene-150.44	putative xyloglucan:xyloglucosyl transferase, Xyloglucan-specific endo-beta-1,4-glucanase [Rosa chinensis]	5.56114	8.85427e-238	3.68498e-235	yes	up
snap_masked-Fvb6-4-processed-gene-143.5	PREDICTED: uncharacterized protein LOC101300093 [Fragaria vesca subsp. vesca]	-1.44691	6.60504e-09	3.37091e-08	yes	down		MSTRG.48354	PREDICTED: auxin-repressed 12.5 kDa protein isoform X1 [Fragaria vesca subsp. vesca]	2.70557	4.75816e-30	7.74715e-29	yes	up
maker-Fvb6-1-augustus-gene-273.50	PREDICTED: high-light-induced protein, chloroplastic [Fragaria vesca subsp. vesca]	-1.03068	5.7462e-31	9.6815e-30	yes	down		maker-Fvb6-1-augustus-gene-118.32	PREDICTED: cytochrome P450 71A1-like [Fragaria vesca subsp. vesca]	1.65147	0.0194257	0.0409445	yes	up
maker-Fvb7-1-snap-gene-290.65	putative multi antimicrobial extrusion protein [Rosa chinensis]	-1.49221	6.10857e-27	8.7351e-26	yes	down		MSTRG.12340	putative small auxin-up RNA [Rosa chinensis]	4.11417	2.89044e-21	3.22244e-20	yes	up
augustus_masked-Fvb6-1-processed-gene-51.7	PREDICTED: protein rough sheath 2 homolog [Fragaria vesca subsp. vesca]	-1.3336	2.84085e-05	9.8344e-05	yes	down		maker-Fvb5-4-augustus-gene-85.58	PREDICTED: GEM-like protein 4 [Fragaria vesca subsp. vesca]	1.40562	7.96866e-27	1.13298e-25	yes	up
maker-Fvb6-4-augustus-gene-92.33	PREDICTED: high-light-induced protein, chloroplastic [Fragaria vesca subsp. vesca]	-1.15944	1.76513e-51	5.43703e-50	yes	down		maker-Fvb4-3-augustus-gene-11.20	PREDICTED: microtubule-associated protein TORTIFOLIA1 [Fragaria vesca subsp. vesca]	2.55637	4.70693e-17	4.24686e-16	yes	up
maker-Fvb5-3-augustus-gene-56.19	PREDICTED: pentatricopeptide repeat-containing protein At5g48730, chloroplastic [Fragaria vesca subsp. vesca]	-1.06838	0.0204584	0.0428727	yes	down		MSTRG.22273	PREDICTED: uncharacterized protein LOC105350386 [Fragaria vesca subsp. vesca]	2.30432	0.00731578	0.0169961	yes	up
maker-Fvb6-3-augustus-gene-284.20	PREDICTED: heat stress transcription factor A-3 [Fragaria vesca subsp. vesca]	-1.51242	1.70153e-24	2.18058e-23	yes	down		maker-Fvb7-2-augustus-gene-36.15	PREDICTED: LOW QUALITY PROTEIN: kynurenine 3-monooxygenase-like [Fragaria vesca subsp. vesca]	2.6376	0.000825099	0.00229266	yes	up
maker-Fvb7-1-snap-gene-266.63	PREDICTED: probable chalcone--flavonone isomerase 3 [Fragaria vesca subsp. vesca]	-3.73803	1.23473e-218	4.23751e-216	yes	down		maker-Fvb3-1-augustus-gene-285.43	PREDICTED: xyloglucan endotransglucosylase/hydrolase 2-like [Fragaria vesca subsp. vesca]	5.99242	1.5922e-09	8.57752e-09	yes	up
maker-Fvb4-3-augustus-gene-93.53	PREDICTED: protein TRANSPARENT TESTA 12-like [Fragaria vesca subsp. vesca]	-1.11023	1.14072e-41	2.69022e-40	yes	down		maker-Fvb7-3-augustus-gene-67.59	PREDICTED: uncharacterized protein LOC101311909 [Fragaria vesca subsp. vesca]	1.48812	2.97885e-11	1.83832e-10	yes	up
MSTRG.28870	hypothetical protein RchiOBHm_Chr1g0340821 [Rosa chinensis]	-1.60485	0.000917773	0.00252908	yes	down		snap_masked-Fvb5-1-processed-gene-197.36	auxin-induced protein 15A-like [Rosa chinensis]	4.65308	0.00640848	0.0150617	yes	up
maker-Fvb1-1-augustus-gene-104.21	PREDICTED: uncharacterized protein LOC101309584 [Fragaria vesca subsp. vesca]	-1.07081	7.39449e-18	6.94989e-17	yes	down		maker-Fvb6-3-augustus-gene-55.44	PREDICTED: zinc finger CCCH domain-containing protein 13 isoform X1 [Fragaria vesca subsp. vesca]	1.18024	2.19324e-29	3.47862e-28	yes	up
maker-Fvb2-4-snap-gene-142.47	PREDICTED: cytochrome P450 CYP82D47-like [Fragaria vesca subsp. vesca]	-2.41511	0.00335724	0.00835097	yes	down		MSTRG.21038	PREDICTED: uncharacterized protein At1g10890 isoform X2 [Fragaria vesca subsp. vesca]	1.68187	3.43012e-106	3.10215e-104	yes	up
maker-Fvb2-2-augustus-gene-212.23	nucleobase-ascorbate transporter 4 [Rosa chinensis]	-3.57849	0.00674271	0.0157779	yes	down		maker-Fvb2-3-snap-gene-63.75	PREDICTED: uncharacterized protein LOC101307170 [Fragaria vesca subsp. vesca]	1.1655	3.74562e-24	4.73484e-23	yes	up
maker-Fvb7-4-augustus-gene-24.70	PREDICTED: homeobox-leucine zipper protein HDG1 isoform X1 [Fragaria vesca subsp. vesca]	-1.15986	0.00254437	0.0064806	yes	down		maker-Fvb6-1-augustus-gene-228.28	PREDICTED: UPF0554 protein C2orf43 homolog isoform X1 [Fragaria vesca subsp. vesca]	1.01295	4.71341e-08	2.22159e-07	yes	up
maker-Fvb2-3-augustus-gene-19.45	PREDICTED: photosystem II 22 kDa protein, chloroplastic [Fragaria vesca subsp. vesca]	-1.68456	4.0459e-139	5.51298e-137	yes	down		snap_masked-Fvb7-2-processed-gene-0.13	PREDICTED: uncharacterized protein LOC105352787 [Fragaria vesca subsp. vesca]	5.1834	5.03349e-08	2.36772e-07	yes	up
maker-Fvb7-2-augustus-gene-280.61	PREDICTED: protein TRANSPARENT TESTA 12-like [Fragaria vesca subsp. vesca]	-1.61207	1.29756e-50	3.87987e-49	yes	down		augustus_masked-Fvb4-2-processed-gene-169.3	probable pre-mRNA-splicing factor ATP-dependent RNA helicase DEAH5 isoform X1 [Rosa chinensis]	4.29283	0.0150199	0.0325152	yes	up
maker-Fvb6-1-augustus-gene-38.56	PREDICTED: SPX domain-containing protein 4 [Fragaria vesca subsp. vesca]	-1.78679	2.88891e-09	1.52453e-08	yes	down		augustus_masked-Fvb5-1-processed-gene-296.8	PREDICTED: protein YLS9-like [Fragaria vesca subsp. vesca]	2.9827	5.69123e-11	3.44198e-10	yes	up
augustus_masked-Fvb3-2-processed-gene-41.5	PREDICTED: abscisic acid receptor PYL12-like [Fragaria vesca subsp. vesca]	-1.47671	1.48373e-43	3.70333e-42	yes	down		maker-Fvb3-3-augustus-gene-94.26	basic leucine zipper 34-like [Rosa chinensis]	2.50838	1.49083e-16	1.30566e-15	yes	up
maker-Fvb3-2-augustus-gene-102.34	PREDICTED: ribosome biogenesis protein BRX1 [Fragaria vesca subsp. vesca]	-1.1301	1.89275e-05	6.70909e-05	yes	down		MSTRG.67154	PREDICTED: vacuolar protein sorting-associated protein 36 [Fragaria vesca subsp. vesca]	1.69342	2.40403e-17	2.2032e-16	yes	up
maker-Fvb7-1-snap-gene-114.38	SOC1-like protein [Fragaria vesca]	-1.17195	2.50273e-14	1.9165e-13	yes	down		augustus_masked-Fvb5-4-processed-gene-243.15	PREDICTED: U11/U12 small nuclear ribonucleoprotein 48 kDa protein [Fragaria vesca subsp. vesca]	1.21218	6.89958e-07	2.88846e-06	yes	up
maker-Fvb2-4-augustus-gene-253.46	PREDICTED: prostaglandin E synthase 2-like [Fragaria vesca subsp. vesca]	-1.9029	1.44112e-22	1.7092e-21	yes	down		maker-Fvb7-3-augustus-gene-106.33	WRKY transcription factor 51 [Fragaria vesca]	1.49303	1.02269e-30	1.70558e-29	yes	up
maker-Fvb2-1-augustus-gene-167.45	PREDICTED: indole-3-acetic acid-induced protein ARG2 [Fragaria vesca subsp. vesca]	-1.93108	2.59511e-180	5.7934e-178	yes	down		snap_masked-Fvb3-4-processed-gene-272.40	PREDICTED: ribulose bisphosphate carboxylase/oxygenase activase, chloroplastic-like [Fragaria vesca subsp. vesca]	1.17651	5.60915e-10	3.13545e-09	yes	up
maker-Fvb1-1-snap-gene-266.72	PREDICTED: uncharacterized protein LOC101297283 [Fragaria vesca subsp. vesca]	-2.1058	1.68695e-63	6.91749e-62	yes	down		snap_masked-Fvb6-3-processed-gene-435.31	PREDICTED: abscisic acid receptor PYL4 [Fragaria vesca subsp. vesca]	4.26424	1.3033e-21	1.47553e-20	yes	up
maker-Fvb6-3-augustus-gene-236.33	PREDICTED: BEL1-like homeodomain protein 1 [Fragaria vesca subsp. vesca]	-1.11217	2.49527e-53	8.0528e-52	yes	down		snap_masked-Fvb2-4-processed-gene-148.20	PREDICTED: uncharacterized protein LOC101315365 [Fragaria vesca subsp. vesca]	1.69235	1.00266e-05	3.67356e-05	yes	up
maker-Fvb6-2-augustus-gene-205.37	PREDICTED: RNA polymerase II C-terminal domain phosphatase-like 2 [Fragaria vesca subsp. vesca]	-1.23316	7.13243e-25	9.32631e-24	yes	down		snap_masked-Fvb2-3-processed-gene-30.14	PREDICTED: J domain-containing protein required for chloroplast accumulation response 1 [Fragaria vesca subsp. vesca]	1.12549	8.58494e-62	3.39617e-60	yes	up
maker-Fvb2-4-augustus-gene-155.49	PREDICTED: tyrosine decarboxylase 1 [Fragaria vesca subsp. vesca]	-2.3304	0.00678264	0.0158609	yes	down		maker-Fvb3-4-snap-gene-69.49	PREDICTED: heat stress transcription factor A-7a [Fragaria vesca subsp. vesca]	1.62735	1.03737e-33	1.89877e-32	yes	up
maker-Fvb4-2-augustus-gene-32.56	PREDICTED: uncharacterized protein LOC101293189 [Fragaria vesca subsp. vesca]	-1.6674	6.39101e-165	1.20209e-162	yes	down		maker-Fvb3-1-augustus-gene-50.36	PREDICTED: serine/arginine-rich splicing factor SR45a isoform X1 [Fragaria vesca subsp. vesca]	1.72767	6.33398e-77	3.3271e-75	yes	up
MSTRG.43361	PREDICTED: uncharacterized protein LOC101299089 isoform X2 [Fragaria vesca subsp. vesca]	-1.09674	1.14714e-67	5.09707e-66	yes	down		MSTRG.41447	hypothetical protein PRUPE_5G198900 [Prunus persica]	1.52071	7.26884e-34	1.33712e-32	yes	up
augustus_masked-Fvb5-3-processed-gene-223.15	PREDICTED: WAT1-related protein At3g30340-like [Fragaria vesca subsp. vesca]	-1.97644	0.00161496	0.00426107	yes	down		maker-Fvb2-2-snap-gene-206.34	PREDICTED: probable E3 ubiquitin-protein ligase ARI10 [Fragaria vesca subsp. vesca]	1.82658	0.00462945	0.0111914	yes	up
maker-Fvb2-1-augustus-gene-44.18	PREDICTED: glucan endo-1,3-beta-D-glucosidase [Fragaria vesca subsp. vesca]	-1.12448	1.0553e-06	4.32297e-06	yes	down		maker-Fvb2-2-augustus-gene-229.37	PREDICTED: plant intracellular Ras-group-related LRR protein 9-like [Fragaria vesca subsp. vesca]	1.66591	4.72257e-06	1.79935e-05	yes	up
augustus_masked-Fvb5-2-processed-gene-225.10	PREDICTED: isoamylase 3, chloroplastic [Fragaria vesca subsp. vesca]	-2.33114	4.69696e-190	1.13686e-187	yes	down		maker-Fvb6-2-augustus-gene-194.36	PREDICTED: laccase-17-like [Fragaria vesca subsp. vesca]	1.6082	3.78207e-05	0.000128818	yes	up
augustus_masked-Fvb5-2-processed-gene-231.4	PREDICTED: 14-3-3 protein 7-like [Fragaria vesca subsp. vesca]	-1.60058	3.32101e-32	5.82371e-31	yes	down		maker-Fvb5-1-snap-gene-125.54	PREDICTED: fructose-1,6-bisphosphatase, cytosolic-like [Fragaria vesca subsp. vesca]	2.16038	8.43448e-08	3.88409e-07	yes	up
maker-Fvb2-1-augustus-gene-47.15	PREDICTED: uncharacterized protein LOC101314035 [Fragaria vesca subsp. vesca]	-1.74894	3.50587e-24	4.43727e-23	yes	down		maker-Fvb2-2-snap-gene-46.74	PREDICTED: septin and tuftelin-interacting protein 1 homolog 1-like [Fragaria vesca subsp. vesca]	2.07455	9.63472e-43	2.34745e-41	yes	up
MSTRG.28004	PREDICTED: 26S proteasome non-ATPase regulatory subunit 10 [Fragaria vesca subsp. vesca]	-1.16073	8.8428e-83	5.25404e-81	yes	down		snap_masked-Fvb3-2-processed-gene-283.29	PREDICTED: phytoene dehydrogenase, chloroplastic/chromoplastic [Fragaria vesca subsp. vesca]	1.24132	6.75195e-18	6.35962e-17	yes	up
maker-Fvb5-1-snap-gene-206.49	PREDICTED: F-box protein At1g47056-like [Fragaria vesca subsp. vesca]	-1.98651	1.3086e-110	1.24211e-108	yes	down		maker-Fvb5-1-augustus-gene-53.50	PREDICTED: magnesium protoporphyrin IX methyltransferase, chloroplastic [Fragaria vesca subsp. vesca]	1.0388	5.91839e-19	5.8855e-18	yes	up
MSTRG.61027	PREDICTED: uncharacterized protein LOC101305980 [Fragaria vesca subsp. vesca]	-1.14241	7.88661e-14	5.85502e-13	yes	down		maker-Fvb6-2-snap-gene-75.72	PREDICTED: uncharacterized protein LOC101315164 [Fragaria vesca subsp. vesca]	1.96321	2.41846e-38	5.13007e-37	yes	up
maker-Fvb3-4-augustus-gene-246.49	PREDICTED: squamosa promoter-binding-like protein 3 [Fragaria vesca subsp. vesca]	-1.1465	3.43559e-10	1.95406e-09	yes	down		augustus_masked-Fvb2-2-processed-gene-38.1	PREDICTED: gibberellin 3-beta-dioxygenase 1-like [Fragaria vesca subsp. vesca]	2.98163	0.021569	0.0449152	yes	up
MSTRG.42720	putative transcription factor C2H2 family [Rosa chinensis]	-4.85718	0.000313415	0.000932661	yes	down		maker-Fvb3-4-augustus-gene-108.39	PREDICTED: uncharacterized protein LOC101299937 [Fragaria vesca subsp. vesca]	1.70228	1.40453e-31	2.41464e-30	yes	up
maker-Fvb7-2-augustus-gene-274.62	PREDICTED: low-temperature-induced 65 kDa protein isoform X7 [Fragaria vesca subsp. vesca]	-6.25685	1.32872e-101	1.09704e-99	yes	down		maker-Fvb1-1-snap-gene-203.43	PREDICTED: oxysterol-binding protein-related protein 3B [Fragaria vesca subsp. vesca]	1.33146	3.87285e-13	2.7426e-12	yes	up
maker-Fvb4-2-augustus-gene-22.52	PREDICTED: kirola-like [Fragaria vesca subsp. vesca]	-1.19282	1.08014e-60	4.17598e-59	yes	down		augustus_masked-Fvb5-4-processed-gene-234.6	PREDICTED: VID27-like protein [Fragaria vesca subsp. vesca]	1.03003	7.45106e-05	0.000243938	yes	up
maker-Fvb1-1-augustus-gene-236.48	PREDICTED: thiol protease aleurain-like [Fragaria vesca subsp. vesca]	-1.57749	1.1473e-128	1.38302e-126	yes	down		maker-Fvb2-3-augustus-gene-13.40	PREDICTED: endoglucanase 17 [Fragaria vesca subsp. vesca]	2.92461	6.56809e-21	7.20719e-20	yes	up
maker-Fvb6-2-snap-gene-159.27	PREDICTED: protein ROS1 [Fragaria vesca subsp. vesca]	-1.91155	0.00278707	0.00704473	yes	down		MSTRG.5939	proline-rich receptor-like protein kinase PERK1 [Prunus persica]	1.12048	2.85511e-09	1.50738e-08	yes	up
augustus_masked-Fvb4-1-processed-gene-42.5	PREDICTED: serine carboxypeptidase-like 13 [Fragaria vesca subsp. vesca]	-1.90132	5.73815e-81	3.26591e-79	yes	down		augustus_masked-Fvb3-1-processed-gene-309.3	PREDICTED: uncharacterized protein LOC101291898 [Fragaria vesca subsp. vesca]	1.76354	8.519e-37	1.73082e-35	yes	up
maker-Fvb1-3-augustus-gene-25.43	PREDICTED: probable strigolactone esterase D14 homolog [Fragaria vesca subsp. vesca]	-1.04195	6.7641e-24	8.46787e-23	yes	down		maker-Fvb7-3-augustus-gene-109.46	PREDICTED: BAG family molecular chaperone regulator 6 isoform X1 [Fragaria vesca subsp. vesca]	1.11102	5.82065e-09	2.98517e-08	yes	up
MSTRG.52736	PREDICTED: protein FAR1-RELATED SEQUENCE 3-like [Fragaria vesca subsp. vesca]	-1.37778	5.21999e-14	3.92506e-13	yes	down		maker-Fvb6-4-snap-gene-154.39	PREDICTED: peptidyl-prolyl cis-trans isomerase FKBP43 isoform X1 [Fragaria vesca subsp. vesca]	1.11151	7.98728e-06	2.96129e-05	yes	up
maker-Fvb4-3-augustus-gene-114.43	PREDICTED: uncharacterized protein LOC101300714 [Fragaria vesca subsp. vesca]	-1.01679	0.000368375	0.00108414	yes	down		maker-Fvb3-2-augustus-gene-83.21	PREDICTED: probable potassium transporter 13 isoform X1 [Fragaria vesca subsp. vesca]	1.67176	7.80435e-30	1.26109e-28	yes	up
maker-Fvb6-4-augustus-gene-3.47	PREDICTED: uncharacterized protein LOC101309568 [Fragaria vesca subsp. vesca]	-1.47826	8.45235e-84	5.16897e-82	yes	down		MSTRG.23256	subtilisin-like protease SBT5.3 isoform X1 [Rosa chinensis]	3.10352	0.000618509	0.0017538	yes	up
maker-Fvb6-1-snap-gene-156.48	PREDICTED: palmitoyl-monogalactosyldiacylglycerol delta-7 desaturase, chloroplastic [Fragaria vesca subsp. vesca]	-1.10463	5.75897e-47	1.57598e-45	yes	down		maker-Fvb7-1-snap-gene-264.89	PREDICTED: uncharacterized protein LOC105351439 [Fragaria vesca subsp. vesca]	1.19749	3.48918e-05	0.000119288	yes	up
maker-Fvb1-2-snap-gene-22.60	PREDICTED: uncharacterized protein LOC101291956 [Fragaria vesca subsp. vesca]	-1.97963	1.13331e-31	1.95421e-30	yes	down		maker-Fvb7-1-augustus-gene-55.27	PREDICTED: 60S ribosomal protein L7a-2-like [Fragaria vesca subsp. vesca]	1.03131	0.000612918	0.00173956	yes	up
maker-Fvb2-4-augustus-gene-108.19	PREDICTED: protein TRANSPARENT TESTA 12-like [Fragaria vesca subsp. vesca]	-1.49551	0.0229581	0.0474579	yes	down		maker-Fvb6-1-snap-gene-13.90	PREDICTED: sister chromatid cohesion 1 protein 2-like isoform X2 [Fragaria vesca subsp. vesca]	1.65902	0.0145359	0.0315692	yes	up
maker-Fvb2-1-snap-gene-56.44	PREDICTED: probable DNA helicase MCM9 [Fragaria vesca subsp. vesca]	-1.60077	4.65853e-13	3.28005e-12	yes	down		maker-Fvb3-2-augustus-gene-14.55	PREDICTED: beta-galactosidase 8-like [Fragaria vesca subsp. vesca]	1.64522	2.55999e-19	2.59515e-18	yes	up
maker-Fvb7-2-augustus-gene-122.13	PREDICTED: uncharacterized protein LOC101305879 [Fragaria vesca subsp. vesca]	-1.09178	1.40767e-36	2.83185e-35	yes	down		maker-Fvb3-4-augustus-gene-53.52	PREDICTED: uncharacterized protein LOC101304409 [Fragaria vesca subsp. vesca]	1.62588	1.32675e-23	1.63863e-22	yes	up
maker-Fvb3-2-augustus-gene-197.28	nudix hydrolase 10-like isoform X1 [Rosa chinensis]	-1.87566	1.41907e-112	1.3841e-110	yes	down		maker-Fvb7-2-augustus-gene-294.46	PREDICTED: putative disease resistance protein RGA3 [Fragaria vesca subsp. vesca]	1.19649	9.03592e-57	3.18181e-55	yes	up
maker-Fvb6-1-snap-gene-293.79	PREDICTED: lactosylceramide 4-alpha-galactosyltransferase-like [Fragaria vesca subsp. vesca]	-2.10262	2.57258e-200	7.04214e-198	yes	down		maker-Fvb5-3-augustus-gene-161.50	PREDICTED: flavonol synthase 3-like [Fragaria vesca subsp. vesca]	1.41886	1.62579e-06	6.52272e-06	yes	up
augustus_masked-Fvb7-3-processed-gene-99.1	PREDICTED: uncharacterized protein LOC101302488 [Fragaria vesca subsp. vesca]	-1.35625	7.12049e-51	2.15432e-49	yes	down		maker-Fvb2-3-augustus-gene-239.55	PREDICTED: LOW QUALITY PROTEIN: ATP-dependent Clp protease ATP-binding subunit clpX-like, mitochondrial [Fragaria vesca subsp. vesca]	1.60673	8.5229e-36	1.66504e-34	yes	up
maker-Fvb6-1-augustus-gene-80.45	PREDICTED: UDP-arabinose 4-epimerase 1-like [Fragaria vesca subsp. vesca]	-1.22339	1.17468e-18	1.15171e-17	yes	down		maker-Fvb6-3-snap-gene-261.19	uncharacterized protein LOC112193109 [Rosa chinensis]	2.00044	0.000426654	0.00124301	yes	up
maker-Fvb4-2-snap-gene-50.70	PREDICTED: amino-acid permease BAT1 homolog isoform X2 [Fragaria vesca subsp. vesca]	-1.11467	1.50396e-21	1.69666e-20	yes	down		maker-Fvb6-2-snap-gene-321.46	PREDICTED: ankyrin repeat-containing protein At3g12360-like [Fragaria vesca subsp. vesca]	3.57599	0.0212791	0.0443772	yes	up
maker-Fvb2-3-augustus-gene-159.31	PREDICTED: kinesin-like protein NACK1 [Fragaria vesca subsp. vesca]	-1.19288	1.80497e-36	3.62396e-35	yes	down		maker-Fvb7-3-augustus-gene-72.47	PREDICTED: uncharacterized protein LOC101311801 [Fragaria vesca subsp. vesca]	1.31343	5.39871e-10	3.02259e-09	yes	up
augustus_masked-Fvb7-2-processed-gene-140.3	PREDICTED: ras-related protein RABC2a-like [Fragaria vesca subsp. vesca]	-3.62884	0.00430641	0.0104738	yes	down		maker-Fvb6-3-augustus-gene-62.25	PREDICTED: triacylglycerol lipase 2-like [Fragaria vesca subsp. vesca]	1.26605	2.55137e-20	2.71132e-19	yes	up
MSTRG.64402	PREDICTED: uncharacterized protein LOC101302781 [Fragaria vesca subsp. vesca]	-1.21522	4.84003e-30	7.87626e-29	yes	down		maker-Fvb2-1-augustus-gene-234.67	PREDICTED: D-amino-acid transaminase, chloroplastic-like [Fragaria vesca subsp. vesca]	1.08036	1.06028e-10	6.28674e-10	yes	up
MSTRG.14380	PREDICTED: bZIP transcription factor TRAB1 [Fragaria vesca subsp. vesca]	-1.43548	6.37803e-48	1.79122e-46	yes	down		maker-Fvb1-1-augustus-gene-179.33	PREDICTED: putative formamidase C869.04 isoform X2 [Fragaria vesca subsp. vesca]	1.59361	1.80681e-131	2.24268e-129	yes	up
augustus_masked-Fvb7-2-processed-gene-206.6	PREDICTED: ras-related protein RABC2a-like [Fragaria vesca subsp. vesca]	-3.5025	4.15243e-06	1.59235e-05	yes	down		maker-Fvb7-4-augustus-gene-41.55	PREDICTED: transcription factor SCREAM2 isoform X1 [Fragaria vesca subsp. vesca]	2.80359	1.00281e-25	1.36038e-24	yes	up
maker-Fvb3-4-augustus-gene-268.49	PREDICTED: CBS domain-containing protein CBSX5-like [Fragaria vesca subsp. vesca]	-1.95744	2.47638e-26	3.44268e-25	yes	down		augustus_masked-Fvb7-2-processed-gene-265.19	PREDICTED: 21 kDa protein-like [Fragaria vesca subsp. vesca]	3.36366	7.9734e-12	5.1399e-11	yes	up
MSTRG.35968	PREDICTED: S-adenosylmethionine carrier 1, chloroplastic/mitochondrial [Fragaria vesca subsp. vesca]	-1.05853	8.46554e-09	4.27935e-08	yes	down		maker-Fvb1-4-augustus-gene-184.23	PREDICTED: condensin complex subunit 3 isoform X1 [Fragaria vesca subsp. vesca]	1.58805	5.15057e-05	0.000172384	yes	up
augustus_masked-Fvb2-4-processed-gene-198.17	PREDICTED: uncharacterized protein LOC101291591 [Fragaria vesca subsp. vesca]	-1.10633	0.0199456	0.0419069	yes	down		MSTRG.62022	PREDICTED: putative nuclease HARBI1 [Fragaria vesca subsp. vesca]	2.93955	0.00148764	0.00394827	yes	up
snap_masked-Fvb2-1-processed-gene-190.26	lipid transfer protein EARLI 1-like [Rosa chinensis]	-1.15665	1.2213e-53	3.97487e-52	yes	down		maker-Fvb7-4-snap-gene-115.61	PREDICTED: LOW QUALITY PROTEIN: uncharacterized protein LOC101299041 [Fragaria vesca subsp. vesca]	1.08828	0.000474262	0.00137258	yes	up
snap_masked-Fvb1-2-processed-gene-47.28	PREDICTED: cysteine-rich receptor-like protein kinase 7 [Fragaria vesca subsp. vesca]	-1.36974	6.97078e-14	5.19482e-13	yes	down		MSTRG.1312	PREDICTED: putative pectinesterase/pectinesterase inhibitor 45 [Fragaria vesca subsp. vesca]	1.00274	7.00293e-14	5.21793e-13	yes	up
maker-Fvb6-2-augustus-gene-206.37	PREDICTED: vacuolar cation/proton exchanger 3-like [Fragaria vesca subsp. vesca]	-1.85652	0.000355384	0.00104876	yes	down		augustus_masked-Fvb6-2-processed-gene-77.11	PREDICTED: F-box/LRR-repeat MAX2 homolog A [Fragaria vesca subsp. vesca]	2.73445	2.25172e-50	6.70675e-49	yes	up
maker-Fvb7-2-augustus-gene-233.62	PREDICTED: glycine-rich protein A3-like [Fragaria vesca subsp. vesca]	-2.5201	3.04599e-159	5.35674e-157	yes	down		maker-Fvb3-4-augustus-gene-244.37	PREDICTED: uncharacterized protein LOC101296267 [Fragaria vesca subsp. vesca]	2.51792	0.000307418	0.000916058	yes	up
maker-Fvb1-2-augustus-gene-158.27	PREDICTED: probable acyl-[acyl-carrier-protein]--UDP-N-acetylglucosamine O-acyltransferase, mitochondrial [Fragaria vesca subsp. vesca]	-1.23138	9.37205e-09	4.71582e-08	yes	down		augustus_masked-Fvb5-2-processed-gene-73.9	PREDICTED: uncharacterized protein LOC105351506 [Fragaria vesca subsp. vesca]	1.11935	3.57272e-05	0.000122008	yes	up
augustus_masked-Fvb4-4-processed-gene-50.11	PREDICTED: uncharacterized protein LOC105351469 [Fragaria vesca subsp. vesca]	-3.19633	0.00182257	0.00475987	yes	down		maker-Fvb2-4-snap-gene-150.40	uncharacterized protein LOC112198748 [Rosa chinensis]	1.65982	0.00375242	0.00923881	yes	up
MSTRG.42442	PREDICTED: proline-rich receptor-like protein kinase PERK2 [Prunus mume]	-1.26592	0.00350218	0.0086756	yes	down		maker-Fvb5-1-augustus-gene-242.31	PREDICTED: mitochondrial outer membrane protein porin of 36 kDa-like [Fragaria vesca subsp. vesca]	1.72492	1.82559e-39	4.01413e-38	yes	up
snap_masked-Fvb4-4-processed-gene-155.18	PREDICTED: 15-cis-zeta-carotene isomerase, chloroplastic [Fragaria vesca subsp. vesca]	-1.98224	1.39244e-61	5.48484e-60	yes	down		augustus_masked-Fvb3-2-processed-gene-171.4	PREDICTED: protein YLS9-like [Fragaria vesca subsp. vesca]	1.22848	0.0119537	0.0264743	yes	up
augustus_masked-Fvb6-3-processed-gene-30.1	PREDICTED: zinc-finger homeodomain protein 9 [Fragaria vesca subsp. vesca]	-1.33246	3.93516e-19	3.95088e-18	yes	down		MSTRG.29256	hypothetical protein PRUPE_7G228500 [Prunus persica]	2.92026	9.51888e-08	4.35967e-07	yes	up
maker-Fvb5-1-augustus-gene-41.62	PREDICTED: ferric reduction oxidase 8, mitochondrial [Fragaria vesca subsp. vesca]	-1.0108	9.45873e-27	1.33863e-25	yes	down		maker-Fvb3-2-augustus-gene-133.44	PREDICTED: disease resistance protein At4g27190-like [Fragaria vesca subsp. vesca]	1.51207	0.00136195	0.00363914	yes	up
maker-Fvb2-2-augustus-gene-225.49	PREDICTED: heavy metal-associated isoprenylated plant protein 26 [Fragaria vesca subsp. vesca]	-1.49389	2.27282e-46	6.12856e-45	yes	down		augustus_masked-Fvb6-1-processed-gene-168.1	PREDICTED: uncharacterized protein LOC101308787 isoform X1 [Fragaria vesca subsp. vesca]	2.07019	1.57902e-07	7.04871e-07	yes	up
snap_masked-Fvb2-4-processed-gene-261.41	PREDICTED: elongation of fatty acids protein 3-like [Fragaria vesca subsp. vesca]	-1.17722	0.023023	0.047575	yes	down		MSTRG.59222	PREDICTED: LOW QUALITY PROTEIN: uncharacterized protein LOC101304315 [Fragaria vesca subsp. vesca]	2.0126	0.00613777	0.014479	yes	up
augustus_masked-Fvb5-2-processed-gene-125.10	--	-1.34039	4.72766e-44	1.19295e-42	yes	down		augustus_masked-Fvb6-2-processed-gene-286.7	PREDICTED: uncharacterized protein LOC101305399 [Fragaria vesca subsp. vesca]	4.10024	0.00559785	0.0133137	yes	up
maker-Fvb6-3-augustus-gene-299.26	PREDICTED: carotene epsilon-monooxygenase, chloroplastic isoform X1 [Fragaria vesca subsp. vesca]	-1.05993	1.47599e-42	3.57534e-41	yes	down		maker-Fvb7-2-snap-gene-204.55	PREDICTED: NAC domain-containing protein 4-like isoform X1 [Fragaria vesca subsp. vesca]	3.86111	7.68713e-08	3.55221e-07	yes	up
snap_masked-Fvb3-2-processed-gene-163.21	PREDICTED: ferredoxin, root R-B1 [Fragaria vesca subsp. vesca]	-1.10056	2.91794e-19	2.94859e-18	yes	down		augustus_masked-Fvb2-1-processed-gene-24.5	PREDICTED: transcription factor MYB44-like [Fragaria vesca subsp. vesca]	4.05748	2.95232e-10	1.68808e-09	yes	up
maker-Fvb1-2-augustus-gene-104.28	PREDICTED: F-box protein At5g67140 [Fragaria vesca subsp. vesca]	-1.23166	2.41951e-41	5.64528e-40	yes	down		MSTRG.23843	hypothetical protein RchiOBHm_Chr1g0379961 [Rosa chinensis]	1.84591	1.09493e-36	2.21286e-35	yes	up
augustus_masked-Fvb5-1-processed-gene-130.17	PREDICTED: LRR receptor-like serine/threonine-protein kinase EFR [Fragaria vesca subsp. vesca]	-2.64796	5.98434e-05	0.000198663	yes	down		augustus_masked-Fvb2-1-processed-gene-209.10	heat shock transcription factor protein 2 [Fragaria x ananassa]	1.01793	1.1193e-28	1.72213e-27	yes	up
augustus_masked-Fvb1-3-processed-gene-98.7	PREDICTED: uncharacterized protein LOC101300093 [Fragaria vesca subsp. vesca]	-2.46232	5.70664e-08	2.67193e-07	yes	down		augustus_masked-Fvb6-2-processed-gene-39.4	PREDICTED: chlorophyll a-b binding protein of LHCII type 1-like [Fragaria vesca subsp. vesca]	2.26846	1.6902e-11	1.06194e-10	yes	up
maker-Fvb6-3-snap-gene-242.44	PREDICTED: uncharacterized protein LOC101314295 [Fragaria vesca subsp. vesca]	-1.14141	0.0001956	0.000600444	yes	down		maker-Fvb3-4-snap-gene-89.52	G-type lectin S-receptor-like serine/threonine-protein kinase At4g27290 isoform X1 [Prunus persica]	1.11326	0.017908	0.0380905	yes	up
maker-Fvb6-2-augustus-gene-234.37	PREDICTED: F-box protein PP2-B15-like isoform X1 [Fragaria vesca subsp. vesca]	-1.57462	1.20791e-18	1.18405e-17	yes	down		MSTRG.49920	PREDICTED: receptor-like protein 12 isoform X3 [Fragaria vesca subsp. vesca]	1.3996	8.49206e-05	0.000275781	yes	up
maker-Fvb6-1-augustus-gene-337.52	PREDICTED: bifunctional 3-dehydroquinate dehydratase/shikimate dehydrogenase, chloroplastic-like [Fragaria vesca subsp. vesca]	-2.57523	1.95762e-190	4.78866e-188	yes	down		maker-Fvb2-3-snap-gene-156.43	uncharacterized protein LOC110746202 [Prunus avium]	2.74542	1.22769e-17	1.14093e-16	yes	up
maker-Fvb5-3-snap-gene-244.48	PREDICTED: probable LRR receptor-like serine/threonine-protein kinase At4g26540 [Fragaria vesca subsp. vesca]	-2.6186	4.64155e-08	2.18929e-07	yes	down		maker-Fvb6-3-augustus-gene-347.43	PREDICTED: uncharacterized protein LOC101312742 [Fragaria vesca subsp. vesca]	1.19392	1.20586e-13	8.84942e-13	yes	up
snap_masked-Fvb5-2-processed-gene-113.30	PREDICTED: downF0676 protein C1494.01-like [Fragaria vesca subsp. vesca]	-1.00226	1.02477e-30	1.70875e-29	yes	down		augustus_masked-Fvb5-4-processed-gene-149.3	PREDICTED: putative DNA-binding protein ESCAROLA [Fragaria vesca subsp. vesca]	1.86618	1.04857e-06	4.29707e-06	yes	up
maker-Fvb7-2-snap-gene-39.69	PREDICTED: probable receptor-like protein kinase At1g67000 isoform X2 [Fragaria vesca subsp. vesca]	-1.09681	7.46837e-17	6.66063e-16	yes	down		maker-Fvb2-2-snap-gene-104.55	PREDICTED: lysine histidine transporter-like 7 [Fragaria vesca subsp. vesca]	1.03416	3.71296e-32	6.49988e-31	yes	up
MSTRG.55919	hypothetical protein RchiOBHm_Chr3g0465101 [Rosa chinensis]	-1.11359	3.31625e-06	1.2884e-05	yes	down		MSTRG.9311	PREDICTED: uncharacterized protein LOC101297153 [Fragaria vesca subsp. vesca]	1.23786	9.88055e-06	3.62408e-05	yes	up
maker-Fvb5-4-augustus-gene-36.73	PREDICTED: quinolinate synthase, chloroplastic [Fragaria vesca subsp. vesca]	-1.07263	0.000764409	0.00213733	yes	down		maker-Fvb4-2-augustus-gene-111.28	PREDICTED: pentatricopeptide repeat-containing protein At5g19020, mitochondrial [Fragaria vesca subsp. vesca]	1.1216	5.8832e-06	2.21513e-05	yes	up
augustus_masked-Fvb6-4-processed-gene-275.7	PREDICTED: uncharacterized protein LOC101308986 [Fragaria vesca subsp. vesca]	-1.62874	0.00174384	0.00457151	yes	down		maker-Fvb7-1-augustus-gene-178.47	PREDICTED: probable serine/threonine-protein kinase At1g01540 [Fragaria vesca subsp. vesca]	1.44177	2.39673e-49	6.96279e-48	yes	up
maker-Fvb3-2-snap-gene-115.68	PREDICTED: transcription factor TCP4 [Fragaria vesca subsp. vesca]	-1.06374	1.65708e-24	2.12657e-23	yes	down		maker-Fvb2-2-augustus-gene-193.22	PREDICTED: probable receptor-like protein kinase At1g49730 [Fragaria vesca subsp. vesca]	1.05002	3.11994e-25	4.13427e-24	yes	up
maker-Fvb2-4-augustus-gene-153.57	PREDICTED: protein LOW PSII ACCUMULATION 1, chloroplastic [Fragaria vesca subsp. vesca]	-1.32135	1.20555e-78	6.56882e-77	yes	down		maker-Fvb3-3-augustus-gene-33.44	linoleate 13S-lipoxygenase 3-1, chloroplastic-like isoform X1 [Rosa chinensis]	1.90985	3.10821e-06	1.21177e-05	yes	up
snap_masked-Fvb6-4-processed-gene-341.56	PREDICTED: ribonucleoside-diphosphate reductase small chain [Fragaria vesca subsp. vesca]	-1.10947	0.00297405	0.00747196	yes	down		snap_masked-Fvb1-3-processed-gene-20.39	PREDICTED: probable protein ABIL5 [Fragaria vesca subsp. vesca]	1.05156	9.79709e-05	0.000315058	yes	up
maker-Fvb6-1-snap-gene-136.44	PREDICTED: ABC transporter G family member 29 [Fragaria vesca subsp. vesca]	-1.73025	7.44451e-17	6.64064e-16	yes	down		MSTRG.8173	PREDICTED: LYR motif-containing protein At3g19508 [Fragaria vesca subsp. vesca]	1.28116	5.6655e-07	2.39362e-06	yes	up
maker-Fvb7-1-augustus-gene-307.63	PREDICTED: reticulon-like protein B2 [Fragaria vesca subsp. vesca]	-1.61733	0.0158888	0.034199	yes	down		augustus_masked-Fvb6-2-processed-gene-150.4	PREDICTED: uncharacterized protein LOC101291844 [Fragaria vesca subsp. vesca]	1.30006	0.000297723	0.000888983	yes	up
maker-Fvb1-3-augustus-gene-70.17	PREDICTED: dehydrin Xero 2 [Fragaria vesca subsp. vesca]	-3.22515	8.90317e-69	4.04784e-67	yes	down		maker-Fvb1-1-augustus-gene-105.22	PREDICTED: probable glycosyltransferase At5g03795 [Fragaria vesca subsp. vesca]	1.52205	7.80936e-43	1.90675e-41	yes	up
maker-Fvb6-4-augustus-gene-127.28	PREDICTED: 1,4-alpha-glucan-branching enzyme 1, chloroplastic/amyloplastic [Fragaria vesca subsp. vesca]	-1.11748	1.12427e-66	4.88684e-65	yes	down		maker-Fvb6-3-augustus-gene-162.42	PREDICTED: chaperone protein dnaJ 8, chloroplastic isoform X2 [Fragaria vesca subsp. vesca]	1.66721	6.36311e-44	1.60124e-42	yes	up
maker-Fvb1-1-augustus-gene-168.25	PREDICTED: transcription factor bHLH93-like [Fragaria vesca subsp. vesca]	-1.18177	1.64888e-06	6.60815e-06	yes	down		maker-Fvb2-2-augustus-gene-17.53	PREDICTED: trihelix transcription factor GT-2-like [Fragaria vesca subsp. vesca]	2.11905	1.89833e-20	2.03355e-19	yes	up
maker-Fvb2-4-augustus-gene-47.27	PREDICTED: plastid division protein PDV2-like [Fragaria vesca subsp. vesca]	-2.4726	5.61768e-125	6.40262e-123	yes	down		snap_masked-Fvb6-4-processed-gene-298.31	PREDICTED: pyruvate kinase isozyme A, chloroplastic [Fragaria vesca subsp. vesca]	1.10362	1.37979e-43	3.44576e-42	yes	up
maker-Fvb2-3-augustus-gene-99.34	PREDICTED: uncharacterized protein LOC101311719 [Fragaria vesca subsp. vesca]	-1.61622	3.44087e-15	2.78051e-14	yes	down		augustus_masked-Fvb6-1-processed-gene-256.13	PREDICTED: uncharacterized protein LOC101312271 [Fragaria vesca subsp. vesca]	2.56444	0.00866284	0.0197932	yes	up
snap_masked-Fvb5-1-processed-gene-275.31	PREDICTED: (-)-isopiperitenol/(-)-carveol dehydrogenase, mitochondrial-like [Fragaria vesca subsp. vesca]	-1.58486	3.41906e-12	2.2619e-11	yes	down		MSTRG.19616	PREDICTED: stem-specific protein TSJT1-like [Fragaria vesca subsp. vesca]	2.23148	2.6716e-43	6.61614e-42	yes	up
maker-Fvb1-1-snap-gene-152.31	PREDICTED: 7-deoxyloganetin glucosyltransferase-like [Fragaria vesca subsp. vesca]	-2.611	1.98337e-30	3.27157e-29	yes	down		MSTRG.48124	zinc finger CCCH domain-containing protein 62 [Prunus persica]	1.22693	0.00166373	0.00437859	yes	up
augustus_masked-Fvb2-4-processed-gene-209.3	PREDICTED: G-type lectin S-receptor-like serine/threonine-protein kinase B120 isoform X2 [Fragaria vesca subsp. vesca]	-1.04975	2.15908e-29	3.42622e-28	yes	down		maker-Fvb1-1-snap-gene-118.44	PREDICTED: probable polygalacturonase [Fragaria vesca subsp. vesca]	1.08133	4.61379e-17	4.16773e-16	yes	up
augustus_masked-Fvb1-2-processed-gene-14.8	PREDICTED: probable glutamate carboxypeptidase 2 [Fragaria vesca subsp. vesca]	-1.16408	1.17682e-17	1.09454e-16	yes	down		augustus_masked-Fvb2-2-processed-gene-222.6	PREDICTED: chaperone protein dnaJ 11, chloroplastic-like [Fragaria vesca subsp. vesca]	7.52599	1.76709e-09	9.47146e-09	yes	up
maker-Fvb5-1-snap-gene-59.61	hypothetical protein PRdownE_5G125600 [Prunus persica]	-3.3303	2.24797e-11	1.40033e-10	yes	down		augustus_masked-Fvb4-4-processed-gene-12.18	PREDICTED: uncharacterized protein LOC105351248 [Fragaria vesca subsp. vesca]	4.46976	1.4267e-07	6.40075e-07	yes	up
snap_masked-Fvb7-4-processed-gene-100.19	PREDICTED: DEAD-box ATP-dependent RNA helicase 31-like [Fragaria vesca subsp. vesca]	-1.5367	6.60985e-60	2.51114e-58	yes	down		maker-Fvb6-1-augustus-gene-310.45	PREDICTED: protein LURP-one-related 5-like [Fragaria vesca subsp. vesca]	1.07878	0.00157648	0.0041665	yes	up
maker-Fvb4-4-augustus-gene-67.58	PREDICTED: uncharacterized protein LOC101297695 [Fragaria vesca subsp. vesca]	-1.01854	5.04914e-31	8.51485e-30	yes	down		augustus_masked-Fvb1-3-processed-gene-17.11	PREDICTED: uncharacterized protein At1g15400-like [Fragaria vesca subsp. vesca]	1.48515	4.16134e-10	2.35216e-09	yes	up
augustus_masked-Fvb5-3-processed-gene-69.5	PREDICTED: protein NRT1/ PTR FAMILY 5.10-like [Fragaria vesca subsp. vesca]	-1.75499	1.23849e-31	2.13277e-30	yes	down		maker-Fvb3-1-augustus-gene-299.41	PREDICTED: F-box protein SKIP27 [Fragaria vesca subsp. vesca]	4.22419	2.40783e-12	1.61369e-11	yes	up
maker-Fvb7-2-augustus-gene-166.28	PREDICTED: 4-hydroxy-tetrahydrodipicolinate synthase, chloroplastic-like isoform X1 [Fragaria vesca subsp. vesca]	-1.00882	1.26372e-42	3.07087e-41	yes	down		snap_masked-Fvb4-3-processed-gene-135.24	PREDICTED: bifunctional epoxide hydrolase 2-like isoform X2 [Fragaria vesca subsp. vesca]	1.17547	2.34122e-10	1.3488e-09	yes	up
MSTRG.4180	PREDICTED: chitotriosidase-1-like [Fragaria vesca subsp. vesca]	-1.70992	2.15083e-44	5.47083e-43	yes	down		maker-Fvb2-4-snap-gene-127.29	PREDICTED: phosphatidylinositol transfer protein 2-like isoform X1 [Fragaria vesca subsp. vesca]	2.76738	5.08625e-20	5.32392e-19	yes	up
maker-Fvb2-1-augustus-gene-98.27	PREDICTED: uncharacterized protein ycf39 [Fragaria vesca subsp. vesca]	-1.02708	1.7641e-35	3.41734e-34	yes	down		maker-Fvb3-2-augustus-gene-278.49	PREDICTED: putative pentatricopeptide repeat-containing protein At1g12700, mitochondrial [Fragaria vesca subsp. vesca]	1.23695	0.00454547	0.0110054	yes	up
MSTRG.11432	PREDICTED: monosaccharide-sensing protein 2 [Fragaria vesca subsp. vesca]	-1.09912	1.56842e-19	1.60661e-18	yes	down		maker-Fvb4-3-augustus-gene-149.30	PREDICTED: peptidyl-prolyl cis-trans isomerase FKBP62-like [Fragaria vesca subsp. vesca]	1.96332	2.18544e-49	6.359e-48	yes	up
maker-Fvb2-2-augustus-gene-26.48	PREDICTED: uncharacterized protein At2g34160-like isoform X2 [Fragaria vesca subsp. vesca]	-1.15714	8.47751e-12	5.45684e-11	yes	down		augustus_masked-Fvb3-2-processed-gene-176.6	PREDICTED: uncharacterized protein LOC105350703 [Fragaria vesca subsp. vesca]	3.17621	1.71768e-35	3.33022e-34	yes	up
augustus_masked-Fvb3-2-processed-gene-121.1	PREDICTED: NAC domain-containing protein 18-like [Fragaria vesca subsp. vesca]	-1.32676	5.13533e-24	6.45785e-23	yes	down		maker-Fvb7-4-augustus-gene-63.29	PREDICTED: protein FIZZY-RELATED 3 [Fragaria vesca subsp. vesca]	1.89359	0.00637565	0.0149907	yes	up
augustus_masked-Fvb3-3-processed-gene-241.2	PREDICTED: transcription factor PCL1 [Fragaria vesca subsp. vesca]	-4.62664	6.00628e-40	1.34347e-38	yes	down		snap_masked-Fvb5-3-processed-gene-106.22	PREDICTED: uncharacterized protein LOC101300149 isoform X1 [Fragaria vesca subsp. vesca]	1.21169	7.48132e-80	4.17791e-78	yes	up
maker-Fvb7-4-augustus-gene-16.50	PREDICTED: ABC transporter C family member 10-like [Fragaria vesca subsp. vesca]	-1.28201	2.52338e-42	6.06932e-41	yes	down		augustus_masked-Fvb3-2-processed-gene-191.9	PREDICTED: probable carboxylesterase 18 [Fragaria vesca subsp. vesca]	1.25277	4.73281e-11	2.88129e-10	yes	up
maker-Fvb7-1-augustus-gene-305.38	PREDICTED: protein TRANSPARENT TESTA 12-like [Fragaria vesca subsp. vesca]	-1.25018	1.82486e-17	1.68197e-16	yes	down		snap_masked-Fvb3-4-processed-gene-0.18	PREDICTED: SNF1-related protein kinase regulatory subunit gamma-1-like isoform X3 [Fragaria vesca subsp. vesca]	1.53698	7.68655e-74	3.79077e-72	yes	up
maker-Fvb5-3-augustus-gene-176.37	PREDICTED: kinase-interacting family protein isoform X1 [Fragaria vesca subsp. vesca]	-3.86135	5.11888e-17	4.60544e-16	yes	down		maker-Fvb1-1-augustus-gene-213.29	PREDICTED: MORC family CW-type zinc finger protein 4-like [Fragaria vesca subsp. vesca]	1.48925	5.32561e-26	7.30869e-25	yes	up
maker-Fvb7-3-augustus-gene-2.67	PREDICTED: short-chain dehydrogenase TIC 32, chloroplastic-like isoform X2 [Fragaria vesca subsp. vesca]	-2.6736	1.45168e-169	2.90261e-167	yes	down		MSTRG.33115	PREDICTED: protein indeterminate-domain 4, chloroplastic-like [Fragaria vesca subsp. vesca]	1.04579	3.62239e-28	5.44666e-27	yes	up
augustus_masked-Fvb6-2-processed-gene-223.13	PREDICTED: uncharacterized protein LOC101292439 [Fragaria vesca subsp. vesca]	-1.05421	9.32681e-08	4.27574e-07	yes	down		snap_masked-Fvb1-2-processed-gene-123.20	PREDICTED: probable starch synthase 4, chloroplastic/amyloplastic [Fragaria vesca subsp. vesca]	1.54497	2.85047e-31	4.84343e-30	yes	up
maker-Fvb2-3-snap-gene-78.65	PREDICTED: adenine phosphoribosyltransferase 5-like [Fragaria vesca subsp. vesca]	-1.83599	3.27964e-48	9.27292e-47	yes	down		maker-Fvb3-2-augustus-gene-63.39	PREDICTED: uncharacterized protein LOC101307378 [Fragaria vesca subsp. vesca]	1.44207	7.16814e-40	1.59885e-38	yes	up
maker-Fvb7-4-augustus-gene-34.51	PREDICTED: uncharacterized protein LOC101300762 [Fragaria vesca subsp. vesca]	-1.7585	1.94643e-48	5.53571e-47	yes	down		maker-Fvb1-1-snap-gene-265.73	PREDICTED: uncharacterized protein LOC101298453 [Fragaria vesca subsp. vesca]	1.70726	9.51644e-15	7.49195e-14	yes	up
maker-Fvb3-1-snap-gene-9.26	PREDICTED: uncharacterized protein LOC101295497 [Fragaria vesca subsp. vesca]	-3.93305	7.49855e-271	4.28377e-268	yes	down		maker-Fvb4-2-augustus-gene-196.16	PREDICTED: 2-alkenal reductase (NADP(+)-dependent)-like [Fragaria vesca subsp. vesca]	1.26112	2.96067e-23	3.60724e-22	yes	up
maker-Fvb1-2-augustus-gene-136.40	phospho-2-dehydro-3-deoxyheptonate aldolase [Fragaria x ananassa]	-2.45293	2.46108e-239	1.04313e-236	yes	down		maker-Fvb2-4-augustus-gene-37.18	PREDICTED: protein CHROMATIN REMODELING 25 [Fragaria vesca subsp. vesca]	2.1972	0.00701933	0.0163727	yes	up
MSTRG.6114	PREDICTED: uncharacterized protein LOC101309487 isoform X1 [Fragaria vesca subsp. vesca]	-1.40872	1.13408e-28	1.7437e-27	yes	down		maker-Fvb5-1-augustus-gene-52.57	PREDICTED: alpha-mannosidase-like [Fragaria vesca subsp. vesca]	2.47799	4.7783e-59	1.78364e-57	yes	up
maker-Fvb7-4-augustus-gene-23.55	PREDICTED: transmembrane ascorbate ferrireductase 1 [Fragaria vesca subsp. vesca]	-1.04294	1.88026e-33	3.42453e-32	yes	down		snap_masked-Fvb6-3-processed-gene-246.12	PREDICTED: ethylene-responsive transcription factor ERF027-like [Fragaria vesca subsp. vesca]	3.18499	0.0231213	0.0477524	yes	up
maker-Fvb6-2-augustus-gene-267.52	PREDICTED: ferrochelatase-2, chloroplastic [Fragaria vesca subsp. vesca]	-1.06227	2.32096e-46	6.25651e-45	yes	down		maker-Fvb4-3-snap-gene-208.48	PREDICTED: nucleophosmin-like, partial [Fragaria vesca subsp. vesca]	1.1998	0.0220188	0.045729	yes	up
maker-Fvb7-4-augustus-gene-187.44	PREDICTED: cysteine proteinase inhibitor A [Fragaria vesca subsp. vesca]	-1.4502	5.34258e-87	3.4411e-85	yes	down		MSTRG.19721	PREDICTED: leucine-rich repeat extensin-like protein 4 isoform X1 [Pyrus x bretschneideri]	2.08259	1.13641e-14	8.8849e-14	yes	up
maker-Fvb3-3-snap-gene-80.54	PREDICTED: ubiquitin carboxyl-terminal hydrolase 15 isoform X1 [Fragaria vesca subsp. vesca]	-1.48203	1.8815e-96	1.41383e-94	yes	down		maker-Fvb4-4-snap-gene-192.14	PREDICTED: uncharacterized protein LOC101299924 [Fragaria vesca subsp. vesca]	1.02241	4.19923e-13	2.96597e-12	yes	up
maker-Fvb5-4-augustus-gene-111.22	PREDICTED: ferredoxin [Fragaria vesca subsp. vesca]	-1.09485	2.95839e-28	4.46506e-27	yes	down		snap_masked-Fvb3-3-processed-gene-159.5	probable serine/threonine-protein kinase PBL12 [Rosa chinensis]	1.35642	3.75718e-70	1.75773e-68	yes	up
MSTRG.52853	PREDICTED: ethylene-responsive transcription factor ERF054-like [Fragaria vesca subsp. vesca]	-2.66877	5.75077e-69	2.6302e-67	yes	down		maker-Fvb7-4-snap-gene-180.57	PREDICTED: NADPH-dependent diflavin oxidoreductase 1 [Fragaria vesca subsp. vesca]	1.02729	4.29158e-18	4.07434e-17	yes	up
maker-Fvb1-1-augustus-gene-211.33	PREDICTED: uncharacterized protein LOC101294881 [Fragaria vesca subsp. vesca]	-1.25455	8.2957e-27	1.17821e-25	yes	down		snap_masked-Fvb4-3-processed-gene-231.11	PREDICTED: WUSCHEL-related homeobox 3-like [Fragaria vesca subsp. vesca]	1.59615	0.0017974	0.00470053	yes	up
augustus_masked-Fvb7-3-processed-gene-59.8	PREDICTED: GDP-Man:Man(3)GlcNAc(2)-PP-Dol alpha-1,2-mannosyltransferase [Fragaria vesca subsp. vesca]	-1.32635	8.6664e-74	4.27171e-72	yes	down		maker-Fvb5-3-snap-gene-253.50	PREDICTED: putative glucose-6-phosphate 1-epimerase [Fragaria vesca subsp. vesca]	1.08469	1.0189e-21	1.1594e-20	yes	up
maker-Fvb6-4-augustus-gene-100.44	PREDICTED: actin-depolymerizing factor 3-like [Fragaria vesca subsp. vesca]	-1.02013	1.13314e-45	3.0009e-44	yes	down		snap_masked-Fvb3-1-processed-gene-249.20	PREDICTED: pentatricopeptide repeat-containing protein At4g20090 [Fragaria vesca subsp. vesca]	1.96282	1.80998e-74	9.03773e-73	yes	up
snap_masked-Fvb2-1-processed-gene-109.29	PREDICTED: probable sodium/metabolite cotransporter BASS3, chloroplastic [Fragaria vesca subsp. vesca]	-1.51023	2.5392e-91	1.76261e-89	yes	down		maker-Fvb5-1-augustus-gene-27.44	PREDICTED: RING-H2 finger protein ATL22-like [Fragaria vesca subsp. vesca]	1.22527	0.000321915	0.000956558	yes	up
maker-Fvb7-2-augustus-gene-72.29	PREDICTED: uncharacterized protein LOC101294899 isoform X1 [Fragaria vesca subsp. vesca]	-1.118	0.00692312	0.016166	yes	down		augustus_masked-Fvb7-2-processed-gene-107.17	PREDICTED: peroxisome biogenesis protein 16 [Fragaria vesca subsp. vesca]	1.00157	6.32604e-13	4.40924e-12	yes	up
augustus_masked-Fvb5-3-processed-gene-187.4	PREDICTED: non-specific lipid-transfer protein 2 [Fragaria vesca subsp. vesca]	-1.48667	6.54651e-12	4.24508e-11	yes	down		maker-Fvb4-4-snap-gene-157.65	PREDICTED: uncharacterized protein LOC101313740 [Fragaria vesca subsp. vesca]	1.24267	1.89397e-41	4.43822e-40	yes	up
MSTRG.229	PREDICTED: psbQ-like protein 3, chloroplastic isoform X4 [Fragaria vesca subsp. vesca]	-1.18284	1.57957e-06	6.34643e-06	yes	down		maker-Fvb4-2-augustus-gene-87.35	PREDICTED: solute carrier family 25 member 44-like [Fragaria vesca subsp. vesca]	1.082	0.0140229	0.0305575	yes	up
augustus_masked-Fvb4-4-processed-gene-6.12	PREDICTED: uncharacterized protein LOC101301578 [Fragaria vesca subsp. vesca]	-1.17428	0.00353998	0.00876193	yes	down		MSTRG.28304	--	3.5305	4.22378e-118	4.38967e-116	yes	up
maker-Fvb1-4-augustus-gene-164.35	PREDICTED: uncharacterized protein LOC101298068 [Fragaria vesca subsp. vesca]	-2.33397	8.18753e-34	1.50341e-32	yes	down		maker-Fvb3-3-snap-gene-106.44	PREDICTED: peptidyl-prolyl cis-trans isomerase CYP37, chloroplastic isoform X1 [Fragaria vesca subsp. vesca]	1.0898	5.67368e-35	1.07908e-33	yes	up
maker-Fvb3-1-augustus-gene-281.29	PREDICTED: acetolactate synthase small subunit 1, chloroplastic [Fragaria vesca subsp. vesca]	-1.17013	2.05593e-60	7.89877e-59	yes	down		snap_masked-Fvb6-1-processed-gene-12.21	PREDICTED: calcium-binding protein CML38 [Fragaria vesca subsp. vesca]	2.09622	0.0180319	0.0383256	yes	up
maker-Fvb5-1-augustus-gene-110.45	PREDICTED: uncharacterized protein LOC101303523 [Fragaria vesca subsp. vesca]	-1.04806	1.0238e-26	1.44535e-25	yes	down		maker-Fvb2-4-augustus-gene-14.48	PREDICTED: inactive serine/threonine-protein kinase At1g67470-like [Fragaria vesca subsp. vesca]	1.20037	1.25943e-39	2.78254e-38	yes	up
maker-Fvb5-4-augustus-gene-49.33	PREDICTED: pentatricopeptide repeat-containing protein At5g61800 [Fragaria vesca subsp. vesca]	-1.17129	3.0319e-09	1.59596e-08	yes	down		MSTRG.5909	LOW QUALITY PROTEIN: extensin-2-like [Rosa chinensis]	1.50973	1.06053e-08	5.30821e-08	yes	up
maker-Fvb1-2-augustus-gene-123.48	2-alkenal reductase (NADP(+)-dependent)-like [Rosa chinensis]	-1.81981	4.24257e-36	8.3809e-35	yes	down		maker-Fvb4-3-augustus-gene-168.36	PREDICTED: leucine-rich repeat receptor-like serine/threonine-protein kinase At2g14510 [Fragaria vesca subsp. vesca]	1.09004	6.32375e-05	0.000209205	yes	up
maker-Fvb5-3-augustus-gene-158.19	PREDICTED: uncharacterized protein LOC101301109 [Fragaria vesca subsp. vesca]	-2.29695	2.90245e-103	2.48331e-101	yes	down		augustus_masked-Fvb4-1-processed-gene-63.6	PREDICTED: probable mitochondrial chaperone BCS1-B [Fragaria vesca subsp. vesca]	1.84661	0.00320888	0.00801574	yes	up
maker-Fvb4-4-augustus-gene-100.42	PREDICTED: extensin-like [Fragaria vesca subsp. vesca]	-1.01627	3.87002e-07	1.6665e-06	yes	down		MSTRG.7890	PREDICTED: cytochrome c biogenesis protein CCS1, chloroplastic [Fragaria vesca subsp. vesca]	1.96032	4.12665e-55	1.39541e-53	yes	up
maker-Fvb7-4-augustus-gene-51.25	PREDICTED: transcription factor MYB86-like [Fragaria vesca subsp. vesca]	-1.39156	0.0121533	0.0268756	yes	down		maker-Fvb4-3-augustus-gene-60.40	PREDICTED: extensin-2-like, partial [Fragaria vesca subsp. vesca]	1.27851	5.81431e-07	2.454e-06	yes	up
MSTRG.18883	PREDICTED: GDP-L-galactose phosphorylase 1-like isoform X1 [Fragaria vesca subsp. vesca]	-1.86095	1.78444e-10	1.03838e-09	yes	down		MSTRG.13114	hypothetical protein PRUPE_1G159700 [Prunus persica]	1.90029	4.37424e-06	1.67308e-05	yes	up
maker-Fvb6-3-augustus-gene-105.39	PREDICTED: uncharacterized protein LOC101291939 [Fragaria vesca subsp. vesca]	-2.48406	1.4134e-35	2.74491e-34	yes	down		maker-Fvb7-2-augustus-gene-189.43	PREDICTED: probable inactive 2-oxoglutarate-dependent dioxygenase AOP2 [Fragaria vesca subsp. vesca]	1.7077	0.000604111	0.00171625	yes	up
MSTRG.54153	PREDICTED: dnaJ homolog subfamily B member 3 [Fragaria vesca subsp. vesca]	-1.72392	1.35103e-135	1.77518e-133	yes	down		MSTRG.5571	hypothetical protein RchiOBHm_Chr2g0123801 [Rosa chinensis]	1.65415	2.19347e-10	1.26773e-09	yes	up
maker-Fvb1-4-snap-gene-3.79	VIN3-like protein 1 isoform X1 [Rosa chinensis]	-1.28929	4.99576e-13	3.51051e-12	yes	down		augustus_masked-Fvb5-4-processed-gene-43.4	PREDICTED: receptor-like protein 12 [Fragaria vesca subsp. vesca]	1.41878	0.000122828	0.00038897	yes	up
maker-Fvb7-4-snap-gene-78.59	PREDICTED: glutathione S-transferase DHAR2-like [Fragaria vesca subsp. vesca]	-1.22143	1.74985e-10	1.01915e-09	yes	down		maker-Fvb7-2-augustus-gene-192.35	WRKY transcription factor 51 [Fragaria vesca]	1.27305	3.51316e-30	5.74855e-29	yes	up
maker-Fvb6-3-augustus-gene-394.51	PREDICTED: serine/threonine-protein kinase At3g07070-like [Fragaria vesca subsp. vesca]	-1.15875	4.40115e-06	1.68225e-05	yes	down		snap_masked-Fvb7-3-processed-gene-101.17	PREDICTED: uncharacterized protein LOC101307620 [Fragaria vesca subsp. vesca]	1.07406	5.50755e-06	2.08111e-05	yes	up
snap_masked-Fvb4-1-processed-gene-155.21	PREDICTED: transcription factor bHLH30 [Fragaria vesca subsp. vesca]	-1.01816	2.10249e-08	1.0229e-07	yes	down		maker-Fvb3-1-augustus-gene-250.30	allantoate deiminase 2-like isoform X2 [Rosa chinensis]	1.13226	1.88998e-16	1.64365e-15	yes	up
maker-Fvb7-3-augustus-gene-24.41	PREDICTED: starch synthase 1, chloroplastic/amyloplastic [Fragaria vesca subsp. vesca]	-1.60768	1.26839e-142	1.80033e-140	yes	down		maker-Fvb5-3-augustus-gene-156.37	PREDICTED: dynamin-related protein 1E-like [Fragaria vesca subsp. vesca]	1.48173	1.45011e-07	6.50041e-07	yes	up
maker-Fvb1-2-snap-gene-32.89	PREDICTED: probable polyol transporter 6 [Fragaria vesca subsp. vesca]	-3.0201	0.000721893	0.00202571	yes	down		augustus_masked-Fvb7-1-processed-gene-227.0	PREDICTED: CBL-interacting serine/threonine-protein kinase 9 [Fragaria vesca subsp. vesca]	1.63578	2.73478e-34	5.09076e-33	yes	up
augustus_masked-Fvb5-1-processed-gene-29.10	PREDICTED: uncharacterized protein LOC105351441 [Fragaria vesca subsp. vesca]	-1.26777	3.52239e-21	3.90944e-20	yes	down		MSTRG.52130	PREDICTED: wall-associated receptor kinase-like 9 [Fragaria vesca subsp. vesca]	1.4737	3.4569e-05	0.000118224	yes	up
snap_masked-Fvb3-4-processed-gene-109.14	PREDICTED: arogenate dehydratase/prephenate dehydratase 6, chloroplastic [Fragaria vesca subsp. vesca]	-1.15276	0.00129622	0.00347899	yes	down		MSTRG.56448	PREDICTED: uncharacterized protein LOC101297459 [Fragaria vesca subsp. vesca]	3.25989	1.21955e-12	8.34472e-12	yes	up
maker-Fvb1-1-augustus-gene-210.39	PREDICTED: pheophytinase, chloroplastic [Fragaria vesca subsp. vesca]	-1.83652	2.9913e-160	5.33194e-158	yes	down		maker-Fvb4-4-snap-gene-251.14	PREDICTED: F-box protein At5g07610-like [Fragaria vesca subsp. vesca]	1.43849	9.6024e-07	3.95411e-06	yes	up
maker-Fvb1-2-snap-gene-87.46	PREDICTED: cytochrome P450 90B1 [Fragaria vesca subsp. vesca]	-1.55484	2.6844e-14	2.05203e-13	yes	down		augustus_masked-Fvb5-1-processed-gene-19.5	uncharacterized protein LOC112177456 [Rosa chinensis]	1.65871	6.74196e-08	3.13229e-07	yes	up
maker-Fvb6-2-augustus-gene-237.38	PREDICTED: sucrose nonfermenting 4-like protein [Fragaria vesca subsp. vesca]	-1.3653	3.65215e-19	3.67155e-18	yes	down		augustus_masked-Fvb6-3-processed-gene-49.13	PREDICTED: vicilin-like antimicrobial peptides 2-2 [Fragaria vesca subsp. vesca]	1.17301	0.000103045	0.00033005	yes	up
maker-Fvb4-1-augustus-gene-12.34	PREDICTED: uncharacterized protein LOC101303794 [Fragaria vesca subsp. vesca]	-1.00838	2.67698e-57	9.57674e-56	yes	down		maker-Fvb4-2-augustus-gene-40.49	PREDICTED: protein PHYLLO, chloroplastic isoform X1 [Fragaria vesca subsp. vesca]	1.03081	1.67076e-35	3.23993e-34	yes	up
maker-Fvb7-4-augustus-gene-106.52	PREDICTED: desiccation protectant protein Lea14 homolog [Fragaria vesca subsp. vesca]	-2.51312	3.18822e-272	1.89187e-269	yes	down		maker-Fvb2-1-augustus-gene-172.26	AUX1 [Fragaria x ananassa]	1.14787	1.42153e-17	1.31655e-16	yes	up
augustus_masked-Fvb6-3-processed-gene-292.5	PREDICTED: peroxiredoxin-2E-2, chloroplastic [Fragaria vesca subsp. vesca]	-1.83943	1.00657e-09	5.51566e-09	yes	down		maker-Fvb6-2-augustus-gene-296.64	PREDICTED: transcription factor WER-like [Fragaria vesca subsp. vesca]	3.87624	0.0113859	0.0253493	yes	up
augustus_masked-Fvb7-3-processed-gene-203.2	putative kelch-type beta propeller [Rosa chinensis]	-1.46706	9.47983e-05	0.000305646	yes	down		maker-Fvb6-1-augustus-gene-342.49	PREDICTED: uncharacterized protein LOC101300067 [Fragaria vesca subsp. vesca]	1.05873	0.00543156	0.0129551	yes	up
maker-Fvb6-2-snap-gene-205.50	PREDICTED: lactosylceramide 4-alpha-galactosyltransferase-like [Fragaria vesca subsp. vesca]	-2.56609	1.10656e-58	4.0825e-57	yes	down		maker-Fvb4-3-augustus-gene-15.52	PREDICTED: uncharacterized protein LOC101307881 [Fragaria vesca subsp. vesca]	2.58059	8.57848e-19	8.46855e-18	yes	up
augustus_masked-Fvb5-4-processed-gene-83.3	PREDICTED: glutamate decarboxylase 4-like [Fragaria vesca subsp. vesca]	-1.29956	6.80672e-102	5.65031e-100	yes	down		augustus_masked-Fvb5-1-processed-gene-185.12	PREDICTED: putative calcium-binding protein CML19 [Fragaria vesca subsp. vesca]	2.06624	0.000672201	0.00189344	yes	up
snap_masked-Fvb3-3-processed-gene-146.8	PREDICTED: transcription factor LHW [Fragaria vesca subsp. vesca]	-1.36402	6.02624e-46	1.60891e-44	yes	down		maker-Fvb7-4-snap-gene-178.31	PREDICTED: ATP-citrate synthase alpha chain protein 1 [Fragaria vesca subsp. vesca]	2.32384	0.00882197	0.0201267	yes	up
augustus_masked-Fvb2-1-processed-gene-171.8	PREDICTED: pentatricopeptide repeat-containing protein At4g08210 [Fragaria vesca subsp. vesca]	-1.88463	9.31734e-43	2.27253e-41	yes	down		maker-Fvb2-2-augustus-gene-196.36	rac-like GTP-binding protein ARAC7 [Rosa chinensis]	1.33364	0.000217685	0.000664226	yes	up
snap_masked-Fvb7-3-processed-gene-1.40	PREDICTED: scarecrow-like protein 8 [Fragaria vesca subsp. vesca]	-2.0692	0.00852632	0.0195123	yes	down		maker-Fvb1-1-snap-gene-219.49	--	1.43152	2.20858e-06	8.74457e-06	yes	up
augustus_masked-Fvb2-4-processed-gene-40.5	PREDICTED: probable carboxylesterase 5 [Fragaria vesca subsp. vesca]	-1.33521	3.37126e-21	3.74396e-20	yes	down		augustus_masked-Fvb4-3-processed-gene-88.9	PREDICTED: uncharacterized protein LOC101290763 [Fragaria vesca subsp. vesca]	1.91391	1.95603e-52	6.16544e-51	yes	up
maker-Fvb4-3-augustus-gene-180.34	PREDICTED: peptide methionine sulfoxide reductase B3, chloroplastic-like [Fragaria vesca subsp. vesca]	-1.1796	2.85261e-20	3.02473e-19	yes	down		maker-Fvb5-2-augustus-gene-109.48	PREDICTED: histidine triad nucleotide-binding protein 3 [Fragaria vesca subsp. vesca]	1.16092	3.0377e-05	0.000104748	yes	up
maker-Fvb2-1-augustus-gene-126.14	PREDICTED: uncharacterized protein At4g13200, chloroplastic [Fragaria vesca subsp. vesca]	-1.6669	3.41127e-26	4.72621e-25	yes	down		maker-Fvb6-4-augustus-gene-105.43	PREDICTED: protein REVEILLE 8 [Fragaria vesca subsp. vesca]	2.16142	2.26522e-156	3.83695e-154	yes	up
maker-Fvb7-2-augustus-gene-115.58	PREDICTED: beta-amylase 2, chloroplastic [Fragaria vesca subsp. vesca]	-1.16031	2.26081e-16	1.9593e-15	yes	down		snap_masked-Fvb1-3-processed-gene-188.22	PREDICTED: receptor-like serine/threonine-protein kinase At4g25390 [Fragaria vesca subsp. vesca]	3.56497	6.16385e-48	1.73213e-46	yes	up
maker-Fvb5-1-augustus-gene-149.36	PREDICTED: RNA-binding protein NOB1 [Fragaria vesca subsp. vesca]	-1.01034	0.000537104	0.0015391	yes	down		MSTRG.2046	PREDICTED: mitochondrial-processing peptidase subunit alpha-like [Fragaria vesca subsp. vesca]	1.17793	2.93291e-06	1.14668e-05	yes	up
maker-Fvb4-4-augustus-gene-82.53	PREDICTED: transcription factor HY5-like isoform X2 [Fragaria vesca subsp. vesca]	-2.64111	4.60792e-140	6.3828e-138	yes	down		maker-Fvb1-2-augustus-gene-72.31	PREDICTED: lysine histidine transporter-like 8 [Fragaria vesca subsp. vesca]	2.52113	5.01743e-114	4.94093e-112	yes	up
maker-Fvb6-1-augustus-gene-288.39	PREDICTED: carboxy-terminal domain RNA polymerase II polypeptide A small phosphatase 1-like [Fragaria vesca subsp. vesca]	-1.13283	0.00663933	0.015559	yes	down		maker-Fvb2-2-snap-gene-208.50	PREDICTED: uncharacterized protein LOC101303570 [Fragaria vesca subsp. vesca]	1.33176	3.89304e-21	4.31197e-20	yes	up
maker-Fvb7-4-augustus-gene-114.35	PREDICTED: uncharacterized protein LOC101303550 [Fragaria vesca subsp. vesca]	-1.03218	6.52102e-05	0.00021536	yes	down		MSTRG.39052	PREDICTED: RING-H2 finger protein ATL22-like isoform X1 [Fragaria vesca subsp. vesca]	1.13652	2.63845e-08	1.27261e-07	yes	up
maker-Fvb7-1-augustus-gene-305.34	PREDICTED: putative transporter arsB [Fragaria vesca subsp. vesca]	-1.62937	1.22961e-15	1.02302e-14	yes	down		maker-Fvb5-2-augustus-gene-195.15	PREDICTED: pre-rRNA-processing protein TSR2 homolog [Fragaria vesca subsp. vesca]	1.58338	1.28235e-24	1.65491e-23	yes	up
maker-Fvb7-4-snap-gene-137.48	PREDICTED: uncharacterized protein LOC101305980 [Fragaria vesca subsp. vesca]	-1.14262	1.77927e-10	1.03563e-09	yes	down		maker-Fvb6-2-snap-gene-46.45	PREDICTED: pyridoxal 5&apos;-phosphate synthase-like subunit PDX1.2 [Fragaria vesca subsp. vesca]	1.22538	0.00105997	0.00288684	yes	up
maker-Fvb5-2-augustus-gene-166.44	PREDICTED: monosaccharide-sensing protein 2 [Fragaria vesca subsp. vesca]	-1.1516	3.25194e-62	1.30384e-60	yes	down		maker-Fvb3-1-augustus-gene-210.34	basic leucine zipper 34-like [Rosa chinensis]	3.5643	3.91757e-15	3.15518e-14	yes	up
maker-Fvb7-2-augustus-gene-210.48	PREDICTED: ATPase GET3 [Fragaria vesca subsp. vesca]	-1.27491	4.1888e-18	3.97841e-17	yes	down		maker-Fvb5-1-snap-gene-208.48	PREDICTED: uncharacterized protein LOC101306243 isoform X2 [Fragaria vesca subsp. vesca]	2.16019	4.07992e-05	0.000138399	yes	up
maker-Fvb6-4-augustus-gene-154.27	PREDICTED: N(6)-adenine-specific DNA methyltransferase 2 [Fragaria vesca subsp. vesca]	-1.03525	1.28862e-10	7.58783e-10	yes	down		maker-Fvb3-2-augustus-gene-188.30	PREDICTED: zinc finger CCCH domain-containing protein 46-like isoform X2 [Fragaria vesca subsp. vesca]	1.31067	8.72681e-15	6.88149e-14	yes	up
maker-Fvb1-1-augustus-gene-70.13	PREDICTED: psbQ-like protein 3, chloroplastic isoform X4 [Fragaria vesca subsp. vesca]	-1.18284	1.57957e-06	6.34643e-06	yes	down		maker-Fvb1-4-augustus-gene-161.30	PREDICTED: uncharacterized protein LOC101314230 [Fragaria vesca subsp. vesca]	2.06268	1.36431e-92	9.71986e-91	yes	up
maker-Fvb1-4-augustus-gene-4.54	PREDICTED: aldehyde dehydrogenase family 2 member C4-like [Fragaria vesca subsp. vesca]	-1.07142	2.3151e-09	1.2309e-08	yes	down		snap_masked-Fvb6-2-processed-gene-283.28	PREDICTED: uncharacterized protein LOC101296411 [Fragaria vesca subsp. vesca]	2.2141	1.8237e-11	1.14285e-10	yes	up
maker-Fvb5-2-augustus-gene-37.55	PREDICTED: ferric reduction oxidase 8, mitochondrial [Fragaria vesca subsp. vesca]	-1.14557	3.99933e-32	6.98391e-31	yes	down		MSTRG.6259	PREDICTED: putative protein TPRXL isoform X1 [Prunus mume]	1.3652	1.54688e-25	2.08006e-24	yes	up
augustus_masked-Fvb4-3-processed-gene-34.10	PREDICTED: uncharacterized protein LOC105351146 [Fragaria vesca subsp. vesca]	-2.43268	7.81948e-12	5.04351e-11	yes	down		maker-Fvb6-3-snap-gene-44.80	PREDICTED: zinc finger CCCH domain-containing protein 62-like [Pyrus x bretschneideri]	2.7486	0.012021	0.0266107	yes	up
maker-Fvb5-4-augustus-gene-227.27	PREDICTED: phospho-2-dehydro-3-deoxyheptonate aldolase 2, chloroplastic-like [Fragaria vesca subsp. vesca]	-1.60158	2.14777e-49	6.25335e-48	yes	down		maker-Fvb1-1-augustus-gene-181.37	PREDICTED: uncharacterized protein LOC101301813 [Fragaria vesca subsp. vesca]	1.18992	2.8146e-11	1.74034e-10	yes	up
maker-Fvb3-3-augustus-gene-113.38	PREDICTED: uncharacterized protein LOC101314354 [Fragaria vesca subsp. vesca]	-1.04954	0.00118795	0.00320898	yes	down		maker-Fvb3-1-augustus-gene-59.33	PREDICTED: uncharacterized protein LOC105350560 [Fragaria vesca subsp. vesca]	1.5633	5.03873e-09	2.60142e-08	yes	up
maker-Fvb1-3-augustus-gene-5.58	PREDICTED: QWRF motif-containing protein 8-like [Fragaria vesca subsp. vesca]	-1.24416	0.00931631	0.0211241	yes	down		maker-Fvb2-3-snap-gene-18.45	PREDICTED: WAT1-related protein At4g08290 [Fragaria vesca subsp. vesca]	1.1341	2.05365e-18	1.98745e-17	yes	up
maker-Fvb6-4-augustus-gene-242.23	PREDICTED: ABC transporter G family member 29 [Fragaria vesca subsp. vesca]	-1.09672	0.0140554	0.030621	yes	down		augustus_masked-Fvb2-4-processed-gene-5.2	PREDICTED: auxin transporter-like protein 2 [Fragaria vesca subsp. vesca]	1.11098	2.56647e-22	3.00513e-21	yes	up
MSTRG.33151	putative armadillo-like helical, condensin subunit 1/Condensin-2 complex subunit D3 [Rosa chinensis]	-1.4733	4.51152e-06	1.72294e-05	yes	down		maker-Fvb6-1-augustus-gene-240.30	PREDICTED: expansin-A9-like [Fragaria vesca subsp. vesca]	1.5207	6.63913e-12	4.3015e-11	yes	up
snap_masked-Fvb6-4-processed-gene-308.24	PREDICTED: uncharacterized protein LOC101301060 [Fragaria vesca subsp. vesca]	-1.36395	4.81781e-89	3.22271e-87	yes	down		maker-Fvb6-2-snap-gene-163.55	PREDICTED: uncharacterized protein LOC101313325 [Fragaria vesca subsp. vesca]	1.47885	3.64519e-28	5.47917e-27	yes	up
maker-Fvb2-1-snap-gene-254.74	PREDICTED: uncharacterized protein LOC103321333 [Prunus mume]	-2.55659	1.69157e-34	3.17065e-33	yes	down		maker-Fvb7-2-augustus-gene-185.48	PREDICTED: probable serine/threonine-protein kinase At1g01540 [Fragaria vesca subsp. vesca]	2.96506	1.65095e-140	2.30072e-138	yes	up
maker-Fvb3-2-snap-gene-170.39	PREDICTED: transcription factor E2FB [Fragaria vesca subsp. vesca]	-1.02333	4.15889e-23	5.03379e-22	yes	down		maker-Fvb3-1-snap-gene-270.44	linoleate 13S-lipoxygenase 3-1, chloroplastic-like isoform X1 [Rosa chinensis]	2.75276	5.37699e-07	2.27811e-06	yes	up
MSTRG.12212	putative transcription factor C2H2 family [Rosa chinensis]	-1.08095	0.000302435	0.000902174	yes	down		augustus_masked-Fvb2-3-processed-gene-63.17	PREDICTED: zinc finger protein ZAT10 [Fragaria vesca subsp. vesca]	2.97295	6.53844e-81	3.71451e-79	yes	up
maker-Fvb3-2-snap-gene-230.26	PREDICTED: uncharacterized protein LOC101301286 [Fragaria vesca subsp. vesca]	-2.09449	0.00830133	0.0190495	yes	down		snap_masked-Fvb1-3-processed-gene-157.10	PREDICTED: uncharacterized protein LOC105349534 isoform X4 [Fragaria vesca subsp. vesca]	2.68186	5.60417e-05	0.000186669	yes	up
MSTRG.36618	PREDICTED: succinate dehydrogenase assembly factor 1, mitochondrial [Fragaria vesca subsp. vesca]	-1.13671	0.000292223	0.000873669	yes	down		augustus_masked-Fvb6-3-processed-gene-17.16	PREDICTED: denticleless protein homolog [Fragaria vesca subsp. vesca]	1.40206	0.00147779	0.00392485	yes	up
maker-Fvb5-3-augustus-gene-205.40	PREDICTED: cytochrome P450 78A5 [Fragaria vesca subsp. vesca]	-1.45655	0.000207891	0.000636114	yes	down		maker-Fvb1-1-snap-gene-217.54	PREDICTED: cyclic nucleotide-gated ion channel 1-like [Fragaria vesca subsp. vesca]	2.18815	1.28372e-11	8.14567e-11	yes	up
maker-Fvb3-4-snap-gene-39.57	PREDICTED: peroxidase 4-like [Fragaria vesca subsp. vesca]	-1.54435	7.48793e-13	5.1982e-12	yes	down		maker-Fvb7-3-augustus-gene-27.63	PREDICTED: probable membrane-associated kinase regulator 6 [Fragaria vesca subsp. vesca]	1.41885	2.10348e-09	1.1215e-08	yes	up
MSTRG.62368	lysine-rich arabinogalactan protein 18 [Rosa chinensis]	-1.46318	0.0141293	0.0307681	yes	down		MSTRG.2796	PREDICTED: endochitinase-like [Fragaria vesca subsp. vesca]	1.50962	2.30827e-26	3.21383e-25	yes	up
maker-Fvb2-3-augustus-gene-80.28	PREDICTED: ethylene-responsive transcription factor SHINE 2-like [Fragaria vesca subsp. vesca]	-1.11388	0.0031461	0.00786898	yes	down		MSTRG.28930	hypothetical protein RchiOBHm_Chr4g0436131 [Rosa chinensis]	1.79588	0.00608654	0.0143716	yes	up
augustus_masked-Fvb6-3-processed-gene-62.2	PREDICTED: zinc finger CCCH domain-containing protein 3 [Fragaria vesca subsp. vesca]	-1.97004	7.16887e-40	1.59885e-38	yes	down		maker-Fvb6-4-augustus-gene-236.49	PREDICTED: mitochondrial arginine transporter BAC2-like [Fragaria vesca subsp. vesca]	1.33892	0.0129058	0.0283675	yes	up
maker-Fvb7-1-augustus-gene-215.36	PREDICTED: uncharacterized protein LOC101294015 isoform X1 [Fragaria vesca subsp. vesca]	-1.01681	1.69292e-14	1.31111e-13	yes	down		maker-Fvb5-2-augustus-gene-6.65	PREDICTED: subtilisin-like protease [Fragaria vesca subsp. vesca]	1.20596	7.44681e-10	4.12111e-09	yes	up
maker-Fvb7-4-augustus-gene-150.22	PREDICTED: cytochrome c oxidase-assembly factor COX23, mitochondrial [Fragaria vesca subsp. vesca]	-1.0225	1.08553e-14	8.50235e-14	yes	down		MSTRG.26279	PREDICTED: calcium-transporting ATPase 12, plasma membrane-type-like [Fragaria vesca subsp. vesca]	1.54811	8.31931e-73	4.03362e-71	yes	up
maker-Fvb2-3-augustus-gene-33.39	dihydroflavonol 4-reductase [Fragaria x ananassa]	-1.78338	0.000943919	0.0025946	yes	down		maker-Fvb4-3-augustus-gene-26.32	PREDICTED: auxin efflux carrier component 3-like [Fragaria vesca subsp. vesca]	1.11879	2.84827e-29	4.48968e-28	yes	up
maker-Fvb3-2-augustus-gene-70.44	PREDICTED: vacuolar-sorting receptor 6 [Fragaria vesca subsp. vesca]	-1.74484	4.48931e-138	6.01031e-136	yes	down		augustus_masked-Fvb5-3-processed-gene-173.0	PREDICTED: aspartic proteinase nepenthesin-2 [Fragaria vesca subsp. vesca]	3.95613	5.06972e-18	4.79922e-17	yes	up
snap_masked-Fvb2-4-processed-gene-50.15	PREDICTED: uncharacterized protein LOC105349697 [Fragaria vesca subsp. vesca]	-1.88346	3.83938e-60	1.46954e-58	yes	down		maker-Fvb6-2-augustus-gene-70.34	PREDICTED: uncharacterized protein LOC101296120 [Fragaria vesca subsp. vesca]	1.12201	2.93233e-10	1.67705e-09	yes	up
maker-Fvb5-3-snap-gene-262.69	glutathione peroxidase 6, partial [Fragaria x ananassa]	-3.33176	0	0	yes	down		augustus_masked-Fvb3-4-processed-gene-60.2	PREDICTED: scarecrow-like protein 30 [Fragaria vesca subsp. vesca]	1.73478	0.000193328	0.000594006	yes	up
maker-Fvb3-4-snap-gene-232.78	PREDICTED: anthocyanidin 3-O-glucosyltransferase 2-like [Fragaria vesca subsp. vesca]	-1.36653	5.48854e-15	4.38207e-14	yes	down		maker-Fvb6-2-augustus-gene-194.42	PREDICTED: laccase-17-like [Fragaria vesca subsp. vesca]	1.46649	2.23717e-19	2.27617e-18	yes	up
maker-Fvb3-2-augustus-gene-6.50	PREDICTED: phospho-N-acetylmuramoyl-pentapeptide-transferase homolog isoform X2 [Fragaria vesca subsp. vesca]	-1.11618	2.75121e-27	3.98622e-26	yes	down		MSTRG.44049	PREDICTED: LOW QUALITY PROTEIN: pentatricopeptide repeat-containing protein At3g04130, mitochondrial-like [Fragaria vesca subsp. vesca]	1.22477	3.1831e-19	3.20984e-18	yes	up
maker-Fvb6-2-augustus-gene-206.35	PREDICTED: vacuolar cation/proton exchanger 3 [Fragaria vesca subsp. vesca]	-1.43123	7.90334e-97	5.99273e-95	yes	down		augustus_masked-Fvb3-1-processed-gene-296.7	PREDICTED: polyphenol oxidase, chloroplastic-like [Fragaria vesca subsp. vesca]	2.56495	0.000148848	0.000465203	yes	up
maker-Fvb4-4-snap-gene-12.66	PREDICTED: DEAD-box ATP-dependent RNA helicase ISE2, chloroplastic [Fragaria vesca subsp. vesca]	-1.68936	1.0438e-20	1.13266e-19	yes	down		maker-Fvb5-1-snap-gene-68.91	hypothetical protein RchiOBHm_Chr7g0187591 [Rosa chinensis]	5.15463	1.81573e-27	2.64917e-26	yes	up
maker-Fvb2-4-augustus-gene-214.53	PREDICTED: uncharacterized protein LOC101298630 [Fragaria vesca subsp. vesca]	-3.62126	2.77221e-05	9.61234e-05	yes	down		augustus_masked-Fvb5-1-processed-gene-185.8	PREDICTED: protein LYK5-like [Fragaria vesca subsp. vesca]	1.34125	5.49919e-09	2.82708e-08	yes	up
maker-Fvb6-3-augustus-gene-17.41	PREDICTED: probable galactinol--sucrose galactosyltransferase 5 [Fragaria vesca subsp. vesca]	-2.40586	1.35191e-113	1.32703e-111	yes	down		augustus_masked-Fvb2-3-processed-gene-90.4	PREDICTED: sugar transporter ERD6-like 7 [Fragaria vesca subsp. vesca]	2.27173	0.0003837	0.00112575	yes	up
maker-Fvb5-3-snap-gene-269.58	uncharacterized protein LOC112176076 [Rosa chinensis]	-1.00845	1.63609e-16	1.42852e-15	yes	down		MSTRG.8020	PREDICTED: uncharacterized protein LOC101312560 [Fragaria vesca subsp. vesca]	1.4759	6.0085e-43	1.47331e-41	yes	up
maker-Fvb1-1-augustus-gene-257.54	PREDICTED: uncharacterized protein LOC101305100 [Fragaria vesca subsp. vesca]	-2.05449	1.82983e-131	2.26821e-129	yes	down		MSTRG.11890	PREDICTED: auxin-induced protein 15A-like [Fragaria vesca subsp. vesca]	3.12235	0.000124585	0.000394127	yes	up
maker-Fvb3-1-augustus-gene-12.20	PREDICTED: ABC transporter C family member 10-like [Fragaria vesca subsp. vesca]	-2.94436	0	0	yes	down		maker-Fvb5-2-augustus-gene-57.24	PREDICTED: toll/interleukin-1 receptor-like protein isoform X2 [Fragaria vesca subsp. vesca]	1.16459	0.00826901	0.0189839	yes	up
augustus_masked-Fvb5-2-processed-gene-72.8	PREDICTED: oleosin 1 [Fragaria vesca subsp. vesca]	-1.47007	1.67031e-74	8.34485e-73	yes	down		maker-Fvb1-3-snap-gene-127.47	lysM domain receptor-like kinase 3 [Rosa chinensis]	2.3867	8.87516e-67	3.8724e-65	yes	up
maker-Fvb6-4-augustus-gene-96.34	PREDICTED: rop guanine nucleotide exchange factor 7 [Fragaria vesca subsp. vesca]	-1.08289	0.00448454	0.0108708	yes	down		maker-Fvb4-3-snap-gene-127.53	PREDICTED: major allergen Pru av 1-like [Fragaria vesca subsp. vesca]	2.53627	2.10946e-27	3.07383e-26	yes	up
maker-Fvb5-2-augustus-gene-28.32	PREDICTED: mitochondrial inner membrane protein OXA1 [Fragaria vesca subsp. vesca]	-1.48357	3.29603e-29	5.17066e-28	yes	down		MSTRG.25985	PREDICTED: ethylene-responsive transcription factor 4 [Fragaria vesca subsp. vesca]	1.8385	7.33665e-23	8.8082e-22	yes	up
maker-Fvb6-3-snap-gene-103.59	PREDICTED: ATPase 10, plasma membrane-type [Fragaria vesca subsp. vesca]	-1.18534	6.20636e-51	1.88333e-49	yes	down		augustus_masked-Fvb5-3-processed-gene-111.1	PREDICTED: calvin cycle protein CP12-3, chloroplastic [Fragaria vesca subsp. vesca]	1.08674	3.81312e-07	1.643e-06	yes	up
maker-Fvb1-4-augustus-gene-9.57	PREDICTED: anthocyanidin 3-O-glucosyltransferase 7-like [Fragaria vesca subsp. vesca]	-3.69474	1.36496e-15	1.13266e-14	yes	down		maker-Fvb5-1-augustus-gene-115.34	PREDICTED: protein arginine N-methyltransferase 7 [Fragaria vesca subsp. vesca]	1.20448	7.38314e-07	3.07829e-06	yes	up
maker-Fvb1-4-snap-gene-65.79	PREDICTED: cytochrome P450 90B1 [Fragaria vesca subsp. vesca]	-2.20678	6.67808e-51	2.02313e-49	yes	down		maker-Fvb2-4-snap-gene-173.56	PREDICTED: uncharacterized protein LOC101301347 [Fragaria vesca subsp. vesca]	1.21996	2.52754e-43	6.26275e-42	yes	up
maker-Fvb5-2-augustus-gene-24.26	PREDICTED: ubiquinone biosynthesis monooxygenase COQ6 [Fragaria vesca subsp. vesca]	-1.01091	3.10056e-16	2.6662e-15	yes	down		maker-Fvb7-2-augustus-gene-33.24	uncharacterized protein LOC112170575 [Rosa chinensis]	2.36647	9.82582e-46	2.60594e-44	yes	up
maker-Fvb6-2-augustus-gene-186.33	PREDICTED: uncharacterized protein LOC101298051 [Fragaria vesca subsp. vesca]	-1.07305	1.49623e-08	7.37184e-08	yes	down		maker-Fvb7-1-snap-gene-259.48	PREDICTED: cytochrome P450 90A1 [Fragaria vesca subsp. vesca]	1.2283	1.08815e-48	3.11107e-47	yes	up
maker-Fvb2-3-augustus-gene-9.52	hypothetical protein RchiOBHm_Chr6g0298931 [Rosa chinensis]	-1.00537	0.00163535	0.0043108	yes	down		augustus_masked-Fvb2-1-processed-gene-209.4	PREDICTED: graves disease carrier protein [Fragaria vesca subsp. vesca]	1.03314	3.99308e-06	1.53444e-05	yes	up
snap_masked-Fvb5-3-processed-gene-204.23	PREDICTED: replication protein A 70 kDa DNA-binding subunit B [Fragaria vesca subsp. vesca]	-1.81885	2.17177e-11	1.35406e-10	yes	down		MSTRG.12893	PREDICTED: parathymosin-like [Fragaria vesca subsp. vesca]	1.01639	7.58572e-07	3.15961e-06	yes	up
maker-Fvb1-3-augustus-gene-128.40	phospho-2-dehydro-3-deoxyheptonate aldolase [Fragaria x ananassa]	-2.26977	6.63864e-200	1.79587e-197	yes	down		augustus_masked-Fvb6-4-processed-gene-5.17	PREDICTED: uncharacterized protein LOC105352542 [Fragaria vesca subsp. vesca]	1.16868	1.86169e-05	6.6046e-05	yes	up
maker-Fvb7-2-snap-gene-241.69	PREDICTED: GDSL esterase/lipase CPRD49-like [Fragaria vesca subsp. vesca]	-1.40019	0.00101818	0.00278235	yes	down		maker-Fvb5-1-augustus-gene-4.58	PREDICTED: flavonoid 3&apos;,5&apos;-hydroxylase-like [Fragaria vesca subsp. vesca]	1.04823	1.12979e-65	4.81081e-64	yes	up
maker-Fvb3-2-augustus-gene-123.46	PREDICTED: uncharacterized protein LOC101300989 [Fragaria vesca subsp. vesca]	-1.33399	0.000208172	0.000636954	yes	down		snap_masked-Fvb2-2-processed-gene-138.14	disheveled-associated activator of morphogenesis 1-A-like [Rosa chinensis]	1.39112	9.54642e-07	3.93265e-06	yes	up
maker-Fvb3-1-augustus-gene-243.31	PREDICTED: YTH domain-containing family protein 2 [Fragaria vesca subsp. vesca]	-1.03791	7.9655e-46	2.11561e-44	yes	down		maker-Fvb2-4-augustus-gene-252.51	PREDICTED: uncharacterized protein LOC101304935 [Fragaria vesca subsp. vesca]	1.47459	9.88925e-32	1.70844e-30	yes	up
maker-Fvb3-3-augustus-gene-155.22	PREDICTED: NAC domain-containing protein 72-like [Fragaria vesca subsp. vesca]	-3.60271	1.03741e-12	7.1324e-12	yes	down		maker-Fvb6-4-augustus-gene-13.52	PREDICTED: xyloglucan glycosyltransferase 4-like isoform X1 [Fragaria vesca subsp. vesca]	2.7721	4.8088e-24	6.05219e-23	yes	up
maker-Fvb7-1-snap-gene-285.67	PREDICTED: transmembrane ascorbate ferrireductase 1 [Fragaria vesca subsp. vesca]	-1.02811	2.64616e-42	6.35796e-41	yes	down		snap_masked-Fvb5-1-processed-gene-19.48	PREDICTED: uncharacterized protein LOC101295341 isoform X1 [Fragaria vesca subsp. vesca]	3.25056	3.06159e-09	1.61076e-08	yes	up
snap_masked-Fvb7-4-processed-gene-40.32	PREDICTED: phosphoglucan phosphatase LSF2, chloroplastic [Fragaria vesca subsp. vesca]	-1.15916	2.19123e-27	3.18893e-26	yes	down		MSTRG.54312	PREDICTED: receptor-like protein 12 isoform X3 [Fragaria vesca subsp. vesca]	2.38478	0.000259807	0.000783192	yes	up
MSTRG.24465	PREDICTED: DEAD-box ATP-dependent RNA helicase 37-like [Fragaria vesca subsp. vesca]	-1.12675	3.78322e-47	1.04212e-45	yes	down		maker-Fvb4-4-augustus-gene-163.31	PREDICTED: inositol transporter 1 isoform X1 [Fragaria vesca subsp. vesca]	1.58434	2.33801e-55	7.96153e-54	yes	up
maker-Fvb7-1-augustus-gene-300.57	PREDICTED: two-component response regulator-like APRR5 [Fragaria vesca subsp. vesca]	-3.39171	0	0	yes	down		maker-Fvb3-4-augustus-gene-187.42	PREDICTED: long chain acyl-CoA synthetase 6, peroxisomal [Fragaria vesca subsp. vesca]	1.49877	3.67117e-08	1.74718e-07	yes	up
maker-Fvb5-3-snap-gene-240.83	PREDICTED: C2 and GRAM domain-containing protein At5g50170 [Fragaria vesca subsp. vesca]	-1.19825	0.000960129	0.00263498	yes	down		maker-Fvb7-4-augustus-gene-52.51	PREDICTED: uncharacterized protein LOC101311909 [Fragaria vesca subsp. vesca]	1.37538	7.50765e-07	3.12907e-06	yes	up
maker-Fvb5-3-augustus-gene-25.34	PREDICTED: uncharacterized protein LOC101312060 [Fragaria vesca subsp. vesca]	-1.03385	5.95615e-10	3.32235e-09	yes	down		maker-Fvb6-2-snap-gene-65.27	PREDICTED: putative disease resistance protein RGA3 [Fragaria vesca subsp. vesca]	3.02483	1.48424e-205	4.25278e-203	yes	up
maker-Fvb3-2-augustus-gene-174.30	PREDICTED: outer envelope protein 80, chloroplastic [Fragaria vesca subsp. vesca]	-1.25028	8.48342e-12	5.45987e-11	yes	down		augustus_masked-Fvb1-2-processed-gene-13.4	PREDICTED: leucine-rich repeat extensin-like protein 4 [Fragaria vesca subsp. vesca]	1.61763	0.0108791	0.0243221	yes	up
augustus_masked-Fvb2-2-processed-gene-99.16	PREDICTED: probable anion transporter 5 [Fragaria vesca subsp. vesca]	-2.17676	0.00323549	0.00807597	yes	down		maker-Fvb5-3-augustus-gene-198.47	PREDICTED: thioredoxin-like 1-2, chloroplastic [Fragaria vesca subsp. vesca]	1.07676	1.53654e-07	6.86744e-07	yes	up
maker-Fvb3-4-snap-gene-253.46	PREDICTED: abscisic acid receptor PYL12-like [Fragaria vesca subsp. vesca]	-1.80395	2.38441e-49	6.93136e-48	yes	down		MSTRG.18734	PREDICTED: uncharacterized protein LOC101315033 isoform X1 [Fragaria vesca subsp. vesca]	2.07903	6.02557e-09	3.08493e-08	yes	up
maker-Fvb5-3-augustus-gene-32.26	PREDICTED: transcription factor bHLH96 [Fragaria vesca subsp. vesca]	-4.76202	5.87656e-07	2.47812e-06	yes	down		snap_masked-Fvb4-3-processed-gene-21.34	G-type lectin S-receptor-like serine/threonine-protein kinase At1g34300 [Rosa chinensis]	1.6269	2.2269e-28	3.37933e-27	yes	up
augustus_masked-Fvb2-1-processed-gene-190.13	PREDICTED: glycine-rich cell wall structural protein 1-like [Fragaria vesca subsp. vesca]	-1.58255	4.48508e-14	3.38297e-13	yes	down		maker-Fvb6-3-augustus-gene-65.59	PREDICTED: BTB/POZ domain-containing protein At5g48130 [Fragaria vesca subsp. vesca]	2.49738	0.00764953	0.0177044	yes	up
augustus_masked-Fvb1-2-processed-gene-35.18	PREDICTED: scopoletin glucosyltransferase-like [Fragaria vesca subsp. vesca]	-1.28312	4.08376e-06	1.56771e-05	yes	down		maker-Fvb1-1-augustus-gene-192.61	PREDICTED: probable 2-oxoglutarate-dependent dioxygenase At3g49630 [Fragaria vesca subsp. vesca]	1.28913	3.57431e-11	2.19416e-10	yes	up
MSTRG.65291	PREDICTED: pheophytinase, chloroplastic [Fragaria vesca subsp. vesca]	-1.68843	2.74093e-77	1.45387e-75	yes	down		maker-Fvb3-4-snap-gene-245.56	PREDICTED: linoleate 13S-lipoxygenase 3-1, chloroplastic-like [Fragaria vesca subsp. vesca]	3.18755	4.57637e-08	2.15977e-07	yes	up
augustus_masked-Fvb5-4-processed-gene-64.7	PREDICTED: malate dehydrogenase, chloroplastic [Fragaria vesca subsp. vesca]	-2.00138	1.59547e-170	3.23941e-168	yes	down		MSTRG.6291	hypothetical protein RchiOBHm_Chr6g0310131 [Rosa chinensis]	1.72485	7.42891e-10	4.11169e-09	yes	up
maker-Fvb4-3-augustus-gene-1.59	PREDICTED: probable prefoldin subunit 5 [Fragaria vesca subsp. vesca]	-1.09886	3.79275e-12	2.50299e-11	yes	down		maker-Fvb2-2-augustus-gene-199.28	PREDICTED: probable Xaa-Pro aminopeptidase P [Fragaria vesca subsp. vesca]	1.481	1.8767e-22	2.21496e-21	yes	up
maker-Fvb6-4-augustus-gene-119.31	PREDICTED: phosphatidylinositol 4-phosphate 5-kinase 9 [Fragaria vesca subsp. vesca]	-1.02842	4.94578e-46	1.32352e-44	yes	down		augustus_masked-Fvb3-3-processed-gene-7.9	PREDICTED: polyphenol oxidase, chloroplastic-like [Fragaria vesca subsp. vesca]	2.62972	1.2481e-10	7.35772e-10	yes	up
snap_masked-Fvb6-3-processed-gene-145.22	PREDICTED: monothiol glutaredoxin-S15, mitochondrial [Fragaria vesca subsp. vesca]	-1.18621	3.24704e-12	2.15243e-11	yes	down		maker-Fvb7-1-augustus-gene-187.31	PREDICTED: aquaporin PIP1-3 [Fragaria vesca subsp. vesca]	1.87793	8.21463e-145	1.21471e-142	yes	up
MSTRG.66641	--	-1.02152	1.46654e-25	1.97549e-24	yes	down		augustus_masked-Fvb5-1-processed-gene-157.4	PREDICTED: CSC1-like protein At1g32090 [Fragaria vesca subsp. vesca]	1.27025	0.0124602	0.0274903	yes	up
maker-Fvb2-3-snap-gene-83.81	PREDICTED: glutathione S-transferase F13-like [Fragaria vesca subsp. vesca]	-2.41054	2.02813e-213	6.32338e-211	yes	down		augustus_masked-Fvb5-1-processed-gene-198.6	PREDICTED: auxin-induced protein 15A-like [Fragaria vesca subsp. vesca]	2.03719	6.64928e-17	5.95032e-16	yes	up
MSTRG.1090	PREDICTED: cytochrome P450 90B1 [Fragaria vesca subsp. vesca]	-2.00757	3.3028e-24	4.18542e-23	yes	down		MSTRG.18089	putative alpha/Beta hydrolase [Rosa chinensis]	1.4887	2.93038e-15	2.37708e-14	yes	up
MSTRG.23482	PREDICTED: uncharacterized protein LOC101315024 isoform X1 [Fragaria vesca subsp. vesca]	-1.6175	4.97618e-56	1.7187e-54	yes	down		maker-Fvb7-4-snap-gene-36.87	PREDICTED: receptor-like protein 12 [Fragaria vesca subsp. vesca]	1.022	0.0082034	0.0188553	yes	up
maker-Fvb4-3-augustus-gene-309.27	PREDICTED: uncharacterized protein LOC101303794 [Fragaria vesca subsp. vesca]	-1.24169	2.50187e-46	6.74024e-45	yes	down		maker-Fvb1-3-snap-gene-170.35	PREDICTED: peptidyl-prolyl cis-trans isomerase FKBP43 isoform X1 [Fragaria vesca subsp. vesca]	1.22856	0.0010386	0.00283398	yes	up
augustus_masked-Fvb6-1-processed-gene-348.1	PREDICTED: uncharacterized protein LOC105351969 [Fragaria vesca subsp. vesca]	-1.55783	0.000187085	0.000576325	yes	down		maker-Fvb6-1-snap-gene-335.54	PREDICTED: putative FBD-associated F-box protein At5g56440 [Fragaria vesca subsp. vesca]	1.777	7.08789e-15	5.6219e-14	yes	up
maker-Fvb6-4-augustus-gene-89.32	PREDICTED: downF0161 protein At3g09310 [Fragaria vesca subsp. vesca]	-1.11003	1.12129e-66	4.87619e-65	yes	down		augustus_masked-Fvb7-3-processed-gene-119.6	putative non-specific serine/threonine protein kinase [Rosa chinensis]	1.34523	4.13814e-05	0.000140281	yes	up
maker-Fvb4-3-snap-gene-78.71	PREDICTED: uncharacterized protein LOC101308762 [Fragaria vesca subsp. vesca]	-1.41423	2.3331e-26	3.24791e-25	yes	down		maker-Fvb4-1-augustus-gene-193.33	PREDICTED: formin-like protein 8 [Fragaria vesca subsp. vesca]	1.51845	3.67855e-32	6.44208e-31	yes	up
snap_masked-Fvb2-3-processed-gene-102.36	PREDICTED: glutathione reductase, chloroplastic [Fragaria vesca subsp. vesca]	-1.08738	1.53522e-34	2.88111e-33	yes	down		snap_masked-Fvb2-1-processed-gene-235.30	PREDICTED: myb-related protein 3R-1 [Fragaria vesca subsp. vesca]	1.16176	0.00771624	0.0178404	yes	up
augustus_masked-Fvb7-1-processed-gene-83.5	PREDICTED: nucleolar GTP-binding protein 1 [Fragaria vesca subsp. vesca]	-1.05155	0.000600885	0.00170767	yes	down		maker-Fvb2-3-snap-gene-33.59	PREDICTED: jasmonate O-methyltransferase-like [Fragaria vesca subsp. vesca]	1.96679	6.97346e-37	1.41963e-35	yes	up
maker-Fvb2-4-augustus-gene-118.16	PREDICTED: uncharacterized protein LOC101310567 [Fragaria vesca subsp. vesca]	-1.58061	1.25604e-13	9.21112e-13	yes	down		maker-Fvb5-2-augustus-gene-116.38	PREDICTED: uncharacterized protein LOC101314377 isoform X2 [Fragaria vesca subsp. vesca]	1.56295	7.95036e-08	3.66924e-07	yes	up
maker-Fvb2-1-augustus-gene-179.55	PREDICTED: uncharacterized protein LOC101293734 [Fragaria vesca subsp. vesca]	-3.15789	0.00890945	0.0203023	yes	down		maker-Fvb7-3-augustus-gene-77.60	PREDICTED: beta-hexosaminidase 1 [Fragaria vesca subsp. vesca]	1.15349	6.20129e-28	9.24424e-27	yes	up
maker-Fvb2-3-augustus-gene-182.28	PREDICTED: uncharacterized protein LOC101299254 [Fragaria vesca subsp. vesca]	-1.56705	5.28761e-31	8.91536e-30	yes	down		maker-Fvb5-4-augustus-gene-236.42	putative tetratricopeptide-like helical domain-containing protein [Rosa chinensis]	1.01443	2.00138e-17	1.84171e-16	yes	up
maker-Fvb1-2-snap-gene-235.14	PREDICTED: nudix hydrolase 18, mitochondrial-like [Fragaria vesca subsp. vesca]	-3.05297	0.00112086	0.00304108	yes	down		MSTRG.43779	PREDICTED: protein SENSITIVITY TO RED LIGHT REDUCED 1 [Fragaria vesca subsp. vesca]	1.37232	1.14997e-22	1.37078e-21	yes	up
augustus_masked-Fvb3-1-processed-gene-292.12	hypothetical protein RchiOBHm_Chr5g0014631 [Rosa chinensis]	-1.85867	4.96417e-17	4.46974e-16	yes	down		augustus_masked-Fvb4-4-processed-gene-3.2	PREDICTED: nicotinamidase 2-like [Fragaria vesca subsp. vesca]	1.30131	3.54043e-07	1.53103e-06	yes	up
snap_masked-Fvb4-3-processed-gene-91.44	hypothetical protein RchiOBHm_Chr4g0433121 [Rosa chinensis]	-1.34357	2.4633e-43	6.10686e-42	yes	down		maker-Fvb6-3-snap-gene-122.57	beta-galactosidase [Fragaria x ananassa]	1.70514	4.96312e-27	7.11928e-26	yes	up
maker-Fvb5-1-snap-gene-53.76	putative aminoacyltransferase, E1 ubiquitin-activating enzyme [Rosa chinensis]	-1.18504	0.00436843	0.010612	yes	down		MSTRG.29771	PREDICTED: V-type proton ATPase subunit a1 [Fragaria vesca subsp. vesca]	1.22268	3.37256e-11	2.07516e-10	yes	up
maker-Fvb2-4-snap-gene-15.54	PREDICTED: serine carboxypeptidase-like 18 [Fragaria vesca subsp. vesca]	-1.76917	5.39195e-102	4.47995e-100	yes	down		maker-Fvb1-1-augustus-gene-113.22	PREDICTED: WD repeat-containing protein 44 [Fragaria vesca subsp. vesca]	1.41578	0.000460452	0.00133531	yes	up
maker-Fvb1-4-snap-gene-125.52	PREDICTED: acidic leucine-rich nuclear phosphoprotein 32 family member B [Fragaria vesca subsp. vesca]	-1.20432	8.09517e-57	2.85382e-55	yes	down		augustus_masked-Fvb1-2-processed-gene-149.8	PREDICTED: putative phosphatidylinositol N-acetylglucosaminyltransferase subunit C [Fragaria vesca subsp. vesca]	3.03251	0.0126047	0.0277736	yes	up
maker-Fvb4-3-augustus-gene-8.31	PREDICTED: protein NRT1/ PTR FAMILY 2.13-like [Fragaria vesca subsp. vesca]	-1.73173	5.77634e-35	1.09838e-33	yes	down		maker-Fvb7-2-snap-gene-220.52	PREDICTED: uncharacterized protein LOC101308624 [Fragaria vesca subsp. vesca]	1.60536	6.05308e-56	2.08516e-54	yes	up
maker-Fvb1-1-augustus-gene-245.44	PREDICTED: phytochrome E-like isoform X1 [Fragaria vesca subsp. vesca]	-1.27152	6.08321e-50	1.79618e-48	yes	down		maker-Fvb6-1-augustus-gene-24.42	PREDICTED: apoptosis-enhancing nuclease isoform X1 [Fragaria vesca subsp. vesca]	1.99926	0.00426754	0.0103894	yes	up
maker-Fvb6-3-snap-gene-18.65	PREDICTED: cysteine-rich receptor-like protein kinase 42 [Fragaria vesca subsp. vesca]	-2.77081	6.37988e-18	6.01595e-17	yes	down		maker-Fvb4-3-augustus-gene-67.49	PREDICTED: uncharacterized protein LOC101305160 isoform X1 [Fragaria vesca subsp. vesca]	3.02589	7.51605e-135	9.7503e-133	yes	up
MSTRG.51063	PREDICTED: uncharacterized protein LOC101312994 [Fragaria vesca subsp. vesca]	-1.22314	1.38619e-09	7.50952e-09	yes	down		maker-Fvb1-3-augustus-gene-156.30	hypothetical protein RchiOBHm_Chr2g0118101 [Rosa chinensis]	2.47808	1.644e-28	2.51052e-27	yes	up
maker-Fvb3-4-augustus-gene-207.39	PREDICTED: cytochrome P450 CYP72A219-like [Fragaria vesca subsp. vesca]	-1.52396	3.50411e-28	5.27486e-27	yes	down		snap_masked-Fvb5-4-processed-gene-68.22	isochorismate synthase 1, chloroplastic-like isoform X2 [Rosa chinensis]	1.14304	1.07669e-48	3.07927e-47	yes	up
maker-Fvb3-4-augustus-gene-184.17	PREDICTED: CBS domain-containing protein CBSX5-like [Fragaria vesca subsp. vesca]	-1.11236	3.43181e-14	2.60497e-13	yes	down		snap_masked-Fvb2-4-processed-gene-214.36	PREDICTED: uncharacterized protein LOC101303764 [Fragaria vesca subsp. vesca]	3.8077	0.0034209	0.00849095	yes	up
maker-Fvb6-2-augustus-gene-155.21	PREDICTED: growth-regulating factor 3 [Fragaria vesca subsp. vesca]	-1.95186	5.33583e-12	3.4821e-11	yes	down		maker-Fvb7-2-snap-gene-50.30	PREDICTED: diphosphomevalonate decarboxylase [Fragaria vesca subsp. vesca]	1.53747	1.46325e-63	6.00554e-62	yes	up
maker-Fvb6-1-augustus-gene-218.21	PREDICTED: sucrose-phosphatase 1 [Fragaria vesca subsp. vesca]	-1.55193	1.3925e-82	8.24175e-81	yes	down		maker-Fvb4-3-snap-gene-34.74	PREDICTED: phosphate transporter PHO1 homolog 3-like [Fragaria vesca subsp. vesca]	2.51559	5.51651e-24	6.92961e-23	yes	up
maker-Fvb3-3-augustus-gene-3.48	PREDICTED: protein ODORANT1-like [Fragaria vesca subsp. vesca]	-2.37867	3.49021e-11	2.14554e-10	yes	down		maker-Fvb1-4-augustus-gene-43.66	PREDICTED: putative pectinesterase/pectinesterase inhibitor 45 [Fragaria vesca subsp. vesca]	1.11507	6.66582e-09	3.40061e-08	yes	up
maker-Fvb6-4-augustus-gene-43.52	PREDICTED: uncharacterized protein LOC105352058 [Fragaria vesca subsp. vesca]	-1.37547	3.66283e-10	2.07946e-09	yes	down		augustus_masked-Fvb5-2-processed-gene-218.3	PREDICTED: mitochondrial uncoupling protein 4 [Fragaria vesca subsp. vesca]	1.55498	7.75011e-10	4.28097e-09	yes	up
maker-Fvb1-3-snap-gene-8.44	PREDICTED: cysteine-rich receptor-like protein kinase 7 isoform X2 [Fragaria vesca subsp. vesca]	-1.70992	2.15083e-44	5.47083e-43	yes	down		snap_masked-Fvb6-3-processed-gene-311.30	PREDICTED: uncharacterized protein LOC105351439 [Fragaria vesca subsp. vesca]	1.23094	0.00396551	0.00972047	yes	up
augustus_masked-Fvb2-4-processed-gene-163.3	PREDICTED: inorganic phosphate transporter 1-4 [Fragaria vesca subsp. vesca]	-1.35684	2.27263e-92	1.61163e-90	yes	down		maker-Fvb4-4-augustus-gene-124.27	PREDICTED: uncharacterized protein LOC101310110 [Fragaria vesca subsp. vesca]	4.49805	0	0	yes	up
augustus_masked-Fvb1-2-processed-gene-38.12	PREDICTED: adenine nucleotide transporter BT1, chloroplastic/mitochondrial [Fragaria vesca subsp. vesca]	-1.02589	4.83451e-22	5.59812e-21	yes	down		MSTRG.36626	PREDICTED: uncharacterized protein LOC105351905 [Fragaria vesca subsp. vesca]	1.36279	8.1556e-15	6.44156e-14	yes	up
maker-Fvb3-1-augustus-gene-57.19	PREDICTED: abscisic acid 8&apos;-hydroxylase 2 [Fragaria vesca subsp. vesca]	-1.43132	0.00479053	0.0115429	yes	down		maker-Fvb3-1-augustus-gene-224.57	PREDICTED: F-box/FBD/LRR-repeat protein At4g26340-like [Fragaria vesca subsp. vesca]	1.06309	3.85788e-06	1.48528e-05	yes	up
maker-Fvb1-2-augustus-gene-64.50	PREDICTED: peroxiredoxin Q, chloroplastic [Fragaria vesca subsp. vesca]	-1.6672	4.32885e-122	4.73989e-120	yes	down		maker-Fvb2-2-augustus-gene-126.25	PREDICTED: trihelix transcription factor GT-2-like [Fragaria vesca subsp. vesca]	1.14483	6.21279e-26	8.49707e-25	yes	up
maker-Fvb5-1-augustus-gene-78.42	PREDICTED: uncharacterized protein LOC101298320 [Fragaria vesca subsp. vesca]	-1.2091	1.69243e-29	2.70107e-28	yes	down		maker-Fvb2-3-augustus-gene-183.23	PREDICTED: la-related protein 6C [Fragaria vesca subsp. vesca]	2.16799	2.91777e-09	1.53861e-08	yes	up
augustus_masked-Fvb5-4-processed-gene-23.12	PREDICTED: uncharacterized protein LOC105351441 [Fragaria vesca subsp. vesca]	-1.07843	4.98493e-13	3.5037e-12	yes	down		maker-Fvb3-2-snap-gene-96.32	PREDICTED: F-box/FBD/LRR-repeat protein At1g78750-like [Fragaria vesca subsp. vesca]	2.02501	3.66665e-05	0.000125081	yes	up
maker-Fvb7-2-augustus-gene-233.60	PREDICTED: uncharacterized protein LOC101311322 [Fragaria vesca subsp. vesca]	-1.71501	7.37302e-32	1.27927e-30	yes	down		MSTRG.17505	PREDICTED: serine/arginine repetitive matrix protein 1-like [Fragaria vesca subsp. vesca]	2.4105	0.0208175	0.0435469	yes	up
maker-Fvb1-4-augustus-gene-41.49	PREDICTED: peroxiredoxin Q, chloroplastic [Fragaria vesca subsp. vesca]	-2.28067	3.75737e-208	1.11122e-205	yes	down		maker-Fvb7-1-augustus-gene-3.30	PREDICTED: uncharacterized protein LOC101308217 [Fragaria vesca subsp. vesca]	1.22521	8.04044e-11	4.80649e-10	yes	up
augustus_masked-Fvb1-2-processed-gene-233.6	uncharacterized protein LOC112195238 [Rosa chinensis]	-4.83486	4.07123e-06	1.56297e-05	yes	down		MSTRG.45928	--	2.26156	7.00258e-81	3.96839e-79	yes	up
MSTRG.24041	PREDICTED: zinc finger protein CONSTANS-LIKE 7 [Fragaria vesca subsp. vesca]	-3.69268	1.00591e-303	7.70996e-301	yes	down		augustus_masked-Fvb5-4-processed-gene-0.5	PREDICTED: 14 kDa proline-rich protein DC2.15 [Fragaria vesca subsp. vesca]	2.20982	9.88765e-23	1.18123e-21	yes	up
maker-Fvb2-4-snap-gene-53.37	uncharacterized protein LOC112170876 [Rosa chinensis]	-1.05404	5.33022e-07	2.25933e-06	yes	down		MSTRG.24257	PREDICTED: probable disease resistance protein At4g27220 [Fragaria vesca subsp. vesca]	1.48321	3.90205e-33	7.03991e-32	yes	up
maker-Fvb6-1-snap-gene-261.46	PREDICTED: probable LRR receptor-like serine/threonine-protein kinase At1g67720 [Fragaria vesca subsp. vesca]	-1.04856	1.21968e-09	6.63325e-09	yes	down		maker-Fvb7-2-augustus-gene-183.46	PREDICTED: uncharacterized protein LOC101295853 [Fragaria vesca subsp. vesca]	1.68473	0.00528751	0.0126387	yes	up
maker-Fvb1-1-augustus-gene-250.63	PREDICTED: S-antigen protein-like [Fragaria vesca subsp. vesca]	-1.00324	4.45782e-20	4.68157e-19	yes	down		augustus_masked-Fvb2-2-processed-gene-224.3	PREDICTED: subtilisin-like protease [Fragaria vesca subsp. vesca]	2.09153	6.19778e-55	2.08732e-53	yes	up
augustus_masked-Fvb5-1-processed-gene-12.17	PREDICTED: glutamate--cysteine ligase, chloroplastic [Fragaria vesca subsp. vesca]	-1.00585	1.37708e-30	2.28501e-29	yes	down		maker-Fvb5-2-snap-gene-211.30	PREDICTED: TMV resistance protein N-like [Fragaria vesca subsp. vesca]	1.05809	0.0139109	0.0303364	yes	up
MSTRG.16801	PREDICTED: putative GTP-binding protein 6 [Fragaria vesca subsp. vesca]	-1.53739	0.0224302	0.0464962	yes	down		maker-Fvb4-1-snap-gene-197.51	PREDICTED: glutamate decarboxylase 4 [Fragaria vesca subsp. vesca]	1.47014	0.0211873	0.0442077	yes	up
maker-Fvb4-1-snap-gene-181.63	PREDICTED: MLP-like protein 43 [Fragaria vesca subsp. vesca]	-1.78457	6.1964e-150	9.82621e-148	yes	down		maker-Fvb5-3-augustus-gene-179.47	PREDICTED: dihydropyrimidine dehydrogenase [NADP(+)] [Fragaria vesca subsp. vesca]	1.05232	4.16848e-26	5.75072e-25	yes	up
MSTRG.32487	uncharacterized protein LOC112182887 [Rosa chinensis]	-2.74482	0.011743	0.0260516	yes	down		maker-Fvb7-3-augustus-gene-155.56	hypothetical protein RchiOBHm_Chr7g0204351 [Rosa chinensis]	3.03459	0.00200429	0.0051955	yes	up
snap_masked-Fvb7-3-processed-gene-167.12	uncharacterized protein LOC109948788 [Prunus persica]	-1.40691	1.31211e-08	6.49948e-08	yes	down		maker-Fvb6-4-augustus-gene-180.35	glucan endo-1,3-beta-glucosidase-like [Rosa chinensis]	1.34755	0.001127	0.0030562	yes	up
MSTRG.46998	extensin-like [Rosa chinensis]	-1.7475	1.3932e-16	1.22225e-15	yes	down		augustus_masked-Fvb5-1-processed-gene-86.18	PREDICTED: presenilin-like protein At2g29900 [Fragaria vesca subsp. vesca]	1.01701	0.000611164	0.00173533	yes	up
MSTRG.65170	PREDICTED: uncharacterized protein LOC101313410 isoform X1 [Fragaria vesca subsp. vesca]	-1.46706	9.47983e-05	0.000305646	yes	down		maker-Fvb4-3-augustus-gene-197.42	PREDICTED: acyl-CoA dehydrogenase family member 10 [Fragaria vesca subsp. vesca]	1.01455	1.34749e-24	1.73776e-23	yes	up
MSTRG.35696	PREDICTED: uncharacterized protein LOC101292020 [Fragaria vesca subsp. vesca]	-1.14367	2.92939e-19	2.9595e-18	yes	down		maker-Fvb6-2-snap-gene-345.61	uncharacterized protein LOC112184868 [Rosa chinensis]	1.02997	0.00338833	0.00841943	yes	up
augustus_masked-Fvb7-4-processed-gene-163.3	PREDICTED: protein NUCLEAR FUSION DEFECTIVE 4-like isoform X1 [Fragaria vesca subsp. vesca]	-2.85915	5.79707e-22	6.68663e-21	yes	down		snap_masked-Fvb4-3-processed-gene-292.24	PREDICTED: peroxisomal membrane protein PMP22 [Fragaria vesca subsp. vesca]	2.10298	0.000170079	0.000527026	yes	up
maker-Fvb1-1-snap-gene-189.39	PREDICTED: uncharacterized protein LOC101296107 [Fragaria vesca subsp. vesca]	-1.36547	6.69222e-39	1.44591e-37	yes	down		snap_masked-Fvb2-1-processed-gene-257.33	PREDICTED: deoxyuridine 5&apos;-triphosphate nucleotidohydrolase [Fragaria vesca subsp. vesca]	1.53578	0.00213933	0.00551662	yes	up
MSTRG.11769	putative RNA-directed DNA polymerase [Rosa chinensis]	-3.00424	0.00142322	0.00379097	yes	down		maker-Fvb7-4-snap-gene-178.37	PREDICTED: uncharacterized protein LOC101293822 [Fragaria vesca subsp. vesca]	1.28012	2.60288e-10	1.49337e-09	yes	up
maker-Fvb7-1-augustus-gene-162.34	PREDICTED: RING-box protein 1a-like [Fragaria vesca subsp. vesca]	-1.14207	1.31716e-16	1.15775e-15	yes	down		MSTRG.18602	PREDICTED: BTB/POZ domain-containing protein At1g04390 [Fragaria vesca subsp. vesca]	1.07118	1.93911e-28	2.9504e-27	yes	up
maker-Fvb7-4-augustus-gene-6.49	PREDICTED: two-component response regulator-like APRR5 [Fragaria vesca subsp. vesca]	-3.32437	0	0	yes	down		MSTRG.45369	PREDICTED: triacylglycerol lipase 2-like [Fragaria vesca subsp. vesca]	3.54293	2.34483e-11	1.4582e-10	yes	up
augustus_masked-Fvb5-2-processed-gene-8.0	PREDICTED: DNA-directed RNA polymerase IV subunit 1 isoform X1 [Fragaria vesca subsp. vesca]	-1.4807	0.0198721	0.0417667	yes	down		MSTRG.58356	LOW QUALITY PROTEIN: uncharacterized protein LOC112167556 [Rosa chinensis]	1.32487	1.44627e-05	5.19659e-05	yes	up
maker-Fvb3-1-snap-gene-130.53	PREDICTED: uncharacterized protein LOC101309430 [Fragaria vesca subsp. vesca]	-1.24021	5.1509e-08	2.42084e-07	yes	down		maker-Fvb4-4-snap-gene-245.37	PREDICTED: uncharacterized protein LOC101300921 [Fragaria vesca subsp. vesca]	1.26522	0.00349704	0.0086652	yes	up
maker-Fvb2-4-augustus-gene-211.35	PREDICTED: uncharacterized protein LOC101297404 [Fragaria vesca subsp. vesca]	-3.64135	8.37163e-21	9.13716e-20	yes	down		maker-Fvb7-4-snap-gene-30.67	LOW QUALITY PROTEIN: uncharacterized protein LOC112167556 [Rosa chinensis]	1.6203	6.6582e-07	2.79224e-06	yes	up
maker-Fvb5-4-augustus-gene-15.33	PREDICTED: BTB/POZ domain-containing protein At1g63850 [Fragaria vesca subsp. vesca]	-1.13606	4.60055e-07	1.96353e-06	yes	down		maker-Fvb3-1-snap-gene-11.39	PREDICTED: TMV resistance protein N-like [Fragaria vesca subsp. vesca]	1.36687	0.000549406	0.00157191	yes	up
MSTRG.62259	PREDICTED: uncharacterized protein LOC101302111 isoform X2 [Fragaria vesca subsp. vesca]	-1.21401	0.0191786	0.0404878	yes	down		augustus_masked-Fvb5-1-processed-gene-280.8	PREDICTED: RNA-binding protein 24 [Fragaria vesca subsp. vesca]	3.5721	1.24698e-10	7.35162e-10	yes	up
augustus_masked-Fvb5-4-processed-gene-101.9	PREDICTED: LRR receptor-like serine/threonine-protein kinase EFR [Fragaria vesca subsp. vesca]	-2.90368	3.72067e-08	1.76909e-07	yes	down		maker-Fvb2-3-snap-gene-76.58	PREDICTED: putative protein TPRXL [Fragaria vesca subsp. vesca]	1.01701	1.52926e-13	1.11587e-12	yes	up
maker-Fvb4-3-augustus-gene-24.59	PREDICTED: uncharacterized protein At4g22758 [Fragaria vesca subsp. vesca]	-1.46849	4.61202e-32	8.04161e-31	yes	down		augustus_masked-Fvb6-3-processed-gene-16.4	putative pentatricopeptide repeat-containing protein At3g01580 [Rosa chinensis]	2.64279	0.0124248	0.0274208	yes	up
maker-Fvb3-2-snap-gene-2.69	PREDICTED: ABC transporter B family member 9 [Fragaria vesca subsp. vesca]	-1.69657	6.22253e-08	2.90284e-07	yes	down		augustus_masked-Fvb3-3-processed-gene-11.2	PREDICTED: ornithine aminotransferase, mitochondrial [Fragaria vesca subsp. vesca]	2.06893	8.77547e-09	4.43187e-08	yes	up
MSTRG.22556	--	-1.20393	3.76904e-67	1.65787e-65	yes	down		maker-Fvb4-2-augustus-gene-15.51	PREDICTED: polygalacturonase At1g48100 [Fragaria vesca subsp. vesca]	1.82405	7.79776e-89	5.16719e-87	yes	up
augustus_masked-Fvb5-4-processed-gene-72.16	PREDICTED: uncharacterized protein At5g50100, mitochondrial [Fragaria vesca subsp. vesca]	-1.38867	5.90965e-06	2.22473e-05	yes	down		maker-Fvb6-1-augustus-gene-168.45	PREDICTED: uncharacterized protein LOC101296120 [Fragaria vesca subsp. vesca]	2.98238	4.49301e-125	5.12715e-123	yes	up
maker-Fvb7-1-augustus-gene-284.62	PREDICTED: protein phosphatase inhibitor 2 [Fragaria vesca subsp. vesca]	-1.08187	7.7783e-17	6.92965e-16	yes	down		maker-Fvb2-2-augustus-gene-138.28	PREDICTED: benzyl alcohol O-benzoyltransferase [Fragaria vesca subsp. vesca]	1.02693	7.83027e-08	3.61599e-07	yes	up
maker-Fvb6-4-augustus-gene-42.39	PREDICTED: histidine-containing phosphotransfer protein 1-like [Fragaria vesca subsp. vesca]	-1.59406	1.31864e-11	8.36033e-11	yes	down		maker-Fvb5-4-snap-gene-79.48	PREDICTED: nudix hydrolase 18, mitochondrial-like [Fragaria vesca subsp. vesca]	1.8647	3.45626e-92	2.42296e-90	yes	up
snap_masked-Fvb1-2-processed-gene-85.44	PREDICTED: gamma carbonic anhydrase 1, mitochondrial [Fragaria vesca subsp. vesca]	-1.02239	2.58045e-35	4.97568e-34	yes	down		augustus_masked-Fvb7-2-processed-gene-256.4	PREDICTED: ethylene-responsive transcription factor ERF105-like [Fragaria vesca subsp. vesca]	3.84506	4.24905e-190	1.03116e-187	yes	up
maker-Fvb2-3-augustus-gene-226.42	PREDICTED: cleavage and polyadenylation specificity factor subunit 6 [Fragaria vesca subsp. vesca]	-2.47902	1.13374e-09	6.1823e-09	yes	down		augustus_masked-Fvb4-1-processed-gene-141.10	Fra a 2 allergen [Fragaria x ananassa]	2.1468	1.00123e-23	1.24378e-22	yes	up
maker-Fvb2-4-augustus-gene-232.53	PREDICTED: cysteine proteinase RD21a [Fragaria vesca subsp. vesca]	-1.35454	5.48641e-106	4.92791e-104	yes	down		maker-Fvb1-4-augustus-gene-45.59	PREDICTED: F-box/LRR-repeat protein At4g14096-like [Fragaria vesca subsp. vesca]	1.19668	7.86339e-09	3.98703e-08	yes	up
maker-Fvb1-3-snap-gene-64.49	flavanone 3-hydroxylase [Fragaria x ananassa]	-3.04475	1.5939e-42	3.8579e-41	yes	down		MSTRG.37388	PREDICTED: 12-oxophytodienoate reductase 1-like, partial [Fragaria vesca subsp. vesca]	2.82637	8.82843e-06	3.2587e-05	yes	up
maker-Fvb2-3-augustus-gene-50.60	PREDICTED: dehydration-responsive protein RD22 [Fragaria vesca subsp. vesca]	-1.20331	1.38136e-52	4.37207e-51	yes	down		maker-Fvb6-1-snap-gene-222.44	PREDICTED: putative deoxyribonuclease TATDN1 [Fragaria vesca subsp. vesca]	1.07884	7.52666e-05	0.000246185	yes	up
MSTRG.15309	PREDICTED: dehydrogenase/reductase SDR family member 12 [Fragaria vesca subsp. vesca]	-1.09258	1.9222e-27	2.80229e-26	yes	down		maker-Fvb2-3-snap-gene-232.58	PREDICTED: disease resistance protein RPM1-like [Fragaria vesca subsp. vesca]	1.05855	0.00244914	0.00625502	yes	up
maker-Fvb5-1-augustus-gene-36.55	PREDICTED: RING-H2 finger protein ATL48 [Fragaria vesca subsp. vesca]	-1.67402	5.91456e-17	5.30523e-16	yes	down		augustus_masked-Fvb4-3-processed-gene-126.12	PREDICTED: centromere/kinetochore protein zw10 homolog isoform X1 [Fragaria vesca subsp. vesca]	1.01163	9.87139e-16	8.25467e-15	yes	up
augustus_masked-Fvb4-3-processed-gene-52.6	PREDICTED: uncharacterized protein LOC105351827 [Fragaria vesca subsp. vesca]	-1.00635	0.000705521	0.00198231	yes	down		maker-Fvb3-3-augustus-gene-19.41	PREDICTED: GDSL esterase/lipase At1g29670-like [Fragaria vesca subsp. vesca]	1.43068	3.46145e-48	9.78398e-47	yes	up
maker-Fvb5-3-augustus-gene-159.33	PREDICTED: beta-amylase 3, chloroplastic [Fragaria vesca subsp. vesca]	-4.6864	0	0	yes	down		maker-Fvb3-3-augustus-gene-255.28	PREDICTED: probable protein phosphatase 2C 25 [Fragaria vesca subsp. vesca]	2.5167	2.68315e-40	6.06949e-39	yes	up
maker-Fvb6-1-augustus-gene-154.43	PREDICTED: DCC family protein At1g52590, chloroplastic isoform X1 [Fragaria vesca subsp. vesca]	-2.15892	1.48857e-148	2.30105e-146	yes	down		maker-Fvb5-1-augustus-gene-197.43	uncharacterized protein LOC110746202 [Prunus avium]	2.15685	2.16246e-08	1.05113e-07	yes	up
maker-Fvb6-4-snap-gene-39.59	PREDICTED: anthocyanidin 3-O-glucoside 2&apos;&apos;-O-glucosyltransferase-like [Fragaria vesca subsp. vesca]	-2.32851	9.42253e-108	8.64916e-106	yes	down		MSTRG.52512	PREDICTED: ankyrin repeat-containing protein At3g12360-like [Fragaria vesca subsp. vesca]	1.37069	0.0204397	0.0428384	yes	up
augustus_masked-Fvb2-3-processed-gene-199.3	RecName: Full=Cinnamate beta-D-glucosyltransferase; AltName: Full=UDP-glucose:cinnamate glucosyltransferase; Short=FaGT2	-1.83458	6.30757e-101	5.15226e-99	yes	down		maker-Fvb3-2-snap-gene-81.54	G-type lectin S-receptor-like serine/threonine-protein kinase At1g67520 [Rosa chinensis]	2.69078	7.58299e-231	2.93048e-228	yes	up
augustus_masked-Fvb7-3-processed-gene-33.8	PREDICTED: uncharacterized protein LOC101298945 [Fragaria vesca subsp. vesca]	-7.64724	7.76156e-24	9.69152e-23	yes	down		augustus_masked-Fvb6-4-processed-gene-215.8	PREDICTED: probable WRKY transcription factor 40 [Fragaria vesca subsp. vesca]	1.48654	2.0845e-09	1.11196e-08	yes	up
maker-Fvb7-3-snap-gene-118.56	PREDICTED: transcription factor EGL1 [Fragaria vesca subsp. vesca]	-1.01639	2.69805e-10	1.54691e-09	yes	down		augustus_masked-Fvb2-3-processed-gene-6.3	PREDICTED: pentatricopeptide repeat-containing protein At5g24830 [Fragaria vesca subsp. vesca]	1.03204	1.03125e-07	4.70254e-07	yes	up
maker-Fvb5-2-augustus-gene-93.30	PREDICTED: uncharacterized protein LOC101301397 [Fragaria vesca subsp. vesca]	-1.27509	3.07986e-41	7.16422e-40	yes	down		MSTRG.44272	PREDICTED: beta carbonic anhydrase 5, chloroplastic-like isoform X3 [Fragaria vesca subsp. vesca]	1.8657	1.04192e-102	8.79192e-101	yes	up
maker-Fvb7-2-snap-gene-299.49	probable LRR receptor-like serine/threonine-protein kinase At1g51880 [Rosa chinensis]	-3.01859	1.37878e-75	7.0846e-74	yes	down		augustus_masked-Fvb4-4-processed-gene-38.9	PREDICTED: uncharacterized protein LOC105351132 [Fragaria vesca subsp. vesca]	1.95923	5.76113e-10	3.21689e-09	yes	up
maker-Fvb3-3-augustus-gene-235.26	PREDICTED: outer envelope pore protein 16, chloroplastic [Fragaria vesca subsp. vesca]	-1.2872	5.77795e-91	3.98973e-89	yes	down		augustus_masked-Fvb7-1-processed-gene-234.5	PREDICTED: uncharacterized protein LOC105352886 [Fragaria vesca subsp. vesca]	2.27169	1.20914e-10	7.13493e-10	yes	up
maker-Fvb6-3-snap-gene-18.75	PREDICTED: cysteine-rich receptor-like protein kinase 42 [Fragaria vesca subsp. vesca]	-3.08197	4.73606e-13	3.33311e-12	yes	down		maker-Fvb3-4-augustus-gene-44.48	PREDICTED: probable inactive receptor-like protein kinase At3g56050 [Fragaria vesca subsp. vesca]	1.62044	5.35561e-29	8.33623e-28	yes	up
maker-Fvb6-4-snap-gene-36.64	PREDICTED: GDP-mannose 3,5-epimerase 2 [Fragaria vesca subsp. vesca]	-1.85907	3.91624e-153	6.49009e-151	yes	down		maker-Fvb7-2-augustus-gene-141.49	PREDICTED: exosome complex exonuclease RRP44 [Fragaria vesca subsp. vesca]	2.42803	6.50141e-08	3.02404e-07	yes	up
maker-Fvb5-4-augustus-gene-169.36	PREDICTED: stromal 70 kDa heat shock-related protein, chloroplastic [Fragaria vesca subsp. vesca]	-1.48539	7.03053e-131	8.64492e-129	yes	down		augustus_masked-Fvb6-4-processed-gene-70.7	PREDICTED: CBL-interacting serine/threonine-protein kinase 14-like [Fragaria vesca subsp. vesca]	1.29039	3.04579e-13	2.17516e-12	yes	up
maker-Fvb5-2-augustus-gene-160.20	PREDICTED: catalase isozyme 1 [Fragaria vesca subsp. vesca]	-1.09374	3.50583e-70	1.64349e-68	yes	down		maker-Fvb4-1-augustus-gene-73.11	PREDICTED: uncharacterized protein LOC101303311 [Fragaria vesca subsp. vesca]	1.38015	0.00472559	0.0114007	yes	up
MSTRG.10633	proline-rich receptor-like protein kinase PERK2 [Prunus avium]	-1.71785	5.79837e-29	9.01016e-28	yes	down		maker-Fvb4-3-snap-gene-290.71	PREDICTED: protein NRT1/ PTR FAMILY 5.2-like [Fragaria vesca subsp. vesca]	1.37621	3.53555e-11	2.1721e-10	yes	up
augustus_masked-Fvb1-2-processed-gene-162.3	PREDICTED: 2-isopropylmalate synthase 2, chloroplastic-like [Fragaria vesca subsp. vesca]	-1.01125	2.04298e-40	4.63277e-39	yes	down		maker-Fvb4-2-snap-gene-96.43	PREDICTED: DAZ-associated protein 1-like [Fragaria vesca subsp. vesca]	1.10652	0.00032747	0.000971718	yes	up
maker-Fvb6-4-snap-gene-81.54	PREDICTED: GDSL esterase/lipase CPRD49-like [Fragaria vesca subsp. vesca]	-1.11834	6.71977e-14	5.01833e-13	yes	down		maker-Fvb1-1-augustus-gene-184.29	PREDICTED: 30S ribosomal protein S6 alpha, chloroplastic [Fragaria vesca subsp. vesca]	1.20198	0.0106039	0.0237635	yes	up
maker-Fvb5-1-augustus-gene-2.39	PREDICTED: bifunctional dTDP-4-dehydrorhamnose 3,5-epimerase/dTDP-4-dehydrorhamnose reductase [Fragaria vesca subsp. vesca]	-1.69205	1.9485e-84	1.2101e-82	yes	down		maker-Fvb2-1-augustus-gene-262.36	PREDICTED: probable WRKY transcription factor 40 isoform X1 [Fragaria vesca subsp. vesca]	2.78946	0.000898698	0.00248031	yes	up
maker-Fvb3-2-snap-gene-266.40	PREDICTED: uncharacterized protein LOC101293077 isoform X1 [Fragaria vesca subsp. vesca]	-1.74756	1.83081e-108	1.71128e-106	yes	down		maker-Fvb4-2-snap-gene-7.64	PREDICTED: uncharacterized protein LOC101302505 isoform X4 [Fragaria vesca subsp. vesca]	1.39487	7.78859e-30	1.25877e-28	yes	up
maker-Fvb5-2-augustus-gene-101.55	PREDICTED: uncharacterized protein LOC101299089 isoform X2 [Fragaria vesca subsp. vesca]	-1.28912	1.06394e-90	7.31364e-89	yes	down		maker-Fvb4-3-augustus-gene-113.54	PREDICTED: stAR-related lipid transfer protein 7, mitochondrial-like isoform X1 [Fragaria vesca subsp. vesca]	1.04075	0.017268	0.0368528	yes	up
maker-Fvb3-1-augustus-gene-138.42	PREDICTED: uncharacterized protein LOC101311553 [Fragaria vesca subsp. vesca]	-1.25557	9.81596e-15	7.72048e-14	yes	down		maker-Fvb4-4-snap-gene-51.66	PREDICTED: uncharacterized protein LOC101293399 [Fragaria vesca subsp. vesca]	1.07889	3.37952e-13	2.40454e-12	yes	up
maker-Fvb2-1-snap-gene-249.59	PREDICTED: thaumatin-like protein 1b [Fragaria vesca subsp. vesca]	-2.54929	3.14622e-83	1.89755e-81	yes	down		augustus_masked-Fvb5-4-processed-gene-80.13	PREDICTED: U-box domain-containing protein 21-like [Fragaria vesca subsp. vesca]	3.47744	3.6227e-09	1.89438e-08	yes	up
maker-Fvb3-3-augustus-gene-290.48	PREDICTED: probable acyl-activating enzyme 18, peroxisomal [Fragaria vesca subsp. vesca]	-1.48729	5.84596e-66	2.5032e-64	yes	down		maker-Fvb1-3-augustus-gene-12.37	PREDICTED: ubiquitin carboxyl-terminal hydrolase 22-like [Fragaria vesca subsp. vesca]	1.2154	1.09448e-11	6.98005e-11	yes	up
maker-Fvb7-3-snap-gene-163.27	PREDICTED: protein ECERIFERUM 1-like [Fragaria vesca subsp. vesca]	-2.18031	0.00848398	0.0194255	yes	down		MSTRG.12778	PREDICTED: enhancer of rudimentary homolog [Fragaria vesca subsp. vesca]	1.92252	0.0001411	0.000442671	yes	up
augustus_masked-Fvb4-2-processed-gene-218.4	PREDICTED: uncharacterized protein LOC101294168 [Fragaria vesca subsp. vesca]	-1.45245	1.27674e-37	2.6454e-36	yes	down		maker-Fvb3-4-augustus-gene-227.30	--	2.87815	2.19862e-29	3.48656e-28	yes	up
maker-Fvb6-2-augustus-gene-308.50	PREDICTED: chorismate mutase 1, chloroplastic [Fragaria vesca subsp. vesca]	-1.06186	1.325e-22	1.57311e-21	yes	down		snap_masked-Fvb7-1-processed-gene-261.40	PREDICTED: RING-H2 finger protein ATL66 [Fragaria vesca subsp. vesca]	5.25386	3.59467e-07	1.55354e-06	yes	up
augustus_masked-Fvb4-3-processed-gene-58.13	PREDICTED: MATE efflux family protein 7-like isoform X1 [Fragaria vesca subsp. vesca]	-3.22118	0.0130055	0.0285631	yes	down		MSTRG.448	PREDICTED: probable CCR4-associated factor 1 homolog 11 [Fragaria vesca subsp. vesca]	1.50333	3.416e-17	3.10495e-16	yes	up
maker-Fvb3-2-augustus-gene-239.27	PREDICTED: probable serine/threonine-protein kinase RLCKVII [Fragaria vesca subsp. vesca]	-1.03039	9.21821e-22	1.0518e-20	yes	down		maker-Fvb3-4-augustus-gene-29.42	PREDICTED: root phototropism protein 2 [Fragaria vesca subsp. vesca]	4.17526	6.11586e-171	1.24726e-168	yes	up
maker-Fvb7-4-snap-gene-80.49	PREDICTED: chorismate synthase, chloroplastic isoform X1 [Fragaria vesca subsp. vesca]	-1.3026	1.9714e-48	5.60498e-47	yes	down		MSTRG.51189	PREDICTED: vegetative cell wall protein gp1-like [Fragaria vesca subsp. vesca]	1.55755	7.98194e-06	2.95943e-05	yes	up
augustus_masked-Fvb5-3-processed-gene-247.13	PREDICTED: U-box domain-containing protein 19-like [Fragaria vesca subsp. vesca]	-3.73121	4.21331e-06	1.61495e-05	yes	down		maker-Fvb5-2-augustus-gene-22.36	PREDICTED: E3 ubiquitin-protein ligase SINAT5-like [Fragaria vesca subsp. vesca]	5.70361	9.58876e-05	0.000308866	yes	up
maker-Fvb3-1-snap-gene-21.77	PREDICTED: DNA-directed RNA polymerases I and III subunit RPAC1 isoform X1 [Fragaria vesca subsp. vesca]	-1.38404	2.45424e-16	2.12133e-15	yes	down		augustus_masked-Fvb5-1-processed-gene-295.11	PREDICTED: uncharacterized protein LOC101306050 [Fragaria vesca subsp. vesca]	4.59148	2.26064e-16	1.9593e-15	yes	up
maker-Fvb1-2-augustus-gene-257.26	PREDICTED: uncharacterized protein LOC101292166 [Fragaria vesca subsp. vesca]	-1.25828	0.00311443	0.0077991	yes	down		augustus_masked-Fvb3-4-processed-gene-4.8	PREDICTED: uncharacterized protein LOC101314833 [Fragaria vesca subsp. vesca]	1.35262	7.90396e-22	9.04198e-21	yes	up
MSTRG.47218	heme-binding-like protein At3g10130, chloroplastic [Rosa chinensis]	-2.53084	1.34185e-227	5.01699e-225	yes	down		maker-Fvb7-2-augustus-gene-246.67	PREDICTED: transcription factor SCREAM2 isoform X1 [Fragaria vesca subsp. vesca]	7.11426	5.45924e-11	3.30777e-10	yes	up
maker-Fvb3-1-augustus-gene-268.19	PREDICTED: ABC transporter C family member 12-like [Fragaria vesca subsp. vesca]	-1.95865	2.97007e-69	1.36724e-67	yes	down		maker-Fvb5-3-augustus-gene-7.36	PREDICTED: E3 ubiquitin-protein ligase MARCH2-like [Fragaria vesca subsp. vesca]	2.15686	2.09064e-22	2.46051e-21	yes	up
maker-Fvb1-4-augustus-gene-146.22	PREDICTED: uncharacterized protein LOC101314134 [Fragaria vesca subsp. vesca]	-1.29543	1.63967e-44	4.18919e-43	yes	down		augustus_masked-Fvb6-3-processed-gene-303.13	PREDICTED: protein NUCLEAR FUSION DEFECTIVE 4-like [Fragaria vesca subsp. vesca]	2.04955	0.00012984	0.00040944	yes	up
snap_masked-Fvb5-3-processed-gene-168.16	PREDICTED: probable phosphoribosylformylglycinamidine synthase, chloroplastic/mitochondrial [Fragaria vesca subsp. vesca]	-1.03471	4.23696e-28	6.34999e-27	yes	down		maker-Fvb6-3-augustus-gene-258.18	PREDICTED: NAC domain-containing protein 90-like [Fragaria vesca subsp. vesca]	2.00573	2.62977e-08	1.26895e-07	yes	up
snap_masked-Fvb5-2-processed-gene-15.27	phosphoglycerate mutase-like protein AT74H isoform X2 [Rosa chinensis]	-1.20893	1.35507e-47	3.76993e-46	yes	down		maker-Fvb2-2-snap-gene-154.38	PREDICTED: auxin-induced protein 15A-like [Fragaria vesca subsp. vesca]	1.79466	9.82891e-17	8.70509e-16	yes	up
maker-Fvb6-2-augustus-gene-239.65	PREDICTED: root phototropism protein 3-like [Fragaria vesca subsp. vesca]	-3.47994	1.26107e-15	1.04844e-14	yes	down		MSTRG.44349	putative phosphate-induced protein [Rosa chinensis]	4.09463	9.45476e-07	3.89733e-06	yes	up
MSTRG.55315	PREDICTED: ATP-dependent Clp protease proteolytic subunit-related protein 3, chloroplastic [Fragaria vesca subsp. vesca]	-1.50686	2.15159e-102	1.80396e-100	yes	down		maker-Fvb1-2-augustus-gene-42.40	L-ascorbate oxidase homolog [Rosa chinensis]	1.10533	1.60756e-20	1.7271e-19	yes	up
maker-Fvb5-1-augustus-gene-69.64	PREDICTED: succinate dehydrogenase assembly factor 2, mitochondrial [Fragaria vesca subsp. vesca]	-1.39449	2.399e-20	2.55353e-19	yes	down		maker-Fvb3-3-augustus-gene-263.41	PREDICTED: expansin-A4-like [Fragaria vesca subsp. vesca]	2.10028	2.97243e-126	3.42597e-124	yes	up
maker-Fvb2-4-augustus-gene-126.33	PREDICTED: uncharacterized protein ycf39 [Fragaria vesca subsp. vesca]	-1.38231	1.37709e-70	6.49203e-69	yes	down		maker-Fvb1-1-snap-gene-19.30	uncharacterized protein LOC110746345 [Prunus avium]	2.04449	0.0166598	0.0356923	yes	up
maker-Fvb6-4-snap-gene-327.66	PREDICTED: stress-induced protein KIN2-like [Fragaria vesca subsp. vesca]	-1.22658	2.9153e-16	2.51112e-15	yes	down		augustus_masked-Fvb6-2-processed-gene-292.4	PREDICTED: RING-H2 finger protein ATL46 [Fragaria vesca subsp. vesca]	1.14762	0.00306858	0.00769369	yes	up
augustus_masked-Fvb1-1-processed-gene-253.1	PREDICTED: kinesin-13A-like [Fragaria vesca subsp. vesca]	-1.295	5.70268e-16	4.8333e-15	yes	down		maker-Fvb4-1-augustus-gene-115.33	PREDICTED: stem-specific protein TSJT1 isoform X2 [Fragaria vesca subsp. vesca]	1.22538	3.23026e-52	1.01644e-50	yes	up
maker-Fvb2-3-snap-gene-216.49	PREDICTED: serine carboxypeptidase-like 7 [Fragaria vesca subsp. vesca]	-1.51441	1.29666e-46	3.51701e-45	yes	down		MSTRG.14914	--	4.05555	9.30193e-35	1.75642e-33	yes	up
maker-Fvb5-4-snap-gene-33.74	PREDICTED: pentatricopeptide repeat-containing protein At4g19440, chloroplastic-like [Fragaria vesca subsp. vesca]	-3.20601	5.59973e-25	7.33781e-24	yes	down		snap_masked-Fvb6-4-processed-gene-138.21	PREDICTED: lysosomal Pro-X carboxypeptidase-like [Fragaria vesca subsp. vesca]	1.0395	0.000821574	0.00228342	yes	up
maker-Fvb4-3-augustus-gene-106.42	PREDICTED: photosynthetic NDH subunit of lumenal location 5, chloroplastic [Fragaria vesca subsp. vesca]	-1.44552	3.67018e-102	3.06324e-100	yes	down		maker-Fvb6-1-augustus-gene-170.32	PREDICTED: short-chain dehydrogenase TIC 32, chloroplastic-like [Fragaria vesca subsp. vesca]	1.29412	9.83296e-10	5.39358e-09	yes	up
maker-Fvb4-2-snap-gene-36.68	PREDICTED: fructokinase-like 2, chloroplastic [Fragaria vesca subsp. vesca]	-1.03845	0.00115713	0.00313199	yes	down		maker-Fvb4-1-augustus-gene-136.42	PREDICTED: small heat shock protein, chloroplastic-like [Fragaria vesca subsp. vesca]	2.0748	5.49775e-13	3.85031e-12	yes	up
maker-Fvb1-1-augustus-gene-164.37	PREDICTED: probable mannitol dehydrogenase [Fragaria vesca subsp. vesca]	-4.34721	3.84213e-82	2.25372e-80	yes	down		snap_masked-Fvb7-3-processed-gene-55.46	PREDICTED: protein NRT1/ PTR FAMILY 5.1 [Fragaria vesca subsp. vesca]	1.8736	3.18769e-24	4.04458e-23	yes	up
maker-Fvb7-4-snap-gene-70.27	PREDICTED: uncharacterized protein LOC105353024 [Fragaria vesca subsp. vesca]	-2.72877	1.76277e-16	1.53592e-15	yes	down		MSTRG.61449	PREDICTED: exosome complex exonuclease RRP44 [Fragaria vesca subsp. vesca]	2.42803	6.50141e-08	3.02404e-07	yes	up
maker-Fvb5-2-augustus-gene-205.12	PREDICTED: protein NRT1/ PTR FAMILY 5.10-like [Fragaria vesca subsp. vesca]	-1.75747	6.63866e-81	3.76912e-79	yes	down		maker-Fvb1-4-augustus-gene-186.20	PREDICTED: histone-lysine N-methyltransferase ASHH3-like [Fragaria vesca subsp. vesca]	1.88998	6.44851e-05	0.000213111	yes	up
maker-Fvb2-4-augustus-gene-46.31	PREDICTED: very-long-chain enoyl-CoA reductase-like [Fragaria vesca subsp. vesca]	-1.42778	0.000526795	0.00151187	yes	down		augustus_masked-Fvb2-3-processed-gene-209.1	PREDICTED: uncharacterized protein LOC105349590 [Fragaria vesca subsp. vesca]	2.77821	1.00598e-13	7.42466e-13	yes	up
maker-Fvb4-4-snap-gene-113.29	PREDICTED: sodium/hydrogen exchanger 2-like [Fragaria vesca subsp. vesca]	-3.75247	1.17876e-221	4.16992e-219	yes	down		maker-Fvb2-2-augustus-gene-5.46	PREDICTED: aspartic proteinase-like protein 2 isoform X1 [Fragaria vesca subsp. vesca]	1.60994	9.18759e-125	1.04069e-122	yes	up
maker-Fvb7-2-snap-gene-118.68	PREDICTED: somatic embryogenesis receptor kinase 1-like [Fragaria vesca subsp. vesca]	-1.26478	3.28104e-06	1.27537e-05	yes	down		maker-Fvb7-2-augustus-gene-29.40	PREDICTED: probable aquaporin TIP1-2 [Fragaria vesca subsp. vesca]	1.64583	3.42899e-08	1.63624e-07	yes	up
augustus_masked-Fvb2-4-processed-gene-197.0	PREDICTED: IAA-amino acid hydrolase ILR1-like 6 [Fragaria vesca subsp. vesca]	-1.44278	9.57312e-19	9.4191e-18	yes	down		augustus_masked-Fvb6-1-processed-gene-1.7	hypothetical protein RchiOBHm_Chr2g0169181 [Rosa chinensis]	1.14641	0.022065	0.0458178	yes	up
maker-Fvb5-4-snap-gene-206.53	PREDICTED: palmitoyl-monogalactosyldiacylglycerol delta-7 desaturase, chloroplastic-like [Fragaria vesca subsp. vesca]	-2.66009	0.000103411	0.000331139	yes	down		MSTRG.421	putative RNA-directed DNA polymerase [Rosa chinensis]	1.08919	0.00555785	0.0132299	yes	up
maker-Fvb5-1-snap-gene-241.40	PREDICTED: protein NRT1/ PTR FAMILY 5.10-like [Fragaria vesca subsp. vesca]	-1.25485	3.74003e-48	1.05649e-46	yes	down		snap_masked-Fvb1-4-processed-gene-81.22	PREDICTED: mitogen-activated protein kinase kinase kinase NPK1 [Fragaria vesca subsp. vesca]	1.2489	1.01153e-42	2.46388e-41	yes	up
augustus_masked-Fvb5-3-processed-gene-67.8	PREDICTED: multiple C2 and transmembrane domain-containing protein 2 [Fragaria vesca subsp. vesca]	-1.01481	5.80768e-19	5.77727e-18	yes	down		MSTRG.9031	PREDICTED: serine/threonine-protein kinase 19 isoform X1 [Fragaria vesca subsp. vesca]	1.06817	1.31052e-10	7.70941e-10	yes	up
maker-Fvb3-1-snap-gene-263.72	PREDICTED: fatty acid 2-hydroxylase 1-like [Fragaria vesca subsp. vesca]	-1.16386	1.48863e-38	3.18046e-37	yes	down		maker-Fvb6-3-augustus-gene-86.49	PREDICTED: 1-aminocyclopropane-1-carboxylate oxidase [Fragaria vesca subsp. vesca]	1.12452	5.27084e-53	1.68155e-51	yes	up
maker-Fvb4-4-augustus-gene-37.66	PREDICTED: ninja-family protein AFP2-like [Fragaria vesca subsp. vesca]	-2.59858	5.90374e-43	1.44955e-41	yes	down		maker-Fvb1-1-augustus-gene-216.47	PREDICTED: histone H1 [Fragaria vesca subsp. vesca]	1.00533	2.498e-36	4.9817e-35	yes	up
MSTRG.26808	pleiotropic drug resistance protein 1-like isoform X1 [Rosa chinensis]	-1.53462	3.33062e-35	6.39401e-34	yes	down		augustus_masked-Fvb5-3-processed-gene-161.6	PREDICTED: flavonol synthase 3-like [Fragaria vesca subsp. vesca]	1.38533	2.01182e-09	1.07445e-08	yes	up
maker-Fvb6-2-snap-gene-269.70	PREDICTED: uncharacterized protein LOC101307034 [Fragaria vesca subsp. vesca]	-1.37531	2.41056e-78	1.30728e-76	yes	down		snap_masked-Fvb4-4-processed-gene-15.47	PREDICTED: probable xyloglucan endotransglucosylase/hydrolase protein 33 [Fragaria vesca subsp. vesca]	5.01256	1.20056e-55	4.10644e-54	yes	up
maker-Fvb2-2-augustus-gene-18.50	PREDICTED: putative RNA methyltransferase At5g10620 isoform X1 [Fragaria vesca subsp. vesca]	-1.19801	6.63308e-43	1.6223e-41	yes	down		snap_masked-Fvb7-3-processed-gene-248.12	PREDICTED: E3 ubiquitin-protein ligase RING1-like isoform X2 [Fragaria vesca subsp. vesca]	2.72543	1.45565e-23	1.79446e-22	yes	up
maker-Fvb5-1-augustus-gene-83.42	putative peptidase S49, protease IV, peptidase S49, SppA, ClpP/crotonase-like protein [Rosa chinensis]	-2.05895	5.04489e-185	1.16002e-182	yes	down		augustus_masked-Fvb5-1-processed-gene-202.4	PREDICTED: UDP-N-acetylglucosamine transferase subunit ALG13 homolog [Fragaria vesca subsp. vesca]	2.5419	9.18826e-39	1.97777e-37	yes	up
maker-Fvb1-2-augustus-gene-145.18	PREDICTED: uncharacterized protein LOC101303450 [Fragaria vesca subsp. vesca]	-2.09735	8.33727e-85	5.21652e-83	yes	down		maker-Fvb6-1-augustus-gene-142.33	PREDICTED: uncharacterized protein LOC101294092 isoform X2 [Fragaria vesca subsp. vesca]	1.40848	1.35933e-05	4.89896e-05	yes	up
maker-Fvb5-4-augustus-gene-111.20	PREDICTED: protein LOL1 [Fragaria vesca subsp. vesca]	-1.05991	7.14294e-34	1.31475e-32	yes	down		augustus_masked-Fvb3-4-processed-gene-49.2	PREDICTED: 18.1 kDa class I heat shock protein-like [Fragaria vesca subsp. vesca]	1.69005	9.58312e-47	2.60929e-45	yes	up
maker-Fvb2-3-augustus-gene-16.36	PREDICTED: DIS3-like exonuclease 2 [Fragaria vesca subsp. vesca]	-1.59529	6.39283e-30	1.03537e-28	yes	down		maker-Fvb1-2-augustus-gene-119.38	PREDICTED: 1-aminocyclopropane-1-carboxylate synthase [Fragaria vesca subsp. vesca]	5.86955	5.33272e-07	2.26008e-06	yes	up
maker-Fvb5-2-augustus-gene-183.28	PREDICTED: MLO-like protein 4 [Fragaria vesca subsp. vesca]	-1.01945	1.16481e-31	2.00739e-30	yes	down		maker-Fvb5-3-augustus-gene-11.50	PREDICTED: cyclin-T1-3-like [Fragaria vesca subsp. vesca]	1.08218	1.29919e-05	4.69304e-05	yes	up
maker-Fvb7-1-augustus-gene-222.40	PREDICTED: expansin-A4-like [Fragaria vesca subsp. vesca]	-3.05694	5.64009e-06	2.12857e-05	yes	down		maker-Fvb6-2-augustus-gene-89.28	PREDICTED: proline-rich protein 2-like [Fragaria vesca subsp. vesca]	2.23165	1.47368e-10	8.63443e-10	yes	up
maker-Fvb6-2-snap-gene-244.57	PREDICTED: uncharacterized protein LOC101309953 isoform X1 [Fragaria vesca subsp. vesca]	-1.06442	2.93216e-12	1.9489e-11	yes	down		MSTRG.16468	--	1.28588	1.89568e-58	6.95481e-57	yes	up
maker-Fvb2-3-augustus-gene-58.42	PREDICTED: protein DCL, chloroplastic [Fragaria vesca subsp. vesca]	-1.16121	2.33591e-19	2.37479e-18	yes	down		maker-Fvb4-2-augustus-gene-76.50	PREDICTED: cell death-inducing p53-target protein 1 homolog [Fragaria vesca subsp. vesca]	1.00395	3.37173e-05	0.000115509	yes	up
maker-Fvb6-4-snap-gene-288.44	phytoene synthase protein [Fragaria x ananassa]	-1.46385	2.22683e-96	1.67059e-94	yes	down		augustus_masked-Fvb5-4-processed-gene-250.14	PREDICTED: uncharacterized protein LOC101306050 [Fragaria vesca subsp. vesca]	3.6737	0.00023549	0.000714737	yes	up
maker-Fvb5-3-augustus-gene-164.43	PREDICTED: uncharacterized protein LOC101299593 [Fragaria vesca subsp. vesca]	-1.52598	2.01768e-09	1.07739e-08	yes	down		maker-Fvb6-2-snap-gene-301.38	uncharacterized protein LOC112166156 isoform X2 [Rosa chinensis]	1.9569	0.000565963	0.00161561	yes	up
maker-Fvb7-1-snap-gene-184.41	PREDICTED: protein SdownPRESSOR OF PHYA-105 1 [Fragaria vesca subsp. vesca]	-2.02882	1.09289e-78	5.9707e-77	yes	down		maker-Fvb5-1-augustus-gene-103.58	PREDICTED: uncharacterized protein LOC101292121 [Fragaria vesca subsp. vesca]	1.31041	0.00443154	0.0107525	yes	up
maker-Fvb2-1-augustus-gene-140.35	PREDICTED: inorganic phosphate transporter 1-4-like [Fragaria vesca subsp. vesca]	-1.47043	2.15267e-22	2.53254e-21	yes	down		maker-Fvb7-2-augustus-gene-67.21	PREDICTED: protein NRT1/ PTR FAMILY 7.2-like [Fragaria vesca subsp. vesca]	2.71114	1.33078e-21	1.50591e-20	yes	up
MSTRG.23762	PREDICTED: nuclear pore complex protein Ndown62 [Fragaria vesca subsp. vesca]	-1.78145	5.73399e-21	6.30793e-20	yes	down		maker-Fvb2-1-augustus-gene-117.34	PREDICTED: kinesin-related protein 11 isoform X2 [Fragaria vesca subsp. vesca]	1.56904	2.63642e-74	1.31287e-72	yes	up
maker-Fvb7-2-augustus-gene-145.38	PREDICTED: ATPase GET3 [Fragaria vesca subsp. vesca]	-1.05499	3.42258e-18	3.2706e-17	yes	down		maker-Fvb6-2-snap-gene-75.71	PREDICTED: F-box/kelch-repeat protein At3g23880-like [Fragaria vesca subsp. vesca]	1.96321	2.41846e-38	5.13007e-37	yes	up
maker-Fvb7-3-augustus-gene-146.33	PREDICTED: uncharacterized protein LOC101311511 isoform X1 [Fragaria vesca subsp. vesca]	-2.02	1.99243e-101	1.64207e-99	yes	down		maker-Fvb6-4-augustus-gene-283.35	PREDICTED: probable LRR receptor-like serine/threonine-protein kinase At1g07650 isoform X1 [Fragaria vesca subsp. vesca]	1.09642	5.47497e-45	1.41889e-43	yes	up
MSTRG.59853	PREDICTED: short-chain dehydrogenase TIC 32, chloroplastic-like isoform X2 [Fragaria vesca subsp. vesca]	-1.54136	8.73831e-21	9.52269e-20	yes	down		snap_masked-Fvb7-2-processed-gene-272.23	PREDICTED: LOW QUALITY PROTEIN: MATE efflux family protein 5 [Fragaria vesca subsp. vesca]	2.39333	0.0219721	0.0456443	yes	up
maker-Fvb7-1-augustus-gene-286.65	PREDICTED: low-temperature-induced 65 kDa protein isoform X3 [Fragaria vesca subsp. vesca]	-6.47271	3.56538e-26	4.9372e-25	yes	down		MSTRG.31535	PREDICTED: proline-rich protein 4 [Prunus mume]	1.43969	8.46965e-67	3.70073e-65	yes	up
maker-Fvb6-1-augustus-gene-254.43	PREDICTED: pentatricopeptide repeat-containing protein At2g32630 [Fragaria vesca subsp. vesca]	-1.2847	8.85001e-67	3.86509e-65	yes	down		maker-Fvb1-2-augustus-gene-95.40	PREDICTED: probable esterase PIR7A isoform X1 [Fragaria vesca subsp. vesca]	1.06961	0.000817681	0.00227294	yes	up
maker-Fvb5-3-augustus-gene-254.34	PREDICTED: GDT1-like protein 1, chloroplastic [Fragaria vesca subsp. vesca]	-1.15526	1.73019e-52	5.46295e-51	yes	down		maker-Fvb6-3-augustus-gene-267.38	PREDICTED: uncharacterized protein LOC101314767 [Fragaria vesca subsp. vesca]	1.19419	7.12403e-07	2.97606e-06	yes	up
maker-Fvb6-3-augustus-gene-125.38	PREDICTED: protein EARLY FLOWERING 3 [Fragaria vesca subsp. vesca]	-1.63657	0.0189468	0.0400573	yes	down		maker-Fvb5-3-snap-gene-225.57	PREDICTED: uncharacterized protein LOC101301684 isoform X1 [Fragaria vesca subsp. vesca]	1.55197	6.25268e-08	2.91616e-07	yes	up
maker-Fvb5-2-snap-gene-37.77	PREDICTED: high-affinity nitrate transporter 3.1-like [Fragaria vesca subsp. vesca]	-2.49689	4.52564e-107	4.12129e-105	yes	down		maker-Fvb1-4-snap-gene-86.70	GPI-anchored CFEM domain protein ARB_01545-like isoform X1 [Prunus avium]	2.09015	2.20668e-06	8.73779e-06	yes	up
maker-Fvb1-3-augustus-gene-144.30	R2R3 MYB transcription factor [Fragaria x ananassa]	-2.11552	0.0232124	0.0479222	yes	down		maker-Fvb5-2-augustus-gene-247.23	PREDICTED: E3 ubiquitin-protein ligase MARCH2-like [Fragaria vesca subsp. vesca]	2.82137	1.85245e-47	5.12734e-46	yes	up
maker-Fvb5-1-augustus-gene-185.42	PREDICTED: probable cellulose synthase A catalytic subunit 3 [UDP-forming] [Fragaria vesca subsp. vesca]	-1.05154	4.38436e-66	1.88702e-64	yes	down		MSTRG.64568	tyrosine--tRNA ligase 1, cytoplasmic-like isoform X1 [Rosa chinensis]	2.01302	1.61931e-27	2.36672e-26	yes	up
maker-Fvb3-1-snap-gene-295.33	PREDICTED: protein kinase PINOID [Fragaria vesca subsp. vesca]	-2.23056	4.1637e-05	0.000141079	yes	down		maker-Fvb1-1-augustus-gene-202.48	probable LRR receptor-like serine/threonine-protein kinase At5g48740 [Prunus avium]	1.25951	0.0024276	0.00620327	yes	up
maker-Fvb3-3-augustus-gene-62.28	PREDICTED: YTH domain-containing family protein 2 [Fragaria vesca subsp. vesca]	-1.31833	1.80227e-63	7.38047e-62	yes	down		maker-Fvb7-4-augustus-gene-88.37	PREDICTED: protein ATAF2-like [Fragaria vesca subsp. vesca]	1.10166	0.0116541	0.0258818	yes	up
augustus_masked-Fvb4-3-processed-gene-22.4	PREDICTED: zinc finger protein 7 [Fragaria vesca subsp. vesca]	-1.19841	1.38983e-17	1.28758e-16	yes	down		maker-Fvb4-2-augustus-gene-173.19	PREDICTED: probable xyloglucan endotransglucosylase/hydrolase protein 23 [Fragaria vesca subsp. vesca]	1.9473	4.32377e-05	0.000146191	yes	up
maker-Fvb7-3-augustus-gene-74.55	PREDICTED: ACT domain-containing protein ACR9 [Fragaria vesca subsp. vesca]	-1.13755	8.06176e-47	2.20026e-45	yes	down		maker-Fvb3-2-snap-gene-313.92	PREDICTED: uridine kinase-like protein 3 [Fragaria vesca subsp. vesca]	1.79072	1.49174e-17	1.38046e-16	yes	up
maker-Fvb4-3-augustus-gene-83.62	PREDICTED: uncharacterized protein LOC101305664 [Fragaria vesca subsp. vesca]	-1.33678	2.05177e-29	3.2593e-28	yes	down		augustus_masked-Fvb7-3-processed-gene-82.10	hypothetical protein RchiOBHm_Chr1g0363961 [Rosa chinensis]	2.52196	0.000855273	0.00237063	yes	up
augustus_masked-Fvb3-1-processed-gene-70.0	PREDICTED: calcium-transporting ATPase 4, endoplasmic reticulum-type-like [Fragaria vesca subsp. vesca]	-2.49065	1.13084e-12	7.74921e-12	yes	down		maker-Fvb4-3-augustus-gene-52.49	PREDICTED: zinc finger protein CONSTANS-LIKE 16 [Fragaria vesca subsp. vesca]	3.30108	1.73026e-94	1.26504e-92	yes	up
maker-Fvb2-3-augustus-gene-72.18	PREDICTED: cysteine proteinase inhibitor A [Fragaria vesca subsp. vesca]	-1.61971	1.84028e-14	1.42225e-13	yes	down		maker-Fvb4-1-augustus-gene-55.16	probable pre-mRNA-splicing factor ATP-dependent RNA helicase DEAH5 isoform X2 [Rosa chinensis]	2.06315	0.00770408	0.017815	yes	up
maker-Fvb1-4-augustus-gene-134.32	PREDICTED: probable WRKY transcription factor 13 [Fragaria vesca subsp. vesca]	-1.34281	0.000626584	0.00177484	yes	down		maker-Fvb4-3-augustus-gene-75.27	PREDICTED: extensin-2-like, partial [Fragaria vesca subsp. vesca]	1.39788	7.68683e-06	2.85647e-05	yes	up
maker-Fvb3-3-augustus-gene-235.23	putative Metallothionein, family 15, plant [Rosa chinensis]	-2.42702	7.78136e-16	6.54383e-15	yes	down		maker-Fvb4-2-augustus-gene-78.37	inactive leucine-rich repeat receptor-like protein kinase CORYNE [Rosa chinensis]	2.68871	0	0	yes	up
MSTRG.63192	PREDICTED: low-temperature-induced 65 kDa protein isoform X7 [Fragaria vesca subsp. vesca]	-6.58899	0	0	yes	down		maker-Fvb7-3-augustus-gene-229.46	PREDICTED: F-box/WD-40 repeat-containing protein At3g52030 isoform X1 [Fragaria vesca subsp. vesca]	1.00166	7.26282e-11	4.3541e-10	yes	up
maker-Fvb5-2-augustus-gene-93.31	PREDICTED: uncharacterized protein LOC101294368 [Fragaria vesca subsp. vesca]	-1.56803	3.81677e-09	1.9925e-08	yes	down		maker-Fvb5-1-augustus-gene-180.28	PREDICTED: zinc finger CCCH domain-containing protein 53 isoform X2 [Fragaria vesca subsp. vesca]	1.86554	7.53274e-59	2.79142e-57	yes	up
snap_masked-Fvb3-1-processed-gene-172.9	PREDICTED: uncharacterized protein LOC105350538 [Fragaria vesca subsp. vesca]	-1.284	6.28239e-08	2.92883e-07	yes	down		maker-Fvb5-3-augustus-gene-215.48	PREDICTED: kinesin-like protein NACK1 [Fragaria vesca subsp. vesca]	1.35329	5.8392e-27	8.36031e-26	yes	up
maker-Fvb4-2-augustus-gene-246.46	PREDICTED: uncharacterized protein LOC101303794 [Fragaria vesca subsp. vesca]	-1.28635	1.44112e-74	7.24308e-73	yes	down		maker-Fvb6-3-snap-gene-303.45	PREDICTED: heparan-alpha-glucosaminide N-acetyltransferase-like [Fragaria vesca subsp. vesca]	4.37336	6.19556e-12	4.02545e-11	yes	up
augustus_masked-Fvb5-3-processed-gene-69.4	PREDICTED: protein NRT1/ PTR FAMILY 5.10-like [Fragaria vesca subsp. vesca]	-1.75499	1.23849e-31	2.13277e-30	yes	down		maker-Fvb1-3-snap-gene-213.16	PREDICTED: protein IWS1 homolog A [Fragaria vesca subsp. vesca]	1.58064	0.000446355	0.00129667	yes	up
MSTRG.24249	PREDICTED: putative lysine-specific demethylase JMJD5 [Fragaria vesca subsp. vesca]	-5.48121	0	0	yes	down		MSTRG.10813	PREDICTED: oxysterol-binding protein-related protein 1C-like [Fragaria vesca subsp. vesca]	1.05567	1.31134e-23	1.62003e-22	yes	up
MSTRG.2776	PREDICTED: uncharacterized protein LOC101298930 isoform X2 [Fragaria vesca subsp. vesca]	-1.04599	0.000245992	0.000744599	yes	down		maker-Fvb5-1-augustus-gene-172.38	PREDICTED: probable serine/threonine-protein kinase NAK [Fragaria vesca subsp. vesca]	1.01963	0.00991506	0.0223698	yes	up
MSTRG.35238	PREDICTED: ethylene-responsive transcription factor ERF061 [Fragaria vesca subsp. vesca]	-4.96579	4.58128e-09	2.37404e-08	yes	down		MSTRG.8945	--	1.07142	2.59322e-38	5.49444e-37	yes	up
maker-Fvb7-2-snap-gene-317.65	PREDICTED: S-type anion channel SLAH2-like isoform X1 [Fragaria vesca subsp. vesca]	-2.21675	6.53822e-133	8.2718e-131	yes	down		maker-Fvb3-1-snap-gene-306.49	cysteine-rich receptor-like protein kinase 10 [Rosa chinensis]	1.84291	4.30644e-88	2.82719e-86	yes	up
maker-Fvb2-4-augustus-gene-254.45	PREDICTED: uncharacterized protein LOC101300500 [Fragaria vesca subsp. vesca]	-1.20423	1.81526e-09	9.71888e-09	yes	down		MSTRG.25373	PREDICTED: uncharacterized protein LOC101293181 [Fragaria vesca subsp. vesca]	3.52427	0.00520839	0.0124635	yes	up
maker-Fvb6-2-augustus-gene-349.46	PREDICTED: U-box domain-containing protein 3 isoform X1 [Fragaria vesca subsp. vesca]	-1.06375	4.1409e-42	9.91573e-41	yes	down		maker-Fvb6-4-augustus-gene-213.38	PREDICTED: uncharacterized protein LOC101296120 [Fragaria vesca subsp. vesca]	2.07754	7.19124e-52	2.2368e-50	yes	up
augustus_masked-Fvb1-3-processed-gene-211.7	PREDICTED: FK506-binding protein 3-like [Fragaria vesca subsp. vesca]	-1.62079	0.000152466	0.00047575	yes	down		MSTRG.29507	PREDICTED: uncharacterized protein LOC105353119 [Fragaria vesca subsp. vesca]	5.06799	9.13888e-05	0.00029543	yes	up
maker-Fvb6-2-augustus-gene-176.25	PREDICTED: uncharacterized protein LOC105352514 [Fragaria vesca subsp. vesca]	-1.53716	0.00505895	0.0121302	yes	down		maker-Fvb7-1-augustus-gene-269.48	PREDICTED: uncharacterized protein LOC101312772 [Fragaria vesca subsp. vesca]	1.18659	1.71991e-32	3.04622e-31	yes	up
maker-Fvb7-1-augustus-gene-41.44	PREDICTED: LOW QUALITY PROTEIN: protein ZINC INDUCED FACILITATOR-LIKE 1-like [Fragaria vesca subsp. vesca]	-1.16264	7.69996e-32	1.33549e-30	yes	down		maker-Fvb4-3-augustus-gene-295.44	meiotic recombination protein DMC1 homolog [Rosa chinensis]	2.21773	3.39492e-08	1.62158e-07	yes	up
maker-Fvb6-3-augustus-gene-23.42	PREDICTED: uncharacterized protein LOC101309568 [Fragaria vesca subsp. vesca]	-1.64303	4.20789e-26	5.80421e-25	yes	down		augustus_masked-Fvb2-4-processed-gene-143.6	uncharacterized protein LOC112168803 [Rosa chinensis]	1.73171	5.69365e-13	3.98114e-12	yes	up
maker-Fvb2-4-augustus-gene-35.41	PREDICTED: bZIP transcription factor TRAB1 [Fragaria vesca subsp. vesca]	-1.14681	3.96265e-37	8.11193e-36	yes	down		maker-Fvb3-4-augustus-gene-213.55	PREDICTED: putative serine/threonine-protein kinase [Fragaria vesca subsp. vesca]	1.19281	1.31059e-08	6.49301e-08	yes	up
MSTRG.20933	PREDICTED: uncharacterized protein LOC105349931 [Fragaria vesca subsp. vesca]	-5.31815	3.54849e-242	1.56912e-239	yes	down		MSTRG.21151	PREDICTED: zinc finger CCCH domain-containing protein 48-like [Fragaria vesca subsp. vesca]	1.64551	1.46402e-24	1.88433e-23	yes	up
maker-Fvb5-2-augustus-gene-82.43	PREDICTED: geranylgeranyl diphosphate reductase, chloroplastic [Fragaria vesca subsp. vesca]	-1.20978	1.35734e-53	4.40517e-52	yes	down		maker-Fvb6-2-snap-gene-335.44	PREDICTED: cell differentiation protein rcd1-like isoform X2 [Fragaria vesca subsp. vesca]	2.35866	6.34732e-09	3.24226e-08	yes	up
maker-Fvb2-1-augustus-gene-185.39	PREDICTED: UDP-sugar pyrophosphorylase [Fragaria vesca subsp. vesca]	-1.06238	2.71044e-10	1.55383e-09	yes	down		maker-Fvb7-2-augustus-gene-222.46	PREDICTED: caffeoylshikimate esterase-like [Fragaria vesca subsp. vesca]	1.35105	3.23322e-34	6.00887e-33	yes	up
maker-Fvb7-4-snap-gene-21.81	PREDICTED: short-chain dehydrogenase TIC 32, chloroplastic-like isoform X2 [Fragaria vesca subsp. vesca]	-1.12848	2.52157e-30	4.14223e-29	yes	down		augustus_masked-Fvb5-3-processed-gene-116.6	PREDICTED: peptidyl-prolyl cis-trans isomerase FKBP18, chloroplastic isoform X2 [Fragaria vesca subsp. vesca]	1.79256	0.00198982	0.00516155	yes	up
maker-Fvb5-3-snap-gene-11.54	--	-1.0117	6.40677e-43	1.56929e-41	yes	down		augustus_masked-Fvb6-3-processed-gene-259.5	PREDICTED: NAC domain-containing protein 90-like [Fragaria vesca subsp. vesca]	2.26796	0.00765491	0.017716	yes	up
snap_masked-Fvb6-1-processed-gene-171.30	PREDICTED: uncharacterized protein LOC101314294 [Fragaria vesca subsp. vesca]	-1.37212	8.91939e-05	0.00028871	yes	down		maker-Fvb1-1-augustus-gene-185.31	PREDICTED: UDP-glycosyltransferase 84B2-like [Fragaria vesca subsp. vesca]	3.97307	4.34733e-09	2.25687e-08	yes	up
maker-Fvb4-3-augustus-gene-113.61	PREDICTED: eukaryotic peptide chain release factor subunit 1-3 [Fragaria vesca subsp. vesca]	-1.16934	1.65229e-77	8.78954e-76	yes	down		maker-Fvb6-2-augustus-gene-147.34	PREDICTED: NAC domain-containing protein 90-like [Fragaria vesca subsp. vesca]	1.55424	0.00194247	0.00504877	yes	up
augustus_masked-Fvb7-4-processed-gene-110.6	PREDICTED: G-type lectin S-receptor-like serine/threonine-protein kinase SD2-2 [Fragaria vesca subsp. vesca]	-2.30092	1.38649e-31	2.38451e-30	yes	down		maker-Fvb4-3-snap-gene-81.65	PREDICTED: universal stress protein A-like protein [Fragaria vesca subsp. vesca]	1.81782	4.06544e-81	2.32106e-79	yes	up
maker-Fvb4-1-augustus-gene-141.32	PREDICTED: protein MAK16 homolog [Fragaria vesca subsp. vesca]	-1.15147	2.24649e-26	3.12875e-25	yes	down		maker-Fvb5-1-snap-gene-128.48	PREDICTED: flavonol synthase 3-like [Fragaria vesca subsp. vesca]	1.35913	7.58804e-14	5.6402e-13	yes	up
augustus_masked-Fvb2-4-processed-gene-224.15	PREDICTED: uncharacterized protein LOC101310484 [Fragaria vesca subsp. vesca]	-1.32604	6.55346e-28	9.76289e-27	yes	down		maker-Fvb5-2-augustus-gene-1.41	PREDICTED: acid beta-fructofuranosidase-like [Fragaria vesca subsp. vesca]	3.73888	7.62711e-14	5.66832e-13	yes	up
maker-Fvb2-3-augustus-gene-117.40	PREDICTED: serine/threonine-protein kinase ATR [Fragaria vesca subsp. vesca]	-1.12805	0.0240831	0.0494942	yes	down		snap_masked-Fvb1-3-processed-gene-36.30	PREDICTED: putative transcription factor bHLH041 [Fragaria vesca subsp. vesca]	3.83998	3.90173e-16	3.33177e-15	yes	up
maker-Fvb5-3-augustus-gene-185.44	PREDICTED: ATP-dependent RNA helicase DHX36 [Fragaria vesca subsp. vesca]	-1.36252	1.1611e-46	3.15398e-45	yes	down		maker-Fvb1-3-augustus-gene-66.30	PREDICTED: pentatricopeptide repeat-containing protein At1g09820-like [Fragaria vesca subsp. vesca]	1.33143	0.0206628	0.0432626	yes	up
augustus_masked-Fvb7-1-processed-gene-284.10	PREDICTED: uncharacterized protein LOC101298658 [Fragaria vesca subsp. vesca]	-1.08187	7.7783e-17	6.92965e-16	yes	down		maker-Fvb1-2-snap-gene-86.76	hypothetical protein RchiOBHm_Chr2g0101651 [Rosa chinensis]	1.28825	1.36442e-80	7.66139e-79	yes	up
MSTRG.49974	PREDICTED: proline-rich extensin-like protein EPR1 [Pyrus x bretschneideri]	-1.06442	2.93216e-12	1.9489e-11	yes	down		augustus_masked-Fvb3-1-processed-gene-170.7	PREDICTED: probable F-box protein At4g22030 [Fragaria vesca subsp. vesca]	5.91937	4.57105e-12	2.99321e-11	yes	up
augustus_masked-Fvb2-4-processed-gene-74.5	PREDICTED: cysteine-rich repeat secretory protein 38-like [Fragaria vesca subsp. vesca]	-1.80718	1.55062e-11	9.77319e-11	yes	down		maker-Fvb2-3-augustus-gene-171.28	PREDICTED: glucan endo-1,3-beta-D-glucosidase [Fragaria vesca subsp. vesca]	1.19349	0.00198719	0.00515493	yes	up
maker-Fvb1-4-augustus-gene-26.49	PREDICTED: probable pectinesterase 53 [Fragaria vesca subsp. vesca]	-2.79221	0.000339633	0.00100547	yes	down		maker-Fvb3-1-augustus-gene-315.64	PREDICTED: rho GDP-dissociation inhibitor 1 [Fragaria vesca subsp. vesca]	1.46913	9.07586e-09	4.57504e-08	yes	up
MSTRG.26371	dihydroceramide fatty acyl 2-hydroxylase FAH2-like [Rosa chinensis]	-2.71847	4.76939e-40	1.07147e-38	yes	down		augustus_masked-Fvb3-4-processed-gene-120.6	PREDICTED: putative pentatricopeptide repeat-containing protein At3g25970 [Fragaria vesca subsp. vesca]	1.04754	0.0028552	0.00719855	yes	up
maker-Fvb7-1-augustus-gene-131.43	PREDICTED: cyclin-U4-1 [Fragaria vesca subsp. vesca]	-1.03004	0.0124921	0.0275539	yes	down		maker-Fvb6-2-snap-gene-223.55	PREDICTED: uncharacterized protein LOC101292730 [Fragaria vesca subsp. vesca]	1.16318	5.32382e-08	2.49905e-07	yes	up
maker-Fvb5-2-snap-gene-77.65	PREDICTED: respiratory burst oxidase homolog protein A-like isoform X2 [Fragaria vesca subsp. vesca]	-1.5497	1.48962e-11	9.40156e-11	yes	down		maker-Fvb6-4-augustus-gene-288.39	PREDICTED: regulatory protein NPR3-like [Fragaria vesca subsp. vesca]	2.14752	9.31537e-152	1.50578e-149	yes	up
maker-Fvb7-3-augustus-gene-68.61	PREDICTED: folylpolyglutamate synthase [Fragaria vesca subsp. vesca]	-1.0908	3.00756e-38	6.35332e-37	yes	down		maker-Fvb6-2-augustus-gene-324.57	PREDICTED: formimidoyltransferase-cyclodeaminase-like isoform X1 [Fragaria vesca subsp. vesca]	1.39243	3.92655e-07	1.68879e-06	yes	up
augustus_masked-Fvb7-2-processed-gene-170.5	PREDICTED: MADS-box protein SOC1-like isoform X1 [Fragaria vesca subsp. vesca]	-1.22355	2.32082e-22	2.72478e-21	yes	down		maker-Fvb3-1-snap-gene-243.40	auxin-induced protein 15A-like [Rosa chinensis]	1.09791	8.25988e-05	0.000268696	yes	up
maker-Fvb1-4-augustus-gene-49.61	PREDICTED: phosphoinositide phosphatase SAC6 [Fragaria vesca subsp. vesca]	-1.2018	2.23021e-53	7.20752e-52	yes	down		maker-Fvb5-1-augustus-gene-207.33	PREDICTED: 26S proteasome non-ATPase regulatory subunit 2 homolog A-like [Fragaria vesca subsp. vesca]	1.67281	8.43079e-40	1.87619e-38	yes	up
maker-Fvb2-1-augustus-gene-194.38	PREDICTED: lactation elevated protein 1 [Fragaria vesca subsp. vesca]	-2.78585	2.62292e-47	7.24245e-46	yes	down		augustus_masked-Fvb5-1-processed-gene-146.1	PREDICTED: disease resistance protein RPM1-like [Fragaria vesca subsp. vesca]	1.31829	0.000264384	0.000795895	yes	up
maker-Fvb7-3-snap-gene-54.64	PREDICTED: potassium transporter 2 [Fragaria vesca subsp. vesca]	-1.2844	1.67937e-65	7.12791e-64	yes	down		maker-Fvb4-2-snap-gene-21.78	PREDICTED: purple acid phosphatase 7-like [Fragaria vesca subsp. vesca]	2.93587	8.78896e-248	4.10342e-245	yes	up
maker-Fvb1-3-snap-gene-117.34	cinnamyl alcohol dehydrogenase [Fragaria x ananassa]	-1.31004	0.000452624	0.00131364	yes	down		MSTRG.60697	PREDICTED: LOW QUALITY PROTEIN: probable isoleucine--tRNA ligase, cytoplasmic [Fragaria vesca subsp. vesca]	1.05469	0.00196896	0.00511213	yes	up
maker-Fvb5-1-augustus-gene-97.45	PREDICTED: protein NUCLEAR FUSION DEFECTIVE 4-like [Fragaria vesca subsp. vesca]	-1.66301	2.97358e-52	9.35995e-51	yes	down		augustus_masked-Fvb1-2-processed-gene-36.10	hypothetical protein RchiOBHm_Chr2g0089511 [Rosa chinensis]	2.48784	8.71064e-16	7.30661e-15	yes	up
augustus_masked-Fvb3-4-processed-gene-3.1	PREDICTED: uncharacterized protein LOC101311171 [Fragaria vesca subsp. vesca]	-1.08654	1.59946e-34	2.99861e-33	yes	down		maker-Fvb4-2-augustus-gene-130.32	PREDICTED: DNA repair protein REV1 [Fragaria vesca subsp. vesca]	1.02034	0.000186532	0.000574795	yes	up
maker-Fvb7-1-snap-gene-308.79	PREDICTED: ABC transporter C family member 10-like [Fragaria vesca subsp. vesca]	-1.78963	2.73344e-111	2.60799e-109	yes	down		maker-Fvb6-1-augustus-gene-134.37	PREDICTED: uncharacterized protein LOC101301403 [Fragaria vesca subsp. vesca]	3.78065	1.60189e-100	1.29925e-98	yes	up
maker-Fvb3-2-snap-gene-156.35	PREDICTED: GDSL esterase/lipase At1g28580-like [Fragaria vesca subsp. vesca]	-2.08902	8.88126e-36	1.73211e-34	yes	down		maker-Fvb7-3-augustus-gene-140.29	PREDICTED: spindle and kinetochore-associated protein 1 homolog [Fragaria vesca subsp. vesca]	1.27258	0.0173115	0.0369379	yes	up
snap_masked-Fvb7-1-processed-gene-198.21	PREDICTED: hydroquinone glucosyltransferase-like [Fragaria vesca subsp. vesca]	-1.81946	3.82893e-15	3.08704e-14	yes	down		MSTRG.37212	PREDICTED: putative elongation of fatty acids protein DDB_G0272012 [Fragaria vesca subsp. vesca]	1.1505	3.81463e-20	4.0185e-19	yes	up
snap_masked-Fvb4-4-processed-gene-137.15	uncharacterized protein LOC112196494 [Rosa chinensis]	-1.32469	6.93061e-33	1.24066e-31	yes	down		maker-Fvb2-1-augustus-gene-8.38	TMV resistance protein N-like [Rosa chinensis]	2.65351	1.3274e-12	9.05774e-12	yes	up
maker-Fvb3-2-augustus-gene-41.60	PREDICTED: probable LRR receptor-like serine/threonine-protein kinase At2g24230 [Fragaria vesca subsp. vesca]	-1.47047	1.35261e-07	6.0862e-07	yes	down		augustus_masked-Fvb7-4-processed-gene-175.1	PREDICTED: uncharacterized protein LOC105352906 [Fragaria vesca subsp. vesca]	2.55	7.02097e-11	4.21405e-10	yes	up
maker-Fvb3-4-augustus-gene-210.31	PREDICTED: ubiquitin carboxyl-terminal hydrolase 15 isoform X2 [Fragaria vesca subsp. vesca]	-1.9469	2.43361e-96	1.82127e-94	yes	down		MSTRG.49979	PREDICTED: receptor-like protein 12 isoform X3 [Fragaria vesca subsp. vesca]	1.10701	2.88614e-37	5.92403e-36	yes	up
MSTRG.59938	PREDICTED: probable protein phosphatase 2C 51 [Fragaria vesca subsp. vesca]	-3.09178	1.76634e-36	3.54718e-35	yes	down		maker-Fvb1-2-snap-gene-222.21	PREDICTED: probable protein S-acyltransferase 1 isoform X1 [Fragaria vesca subsp. vesca]	1.199	6.23605e-25	8.16001e-24	yes	up
MSTRG.46310	pollen-specific leucine-rich repeat extensin-like protein 3 [Rosa chinensis]	-1.83421	2.12728e-06	8.43865e-06	yes	down		snap_masked-Fvb1-2-processed-gene-98.38	PREDICTED: probable esterase PIR7A isoform X1 [Fragaria vesca subsp. vesca]	1.84871	1.76377e-09	9.45585e-09	yes	up
maker-Fvb7-1-augustus-gene-200.53	PREDICTED: DEAD-box ATP-dependent RNA helicase 31-like [Fragaria vesca subsp. vesca]	-1.83194	1.52379e-96	1.14785e-94	yes	down		MSTRG.60519	PREDICTED: uncharacterized protein LOC101305494 [Fragaria vesca subsp. vesca]	2.36647	9.82582e-46	2.60594e-44	yes	up
maker-Fvb1-4-augustus-gene-29.51	PREDICTED: phytochrome E-like isoform X1 [Fragaria vesca subsp. vesca]	-2.8414	1.89435e-146	2.87042e-144	yes	down		MSTRG.8005	PREDICTED: protein VTE6, chloroplastic isoform X2 [Prunus mume]	1.66282	1.42714e-09	7.72407e-09	yes	up
augustus_masked-Fvb2-4-processed-gene-235.0	PREDICTED: SCP2 sterol-binding domain-containing protein 1-like [Fragaria vesca subsp. vesca]	-1.00744	0.00385533	0.00947008	yes	down		maker-Fvb2-1-augustus-gene-226.73	PREDICTED: UDP-glucuronate:xylan alpha-glucuronosyltransferase 2 isoform X1 [Fragaria vesca subsp. vesca]	1.93951	2.48037e-06	9.77103e-06	yes	up
MSTRG.11342	putative ribonuclease H-like domain, reverse transcriptase zinc-binding domain-containing protein [Rosa chinensis]	-3.86864	9.00014e-20	9.31155e-19	yes	down		MSTRG.24927	hypothetical protein PRUPE_3G297300, partial [Prunus persica]	1.32303	3.21517e-98	2.50397e-96	yes	up
MSTRG.5031	PREDICTED: 2-Cys peroxiredoxin BAS1, chloroplastic [Fragaria vesca subsp. vesca]	-1.65947	0.00849551	0.0194485	yes	down		augustus_masked-Fvb6-4-processed-gene-83.11	PREDICTED: BAHD acyltransferase DCR [Fragaria vesca subsp. vesca]	2.12725	2.47576e-07	1.08558e-06	yes	up
maker-Fvb6-3-augustus-gene-283.40	PREDICTED: fructose-bisphosphate aldolase cytoplasmic isozyme-like isoform X1 [Fragaria vesca subsp. vesca]	-1.07356	8.58283e-38	1.78722e-36	yes	down		maker-Fvb6-3-snap-gene-52.70	putative protein kinase RLK-Pelle-DLSV family [Rosa chinensis]	2.61638	0.016506	0.0353899	yes	up
maker-Fvb5-2-augustus-gene-219.29	PREDICTED: protein tumorous imaginal discs, mitochondrial [Fragaria vesca subsp. vesca]	-2.10997	7.36006e-78	3.94492e-76	yes	down		augustus_masked-Fvb1-3-processed-gene-118.5	PREDICTED: uncharacterized protein At4g38062 [Fragaria vesca subsp. vesca]	1.01587	9.14825e-07	3.77538e-06	yes	up
maker-Fvb3-2-augustus-gene-97.64	PREDICTED: receptor-like serine/threonine-protein kinase At1g78530 [Fragaria vesca subsp. vesca]	-1.74598	3.99857e-15	3.21845e-14	yes	down		maker-Fvb7-2-augustus-gene-291.38	PREDICTED: protein FIZZY-RELATED 3 [Fragaria vesca subsp. vesca]	3.43529	0.00211025	0.00544638	yes	up
maker-Fvb7-2-snap-gene-318.77	PREDICTED: plastid division protein PDV1 [Fragaria vesca subsp. vesca]	-1.42458	3.00727e-16	2.58767e-15	yes	down		augustus_masked-Fvb3-1-processed-gene-37.1	PREDICTED: PRA1 family protein B1-like [Fragaria vesca subsp. vesca]	1.57967	1.16281e-06	4.74473e-06	yes	up
maker-Fvb4-3-snap-gene-115.54	ABC transporter B family member 11-like isoform X3 [Rosa chinensis]	-1.71901	3.22173e-06	1.25406e-05	yes	down		maker-Fvb1-4-augustus-gene-57.59	PREDICTED: zinc finger CCCH domain-containing protein 6 [Fragaria vesca subsp. vesca]	1.73118	4.50013e-11	2.74345e-10	yes	up
maker-Fvb6-1-augustus-gene-323.37	PREDICTED: psbP domain-containing protein 7, chloroplastic [Fragaria vesca subsp. vesca]	-1.28768	1.21296e-17	1.12759e-16	yes	down		augustus_masked-Fvb3-3-processed-gene-273.5	PREDICTED: uncharacterized protein At1g08160 [Fragaria vesca subsp. vesca]	2.46095	0.0144313	0.031365	yes	up
maker-Fvb2-2-augustus-gene-86.53	PREDICTED: purple acid phosphatase 15 [Fragaria vesca subsp. vesca]	-1.42879	7.1821e-62	2.85225e-60	yes	down		maker-Fvb2-2-augustus-gene-7.53	PREDICTED: putative nucleobase-ascorbate transporter 10 [Fragaria vesca subsp. vesca]	1.62521	0.00012337	0.000390523	yes	up
MSTRG.41521	PREDICTED: protein FAR1-RELATED SEQUENCE 5-like [Fragaria vesca subsp. vesca]	-1.81276	1.13084e-74	5.70858e-73	yes	down		maker-Fvb5-3-augustus-gene-228.47	PREDICTED: acyl carrier protein 1, chloroplastic-like [Fragaria vesca subsp. vesca]	1.43676	1.18652e-58	4.37051e-57	yes	up
maker-Fvb1-1-snap-gene-216.53	PREDICTED: NAC domain-containing protein 7 [Fragaria vesca subsp. vesca]	-1.63809	0.0136694	0.0298685	yes	down		maker-Fvb1-4-snap-gene-214.49	PREDICTED: probable ADP-ribosylation factor GTPase-activating protein AGD11 [Fragaria vesca subsp. vesca]	1.42369	8.0033e-27	1.13738e-25	yes	up
maker-Fvb6-2-snap-gene-278.50	putative transcription factor MADS-type1 family [Rosa chinensis]	-1.82982	0.016178	0.0347628	yes	down		maker-Fvb3-3-snap-gene-209.21	PREDICTED: jacalin-related lectin 3-like isoform X2 [Fragaria vesca subsp. vesca]	3.66241	0.0072323	0.0168213	yes	up
maker-Fvb1-4-snap-gene-196.35	LOW QUALITY PROTEIN: uncharacterized protein LOC112176717 [Rosa chinensis]	-1.73194	1.64541e-75	8.43111e-74	yes	down		maker-Fvb2-3-augustus-gene-6.44	PREDICTED: putative RNA methyltransferase At5g10620 isoform X1 [Fragaria vesca subsp. vesca]	1.18714	5.11263e-17	4.60072e-16	yes	up
maker-Fvb1-1-augustus-gene-230.34	PREDICTED: pectinesterase/pectinesterase inhibitor PPE8B-like [Fragaria vesca subsp. vesca]	-1.51273	2.113e-06	8.38527e-06	yes	down		maker-Fvb6-3-augustus-gene-292.41	PREDICTED: glucomannan 4-beta-mannosyltransferase 9-like [Fragaria vesca subsp. vesca]	1.69282	0.000334565	0.000991366	yes	up
maker-Fvb7-4-augustus-gene-24.63	PREDICTED: uncharacterized protein LOC101298945 [Fragaria vesca subsp. vesca]	-5.91304	4.64057e-303	3.49853e-300	yes	down		MSTRG.17393	PREDICTED: CBL-interacting serine/threonine-protein kinase 11 [Fragaria vesca subsp. vesca]	2.89047	9.34993e-70	4.33671e-68	yes	up
maker-Fvb2-4-augustus-gene-74.34	PREDICTED: uncharacterized protein LOC101295384 [Fragaria vesca subsp. vesca]	-1.1755	1.28574e-12	8.78384e-12	yes	down		snap_masked-Fvb6-4-processed-gene-76.21	PREDICTED: abscisic acid receptor PYL4 [Fragaria vesca subsp. vesca]	2.0202	1.34857e-11	8.54417e-11	yes	up
augustus_masked-Fvb7-2-processed-gene-121.7	PREDICTED: desiccation protectant protein Lea14 homolog [Fragaria vesca subsp. vesca]	-1.50532	3.56459e-11	2.18892e-10	yes	down		augustus_masked-Fvb5-2-processed-gene-91.5	PREDICTED: betaine aldehyde dehydrogenase 1, chloroplastic isoform X2 [Prunus mume]	1.33105	1.99056e-31	3.4043e-30	yes	up
maker-Fvb3-3-snap-gene-167.36	PREDICTED: uncharacterized protein LOC101315024 isoform X1 [Fragaria vesca subsp. vesca]	-1.6175	4.97618e-56	1.7187e-54	yes	down		MSTRG.40026	PREDICTED: kynurenine--oxoglutarate transaminase-like [Fragaria vesca subsp. vesca]	1.05118	4.86256e-14	3.66229e-13	yes	up
augustus_masked-Fvb1-1-processed-gene-171.5	PREDICTED: uncharacterized protein LOC105352100 [Fragaria vesca subsp. vesca]	-1.69336	5.05257e-08	2.37609e-07	yes	down		maker-Fvb7-4-augustus-gene-189.35	PREDICTED: uncharacterized protein LOC101309290 isoform X1 [Fragaria vesca subsp. vesca]	2.07383	3.72723e-214	1.18621e-211	yes	up
snap_masked-Fvb4-2-processed-gene-98.16	PREDICTED: pentatricopeptide repeat-containing protein At1g63330-like isoform X1 [Fragaria vesca subsp. vesca]	-2.85499	2.94014e-10	1.68131e-09	yes	down		augustus_masked-Fvb3-2-processed-gene-88.5	hypothetical protein RchiOBHm_Chr5g0028161 [Rosa chinensis]	1.20367	0.00474729	0.0114477	yes	up
augustus_masked-Fvb3-2-processed-gene-197.0	PREDICTED: protein TIC 20-v, chloroplastic [Fragaria vesca subsp. vesca]	-1.87246	6.76867e-36	1.32826e-34	yes	down		MSTRG.13386	PREDICTED: uncharacterized protein LOC101291486 [Fragaria vesca subsp. vesca]	2.62093	5.89676e-26	8.07083e-25	yes	up
maker-Fvb6-1-augustus-gene-106.58	PREDICTED: myosin-10 [Fragaria vesca subsp. vesca]	-1.61516	8.63067e-63	3.49237e-61	yes	down		maker-Fvb3-3-snap-gene-152.30	PREDICTED: uncharacterized protein LOC101297045 isoform X3 [Fragaria vesca subsp. vesca]	1.49488	1.41195e-94	1.03314e-92	yes	up
augustus_masked-Fvb6-1-processed-gene-265.7	PREDICTED: protein SLOW GREEN 1, chloroplastic [Fragaria vesca subsp. vesca]	-1.00432	6.20092e-08	2.89334e-07	yes	down		maker-Fvb1-2-augustus-gene-48.55	PREDICTED: reticulon-like protein B21 [Fragaria vesca subsp. vesca]	1.28354	7.6587e-07	3.18871e-06	yes	up
maker-Fvb4-3-augustus-gene-30.51	PREDICTED: uncharacterized protein LOC101308572 [Fragaria vesca subsp. vesca]	-2.50112	4.0649e-20	4.27675e-19	yes	down		maker-Fvb6-2-augustus-gene-94.36	PREDICTED: protein trichome birefringence-like 39 [Fragaria vesca subsp. vesca]	1.53247	1.11835e-11	7.1263e-11	yes	up
maker-Fvb6-2-augustus-gene-159.24	PREDICTED: protein ROS1 [Fragaria vesca subsp. vesca]	-1.5382	1.03374e-100	8.39927e-99	yes	down		snap_masked-Fvb7-2-processed-gene-109.18	PREDICTED: cyclic nucleotide-gated ion channel 1-like isoform X2 [Fragaria vesca subsp. vesca]	1.52466	2.36356e-17	2.1674e-16	yes	up
MSTRG.55368	PREDICTED: transcription factor bHLH147-like [Fragaria vesca subsp. vesca]	-3.06678	1.55409e-198	4.14315e-196	yes	down		maker-Fvb4-3-snap-gene-143.43	PREDICTED: RING finger and CHY zinc finger domain-containing protein 1 [Fragaria vesca subsp. vesca]	1.05976	7.47247e-20	7.75545e-19	yes	up
maker-Fvb6-2-augustus-gene-182.35	PREDICTED: L-ascorbate peroxidase 2, cytosolic-like [Fragaria vesca subsp. vesca]	-2.16039	1.33007e-68	6.00856e-67	yes	down		maker-Fvb3-1-augustus-gene-137.15	PREDICTED: bifunctional aspartokinase/homoserine dehydrogenase 2, chloroplastic isoform X3 [Fragaria vesca subsp. vesca]	1.31177	6.01516e-09	3.08012e-08	yes	up
snap_masked-Fvb4-3-processed-gene-51.24	PREDICTED: homologous-pairing protein 2 homolog [Fragaria vesca subsp. vesca]	-1.44046	6.71583e-13	4.67561e-12	yes	down		augustus_masked-Fvb5-4-processed-gene-164.3	PREDICTED: uncharacterized protein LOC101304550 [Fragaria vesca subsp. vesca]	1.1653	9.05712e-20	9.36839e-19	yes	up
MSTRG.13405	PREDICTED: putative sodium-codownled neutral amino acid transporter 11 [Fragaria vesca subsp. vesca]	-1.49111	0.000972203	0.00266589	yes	down		maker-Fvb6-3-snap-gene-194.46	beta-galactosidase [Fragaria x ananassa]	1.16767	2.18798e-07	9.63386e-07	yes	up
maker-Fvb6-4-snap-gene-173.27	PREDICTED: translation factor GUF1 homolog, chloroplastic [Fragaria vesca subsp. vesca]	-1.2295	9.25562e-68	4.12849e-66	yes	down		maker-Fvb2-3-snap-gene-68.73	PREDICTED: zinc finger CCCH domain-containing protein 20 [Fragaria vesca subsp. vesca]	4.95022	1.44607e-11	9.13233e-11	yes	up
maker-Fvb6-4-augustus-gene-155.32	PREDICTED: uncharacterized protein LOC101303140 [Fragaria vesca subsp. vesca]	-1.28207	2.55624e-10	1.46817e-09	yes	down		maker-Fvb3-3-augustus-gene-135.12	PREDICTED: proteinaceous RNase P 2 [Fragaria vesca subsp. vesca]	1.11309	7.38321e-09	3.75264e-08	yes	up
maker-Fvb3-4-augustus-gene-40.49	PREDICTED: protein NUCLEAR FUSION DEFECTIVE 4 [Fragaria vesca subsp. vesca]	-4.42383	7.1421e-27	1.01763e-25	yes	down		maker-Fvb3-4-augustus-gene-45.23	PREDICTED: probable N-acetyltransferase HLS1 [Fragaria vesca subsp. vesca]	5.06188	0.000129427	0.00040825	yes	up
maker-Fvb4-1-augustus-gene-154.36	PREDICTED: probable transcription factor GLK2 [Fragaria vesca subsp. vesca]	-1.2966	4.93484e-14	3.71551e-13	yes	down		augustus_masked-Fvb3-4-processed-gene-8.14	PREDICTED: receptor-like protein 2 [Fragaria vesca subsp. vesca]	1.10303	1.68968e-24	2.166e-23	yes	up
maker-Fvb6-3-augustus-gene-226.35	PREDICTED: translation factor GUF1 homolog, chloroplastic [Fragaria vesca subsp. vesca]	-1.4628	1.00028e-79	5.57853e-78	yes	down		MSTRG.32412	PREDICTED: uncharacterized protein LOC105350684 [Fragaria vesca subsp. vesca]	2.38546	1.71776e-10	1.0009e-09	yes	up
maker-Fvb3-3-augustus-gene-130.34	PREDICTED: pirin-like protein [Fragaria vesca subsp. vesca]	-1.91828	1.5755e-05	5.63759e-05	yes	down		maker-Fvb3-1-snap-gene-270.54	PREDICTED: linoleate 13S-lipoxygenase 3-1, chloroplastic-like [Fragaria vesca subsp. vesca]	2.34935	1.89573e-56	6.61714e-55	yes	up
maker-Fvb4-4-augustus-gene-26.31	PREDICTED: dnaJ homolog subfamily B member 3 [Fragaria vesca subsp. vesca]	-2.03978	4.16769e-28	6.24719e-27	yes	down		MSTRG.35005	PREDICTED: leucine-rich repeat extensin-like protein 4 isoform X1 [Pyrus x bretschneideri]	1.58532	1.99808e-25	2.6696e-24	yes	up
maker-Fvb5-2-snap-gene-28.37	endo-beta-1,4-glucanase [Fragaria x ananassa]	-1.72051	5.99036e-21	6.58818e-20	yes	down		maker-Fvb3-4-augustus-gene-83.35	PREDICTED: F-box/FBD/LRR-repeat protein At1g13570-like [Fragaria vesca subsp. vesca]	1.65901	4.72624e-10	2.65954e-09	yes	up
MSTRG.61756	PREDICTED: downF0187 protein At3g61320, chloroplastic-like [Fragaria vesca subsp. vesca]	-1.05052	3.46969e-39	7.56048e-38	yes	down		maker-Fvb6-3-snap-gene-52.68	PREDICTED: G-type lectin S-receptor-like serine/threonine-protein kinase At4g27290 [Fragaria vesca subsp. vesca]	1.33372	6.10631e-06	2.29501e-05	yes	up
maker-Fvb7-1-augustus-gene-296.38	PREDICTED: probable protein phosphatase 2C 51 [Fragaria vesca subsp. vesca]	-3.09178	1.76634e-36	3.54718e-35	yes	down		maker-Fvb6-1-augustus-gene-299.59	PREDICTED: uncharacterized protein LOC101313427 [Fragaria vesca subsp. vesca]	2.06662	0.0209172	0.0437365	yes	up
maker-Fvb6-3-augustus-gene-353.35	PREDICTED: ferritin-3, chloroplastic [Fragaria vesca subsp. vesca]	-2.77719	8.56846e-124	9.57585e-122	yes	down		maker-Fvb6-4-snap-gene-9.64	uncharacterized protein LOC112165550 [Rosa chinensis]	4.55047	3.34862e-05	0.000114769	yes	up
maker-Fvb6-1-augustus-gene-255.38	PREDICTED: phenylalanine ammonia-lyase 1 [Fragaria vesca subsp. vesca]	-3.35906	0	0	yes	down		maker-Fvb6-1-snap-gene-131.31	PREDICTED: uncharacterized protein LOC101297931 [Fragaria vesca subsp. vesca]	1.83279	1.25222e-26	1.76188e-25	yes	up
maker-Fvb3-3-augustus-gene-30.64	PREDICTED: squamosa promoter-binding-like protein 3 [Fragaria vesca subsp. vesca]	-2.08603	2.36542e-15	1.93062e-14	yes	down		MSTRG.30178	putative RNA-directed DNA polymerase [Rosa chinensis]	1.61524	1.13218e-34	2.13169e-33	yes	up
maker-Fvb5-4-augustus-gene-7.32	PREDICTED: homeobox protein knotted-1-like 7 [Fragaria vesca subsp. vesca]	-1.20449	2.6668e-31	4.53637e-30	yes	down		MSTRG.39740	PREDICTED: UDP-glycosyltransferase 91C1 [Fragaria vesca subsp. vesca]	3.55593	9.48203e-31	1.58279e-29	yes	up
maker-Fvb1-2-snap-gene-43.97	PREDICTED: protein SRG1-like [Fragaria vesca subsp. vesca]	-1.75562	1.05337e-31	1.81767e-30	yes	down		maker-Fvb2-4-augustus-gene-98.43	PREDICTED: G-box-binding factor 4-like [Fragaria vesca subsp. vesca]	1.19493	0.000448513	0.00130257	yes	up
maker-Fvb5-3-snap-gene-269.57	PREDICTED: uncharacterized protein LOC105351402 [Fragaria vesca subsp. vesca]	-1.01443	5.72983e-38	1.20266e-36	yes	down		maker-Fvb2-1-snap-gene-87.55	disease resistance protein RPM1-like [Rosa chinensis]	1.61793	1.81326e-56	6.33891e-55	yes	up
maker-Fvb7-1-augustus-gene-183.52	PREDICTED: GDSL esterase/lipase At4g01130 isoform X2 [Fragaria vesca subsp. vesca]	-1.9714	0.00227941	0.00585355	yes	down		maker-Fvb6-4-snap-gene-117.36	PREDICTED: E3 ubiquitin-protein ligase RFWD3 [Fragaria vesca subsp. vesca]	2.96755	1.26638e-05	4.57902e-05	yes	up
augustus_masked-Fvb7-3-processed-gene-33.17	PREDICTED: leucine-rich repeat receptor protein kinase EXS [Fragaria vesca subsp. vesca]	-1.75626	7.23707e-05	0.000237481	yes	down		MSTRG.65399	PREDICTED: linoleate 13S-lipoxygenase 2-1, chloroplastic-like [Fragaria vesca subsp. vesca]	1.55007	0.000106018	0.000338981	yes	up
MSTRG.2477	PREDICTED: putative protein TPRXL isoform X1 [Prunus mume]	-1.36974	6.97078e-14	5.19482e-13	yes	down		maker-Fvb3-1-augustus-gene-5.62	PREDICTED: TMV resistance protein N-like [Fragaria vesca subsp. vesca]	1.02286	0.0108035	0.0241643	yes	up
maker-Fvb4-3-augustus-gene-121.39	PREDICTED: dihydrolipoyl dehydrogenase, mitochondrial [Fragaria vesca subsp. vesca]	-1.1297	6.6588e-52	2.07399e-50	yes	down		augustus_masked-Fvb2-4-processed-gene-150.4	PREDICTED: putative F-box protein At1g65770 [Fragaria vesca subsp. vesca]	1.40075	0.00650958	0.0152787	yes	up
maker-Fvb6-3-augustus-gene-14.49	PREDICTED: uncharacterized protein LOC101314011 [Fragaria vesca subsp. vesca]	-1.14737	4.93201e-49	1.42203e-47	yes	down		augustus_masked-Fvb7-2-processed-gene-240.11	PREDICTED: nematode resistance protein-like HSPRO2 [Fragaria vesca subsp. vesca]	2.59046	1.15691e-17	1.07701e-16	yes	up
maker-Fvb5-2-snap-gene-67.59	PREDICTED: probable serine/threonine-protein kinase At1g18390 isoform X2 [Fragaria vesca subsp. vesca]	-1.21481	0.000272282	0.000817906	yes	down		maker-Fvb1-3-augustus-gene-76.37	PREDICTED: U1 small nuclear ribonucleoprotein 70 kDa [Fragaria vesca subsp. vesca]	1.23207	1.92825e-38	4.10349e-37	yes	up
maker-Fvb7-1-snap-gene-74.32	PREDICTED: ent-kaurenoic acid oxidase 1-like [Fragaria vesca subsp. vesca]	-1.46753	1.50924e-06	6.079e-06	yes	down		maker-Fvb4-1-snap-gene-31.43	hypothetical protein RchiOBHm_Chr5g0077251 [Rosa chinensis]	1.15827	7.70135e-06	2.86163e-05	yes	up
augustus_masked-Fvb6-2-processed-gene-65.4	PREDICTED: uncharacterized protein LOC101308691 [Fragaria vesca subsp. vesca]	-1.78208	3.18073e-13	2.26837e-12	yes	down		maker-Fvb5-4-snap-gene-23.60	PREDICTED: uncharacterized protein LOC101304584 [Fragaria vesca subsp. vesca]	1.05331	1.17377e-05	4.26393e-05	yes	up
maker-Fvb3-4-augustus-gene-222.43	PREDICTED: G-type lectin S-receptor-like serine/threonine-protein kinase B120 isoform X1 [Fragaria vesca subsp. vesca]	-1.96452	1.94293e-55	6.62844e-54	yes	down		snap_masked-Fvb5-4-processed-gene-248.36	uncharacterized protein LOC112167105 [Rosa chinensis]	1.57261	0.00886175	0.020208	yes	up
maker-Fvb1-1-snap-gene-266.64	PREDICTED: uncharacterized protein LOC101296995 [Fragaria vesca subsp. vesca]	-1.04826	0.000254605	0.000768645	yes	down		maker-Fvb2-4-augustus-gene-23.33	PREDICTED: uncharacterized protein LOC101294809 [Fragaria vesca subsp. vesca]	1.00133	1.345e-14	1.04739e-13	yes	up
maker-Fvb7-2-augustus-gene-258.64	PREDICTED: uncharacterized protein LOC101300762 [Fragaria vesca subsp. vesca]	-1.33555	7.86028e-38	1.6401e-36	yes	down		snap_masked-Fvb7-4-processed-gene-145.19	PREDICTED: UPF0565 protein C2orf69 homolog [Fragaria vesca subsp. vesca]	1.04008	0.00706315	0.016462	yes	up
snap_masked-Fvb1-3-processed-gene-4.27	PREDICTED: QWRF motif-containing protein 8-like [Fragaria vesca subsp. vesca]	-1.06861	2.4773e-16	2.14006e-15	yes	down		augustus_masked-Fvb6-3-processed-gene-431.5	PREDICTED: wound-induced protein 1 [Fragaria vesca subsp. vesca]	2.79244	4.86552e-33	8.76442e-32	yes	up
maker-Fvb2-1-augustus-gene-200.52	PREDICTED: protein TIFY 8 [Fragaria vesca subsp. vesca]	-1.05031	4.38331e-08	2.07259e-07	yes	down		maker-Fvb2-4-augustus-gene-25.19	putative gibberellin regulated protein [Rosa chinensis]	2.55546	1.35181e-11	8.56178e-11	yes	up
maker-Fvb3-4-augustus-gene-48.26	PREDICTED: omega-3 fatty acid desaturase, endoplasmic reticulum [Fragaria vesca subsp. vesca]	-1.11625	1.24095e-24	1.60328e-23	yes	down		maker-Fvb6-1-snap-gene-24.69	putative quinone oxidoreductase, partial [Fragaria x ananassa]	1.54151	9.02284e-28	1.3368e-26	yes	up
maker-Fvb2-4-augustus-gene-212.54	PREDICTED: protein TIFY 8 [Fragaria vesca subsp. vesca]	-1.27151	1.30315e-15	1.08283e-14	yes	down		maker-Fvb6-4-augustus-gene-212.52	PREDICTED: protein ASPARTIC PROTEASE IN GUARD CELL 2 [Fragaria vesca subsp. vesca]	1.49023	1.32855e-16	1.16766e-15	yes	up
augustus_masked-Fvb2-1-processed-gene-109.3	PREDICTED: transcription factor IBH1-like [Fragaria vesca subsp. vesca]	-1.36374	9.96529e-06	3.65356e-05	yes	down		maker-Fvb1-4-snap-gene-3.74	PREDICTED: uncharacterized protein LOC105353455 [Fragaria vesca subsp. vesca]	3.28805	1.24511e-05	4.50549e-05	yes	up
maker-Fvb7-1-augustus-gene-303.52	PREDICTED: nucleolar protein 58 [Fragaria vesca subsp. vesca]	-1.76361	2.86728e-29	4.51732e-28	yes	down		maker-Fvb2-4-augustus-gene-204.69	PREDICTED: probable LRR receptor-like serine/threonine-protein kinase At1g56140 [Fragaria vesca subsp. vesca]	1.78063	1.12761e-50	3.38048e-49	yes	up
augustus_masked-Fvb2-2-processed-gene-157.2	PREDICTED: 30S ribosomal protein S31, mitochondrial [Fragaria vesca subsp. vesca]	-1.23776	1.40874e-05	5.06707e-05	yes	down		maker-Fvb3-4-snap-gene-131.49	uncharacterized protein LOC18772280 isoform X2 [Prunus persica]	1.32787	1.48548e-43	3.70569e-42	yes	up
maker-Fvb3-3-augustus-gene-26.37	PREDICTED: 3&apos;-N-debenzoyl-2&apos;-deoxytaxol N-benzoyltransferase [Fragaria vesca subsp. vesca]	-5.21346	2.03171e-44	5.17498e-43	yes	down		maker-Fvb3-3-augustus-gene-98.21	PREDICTED: uncharacterized protein LOC101302521 [Fragaria vesca subsp. vesca]	1.0091	7.47019e-11	4.47579e-10	yes	up
maker-Fvb5-3-augustus-gene-36.30	PREDICTED: laccase-14-like [Fragaria vesca subsp. vesca]	-1.57122	1.16755e-49	3.4265e-48	yes	down		maker-Fvb6-3-augustus-gene-77.48	PREDICTED: snRNA-activating protein complex subunit-like isoform X1 [Fragaria vesca subsp. vesca]	1.12492	8.85623e-15	6.98055e-14	yes	up
maker-Fvb1-2-augustus-gene-38.48	PREDICTED: DEAD-box ATP-dependent RNA helicase 52B-like [Fragaria vesca subsp. vesca]	-1.1736	0.00605344	0.0143026	yes	down		augustus_masked-Fvb4-2-processed-gene-246.5	PREDICTED: putative calcium-transporting ATPase 13, plasma membrane-type [Fragaria vesca subsp. vesca]	2.00744	9.41735e-05	0.000303802	yes	up
maker-Fvb7-2-augustus-gene-128.58	PREDICTED: probable F-box protein At3g61730 isoform X1 [Fragaria vesca subsp. vesca]	-1.17862	0.0112056	0.024992	yes	down		snap_masked-Fvb6-2-processed-gene-255.27	PREDICTED: receptor-like protein 12 isoform X2 [Fragaria vesca subsp. vesca]	1.50878	3.49682e-112	3.38195e-110	yes	up
augustus_masked-Fvb6-1-processed-gene-287.8	PREDICTED: probable pyridoxal 5&apos;-phosphate synthase subunit PDX1 [Fragaria vesca subsp. vesca]	-2.10192	1.08936e-08	5.44358e-08	yes	down		snap_masked-Fvb3-4-processed-gene-235.32	PREDICTED: uncharacterized protein LOC101297157 [Fragaria vesca subsp. vesca]	1.0875	8.55131e-26	1.16297e-24	yes	up
MSTRG.23127	PREDICTED: glucose-6-phosphate/phosphate translocator 1, chloroplastic-like [Fragaria vesca subsp. vesca]	-1.08366	3.26008e-21	3.62486e-20	yes	down		maker-Fvb2-2-augustus-gene-244.29	PREDICTED: probable receptor-like serine/threonine-protein kinase At4g34500 [Fragaria vesca subsp. vesca]	1.09076	0.0153192	0.0330921	yes	up
augustus_masked-Fvb6-1-processed-gene-341.10	PREDICTED: uncharacterized protein LOC101305683 [Fragaria vesca subsp. vesca]	-2.15611	0.0004088	0.00119436	yes	down		maker-Fvb2-3-snap-gene-63.72	uncharacterized protein LOC110769988 [Prunus avium]	1.11724	6.61135e-10	3.67601e-09	yes	up
maker-Fvb6-4-augustus-gene-12.54	PREDICTED: succinate dehydrogenase [ubiquinone] iron-sulfur subunit 2, mitochondrial-like [Fragaria vesca subsp. vesca]	-1.46665	1.55317e-29	2.48485e-28	yes	down		maker-Fvb4-3-snap-gene-13.62	PREDICTED: UDP-glycosyltransferase 74B1-like [Fragaria vesca subsp. vesca]	1.38151	2.62431e-21	2.92929e-20	yes	up
maker-Fvb4-4-augustus-gene-81.46	PREDICTED: eukaryotic peptide chain release factor subunit 1-3 [Fragaria vesca subsp. vesca]	-1.00433	1.00503e-44	2.58641e-43	yes	down		maker-Fvb4-2-augustus-gene-158.35	PREDICTED: uncharacterized protein LOC105350077 [Fragaria vesca subsp. vesca]	1.55232	9.69335e-05	0.000311973	yes	up
maker-Fvb1-3-augustus-gene-10.50	PREDICTED: uncharacterized methyltransferase At2g41040, chloroplastic-like isoform X2 [Fragaria vesca subsp. vesca]	-2.34357	2.80471e-141	3.94443e-139	yes	down		augustus_masked-Fvb7-1-processed-gene-217.5	PREDICTED: putative serine/threonine-protein kinase [Fragaria vesca subsp. vesca]	2.66524	0.00854735	0.019555	yes	up
augustus_masked-Fvb6-2-processed-gene-306.15	phosphate transporter PHO1-like protein 9 [Fragaria x ananassa]	-1.6354	2.21127e-06	8.75485e-06	yes	down		augustus_masked-Fvb3-4-processed-gene-73.2	PREDICTED: zinc finger protein ZAT11-like [Fragaria vesca subsp. vesca]	2.48141	0.000131335	0.000413842	yes	up
augustus_masked-Fvb2-1-processed-gene-118.9	PREDICTED: GLABRA2 expression modulator-like [Fragaria vesca subsp. vesca]	-1.02269	0.00298853	0.00750588	yes	down		maker-Fvb5-3-snap-gene-37.26	PREDICTED: (-)-germacrene D synthase-like isoform X2 [Fragaria vesca subsp. vesca]	2.27857	0.00232051	0.0059498	yes	up
maker-Fvb5-1-augustus-gene-128.43	PREDICTED: serine/threonine-protein kinase SAPK2-like [Fragaria vesca subsp. vesca]	-1.62803	8.23199e-53	2.61988e-51	yes	down		maker-Fvb7-2-augustus-gene-140.42	PREDICTED: 3-phosphoinositide-dependent protein kinase 2 [Fragaria vesca subsp. vesca]	1.2633	3.5274e-25	4.66614e-24	yes	up
maker-Fvb6-3-snap-gene-260.37	PREDICTED: uncharacterized protein LOC101293610 isoform X1 [Fragaria vesca subsp. vesca]	-1.98223	2.13076e-166	4.10857e-164	yes	down		maker-Fvb6-4-snap-gene-120.37	PREDICTED: protein SHOOT GRAVITROPISM 6 isoform X1 [Fragaria vesca subsp. vesca]	1.28434	1.89736e-58	6.95819e-57	yes	up
maker-Fvb4-3-augustus-gene-62.49	PREDICTED: pirin-like protein [Fragaria vesca subsp. vesca]	-1.21557	2.96227e-15	2.4022e-14	yes	down		maker-Fvb6-1-augustus-gene-319.53	PREDICTED: uncharacterized protein LOC101293694 isoform X2 [Fragaria vesca subsp. vesca]	1.25908	1.37428e-17	1.27356e-16	yes	up
maker-Fvb5-3-augustus-gene-119.32	PREDICTED: HMG1/2-like protein [Fragaria vesca subsp. vesca]	-1.39669	6.68538e-57	2.36316e-55	yes	down		maker-Fvb7-3-snap-gene-235.60	PREDICTED: peptidyl-prolyl cis-trans isomerase FKBP42 [Fragaria vesca subsp. vesca]	1.09596	1.26885e-09	6.89048e-09	yes	up
snap_masked-Fvb6-1-processed-gene-94.16	PREDICTED: protein trichome birefringence-like 43 [Fragaria vesca subsp. vesca]	-2.01793	4.76236e-07	2.02892e-06	yes	down		maker-Fvb7-2-augustus-gene-151.17	PREDICTED: replication protein A 70 kDa DNA-binding subunit B-like [Fragaria vesca subsp. vesca]	3.04025	5.56884e-17	5.00098e-16	yes	up
MSTRG.18445	PREDICTED: uncharacterized protein LOC101309135 [Fragaria vesca subsp. vesca]	-1.95303	9.16639e-116	9.24439e-114	yes	down		maker-Fvb3-4-augustus-gene-259.42	PREDICTED: uncharacterized protein LOC101309131 [Fragaria vesca subsp. vesca]	1.05389	6.03936e-16	5.11065e-15	yes	up
MSTRG.47807	PREDICTED: sodium/hydrogen exchanger 1-like [Fragaria vesca subsp. vesca]	-1.12494	2.26701e-12	1.52287e-11	yes	down		maker-Fvb4-2-augustus-gene-202.17	PREDICTED: calcium-transporting ATPase 10, plasma membrane-type-like isoform X3 [Fragaria vesca subsp. vesca]	1.27114	3.26287e-29	5.12039e-28	yes	up
augustus_masked-Fvb6-4-processed-gene-102.12	PREDICTED: protein SLOW GREEN 1, chloroplastic [Fragaria vesca subsp. vesca]	-1.14101	5.58388e-09	2.8687e-08	yes	down		MSTRG.9764	PREDICTED: ethylene-responsive transcription factor RAP2-1-like [Fragaria vesca subsp. vesca]	1.0602	9.16343e-16	7.67802e-15	yes	up
maker-Fvb7-4-augustus-gene-112.35	PREDICTED: U-box domain-containing protein 33 isoform X2 [Fragaria vesca subsp. vesca]	-1.17308	4.46068e-29	6.96445e-28	yes	down		augustus_masked-Fvb7-3-processed-gene-109.12	PREDICTED: BON1-associated protein 2 isoform X1 [Fragaria vesca subsp. vesca]	1.00304	0.00205442	0.0053139	yes	up
maker-Fvb7-1-augustus-gene-124.24	PREDICTED: protein ECERIFERUM 1-like [Fragaria vesca subsp. vesca]	-1.90945	3.33081e-23	4.05231e-22	yes	down		maker-Fvb2-4-augustus-gene-245.55	PREDICTED: suppressor protein SRP40-like [Fragaria vesca subsp. vesca]	1.95322	4.90504e-86	3.1395e-84	yes	up
maker-Fvb6-2-augustus-gene-146.23	PREDICTED: protein trichome birefringence-like 8 [Fragaria vesca subsp. vesca]	-2.42796	7.36663e-17	6.57308e-16	yes	down		maker-Fvb7-4-augustus-gene-151.36	PREDICTED: probable mediator of RNA polymerase II transcription subunit 37c [Fragaria vesca subsp. vesca]	1.40772	2.50829e-18	2.41776e-17	yes	up
augustus_masked-Fvb5-3-processed-gene-197.10	PREDICTED: malate dehydrogenase, chloroplastic [Fragaria vesca subsp. vesca]	-1.66054	1.17324e-97	9.04526e-96	yes	down		maker-Fvb6-1-snap-gene-130.43	PREDICTED: phospholipase D epsilon [Fragaria vesca subsp. vesca]	1.51268	1.89566e-15	1.55758e-14	yes	up
augustus_masked-Fvb2-4-processed-gene-81.4	PREDICTED: leucine-rich repeat extensin-like protein 1 [Fragaria vesca subsp. vesca]	-1.52177	7.63593e-08	3.52961e-07	yes	down		maker-Fvb2-1-augustus-gene-183.47	PREDICTED: endoglucanase 17 [Fragaria vesca subsp. vesca]	2.81772	0.000890724	0.00246037	yes	up
maker-Fvb1-4-snap-gene-14.89	PREDICTED: SPX domain-containing protein 1-like [Fragaria vesca subsp. vesca]	-1.07351	2.6661e-06	1.04593e-05	yes	down		maker-Fvb2-4-augustus-gene-126.31	PREDICTED: MATE efflux family protein 3, chloroplastic isoform X2 [Fragaria vesca subsp. vesca]	1.13937	2.86552e-07	1.24933e-06	yes	up
maker-Fvb4-3-augustus-gene-146.34	PREDICTED: probable aldo-keto reductase 2 [Fragaria vesca subsp. vesca]	-1.00946	2.6732e-31	4.54641e-30	yes	down		MSTRG.53001	PREDICTED: uncharacterized protein LOC101299504 [Fragaria vesca subsp. vesca]	1.4572	0.00306875	0.00769372	yes	up
maker-Fvb2-3-augustus-gene-44.63	PREDICTED: 1,4-alpha-glucan-branching enzyme 1, chloroplastic/amyloplastic-like [Fragaria vesca subsp. vesca]	-1.34965	1.60782e-55	5.48722e-54	yes	down		maker-Fvb7-3-augustus-gene-184.40	PREDICTED: probable receptor-like protein kinase At1g67000 [Fragaria vesca subsp. vesca]	1.55137	1.16386e-07	5.27354e-07	yes	up
maker-Fvb1-3-augustus-gene-22.52	PREDICTED: uncharacterized protein LOC101299224 [Fragaria vesca subsp. vesca]	-1.01577	8.72172e-29	1.34686e-27	yes	down		maker-Fvb6-2-snap-gene-345.66	PREDICTED: cyclic nucleotide-gated ion channel 1-like [Fragaria vesca subsp. vesca]	1.86796	2.98642e-191	7.36405e-189	yes	up
MSTRG.66723	PREDICTED: MADS-box protein SOC1-like isoform X1 [Fragaria vesca subsp. vesca]	-1.13474	2.52358e-41	5.88214e-40	yes	down		maker-Fvb3-1-augustus-gene-221.43	PREDICTED: protein SRG1-like [Fragaria vesca subsp. vesca]	1.52866	5.44898e-49	1.56863e-47	yes	up
augustus_masked-Fvb7-3-processed-gene-86.9	PREDICTED: adenosine kinase 2-like [Fragaria vesca subsp. vesca]	-1.02335	1.08409e-16	9.57556e-16	yes	down		maker-Fvb1-1-snap-gene-247.56	PREDICTED: uncharacterized protein LOC101296224 [Fragaria vesca subsp. vesca]	1.00005	0.00768758	0.0177808	yes	up
maker-Fvb5-1-augustus-gene-36.57	PREDICTED: probable inactive receptor kinase At2g26730 [Fragaria vesca subsp. vesca]	-1.52399	0.000859353	0.00238086	yes	down		augustus_masked-Fvb5-4-processed-gene-47.3	PREDICTED: magnesium protoporphyrin IX methyltransferase, chloroplastic [Fragaria vesca subsp. vesca]	1.52288	1.38511e-12	9.4333e-12	yes	up
maker-Fvb1-1-snap-gene-221.77	PREDICTED: uncharacterized protein LOC101294893 [Fragaria vesca subsp. vesca]	-1.05338	2.44908e-41	5.71138e-40	yes	down		maker-Fvb4-4-snap-gene-138.30	PREDICTED: ubiquitin-conjugating enzyme E2 11-like [Fragaria vesca subsp. vesca]	1.27134	0.00479845	0.0115604	yes	up
augustus_masked-Fvb2-3-processed-gene-86.5	PREDICTED: zinc finger protein CONSTANS-LIKE 13 [Fragaria vesca subsp. vesca]	-1.45557	1.17108e-111	1.12317e-109	yes	down		maker-Fvb3-4-augustus-gene-130.7	PREDICTED: uncharacterized protein LOC101310447 isoform X3 [Fragaria vesca subsp. vesca]	1.53325	1.0705e-15	8.93311e-15	yes	up
maker-Fvb5-4-augustus-gene-31.38	PREDICTED: triose phosphate/phosphate translocator, non-green plastid, chloroplastic [Fragaria vesca subsp. vesca]	-1.30489	1.80864e-40	4.1166e-39	yes	down		maker-Fvb6-2-augustus-gene-305.59	hypothetical protein RchiOBHm_Chr2g0167761 [Rosa chinensis]	1.00531	1.63729e-06	6.56572e-06	yes	up
maker-Fvb1-4-augustus-gene-121.53	PREDICTED: uncharacterized protein LOC101303450 [Fragaria vesca subsp. vesca]	-1.43096	3.10818e-43	7.68282e-42	yes	down		augustus_masked-Fvb1-3-processed-gene-5.16	PREDICTED: heat shock 70 kDa protein [Fragaria vesca subsp. vesca]	3.24336	3.15146e-36	6.26826e-35	yes	up
maker-Fvb3-2-snap-gene-276.36	PREDICTED: subtilisin-like protease [Fragaria vesca subsp. vesca]	-1.19549	0.0143704	0.0312466	yes	down		maker-Fvb6-3-augustus-gene-0.35	PREDICTED: F-box/FBD/LRR-repeat protein At1g13570-like [Fragaria vesca subsp. vesca]	2.31171	0.000612641	0.00173888	yes	up
MSTRG.34292	PREDICTED: LOW QUALITY PROTEIN: ribonucleoside-diphosphate reductase small chain A [Fragaria vesca subsp. vesca]	-1.15089	1.82717e-22	2.15761e-21	yes	down		maker-Fvb1-3-snap-gene-188.36	hypothetical protein RchiOBHm_Chr2g0123881 [Rosa chinensis]	3.67424	2.82425e-08	1.3586e-07	yes	up
MSTRG.49431	putative downF0014 family protein [Rosa chinensis]	-1.1841	1.63509e-13	1.19064e-12	yes	down		maker-Fvb6-1-augustus-gene-117.45	PREDICTED: linoleate 13S-lipoxygenase 3-1, chloroplastic-like [Fragaria vesca subsp. vesca]	1.55471	3.15717e-51	9.68269e-50	yes	up
snap_masked-Fvb3-2-processed-gene-97.24	PREDICTED: cytochrome P450 72A15-like [Fragaria vesca subsp. vesca]	-1.36016	2.1728e-102	1.81678e-100	yes	down		MSTRG.18939	PREDICTED: protein SMG7L [Fragaria vesca subsp. vesca]	1.73989	1.49403e-19	1.53263e-18	yes	up
maker-Fvb4-3-augustus-gene-145.35	PREDICTED: LOW QUALITY PROTEIN: serine/threonine-protein kinase ULK4-like [Fragaria vesca subsp. vesca]	-1.00436	5.51205e-09	2.83274e-08	yes	down		maker-Fvb6-2-augustus-gene-106.26	PREDICTED: uncharacterized protein LOC105351660 [Fragaria vesca subsp. vesca]	1.95148	8.32099e-21	9.08298e-20	yes	up
maker-Fvb2-2-augustus-gene-212.31	PREDICTED: serine carboxypeptidase-like 18 [Fragaria vesca subsp. vesca]	-1.29971	2.77649e-14	2.12084e-13	yes	down		MSTRG.14004	PREDICTED: UPF0496 protein 4 [Fragaria vesca subsp. vesca]	1.29478	6.14215e-33	1.10101e-31	yes	up
maker-Fvb5-2-snap-gene-52.64	PREDICTED: uncharacterized protein At4g14100-like [Fragaria vesca subsp. vesca]	-1.4526	5.73542e-07	2.42215e-06	yes	down		maker-Fvb1-4-snap-gene-203.11	PREDICTED: cytochrome c biogenesis protein CCS1, chloroplastic [Fragaria vesca subsp. vesca]	1.96032	4.12665e-55	1.39541e-53	yes	up
maker-Fvb4-4-augustus-gene-44.42	PREDICTED: transcription factor bHLH30 [Fragaria vesca subsp. vesca]	-1.13875	4.6229e-05	0.00015567	yes	down		maker-Fvb1-3-augustus-gene-30.62	PREDICTED: inositol oxygenase 4 [Fragaria vesca subsp. vesca]	7.2989	1.99848e-08	9.74304e-08	yes	up
maker-Fvb6-4-snap-gene-106.49	PREDICTED: L-ascorbate peroxidase 2, cytosolic-like [Fragaria vesca subsp. vesca]	-1.55249	0.000638243	0.00180514	yes	down		MSTRG.55493	PREDICTED: zinc finger protein CONSTANS-LIKE 14-like [Fragaria vesca subsp. vesca]	1.88688	3.41759e-13	2.43087e-12	yes	up
maker-Fvb6-4-augustus-gene-180.29	glucan endo-1,3-beta-glucosidase, basic isoform-like [Rosa chinensis]	-1.36749	9.59601e-12	6.15054e-11	yes	down		maker-Fvb6-2-augustus-gene-94.35	PREDICTED: AP2-like ethylene-responsive transcription factor At1g16060 [Fragaria vesca subsp. vesca]	1.59022	0.00132267	0.00354325	yes	up
maker-Fvb7-1-augustus-gene-290.59	PREDICTED: beta-carotene hydroxylase 2, chloroplastic-like [Fragaria vesca subsp. vesca]	-1.64724	5.5007e-58	1.99894e-56	yes	down		maker-Fvb2-3-snap-gene-239.69	PREDICTED: LOW QUALITY PROTEIN: ATP-dependent Clp protease ATP-binding subunit clpX-like, mitochondrial [Fragaria vesca subsp. vesca]	1.38065	8.33995e-08	3.84171e-07	yes	up
maker-Fvb6-4-augustus-gene-300.43	PREDICTED: glucose-6-phosphate 1-dehydrogenase, chloroplastic [Fragaria vesca subsp. vesca]	-1.48346	9.99633e-35	1.88484e-33	yes	down		augustus_masked-Fvb6-2-processed-gene-298.13	PREDICTED: protein CREG1 [Fragaria vesca subsp. vesca]	1.86547	1.85968e-30	3.07084e-29	yes	up
maker-Fvb6-2-snap-gene-253.79	PREDICTED: WD repeat-containing protein 48 [Fragaria vesca subsp. vesca]	-1.69891	2.57379e-121	2.78175e-119	yes	down		MSTRG.53040	PREDICTED: 2-phytyl-1,4-beta-naphthoquinone methyltransferase, chloroplastic-like isoform X2 [Fragaria vesca subsp. vesca]	1.33571	2.39251e-40	5.42137e-39	yes	up
MSTRG.39529	PREDICTED: MLO-like protein 4 [Fragaria vesca subsp. vesca]	-1.01945	1.16481e-31	2.00739e-30	yes	down		maker-Fvb3-4-augustus-gene-8.46	PREDICTED: feruloyl CoA ortho-hydroxylase 1 [Fragaria vesca subsp. vesca]	1.43503	4.09026e-07	1.75576e-06	yes	up
maker-Fvb7-1-augustus-gene-223.29	transcriptional activator Myb [Fragaria vesca]	-1.60722	1.67839e-09	9.01335e-09	yes	down		maker-Fvb7-1-augustus-gene-230.28	PREDICTED: protein arv1 homolog isoform X1 [Fragaria vesca subsp. vesca]	1.81691	1.03794e-09	5.6808e-09	yes	up
maker-Fvb6-4-augustus-gene-210.53	PREDICTED: uncharacterized protein LOC101314294 [Fragaria vesca subsp. vesca]	-1.08027	1.52935e-10	8.94974e-10	yes	down		maker-Fvb2-4-augustus-gene-235.53	PREDICTED: B3 domain-containing protein At5g42700-like [Fragaria vesca subsp. vesca]	2.77569	0.00196745	0.00510877	yes	up
augustus_masked-Fvb4-4-processed-gene-2.3	PREDICTED: DNA-damage-repair/toleration protein DRT100 [Fragaria vesca subsp. vesca]	-1.70713	0.019537	0.0411499	yes	down		snap_masked-Fvb2-4-processed-gene-237.19	PREDICTED: uncharacterized protein LOC101296545 [Fragaria vesca subsp. vesca]	1.00228	3.50594e-23	4.26087e-22	yes	up
maker-Fvb1-1-snap-gene-183.40	cytochrome P450 81E8-like [Rosa chinensis]	-2.02939	2.65285e-17	2.42664e-16	yes	down		maker-Fvb6-1-augustus-gene-265.37	PREDICTED: F-box protein At2g39490-like [Fragaria vesca subsp. vesca]	1.6592	0.000175136	0.000541601	yes	up
snap_masked-Fvb3-4-processed-gene-53.33	PREDICTED: alpha-glucan phosphorylase, H isozyme [Fragaria vesca subsp. vesca]	-3.25366	0	0	yes	down		maker-Fvb5-1-snap-gene-268.62	PREDICTED: protein ASPARTIC PROTEASE IN GUARD CELL 2 [Fragaria vesca subsp. vesca]	2.39139	0.000490171	0.00141468	yes	up
maker-Fvb1-1-augustus-gene-233.53	PREDICTED: uncharacterized protein LOC101302689 [Fragaria vesca subsp. vesca]	-1.39813	8.71103e-52	2.70039e-50	yes	down		augustus_masked-Fvb3-4-processed-gene-211.5	disease resistance protein RPM1-like [Rosa chinensis]	2.75848	3.06741e-17	2.79584e-16	yes	up
maker-Fvb2-3-snap-gene-189.50	PREDICTED: protein DJ-1 homolog C [Fragaria vesca subsp. vesca]	-1.10573	3.61472e-10	2.05315e-09	yes	down		maker-Fvb4-1-snap-gene-143.42	PREDICTED: uncharacterized protein LOC101303334 [Fragaria vesca subsp. vesca]	1.18356	4.90065e-06	1.86419e-05	yes	up
maker-Fvb3-4-augustus-gene-50.57	protein DAMAGED DNA-BINDING 2 [Rosa chinensis]	-2.23444	4.77141e-89	3.194e-87	yes	down		augustus_masked-Fvb4-4-processed-gene-14.6	transcription factor bHLH150 [Rosa chinensis]	2.61868	5.29646e-20	5.53954e-19	yes	up
maker-Fvb6-2-augustus-gene-357.33	phytoene synthase protein [Fragaria x ananassa]	-1.05437	1.07399e-51	3.3215e-50	yes	down		maker-Fvb1-2-augustus-gene-89.33	PREDICTED: probable small nuclear ribonucleoprotein Sm D2 isoform X2 [Fragaria vesca subsp. vesca]	2.18378	0.00150656	0.00399409	yes	up
maker-Fvb2-3-snap-gene-157.38	PREDICTED: tRNA-dihydrouridine(47) synthase [NAD(P)(+)]-like [Fragaria vesca subsp. vesca]	-1.14343	1.18995e-23	1.47284e-22	yes	down		maker-Fvb3-4-snap-gene-74.40	PREDICTED: 18.1 kDa class I heat shock protein-like [Fragaria vesca subsp. vesca]	5.99288	2.21215e-10	1.27748e-09	yes	up
snap_masked-Fvb6-4-processed-gene-114.29	PREDICTED: UDP-glycosyltransferase 86A1-like [Fragaria vesca subsp. vesca]	-1.54016	1.32836e-17	1.23175e-16	yes	down		augustus_masked-Fvb6-1-processed-gene-73.12	PREDICTED: receptor-like protein 12 [Fragaria vesca subsp. vesca]	1.31139	0.000659365	0.00185973	yes	up
maker-Fvb4-3-snap-gene-7.52	PREDICTED: probable potassium transporter 17 [Fragaria vesca subsp. vesca]	-1.48127	3.25928e-06	1.26766e-05	yes	down		maker-Fvb1-3-augustus-gene-24.33	PREDICTED: aldehyde dehydrogenase family 2 member C4-like [Fragaria vesca subsp. vesca]	1.36189	7.06894e-14	5.26541e-13	yes	up
maker-Fvb6-3-snap-gene-373.52	PREDICTED: transcription factor bHLH147-like [Fragaria vesca subsp. vesca]	-2.88105	2.96445e-174	6.31154e-172	yes	down		maker-Fvb7-2-augustus-gene-307.47	PREDICTED: gibberellin 20 oxidase 1 [Fragaria vesca subsp. vesca]	3.86448	1.12819e-42	2.74659e-41	yes	up
maker-Fvb1-2-snap-gene-216.27	PREDICTED: glutathione S-transferase F11-like [Fragaria vesca subsp. vesca]	-4.3064	0.00424133	0.0103311	yes	down		MSTRG.40318	leucine-rich repeat extensin-like protein 4 isoform X1 [Prunus persica]	1.33221	8.5887e-16	7.2063e-15	yes	up
MSTRG.14814	PREDICTED: phytosulfokines-like [Fragaria vesca subsp. vesca]	-1.8483	4.60093e-20	4.82911e-19	yes	down		snap_masked-Fvb7-2-processed-gene-111.25	PREDICTED: BON1-associated protein 1 [Fragaria vesca subsp. vesca]	2.68337	0.000110122	0.000351064	yes	up
MSTRG.52642	PREDICTED: aspartate, glycine, lysine and serine-rich protein-like [Fragaria vesca subsp. vesca]	-1.06738	3.43487e-57	1.22452e-55	yes	down		maker-Fvb2-4-augustus-gene-83.28	PREDICTED: putative glutamine amidotransferase YLR126C [Fragaria vesca subsp. vesca]	2.64686	1.22219e-08	6.07832e-08	yes	up
snap_masked-Fvb6-1-processed-gene-297.46	putative ATP synthase CFi alpha subunit, partial [Prunus dulcis]	-1.79337	7.83755e-09	3.97457e-08	yes	down		snap_masked-Fvb6-4-processed-gene-168.14	PREDICTED: cleavage stimulating factor 64-like [Fragaria vesca subsp. vesca]	2.29536	1.01891e-18	1.00155e-17	yes	up
maker-Fvb3-1-augustus-gene-305.40	PREDICTED: uncharacterized protein LOC101295676 [Fragaria vesca subsp. vesca]	-1.41097	0.000271551	0.000815869	yes	down		MSTRG.50194	replication protein A 70 kDa DNA-binding subunit B-like isoform X1 [Rosa chinensis]	1.01813	1.26676e-07	5.72258e-07	yes	up
maker-Fvb4-3-augustus-gene-122.25	hypothetical protein RchiOBHm_Chr4g0426141 [Rosa chinensis]	-1.51117	1.6684e-11	1.04896e-10	yes	down		maker-Fvb2-2-snap-gene-52.67	PREDICTED: uncharacterized protein LOC101297991 [Fragaria vesca subsp. vesca]	1.0616	0.0017552	0.00459902	yes	up
maker-Fvb3-3-augustus-gene-221.30	cytosolic ascorbate peroxidase [Fragaria x ananassa]	-2.6887	0	0	yes	down		MSTRG.7706	PREDICTED: LOW QUALITY PROTEIN: probable isoleucine--tRNA ligase, cytoplasmic [Fragaria vesca subsp. vesca]	1.0899	6.4336e-08	2.99477e-07	yes	up
maker-Fvb5-3-augustus-gene-230.39	PREDICTED: uncharacterized protein LOC101314850 [Fragaria vesca subsp. vesca]	-1.027	1.40463e-12	9.56271e-12	yes	down		maker-Fvb6-4-snap-gene-0.63	PREDICTED: TMV resistance protein N-like [Fragaria vesca subsp. vesca]	1.94188	0.000871364	0.00241145	yes	up
augustus_masked-Fvb4-4-processed-gene-45.8	PREDICTED: protein ASPARTIC PROTEASE IN GUARD CELL 1 [Fragaria vesca subsp. vesca]	-1.09648	2.74145e-06	1.07434e-05	yes	down		maker-Fvb5-1-snap-gene-118.44	PREDICTED: DNA mismatch repair protein MSH4 [Fragaria vesca subsp. vesca]	1.23418	9.43083e-19	9.28605e-18	yes	up
augustus_masked-Fvb7-3-processed-gene-58.0	PREDICTED: ferritin-4, chloroplastic [Fragaria vesca subsp. vesca]	-1.19429	4.88973e-66	2.10256e-64	yes	down		snap_masked-Fvb6-1-processed-gene-329.19	PREDICTED: uncharacterized protein LOC101291377 [Fragaria vesca subsp. vesca]	1.66842	1.25276e-19	1.28958e-18	yes	up
MSTRG.22843	PREDICTED: ubiquitin carboxyl-terminal hydrolase 15 isoform X1 [Fragaria vesca subsp. vesca]	-1.48203	1.8815e-96	1.41383e-94	yes	down		maker-Fvb2-1-snap-gene-246.93	PREDICTED: uncharacterized protein LOC101296167 [Fragaria vesca subsp. vesca]	1.28704	8.96334e-13	6.18928e-12	yes	up
maker-Fvb2-1-augustus-gene-137.32	PREDICTED: serine/threonine-protein kinase 38-like [Fragaria vesca subsp. vesca]	-1.27715	3.36944e-36	6.69347e-35	yes	down		augustus_masked-Fvb3-2-processed-gene-138.0	PREDICTED: uncharacterized protein LOC101303307 [Fragaria vesca subsp. vesca]	1.15726	1.93488e-08	9.44299e-08	yes	up
maker-Fvb2-2-snap-gene-89.58	PREDICTED: putative quinone-oxidoreductase homolog, chloroplastic [Fragaria vesca subsp. vesca]	-2.8473	2.29406e-285	1.54014e-282	yes	down		maker-Fvb4-3-augustus-gene-23.41	PREDICTED: probable xyloglucan endotransglucosylase/hydrolase protein 28 [Fragaria vesca subsp. vesca]	1.12473	5.84691e-67	2.56083e-65	yes	up
maker-Fvb4-3-augustus-gene-286.43	PREDICTED: uncharacterized protein LOC105350967 [Fragaria vesca subsp. vesca]	-1.07157	0.00397168	0.00973455	yes	down		augustus_masked-Fvb7-2-processed-gene-38.1	PREDICTED: probable carboxylesterase 15 [Fragaria vesca subsp. vesca]	3.46419	0.00203716	0.00527388	yes	up
MSTRG.16151	PREDICTED: pentatricopeptide repeat-containing protein At4g08210 [Fragaria vesca subsp. vesca]	-1.34168	1.6306e-25	2.19039e-24	yes	down		maker-Fvb7-2-snap-gene-42.64	uncharacterized protein LOC112203252 [Rosa chinensis]	1.2741	0.00423877	0.0103256	yes	up
maker-Fvb1-2-snap-gene-60.100	PREDICTED: thiol protease aleurain-like [Fragaria vesca subsp. vesca]	-1.59012	8.24328e-168	1.62005e-165	yes	down		augustus_masked-Fvb6-3-processed-gene-9.5	PREDICTED: uncharacterized protein LOC105352535 [Fragaria vesca subsp. vesca]	1.64611	1.17419e-05	4.26529e-05	yes	up
maker-Fvb5-4-augustus-gene-48.73	PREDICTED: succinate dehydrogenase assembly factor 2, mitochondrial [Fragaria vesca subsp. vesca]	-2.16431	3.86608e-94	2.81541e-92	yes	down		maker-Fvb1-4-augustus-gene-70.33	PREDICTED: BTB/POZ domain-containing protein At3g50780 [Fragaria vesca subsp. vesca]	1.06879	1.56731e-15	1.29426e-14	yes	up
maker-Fvb3-3-augustus-gene-243.47	PREDICTED: methylsterol monooxygenase 2-2 isoform X1 [Fragaria vesca subsp. vesca]	-2.35647	5.91318e-100	4.7252e-98	yes	down		maker-Fvb6-3-augustus-gene-423.37	PREDICTED: U-box domain-containing protein 9-like [Fragaria vesca subsp. vesca]	1.80143	1.64324e-07	7.32154e-07	yes	up
maker-Fvb5-3-augustus-gene-25.38	PREDICTED: 14-3-3 protein 7-like [Fragaria vesca subsp. vesca]	-2.09553	1.14767e-167	2.24591e-165	yes	down		augustus_masked-Fvb5-1-processed-gene-209.3	PREDICTED: xyloglucan galactosyltransferase KATAMARI1-like [Fragaria vesca subsp. vesca]	1.56605	8.73674e-101	7.10496e-99	yes	up
maker-Fvb1-2-augustus-gene-81.52	PREDICTED: CDK5RAP1-like protein [Fragaria vesca subsp. vesca]	-1.17385	1.16786e-26	1.64419e-25	yes	down		augustus_masked-Fvb6-2-processed-gene-233.13	PREDICTED: kinesin-4-like isoform X1 [Fragaria vesca subsp. vesca]	1.9319	0.0135702	0.0296744	yes	up
augustus_masked-Fvb7-3-processed-gene-35.3	putative LysM domain-containing protein [Rosa chinensis]	-2.0988	1.42847e-05	5.13525e-05	yes	down		snap_masked-Fvb4-3-processed-gene-44.36	PREDICTED: protein STRICTOSIDINE SYNTHASE-LIKE 10-like [Fragaria vesca subsp. vesca]	4.4471	3.6329e-101	2.98073e-99	yes	up
maker-Fvb5-1-augustus-gene-162.29	PREDICTED: ubiquinol oxidase 2, mitochondrial [Fragaria vesca subsp. vesca]	-1.58309	5.82657e-15	4.64389e-14	yes	down		maker-Fvb5-3-augustus-gene-258.33	PREDICTED: uncharacterized protein LOC101313411 [Fragaria vesca subsp. vesca]	1.26896	2.75683e-19	2.79039e-18	yes	up
maker-Fvb2-4-augustus-gene-197.38	PREDICTED: two-component response regulator ARR8-like [Fragaria vesca subsp. vesca]	-2.36242	2.45591e-30	4.03582e-29	yes	down		maker-Fvb6-4-snap-gene-62.48	PREDICTED: phospholipase A-2-activating protein [Fragaria vesca subsp. vesca]	1.45052	0.000449573	0.00130536	yes	up
snap_masked-Fvb6-4-processed-gene-277.20	PREDICTED: B-box zinc finger protein 32 [Fragaria vesca subsp. vesca]	-4.47722	0.0239983	0.04933	yes	down		maker-Fvb5-3-augustus-gene-98.33	PREDICTED: uncharacterized protein LOC105349343 [Fragaria vesca subsp. vesca]	1.49975	1.29695e-08	6.43028e-08	yes	up
augustus_masked-Fvb4-2-processed-gene-49.5	PREDICTED: E3 ubiquitin-protein ligase RHA2A [Fragaria vesca subsp. vesca]	-1.30018	4.20189e-09	2.18445e-08	yes	down		maker-Fvb7-3-snap-gene-139.35	PREDICTED: probable pectinesterase/pectinesterase inhibitor 17 [Fragaria vesca subsp. vesca]	2.11543	0.0137133	0.0299524	yes	up
maker-Fvb2-4-augustus-gene-257.38	PREDICTED: uncharacterized protein LOC101304060 isoform X1 [Fragaria vesca subsp. vesca]	-1.00031	8.94598e-24	1.11327e-22	yes	down		augustus_masked-Fvb4-1-processed-gene-21.5	PREDICTED: ethylene-responsive transcription factor ERF096-like [Fragaria vesca subsp. vesca]	4.97793	0.00209474	0.00540908	yes	up
maker-Fvb2-2-augustus-gene-213.29	PREDICTED: serine carboxypeptidase-like 17 [Fragaria vesca subsp. vesca]	-2.34791	8.3812e-62	3.31985e-60	yes	down		MSTRG.10766	SNARE-interacting protein KEULE-like [Rosa chinensis]	1.41927	1.43917e-27	2.10946e-26	yes	up
maker-Fvb2-2-snap-gene-160.47	PREDICTED: probable DNA helicase MCM9 [Fragaria vesca subsp. vesca]	-1.17396	5.52337e-09	2.8384e-08	yes	down		maker-Fvb5-4-snap-gene-223.23	uncharacterized protein LOC112171416 [Rosa chinensis]	1.5574	1.13373e-06	4.63037e-06	yes	up
augustus_masked-Fvb5-2-processed-gene-116.0	PREDICTED: phospholipase A1-Ibeta2, chloroplastic [Fragaria vesca subsp. vesca]	-1.12225	5.74494e-15	4.58081e-14	yes	down		augustus_masked-Fvb3-4-processed-gene-149.4	PREDICTED: elongator complex protein 3 [Fragaria vesca subsp. vesca]	1.36992	1.131e-27	1.66653e-26	yes	up
maker-Fvb5-2-augustus-gene-47.47	PREDICTED: HVA22-like protein e [Fragaria vesca subsp. vesca]	-1.63861	3.00423e-84	1.85199e-82	yes	down		MSTRG.8667	PREDICTED: uncharacterized protein LOC101304541 [Fragaria vesca subsp. vesca]	1.32664	2.43236e-19	2.46958e-18	yes	up
maker-Fvb5-1-snap-gene-289.48	PREDICTED: uncharacterized protein LOC101305673 [Fragaria vesca subsp. vesca]	-1.22713	6.48871e-21	7.12179e-20	yes	down		MSTRG.28730	PREDICTED: uncharacterized protein LOC101309444 [Fragaria vesca subsp. vesca]	2.01803	1.02564e-59	3.88367e-58	yes	up
augustus_masked-Fvb4-1-processed-gene-113.4	PREDICTED: uncharacterized protein LOC101305932 [Fragaria vesca subsp. vesca]	-2.21062	2.28807e-25	3.05129e-24	yes	down		MSTRG.46449	putative transcription factor MADS-type1 family [Rosa chinensis]	2.7109	0.00299548	0.00752253	yes	up
maker-Fvb7-3-augustus-gene-169.47	PREDICTED: ent-kaurenoic acid oxidase 1-like [Fragaria vesca subsp. vesca]	-1.4306	9.50292e-05	0.000306297	yes	down		maker-Fvb3-3-snap-gene-52.32	PREDICTED: NAC domain-containing protein 21/22-like isoform X1 [Fragaria vesca subsp. vesca]	1.81593	9.96163e-05	0.000319913	yes	up
maker-Fvb6-1-augustus-gene-110.49	PREDICTED: alanine aminotransferase 2 [Fragaria vesca subsp. vesca]	-1.01743	3.68944e-20	3.88973e-19	yes	down		maker-Fvb1-1-augustus-gene-114.17	PREDICTED: chromatin assembly factor 1 subunit FAS2 isoform X1 [Fragaria vesca subsp. vesca]	3.57833	1.29746e-44	3.32596e-43	yes	up
maker-Fvb5-4-augustus-gene-55.62	PREDICTED: uncharacterized protein LOC101293946 [Fragaria vesca subsp. vesca]	-1.26549	8.255e-48	2.30989e-46	yes	down		maker-Fvb3-3-augustus-gene-52.28	PREDICTED: NAC domain-containing protein 21/22-like isoform X1 [Fragaria vesca subsp. vesca]	2.12687	0.000105817	0.000338372	yes	up
maker-Fvb5-1-augustus-gene-86.50	PREDICTED: protein SPIRAL1-like 2 [Fragaria vesca subsp. vesca]	-2.95623	3.42276e-149	5.34485e-147	yes	down		snap_masked-Fvb7-3-processed-gene-56.49	PREDICTED: sodium-coupled neutral amino acid transporter 5-like [Fragaria vesca subsp. vesca]	1.566	0.0135328	0.0296011	yes	up
maker-Fvb5-3-snap-gene-241.66	PREDICTED: ferric reduction oxidase 8, mitochondrial [Fragaria vesca subsp. vesca]	-1.13272	1.69678e-34	3.17718e-33	yes	down		MSTRG.7734	PREDICTED: uncharacterized protein LOC101296113 isoform X1 [Fragaria vesca subsp. vesca]	1.15648	1.64726e-07	7.33837e-07	yes	up
maker-Fvb3-2-augustus-gene-194.27	PREDICTED: MATE efflux family protein 1 [Fragaria vesca subsp. vesca]	-1.04651	0.0214429	0.0446844	yes	down		snap_masked-Fvb4-3-processed-gene-5.37	PREDICTED: eukaryotic translation initiation factor 5B-like [Fragaria vesca subsp. vesca]	1.33901	1.18377e-45	3.13139e-44	yes	up
maker-Fvb2-1-augustus-gene-133.31	PREDICTED: tyrosine decarboxylase 1 [Fragaria vesca subsp. vesca]	-1.41893	9.50161e-16	7.95413e-15	yes	down		augustus_masked-Fvb5-2-processed-gene-14.8	PREDICTED: BTB/POZ domain-containing protein At5g41330 [Fragaria vesca subsp. vesca]	2.19044	6.23869e-13	4.35001e-12	yes	up
maker-Fvb2-3-augustus-gene-239.62	PREDICTED: amino acid permease 4-like [Fragaria vesca subsp. vesca]	-1.36564	1.29526e-36	2.61084e-35	yes	down		maker-Fvb6-2-snap-gene-326.62	PREDICTED: myb-related protein Myb4-like [Fragaria vesca subsp. vesca]	3.17074	5.03406e-08	2.36787e-07	yes	up
maker-Fvb2-1-snap-gene-230.79	PREDICTED: oleosin 16 kDa-like [Fragaria vesca subsp. vesca]	-3.92162	0.0133382	0.0292197	yes	down		maker-Fvb5-2-augustus-gene-190.38	PREDICTED: pinin [Fragaria vesca subsp. vesca]	1.13117	1.87578e-40	4.26518e-39	yes	up
maker-Fvb7-3-augustus-gene-68.60	PREDICTED: folylpolyglutamate synthase [Fragaria vesca subsp. vesca]	-1.0908	3.00756e-38	6.35332e-37	yes	down		maker-Fvb5-4-snap-gene-161.29	PREDICTED: 60S ribosomal protein L32-1 [Fragaria vesca subsp. vesca]	1.07727	5.58324e-06	2.10806e-05	yes	up
maker-Fvb3-4-augustus-gene-139.23	protein STRICTOSIDINE SYNTHASE-LIKE 3 [Rosa chinensis]	-1.14676	4.26849e-30	6.95727e-29	yes	down		maker-Fvb7-3-augustus-gene-91.53	PREDICTED: NAC domain-containing protein 18-like [Fragaria vesca subsp. vesca]	1.85173	4.17e-16	3.5569e-15	yes	up
snap_masked-Fvb3-4-processed-gene-220.41	PREDICTED: protein NRT1/ PTR FAMILY 8.3-like [Fragaria vesca subsp. vesca]	-1.38149	7.30314e-104	6.32499e-102	yes	down		maker-Fvb4-3-augustus-gene-113.50	PREDICTED: probable 3-beta-hydroxysteroid-Delta(8),Delta(7)-isomerase [Fragaria vesca subsp. vesca]	1.43243	1.04677e-05	3.82602e-05	yes	up
maker-Fvb2-3-augustus-gene-117.39	PREDICTED: mechanosensitive ion channel protein 6-like [Fragaria vesca subsp. vesca]	-2.03948	4.96246e-09	2.56377e-08	yes	down		MSTRG.29573	PREDICTED: uncharacterized protein LOC101291512 [Fragaria vesca subsp. vesca]	1.55733	3.06837e-27	4.43249e-26	yes	up
MSTRG.63737	PREDICTED: uncharacterized protein LOC101298945 [Fragaria vesca subsp. vesca]	-7.64724	7.76156e-24	9.69152e-23	yes	down		MSTRG.24624	PREDICTED: uncharacterized protein LOC101293006 [Fragaria vesca subsp. vesca]	1.09637	1.24495e-36	2.51164e-35	yes	up
maker-Fvb5-4-snap-gene-123.49	PREDICTED: alpha/beta hydrolase domain-containing protein 17B [Fragaria vesca subsp. vesca]	-1.97767	0.0018535	0.00483322	yes	down		maker-Fvb7-2-snap-gene-300.53	PREDICTED: uncharacterized protein LOC101308624 [Fragaria vesca subsp. vesca]	1.35641	1.01065e-16	8.94145e-16	yes	up
maker-Fvb7-2-augustus-gene-0.18	PREDICTED: protein YLS3-like [Fragaria vesca subsp. vesca]	-2.54951	0.00289977	0.00730149	yes	down		MSTRG.14803	PREDICTED: squalene monooxygenase-like [Fragaria vesca subsp. vesca]	2.37566	1.23649e-53	4.02007e-52	yes	up
maker-Fvb2-4-snap-gene-232.59	PREDICTED: probable carbohydrate esterase At4g34215 [Fragaria vesca subsp. vesca]	-1.94287	2.51934e-84	1.5583e-82	yes	down		maker-Fvb4-2-augustus-gene-81.44	xyloglucan endotransglucosylase/hydrolase 1 [Fragaria x ananassa]	4.06314	1.11821e-107	1.02439e-105	yes	up
maker-Fvb5-1-snap-gene-296.59	PREDICTED: uncharacterized protein LOC101307212 [Fragaria vesca subsp. vesca]	-2.78346	3.69227e-08	1.75649e-07	yes	down		MSTRG.43883	receptor-like protein EIX2 isoform X1 [Rosa chinensis]	1.96683	2.21953e-19	2.25872e-18	yes	up
maker-Fvb1-3-snap-gene-21.75	PREDICTED: probable chlorophyll(ide) b reductase NYC1, chloroplastic [Fragaria vesca subsp. vesca]	-1.70843	4.81703e-190	1.16286e-187	yes	down		augustus_masked-Fvb4-2-processed-gene-54.8	PREDICTED: G-type lectin S-receptor-like serine/threonine-protein kinase RLK1 [Fragaria vesca subsp. vesca]	2.3428	0.00745574	0.0172959	yes	up
maker-Fvb3-3-augustus-gene-265.35	PREDICTED: trans-cinnamate 4-monooxygenase [Fragaria vesca subsp. vesca]	-2.65026	2.04595e-163	3.79392e-161	yes	down		augustus_masked-Fvb6-2-processed-gene-238.15	PREDICTED: receptor-like protein 12 isoform X3 [Fragaria vesca subsp. vesca]	1.33628	1.36563e-51	4.21495e-50	yes	up
maker-Fvb7-3-snap-gene-14.76	PREDICTED: topless-related protein 1-like isoform X3 [Fragaria vesca subsp. vesca]	-1.12669	8.46864e-28	1.25611e-26	yes	down		maker-Fvb2-4-snap-gene-137.46	probable LRR receptor-like serine/threonine-protein kinase At3g47570 isoform X2 [Rosa chinensis]	1.06022	1.73805e-14	1.34539e-13	yes	up
maker-Fvb2-1-augustus-gene-165.45	PREDICTED: ABC transporter C family member 14 [Fragaria vesca subsp. vesca]	-2.30919	2.84345e-280	1.86807e-277	yes	down		maker-Fvb5-1-augustus-gene-77.59	PREDICTED: uncharacterized protein LOC101313996 isoform X1 [Fragaria vesca subsp. vesca]	1.46806	0.00181836	0.00475008	yes	up
maker-Fvb2-1-augustus-gene-70.26	PREDICTED: laccase-14-like [Fragaria vesca subsp. vesca]	-2.99529	1.40788e-107	1.28719e-105	yes	down		maker-Fvb4-3-augustus-gene-20.43	PREDICTED: MACPF domain-containing protein At1g14780 [Fragaria vesca subsp. vesca]	2.21372	2.17146e-05	7.63492e-05	yes	up
maker-Fvb2-4-augustus-gene-139.31	PREDICTED: probable sodium/metabolite cotransporter BASS3, chloroplastic [Fragaria vesca subsp. vesca]	-1.09508	7.98995e-69	3.63444e-67	yes	down		maker-Fvb3-4-augustus-gene-274.35	PREDICTED: sugar carrier protein C [Fragaria vesca subsp. vesca]	1.78859	8.96488e-133	1.12953e-130	yes	up
augustus_masked-Fvb2-1-processed-gene-152.0	PREDICTED: uncharacterized protein LOC101299437 isoform X1 [Fragaria vesca subsp. vesca]	-1.59986	1.66518e-11	1.04708e-10	yes	down		augustus_masked-Fvb2-2-processed-gene-116.7	kinesin-like protein KIN-14I isoform X3 [Rosa chinensis]	2.10099	8.46932e-35	1.60151e-33	yes	up
snap_masked-Fvb6-2-processed-gene-135.34	PREDICTED: uncharacterized protein LOC101295551 [Fragaria vesca subsp. vesca]	-2.4742	0.000877292	0.00242647	yes	down		maker-Fvb4-3-snap-gene-270.25	PREDICTED: calcium-transporting ATPase 10, plasma membrane-type-like isoform X7 [Fragaria vesca subsp. vesca]	1.76579	4.50437e-156	7.6157e-154	yes	up
maker-Fvb1-2-augustus-gene-33.50	PREDICTED: probable chlorophyll(ide) b reductase NYC1, chloroplastic [Fragaria vesca subsp. vesca]	-1.9149	1.35221e-158	2.3378e-156	yes	down		maker-Fvb2-2-augustus-gene-128.24	PREDICTED: uncharacterized protein LOC101299897 isoform X2 [Fragaria vesca subsp. vesca]	4.2342	5.34275e-05	0.000178414	yes	up
maker-Fvb7-4-augustus-gene-29.38	PREDICTED: cytochrome P450 704C1-like isoform X2 [Fragaria vesca subsp. vesca]	-1.09382	4.4806e-05	0.000151182	yes	down		augustus_masked-Fvb2-2-processed-gene-172.6	PREDICTED: UPF0496 protein At4g34320-like [Fragaria vesca subsp. vesca]	2.36176	9.09767e-48	2.54105e-46	yes	up
maker-Fvb2-3-augustus-gene-157.19	PREDICTED: probable ribosome-binding factor A, chloroplastic [Fragaria vesca subsp. vesca]	-1.13636	1.21337e-20	1.31126e-19	yes	down		maker-Fvb1-3-snap-gene-101.55	PREDICTED: uncharacterized protein LOC101298218 [Fragaria vesca subsp. vesca]	1.22703	0.00328325	0.0081845	yes	up
snap_masked-Fvb6-4-processed-gene-279.11	PREDICTED: glucan endo-1,3-beta-glucosidase, basic isoform-like [Fragaria vesca subsp. vesca]	-1.7855	3.93127e-105	3.48682e-103	yes	down		snap_masked-Fvb5-1-processed-gene-165.19	--	1.69118	1.22813e-06	5.00016e-06	yes	up
MSTRG.13737	--	-1.61622	3.44087e-15	2.78051e-14	yes	down		augustus_masked-Fvb5-1-processed-gene-19.16	PREDICTED: uncharacterized protein LOC101296490 [Fragaria vesca subsp. vesca]	4.45677	0.0112356	0.0250536	yes	up
maker-Fvb6-1-augustus-gene-22.41	PREDICTED: uncharacterized protein LOC101300550 [Fragaria vesca subsp. vesca]	-2.0491	1.0896e-27	1.60811e-26	yes	down		snap_masked-Fvb6-3-processed-gene-151.12	PREDICTED: DNA topoisomerase 2 [Fragaria vesca subsp. vesca]	1.28412	2.18161e-27	3.17543e-26	yes	up
MSTRG.25728	--	-1.37892	9.31319e-07	3.84173e-06	yes	down		maker-Fvb5-3-snap-gene-267.35	PREDICTED: uncharacterized protein LOC101291925 [Fragaria vesca subsp. vesca]	1.23352	0.00139089	0.00371173	yes	up
augustus_masked-Fvb6-1-processed-gene-254.5	PREDICTED: transcription factor PCF1 [Fragaria vesca subsp. vesca]	-1.36387	0.00167686	0.00440912	yes	down		maker-Fvb3-1-augustus-gene-26.44	PREDICTED: GPI-anchored protein LORELEI [Fragaria vesca subsp. vesca]	1.09025	0.000258853	0.000780496	yes	up
maker-Fvb6-1-augustus-gene-287.47	PREDICTED: vacuolar cation/proton exchanger 3 [Fragaria vesca subsp. vesca]	-1.76242	5.18767e-85	3.25694e-83	yes	down		MSTRG.51797	PREDICTED: uncharacterized protein LOC101293803 [Fragaria vesca subsp. vesca]	2.16027	5.83893e-63	2.37419e-61	yes	up
augustus_masked-Fvb3-3-processed-gene-88.15	PREDICTED: uncharacterized protein LOC105350456 [Fragaria vesca subsp. vesca]	-1.26876	5.32696e-10	2.98352e-09	yes	down		maker-Fvb6-3-snap-gene-150.41	PREDICTED: palmitoyl-monogalactosyldiacylglycerol delta-7 desaturase, chloroplastic [Fragaria vesca subsp. vesca]	1.28412	2.18161e-27	3.17543e-26	yes	up
maker-Fvb4-3-augustus-gene-42.54	PREDICTED: uncharacterized protein LOC101299287 isoform X2 [Fragaria vesca subsp. vesca]	-1.15258	2.64896e-19	2.68179e-18	yes	down		maker-Fvb6-3-augustus-gene-171.20	PREDICTED: protein trichome birefringence-like 39 [Fragaria vesca subsp. vesca]	2.38293	1.04708e-06	4.29134e-06	yes	up
MSTRG.53803	PREDICTED: uncharacterized protein LOC101313816 [Fragaria vesca subsp. vesca]	-1.05995	2.33296e-43	5.78841e-42	yes	down		augustus_masked-Fvb3-3-processed-gene-134.6	PREDICTED: myosin-6 isoform X3 [Fragaria vesca subsp. vesca]	4.27583	9.26518e-09	4.66485e-08	yes	up
snap_masked-Fvb6-2-processed-gene-346.21	PREDICTED: glucose-6-phosphate 1-dehydrogenase, chloroplastic [Fragaria vesca subsp. vesca]	-2.41524	7.41869e-108	6.83025e-106	yes	down		maker-Fvb5-2-augustus-gene-16.39	PREDICTED: 1-aminocyclopropane-1-carboxylate synthase [Fragaria vesca subsp. vesca]	2.97212	6.27133e-54	2.05271e-52	yes	up
maker-Fvb3-2-snap-gene-307.99	PREDICTED: DEAD-box ATP-dependent RNA helicase 37-like [Fragaria vesca subsp. vesca]	-1.13139	1.40901e-49	4.12986e-48	yes	down		maker-Fvb6-3-snap-gene-50.56	PREDICTED: myb-related protein Myb4-like [Fragaria vesca subsp. vesca]	2.06569	0.00233439	0.00598356	yes	up
snap_masked-Fvb7-2-processed-gene-117.26	PREDICTED: L-3-cyanoalanine synthase 2, mitochondrial [Fragaria vesca subsp. vesca]	-1.32055	7.53188e-75	3.81471e-73	yes	down		maker-Fvb7-2-snap-gene-79.41	PREDICTED: uncharacterized protein LOC101293939 [Fragaria vesca subsp. vesca]	1.3007	0.000894242	0.00246904	yes	up
augustus_masked-Fvb5-3-processed-gene-240.6	PREDICTED: elongation factor Tu, chloroplastic [Fragaria vesca subsp. vesca]	-1.0845	3.805e-42	9.12565e-41	yes	down		maker-Fvb7-2-augustus-gene-247.57	PREDICTED: protein NRT1/ PTR FAMILY 5.1 [Fragaria vesca subsp. vesca]	1.68398	9.45728e-10	5.19154e-09	yes	up
maker-Fvb2-2-snap-gene-13.71	PREDICTED: ATP-dependent zinc metalloprotease FTSH 4, mitochondrial [Fragaria vesca subsp. vesca]	-1.31206	5.76521e-69	2.63549e-67	yes	down		augustus_masked-Fvb6-2-processed-gene-191.9	PREDICTED: uncharacterized protein At3g17950 [Fragaria vesca subsp. vesca]	2.80193	0.00207794	0.00536962	yes	up
maker-Fvb6-1-snap-gene-177.30	PREDICTED: transcription factor TCP4-like [Fragaria vesca subsp. vesca]	-1.04279	3.44274e-18	3.28918e-17	yes	down		maker-Fvb7-4-augustus-gene-47.59	PREDICTED: cytochrome P450 90A1 [Fragaria vesca subsp. vesca]	2.01355	7.24612e-78	3.88612e-76	yes	up
snap_masked-Fvb3-2-processed-gene-64.30	PREDICTED: protein PHLOEM PROTEIN 2-LIKE A1-like [Fragaria vesca subsp. vesca]	-1.08865	1.1674e-22	1.39103e-21	yes	down		maker-Fvb4-3-snap-gene-152.58	PREDICTED: xyloglucan galactosyltransferase KATAMARI1 homolog [Fragaria vesca subsp. vesca]	1.82495	2.01882e-15	1.65567e-14	yes	up
maker-Fvb5-4-snap-gene-250.39	PREDICTED: transcription factor MYB12-like [Fragaria vesca subsp. vesca]	-5.58175	2.64186e-22	3.09067e-21	yes	down		maker-Fvb1-4-augustus-gene-135.28	hypothetical protein RchiOBHm_Chr2g0118101 [Rosa chinensis]	2.65942	8.23227e-49	2.36026e-47	yes	up
maker-Fvb6-4-augustus-gene-237.36	PREDICTED: uncharacterized protein LOC101309649 isoform X1 [Fragaria vesca subsp. vesca]	-1.08901	0.000380121	0.00111621	yes	down		augustus_masked-Fvb2-4-processed-gene-245.3	PREDICTED: F-box protein AFR [Fragaria vesca subsp. vesca]	1.51345	9.88662e-40	2.19169e-38	yes	up
maker-Fvb2-2-snap-gene-160.41	PREDICTED: MATE efflux family protein 4, chloroplastic-like [Fragaria vesca subsp. vesca]	-2.02915	2.76937e-182	6.27378e-180	yes	down		maker-Fvb2-4-augustus-gene-249.55	AP3 [Fragaria x ananassa]	1.16923	0.000386369	0.00113304	yes	up
maker-Fvb3-3-augustus-gene-48.29	PREDICTED: E3 ubiquitin-protein ligase HEL2 [Fragaria vesca subsp. vesca]	-1.15772	4.37976e-35	8.37838e-34	yes	down		maker-Fvb1-4-augustus-gene-96.28	PREDICTED: ankyrin repeat-containing protein At5g02620-like [Fragaria vesca subsp. vesca]	1.73995	0.00820384	0.0188559	yes	up
augustus_masked-Fvb1-2-processed-gene-269.5	PREDICTED: protein FAR1-RELATED SEQUENCE 5-like [Fragaria vesca subsp. vesca]	-2.40583	1.40237e-10	8.22814e-10	yes	down		MSTRG.1049	PREDICTED: oxysterol-binding protein-related protein 3B [Fragaria vesca subsp. vesca]	1.33146	3.87285e-13	2.7426e-12	yes	up
maker-Fvb6-3-snap-gene-156.44	PREDICTED: protein NUCLEAR FUSION DEFECTIVE 4 [Fragaria vesca subsp. vesca]	-1.64189	2.56734e-10	1.4739e-09	yes	down		maker-Fvb6-2-snap-gene-335.43	hypothetical protein PRUPE_3G214200 [Prunus persica]	1.2779	1.00937e-25	1.36888e-24	yes	up
augustus_masked-Fvb1-2-processed-gene-225.9	PREDICTED: uncharacterized protein LOC101303944 [Fragaria vesca subsp. vesca]	-1.21701	1.89634e-08	9.26079e-08	yes	down		MSTRG.37094	PREDICTED: carboxy-terminal domain RNA polymerase II polypeptide A small phosphatase 1-like [Fragaria vesca subsp. vesca]	1.51512	1.97961e-06	7.88144e-06	yes	up
augustus_masked-Fvb2-2-processed-gene-211.5	PREDICTED: LIM domain-containing protein WLIM1-like isoform X2 [Fragaria vesca subsp. vesca]	-1.43516	1.11246e-13	8.18883e-13	yes	down		snap_masked-Fvb7-3-processed-gene-60.36	hypothetical protein PRUPE_6G200800 [Prunus persica]	1.50282	6.22364e-82	3.63444e-80	yes	up
maker-Fvb7-4-augustus-gene-9.75	PREDICTED: uncharacterized protein LOC101305012 [Fragaria vesca subsp. vesca]	-1.74113	1.46373e-06	5.90835e-06	yes	down		augustus_masked-Fvb1-4-processed-gene-62.14	PREDICTED: probable mitochondrial chaperone BCS1-A [Fragaria vesca subsp. vesca]	5.28869	1.25419e-05	4.53633e-05	yes	up
maker-Fvb6-1-snap-gene-17.62	uncharacterized protein LOC112185244 isoform X1 [Rosa chinensis]	-1.11016	0.0139688	0.0304498	yes	down		maker-Fvb3-3-snap-gene-84.43	PREDICTED: uncharacterized protein LOC101295610 [Fragaria vesca subsp. vesca]	2.37915	0.00304907	0.00764749	yes	up
maker-Fvb1-4-snap-gene-101.61	PREDICTED: uncharacterized protein LOC101304719 [Fragaria vesca subsp. vesca]	-1.31071	8.09781e-65	3.39473e-63	yes	down		augustus_masked-Fvb1-4-processed-gene-147.2	PREDICTED: ABC transporter G family member 5 [Fragaria vesca subsp. vesca]	1.35883	2.13853e-09	1.13939e-08	yes	up
maker-Fvb7-3-augustus-gene-4.59	PREDICTED: transmembrane ascorbate ferrireductase 1 [Fragaria vesca subsp. vesca]	-1.14322	5.28538e-29	8.2311e-28	yes	down		maker-Fvb6-2-augustus-gene-327.64	xyloglucan endotransglucosylase/hydrolase [Rosa hybrid cultivar]	4.68902	3.15722e-117	3.24819e-115	yes	up
maker-Fvb2-1-augustus-gene-225.39	PREDICTED: serine/threonine-protein kinase tricorner [Fragaria vesca subsp. vesca]	-1.2089	3.17163e-78	1.71496e-76	yes	down		augustus_masked-Fvb6-3-processed-gene-295.3	PREDICTED: uncharacterized protein LOC105352234 [Fragaria vesca subsp. vesca]	2.15876	0.0120108	0.0265913	yes	up
maker-Fvb4-3-snap-gene-127.61	PREDICTED: FIP1[V]-like protein isoform X1 [Fragaria vesca subsp. vesca]	-1.19819	3.1934e-08	1.52826e-07	yes	down		maker-Fvb6-4-snap-gene-237.56	putative major intrinsic protein [Rosa chinensis]	2.10805	3.97609e-129	4.81825e-127	yes	up
maker-Fvb7-1-augustus-gene-132.29	probable glutathione S-transferase [Rosa chinensis]	-1.16601	0.0122964	0.0271633	yes	down		maker-Fvb1-3-augustus-gene-23.55	PREDICTED: aldehyde dehydrogenase family 2 member C4-like [Fragaria vesca subsp. vesca]	1.93086	1.00076e-79	5.57853e-78	yes	up
MSTRG.34125	PREDICTED: extensin-like [Fragaria vesca subsp. vesca]	-1.01627	3.87002e-07	1.6665e-06	yes	down		snap_masked-Fvb6-2-processed-gene-48.22	PREDICTED: F-box/kelch-repeat protein At1g15670-like [Fragaria vesca subsp. vesca]	4.17449	1.37305e-13	1.00443e-12	yes	up
augustus_masked-Fvb7-3-processed-gene-153.9	PREDICTED: ethylene-responsive transcription factor ERF034-like [Fragaria vesca subsp. vesca]	-1.31103	2.37525e-05	8.30701e-05	yes	down		MSTRG.39854	PREDICTED: replication protein A 70 kDa DNA-binding subunit B-like [Fragaria vesca subsp. vesca]	3.25929	5.55393e-05	0.000185083	yes	up
maker-Fvb7-2-augustus-gene-248.21	PREDICTED: pseudouridine-5&apos;-monophosphatase [Fragaria vesca subsp. vesca]	-1.21789	4.69706e-48	1.32318e-46	yes	down		maker-Fvb6-1-augustus-gene-137.26	PREDICTED: GATA transcription factor 9-like [Fragaria vesca subsp. vesca]	2.02025	0.000551873	0.00157838	yes	up
maker-Fvb4-3-augustus-gene-20.38	PREDICTED: adagio protein 3 [Fragaria vesca subsp. vesca]	-4.59425	0	0	yes	down		maker-Fvb4-1-snap-gene-170.60	PREDICTED: protein O-linked-mannose beta-1,4-N-acetylglucosaminyltransferase 2-like isoform X2 [Fragaria vesca subsp. vesca]	1.18708	1.57571e-16	1.37738e-15	yes	up
maker-Fvb1-1-augustus-gene-247.44	PREDICTED: spartin-like [Fragaria vesca subsp. vesca]	-1.2011	1.51899e-06	6.11638e-06	yes	down		maker-Fvb4-2-snap-gene-26.65	putative pentatricopeptide [Rosa chinensis]	2.01803	1.02564e-59	3.88367e-58	yes	up
maker-Fvb3-1-augustus-gene-314.58	PREDICTED: E3 ubiquitin-protein ligase COP1-like isoform X1 [Fragaria vesca subsp. vesca]	-2.60417	1.05299e-177	2.30048e-175	yes	down		snap_masked-Fvb7-3-processed-gene-49.43	receptor-like serine/threonine-protein kinase At2g45590 [Prunus avium]	1.89453	2.54658e-06	1.00117e-05	yes	up
augustus_masked-Fvb7-3-processed-gene-115.5	PREDICTED: E3 ubiquitin-protein ligase At3g02290 [Fragaria vesca subsp. vesca]	-1.52687	4.11541e-44	1.04017e-42	yes	down		maker-Fvb6-3-snap-gene-59.57	PREDICTED: cellulose synthase-like protein H1 isoform X2 [Fragaria vesca subsp. vesca]	2.53881	2.12557e-21	2.38707e-20	yes	up
maker-Fvb7-2-augustus-gene-244.48	PREDICTED: uncharacterized protein LOC101311516 [Fragaria vesca subsp. vesca]	-1.54834	2.93083e-70	1.37464e-68	yes	down		MSTRG.64626	putative TIR domain, winged helix-turn-helix DNA-binding domain-containing protein [Rosa chinensis]	2.30623	7.45614e-13	5.17731e-12	yes	up
maker-Fvb5-3-augustus-gene-36.29	PREDICTED: laccase-14-like [Fragaria vesca subsp. vesca]	-1.57122	1.16755e-49	3.4265e-48	yes	down		snap_masked-Fvb2-1-processed-gene-158.23	PREDICTED: LRR receptor-like serine/threonine-protein kinase ERL2 [Fragaria vesca subsp. vesca]	1.12592	1.9567e-07	8.6553e-07	yes	up
maker-Fvb5-4-augustus-gene-79.38	PREDICTED: protein TIFY 6B [Fragaria vesca subsp. vesca]	-1.7088	7.0859e-15	5.62178e-14	yes	down		maker-Fvb1-2-snap-gene-234.17	PREDICTED: kinesin light chain 1 isoform X1 [Fragaria vesca subsp. vesca]	1.04551	7.97566e-16	6.70232e-15	yes	up
maker-Fvb2-2-snap-gene-29.65	adenine phosphoribosyltransferase 5-like isoform X1 [Prunus avium]	-1.09428	2.65417e-21	2.96154e-20	yes	down		maker-Fvb6-4-snap-gene-118.48	PREDICTED: RING finger and CHY zinc finger domain-containing protein 1 [Fragaria vesca subsp. vesca]	5.25995	3.80531e-05	0.000129552	yes	up
maker-Fvb2-4-snap-gene-14.57	PREDICTED: uncharacterized protein LOC101309594 [Fragaria vesca subsp. vesca]	-1.43201	5.75708e-86	3.67462e-84	yes	down		MSTRG.17125	UDP-glucose:anthocysnin 5-O-glucosyltransferase, partial [Rosa hybrid cultivar]	1.98567	2.23032e-09	1.1872e-08	yes	up
maker-Fvb6-1-augustus-gene-261.38	PREDICTED: pentatricopeptide repeat-containing protein At5g02830, chloroplastic isoform X2 [Fragaria vesca subsp. vesca]	-1.7136	4.81553e-104	4.19425e-102	yes	down		maker-Fvb6-2-snap-gene-358.56	PREDICTED: aspartic proteinase nepenthesin-2 [Fragaria vesca subsp. vesca]	1.7583	5.27446e-05	0.000176319	yes	up
maker-Fvb5-2-augustus-gene-22.44	PREDICTED: endoglucanase 6 [Fragaria vesca subsp. vesca]	-2.13574	4.39885e-49	1.27149e-47	yes	down		maker-Fvb4-1-snap-gene-14.61	PREDICTED: G-type lectin S-receptor-like serine/threonine-protein kinase CES101 [Fragaria vesca subsp. vesca]	1.26802	1.49806e-51	4.62058e-50	yes	up
maker-Fvb6-4-augustus-gene-27.53	PREDICTED: probable glycosyltransferase At5g20260 isoform X3 [Fragaria vesca subsp. vesca]	-1.05781	5.9563e-43	1.46168e-41	yes	down		maker-Fvb5-3-augustus-gene-101.30	PREDICTED: 2-C-methyl-D-erythritol 4-phosphate cytidylyltransferase, chloroplastic-like [Fragaria vesca subsp. vesca]	2.51335	2.25237e-83	1.36652e-81	yes	up
maker-Fvb2-3-augustus-gene-70.51	PREDICTED: probable beta-1,3-galactosyltransferase 12 [Fragaria vesca subsp. vesca]	-1.09901	6.24549e-07	2.62707e-06	yes	down		MSTRG.34822	PREDICTED: F-box protein At5g07610-like [Fragaria vesca subsp. vesca]	1.43849	9.6024e-07	3.95411e-06	yes	up
maker-Fvb1-2-augustus-gene-164.25	PREDICTED: uncharacterized protein LOC101306864 [Fragaria vesca subsp. vesca]	-1.03161	1.34779e-11	8.53987e-11	yes	down		maker-Fvb7-4-augustus-gene-203.18	putative tetratricopeptide-like helical domain, DYW domain-containing protein [Rosa chinensis]	1.11772	0.000859085	0.00238033	yes	up
maker-Fvb1-3-augustus-gene-3.64	PREDICTED: uncharacterized protein LOC101305205 isoform X1 [Fragaria vesca subsp. vesca]	-1.50762	3.77566e-76	1.94877e-74	yes	down		augustus_masked-Fvb3-4-processed-gene-35.20	PREDICTED: probable galactinol--sucrose galactosyltransferase 1 [Fragaria vesca subsp. vesca]	1.2975	2.31385e-24	2.95213e-23	yes	up
augustus_masked-Fvb5-1-processed-gene-79.14	PREDICTED: protein ASPARTIC PROTEASE IN GUARD CELL 1 [Fragaria vesca subsp. vesca]	-1.03307	7.12125e-07	2.97531e-06	yes	down		maker-Fvb2-1-snap-gene-171.36	histone-lysine N-methyltransferase ASHR1-like isoform X1 [Rosa chinensis]	3.33922	0.000424235	0.00123652	yes	up
maker-Fvb6-3-augustus-gene-424.57	PREDICTED: ferrochelatase-2, chloroplastic [Fragaria vesca subsp. vesca]	-1.26984	4.79149e-71	2.26932e-69	yes	down		maker-Fvb6-3-augustus-gene-412.63	PREDICTED: TMV resistance protein N-like isoform X1 [Fragaria vesca subsp. vesca]	1.36551	3.82133e-38	8.04281e-37	yes	up
maker-Fvb6-1-augustus-gene-333.55	PREDICTED: RNA-binding protein cabeza [Fragaria vesca subsp. vesca]	-1.09356	1.63234e-05	5.83075e-05	yes	down		augustus_masked-Fvb7-2-processed-gene-101.11	cytochrome P450 71A3-like [Rosa chinensis]	1.2846	0.0139522	0.0304179	yes	up
maker-Fvb6-2-augustus-gene-291.46	PREDICTED: homeobox-leucine zipper protein HAT5 [Fragaria vesca subsp. vesca]	-1.37625	7.21221e-23	8.66105e-22	yes	down		maker-Fvb7-4-snap-gene-182.45	PREDICTED: vacuolar protein sorting-associated protein 36 [Fragaria vesca subsp. vesca]	1.69342	2.40403e-17	2.2032e-16	yes	up
maker-Fvb1-3-augustus-gene-130.30	PREDICTED: uncharacterized protein LOC101298458 [Fragaria vesca subsp. vesca]	-1.00754	7.67223e-11	4.59385e-10	yes	down		maker-Fvb7-3-augustus-gene-186.20	PREDICTED: GDSL esterase/lipase At5g03610-like [Fragaria vesca subsp. vesca]	3.82196	0.0101362	0.022816	yes	up
maker-Fvb7-2-augustus-gene-250.70	PREDICTED: tRNA (guanine(26)-N(2))-dimethyltransferase isoform X1 [Fragaria vesca subsp. vesca]	-1.57233	1.07675e-14	8.44291e-14	yes	down		MSTRG.15387	PREDICTED: PRA1 family protein B4 [Fragaria vesca subsp. vesca]	1.68578	0.00979244	0.0221196	yes	up
maker-Fvb6-1-augustus-gene-247.39	putative phytosulfokine [Rosa chinensis]	-2.10145	0.00069158	0.00194534	yes	down		maker-Fvb1-3-snap-gene-182.23	PREDICTED: uncharacterized protein LOC101312768 isoform X1 [Fragaria vesca subsp. vesca]	1.01136	1.01898e-09	5.58068e-09	yes	up
MSTRG.46997	proline-rich receptor-like protein kinase PERK2 [Rosa chinensis]	-2.22532	1.33632e-18	1.30574e-17	yes	down		MSTRG.12515	PREDICTED: protein RADIALIS-like 3 [Fragaria vesca subsp. vesca]	2.23591	1.4938e-09	8.07154e-09	yes	up
maker-Fvb1-1-snap-gene-223.98	PREDICTED: protein S-acyltransferase 10-like [Fragaria vesca subsp. vesca]	-1.1126	8.37359e-21	9.13822e-20	yes	down		maker-Fvb4-3-augustus-gene-131.39	PREDICTED: major allergen Mal d 1-like [Fragaria vesca subsp. vesca]	4.29478	1.05416e-36	2.13328e-35	yes	up
snap_masked-Fvb7-1-processed-gene-311.27	PREDICTED: zinc finger protein CONSTANS-LIKE 1 [Fragaria vesca subsp. vesca]	-1.2224	8.4528e-21	9.22357e-20	yes	down		maker-Fvb6-4-snap-gene-318.67	PREDICTED: G-type lectin S-receptor-like serine/threonine-protein kinase At4g03230 isoform X1 [Fragaria vesca subsp. vesca]	1.5605	2.68187e-38	5.67705e-37	yes	up
MSTRG.7203	vegetative cell wall protein gp1-like [Rosa chinensis]	-1.26172	0.000107661	0.000343922	yes	down		augustus_masked-Fvb1-1-processed-gene-97.14	PREDICTED: ankyrin repeat-containing protein P16F5.05c [Fragaria vesca subsp. vesca]	1.59624	0.000194894	0.000598476	yes	up
maker-Fvb6-3-snap-gene-89.32	PREDICTED: ABC transporter C family member 8-like [Fragaria vesca subsp. vesca]	-1.05897	5.53178e-22	6.39024e-21	yes	down		MSTRG.14387	PREDICTED: U-box domain-containing protein 26 [Fragaria vesca subsp. vesca]	1.60501	3.56225e-18	3.39877e-17	yes	up
maker-Fvb5-1-augustus-gene-74.45	PREDICTED: bidirectional sugar transporter SWEET4 [Fragaria vesca subsp. vesca]	-1.95246	1.0154e-05	3.71786e-05	yes	down		maker-Fvb5-1-augustus-gene-128.39	PREDICTED: flavonol synthase 3-like [Fragaria vesca subsp. vesca]	1.34909	3.41804e-52	1.07406e-50	yes	up
maker-Fvb7-4-augustus-gene-7.46	PREDICTED: growth-regulating factor 3 [Fragaria vesca subsp. vesca]	-1.62463	7.10896e-09	3.61905e-08	yes	down		maker-Fvb2-2-augustus-gene-91.33	PREDICTED: U-box domain-containing protein 9 [Fragaria vesca subsp. vesca]	1.13175	2.65607e-24	3.38124e-23	yes	up
augustus_masked-Fvb7-3-processed-gene-15.9	PREDICTED: uncharacterized protein LOC105353125 [Fragaria vesca subsp. vesca]	-1.50985	3.41147e-26	4.72621e-25	yes	down		maker-Fvb6-1-augustus-gene-59.58	PREDICTED: xyloglucan endotransglucosylase/hydrolase protein 9 [Fragaria vesca subsp. vesca]	2.84674	2.43982e-26	3.39442e-25	yes	up
maker-Fvb1-2-snap-gene-159.48	PREDICTED: 4-alpha-glucanotransferase, chloroplastic/amyloplastic [Fragaria vesca subsp. vesca]	-1.71719	1.04846e-146	1.59922e-144	yes	down		snap_masked-Fvb1-3-processed-gene-247.11	PREDICTED: putative membrane-bound O-acyltransferase C24H6.01c [Fragaria vesca subsp. vesca]	1.66117	1.13768e-61	4.49481e-60	yes	up
snap_masked-Fvb3-4-processed-gene-276.1	PREDICTED: uncharacterized protein LOC101311743 [Fragaria vesca subsp. vesca]	-1.37306	0.00273759	0.00692992	yes	down		maker-Fvb6-2-augustus-gene-353.38	PREDICTED: cytochrome P450 97B2, chloroplastic [Fragaria vesca subsp. vesca]	2.39715	9.91714e-166	1.90029e-163	yes	up
maker-Fvb5-2-augustus-gene-2.47	PREDICTED: elongation factor G-2, chloroplastic [Fragaria vesca subsp. vesca]	-1.14723	4.47337e-67	1.96206e-65	yes	down		maker-Fvb3-3-snap-gene-64.46	ent-kaur-16-ene synthase, chloroplastic-like isoform X1 [Rosa chinensis]	1.15129	1.61609e-29	2.58372e-28	yes	up
maker-Fvb3-1-augustus-gene-54.21	PREDICTED: methylsterol monooxygenase 2-2 isoform X1 [Fragaria vesca subsp. vesca]	-2.23577	1.0186e-83	6.22087e-82	yes	down		maker-Fvb7-1-augustus-gene-257.37	PREDICTED: uncharacterized protein At2g39920 [Fragaria vesca subsp. vesca]	2.70524	9.56036e-45	2.46309e-43	yes	up
maker-Fvb2-2-augustus-gene-170.33	G-box-binding factor 1-like [Rosa chinensis]	-1.25522	1.98836e-08	9.69577e-08	yes	down		snap_masked-Fvb4-4-processed-gene-18.29	PREDICTED: protein PLANT CADMIUM RESISTANCE 2-like [Fragaria vesca subsp. vesca]	3.74514	0.000526867	0.00151203	yes	up
maker-Fvb4-2-snap-gene-56.58	PREDICTED: uncharacterized protein LOC101301049 isoform X1 [Fragaria vesca subsp. vesca]	-1.40497	3.91592e-06	1.50661e-05	yes	down		maker-Fvb4-3-augustus-gene-165.24	PREDICTED: uncharacterized protein LOC101307887 [Fragaria vesca subsp. vesca]	1.50346	0.00109064	0.00296422	yes	up
MSTRG.42427	PREDICTED: alternative NAD(P)H-ubiquinone oxidoreductase C1, chloroplastic/mitochondrial [Fragaria vesca subsp. vesca]	-1.90709	7.48169e-29	1.15789e-27	yes	down		augustus_masked-Fvb2-2-processed-gene-112.10	PREDICTED: 3-hydroxy-3-methylglutaryl-coenzyme A reductase 1-like [Fragaria vesca subsp. vesca]	4.93796	1.52256e-272	9.09345e-270	yes	up
MSTRG.6429	PREDICTED: uncharacterized protein LOC101291956 [Fragaria vesca subsp. vesca]	-1.95058	1.67631e-13	1.21939e-12	yes	down		augustus_masked-Fvb2-1-processed-gene-160.2	PREDICTED: uncharacterized protein LOC105349775 [Fragaria vesca subsp. vesca]	2.63442	0.00384474	0.00944534	yes	up
MSTRG.20498	PREDICTED: ubiquitin carboxyl-terminal hydrolase 15 isoform X1 [Fragaria vesca subsp. vesca]	-1.98905	7.51774e-141	1.05084e-138	yes	down		maker-Fvb5-1-augustus-gene-267.37	PREDICTED: mechanosensitive ion channel protein 2, chloroplastic-like [Fragaria vesca subsp. vesca]	1.72403	7.61145e-39	1.64259e-37	yes	up
maker-Fvb3-2-augustus-gene-273.18	PREDICTED: protein CHdown1, chloroplastic isoform X2 [Fragaria vesca subsp. vesca]	-1.0636	5.66602e-08	2.65372e-07	yes	down		MSTRG.53671	uncharacterized protein LOC112170807 [Rosa chinensis]	3.4468	0.00248101	0.00633078	yes	up
maker-Fvb5-2-snap-gene-13.50	PREDICTED: uncharacterized protein LOC101311382 [Fragaria vesca subsp. vesca]	-1.06457	8.25696e-20	8.5542e-19	yes	down		snap_masked-Fvb6-3-processed-gene-49.46	PREDICTED: diacylglycerol kinase 5 isoform X1 [Fragaria vesca subsp. vesca]	1.2984	0.000798024	0.00222219	yes	up
maker-Fvb5-3-augustus-gene-104.29	PREDICTED: chitinase 10-like [Fragaria vesca subsp. vesca]	-1.22342	6.61855e-11	3.98343e-10	yes	down		maker-Fvb6-3-augustus-gene-298.25	PREDICTED: DEAD-box ATP-dependent RNA helicase 38 [Fragaria vesca subsp. vesca]	1.09228	0.00804909	0.0185377	yes	up
maker-Fvb4-1-augustus-gene-155.24	leucoanthocyanidin reductase [Fragaria x ananassa]	-1.61828	3.01442e-28	4.54888e-27	yes	down		augustus_masked-Fvb6-4-processed-gene-89.9	PREDICTED: uncharacterized protein LOC101294772 [Fragaria vesca subsp. vesca]	1.58415	1.99176e-32	3.5189e-31	yes	up
maker-Fvb5-1-augustus-gene-23.38	PREDICTED: triose phosphate/phosphate translocator, non-green plastid, chloroplastic [Fragaria vesca subsp. vesca]	-1.3394	1.08896e-61	4.30604e-60	yes	down		augustus_masked-Fvb1-4-processed-gene-143.7	PREDICTED: cell wall / vacuolar inhibitor of fructosidase 2 [Fragaria vesca subsp. vesca]	2.64076	1.36728e-38	2.92595e-37	yes	up
maker-Fvb6-2-augustus-gene-11.26	PREDICTED: protein PHR1-LIKE 1 [Fragaria vesca subsp. vesca]	-1.06106	7.42909e-21	8.1316e-20	yes	down		maker-Fvb1-2-augustus-gene-93.37	PREDICTED: BTB/POZ domain-containing protein At5g66560 [Fragaria vesca subsp. vesca]	1.10229	0.000435268	0.00126699	yes	up
maker-Fvb5-1-augustus-gene-86.52	PREDICTED: uncharacterized protein LOC101311283 [Fragaria vesca subsp. vesca]	-1.49092	1.08521e-107	9.95148e-106	yes	down		maker-Fvb1-3-augustus-gene-167.24	PREDICTED: GDP-mannose transporter GONST1 [Fragaria vesca subsp. vesca]	1.17866	4.6076e-53	1.47405e-51	yes	up
maker-Fvb3-2-augustus-gene-294.56	PREDICTED: E3 ubiquitin-protein ligase At1g63170 [Fragaria vesca subsp. vesca]	-1.0168	0.0223959	0.0464345	yes	down		maker-Fvb4-2-snap-gene-51.77	PREDICTED: uncharacterized protein LOC101308084 [Fragaria vesca subsp. vesca]	1.51103	3.63912e-23	4.41514e-22	yes	up
maker-Fvb7-2-augustus-gene-139.60	PREDICTED: probable inactive purple acid phosphatase 29 isoform X2 [Fragaria vesca subsp. vesca]	-1.03952	5.26987e-17	4.73758e-16	yes	down		augustus_masked-Fvb6-2-processed-gene-191.14	PREDICTED: WD repeat-containing protein 44-like [Fragaria vesca subsp. vesca]	1.13284	1.92997e-08	9.42104e-08	yes	up
maker-Fvb5-1-snap-gene-103.69	PREDICTED: ATP-dependent RNA helicase DHX36 [Fragaria vesca subsp. vesca]	-1.2051	3.68024e-51	1.12756e-49	yes	down		maker-Fvb3-4-augustus-gene-29.38	PREDICTED: eukaryotic translation initiation factor 2 subunit beta-like isoform X1 [Fragaria vesca subsp. vesca]	1.92934	6.76551e-10	3.75764e-09	yes	up
maker-Fvb1-2-augustus-gene-189.25	PREDICTED: uncharacterized protein LOC101309584 [Fragaria vesca subsp. vesca]	-1.30536	2.12918e-16	1.84801e-15	yes	down		MSTRG.50295	PREDICTED: proline-rich receptor-like protein kinase PERK1 [Fragaria vesca subsp. vesca]	1.28766	8.39319e-56	2.87727e-54	yes	up
augustus_masked-Fvb6-1-processed-gene-263.10	PREDICTED: uncharacterized protein LOC103340218 [Prunus mume]	-1.73377	0.0186768	0.0395473	yes	down		maker-Fvb3-2-augustus-gene-238.31	PREDICTED: DNA repair protein RAD51 homolog 2 isoform X2 [Fragaria vesca subsp. vesca]	2.01873	0.00599396	0.0141741	yes	up
maker-Fvb6-2-augustus-gene-212.30	hypothetical protein RchiOBHm_Chr3g0461831 [Rosa chinensis]	-2.67965	7.11761e-14	5.29952e-13	yes	down		maker-Fvb6-3-snap-gene-28.49	PREDICTED: probable receptor-like protein kinase At5g15080 isoform X3 [Fragaria vesca subsp. vesca]	3.25104	0.000117564	0.000373365	yes	up
MSTRG.7307	PREDICTED: LOW QUALITY PROTEIN: extensin-like [Pyrus x bretschneideri]	-2.76638	3.35982e-299	2.45256e-296	yes	down		MSTRG.25544	PREDICTED: photosystem I subunit O [Fragaria vesca subsp. vesca]	1.17287	1.25053e-89	8.45106e-88	yes	up
maker-Fvb7-1-snap-gene-276.64	hypothetical protein RchiOBHm_Chr1g0379311 [Rosa chinensis]	-1.09389	0.00882768	0.0201388	yes	down		MSTRG.40686	PREDICTED: floral homeotic protein APETALA 2-like isoform X3 [Fragaria vesca subsp. vesca]	1.23091	4.89138e-22	5.66113e-21	yes	up
maker-Fvb3-2-augustus-gene-58.57	PREDICTED: uncharacterized oxidoreductase C663.09c [Fragaria vesca subsp. vesca]	-1.52266	2.02593e-40	4.59752e-39	yes	down		maker-Fvb3-1-augustus-gene-63.43	PREDICTED: sodium-coupled neutral amino acid transporter 5-like [Fragaria vesca subsp. vesca]	3.67626	0.013438	0.0294147	yes	up
snap_masked-Fvb7-4-processed-gene-137.16	--	-1.02882	4.85857e-27	6.97257e-26	yes	down		maker-Fvb3-2-augustus-gene-272.29	PREDICTED: probable protein phosphatase 2C 25 [Fragaria vesca subsp. vesca]	1.61185	1.39185e-15	1.15382e-14	yes	up
augustus_masked-Fvb3-3-processed-gene-146.5	E3 ubiquitin-protein ligase PUB23-like [Rosa chinensis]	-1.01718	0.0189645	0.0400909	yes	down		maker-Fvb5-2-snap-gene-24.44	PREDICTED: uncharacterized protein LOC101301396 [Fragaria vesca subsp. vesca]	1.35682	1.32244e-12	9.02523e-12	yes	up
maker-Fvb1-4-augustus-gene-124.45	protein RAE1-like [Rosa chinensis]	-1.04412	1.562e-05	5.59146e-05	yes	down		snap_masked-Fvb5-1-processed-gene-134.21	TMV resistance protein N-like [Rosa chinensis]	1.51555	5.10929e-23	6.16871e-22	yes	up
augustus_masked-Fvb6-1-processed-gene-225.13	PREDICTED: uncharacterized protein LOC105352288 [Fragaria vesca subsp. vesca]	-2.40602	0.000680341	0.00191537	yes	down		augustus_masked-Fvb4-3-processed-gene-33.13	PREDICTED: cytochrome P450 704B1 [Fragaria vesca subsp. vesca]	1.32402	0.000107846	0.000344443	yes	up
maker-Fvb6-4-snap-gene-41.96	PREDICTED: bifunctional 3-dehydroquinate dehydratase/shikimate dehydrogenase, chloroplastic-like [Fragaria vesca subsp. vesca]	-1.86276	5.78968e-93	4.14406e-91	yes	down		maker-Fvb4-3-augustus-gene-100.46	uncharacterized protein LOC112196626 [Rosa chinensis]	3.23109	1.42642e-12	9.70892e-12	yes	up
augustus_masked-Fvb7-2-processed-gene-192.1	PREDICTED: hydroquinone glucosyltransferase-like [Fragaria vesca subsp. vesca]	-2.0271	9.24694e-74	4.55542e-72	yes	down		augustus_masked-Fvb3-2-processed-gene-97.7	PREDICTED: mediator of RNA polymerase II transcription subunit 19a-like [Fragaria vesca subsp. vesca]	1.87894	1.85788e-19	1.8953e-18	yes	up
maker-Fvb5-4-augustus-gene-13.48	PREDICTED: uncharacterized protein LOC101311382 [Fragaria vesca subsp. vesca]	-1.49758	1.07372e-27	1.58543e-26	yes	down		maker-Fvb3-4-snap-gene-201.57	PREDICTED: epidermis-specific secreted glycoprotein EP1-like [Fragaria vesca subsp. vesca]	3.80746	1.09466e-56	3.84873e-55	yes	up
snap_masked-Fvb3-3-processed-gene-128.26	PREDICTED: uncharacterized protein LOC105350538 [Fragaria vesca subsp. vesca]	-1.64172	2.4348e-23	2.97678e-22	yes	down		augustus_masked-Fvb5-1-processed-gene-173.6	PREDICTED: flowering time control protein FY-like [Fragaria vesca subsp. vesca]	2.30273	9.38504e-22	1.07017e-20	yes	up
maker-Fvb1-3-augustus-gene-194.48	PREDICTED: uncharacterized protein LOC101298068 [Fragaria vesca subsp. vesca]	-2.57996	2.8358e-77	1.50332e-75	yes	down		MSTRG.45174	PREDICTED: uncharacterized protein LOC101293506 [Fragaria vesca subsp. vesca]	1.77701	4.6183e-130	5.64858e-128	yes	up
maker-Fvb4-2-augustus-gene-237.14	ethylene receptor [Fragaria x ananassa]	-2.00409	4.32118e-98	3.35963e-96	yes	down		augustus_masked-Fvb3-1-processed-gene-160.5	PREDICTED: probable CCR4-associated factor 1 homolog 11 [Fragaria vesca subsp. vesca]	4.22691	6.65021e-32	1.15538e-30	yes	up
maker-Fvb3-1-snap-gene-317.58	PREDICTED: pentatricopeptide repeat-containing protein At4g16390, chloroplastic [Fragaria vesca subsp. vesca]	-1.3734	9.68609e-68	4.31423e-66	yes	down		augustus_masked-Fvb3-2-processed-gene-121.2	PREDICTED: uncharacterized protein LOC105350158 [Fragaria vesca subsp. vesca]	1.88899	0.000722989	0.00202854	yes	up
maker-Fvb2-2-augustus-gene-18.52	PREDICTED: pentatricopeptide repeat-containing protein At5g24830 [Fragaria vesca subsp. vesca]	-1.19801	6.63308e-43	1.6223e-41	yes	down		maker-Fvb2-4-augustus-gene-88.26	LEAF RUST 10 DISEASE-RESISTANCE LOCUS RECEPTOR-LIKE PROTEIN KINASE-like 1.4 isoform X4 [Rosa chinensis]	1.4268	6.56531e-22	7.5472e-21	yes	up
maker-Fvb3-3-snap-gene-262.45	PREDICTED: peroxidase 4-like [Fragaria vesca subsp. vesca]	-1.71358	2.79056e-23	3.40494e-22	yes	down		maker-Fvb5-1-snap-gene-231.34	PREDICTED: probable inactive receptor kinase At1g27190 [Fragaria vesca subsp. vesca]	1.88892	4.99349e-57	1.77124e-55	yes	up
maker-Fvb7-3-augustus-gene-45.62	PREDICTED: uncharacterized protein LOC101300762 [Fragaria vesca subsp. vesca]	-1.71875	2.37248e-87	1.53887e-85	yes	down		maker-Fvb7-3-snap-gene-117.32	PREDICTED: putative receptor-like protein kinase At3g47110 isoform X1 [Fragaria vesca subsp. vesca]	1.15827	6.80409e-05	0.000224169	yes	up
MSTRG.13176	PREDICTED: helicase and polymerase-containing protein TEBICHI [Fragaria vesca subsp. vesca]	-1.16175	7.76285e-48	2.17284e-46	yes	down		MSTRG.66255	extensin-3-like isoform X4 [Rosa chinensis]	1.05324	2.25966e-34	4.21827e-33	yes	up
maker-Fvb3-4-augustus-gene-111.31	PREDICTED: major latex protein 146-like [Fragaria vesca subsp. vesca]	-1.52127	5.94559e-125	6.75125e-123	yes	down		maker-Fvb6-3-augustus-gene-384.49	probable serine/threonine-protein kinase PBL7 [Rosa chinensis]	1.34123	4.67941e-27	6.7207e-26	yes	up
maker-Fvb3-1-augustus-gene-218.51	PREDICTED: B-box zinc finger protein 22 [Fragaria vesca subsp. vesca]	-1.73422	4.50428e-64	1.86784e-62	yes	down		augustus_masked-Fvb1-1-processed-gene-249.3	PREDICTED: E3 ubiquitin-protein ligase ATL42 [Fragaria vesca subsp. vesca]	2.65952	0.00868116	0.019833	yes	up
maker-Fvb1-3-augustus-gene-44.33	putative peroxiredoxin [Rosa chinensis]	-2.10035	8.53306e-234	3.354e-231	yes	down		maker-Fvb4-4-snap-gene-70.61	PREDICTED: uncharacterized protein LOC101303480 isoform X2 [Fragaria vesca subsp. vesca]	3.61789	0.00593799	0.0140554	yes	up
maker-Fvb4-3-augustus-gene-42.58	PREDICTED: uncharacterized protein At1g04910-like [Fragaria vesca subsp. vesca]	-2.39984	1.31266e-84	8.17977e-83	yes	down		augustus_masked-Fvb4-4-processed-gene-146.4	PREDICTED: histidine protein methyltransferase 1 homolog [Fragaria vesca subsp. vesca]	1.06047	1.51428e-05	5.43119e-05	yes	up
snap_masked-Fvb2-4-processed-gene-261.58	PREDICTED: probable galacturonosyltransferase-like 1 [Pyrus x bretschneideri]	-1.61658	6.78392e-05	0.000223528	yes	down		MSTRG.15705	hypothetical protein RchiOBHm_Chr6g0284021 [Rosa chinensis]	1.73171	5.69365e-13	3.98114e-12	yes	up
augustus_masked-Fvb5-1-processed-gene-228.0	uncharacterized protein LOC112198832 [Rosa chinensis]	-1.67668	2.63036e-06	1.03248e-05	yes	down		maker-Fvb7-4-snap-gene-34.78	PREDICTED: branchpoint-bridging protein [Fragaria vesca subsp. vesca]	1.1534	2.59742e-29	4.1041e-28	yes	up
maker-Fvb7-2-augustus-gene-39.41	PREDICTED: cysteine proteinase inhibitor A [Fragaria vesca subsp. vesca]	-1.34909	3.97815e-36	7.87716e-35	yes	down		maker-Fvb2-4-augustus-gene-74.36	PREDICTED: squalene synthase-like isoform X1 [Fragaria vesca subsp. vesca]	1.02476	1.03352e-35	2.01097e-34	yes	up
augustus_masked-Fvb1-3-processed-gene-257.5	inorganic pyrophosphatase 1-like [Rosa chinensis]	-1.66327	0.000720248	0.00202171	yes	down		maker-Fvb6-3-snap-gene-51.17	PREDICTED: G-type lectin S-receptor-like serine/threonine-protein kinase At4g03230 isoform X1 [Fragaria vesca subsp. vesca]	1.41722	8.23885e-35	1.55857e-33	yes	up
MSTRG.49541	PREDICTED: protein NRT1/ PTR FAMILY 2.8 [Fragaria vesca subsp. vesca]	-1.27407	3.40478e-23	4.14011e-22	yes	down		maker-Fvb3-4-snap-gene-129.24	PREDICTED: uncharacterized protein LOC101303666 [Fragaria vesca subsp. vesca]	1.25756	8.3746e-45	2.15941e-43	yes	up
maker-Fvb2-4-augustus-gene-60.31	PREDICTED: transcription factor RADIALIS-like [Fragaria vesca subsp. vesca]	-1.30661	1.0727e-08	5.36591e-08	yes	down		MSTRG.38379	--	1.6334	2.45466e-13	1.7659e-12	yes	up
maker-Fvb7-2-augustus-gene-285.43	PREDICTED: zinc finger protein CONSTANS-LIKE 1 [Fragaria vesca subsp. vesca]	-1.3481	3.13933e-11	1.93385e-10	yes	down		maker-Fvb1-4-augustus-gene-53.63	PREDICTED: GDSL esterase/lipase EXL3-like [Fragaria vesca subsp. vesca]	1.28425	0.000352154	0.00103993	yes	up
maker-Fvb6-1-augustus-gene-310.51	PREDICTED: protein LURP-one-related 8 [Fragaria vesca subsp. vesca]	-1.22876	4.86996e-32	8.48975e-31	yes	down		maker-Fvb3-1-snap-gene-304.84	PREDICTED: uncharacterized protein LOC101309576 [Fragaria vesca subsp. vesca]	1.2227	1.18391e-06	4.82694e-06	yes	up
augustus_masked-Fvb5-4-processed-gene-24.12	PREDICTED: uncharacterized protein LOC105351441 [Fragaria vesca subsp. vesca]	-1.09476	1.23822e-13	9.08116e-13	yes	down		maker-Fvb7-1-augustus-gene-65.14	PREDICTED: glycosyltransferase family protein 64 protein C5 [Fragaria vesca subsp. vesca]	1.40261	8.67425e-05	0.00028124	yes	up
maker-Fvb3-1-augustus-gene-159.15	PREDICTED: protein ROOT PRIMORDIUM DEFECTIVE 1 [Fragaria vesca subsp. vesca]	-1.56382	2.41893e-31	4.12311e-30	yes	down		snap_masked-Fvb5-1-processed-gene-52.43	PREDICTED: alpha-mannosidase-like isoform X2 [Fragaria vesca subsp. vesca]	1.14714	2.68594e-11	1.66336e-10	yes	up
MSTRG.25439	chloroplast envelope membrane protein, partial (plastid) [Fragaria vesca subsp. vesca]	-1.66632	0.000956907	0.00262684	yes	down		maker-Fvb1-1-augustus-gene-257.55	PREDICTED: uncharacterized protein LOC101300482 [Fragaria vesca subsp. vesca]	1.16584	0.00889127	0.0202657	yes	up
augustus_masked-Fvb5-4-processed-gene-103.3	PREDICTED: putative invertase inhibitor [Fragaria vesca subsp. vesca]	-1.4047	0.000897567	0.00247755	yes	down		MSTRG.57146	extensin-like [Prunus avium]	1.00712	3.50748e-06	1.35742e-05	yes	up
maker-Fvb6-1-augustus-gene-323.39	PREDICTED: uncharacterized protein LOC101290777 isoform X2 [Fragaria vesca subsp. vesca]	-1.01265	2.09028e-07	9.22264e-07	yes	down		maker-Fvb6-2-augustus-gene-32.33	PREDICTED: mediator of RNA polymerase II transcription subunit 9 [Fragaria vesca subsp. vesca]	1.01876	0.00217005	0.00559145	yes	up
snap_masked-Fvb5-2-processed-gene-93.17	PREDICTED: non-specific lipid-transfer protein 2 [Fragaria vesca subsp. vesca]	-1.50936	1.63957e-22	1.94156e-21	yes	down		MSTRG.51908	putative transcription factor C2H2 family [Rosa chinensis]	1.49743	8.0769e-21	8.82491e-20	yes	up
maker-Fvb1-2-snap-gene-284.36	PREDICTED: photosynthetic NDH subunit of subcomplex B 2, chloroplastic [Fragaria vesca subsp. vesca]	-1.33982	7.49561e-50	2.20754e-48	yes	down		maker-Fvb6-1-snap-gene-57.83	PREDICTED: uncharacterized protein LOC101305493 [Fragaria vesca subsp. vesca]	2.56308	0.005606	0.0133314	yes	up
augustus_masked-Fvb4-2-processed-gene-37.1	hypothetical protein RchiOBHm_Chr1g0340821 [Rosa chinensis]	-1.07275	0.0151888	0.0328405	yes	down		maker-Fvb6-1-augustus-gene-273.46	PREDICTED: tropinone reductase homolog [Fragaria vesca subsp. vesca]	2.47933	4.93725e-12	3.22773e-11	yes	up
maker-Fvb6-4-augustus-gene-214.38	hypothetical protein RchiOBHm_Chr2g0132501 [Rosa chinensis]	-1.75097	0.0119056	0.026378	yes	down		MSTRG.32187	PREDICTED: general transcription factor IIE subunit 1-like [Fragaria vesca subsp. vesca]	1.37561	3.25934e-05	0.000111942	yes	up
augustus_masked-Fvb1-4-processed-gene-88.11	PREDICTED: uncharacterized protein LOC101300093 [Fragaria vesca subsp. vesca]	-1.47935	9.57472e-08	4.38437e-07	yes	down		MSTRG.18073	PREDICTED: proteinaceous RNase P 2 [Fragaria vesca subsp. vesca]	1.56113	6.31039e-59	2.34602e-57	yes	up
maker-Fvb5-3-augustus-gene-203.60	PREDICTED: S-adenosylmethionine carrier 1, chloroplastic/mitochondrial [Fragaria vesca subsp. vesca]	-1.33979	1.7064e-05	6.08019e-05	yes	down		maker-Fvb6-1-augustus-gene-54.51	PREDICTED: LOB domain-containing protein 41-like [Fragaria vesca subsp. vesca]	4.54052	1.5096e-08	7.43569e-08	yes	up
MSTRG.38749	PREDICTED: NAC domain-containing protein 100 [Fragaria vesca subsp. vesca]	-3.91376	3.84672e-55	1.30459e-53	yes	down		augustus_masked-Fvb7-1-processed-gene-169.9	PREDICTED: acetyl-coenzyme A carboxylase carboxyl transferase subunit alpha, chloroplastic-like [Fragaria vesca subsp. vesca]	1.92133	4.38491e-60	1.67695e-58	yes	up
maker-Fvb4-2-augustus-gene-45.43	PREDICTED: probable transcription factor GLK2 [Fragaria vesca subsp. vesca]	-1.28719	1.6309e-12	1.1072e-11	yes	down		maker-Fvb4-3-augustus-gene-295.49	PREDICTED: myb-related protein Myb4-like [Fragaria vesca subsp. vesca]	2.24633	1.65814e-13	1.20675e-12	yes	up
maker-Fvb6-1-snap-gene-275.58	PREDICTED: protein NRT1/ PTR FAMILY 2.8 [Fragaria vesca subsp. vesca]	-1.30282	1.84069e-18	1.78548e-17	yes	down		maker-Fvb4-4-augustus-gene-0.39	PREDICTED: dnaJ homolog subfamily B member 1-like [Fragaria vesca subsp. vesca]	1.11525	0.000897205	0.00247663	yes	up
maker-Fvb3-2-augustus-gene-178.26	PREDICTED: uncharacterized protein LOC101311553 [Fragaria vesca subsp. vesca]	-1.55069	9.25324e-67	4.03353e-65	yes	down		MSTRG.14705	PREDICTED: protein STAY-GREEN LIKE, chloroplastic [Fragaria vesca subsp. vesca]	1.03576	9.81626e-44	2.46145e-42	yes	up
maker-Fvb5-1-augustus-gene-162.31	PREDICTED: uncharacterized protein LOC101307306 [Fragaria vesca subsp. vesca]	-1.28777	2.03626e-16	1.7682e-15	yes	down		maker-Fvb6-3-augustus-gene-422.38	PREDICTED: probable receptor-like protein kinase At1g67000 [Fragaria vesca subsp. vesca]	1.33759	0.000615665	0.00174665	yes	up
maker-Fvb1-4-augustus-gene-63.65	PREDICTED: pheophytinase, chloroplastic [Fragaria vesca subsp. vesca]	-1.94428	4.31258e-237	1.74737e-234	yes	down		MSTRG.7407	PREDICTED: F-box/kelch-repeat protein SKIP6 [Fragaria vesca subsp. vesca]	1.03138	0.00114278	0.00309588	yes	up
maker-Fvb7-4-augustus-gene-43.66	PREDICTED: uncharacterized protein At5g39865-like [Fragaria vesca subsp. vesca]	-2.22976	0.0137467	0.0300196	yes	down		maker-Fvb2-4-snap-gene-123.59	PREDICTED: L-ascorbate oxidase homolog [Fragaria vesca subsp. vesca]	2.14821	2.78619e-06	1.09099e-05	yes	up
maker-Fvb3-1-augustus-gene-130.45	PREDICTED: alkaline/neutral invertase E, chloroplastic [Fragaria vesca subsp. vesca]	-1.20415	3.40411e-69	1.5647e-67	yes	down		maker-Fvb3-3-snap-gene-160.35	PREDICTED: 26S proteasome non-ATPase regulatory subunit 2 homolog A-like [Fragaria vesca subsp. vesca]	2.29164	0.0038134	0.00937737	yes	up
MSTRG.31163	PREDICTED: pentatricopeptide repeat-containing protein At4g39620, chloroplastic [Fragaria vesca subsp. vesca]	-1.06491	7.35819e-17	6.56619e-16	yes	down		augustus_masked-Fvb6-1-processed-gene-0.0	PREDICTED: G-type lectin S-receptor-like serine/threonine-protein kinase At4g03230 isoform X4 [Fragaria vesca subsp. vesca]	3.99641	8.4789e-24	1.0561e-22	yes	up
maker-Fvb6-2-snap-gene-218.47	PREDICTED: non-specific lipid-transfer protein 3-like [Fragaria vesca subsp. vesca]	-1.04421	1.7612e-51	5.42674e-50	yes	down		maker-Fvb5-2-snap-gene-62.28	PREDICTED: gibberellin-regulated protein 6 [Fragaria vesca subsp. vesca]	1.38195	0.000619441	0.00175624	yes	up
augustus_masked-Fvb3-4-processed-gene-52.0	sodium-dependent phosphate transport protein 1, chloroplastic [Rosa chinensis]	-1.38092	1.26683e-125	1.45466e-123	yes	down		maker-Fvb3-4-augustus-gene-53.55	PREDICTED: serine/arginine-rich splicing factor SR45a isoform X1 [Fragaria vesca subsp. vesca]	1.32303	3.21517e-98	2.50397e-96	yes	up
maker-Fvb3-1-augustus-gene-50.31	PREDICTED: alpha-glucan phosphorylase, H isozyme [Fragaria vesca subsp. vesca]	-1.88754	5.16299e-213	1.59889e-210	yes	down		maker-Fvb1-2-snap-gene-77.53	hypothetical protein PRUPE_7G169800 [Prunus persica]	1.57294	5.3383e-52	1.66665e-50	yes	up
maker-Fvb1-4-augustus-gene-2.48	PREDICTED: transcription factor bHLH68 [Fragaria vesca subsp. vesca]	-1.20464	5.40136e-13	3.78424e-12	yes	down		maker-Fvb5-4-augustus-gene-64.45	PREDICTED: thioredoxin-like 1-2, chloroplastic [Fragaria vesca subsp. vesca]	1.7629	6.64909e-10	3.69566e-09	yes	up
augustus_masked-Fvb2-1-processed-gene-94.5	PREDICTED: uncharacterized protein LOC101295772 isoform X1 [Fragaria vesca subsp. vesca]	-2.12916	1.3981e-122	1.54743e-120	yes	down		maker-Fvb6-3-snap-gene-194.43	protein POLYCHOME-like [Rosa chinensis]	1.16767	2.18798e-07	9.63386e-07	yes	up
maker-Fvb1-4-augustus-gene-64.58	PREDICTED: putative glucose-6-phosphate 1-epimerase [Fragaria vesca subsp. vesca]	-1.04202	1.79941e-43	4.48152e-42	yes	down		MSTRG.64354	PREDICTED: lysosomal Pro-X carboxypeptidase-like isoform X2 [Pyrus x bretschneideri]	1.09976	0.00506981	0.0121527	yes	up
augustus_masked-Fvb6-4-processed-gene-142.9	PREDICTED: protein YLS9 [Fragaria vesca subsp. vesca]	-1.02913	6.75406e-19	6.70203e-18	yes	down		augustus_masked-Fvb1-2-processed-gene-19.7	PREDICTED: multiprotein-bridging factor 1c [Fragaria vesca subsp. vesca]	2.21869	3.75047e-08	1.78289e-07	yes	up
maker-Fvb3-2-augustus-gene-27.64	PREDICTED: E3 ubiquitin-protein ligase COP1-like isoform X1 [Fragaria vesca subsp. vesca]	-2.16651	6.90158e-235	2.73612e-232	yes	down		MSTRG.48347	PREDICTED: probable complex I intermediate-associated protein 30 [Fragaria vesca subsp. vesca]	1.05028	4.77963e-08	2.25153e-07	yes	up
MSTRG.2132	PREDICTED: GATA transcription factor 21 [Fragaria vesca subsp. vesca]	-1.17769	7.15778e-63	2.9066e-61	yes	down		maker-Fvb7-2-snap-gene-142.63	PREDICTED: 5&apos;-3&apos; exoribonuclease 3-like isoform X1 [Fragaria vesca subsp. vesca]	2.38413	2.14881e-10	1.24278e-09	yes	up
snap_masked-Fvb6-1-processed-gene-25.27	PREDICTED: WAT1-related protein At3g28050-like [Fragaria vesca subsp. vesca]	-1.44074	0.00466575	0.0112694	yes	down		maker-Fvb2-2-snap-gene-23.41	PREDICTED: putative receptor-like protein kinase At4g00960 isoform X1 [Fragaria vesca subsp. vesca]	1.84554	0.0178975	0.0380713	yes	up
maker-Fvb3-1-augustus-gene-45.35	PREDICTED: LOW QUALITY PROTEIN: lysine histidine transporter-like 6 [Fragaria vesca subsp. vesca]	-1.05223	0.00328844	0.00819646	yes	down		maker-Fvb5-1-augustus-gene-235.26	PREDICTED: chlorophyll a-b binding protein CP24 10A, chloroplastic [Fragaria vesca subsp. vesca]	1.10924	7.02499e-53	2.23884e-51	yes	up
maker-Fvb4-4-augustus-gene-16.54	PREDICTED: transcription factor bHLH90 [Fragaria vesca subsp. vesca]	-2.75061	1.18254e-37	2.45354e-36	yes	down		augustus_masked-Fvb1-2-processed-gene-147.0	PREDICTED: cyclin-SDS [Fragaria vesca subsp. vesca]	1.10855	1.274e-18	1.24634e-17	yes	up
maker-Fvb7-4-augustus-gene-95.37	transcriptional activator Myb [Fragaria vesca]	-1.83464	1.42057e-07	6.37543e-07	yes	down		maker-Fvb4-2-augustus-gene-73.40	WRKY DNA binding protein [Fragaria x ananassa]	1.08833	0.00199673	0.00517809	yes	up
MSTRG.63403	PREDICTED: uncharacterized protein LOC101298658 [Fragaria vesca subsp. vesca]	-1.47394	2.18105e-23	2.67045e-22	yes	down		MSTRG.56466	PREDICTED: basic leucine zipper 34 [Fragaria vesca subsp. vesca]	3.74638	1.89417e-104	1.65764e-102	yes	up
maker-Fvb3-2-augustus-gene-25.49	PREDICTED: peroxisomal membrane protein PMP22-like [Fragaria vesca subsp. vesca]	-1.14609	2.46302e-37	5.06798e-36	yes	down		maker-Fvb5-4-augustus-gene-0.34	PREDICTED: protein NRT1/ PTR FAMILY 6.3 isoform X1 [Fragaria vesca subsp. vesca]	1.12594	5.26453e-16	4.47019e-15	yes	up
maker-Fvb7-2-augustus-gene-165.14	PREDICTED: pentatricopeptide repeat-containing protein At1g01970 [Fragaria vesca subsp. vesca]	-1.04905	4.36639e-22	5.06372e-21	yes	down		maker-Fvb6-1-augustus-gene-156.38	PREDICTED: C-terminal binding protein AN [Fragaria vesca subsp. vesca]	1.96859	3.1348e-26	4.34816e-25	yes	up
maker-Fvb1-1-augustus-gene-243.67	uncharacterized protein LOC112188152 [Rosa chinensis]	-2.07509	3.62058e-50	1.0718e-48	yes	down		augustus_masked-Fvb5-2-processed-gene-170.10	PREDICTED: uncharacterized protein LOC101310319 [Fragaria vesca subsp. vesca]	2.97419	5.20723e-08	2.44644e-07	yes	up
maker-Fvb2-4-augustus-gene-234.47	PREDICTED: uncharacterized protein LOC101303665 [Fragaria vesca subsp. vesca]	-3.43647	1.55121e-41	3.64336e-40	yes	down		snap_masked-Fvb5-1-processed-gene-67.45	PREDICTED: uncharacterized protein LOC105353440 [Fragaria vesca subsp. vesca]	1.06606	0.0161863	0.034779	yes	up
augustus_masked-Fvb6-2-processed-gene-6.6	PREDICTED: B-box zinc finger protein 32 [Fragaria vesca subsp. vesca]	-1.93811	6.9709e-06	2.60346e-05	yes	down		maker-Fvb6-1-augustus-gene-57.64	hypothetical protein RchiOBHm_Chr6g0261061 [Rosa chinensis]	1.52798	0.000101795	0.000326375	yes	up
maker-Fvb4-1-augustus-gene-135.50	PREDICTED: probable pectate lyase 5 [Fragaria vesca subsp. vesca]	-1.01622	8.13758e-07	3.37753e-06	yes	down		maker-Fvb4-2-augustus-gene-28.36	CLK4-associating serine/arginine rich protein isoform X4 [Rosa chinensis]	1.22402	0.000465477	0.00134847	yes	up
maker-Fvb3-3-augustus-gene-145.24	PREDICTED: uncharacterized protein LOC101311538 [Fragaria vesca subsp. vesca]	-1.42491	8.57349e-50	2.52015e-48	yes	down		snap_masked-Fvb2-3-processed-gene-221.16	PREDICTED: squalene monooxygenase-like [Fragaria vesca subsp. vesca]	3.305	0.00328388	0.00818555	yes	up
maker-Fvb5-3-augustus-gene-193.50	PREDICTED: transmembrane protein DDB_G0273707/DDB_G0273361 [Fragaria vesca subsp. vesca]	-1.99653	1.0565e-115	1.06316e-113	yes	down		augustus_masked-Fvb6-1-processed-gene-291.6	PREDICTED: BAHD acyltransferase DCR [Fragaria vesca subsp. vesca]	2.86761	5.32278e-12	3.47409e-11	yes	up
MSTRG.41487	PREDICTED: two-component response regulator-like APRR1 [Fragaria vesca subsp. vesca]	-1.98778	1.77365e-27	2.5886e-26	yes	down		augustus_masked-Fvb1-3-processed-gene-87.10	PREDICTED: patatin-like protein 2 [Fragaria vesca subsp. vesca]	1.49959	1.98484e-07	8.77385e-07	yes	up
augustus_masked-Fvb2-1-processed-gene-109.0	PREDICTED: putative lipid-transfer protein DIR1 [Fragaria vesca subsp. vesca]	-2.73889	1.74987e-12	1.18421e-11	yes	down		maker-Fvb2-1-augustus-gene-123.34	PREDICTED: UBX domain-containing protein 1 [Fragaria vesca subsp. vesca]	1.80291	0.000865523	0.00239644	yes	up
maker-Fvb3-2-snap-gene-265.44	PREDICTED: ATP-dependent zinc metalloprotease FTSH 9, chloroplastic [Fragaria vesca subsp. vesca]	-1.72292	5.13543e-149	7.9652e-147	yes	down		snap_masked-Fvb6-3-processed-gene-59.21	PREDICTED: MORC family CW-type zinc finger protein 3-like [Fragaria vesca subsp. vesca]	4.63723	0.00621968	0.0146543	yes	up
maker-Fvb3-4-snap-gene-193.56	PREDICTED: uncharacterized protein LOC101309127 [Fragaria vesca subsp. vesca]	-1.0468	5.09618e-06	1.93401e-05	yes	down		maker-Fvb6-1-augustus-gene-6.52	PREDICTED: UPF0496 protein At3g19330 [Fragaria vesca subsp. vesca]	1.64424	1.33805e-42	3.24977e-41	yes	up
augustus_masked-Fvb6-3-processed-gene-18.9	PREDICTED: cysteine-rich receptor-like protein kinase 42 [Fragaria vesca subsp. vesca]	-2.38845	0.00630239	0.0148287	yes	down		maker-Fvb5-2-augustus-gene-114.40	PREDICTED: RING-H2 finger protein ATL22-like isoform X1 [Fragaria vesca subsp. vesca]	1.13652	2.63845e-08	1.27261e-07	yes	up
augustus_masked-Fvb6-4-processed-gene-40.2	PREDICTED: uncharacterized protein LOC101305414 [Fragaria vesca subsp. vesca]	-1.38739	4.68089e-124	5.25036e-122	yes	down		MSTRG.8729	PREDICTED: 3-hydroxy-3-methylglutaryl-coenzyme A reductase 1-like [Fragaria vesca subsp. vesca]	3.05574	5.83457e-30	9.46456e-29	yes	up
maker-Fvb6-2-augustus-gene-230.63	PREDICTED: galactinol synthase 2-like [Fragaria vesca subsp. vesca]	-3.65436	2.29625e-200	6.34233e-198	yes	down		maker-Fvb4-3-augustus-gene-117.34	PREDICTED: ABC transporter B family member 11-like [Fragaria vesca subsp. vesca]	1.75475	5.22641e-22	6.04507e-21	yes	up
MSTRG.61342	PREDICTED: proline-rich receptor-like protein kinase PERK9 [Pyrus x bretschneideri]	-1.63522	3.32384e-07	1.44109e-06	yes	down		snap_masked-Fvb6-1-processed-gene-178.15	PREDICTED: E3 ubiquitin-protein ligase ATL41-like [Fragaria vesca subsp. vesca]	2.33309	0.00954385	0.0215995	yes	up
augustus_masked-Fvb1-2-processed-gene-72.5	PREDICTED: uncharacterized protein LOC101310938 [Fragaria vesca subsp. vesca]	-2.03023	0.0080435	0.0185253	yes	down		maker-Fvb6-2-augustus-gene-274.46	PREDICTED: uncharacterized protein LOC101301892 [Fragaria vesca subsp. vesca]	1.10055	1.38321e-08	6.83511e-08	yes	up
maker-Fvb1-4-snap-gene-21.70	putative glycerol-3-phosphate transporter 5 [Rosa chinensis]	-1.04999	2.29845e-45	6.01772e-44	yes	down		MSTRG.45417	PREDICTED: cyclic nucleotide-gated ion channel 1-like [Fragaria vesca subsp. vesca]	2.96051	0	0	yes	up
maker-Fvb6-2-augustus-gene-225.36	PREDICTED: DEAD-box ATP-dependent RNA helicase 3, chloroplastic [Fragaria vesca subsp. vesca]	-1.99241	1.25966e-235	5.05932e-233	yes	down		augustus_masked-Fvb3-2-processed-gene-47.2	PREDICTED: ethylene-responsive transcription factor 4 [Fragaria vesca subsp. vesca]	1.77008	5.71866e-28	8.53309e-27	yes	up
maker-Fvb6-3-snap-gene-410.84	PREDICTED: anthocyanidin 3-O-glucoside 2&apos;&apos;-O-glucosyltransferase-like [Fragaria vesca subsp. vesca]	-3.56296	3.3104e-14	2.51468e-13	yes	down		maker-Fvb6-1-snap-gene-196.36	PREDICTED: cleavage stimulating factor 64-like [Fragaria vesca subsp. vesca]	1.42595	7.24244e-08	3.35413e-07	yes	up
maker-Fvb7-3-augustus-gene-60.45	PREDICTED: gibberellin 2-beta-dioxygenase 2 [Fragaria vesca subsp. vesca]	-1.00692	4.17435e-09	2.17038e-08	yes	down		maker-Fvb2-2-snap-gene-38.53	SNARE-interacting protein KEULE-like [Rosa chinensis]	1.41927	1.43917e-27	2.10946e-26	yes	up
MSTRG.21167	PREDICTED: LOW QUALITY PROTEIN: serine acetyltransferase 1, chloroplastic-like [Fragaria vesca subsp. vesca]	-2.09457	1.70197e-82	1.00218e-80	yes	down		maker-Fvb5-3-augustus-gene-55.56	valine--tRNA ligase, mitochondrial 1 [Rosa chinensis]	1.38019	1.77881e-05	6.32569e-05	yes	up
maker-Fvb6-4-snap-gene-76.36	PREDICTED: macrophage migration inhibitory factor homolog [Fragaria vesca subsp. vesca]	-1.17016	5.64105e-78	3.03593e-76	yes	down		augustus_masked-Fvb4-3-processed-gene-28.5	PREDICTED: uncharacterized protein LOC101294061 [Fragaria vesca subsp. vesca]	2.3626	8.76394e-15	6.90959e-14	yes	up
maker-Fvb1-2-augustus-gene-7.39	PREDICTED: uncharacterized membrane protein C776.05 [Fragaria vesca subsp. vesca]	-1.49507	3.73714e-28	5.61371e-27	yes	down		snap_masked-Fvb5-3-processed-gene-28.31	PREDICTED: protein EXORDIUM-like [Fragaria vesca subsp. vesca]	3.44518	9.02077e-52	2.79358e-50	yes	up
maker-Fvb2-1-snap-gene-244.70	PREDICTED: 1,4-alpha-glucan-branching enzyme 1, chloroplastic/amyloplastic-like [Fragaria vesca subsp. vesca]	-1.67667	1.06638e-98	8.36871e-97	yes	down		augustus_masked-Fvb4-3-processed-gene-95.2	PREDICTED: putative multidrug resistance protein [Fragaria vesca subsp. vesca]	4.56931	0.017686	0.0376505	yes	up
MSTRG.38107	PREDICTED: extensin-2-like isoform X3 [Pyrus x bretschneideri]	-1.74038	1.209e-105	1.08065e-103	yes	down		MSTRG.37836	PREDICTED: uncharacterized protein LOC101294557 isoform X1 [Fragaria vesca subsp. vesca]	1.30305	4.65239e-16	3.95954e-15	yes	up
maker-Fvb3-3-augustus-gene-4.52	PREDICTED: uncharacterized protein LOC101303095 [Fragaria vesca subsp. vesca]	-1.13493	0.000381762	0.0011206	yes	down		MSTRG.8231	--	3.13685	0.000236677	0.000718127	yes	up
maker-Fvb1-3-snap-gene-178.38	PREDICTED: NAD-dependent protein deacetylase SRT2 isoform X1 [Fragaria vesca subsp. vesca]	-1.33923	6.0065e-50	1.77467e-48	yes	down		MSTRG.40850	PREDICTED: uncharacterized protein LOC101311892 [Fragaria vesca subsp. vesca]	1.01271	3.09332e-20	3.27326e-19	yes	up
maker-Fvb2-1-augustus-gene-230.48	PREDICTED: profilin [Fragaria vesca subsp. vesca]	-1.1963	5.33987e-35	1.01622e-33	yes	down		maker-Fvb3-3-augustus-gene-144.41	PREDICTED: thioredoxin-like protein 4B [Fragaria vesca subsp. vesca]	2.26707	2.52341e-53	8.13507e-52	yes	up
augustus_masked-Fvb6-1-processed-gene-13.1	PREDICTED: uncharacterized protein LOC101294787 [Fragaria vesca subsp. vesca]	-1.21359	2.65689e-11	1.64581e-10	yes	down		maker-Fvb5-1-snap-gene-107.69	PREDICTED: uncharacterized protein LOC101292421 [Fragaria vesca subsp. vesca]	1.41409	7.24316e-34	1.33293e-32	yes	up
maker-Fvb1-4-augustus-gene-2.54	PREDICTED: cyclin-dependent kinase F-1 [Fragaria vesca subsp. vesca]	-1.05408	2.06079e-12	1.389e-11	yes	down		maker-Fvb7-1-snap-gene-157.48	LOW QUALITY PROTEIN: uncharacterized protein LOC112167556 [Rosa chinensis]	1.25086	4.69383e-07	2.00074e-06	yes	up
maker-Fvb4-3-augustus-gene-7.34	PREDICTED: non-specific lipid-transfer protein 4 [Fragaria vesca subsp. vesca]	-2.03354	2.71377e-16	2.34038e-15	yes	down		maker-Fvb1-4-augustus-gene-171.18	PREDICTED: glycogen synthase kinase-3 homolog MsK-3 isoform X1 [Fragaria vesca subsp. vesca]	1.69813	2.95078e-31	5.00924e-30	yes	up
augustus_masked-Fvb2-3-processed-gene-70.4	PREDICTED: uncharacterized protein LOC101310484 [Fragaria vesca subsp. vesca]	-1.00697	3.01382e-25	3.99595e-24	yes	down		MSTRG.34486	PREDICTED: ADP-ribosylation factor-like protein 2 [Fragaria vesca subsp. vesca]	1.92024	1.68123e-139	2.30796e-137	yes	up
maker-Fvb2-2-augustus-gene-221.56	PREDICTED: cleavage and polyadenylation specificity factor subunit 6 [Fragaria vesca subsp. vesca]	-2.68929	3.80557e-11	2.33099e-10	yes	down		maker-Fvb5-2-augustus-gene-27.53	PREDICTED: probable WRKY transcription factor 53 [Fragaria vesca subsp. vesca]	2.29068	1.98516e-29	3.15676e-28	yes	up
maker-Fvb7-2-augustus-gene-39.40	cystatin CPI-1 [Fragaria x ananassa]	-1.27835	2.2596e-46	6.09469e-45	yes	down		maker-Fvb5-4-augustus-gene-22.42	PREDICTED: uncharacterized protein LOC101303711 [Fragaria vesca subsp. vesca]	3.02334	2.29345e-08	1.11209e-07	yes	up
maker-Fvb7-3-augustus-gene-118.31	PREDICTED: gibberellin 2-beta-dioxygenase 7 [Fragaria vesca subsp. vesca]	-1.0135	4.92731e-32	8.5881e-31	yes	down		maker-Fvb5-3-augustus-gene-244.38	PREDICTED: jmjC domain-containing protein 4 [Fragaria vesca subsp. vesca]	1.63617	6.32496e-24	7.92891e-23	yes	up
augustus_masked-Fvb2-1-processed-gene-140.11	PREDICTED: inorganic phosphate transporter 1-4 [Fragaria vesca subsp. vesca]	-1.47782	4.28074e-84	2.62659e-82	yes	down		snap_masked-Fvb6-1-processed-gene-58.27	G-type lectin S-receptor-like serine/threonine-protein kinase At4g03230 [Rosa chinensis]	1.2784	8.85397e-12	5.68921e-11	yes	up
maker-Fvb4-4-augustus-gene-134.23	PREDICTED: folate-biopterin transporter 1, chloroplastic [Fragaria vesca subsp. vesca]	-1.10985	8.35592e-19	8.25681e-18	yes	down		maker-Fvb5-3-augustus-gene-52.42	PREDICTED: phosphoenolpyruvate carboxykinase [ATP]-like [Fragaria vesca subsp. vesca]	1.77683	7.03788e-73	3.41772e-71	yes	up
augustus_masked-Fvb3-3-processed-gene-5.8	PREDICTED: glycine-rich protein 2 [Fragaria vesca subsp. vesca]	-1.07516	0.023531	0.0484897	yes	down		maker-Fvb3-2-snap-gene-77.57	PREDICTED: uncharacterized protein LOC101307575 [Fragaria vesca subsp. vesca]	2.28663	1.5579e-62	6.26814e-61	yes	up
maker-Fvb2-2-augustus-gene-41.47	PREDICTED: DIS3-like exonuclease 2 [Fragaria vesca subsp. vesca]	-2.01675	1.91799e-58	7.02826e-57	yes	down		maker-Fvb7-1-snap-gene-255.50	PREDICTED: putative disease resistance protein RGA3 [Fragaria vesca subsp. vesca]	1.34692	0.00262047	0.0066584	yes	up
maker-Fvb4-1-augustus-gene-88.37	PREDICTED: pirin-like protein [Fragaria vesca subsp. vesca]	-1.04096	4.71232e-12	3.08298e-11	yes	down		MSTRG.59665	PREDICTED: ethylene-responsive transcription factor ERF105-like [Fragaria vesca subsp. vesca]	3.88851	4.57265e-241	1.99324e-238	yes	up
maker-Fvb3-1-snap-gene-151.38	PREDICTED: fatty acyl-CoA reductase 3-like [Fragaria vesca subsp. vesca]	-1.30743	7.35036e-10	4.07165e-09	yes	down		augustus_masked-Fvb3-1-processed-gene-270.2	PREDICTED: uncharacterized protein LOC101293666 [Fragaria vesca subsp. vesca]	1.82294	0.000177269	0.000547738	yes	up
maker-Fvb6-2-augustus-gene-236.43	PREDICTED: uncharacterized protein LOC101290777 isoform X3 [Fragaria vesca subsp. vesca]	-1.24339	5.17312e-15	4.13598e-14	yes	down		maker-Fvb7-1-snap-gene-16.35	PREDICTED: pentatricopeptide repeat-containing protein At4g20740 [Fragaria vesca subsp. vesca]	1.06031	1.05171e-10	6.23637e-10	yes	up
augustus_masked-Fvb6-1-processed-gene-294.7	PREDICTED: probable pyridoxal 5&apos;-phosphate synthase subunit PDX1 [Fragaria vesca subsp. vesca]	-2.08699	6.42755e-09	3.28196e-08	yes	down		snap_masked-Fvb7-3-processed-gene-90.24	PREDICTED: probable pectate lyase 13 [Fragaria vesca subsp. vesca]	1.44154	5.18215e-05	0.000173384	yes	up
augustus_masked-Fvb7-4-processed-gene-211.3	PREDICTED: probable polyamine oxidase 5 [Fragaria vesca subsp. vesca]	-1.20018	8.15389e-08	3.76035e-07	yes	down		snap_masked-Fvb3-2-processed-gene-267.46	villin-1 [Prunus persica]	1.0266	5.96227e-05	0.000197952	yes	up
snap_masked-Fvb7-3-processed-gene-167.22	PREDICTED: uncharacterized protein LOC103956291 [Pyrus x bretschneideri]	-1.19693	1.48344e-07	6.64302e-07	yes	down		maker-Fvb2-2-snap-gene-2.54	PREDICTED: chromosome-associated kinesin KIF4A [Fragaria vesca subsp. vesca]	1.06618	1.20474e-37	2.49735e-36	yes	up
augustus_masked-Fvb5-1-processed-gene-1.5	PREDICTED: uncharacterized protein LOC101312632 [Fragaria vesca subsp. vesca]	-2.07536	4.59307e-08	2.16738e-07	yes	down		maker-Fvb2-2-augustus-gene-145.34	PREDICTED: serine/threonine-protein phosphatase 2A activator-like [Fragaria vesca subsp. vesca]	1.43484	1.11557e-09	6.09008e-09	yes	up
maker-Fvb5-4-augustus-gene-10.49	PREDICTED: probable DEAD-box ATP-dependent RNA helicase 48 isoform X1 [Fragaria vesca subsp. vesca]	-2.04051	0.00464096	0.0112174	yes	down		maker-Fvb4-1-augustus-gene-193.38	PREDICTED: proteoglycan 4-like [Fragaria vesca subsp. vesca]	1.27454	1.08712e-41	2.5671e-40	yes	up
maker-Fvb1-1-augustus-gene-119.27	PREDICTED: uncharacterized protein LOC101314134 [Fragaria vesca subsp. vesca]	-1.10651	1.39933e-38	2.99104e-37	yes	down		MSTRG.16148	PREDICTED: mitogen-activated protein kinase kinase kinase 1-like [Fragaria vesca subsp. vesca]	2.65751	0.0130418	0.0286326	yes	up
MSTRG.42369	PREDICTED: uncharacterized protein LOC101292210 [Fragaria vesca subsp. vesca]	-1.26327	1.0203e-08	5.1113e-08	yes	down		snap_masked-Fvb3-1-processed-gene-305.30	PREDICTED: uncharacterized protein LOC101291377 [Fragaria vesca subsp. vesca]	1.26125	0.0102457	0.0230429	yes	up
maker-Fvb6-2-snap-gene-219.24	PREDICTED: uncharacterized protein LOC101315446 isoform X1 [Fragaria vesca subsp. vesca]	-1.21424	1.41611e-24	1.82395e-23	yes	down		MSTRG.11042	PREDICTED: heat stress transcription factor A-7a [Fragaria vesca subsp. vesca]	2.81774	3.20776e-246	1.46785e-243	yes	up
maker-Fvb4-4-augustus-gene-39.47	PREDICTED: uncharacterized protein At1g04910-like [Fragaria vesca subsp. vesca]	-2.19057	3.79255e-82	2.22606e-80	yes	down		maker-Fvb7-3-augustus-gene-195.26	PREDICTED: uncharacterized protein LOC101298171 isoform X2 [Fragaria vesca subsp. vesca]	1.13878	4.73824e-15	3.79753e-14	yes	up
MSTRG.43842	PREDICTED: sacsin [Fragaria vesca subsp. vesca]	-1.29628	1.49509e-57	5.38209e-56	yes	down		augustus_masked-Fvb6-1-processed-gene-134.13	PREDICTED: putative white-brown complex homolog protein 30 [Fragaria vesca subsp. vesca]	2.36909	7.93147e-13	5.4945e-12	yes	up
snap_masked-Fvb6-4-processed-gene-306.30	PREDICTED: zinc finger CCCH domain-containing protein 3 [Fragaria vesca subsp. vesca]	-1.37288	1.66043e-14	1.28682e-13	yes	down		maker-Fvb4-1-snap-gene-43.25	PREDICTED: origin of replication complex subunit 5-like [Fragaria vesca subsp. vesca]	1.36112	0.0164218	0.0352308	yes	up
maker-Fvb1-1-augustus-gene-169.34	2-alkenal reductase (NADP(+)-dependent)-like [Rosa chinensis]	-1.50368	1.19702e-36	2.41653e-35	yes	down		MSTRG.11781	PREDICTED: protein TPX2 isoform X2 [Fragaria vesca subsp. vesca]	1.38508	4.93988e-47	1.35506e-45	yes	up
MSTRG.63976	PREDICTED: phosphoglucan phosphatase LSF2, chloroplastic [Fragaria vesca subsp. vesca]	-1.31478	7.58181e-69	3.4522e-67	yes	down		MSTRG.45561	PREDICTED: regulatory protein NPR3-like [Fragaria vesca subsp. vesca]	1.5867	4.88292e-49	1.40831e-47	yes	up
maker-Fvb3-2-augustus-gene-99.44	PREDICTED: B-box zinc finger protein 22 [Fragaria vesca subsp. vesca]	-1.84328	1.17096e-80	6.59928e-79	yes	down		MSTRG.56270	PREDICTED: extensin-like [Pyrus x bretschneideri]	1.268	4.37575e-11	2.66974e-10	yes	up
maker-Fvb4-2-snap-gene-105.55	PREDICTED: LEC14B homolog [Fragaria vesca subsp. vesca]	-1.06275	1.27551e-21	1.44531e-20	yes	down		augustus_masked-Fvb6-1-processed-gene-41.7	PREDICTED: protein EXORDIUM-like 5 [Fragaria vesca subsp. vesca]	1.50367	9.43727e-06	3.47021e-05	yes	up
maker-Fvb4-3-augustus-gene-42.59	PREDICTED: uncharacterized protein At1g04910-like [Fragaria vesca subsp. vesca]	-2.03442	1.07377e-39	2.37749e-38	yes	down		maker-Fvb4-2-snap-gene-10.64	PREDICTED: metalloendoproteinase 1-like [Fragaria vesca subsp. vesca]	1.8499	4.45759e-16	3.79798e-15	yes	up
maker-Fvb6-3-augustus-gene-162.37	PREDICTED: uncharacterized protein LOC101299312 [Fragaria vesca subsp. vesca]	-1.52235	1.91043e-07	8.45958e-07	yes	down		maker-Fvb5-3-augustus-gene-119.28	PREDICTED: uncharacterized protein LOC101311892 [Fragaria vesca subsp. vesca]	1.01271	3.09332e-20	3.27326e-19	yes	up
maker-Fvb7-1-augustus-gene-272.45	PREDICTED: ubiquinol-cytochrome-c reductase complex assembly factor 1 [Fragaria vesca subsp. vesca]	-1.33591	0.00330666	0.00823762	yes	down		maker-Fvb1-3-snap-gene-10.65	PREDICTED: uncharacterized protein LOC101298453 [Fragaria vesca subsp. vesca]	1.58952	9.30418e-18	8.69588e-17	yes	up
maker-Fvb3-3-augustus-gene-253.33	PREDICTED: omega-3 fatty acid desaturase, endoplasmic reticulum [Fragaria vesca subsp. vesca]	-1.13246	7.55751e-48	2.11665e-46	yes	down		maker-Fvb1-2-augustus-gene-230.22	putative dual-specificity kinase TKL-Pl-5 family [Rosa chinensis]	1.02367	1.09509e-26	1.54315e-25	yes	up
maker-Fvb3-4-snap-gene-121.34	pentatricopeptide repeat-containing protein At3g16610-like [Rosa chinensis]	-1.14909	0.00205066	0.00530449	yes	down		maker-Fvb4-2-augustus-gene-14.46	PREDICTED: ubiquitin-like-specific protease 1D isoform X2 [Fragaria vesca subsp. vesca]	1.0231	3.1027e-14	2.36178e-13	yes	up
maker-Fvb5-4-augustus-gene-222.39	PREDICTED: purine permease 3-like [Fragaria vesca subsp. vesca]	-2.25363	1.33641e-13	9.78489e-13	yes	down		augustus_masked-Fvb6-2-processed-gene-215.6	PREDICTED: wound-induced protein 1 [Fragaria vesca subsp. vesca]	3.56947	7.82999e-26	1.06645e-24	yes	up
maker-Fvb6-4-augustus-gene-295.52	PREDICTED: mavicyanin-like [Fragaria vesca subsp. vesca]	-3.37602	0.0155938	0.0336276	yes	down		maker-Fvb3-1-snap-gene-266.39	PREDICTED: metal tolerance protein 11 [Fragaria vesca subsp. vesca]	1.50299	8.3744e-46	2.22228e-44	yes	up
MSTRG.46326	uncharacterized protein LOC112180186 [Rosa chinensis]	-5.84294	4.91524e-05	0.000164946	yes	down		MSTRG.41804	PREDICTED: uncharacterized protein LOC101301684 isoform X1 [Fragaria vesca subsp. vesca]	1.55197	6.25268e-08	2.91616e-07	yes	up
MSTRG.59015	PREDICTED: auxin-induced protein X15-like [Fragaria vesca subsp. vesca]	-1.02322	1.59611e-08	7.84714e-08	yes	down		maker-Fvb6-4-snap-gene-143.23	kinesin-like protein KIN-7N [Rosa chinensis]	1.06062	2.11774e-16	1.83825e-15	yes	up
augustus_masked-Fvb5-4-processed-gene-194.9	PREDICTED: anthocyanidin 5,3-O-glucosyltransferase-like [Fragaria vesca subsp. vesca]	-1.65558	2.09391e-09	1.11659e-08	yes	down		maker-Fvb6-2-augustus-gene-46.33	PREDICTED: protein IWS1 homolog A [Fragaria vesca subsp. vesca]	2.00487	1.11137e-07	5.04814e-07	yes	up
maker-Fvb6-2-snap-gene-342.75	PREDICTED: probable threonine--tRNA ligase, cytoplasmic [Fragaria vesca subsp. vesca]	-1.04204	3.36501e-07	1.45825e-06	yes	down		maker-Fvb5-3-augustus-gene-181.46	PREDICTED: dnaJ homolog subfamily A member 3, mitochondrial isoform X1 [Fragaria vesca subsp. vesca]	1.1127	2.92301e-10	1.67245e-09	yes	up
maker-Fvb3-3-augustus-gene-67.33	PREDICTED: zingipain-2-like [Fragaria vesca subsp. vesca]	-1.30389	9.8025e-27	1.38558e-25	yes	down		MSTRG.18332	PREDICTED: zinc finger protein CONSTANS-LIKE 4 [Fragaria vesca subsp. vesca]	1.72157	1.34611e-25	1.81568e-24	yes	up
maker-Fvb3-1-augustus-gene-260.37	PREDICTED: twinkle homolog protein, chloroplastic/mitochondrial isoform X2 [Fragaria vesca subsp. vesca]	-1.04438	2.2367e-17	2.05394e-16	yes	down		augustus_masked-Fvb7-1-processed-gene-175.11	PREDICTED: origin of replication complex subunit 5-like [Fragaria vesca subsp. vesca]	2.10482	0.0030614	0.00767655	yes	up
maker-Fvb5-1-snap-gene-297.61	PREDICTED: DELLA protein RGL1-like [Fragaria vesca subsp. vesca]	-1.22251	3.83052e-05	0.000130367	yes	down		augustus_masked-Fvb1-4-processed-gene-205.3	PREDICTED: putative ABC1 protein At2g40090 [Fragaria vesca subsp. vesca]	1.00722	0.0188288	0.0398351	yes	up
maker-Fvb2-2-augustus-gene-99.54	PREDICTED: monosaccharide-sensing protein 2 [Fragaria vesca subsp. vesca]	-1.09912	1.56842e-19	1.60661e-18	yes	down		augustus_masked-Fvb5-3-processed-gene-38.12	PREDICTED: putative DNA-binding protein ESCAROLA [Fragaria vesca subsp. vesca]	3.77135	5.59841e-10	3.12983e-09	yes	up
maker-Fvb2-2-augustus-gene-92.27	PREDICTED: dCTP pyrophosphatase 1-like [Fragaria vesca subsp. vesca]	-1.03182	0.000198815	0.000609805	yes	down		augustus_masked-Fvb2-1-processed-gene-249.7	PREDICTED: uncharacterized protein LOC101304061 [Fragaria vesca subsp. vesca]	1.60565	0.00213648	0.0055104	yes	up
augustus_masked-Fvb5-4-processed-gene-12.16	PREDICTED: glutamate--cysteine ligase, chloroplastic [Fragaria vesca subsp. vesca]	-1.10562	1.17685e-36	2.37737e-35	yes	down		MSTRG.26498	PREDICTED: protein SMG7L [Fragaria vesca subsp. vesca]	1.33101	3.29914e-21	3.66608e-20	yes	up
maker-Fvb7-2-snap-gene-123.67	PREDICTED: delta(8)-fatty-acid desaturase 1-like [Fragaria vesca subsp. vesca]	-1.34997	1.51347e-47	4.19666e-46	yes	down		augustus_masked-Fvb3-3-processed-gene-48.2	PREDICTED: protein argonaute 2 [Fragaria vesca subsp. vesca]	1.36612	0.00282382	0.00712842	yes	up
maker-Fvb4-2-augustus-gene-208.41	PREDICTED: uncharacterized protein LOC101305665 [Fragaria vesca subsp. vesca]	-1.07916	8.82117e-49	2.52831e-47	yes	down		MSTRG.9752	putative transcription factor WD40-like family [Rosa chinensis]	1.48119	5.29903e-27	7.5952e-26	yes	up
maker-Fvb2-4-augustus-gene-70.44	PREDICTED: uncharacterized protein LOC101292168 [Fragaria vesca subsp. vesca]	-1.64102	2.02917e-18	1.96458e-17	yes	down		snap_masked-Fvb6-1-processed-gene-54.45	uncharacterized protein LOC18784430 [Prunus persica]	2.6633	5.0327e-07	2.13884e-06	yes	up
snap_masked-Fvb6-2-processed-gene-184.23	PREDICTED: glutathione S-transferase L3-like isoform X1 [Fragaria vesca subsp. vesca]	-1.7751	1.14881e-135	1.5138e-133	yes	down		maker-Fvb1-1-augustus-gene-262.40	PREDICTED: probable galactinol--sucrose galactosyltransferase 6 [Fragaria vesca subsp. vesca]	3.69103	0.00341792	0.00848515	yes	up
maker-Fvb1-2-augustus-gene-83.56	PREDICTED: dehydrin Xero 2 [Fragaria vesca subsp. vesca]	-3.5217	1.94684e-08	9.49832e-08	yes	down		augustus_masked-Fvb3-4-processed-gene-240.8	PREDICTED: cationic amino acid transporter 1-like [Fragaria vesca subsp. vesca]	1.55779	2.80164e-37	5.75572e-36	yes	up
snap_masked-Fvb5-3-processed-gene-127.7	PREDICTED: uncharacterized protein LOC101314385 isoform X1 [Fragaria vesca subsp. vesca]	-1.64065	1.62466e-10	9.4888e-10	yes	down		maker-Fvb3-1-augustus-gene-63.34	PREDICTED: sodium-coupled neutral amino acid transporter 5-like [Fragaria vesca subsp. vesca]	2.88161	0.00490399	0.0117891	yes	up
maker-Fvb1-3-snap-gene-263.44	PREDICTED: uncharacterized protein LOC101310650 [Fragaria vesca subsp. vesca]	-1.40624	2.23644e-06	8.84915e-06	yes	down		maker-Fvb5-4-snap-gene-198.36	putative powdery mildew resistance protein, RPW8 [Rosa chinensis]	4.67694	6.71608e-31	1.12805e-29	yes	up
maker-Fvb1-3-augustus-gene-15.69	PREDICTED: heme oxygenase 1, chloroplastic [Fragaria vesca subsp. vesca]	-1.05608	8.25458e-32	1.4298e-30	yes	down		maker-Fvb1-4-augustus-gene-18.66	PREDICTED: ubiquitin carboxyl-terminal hydrolase 22-like [Fragaria vesca subsp. vesca]	1.3652	1.54688e-25	2.08006e-24	yes	up
augustus_masked-Fvb6-3-processed-gene-67.2	PREDICTED: uncharacterized protein LOC101312994 [Fragaria vesca subsp. vesca]	-1.16418	7.58014e-09	3.84976e-08	yes	down		augustus_masked-Fvb4-3-processed-gene-134.13	PREDICTED: RING-H2 finger protein ATL2 [Fragaria vesca subsp. vesca]	3.38389	3.83682e-83	2.305e-81	yes	up
maker-Fvb6-1-augustus-gene-201.55	PREDICTED: 18 kDa seed maturation protein [Fragaria vesca subsp. vesca]	-3.61144	2.56677e-14	1.9644e-13	yes	down		maker-Fvb5-3-augustus-gene-38.34	PREDICTED: pectinesterase-like [Fragaria vesca subsp. vesca]	1.72206	0.0169957	0.0363339	yes	up
maker-Fvb2-3-augustus-gene-173.19	PREDICTED: auxin response factor 3 [Fragaria vesca subsp. vesca]	-1.25372	6.14971e-05	0.000203822	yes	down		MSTRG.57413	PREDICTED: zinc finger protein CONSTANS-LIKE 9-like [Fragaria vesca subsp. vesca]	3.21751	3.34281e-71	1.58729e-69	yes	up
maker-Fvb6-3-snap-gene-347.71	PREDICTED: endochitinase A-like [Fragaria vesca subsp. vesca]	-2.33535	1.43675e-74	7.22505e-73	yes	down		maker-Fvb2-1-augustus-gene-33.33	PREDICTED: CDPK-related kinase 5-like [Fragaria vesca subsp. vesca]	1.5502	1.82829e-41	4.28759e-40	yes	up
maker-Fvb2-3-snap-gene-143.27	PREDICTED: putative laccase-9 [Fragaria vesca subsp. vesca]	-1.47668	1.07815e-24	1.39805e-23	yes	down		MSTRG.35494	PREDICTED: F-box protein At1g67340 [Fragaria vesca subsp. vesca]	1.87356	3.38844e-36	6.7283e-35	yes	up
MSTRG.37455	histone H1.2 [Prunus persica]	-2.79067	4.83153e-31	8.15984e-30	yes	down		maker-Fvb6-3-snap-gene-163.40	PREDICTED: organic cation/carnitine transporter 4 [Fragaria vesca subsp. vesca]	2.57615	1.92669e-05	6.82336e-05	yes	up
maker-Fvb4-4-augustus-gene-90.46	hypothetical protein RchiOBHm_Chr4g0426141 [Rosa chinensis]	-1.65377	2.47606e-34	4.61569e-33	yes	down		augustus_masked-Fvb2-1-processed-gene-229.0	PREDICTED: transcription factor MYB44-like [Fragaria vesca subsp. vesca]	2.91965	6.4798e-11	3.90324e-10	yes	up
maker-Fvb6-1-augustus-gene-363.43	PREDICTED: putative DNA-binding protein ESCAROLA [Fragaria vesca subsp. vesca]	-1.62228	4.35507e-39	9.46508e-38	yes	down		maker-Fvb6-1-augustus-gene-155.24	PREDICTED: 26.5 kDa heat shock protein, mitochondrial-like [Fragaria vesca subsp. vesca]	4.95718	4.45779e-08	2.10661e-07	yes	up
maker-Fvb6-1-snap-gene-364.59	PREDICTED: pentatricopeptide repeat-containing protein At2g01510, mitochondrial-like [Fragaria vesca subsp. vesca]	-1.21381	0.00296987	0.00746167	yes	down		maker-Fvb4-1-augustus-gene-93.35	PREDICTED: rho GDP-dissociation inhibitor 1-like [Fragaria vesca subsp. vesca]	2.16359	0.00587503	0.01392	yes	up
maker-Fvb5-2-augustus-gene-99.41	PREDICTED: uncharacterized protein LOC101304870 [Fragaria vesca subsp. vesca]	-1.0194	0.000424087	0.00123616	yes	down		augustus_masked-Fvb3-3-processed-gene-82.17	PREDICTED: protein SRG1-like [Fragaria vesca subsp. vesca]	1.48803	8.12756e-39	1.75232e-37	yes	up
maker-Fvb6-2-augustus-gene-287.49	PREDICTED: probable galactinol--sucrose galactosyltransferase 5 [Fragaria vesca subsp. vesca]	-2.88896	3.47304e-07	1.50323e-06	yes	down		MSTRG.45971	PREDICTED: protein CHUP1, chloroplastic [Fragaria vesca subsp. vesca]	1.67371	4.49654e-05	0.000151681	yes	up
maker-Fvb6-1-snap-gene-280.54	PREDICTED: probable anion transporter 3, chloroplastic [Fragaria vesca subsp. vesca]	-1.1125	0.00382972	0.00941246	yes	down		maker-Fvb3-1-augustus-gene-180.22	PREDICTED: glutamate receptor 2.7-like [Fragaria vesca subsp. vesca]	1.21297	0.00389067	0.00955001	yes	up
maker-Fvb3-2-augustus-gene-131.23	PREDICTED: (-)-germacrene D synthase-like [Fragaria vesca subsp. vesca]	-1.618	3.92976e-05	0.000133571	yes	down		maker-Fvb4-3-snap-gene-29.92	PREDICTED: uncharacterized protein LOC101309444 [Fragaria vesca subsp. vesca]	1.33787	0.000352436	0.00104073	yes	up
maker-Fvb3-1-augustus-gene-130.35	PREDICTED: low molecular weight phosphotyrosine protein phosphatase [Fragaria vesca subsp. vesca]	-1.13787	3.74397e-09	1.95579e-08	yes	down		maker-Fvb2-1-augustus-gene-21.32	PREDICTED: triacylglycerol lipase 1 [Fragaria vesca subsp. vesca]	1.79636	1.77259e-15	1.45919e-14	yes	up
maker-Fvb3-3-augustus-gene-106.27	PREDICTED: NAC domain-containing protein 72-like [Fragaria vesca subsp. vesca]	-3.42908	4.52806e-15	3.63383e-14	yes	down		MSTRG.40184	PREDICTED: ubiquitin-activating enzyme E1 1-like [Fragaria vesca subsp. vesca]	1.58493	6.98726e-13	4.8576e-12	yes	up
maker-Fvb6-1-snap-gene-254.47	PREDICTED: UDP-glycosyltransferase 86A1-like [Fragaria vesca subsp. vesca]	-1.71306	1.34759e-94	9.8762e-93	yes	down		maker-Fvb6-2-snap-gene-137.50	PREDICTED: putative fasciclin-like arabinogalactan protein 20 [Fragaria vesca subsp. vesca]	1.0655	3.79169e-06	1.46083e-05	yes	up
maker-Fvb4-4-augustus-gene-74.44	PREDICTED: photosynthetic NDH subunit of lumenal location 5, chloroplastic [Fragaria vesca subsp. vesca]	-1.30353	8.85071e-91	6.10235e-89	yes	down		augustus_masked-Fvb2-3-processed-gene-2.2	PREDICTED: uncharacterized protein LOC101312951 [Fragaria vesca subsp. vesca]	4.29757	5.35967e-45	1.39019e-43	yes	up
augustus_masked-Fvb3-1-processed-gene-296.5	polyphenol oxidase latent form, chloroplastic-like [Rosa chinensis]	-1.35109	3.61181e-73	1.7614e-71	yes	down		maker-Fvb4-2-snap-gene-62.67	PREDICTED: uncharacterized protein LOC101309418 [Fragaria vesca subsp. vesca]	4.15092	0.00429637	0.0104513	yes	up
snap_masked-Fvb6-3-processed-gene-22.39	PREDICTED: WAT1-related protein At5g40240-like isoform X2 [Fragaria vesca subsp. vesca]	-1.08221	4.94413e-59	1.84479e-57	yes	down		maker-Fvb7-3-augustus-gene-182.41	PREDICTED: AP2-like ethylene-responsive transcription factor TOE3 [Fragaria vesca subsp. vesca]	1.23583	0.00138289	0.00369166	yes	up
snap_masked-Fvb6-2-processed-gene-317.39	PREDICTED: late embryogenesis abundant protein 2-like isoform X2 [Fragaria vesca subsp. vesca]	-3.01872	3.29879e-69	1.51705e-67	yes	down		maker-Fvb6-4-augustus-gene-81.35	PREDICTED: chlorophyll a-b binding protein CP29.2, chloroplastic [Fragaria vesca subsp. vesca]	1.13978	9.67819e-41	2.22152e-39	yes	up
maker-Fvb6-3-augustus-gene-392.56	PREDICTED: uncharacterized protein LOC101306256 [Fragaria vesca subsp. vesca]	-1.3155	0.000171259	0.000530254	yes	down		maker-Fvb2-1-snap-gene-142.34	PREDICTED: hyoscyamine 6-dioxygenase-like isoform X3 [Fragaria vesca subsp. vesca]	2.18584	7.78339e-37	1.58242e-35	yes	up
maker-Fvb5-3-augustus-gene-251.54	PREDICTED: anthocyanidin reductase-like isoform X1 [Fragaria vesca subsp. vesca]	-1.19752	5.84774e-26	8.00851e-25	yes	down		maker-Fvb5-4-augustus-gene-24.56	PREDICTED: probable GABA transporter 2 [Fragaria vesca subsp. vesca]	1.03681	6.6468e-19	6.59631e-18	yes	up
maker-Fvb6-2-augustus-gene-11.25	PREDICTED: beta-amyrin synthase-like [Fragaria vesca subsp. vesca]	-4.19783	0	0	yes	down		maker-Fvb2-3-augustus-gene-23.59	PREDICTED: probable WRKY transcription factor 40 isoform X1 [Fragaria vesca subsp. vesca]	2.29208	8.07247e-18	7.567e-17	yes	up
maker-Fvb4-3-augustus-gene-145.27	PREDICTED: sodium/hydrogen exchanger 2-like [Fragaria vesca subsp. vesca]	-1.32697	1.79619e-19	1.83379e-18	yes	down		maker-Fvb1-4-snap-gene-81.47	PREDICTED: uncharacterized protein LOC101292342 [Fragaria vesca subsp. vesca]	2.77604	0.000136001	0.000427754	yes	up
maker-Fvb2-4-snap-gene-265.134	PREDICTED: probable phospholipid hydroperoxide glutathione peroxidase [Fragaria vesca subsp. vesca]	-1.10164	4.99365e-69	2.29075e-67	yes	down		MSTRG.1235	PREDICTED: UPF0548 protein At2g17695 [Fragaria vesca subsp. vesca]	1.17444	1.88456e-20	2.01927e-19	yes	up
maker-Fvb3-4-snap-gene-142.38	PREDICTED: protein FAF-like, chloroplastic [Fragaria vesca subsp. vesca]	-1.77598	2.48428e-97	1.8978e-95	yes	down		MSTRG.16940	PREDICTED: BTB/POZ domain-containing protein At2g30600 [Fragaria vesca subsp. vesca]	2.03869	3.60044e-274	2.1644e-271	yes	up
augustus_masked-Fvb7-2-processed-gene-187.5	PREDICTED: desiccation protectant protein Lea14 homolog [Fragaria vesca subsp. vesca]	-1.62329	4.70768e-40	1.05815e-38	yes	down		maker-Fvb5-4-snap-gene-106.44	PREDICTED: uncharacterized protein LOC101313902 [Fragaria vesca subsp. vesca]	1.11172	2.89294e-13	2.07067e-12	yes	up
maker-Fvb1-1-augustus-gene-133.46	PREDICTED: uncharacterized protein LOC105352830 isoform X1 [Fragaria vesca subsp. vesca]	-1.0283	0.000759963	0.00212618	yes	down		maker-Fvb5-1-snap-gene-78.60	PREDICTED: coatomer subunit alpha-1-like [Fragaria vesca subsp. vesca]	1.85758	8.90932e-09	4.497e-08	yes	up
maker-Fvb7-3-augustus-gene-161.28	PREDICTED: uncharacterized protein LOC101297100 [Fragaria vesca subsp. vesca]	-1.32403	4.96075e-10	2.78468e-09	yes	down		MSTRG.28683	PREDICTED: uncharacterized protein LOC105351163 [Fragaria vesca subsp. vesca]	1.6709	4.75253e-07	2.02482e-06	yes	up
augustus_masked-Fvb7-4-processed-gene-40.8	PREDICTED: adenine/guanine permease AZG1 [Fragaria vesca subsp. vesca]	-1.61813	7.3389e-15	5.81648e-14	yes	down		maker-Fvb1-3-snap-gene-97.57	PREDICTED: cyclic nucleotide-gated ion channel 1-like [Fragaria vesca subsp. vesca]	1.33789	0.00438811	0.0106556	yes	up
maker-Fvb3-2-augustus-gene-260.21	PREDICTED: methylsterol monooxygenase 2-2 isoform X1 [Fragaria vesca subsp. vesca]	-2.33454	1.18565e-53	3.86022e-52	yes	down		maker-Fvb4-3-augustus-gene-78.57	PREDICTED: uncharacterized protein LOC101300241 [Fragaria vesca subsp. vesca]	1.05342	0.000770145	0.00215107	yes	up
maker-Fvb6-1-augustus-gene-338.52	hypothetical protein PRdownE_6G336000 [Prunus persica]	-1.08688	8.70724e-20	9.00953e-19	yes	down		maker-Fvb2-4-snap-gene-53.43	uncharacterized protein LOC112172658 isoform X1 [Rosa chinensis]	3.06132	8.2925e-63	3.35848e-61	yes	up
maker-Fvb6-1-augustus-gene-9.34	PREDICTED: squamosa promoter-binding-like protein 13A [Fragaria vesca subsp. vesca]	-2.08674	8.15049e-66	3.48027e-64	yes	down		maker-Fvb5-2-snap-gene-155.27	PREDICTED: receptor-like protein 12 isoform X3 [Fragaria vesca subsp. vesca]	1.16026	7.94345e-55	2.66159e-53	yes	up
MSTRG.56253	--	-1.40098	7.06886e-25	9.2445e-24	yes	down		MSTRG.17988	PREDICTED: protein argonaute 4-like [Fragaria vesca subsp. vesca]	1.10272	8.6631e-65	3.6284e-63	yes	up
maker-Fvb1-2-augustus-gene-112.35	PREDICTED: BTB/POZ and TAZ domain-containing protein 4 [Fragaria vesca subsp. vesca]	-1.69077	8.8771e-06	3.27535e-05	yes	down		MSTRG.15679	PREDICTED: monocopper oxidase-like protein SKU5 [Fragaria vesca subsp. vesca]	1.85312	1.08378e-46	2.94655e-45	yes	up
maker-Fvb1-3-snap-gene-207.26	PREDICTED: ALA-interacting subunit 3-like [Fragaria vesca subsp. vesca]	-1.91541	3.97064e-20	4.18092e-19	yes	down		augustus_masked-Fvb5-1-processed-gene-262.3	PREDICTED: UDP-glycosyltransferase 91C1 [Fragaria vesca subsp. vesca]	4.31725	6.74604e-90	4.61319e-88	yes	up
maker-Fvb5-3-augustus-gene-52.49	PREDICTED: MATE efflux family protein 5 [Fragaria vesca subsp. vesca]	-1.53168	6.03937e-22	6.95912e-21	yes	down		snap_masked-Fvb7-4-processed-gene-49.32	PREDICTED: nematode resistance protein-like HSPRO2 [Fragaria vesca subsp. vesca]	2.56613	6.29419e-36	1.2362e-34	yes	up
maker-Fvb2-4-augustus-gene-217.61	PREDICTED: chlorophyllase-1 [Fragaria vesca subsp. vesca]	-1.1675	1.22994e-30	2.04456e-29	yes	down		augustus_masked-Fvb4-2-processed-gene-47.9	PREDICTED: uncharacterized protein LOC105351825 [Fragaria vesca subsp. vesca]	2.14158	6.3397e-05	0.00020968	yes	up
maker-Fvb4-3-augustus-gene-167.36	PREDICTED: protein TIME FOR COFFEE isoform X1 [Fragaria vesca subsp. vesca]	-1.56767	2.35297e-100	1.89839e-98	yes	down		maker-Fvb2-3-augustus-gene-184.37	PREDICTED: CDPK-related kinase 5-like [Fragaria vesca subsp. vesca]	1.2884	8.57477e-26	1.16599e-24	yes	up
augustus_masked-Fvb2-3-processed-gene-207.6	PREDICTED: fasciclin-like arabinogalactan protein 19 [Fragaria vesca subsp. vesca]	-1.82152	0.0131607	0.0288641	yes	down		maker-Fvb1-1-augustus-gene-175.50	PREDICTED: uncharacterized protein LOC101301480 isoform X2 [Fragaria vesca subsp. vesca]	1.70737	0.000696425	0.00195831	yes	up
maker-Fvb4-2-augustus-gene-20.43	PREDICTED: histidine kinase 4 [Fragaria vesca subsp. vesca]	-1.3896	2.41211e-15	1.96733e-14	yes	down		maker-Fvb5-1-augustus-gene-3.66	PREDICTED: 7-ethoxycoumarin O-deethylase-like [Fragaria vesca subsp. vesca]	5.75254	4.78263e-17	4.31178e-16	yes	up
snap_masked-Fvb6-2-processed-gene-248.18	hypothetical protein RchiOBHm_Chr3g0456821 [Rosa chinensis]	-1.0179	8.74588e-05	0.000283413	yes	down		augustus_masked-Fvb5-4-processed-gene-2.0	PREDICTED: acid beta-fructofuranosidase-like [Fragaria vesca subsp. vesca]	3.0057	2.11539e-14	1.62803e-13	yes	up
maker-Fvb5-2-augustus-gene-224.33	protein DETOXIFICATION 27-like [Rosa chinensis]	-2.28317	0.0151951	0.0328527	yes	down		maker-Fvb2-1-snap-gene-222.59	putative transcription factor WD40-like family [Rosa chinensis]	1.48119	5.29903e-27	7.5952e-26	yes	up
maker-Fvb6-1-snap-gene-240.40	PREDICTED: pentatricopeptide repeat-containing protein At5g27110-like [Fragaria vesca subsp. vesca]	-1.17577	1.53458e-23	1.88999e-22	yes	down		MSTRG.24926	PREDICTED: uncharacterized protein LOC101304409 [Fragaria vesca subsp. vesca]	1.62588	1.32675e-23	1.63863e-22	yes	up
maker-Fvb4-2-augustus-gene-23.33	PREDICTED: probable sulfate transporter 3.3 [Fragaria vesca subsp. vesca]	-2.04307	9.91562e-106	8.88022e-104	yes	down		augustus_masked-Fvb2-1-processed-gene-192.13	PREDICTED: RNA-dependent RNA polymerase 6-like [Fragaria vesca subsp. vesca]	2.15433	0.00222312	0.00571937	yes	up
augustus_masked-Fvb2-1-processed-gene-247.0	24-methylenesterol C-methyltransferase 2 [Rosa chinensis]	-1.49794	2.30884e-47	6.38287e-46	yes	down		maker-Fvb5-4-augustus-gene-180.35	PREDICTED: LOW QUALITY PROTEIN: pentatricopeptide repeat-containing protein At3g04130, mitochondrial-like [Fragaria vesca subsp. vesca]	1.22477	3.1831e-19	3.20984e-18	yes	up
maker-Fvb1-4-augustus-gene-86.47	PREDICTED: probable LRR receptor-like serine/threonine-protein kinase At4g37250 [Fragaria vesca subsp. vesca]	-1.7591	5.13357e-26	7.05251e-25	yes	down		MSTRG.29145	--	1.01513	2.06019e-12	1.3887e-11	yes	up
maker-Fvb6-2-augustus-gene-352.43	PREDICTED: myosin-10 [Fragaria vesca subsp. vesca]	-1.26876	5.80912e-35	1.10438e-33	yes	down		maker-Fvb6-3-snap-gene-232.59	PREDICTED: uncharacterized protein At5g39865-like [Fragaria vesca subsp. vesca]	1.87792	0.00444302	0.0107798	yes	up
augustus_masked-Fvb6-2-processed-gene-160.5	PREDICTED: probable C-terminal domain small phosphatase [Fragaria vesca subsp. vesca]	-1.3065	2.42408e-08	1.17309e-07	yes	down		augustus_masked-Fvb3-2-processed-gene-47.10	PREDICTED: ethylene-responsive transcription factor 12 [Fragaria vesca subsp. vesca]	1.43479	0.000727741	0.00204113	yes	up
maker-Fvb4-1-augustus-gene-167.52	PREDICTED: ninja-family protein AFP2-like [Fragaria vesca subsp. vesca]	-2.08432	1.41871e-62	5.71809e-61	yes	down		maker-Fvb4-3-augustus-gene-12.45	PREDICTED: zinc finger MYND domain-containing protein 15 isoform X1 [Fragaria vesca subsp. vesca]	1.21294	0.000411139	0.00120074	yes	up
maker-Fvb4-3-augustus-gene-103.36	PREDICTED: REF/SRPP-like protein At1g67360 [Fragaria vesca subsp. vesca]	-1.06086	9.11753e-21	9.92301e-20	yes	down		MSTRG.11975	putative uridine kinase C227.14 isoform X3 [Rosa chinensis]	1.63112	1.04526e-38	2.24623e-37	yes	up
augustus_masked-Fvb3-4-processed-gene-59.3	PREDICTED: transcription factor PCL1 [Fragaria vesca subsp. vesca]	-5.2811	2.38799e-41	5.57457e-40	yes	down		maker-Fvb3-4-augustus-gene-142.31	PREDICTED: serine/threonine-protein kinase Nek5 [Fragaria vesca subsp. vesca]	1.23218	6.49171e-13	4.52232e-12	yes	up
augustus_masked-Fvb5-1-processed-gene-275.10	PREDICTED: isoamylase 3, chloroplastic [Fragaria vesca subsp. vesca]	-2.01821	9.78785e-214	3.07252e-211	yes	down		MSTRG.23384	PREDICTED: syntaxin-52-like [Fragaria vesca subsp. vesca]	1.05016	6.2686e-06	2.35343e-05	yes	up
augustus_masked-Fvb4-1-processed-gene-187.14	PREDICTED: pectinesterase [Fragaria vesca subsp. vesca]	-1.62963	2.23623e-47	6.18585e-46	yes	down		augustus_masked-Fvb7-3-processed-gene-140.5	PREDICTED: 14 kDa proline-rich protein DC2.15 [Fragaria vesca subsp. vesca]	2.87235	0.00201028	0.00520927	yes	up
maker-Fvb5-3-snap-gene-171.57	PREDICTED: peroxisome biogenesis protein 19-2-like [Fragaria vesca subsp. vesca]	-1.02201	3.56532e-12	2.35645e-11	yes	down		maker-Fvb2-1-augustus-gene-219.49	PREDICTED: uncharacterized protein LOC101307170 [Fragaria vesca subsp. vesca]	1.78443	2.68178e-29	4.23377e-28	yes	up
maker-Fvb6-4-augustus-gene-81.31	PREDICTED: vacuolar cation/proton exchanger 3 [Fragaria vesca subsp. vesca]	-1.46066	7.96068e-85	4.98428e-83	yes	down		MSTRG.48492	PREDICTED: peptidyl-prolyl cis-trans isomerase CYP95-like [Pyrus x bretschneideri]	1.88715	0.000230834	0.000701743	yes	up
snap_masked-Fvb1-4-processed-gene-29.31	PREDICTED: probable caffeoyl-CoA O-methyltransferase At4g26220 [Fragaria vesca subsp. vesca]	-2.8414	1.89435e-146	2.87042e-144	yes	down		snap_masked-Fvb7-1-processed-gene-215.28	PREDICTED: GATA transcription factor 8 [Fragaria vesca subsp. vesca]	1.15673	2.00066e-42	4.8272e-41	yes	up
snap_masked-Fvb7-1-processed-gene-279.21	PREDICTED: peptidyl-prolyl cis-trans isomerase FKBP53 [Fragaria vesca subsp. vesca]	-1.05101	2.45037e-12	1.64148e-11	yes	down		maker-Fvb6-1-augustus-gene-29.51	PREDICTED: protein CREG1 [Fragaria vesca subsp. vesca]	2.27294	6.79661e-58	2.46501e-56	yes	up
maker-Fvb3-3-snap-gene-114.62	PREDICTED: scarecrow-like protein 21 [Fragaria vesca subsp. vesca]	-1.37723	1.53815e-42	3.72394e-41	yes	down		maker-Fvb3-4-augustus-gene-111.32	PREDICTED: MLP-like protein 43 [Fragaria vesca subsp. vesca]	1.03783	1.96129e-29	3.11988e-28	yes	up
MSTRG.34650	hypothetical protein RchiOBHm_Chr7g0204351 [Rosa chinensis]	-2.53133	4.28929e-29	6.70027e-28	yes	down		MSTRG.33499	PREDICTED: probable inactive purple acid phosphatase 1 isoform X1 [Fragaria vesca subsp. vesca]	1.3516	6.52922e-38	1.36702e-36	yes	up
maker-Fvb6-4-augustus-gene-96.35	PREDICTED: uncharacterized protein LOC101303240 [Fragaria vesca subsp. vesca]	-1.84006	2.19293e-16	1.9019e-15	yes	down		augustus_masked-Fvb3-4-processed-gene-49.8	PREDICTED: probable pyridoxal 5&apos;-phosphate synthase subunit PDX1 [Fragaria vesca subsp. vesca]	1.33877	0.0169084	0.0361684	yes	up
maker-Fvb6-3-augustus-gene-410.65	PREDICTED: WD repeat-containing protein 48 [Fragaria vesca subsp. vesca]	-1.22497	3.4054e-61	1.3317e-59	yes	down		snap_masked-Fvb3-2-processed-gene-217.21	receptor-like serine/threonine-protein kinase At2g45590 [Rosa chinensis]	1.77329	0.0114176	0.0254132	yes	up
MSTRG.64455	probable RNA helicase SDE3 isoform X2 [Rosa chinensis]	-1.38699	0.00280426	0.00708428	yes	down		augustus_masked-Fvb6-2-processed-gene-176.10	PREDICTED: uncharacterized protein LOC101312271 [Fragaria vesca subsp. vesca]	2.65564	9.16256e-05	0.000296081	yes	up
MSTRG.32913	putative ribonuclease H [Rosa chinensis]	-3.61167	0.00464519	0.0112265	yes	down		snap_masked-Fvb6-3-processed-gene-38.34	PREDICTED: phenolic glucoside malonyltransferase 1-like [Fragaria vesca subsp. vesca]	1.05635	1.30839e-10	7.69836e-10	yes	up
maker-Fvb2-3-augustus-gene-5.51	PREDICTED: selenoprotein H [Fragaria vesca subsp. vesca]	-1.4305	2.75456e-28	4.16426e-27	yes	down		augustus_masked-Fvb2-3-processed-gene-35.4	PREDICTED: DNA topoisomerase 1-like [Fragaria vesca subsp. vesca]	2.80028	4.06621e-56	1.4113e-54	yes	up
maker-Fvb5-1-augustus-gene-279.31	PREDICTED: 7-deoxyloganetin glucosyltransferase-like [Fragaria vesca subsp. vesca]	-1.74953	2.77601e-40	6.27183e-39	yes	down		augustus_masked-Fvb5-1-processed-gene-297.9	uncharacterized protein LOC112185884 [Rosa chinensis]	1.65754	2.34996e-61	9.21312e-60	yes	up
maker-Fvb7-4-augustus-gene-106.50	PREDICTED: LOW QUALITY PROTEIN: uncharacterized protein LOC101302880 [Fragaria vesca subsp. vesca]	-2.06473	1.12254e-26	1.58063e-25	yes	down		maker-Fvb7-1-augustus-gene-264.55	PREDICTED: protein EARLY RESPONSIVE TO DEHYDRATION 15-like isoform X2 [Fragaria vesca subsp. vesca]	1.1467	0.000367553	0.001082	yes	up
maker-Fvb2-1-augustus-gene-46.22	PREDICTED: glycine-rich RNA-binding, abscisic acid-inducible protein-like isoform X1 [Fragaria vesca subsp. vesca]	-2.2867	3.78066e-32	6.61211e-31	yes	down		MSTRG.3896	PREDICTED: cysteine-rich repeat secretory protein 60 [Fragaria vesca subsp. vesca]	1.90216	1.06197e-06	4.34907e-06	yes	up
maker-Fvb6-1-snap-gene-354.73	PREDICTED: peptide chain release factor PrfB1, chloroplastic [Fragaria vesca subsp. vesca]	-1.08176	4.68313e-12	3.06486e-11	yes	down		augustus_masked-Fvb7-4-processed-gene-212.0	hypothetical protein RchiOBHm_Chr1g0317121 [Rosa chinensis]	2.62085	1.63718e-06	6.56558e-06	yes	up
maker-Fvb6-3-augustus-gene-164.34	PREDICTED: AP2-like ethylene-responsive transcription factor At1g16060 [Fragaria vesca subsp. vesca]	-1.96122	0.00125462	0.00337433	yes	down		maker-Fvb4-4-snap-gene-187.22	uncharacterized protein LOC112192958 isoform X1 [Rosa chinensis]	1.24251	2.2431e-45	5.87448e-44	yes	up
maker-Fvb2-4-augustus-gene-207.30	PREDICTED: lactation elevated protein 1 [Fragaria vesca subsp. vesca]	-2.79328	3.96142e-66	1.71139e-64	yes	down		maker-Fvb5-1-snap-gene-283.56	PREDICTED: putative disease resistance protein RGA3 [Fragaria vesca subsp. vesca]	1.36597	6.44959e-18	6.07919e-17	yes	up
augustus_masked-Fvb7-1-processed-gene-124.2	PREDICTED: uncharacterized protein LOC101297100 [Fragaria vesca subsp. vesca]	-1.25431	1.92365e-10	1.1162e-09	yes	down		snap_masked-Fvb2-3-processed-gene-129.30	PREDICTED: TMV resistance protein N-like isoform X1 [Fragaria vesca subsp. vesca]	1.07392	2.20206e-20	2.35098e-19	yes	up
augustus_masked-Fvb6-1-processed-gene-245.0	PREDICTED: uncharacterized protein LOC101312168 [Fragaria vesca subsp. vesca]	-1.99335	0.016835	0.0360256	yes	down		snap_masked-Fvb7-4-processed-gene-28.14	PREDICTED: 3-ketoacyl-CoA synthase 6-like [Fragaria vesca subsp. vesca]	1.53313	0.023853	0.0490609	yes	up
maker-Fvb1-2-augustus-gene-54.50	PREDICTED: succinate dehydrogenase [ubiquinone] flavoprotein subunit 1, mitochondrial [Fragaria vesca subsp. vesca]	-1.22424	1.33447e-74	6.71441e-73	yes	down		augustus_masked-Fvb1-3-processed-gene-157.3	PREDICTED: G-type lectin S-receptor-like serine/threonine-protein kinase RLK1 [Fragaria vesca subsp. vesca]	1.32624	8.13455e-21	8.88578e-20	yes	up
maker-Fvb5-1-snap-gene-46.80	PREDICTED: uncharacterized protein LOC101299666 [Fragaria vesca subsp. vesca]	-1.2436	2.49373e-35	4.81248e-34	yes	down		maker-Fvb6-1-snap-gene-41.90	tyrosine--tRNA ligase 1, cytoplasmic-like [Rosa chinensis]	1.53677	6.72459e-22	7.72643e-21	yes	up
snap_masked-Fvb4-4-processed-gene-224.21	PREDICTED: pentatricopeptide repeat-containing protein At2g18940, chloroplastic [Fragaria vesca subsp. vesca]	-1.16673	7.84394e-36	1.5337e-34	yes	down		augustus_masked-Fvb1-4-processed-gene-85.3	PREDICTED: UPF0481 protein At3g47200 [Fragaria vesca subsp. vesca]	1.47911	0.000126762	0.000400352	yes	up
snap_masked-Fvb1-3-processed-gene-185.15	PREDICTED: uncharacterized protein LOC101309584 [Fragaria vesca subsp. vesca]	-1.5234	3.50863e-56	1.21961e-54	yes	down		maker-Fvb1-1-augustus-gene-266.50	PREDICTED: uncharacterized protein LOC101307251 [Fragaria vesca subsp. vesca]	1.70059	1.01543e-06	4.16905e-06	yes	up
snap_masked-Fvb6-1-processed-gene-120.19	PREDICTED: protein ELF4-LIKE 4-like [Fragaria vesca subsp. vesca]	-1.01847	1.15816e-11	7.36978e-11	yes	down		maker-Fvb2-3-augustus-gene-113.40	PREDICTED: probable LRR receptor-like serine/threonine-protein kinase At4g08850 [Fragaria vesca subsp. vesca]	1.0356	3.70076e-26	5.12314e-25	yes	up
MSTRG.200	PREDICTED: DEAD-box ATP-dependent RNA helicase 42 [Pyrus x bretschneideri]	-1.74301	7.46722e-18	7.01394e-17	yes	down		maker-Fvb4-1-snap-gene-118.34	PREDICTED: mediator of RNA polymerase II transcription subunit 33A-like isoform X2 [Fragaria vesca subsp. vesca]	1.01616	4.23359e-08	2.00406e-07	yes	up
maker-Fvb6-1-augustus-gene-293.66	PREDICTED: endochitinase A-like [Fragaria vesca subsp. vesca]	-2.57656	2.02359e-102	1.70129e-100	yes	down		snap_masked-Fvb4-4-processed-gene-123.11	hypothetical protein RchiOBHm_Chr4g0423141 [Rosa chinensis]	1.42354	4.07618e-05	0.000138277	yes	up
maker-Fvb7-1-snap-gene-134.31	translation initiation factor 1 (plastid) [Comarum salesovianum]	-1.07099	2.57979e-19	2.61464e-18	yes	down		MSTRG.61407	PREDICTED: glutamine synthetase leaf isozyme, chloroplastic [Fragaria vesca subsp. vesca]	1.70609	4.0461e-16	3.45217e-15	yes	up
MSTRG.7569	PREDICTED: NAC domain-containing protein 2-like [Fragaria vesca subsp. vesca]	-1.08348	3.01479e-48	8.53196e-47	yes	down		maker-Fvb5-2-augustus-gene-238.29	PREDICTED: 1-aminocyclopropane-1-carboxylate oxidase homolog [Fragaria vesca subsp. vesca]	1.05046	0.00282852	0.0071389	yes	up
augustus_masked-Fvb1-4-processed-gene-134.8	hypothetical protein RchiOBHm_Chr2g0117891 [Rosa chinensis]	-1.34328	7.94394e-05	0.000259032	yes	down		MSTRG.21019	--	1.57001	9.49897e-27	1.34371e-25	yes	up
augustus_masked-Fvb3-4-processed-gene-150.13	PREDICTED: uncharacterized protein LOC105349931 [Fragaria vesca subsp. vesca]	-6.46977	6.6666e-151	1.07197e-148	yes	down		snap_masked-Fvb6-3-processed-gene-253.26	PREDICTED: syntaxin-121-like [Fragaria vesca subsp. vesca]	1.38198	0.0038048	0.00935896	yes	up
maker-Fvb5-2-augustus-gene-58.65	PREDICTED: oligopeptide transporter 7 [Fragaria vesca subsp. vesca]	-2.44787	2.84339e-34	5.29017e-33	yes	down		maker-Fvb5-3-augustus-gene-104.32	PREDICTED: uncharacterized protein LOC101297544 isoform X2 [Fragaria vesca subsp. vesca]	1.59657	3.71132e-38	7.81664e-37	yes	up
snap_masked-Fvb2-3-processed-gene-41.33	PREDICTED: GDSL esterase/lipase EXL3-like [Fragaria vesca subsp. vesca]	-2.25737	5.21943e-06	1.97825e-05	yes	down		maker-Fvb1-3-snap-gene-67.57	PREDICTED: LRR receptor-like serine/threonine-protein kinase GSO1 [Fragaria vesca subsp. vesca]	1.68688	2.95098e-08	1.41697e-07	yes	up
maker-Fvb3-4-augustus-gene-229.36	PREDICTED: transcription initiation factor TFIID subunit 11 [Fragaria vesca subsp. vesca]	-1.0151	1.21854e-06	4.96325e-06	yes	down		maker-Fvb4-2-augustus-gene-27.50	PREDICTED: transcription factor PRE6 [Fragaria vesca subsp. vesca]	1.05662	2.36147e-15	1.92757e-14	yes	up
MSTRG.33722	PREDICTED: high affinity nitrate transporter 2.5-like [Fragaria vesca subsp. vesca]	-1.8665	7.72921e-22	8.84756e-21	yes	down		maker-Fvb7-1-augustus-gene-251.28	PREDICTED: uncharacterized protein LOC101311801 [Fragaria vesca subsp. vesca]	1.04141	3.04516e-06	1.18831e-05	yes	up
maker-Fvb3-4-snap-gene-77.43	hypothetical protein RchiOBHm_Chr6g0295101 [Rosa chinensis]	-1.43814	5.75968e-26	7.89379e-25	yes	down		maker-Fvb1-3-augustus-gene-90.35	PREDICTED: uncharacterized protein LOC101293717 [Fragaria vesca subsp. vesca]	1.02515	3.77813e-20	3.98096e-19	yes	up
maker-Fvb2-2-augustus-gene-235.27	PREDICTED: uncharacterized protein LOC101314035 [Fragaria vesca subsp. vesca]	-2.01955	1.95329e-08	9.52879e-08	yes	down		maker-Fvb1-4-augustus-gene-3.61	PREDICTED: uncharacterized protein LOC101298054 [Fragaria vesca subsp. vesca]	1.47635	0.00577931	0.0137155	yes	up
maker-Fvb4-3-augustus-gene-92.26	PREDICTED: uncharacterized protein LOC101312728 [Fragaria vesca subsp. vesca]	-1.20959	1.26343e-28	1.93642e-27	yes	down		augustus_masked-Fvb3-2-processed-gene-41.20	PREDICTED: peroxisome biogenesis protein 7 [Fragaria vesca subsp. vesca]	1.27507	0.00696801	0.0162633	yes	up
maker-Fvb1-4-augustus-gene-61.56	PREDICTED: dehydrin Xero 2 [Fragaria vesca subsp. vesca]	-3.53588	9.40582e-259	4.97189e-256	yes	down		maker-Fvb1-2-augustus-gene-61.43	PREDICTED: subtilisin-like protease [Fragaria vesca subsp. vesca]	1.30566	4.34629e-11	2.65265e-10	yes	up
maker-Fvb6-4-snap-gene-269.55	PREDICTED: uncharacterized protein LOC101299396 [Fragaria vesca subsp. vesca]	-1.16981	9.19917e-05	0.000297128	yes	down		maker-Fvb6-1-augustus-gene-233.38	PREDICTED: uncharacterized protein LOC101300265 [Fragaria vesca subsp. vesca]	1.73879	3.73697e-08	1.77665e-07	yes	up
maker-Fvb1-4-snap-gene-113.39	PREDICTED: lanC-like protein GCL1 [Fragaria vesca subsp. vesca]	-1.52393	1.72317e-48	4.90986e-47	yes	down		maker-Fvb2-3-snap-gene-153.51	PREDICTED: uncharacterized protein LOC105350043 [Fragaria vesca subsp. vesca]	1.0523	8.67712e-10	4.77953e-09	yes	up
maker-Fvb5-2-augustus-gene-244.33	PREDICTED: nitrate reductase [NADH]-like [Fragaria vesca subsp. vesca]	-3.4855	1.30945e-253	6.40625e-251	yes	down		augustus_masked-Fvb2-3-processed-gene-16.10	PREDICTED: glycine-rich protein 2-like [Fragaria vesca subsp. vesca]	2.21001	8.48263e-07	3.51504e-06	yes	up
maker-Fvb6-1-augustus-gene-253.50	PREDICTED: TSL-kinase interacting protein 1 isoform X2 [Fragaria vesca subsp. vesca]	-1.46861	3.12721e-77	1.65399e-75	yes	down		MSTRG.37322	PREDICTED: nucleosome assembly protein 1;1-like, partial [Fragaria vesca subsp. vesca]	4.92192	1.34907e-18	1.31736e-17	yes	up
maker-Fvb7-3-augustus-gene-133.36	putative microtubule-associated protein, MAP65/Ase1/PRC1 [Rosa chinensis]	-1.31555	4.17938e-07	1.79242e-06	yes	down		MSTRG.1732	PREDICTED: putative protein TPRXL isoform X1 [Prunus mume]	1.27328	6.83581e-20	7.10831e-19	yes	up
maker-Fvb7-4-augustus-gene-83.28	PREDICTED: thioredoxin-like 3-2, chloroplastic [Fragaria vesca subsp. vesca]	-1.35962	5.02232e-05	0.000168257	yes	down		augustus_masked-Fvb7-2-processed-gene-316.13	PREDICTED: uncharacterized protein LOC101303468 [Fragaria vesca subsp. vesca]	2.36406	3.4965e-72	1.68286e-70	yes	up
maker-Fvb6-1-snap-gene-21.48	PREDICTED: J protein JJJ1-like [Fragaria vesca subsp. vesca]	-1.39073	6.51854e-100	5.20442e-98	yes	down		maker-Fvb7-3-snap-gene-10.69	PREDICTED: uncharacterized protein LOC101292941 [Fragaria vesca subsp. vesca]	4.06973	5.79387e-11	3.50129e-10	yes	up
maker-Fvb7-2-augustus-gene-193.40	PREDICTED: DEAD-box ATP-dependent RNA helicase 31-like [Fragaria vesca subsp. vesca]	-1.37969	8.30635e-78	4.44177e-76	yes	down		augustus_masked-Fvb3-3-processed-gene-22.10	precursor of CEP14 [Rosa chinensis]	1.91403	0.00623803	0.0146927	yes	up
maker-Fvb7-4-snap-gene-188.20	PREDICTED: uncharacterized protein LOC101310161 [Fragaria vesca subsp. vesca]	-1.54927	4.65664e-144	6.77688e-142	yes	down		MSTRG.56140	PREDICTED: uncharacterized protein LOC101291744 [Fragaria vesca subsp. vesca]	2.66168	0.0203532	0.042673	yes	up
maker-Fvb4-1-snap-gene-12.37	hypothetical protein RchiOBHm_Chr2g0095251 [Rosa chinensis]	-1.20026	6.84162e-07	2.86563e-06	yes	down		maker-Fvb6-1-snap-gene-328.72	PREDICTED: uncharacterized protein LOC101305085 [Fragaria vesca subsp. vesca]	1.24883	3.00413e-09	1.58206e-08	yes	up
maker-Fvb5-4-augustus-gene-155.35	PREDICTED: probable cellulose synthase A catalytic subunit 3 [UDP-forming] [Fragaria vesca subsp. vesca]	-1.47612	8.67407e-107	7.89126e-105	yes	down		snap_masked-Fvb4-4-processed-gene-46.25	PREDICTED: uncharacterized protein LOC105350568 [Fragaria vesca subsp. vesca]	3.20881	5.27395e-13	3.69667e-12	yes	up
maker-Fvb7-1-augustus-gene-306.62	PREDICTED: beta-carotene hydroxylase 2, chloroplastic-like [Fragaria vesca subsp. vesca]	-1.57039	5.04087e-49	1.45296e-47	yes	down		augustus_masked-Fvb6-4-processed-gene-207.1	PREDICTED: F-box/LRR-repeat MAX2 homolog A [Fragaria vesca subsp. vesca]	1.54089	3.74144e-12	2.46984e-11	yes	up
maker-Fvb1-4-augustus-gene-22.37	PREDICTED: sugar transport protein 7 [Fragaria vesca subsp. vesca]	-1.72697	2.35653e-69	1.08753e-67	yes	down		maker-Fvb5-2-snap-gene-106.68	PREDICTED: probable metal-nicotianamine transporter YSL7 [Fragaria vesca subsp. vesca]	1.29161	1.89975e-60	7.30179e-59	yes	up
maker-Fvb5-4-augustus-gene-57.50	PREDICTED: short-chain dehydrogenase TIC 32, chloroplastic isoform X1 [Fragaria vesca subsp. vesca]	-2.89303	3.19873e-07	1.38921e-06	yes	down		maker-Fvb6-3-augustus-gene-253.34	PREDICTED: syntaxin-121-like [Fragaria vesca subsp. vesca]	1.38198	0.0038048	0.00935896	yes	up
augustus_masked-Fvb1-2-processed-gene-54.19	PREDICTED: dirigent protein 23-like [Fragaria vesca subsp. vesca]	-1.44724	0.00146111	0.00388425	yes	down		maker-Fvb6-1-augustus-gene-296.49	PREDICTED: phosphoinositide phosphatase SAC8 [Fragaria vesca subsp. vesca]	1.84964	5.41449e-32	9.43188e-31	yes	up
MSTRG.58818	PREDICTED: common plant regulatory factor 1-like [Fragaria vesca subsp. vesca]	-3.4762	6.86843e-104	5.95972e-102	yes	down		augustus_masked-Fvb2-2-processed-gene-208.12	PREDICTED: uncharacterized protein LOC105352886 [Fragaria vesca subsp. vesca]	2.87397	3.88323e-06	1.4946e-05	yes	up
maker-Fvb1-1-augustus-gene-171.37	PREDICTED: LRR receptor-like serine/threonine-protein kinase HSL2 [Fragaria vesca subsp. vesca]	-1.32331	3.42047e-07	1.48131e-06	yes	down		maker-Fvb6-4-augustus-gene-36.48	auxin-responsive protein IAA4-like [Rosa chinensis]	2.75413	1.05249e-176	2.2885e-174	yes	up
maker-Fvb2-1-augustus-gene-210.36	PREDICTED: ATP-dependent zinc metalloprotease FTSH 4, mitochondrial [Fragaria vesca subsp. vesca]	-1.26396	8.32e-59	3.0782e-57	yes	down		maker-Fvb7-2-augustus-gene-47.30	PREDICTED: cationic amino acid transporter 7, chloroplastic-like [Fragaria vesca subsp. vesca]	2.53258	6.76674e-06	2.53071e-05	yes	up
maker-Fvb7-2-snap-gene-248.30	PREDICTED: phosphoglucan phosphatase LSF2, chloroplastic [Fragaria vesca subsp. vesca]	-1.19509	1.86939e-52	5.89439e-51	yes	down		maker-Fvb3-3-snap-gene-266.44	PREDICTED: methanol O-anthraniloyltransferase-like [Fragaria vesca subsp. vesca]	1.57553	0.00327393	0.0081634	yes	up
maker-Fvb1-2-snap-gene-10.84	PREDICTED: K(+) efflux antiporter 4-like [Fragaria vesca subsp. vesca]	-1.23556	9.17817e-05	0.000296544	yes	down		augustus_masked-Fvb3-3-processed-gene-243.17	PREDICTED: uncharacterized protein LOC101312901 [Fragaria vesca subsp. vesca]	3.53814	1.60441e-10	9.37233e-10	yes	up
maker-Fvb1-4-augustus-gene-69.45	PREDICTED: probable vacuolar amino acid transporter YPQ2 isoform X2 [Fragaria vesca subsp. vesca]	-1.71716	7.86158e-41	1.8095e-39	yes	down		MSTRG.56101	protein NSP-INTERACTING KINASE 1-like isoform X2 [Rosa chinensis]	1.23053	9.03256e-06	3.32938e-05	yes	up
maker-Fvb2-4-snap-gene-261.102	PREDICTED: probable 1-acyl-sn-glycerol-3-phosphate acyltransferase 4 isoform X2 [Fragaria vesca subsp. vesca]	-1.69444	3.87288e-10	2.19424e-09	yes	down		maker-Fvb3-1-augustus-gene-201.41	PREDICTED: LOW QUALITY PROTEIN: vicilin-like seed storage protein At2g18540 [Prunus mume]	1.08898	3.24787e-12	2.15267e-11	yes	up
maker-Fvb5-1-augustus-gene-193.32	PREDICTED: alpha/beta hydrolase domain-containing protein 17B [Fragaria vesca subsp. vesca]	-1.84007	2.56475e-07	1.12272e-06	yes	down		maker-Fvb2-2-augustus-gene-131.48	PREDICTED: ethylene-responsive transcription factor ABR1-like isoform X1 [Fragaria vesca subsp. vesca]	3.00501	0.000859295	0.00238084	yes	up
MSTRG.13803	PREDICTED: inorganic phosphate transporter 1-4 [Fragaria vesca subsp. vesca]	-1.40996	1.59747e-93	1.15329e-91	yes	down		MSTRG.49965	PREDICTED: probable protein S-acyltransferase 17 [Fragaria vesca subsp. vesca]	1.54401	7.53233e-17	6.71507e-16	yes	up
maker-Fvb3-3-augustus-gene-56.31	PREDICTED: zinc transporter 8-like [Fragaria vesca subsp. vesca]	-1.01267	4.52147e-05	0.000152489	yes	down		MSTRG.18931	linoleate 13S-lipoxygenase 3-1, chloroplastic-like isoform X1 [Rosa chinensis]	2.75276	5.37699e-07	2.27811e-06	yes	up
maker-Fvb7-2-snap-gene-317.82	PREDICTED: protein TRANSPARENT TESTA 12-like [Fragaria vesca subsp. vesca]	-1.58195	1.50186e-47	4.17201e-46	yes	down		MSTRG.31143	PREDICTED: fanconi-associated nuclease 1 homolog [Fragaria vesca subsp. vesca]	1.08246	1.29647e-21	1.46816e-20	yes	up
maker-Fvb3-2-augustus-gene-53.35	PREDICTED: GDP-L-galactose phosphorylase 1-like isoform X1 [Fragaria vesca subsp. vesca]	-1.92285	1.24564e-160	2.22464e-158	yes	down		augustus_masked-Fvb2-2-processed-gene-132.6	PREDICTED: uncharacterized protein LOC101310479 [Fragaria vesca subsp. vesca]	2.64265	4.08146e-21	4.51632e-20	yes	up
maker-Fvb6-3-augustus-gene-435.73	hypothetical protein RchiOBHm_Chr3g0461831 [Rosa chinensis]	-1.59403	1.82724e-07	8.10719e-07	yes	down		maker-Fvb5-3-augustus-gene-273.62	PREDICTED: L-lactate dehydrogenase A [Fragaria vesca subsp. vesca]	1.12931	0.000261443	0.000787738	yes	up
augustus_masked-Fvb5-1-processed-gene-245.11	PREDICTED: pentatricopeptide repeat-containing protein At1g71490 [Fragaria vesca subsp. vesca]	-1.05283	1.69264e-06	6.77704e-06	yes	down		augustus_masked-Fvb2-2-processed-gene-3.19	PREDICTED: transcription factor MYB44-like [Fragaria vesca subsp. vesca]	2.00764	5.0295e-106	4.52193e-104	yes	up
snap_masked-Fvb6-2-processed-gene-207.9	PREDICTED: probable pyridoxal 5&apos;-phosphate synthase subunit PDX1 [Fragaria vesca subsp. vesca]	-2.31911	4.31715e-10	2.43694e-09	yes	down		maker-Fvb6-4-augustus-gene-264.27	PREDICTED: dnaJ homolog subfamily B member 6 isoform X1 [Fragaria vesca subsp. vesca]	1.17275	1.18205e-47	3.29455e-46	yes	up
MSTRG.54	PREDICTED: ALA-interacting subunit 3-like [Fragaria vesca subsp. vesca]	-1.28813	8.77578e-25	1.1428e-23	yes	down		maker-Fvb6-2-snap-gene-106.36	PREDICTED: uncharacterized protein LOC105350684 [Fragaria vesca subsp. vesca]	1.95148	8.32099e-21	9.08298e-20	yes	up
maker-Fvb6-3-augustus-gene-273.47	PREDICTED: monodehydroascorbate reductase, seedling isozyme [Fragaria vesca subsp. vesca]	-2.16938	2.65394e-242	1.19073e-239	yes	down		maker-Fvb5-3-augustus-gene-193.54	PREDICTED: pectate lyase-like [Fragaria vesca subsp. vesca]	1.37005	3.63786e-41	8.44298e-40	yes	up
MSTRG.1085	PREDICTED: uncharacterized protein LOC101303521 [Fragaria vesca subsp. vesca]	-1.71185	3.47591e-104	3.03609e-102	yes	down		snap_masked-Fvb1-1-processed-gene-235.24	PREDICTED: ATP-dependent DNA helicase Q-like 3 isoform X2 [Fragaria vesca subsp. vesca]	2.03707	4.80749e-31	8.12222e-30	yes	up
MSTRG.37929	PREDICTED: short-chain dehydrogenase/reductase 2b-like [Fragaria vesca subsp. vesca]	-1.59401	3.48604e-22	4.0612e-21	yes	down		maker-Fvb4-3-snap-gene-90.56	putative RNA-directed DNA polymerase [Rosa chinensis]	1.94888	6.53172e-42	1.55396e-40	yes	up
maker-Fvb1-2-augustus-gene-39.57	PREDICTED: uncharacterized protein LOC101305100 [Fragaria vesca subsp. vesca]	-3.33171	1.22302e-33	2.23414e-32	yes	down		maker-Fvb2-3-augustus-gene-18.41	PREDICTED: lysM domain-containing GPI-anchored protein 1 [Fragaria vesca subsp. vesca]	1.43542	2.11674e-08	1.02961e-07	yes	up
maker-Fvb7-3-snap-gene-11.71	PREDICTED: topless-related protein 1-like isoform X3 [Fragaria vesca subsp. vesca]	-1.13439	4.49822e-28	6.73825e-27	yes	down		maker-Fvb7-2-snap-gene-88.30	PREDICTED: receptor-like protein 12 [Fragaria vesca subsp. vesca]	3.78788	1.16549e-21	1.3226e-20	yes	up
maker-Fvb7-1-augustus-gene-295.55	PREDICTED: starch synthase 1, chloroplastic/amyloplastic [Fragaria vesca subsp. vesca]	-2.10951	1.51966e-197	4.01644e-195	yes	down		maker-Fvb1-3-augustus-gene-71.53	PREDICTED: putative cell division cycle ATPase [Fragaria vesca subsp. vesca]	1.91492	0.00372864	0.00918612	yes	up
maker-Fvb4-4-augustus-gene-28.69	PREDICTED: alpha-amylase 3, chloroplastic isoform X1 [Fragaria vesca subsp. vesca]	-1.19942	2.26527e-75	1.15558e-73	yes	down		augustus_masked-Fvb6-4-processed-gene-290.14	PREDICTED: 36.4 kDa proline-rich protein [Fragaria vesca subsp. vesca]	2.23034	9.44976e-35	1.78361e-33	yes	up
augustus_masked-Fvb6-1-processed-gene-206.0	PREDICTED: uncharacterized protein LOC101295551 [Fragaria vesca subsp. vesca]	-1.62326	2.05264e-05	7.24487e-05	yes	down		maker-Fvb3-1-augustus-gene-31.30	PREDICTED: root phototropism protein 2 [Fragaria vesca subsp. vesca]	2.97753	1.02443e-96	7.7422e-95	yes	up
maker-Fvb7-3-augustus-gene-45.64	PREDICTED: acid phosphatase 1 [Fragaria vesca subsp. vesca]	-1.7795	1.31299e-07	5.91749e-07	yes	down		maker-Fvb7-1-augustus-gene-43.42	PREDICTED: uncharacterized protein LOC101298171 isoform X2 [Fragaria vesca subsp. vesca]	1.42929	1.93616e-44	4.93572e-43	yes	up
maker-Fvb4-1-augustus-gene-185.40	PREDICTED: adagio protein 3 [Fragaria vesca subsp. vesca]	-4.5544	0	0	yes	down		MSTRG.56951	PREDICTED: uncharacterized protein LOC105352336 [Fragaria vesca subsp. vesca]	1.28283	3.56018e-17	3.23344e-16	yes	up
maker-Fvb4-4-snap-gene-59.52	PREDICTED: ABC transporter B family member 26, chloroplastic [Fragaria vesca subsp. vesca]	-1.90553	7.16611e-74	3.5398e-72	yes	down		augustus_masked-Fvb3-3-processed-gene-156.9	PREDICTED: cytochrome P450 94C1-like [Fragaria vesca subsp. vesca]	4.17082	0.00294312	0.00740032	yes	up
MSTRG.18584	--	-1.22663	1.2525e-103	1.07764e-101	yes	down		MSTRG.26079	proline-rich receptor-like protein kinase PERK8 [Rosa chinensis]	2.25235	1.47233e-06	5.93943e-06	yes	up
maker-Fvb3-2-augustus-gene-170.28	PREDICTED: uncharacterized protein LOC101311538 [Fragaria vesca subsp. vesca]	-1.42846	1.1466e-69	5.31284e-68	yes	down		maker-Fvb7-1-snap-gene-49.32	PREDICTED: splicing factor 3A subunit 3-like isoform X1 [Fragaria vesca subsp. vesca]	1.26241	6.98769e-10	3.87636e-09	yes	up
maker-Fvb1-4-augustus-gene-146.27	PREDICTED: 2-oxoisovalerate dehydrogenase subunit alpha 2, mitochondrial [Fragaria vesca subsp. vesca]	-1.40567	7.15841e-27	1.01967e-25	yes	down		maker-Fvb3-2-snap-gene-268.59	PREDICTED: protein O-glucosyltransferase 1 [Fragaria vesca subsp. vesca]	2.9032	1.46242e-27	2.14321e-26	yes	up
augustus_masked-Fvb6-3-processed-gene-12.0	PREDICTED: cytochrome c1-2, heme protein, mitochondrial [Fragaria vesca subsp. vesca]	-1.24043	2.31831e-59	8.70677e-58	yes	down		maker-Fvb3-3-snap-gene-22.51	hypothetical protein RchiOBHm_Chr5g0011631 [Rosa chinensis]	1.87855	1.08892e-06	4.45351e-06	yes	up
maker-Fvb7-3-augustus-gene-32.66	PREDICTED: low-temperature-induced 65 kDa protein isoform X6 [Fragaria vesca subsp. vesca]	-7.60632	3.26624e-133	4.14367e-131	yes	down		maker-Fvb2-1-snap-gene-188.83	uncharacterized protein LOC112171676 [Rosa chinensis]	1.72659	0.0236793	0.0487526	yes	up
maker-Fvb7-3-augustus-gene-1.52	PREDICTED: beta-carotene hydroxylase 2, chloroplastic-like [Fragaria vesca subsp. vesca]	-2.58287	1.69635e-144	2.50038e-142	yes	down		maker-Fvb7-3-augustus-gene-19.48	PREDICTED: protein DEFECTIVE IN MERISTEM SILENCING 3-like [Fragaria vesca subsp. vesca]	1.171	1.39309e-07	6.25882e-07	yes	up
maker-Fvb7-1-augustus-gene-279.56	PREDICTED: LOW QUALITY PROTEIN: pentatricopeptide repeat-containing protein At4g25270, chloroplastic [Fragaria vesca subsp. vesca]	-1.34207	0.000271218	0.000814975	yes	down		MSTRG.43541	PREDICTED: dolichyl-diphosphooligosaccharide--protein glycosyltransferase 48 kDa subunit-like [Fragaria vesca subsp. vesca]	1.58427	0.000269731	0.000810824	yes	up
maker-Fvb4-2-snap-gene-143.31	PREDICTED: 15-cis-zeta-carotene isomerase, chloroplastic [Fragaria vesca subsp. vesca]	-1.55702	1.74224e-40	3.96744e-39	yes	down		snap_masked-Fvb1-3-processed-gene-188.17	PREDICTED: receptor-like serine/threonine-protein kinase At4g25390 [Fragaria vesca subsp. vesca]	3.15663	1.75549e-133	2.23015e-131	yes	up
maker-Fvb3-4-augustus-gene-213.53	PREDICTED: translation initiation factor IF-2, chloroplastic [Fragaria vesca subsp. vesca]	-1.31066	2.54121e-118	2.647e-116	yes	down		maker-Fvb1-1-augustus-gene-271.55	PREDICTED: serine carboxypeptidase 24 [Fragaria vesca subsp. vesca]	5.54944	5.15941e-06	1.95663e-05	yes	up
maker-Fvb2-2-augustus-gene-161.22	PREDICTED: uncharacterized protein LOC101295094 [Fragaria vesca subsp. vesca]	-1.12663	4.21507e-48	1.18885e-46	yes	down		MSTRG.7656	uncharacterized protein LOC112199219 [Rosa chinensis]	1.67468	0.00484884	0.0116724	yes	up
MSTRG.65586	proline-rich receptor-like protein kinase PERK10 [Rosa chinensis]	-2.71422	1.41815e-65	6.02198e-64	yes	down		snap_masked-Fvb1-3-processed-gene-188.25	hypothetical protein RchiOBHm_Chr2g0123801 [Rosa chinensis]	1.13355	1.02719e-44	2.63975e-43	yes	up
maker-Fvb6-1-augustus-gene-149.25	PREDICTED: ADP,ATP carrier protein 1, chloroplastic [Fragaria vesca subsp. vesca]	-1.88895	6.7704e-173	1.42498e-170	yes	down		MSTRG.27481	PREDICTED: ubiquitin-like-specific protease 1A [Fragaria vesca subsp. vesca]	1.84912	0.00453408	0.0109799	yes	up
maker-Fvb4-3-snap-gene-24.74	PREDICTED: uncharacterized protein LOC101294845 [Fragaria vesca subsp. vesca]	-1.08716	3.95946e-62	1.58475e-60	yes	down		maker-Fvb2-1-augustus-gene-170.43	PREDICTED: protein SUPPRESSOR OF npr1-1, CONSTITUTIVE 1-like [Fragaria vesca subsp. vesca]	4.51577	6.88729e-05	0.000226642	yes	up
maker-Fvb1-1-augustus-gene-238.48	PREDICTED: myb-related protein Hv1 [Fragaria vesca subsp. vesca]	-1.61836	0.0133014	0.0291473	yes	down		augustus_masked-Fvb7-3-processed-gene-115.18	PREDICTED: probable LRR receptor-like serine/threonine-protein kinase At3g47570 [Fragaria vesca subsp. vesca]	1.08001	0.0207031	0.0433371	yes	up
snap_masked-Fvb4-4-processed-gene-3.16	PREDICTED: uncharacterized protein LOC101312533 [Fragaria vesca subsp. vesca]	-1.61285	6.96615e-132	8.67007e-130	yes	down		augustus_masked-Fvb7-1-processed-gene-137.6	PREDICTED: uncharacterized protein LOC101300796 [Fragaria vesca subsp. vesca]	1.55504	1.0338e-06	4.24071e-06	yes	up
maker-Fvb4-3-augustus-gene-295.39	PREDICTED: kaempferol 3-O-beta-D-galactosyltransferase-like [Fragaria vesca subsp. vesca]	-4.32585	4.60723e-290	3.11585e-287	yes	down		maker-Fvb6-1-augustus-gene-230.32	PREDICTED: general transcription factor IIE subunit 1-like [Fragaria vesca subsp. vesca]	1.89658	3.25574e-14	2.47357e-13	yes	up
augustus_masked-Fvb5-3-processed-gene-159.4	receptor-like protein EIX1 [Rosa chinensis]	-1.30023	1.76291e-11	1.10611e-10	yes	down		maker-Fvb3-4-augustus-gene-30.49	PREDICTED: nardilysin-like isoform X1 [Fragaria vesca subsp. vesca]	1.95155	1.82228e-07	8.08675e-07	yes	up
snap_masked-Fvb5-2-processed-gene-37.49	PREDICTED: uncharacterized protein LOC105351484 [Fragaria vesca subsp. vesca]	-1.0589	2.20245e-10	1.27244e-09	yes	down		MSTRG.50205	metal tolerance protein 11 isoform X1 [Rosa chinensis]	2.02933	2.90321e-06	1.13565e-05	yes	up
maker-Fvb7-1-augustus-gene-176.35	PREDICTED: E3 ubiquitin-protein ligase At3g02290 [Fragaria vesca subsp. vesca]	-1.19927	3.36589e-17	3.06152e-16	yes	down		augustus_masked-Fvb5-1-processed-gene-16.2	PREDICTED: 60S ribosomal protein L26-1 [Pyrus x bretschneideri]	1.00111	2.99203e-24	3.79946e-23	yes	up
maker-Fvb3-3-augustus-gene-288.37	PREDICTED: TMV resistance protein N-like [Fragaria vesca subsp. vesca]	-1.05873	0.00248539	0.00634039	yes	down		maker-Fvb2-2-augustus-gene-213.26	uncharacterized protein LOC112172579 [Rosa chinensis]	1.67336	7.44232e-46	1.97894e-44	yes	up
augustus_masked-Fvb4-3-processed-gene-300.3	PREDICTED: serine/threonine-protein kinase BLUS1 [Fragaria vesca subsp. vesca]	-1.12794	4.78323e-07	2.03762e-06	yes	down		maker-Fvb5-1-augustus-gene-76.62	PREDICTED: transcription factor MYB108-like [Fragaria vesca subsp. vesca]	3.138	3.42119e-08	1.63269e-07	yes	up
maker-Fvb4-1-augustus-gene-174.65	PREDICTED: sphinganine C(4)-monooxygenase 1 [Fragaria vesca subsp. vesca]	-1.20155	6.42525e-33	1.15086e-31	yes	down		maker-Fvb3-2-augustus-gene-102.33	PREDICTED: protochlorophyllide reductase, chloroplastic [Fragaria vesca subsp. vesca]	1.02922	3.60284e-50	1.06688e-48	yes	up
maker-Fvb4-1-snap-gene-136.57	PREDICTED: uncharacterized protein LOC101315017 [Fragaria vesca subsp. vesca]	-1.24666	0.0202455	0.0424642	yes	down		maker-Fvb3-1-augustus-gene-318.57	PREDICTED: pentatricopeptide repeat-containing protein At4g02750-like [Fragaria vesca subsp. vesca]	1.86814	1.81946e-07	8.07578e-07	yes	up
augustus_masked-Fvb5-2-processed-gene-92.3	PREDICTED: uncharacterized protein At5g50100, mitochondrial [Fragaria vesca subsp. vesca]	-2.02527	1.88141e-188	4.47144e-186	yes	down		maker-Fvb3-3-augustus-gene-22.41	PREDICTED: probable WRKY transcription factor 65 isoform X1 [Fragaria vesca subsp. vesca]	1.84101	4.04637e-33	7.29887e-32	yes	up
augustus_masked-Fvb5-4-processed-gene-46.7	PREDICTED: transcription factor ICE1 [Fragaria vesca subsp. vesca]	-1.30458	1.41925e-26	1.99323e-25	yes	down		augustus_masked-Fvb7-1-processed-gene-300.4	PREDICTED: small heat shock protein, chloroplastic-like [Fragaria vesca subsp. vesca]	4.75482	0.000266812	0.000802759	yes	up
maker-Fvb2-1-augustus-gene-5.65	PREDICTED: cleavage and polyadenylation specificity factor subunit 6 [Fragaria vesca subsp. vesca]	-2.12261	0.000999502	0.0027348	yes	down		maker-Fvb1-4-augustus-gene-33.51	PREDICTED: cytokinin dehydrogenase 3 [Fragaria vesca subsp. vesca]	4.1906	8.94225e-09	4.51288e-08	yes	up
maker-Fvb3-3-augustus-gene-42.40	PREDICTED: uncharacterized oxidoreductase C663.09c [Fragaria vesca subsp. vesca]	-1.65646	5.10228e-53	1.62947e-51	yes	down		maker-Fvb5-1-augustus-gene-2.35	PREDICTED: uncharacterized protein LOC101307119 isoform X1 [Fragaria vesca subsp. vesca]	2.87006	2.70195e-05	9.38394e-05	yes	up
maker-Fvb6-4-augustus-gene-298.47	PREDICTED: uncharacterized aarF domain-containing protein kinase At1g79600, chloroplastic [Fragaria vesca subsp. vesca]	-1.84813	3.25236e-216	1.06835e-213	yes	down		MSTRG.65819	PREDICTED: protein EXORDIUM-like 3 [Fragaria vesca subsp. vesca]	2.28759	3.4137e-10	1.94173e-09	yes	up
maker-Fvb6-1-augustus-gene-313.60	PREDICTED: uncharacterized protein LOC101291443 [Fragaria vesca subsp. vesca]	-1.14432	7.30918e-09	3.71666e-08	yes	down		maker-Fvb6-3-augustus-gene-288.28	PREDICTED: serine/threonine-protein phosphatase 2A 65 kDa regulatory subunit A beta isoform-like [Fragaria vesca subsp. vesca]	1.13473	5.57888e-08	2.61451e-07	yes	up
maker-Fvb6-2-snap-gene-135.48	PREDICTED: ABC transporter G family member 22 isoform X2 [Fragaria vesca subsp. vesca]	-1.17588	2.77632e-84	1.7161e-82	yes	down		maker-Fvb7-3-augustus-gene-247.31	PREDICTED: uncharacterized protein LOC105352789 [Fragaria vesca subsp. vesca]	2.97215	5.92941e-08	2.77138e-07	yes	up
maker-Fvb6-3-augustus-gene-183.23	PREDICTED: uncharacterized protein LOC101292722 [Fragaria vesca subsp. vesca]	-1.07277	6.74032e-11	4.053e-10	yes	down		maker-Fvb6-1-augustus-gene-72.46	PREDICTED: putative calcium-transporting ATPase 13, plasma membrane-type [Fragaria vesca subsp. vesca]	1.32792	2.23722e-07	9.84173e-07	yes	up
augustus_masked-Fvb5-1-processed-gene-8.2	PREDICTED: transcription factor TCP9-like [Fragaria vesca subsp. vesca]	-1.07818	4.8324e-09	2.4991e-08	yes	down		augustus_masked-Fvb4-4-processed-gene-82.3	PREDICTED: PI-PLC X-box domain-containing protein DDB_G0293730-like [Fragaria vesca subsp. vesca]	3.84505	3.77843e-05	0.000128708	yes	up
MSTRG.4234	PREDICTED: heptahelical transmembrane protein 1 isoform X1 [Fragaria vesca subsp. vesca]	-1.01947	4.97406e-29	7.75413e-28	yes	down		maker-Fvb3-4-snap-gene-93.26	PREDICTED: protein ENHANCED DISEASE RESISTANCE 2-like isoform X1 [Fragaria vesca subsp. vesca]	1.6671	1.61092e-29	2.57635e-28	yes	up
maker-Fvb7-3-augustus-gene-154.39	PREDICTED: pentatricopeptide repeat-containing protein At1g02150 [Fragaria vesca subsp. vesca]	-1.28406	2.65457e-21	2.96163e-20	yes	down		snap_masked-Fvb1-2-processed-gene-62.28	PREDICTED: protein TIFY 10A [Fragaria vesca subsp. vesca]	1.20941	1.30092e-21	1.47302e-20	yes	up
augustus_masked-Fvb3-4-processed-gene-115.1	PREDICTED: protein TIC 20-v, chloroplastic [Fragaria vesca subsp. vesca]	-1.72197	1.60583e-27	2.34776e-26	yes	down		augustus_masked-Fvb7-1-processed-gene-280.7	PREDICTED: structural maintenance of chromosomes protein 2-1-like [Fragaria vesca subsp. vesca]	1.37223	0.000161547	0.00050206	yes	up
maker-Fvb7-1-snap-gene-263.81	PREDICTED: dehydration-responsive element-binding protein 2A-like [Fragaria vesca subsp. vesca]	-1.77313	3.02434e-27	4.36957e-26	yes	down		maker-Fvb7-3-augustus-gene-65.46	putative disease resistance protein RGA3 isoform X1 [Rosa chinensis]	1.2692	1.88768e-11	1.18142e-10	yes	up
augustus_masked-Fvb5-3-processed-gene-204.8	PREDICTED: uncharacterized protein LOC101311283 [Fragaria vesca subsp. vesca]	-1.10508	5.2519e-33	9.44007e-32	yes	down		maker-Fvb7-1-snap-gene-285.64	PREDICTED: DNA-directed RNA polymerase III subunit RPC3 [Fragaria vesca subsp. vesca]	1.1383	0.0100853	0.0227104	yes	up
maker-Fvb5-3-augustus-gene-69.25	PREDICTED: protein NRT1/ PTR FAMILY 5.10-like [Fragaria vesca subsp. vesca]	-1.5625	6.77516e-14	5.056e-13	yes	down		maker-Fvb5-3-augustus-gene-160.52	PREDICTED: uncharacterized protein LOC101304099 [Fragaria vesca subsp. vesca]	1.23606	3.43402e-07	1.48697e-06	yes	up
MSTRG.35959	PREDICTED: mitochondrial import receptor subunit TOM5 homolog [Fragaria vesca subsp. vesca]	-1.55693	3.90143e-11	2.38748e-10	yes	down		maker-Fvb3-4-snap-gene-208.71	PREDICTED: cullin-1-like [Fragaria vesca subsp. vesca]	1.39344	0.0185888	0.0393773	yes	up
maker-Fvb6-1-augustus-gene-332.52	PREDICTED: root phototropism protein 3-like [Fragaria vesca subsp. vesca]	-2.53298	2.95799e-193	7.43345e-191	yes	down		maker-Fvb1-4-snap-gene-187.17	mediator of RNA polymerase II transcription subunit 30 isoform X2 [Rosa chinensis]	1.63019	0.0100496	0.0226383	yes	up
maker-Fvb3-3-snap-gene-251.60	PREDICTED: protein DAMAGED DNA-BINDING 2 [Fragaria vesca subsp. vesca]	-2.76861	3.80705e-05	0.000129597	yes	down		snap_masked-Fvb5-1-processed-gene-200.33	PREDICTED: RING-H2 finger protein ATL52 [Fragaria vesca subsp. vesca]	1.08002	2.72361e-05	9.45559e-05	yes	up
MSTRG.56252	--	-1.2499	3.15498e-17	2.87366e-16	yes	down		maker-Fvb5-1-augustus-gene-110.46	PREDICTED: probable aquaporin TIP3-2 [Fragaria vesca subsp. vesca]	1.15159	0.000210568	0.0006439	yes	up
maker-Fvb6-4-snap-gene-11.66	PREDICTED: 28 kDa ribonucleoprotein, chloroplastic-like [Fragaria vesca subsp. vesca]	-1.35468	2.55438e-83	1.54872e-81	yes	down		maker-Fvb1-3-snap-gene-29.60	programmed cell death-4 [Fragaria vesca]	1.51092	1.30721e-07	5.89257e-07	yes	up
maker-Fvb2-4-augustus-gene-239.53	PREDICTED: probably inactive leucine-rich repeat receptor-like protein kinase At2g25790 [Fragaria vesca subsp. vesca]	-1.20262	0.00207095	0.00535306	yes	down		augustus_masked-Fvb7-3-processed-gene-18.11	PREDICTED: cell division control protein 48-like [Fragaria vesca subsp. vesca]	2.21819	7.45394e-08	3.44861e-07	yes	up
maker-Fvb5-2-augustus-gene-98.36	PREDICTED: tubulin beta chain-like [Fragaria vesca subsp. vesca]	-1.20324	2.03921e-58	7.46648e-57	yes	down		augustus_masked-Fvb3-2-processed-gene-169.4	PREDICTED: F-box protein At2g27310-like [Fragaria vesca subsp. vesca]	4.76104	3.66361e-23	4.44427e-22	yes	up
MSTRG.26961	hypothetical protein PRdownE_1G452900 [Prunus persica]	-1.00838	2.67698e-57	9.57674e-56	yes	down		snap_masked-Fvb4-4-processed-gene-145.16	PREDICTED: F-box/kelch-repeat protein At3g23880 [Fragaria vesca subsp. vesca]	4.63198	0.00668883	0.0156614	yes	up
maker-Fvb1-3-snap-gene-75.65	PREDICTED: cytochrome P450 90B1 [Fragaria vesca subsp. vesca]	-1.16662	4.7835e-14	3.606e-13	yes	down		augustus_masked-Fvb5-3-processed-gene-247.10	uncharacterized protein LOC112176777 [Rosa chinensis]	2.04371	5.92544e-11	3.57845e-10	yes	up
maker-Fvb4-2-augustus-gene-16.46	PREDICTED: pectinesterase [Fragaria vesca subsp. vesca]	-1.64103	1.16596e-63	4.79824e-62	yes	down		maker-Fvb7-1-snap-gene-59.32	PREDICTED: GABA transporter 1-like [Fragaria vesca subsp. vesca]	1.83431	6.6647e-14	4.97801e-13	yes	up
augustus_masked-Fvb1-4-processed-gene-14.12	PREDICTED: glucan endo-1,3-beta-glucosidase 14 [Fragaria vesca subsp. vesca]	-1.4885	8.83241e-16	7.40605e-15	yes	down		augustus_masked-Fvb5-3-processed-gene-22.16	PREDICTED: probable LRR receptor-like serine/threonine-protein kinase At4g08850 [Fragaria vesca subsp. vesca]	2.42429	0.0171022	0.0365412	yes	up
maker-Fvb2-2-augustus-gene-41.39	PREDICTED: protein TRANSPARENT TESTA 12-like [Fragaria vesca subsp. vesca]	-1.31029	2.95372e-21	3.2894e-20	yes	down		augustus_masked-Fvb6-3-processed-gene-310.1	PREDICTED: protein fluG [Fragaria vesca subsp. vesca]	1.0352	1.84237e-18	1.78674e-17	yes	up
maker-Fvb4-2-snap-gene-10.67	PREDICTED: DEAD-box ATP-dependent RNA helicase ISE2, chloroplastic [Fragaria vesca subsp. vesca]	-1.8836	5.65682e-51	1.71997e-49	yes	down		augustus_masked-Fvb4-4-processed-gene-110.6	PREDICTED: BAHD acyltransferase At5g47980-like [Fragaria vesca subsp. vesca]	3.38173	0.00665055	0.0155809	yes	up
maker-Fvb2-2-augustus-gene-45.56	PREDICTED: blue-light photoreceptor PHR2 [Fragaria vesca subsp. vesca]	-1.69529	3.28368e-103	2.80687e-101	yes	down		maker-Fvb5-2-augustus-gene-198.31	PREDICTED: beta-xylosidase/alpha-L-arabinofuranosidase 2-like isoform X1 [Fragaria vesca subsp. vesca]	2.14772	1.45789e-25	1.9647e-24	yes	up
maker-Fvb6-3-augustus-gene-8.34	PREDICTED: glycerophosphodiester phosphodiesterase GDPD1, chloroplastic-like [Fragaria vesca subsp. vesca]	-1.15678	4.10054e-23	4.96447e-22	yes	down		maker-Fvb6-3-snap-gene-190.24	PREDICTED: pentatricopeptide repeat-containing protein At1g80270, mitochondrial-like [Fragaria vesca subsp. vesca]	1.07942	3.40584e-43	8.40278e-42	yes	up
maker-Fvb1-3-snap-gene-10.64	PREDICTED: uncharacterized protein LOC101297283 [Fragaria vesca subsp. vesca]	-1.67265	8.4778e-38	1.76655e-36	yes	down		maker-Fvb4-3-augustus-gene-277.23	PREDICTED: cycloartenol synthase 2 [Fragaria vesca subsp. vesca]	2.0686	3.26551e-151	5.26004e-149	yes	up
maker-Fvb5-1-snap-gene-12.58	PREDICTED: uncharacterized protein LOC101313699 isoform X1 [Fragaria vesca subsp. vesca]	-3.34323	0	0	yes	down		snap_masked-Fvb1-2-processed-gene-44.44	PREDICTED: uncharacterized protein LOC101298453 [Fragaria vesca subsp. vesca]	1.00438	0.008124	0.0186915	yes	up
maker-Fvb7-2-snap-gene-10.38	PREDICTED: polyketide synthase 1 [Fragaria vesca subsp. vesca]	-3.90197	0	0	yes	down		snap_masked-Fvb4-4-processed-gene-36.50	PREDICTED: probable inactive purple acid phosphatase 1 isoform X1 [Fragaria vesca subsp. vesca]	1.3516	6.52922e-38	1.36702e-36	yes	up
maker-Fvb3-2-snap-gene-262.42	PREDICTED: uncharacterized protein LOC101301471 [Fragaria vesca subsp. vesca]	-1.18325	6.61989e-09	3.37793e-08	yes	down		maker-Fvb6-1-augustus-gene-59.61	PREDICTED: probable terpene synthase 9 [Fragaria vesca subsp. vesca]	1.27188	1.94635e-09	1.04007e-08	yes	up
maker-Fvb4-2-snap-gene-116.42	PREDICTED: uncharacterized protein LOC101305932 [Fragaria vesca subsp. vesca]	-1.98662	2.00248e-16	1.74018e-15	yes	down		maker-Fvb2-1-snap-gene-130.39	PREDICTED: glutathione transferase GST 23-like [Fragaria vesca subsp. vesca]	2.50537	3.98594e-16	3.40337e-15	yes	up
maker-Fvb3-2-augustus-gene-32.57	PREDICTED: tobamovirus multiplication protein 1 [Fragaria vesca subsp. vesca]	-1.01562	1.27961e-12	8.74457e-12	yes	down		maker-Fvb1-3-augustus-gene-69.57	PREDICTED: bifunctional epoxide hydrolase 2-like [Fragaria vesca subsp. vesca]	2.43146	0.00505014	0.0121116	yes	up
augustus_masked-Fvb5-2-processed-gene-2.3	PREDICTED: alternative NAD(P)H-ubiquinone oxidoreductase C1, chloroplastic/mitochondrial [Fragaria vesca subsp. vesca]	-1.40173	1.46757e-39	3.23308e-38	yes	down		maker-Fvb2-4-augustus-gene-257.44	PREDICTED: BTB/POZ domain-containing protein At2g30600 [Fragaria vesca subsp. vesca]	2.03869	3.60044e-274	2.1644e-271	yes	up
MSTRG.743	2-alkenal reductase (NADP(+)-dependent)-like [Rosa chinensis]	-1.50368	1.19702e-36	2.41653e-35	yes	down		snap_masked-Fvb4-1-processed-gene-193.22	PREDICTED: myosin heavy chain kinase B [Fragaria vesca subsp. vesca]	3.5305	4.22378e-118	4.38967e-116	yes	up
maker-Fvb3-1-augustus-gene-304.62	anthocyanidin reductase [Fragaria x ananassa]	-2.56542	2.59416e-233	1.01532e-230	yes	down		maker-Fvb1-1-snap-gene-263.62	PREDICTED: 36.4 kDa proline-rich protein [Fragaria vesca subsp. vesca]	6.42849	1.13231e-195	2.91724e-193	yes	up
maker-Fvb1-2-augustus-gene-231.17	PREDICTED: NADH dehydrogenase [ubiquinone] iron-sulfur protein 1, mitochondrial [Fragaria vesca subsp. vesca]	-1.2097	4.48626e-60	1.71286e-58	yes	down		maker-Fvb5-3-augustus-gene-241.51	PREDICTED: uncharacterized protein LOC101311572 [Fragaria vesca subsp. vesca]	2.03406	1.2287e-77	6.54756e-76	yes	up
snap_masked-Fvb6-3-processed-gene-346.32	PREDICTED: glycerol-3-phosphate 2-O-acyltransferase 6 [Fragaria vesca subsp. vesca]	-1.37215	4.54827e-05	0.000153364	yes	down		maker-Fvb5-2-augustus-gene-145.32	PREDICTED: CSC1-like protein At1g32090 [Fragaria vesca subsp. vesca]	1.7563	6.96058e-05	0.000228849	yes	up
augustus_masked-Fvb5-3-processed-gene-205.5	PREDICTED: pentatricopeptide repeat-containing protein PNM1, mitochondrial [Fragaria vesca subsp. vesca]	-1.52515	0.000108234	0.000345575	yes	down		maker-Fvb5-3-snap-gene-251.67	PREDICTED: DNA primase small subunit [Fragaria vesca subsp. vesca]	1.46197	0.0164763	0.0353344	yes	up
maker-Fvb7-2-augustus-gene-245.69	PREDICTED: multiple inositol polyphosphate phosphatase 1 isoform X1 [Fragaria vesca subsp. vesca]	-1.01132	2.53138e-10	1.45453e-09	yes	down		maker-Fvb6-3-snap-gene-299.44	PREDICTED: uncharacterized protein LOC101294888 [Fragaria vesca subsp. vesca]	1.35835	2.83972e-17	2.59165e-16	yes	up
augustus_masked-Fvb2-1-processed-gene-5.2	PREDICTED: dirigent protein 23-like [Fragaria vesca subsp. vesca]	-1.0542	1.64944e-13	1.2008e-12	yes	down		maker-Fvb5-4-augustus-gene-56.47	PREDICTED: putative F-box protein PP2-B12 [Fragaria vesca subsp. vesca]	1.05123	0.0202228	0.0424185	yes	up
MSTRG.29463	PREDICTED: uncharacterized protein LOC101290966 [Fragaria vesca subsp. vesca]	-2.85499	2.94014e-10	1.68131e-09	yes	down		augustus_masked-Fvb1-4-processed-gene-28.6	PREDICTED: meiotic nuclear division protein 1 homolog [Fragaria vesca subsp. vesca]	2.28174	0.000527557	0.00151387	yes	up
maker-Fvb2-1-augustus-gene-69.32	PREDICTED: laccase-15-like [Fragaria vesca subsp. vesca]	-1.53234	1.06824e-06	4.37357e-06	yes	down		maker-Fvb3-2-augustus-gene-206.23	PREDICTED: disease resistance protein At4g27190-like [Pyrus x bretschneideri]	2.47331	6.57911e-55	2.2117e-53	yes	up
maker-Fvb7-4-augustus-gene-231.28	PREDICTED: protein YLS3-like [Fragaria vesca subsp. vesca]	-1.23557	4.49781e-06	1.71798e-05	yes	down		augustus_masked-Fvb6-4-processed-gene-144.4	hypothetical protein RchiOBHm_Chr3g0475851 [Rosa chinensis]	4.77059	0.000350672	0.00103589	yes	up
snap_masked-Fvb7-3-processed-gene-107.14	PREDICTED: hydroquinone glucosyltransferase-like [Fragaria vesca subsp. vesca]	-1.89456	3.20183e-54	1.05553e-52	yes	down		augustus_masked-Fvb5-1-processed-gene-19.0	PREDICTED: uncharacterized protein LOC101295050 [Fragaria vesca subsp. vesca]	2.38496	2.89352e-40	6.53573e-39	yes	up
maker-Fvb2-4-snap-gene-93.32	PREDICTED: uncharacterized protein LOC101309690 [Fragaria vesca subsp. vesca]	-1.06946	2.77608e-49	8.05466e-48	yes	down		MSTRG.59267	PREDICTED: 5&apos;-3&apos; exoribonuclease 3-like isoform X1 [Fragaria vesca subsp. vesca]	2.4082	5.2132e-54	1.71246e-52	yes	up
maker-Fvb3-1-augustus-gene-222.45	PREDICTED: probable solanesyl-diphosphate synthase 3, chloroplastic [Fragaria vesca subsp. vesca]	-1.67601	1.33244e-146	2.02901e-144	yes	down		MSTRG.36260	PREDICTED: uncharacterized protein LOC105353398, partial [Fragaria vesca subsp. vesca]	1.98226	1.852e-05	6.57224e-05	yes	up
maker-Fvb3-3-augustus-gene-168.16	PREDICTED: glucan endo-1,3-beta-glucosidase-like [Fragaria vesca subsp. vesca]	-1.2983	3.2438e-07	1.40805e-06	yes	down		MSTRG.46189	PREDICTED: F-box/LRR-repeat protein 13 [Fragaria vesca subsp. vesca]	2.15844	4.87758e-128	5.83381e-126	yes	up
maker-Fvb5-3-augustus-gene-215.61	hypothetical protein RchiOBHm_Chr7g0186221 [Rosa chinensis]	-1.70485	2.58093e-39	5.64528e-38	yes	down		maker-Fvb7-1-snap-gene-288.69	PREDICTED: LOW QUALITY PROTEIN: NO-associated protein 1, chloroplastic/mitochondrial-like [Fragaria vesca subsp. vesca]	2.28655	0.0146997	0.0318821	yes	up
augustus_masked-Fvb6-4-processed-gene-4.11	PREDICTED: UDP-glycosyltransferase 90A1 [Fragaria vesca subsp. vesca]	-1.23313	3.65178e-75	1.85567e-73	yes	down		augustus_masked-Fvb6-1-processed-gene-28.17	PREDICTED: zinc finger AN1 domain-containing stress-associated protein 12 [Fragaria vesca subsp. vesca]	3.85094	2.23709e-07	9.84161e-07	yes	up
maker-Fvb1-4-snap-gene-68.36	PREDICTED: uncharacterized protein LOC101296107 [Fragaria vesca subsp. vesca]	-1.37374	4.19133e-36	8.29036e-35	yes	down		maker-Fvb5-1-augustus-gene-282.35	putative endonuclease/exonuclease/phosphatase [Rosa chinensis]	1.21973	0.000106867	0.000341578	yes	up
augustus_masked-Fvb2-3-processed-gene-112.15	PREDICTED: tyrosine decarboxylase 1 [Fragaria vesca subsp. vesca]	-2.17271	0.00255285	0.00649942	yes	down		augustus_masked-Fvb1-3-processed-gene-157.4	PREDICTED: G-type lectin S-receptor-like serine/threonine-protein kinase RLK1 [Fragaria vesca subsp. vesca]	1.32624	8.13455e-21	8.88578e-20	yes	up
augustus_masked-Fvb1-2-processed-gene-53.12	PREDICTED: cysteine-rich receptor-like protein kinase 7 [Fragaria vesca subsp. vesca]	-1.02074	4.14823e-13	2.93152e-12	yes	down		augustus_masked-Fvb3-4-processed-gene-207.5	PREDICTED: mediator of RNA polymerase II transcription subunit 19a-like [Fragaria vesca subsp. vesca]	2.36408	5.33828e-14	4.01204e-13	yes	up
maker-Fvb2-2-augustus-gene-44.58	PREDICTED: APO protein 2, chloroplastic [Fragaria vesca subsp. vesca]	-1.07045	2.53633e-23	3.09844e-22	yes	down		maker-Fvb2-4-augustus-gene-13.32	PREDICTED: squalene monooxygenase-like [Fragaria vesca subsp. vesca]	2.37566	1.23649e-53	4.02007e-52	yes	up
maker-Fvb5-1-augustus-gene-33.36	PREDICTED: mitochondrial inner membrane protein OXA1 [Fragaria vesca subsp. vesca]	-1.51971	1.69291e-38	3.61019e-37	yes	down		augustus_masked-Fvb2-3-processed-gene-115.14	PREDICTED: signal recognition particle 43 kDa protein, chloroplastic [Fragaria vesca subsp. vesca]	1.50132	2.91257e-12	1.93686e-11	yes	up
maker-Fvb3-4-augustus-gene-213.48	PREDICTED: probable glutathione S-transferase [Fragaria vesca subsp. vesca]	-2.11896	3.57008e-132	4.47359e-130	yes	down		MSTRG.58364	ABC transporter B family member 11-like [Rosa chinensis]	2.35902	2.47099e-05	8.6251e-05	yes	up
maker-Fvb2-4-snap-gene-258.105	eugenol synthase 1a [Fragaria x ananassa]	-1.07682	6.94445e-14	5.17645e-13	yes	down		maker-Fvb7-1-augustus-gene-303.42	putative lyase [Rosa chinensis]	3.62007	0.0235729	0.0485604	yes	up
augustus_masked-Fvb6-3-processed-gene-196.11	PREDICTED: uncharacterized protein LOC101304307 isoform X1 [Fragaria vesca subsp. vesca]	-1.66363	2.85398e-29	4.4979e-28	yes	down		snap_masked-Fvb2-1-processed-gene-217.33	PREDICTED: probable strigolactone esterase DAD2 [Fragaria vesca subsp. vesca]	1.30775	5.00652e-05	0.000167776	yes	up
maker-Fvb2-2-augustus-gene-50.48	PREDICTED: glutaredoxin-C11 [Fragaria vesca subsp. vesca]	-1.06616	2.71502e-50	8.06838e-49	yes	down		maker-Fvb4-4-augustus-gene-161.40	protein MAIN-LIKE 2 [Prunus persica]	1.95952	0.00553784	0.0131854	yes	up
snap_masked-Fvb5-1-processed-gene-32.37	PREDICTED: ethylene-responsive transcription factor ERF061 [Fragaria vesca subsp. vesca]	-3.32566	0.000535126	0.00153358	yes	down		MSTRG.47158	PREDICTED: uncharacterized protein LOC101313816 [Fragaria vesca subsp. vesca]	1.05392	1.11088e-19	1.14584e-18	yes	up
maker-Fvb3-4-augustus-gene-108.30	PREDICTED: serine carboxypeptidase-like 13 [Fragaria vesca subsp. vesca]	-2.72867	6.7607e-62	2.68954e-60	yes	down		snap_masked-Fvb6-2-processed-gene-316.35	PREDICTED: uncharacterized protein LOC101290690 [Fragaria vesca subsp. vesca]	1.2426	4.4223e-05	0.000149325	yes	up
maker-Fvb1-3-augustus-gene-250.19	PREDICTED: nudix hydrolase 18, mitochondrial-like [Fragaria vesca subsp. vesca]	-1.57869	1.32015e-20	1.42414e-19	yes	down		MSTRG.64674	PREDICTED: fasciclin-like arabinogalactan protein 10 [Fragaria vesca subsp. vesca]	1.12987	7.97508e-09	4.03941e-08	yes	up
maker-Fvb5-1-augustus-gene-7.57	anthocyanidin synthase [Fragaria x ananassa]	-2.00264	1.18305e-45	3.13129e-44	yes	down		maker-Fvb7-3-augustus-gene-21.24	PREDICTED: wall-associated receptor kinase 1-like isoform X2 [Fragaria vesca subsp. vesca]	1.73641	1.89091e-62	7.59802e-61	yes	up
maker-Fvb6-3-augustus-gene-347.45	PREDICTED: vacuolar cation/proton exchanger 3 [Fragaria vesca subsp. vesca]	-1.43232	4.98928e-57	1.77111e-55	yes	down		maker-Fvb5-1-snap-gene-211.38	PREDICTED: 60S ribosomal protein L10-like isoform X4 [Fragaria vesca subsp. vesca]	1.01154	1.31153e-18	1.28192e-17	yes	up
maker-Fvb7-4-augustus-gene-128.21	PREDICTED: 4-hydroxy-tetrahydrodipicolinate synthase, chloroplastic-like isoform X1 [Fragaria vesca subsp. vesca]	-1.00505	6.0393e-34	1.11317e-32	yes	down		maker-Fvb7-1-augustus-gene-0.33	PREDICTED: uncharacterized protein LOC105352787 [Fragaria vesca subsp. vesca]	5.63624	2.1126e-23	2.58768e-22	yes	up
maker-Fvb6-3-augustus-gene-14.53	PREDICTED: succinate dehydrogenase [ubiquinone] iron-sulfur subunit 2, mitochondrial-like [Fragaria vesca subsp. vesca]	-1.28901	8.86368e-28	1.31364e-26	yes	down		MSTRG.28662	G-type lectin S-receptor-like serine/threonine-protein kinase At1g34300 [Rosa chinensis]	1.64681	2.41923e-13	1.74218e-12	yes	up
snap_masked-Fvb6-2-processed-gene-248.29	PREDICTED: dnaJ homolog subfamily B member 3 [Fragaria vesca subsp. vesca]	-1.96032	1.16094e-113	1.14079e-111	yes	down		augustus_masked-Fvb3-4-processed-gene-119.2	gibberellin 3-beta-dioxygenase 1-like [Rosa chinensis]	1.56866	5.94831e-06	2.23892e-05	yes	up
snap_masked-Fvb7-3-processed-gene-13.37	PREDICTED: LOW QUALITY PROTEIN: 4-coumarate--CoA ligase 2-like [Fragaria vesca subsp. vesca]	-2.15674	2.21362e-80	1.23844e-78	yes	down		maker-Fvb1-3-snap-gene-269.23	PREDICTED: K(+) efflux antiporter 1, chloroplastic [Pyrus x bretschneideri]	1.70491	3.2629e-05	0.000112048	yes	up
snap_masked-Fvb3-3-processed-gene-247.20	PREDICTED: alpha-glucan phosphorylase, H isozyme [Fragaria vesca subsp. vesca]	-3.02391	0	0	yes	down		augustus_masked-Fvb1-4-processed-gene-68.5	PREDICTED: UPF0496 protein At2g18630-like [Fragaria vesca subsp. vesca]	1.10644	3.39351e-12	2.2458e-11	yes	up
augustus_masked-Fvb3-4-processed-gene-201.8	PREDICTED: uncharacterized protein LOC105350456 [Fragaria vesca subsp. vesca]	-1.4673	2.57537e-09	1.36479e-08	yes	down		augustus_masked-Fvb4-3-processed-gene-68.6	PREDICTED: fanconi-associated nuclease 1 homolog [Fragaria vesca subsp. vesca]	1.08246	1.29647e-21	1.46816e-20	yes	up
MSTRG.41038	PREDICTED: pentatricopeptide repeat-containing protein At5g46580, chloroplastic [Fragaria vesca subsp. vesca]	-1.24324	3.99571e-78	2.15422e-76	yes	down		snap_masked-Fvb7-1-processed-gene-166.17	PREDICTED: mitogen-activated protein kinase kinase kinase 2-like isoform X2 [Fragaria vesca subsp. vesca]	2.84537	2.94309e-05	0.000101673	yes	up
snap_masked-Fvb1-2-processed-gene-126.24	cinnamyl alcohol dehydrogenase [Fragaria x ananassa]	-1.66446	3.86945e-05	0.000131614	yes	down		maker-Fvb2-4-snap-gene-58.26	PREDICTED: BURP domain-containing protein 3-like [Fragaria vesca subsp. vesca]	2.65912	0.00241039	0.00616325	yes	up
augustus_masked-Fvb2-2-processed-gene-148.3	PREDICTED: uncharacterized protein LOC105349701 [Fragaria vesca subsp. vesca]	-2.26841	2.19562e-07	9.66565e-07	yes	down		maker-Fvb2-1-augustus-gene-263.43	PREDICTED: chorismate mutase 2 [Fragaria vesca subsp. vesca]	1.13607	1.23261e-12	8.43029e-12	yes	up
maker-Fvb7-1-snap-gene-173.56	PREDICTED: uncharacterized protein LOC101303265 [Fragaria vesca subsp. vesca]	-1.02649	7.17771e-46	1.91079e-44	yes	down		maker-Fvb4-4-snap-gene-48.59	PREDICTED: tetraketide alpha-pyrone reductase 2-like [Fragaria vesca subsp. vesca]	1.93443	0.0209252	0.0437452	yes	up
MSTRG.34767	PREDICTED: leucine-rich repeat extensin-like protein 4 isoform X2 [Pyrus x bretschneideri]	-1.15878	6.03483e-66	2.58047e-64	yes	down		MSTRG.11884	PREDICTED: auxin-induced protein 15A-like [Fragaria vesca subsp. vesca]	1.79466	9.82891e-17	8.70509e-16	yes	up
maker-Fvb4-3-augustus-gene-106.36	PREDICTED: glucose-6-phosphate 1-dehydrogenase, chloroplastic [Fragaria vesca subsp. vesca]	-1.34138	4.25102e-17	3.84683e-16	yes	down		maker-Fvb6-1-snap-gene-48.71	phosphoglycerate kinase 3, cytosolic [Prunus avium]	1.16261	3.54829e-23	4.30891e-22	yes	up
maker-Fvb4-3-augustus-gene-299.36	ethylene receptor [Fragaria x ananassa]	-1.40588	2.91148e-58	1.06307e-56	yes	down		maker-Fvb5-1-snap-gene-209.65	PREDICTED: protein SMG7-like [Fragaria vesca subsp. vesca]	1.0475	6.64741e-32	1.15511e-30	yes	up
maker-Fvb6-1-snap-gene-241.46	PREDICTED: UDP-glycosyltransferase 73D1 [Fragaria vesca subsp. vesca]	-2.62213	2.16985e-06	8.60049e-06	yes	down		snap_masked-Fvb2-3-processed-gene-76.34	PREDICTED: uncharacterized protein LOC105349822 [Fragaria vesca subsp. vesca]	3.23843	2.87836e-14	2.1961e-13	yes	up
maker-Fvb5-3-augustus-gene-259.47	PREDICTED: uncharacterized protein At1g76660-like [Fragaria vesca subsp. vesca]	-1.10453	1.40554e-05	5.05637e-05	yes	down		MSTRG.61806	PREDICTED: RING-H2 zinc finger protein RHA1a [Fragaria vesca subsp. vesca]	1.39291	1.42917e-07	6.41125e-07	yes	up
augustus_masked-Fvb4-3-processed-gene-104.1	PREDICTED: glucuronoxylan 4-O-methyltransferase 1 isoform X1 [Fragaria vesca subsp. vesca]	-1.09108	2.23588e-13	1.61304e-12	yes	down		MSTRG.55099	vegetative cell wall protein gp1-like [Rosa chinensis]	1.28927	7.314e-28	1.08712e-26	yes	up
augustus_masked-Fvb5-3-processed-gene-33.8	PREDICTED: protein TRANSPARENT TESTA 12-like isoform X1 [Fragaria vesca subsp. vesca]	-1.23801	3.21476e-53	1.03205e-51	yes	down		maker-Fvb2-3-augustus-gene-16.33	AUX1 [Fragaria x ananassa]	1.54582	6.70881e-36	1.31679e-34	yes	up
maker-Fvb7-4-augustus-gene-19.70	PREDICTED: probable WRKY transcription factor 27 [Fragaria vesca subsp. vesca]	-1.24161	0.0041064	0.0100369	yes	down		augustus_masked-Fvb4-4-processed-gene-169.3	PREDICTED: protein PHYTOCHROME KINASE SUBSTRATE 4 [Fragaria vesca subsp. vesca]	4.53292	0.0111215	0.0248218	yes	up
maker-Fvb7-3-snap-gene-162.40	PREDICTED: jacalin-related lectin 3-like [Fragaria vesca subsp. vesca]	-1.27789	1.1902e-09	6.47863e-09	yes	down		maker-Fvb6-2-augustus-gene-18.37	PREDICTED: probable complex I intermediate-associated protein 30 [Fragaria vesca subsp. vesca]	1.05028	4.77963e-08	2.25153e-07	yes	up
maker-Fvb4-1-augustus-gene-143.25	PREDICTED: heme-binding protein 2-like [Fragaria vesca subsp. vesca]	-1.54512	1.49699e-21	1.68962e-20	yes	down		maker-Fvb3-2-augustus-gene-264.42	mitochondrial uncoupling protein 2 isoform X2 [Prunus persica]	1.33529	1.00284e-26	1.41707e-25	yes	up
augustus_masked-Fvb6-4-processed-gene-107.2	pentatricopeptide repeat-containing protein At3g09650, chloroplastic [Rosa chinensis]	-2.87209	4.43665e-05	0.000149787	yes	down		maker-Fvb5-1-snap-gene-128.44	PREDICTED: putative nuclease HARBI1 [Fragaria vesca subsp. vesca]	2.62119	0.00412817	0.0100859	yes	up
maker-Fvb6-1-augustus-gene-161.37	PREDICTED: acetylornithine aminotransferase, mitochondrial [Fragaria vesca subsp. vesca]	-1.12262	0.000223068	0.000679547	yes	down		maker-Fvb7-2-augustus-gene-187.26	PREDICTED: uncharacterized protein LOC101307621 [Fragaria vesca subsp. vesca]	1.01649	8.17315e-14	6.06237e-13	yes	up
maker-Fvb1-3-augustus-gene-67.37	PREDICTED: CDK5RAP1-like protein [Fragaria vesca subsp. vesca]	-1.05664	8.1695e-24	1.01884e-22	yes	down		maker-Fvb2-2-snap-gene-144.19	hypothetical protein RchiOBHm_Chr1g0366961 [Rosa chinensis]	1.47261	0.00847668	0.0194102	yes	up
maker-Fvb7-4-augustus-gene-0.45	PREDICTED: LOW QUALITY PROTEIN: uncharacterized protein LOC101312488 [Fragaria vesca subsp. vesca]	-1.15012	4.2181e-83	2.52745e-81	yes	down		maker-Fvb6-2-augustus-gene-320.40	PREDICTED: uncharacterized protein LOC101293506 [Fragaria vesca subsp. vesca]	2.68262	2.22377e-264	1.18915e-261	yes	up
maker-Fvb1-3-snap-gene-103.67	PREDICTED: L-type lectin-domain containing receptor kinase IX.1-like [Fragaria vesca subsp. vesca]	-2.38875	0.000126551	0.000399795	yes	down		MSTRG.65091	PREDICTED: inactive protein RESTRICTED TEV MOVEMENT 2 [Fragaria vesca subsp. vesca]	1.85738	1.52476e-11	9.62009e-11	yes	up
maker-Fvb6-2-snap-gene-346.53	PREDICTED: SNF1-related protein kinase regulatory subunit beta-2-like [Fragaria vesca subsp. vesca]	-2.84036	2.36504e-95	1.7472e-93	yes	down		maker-Fvb3-1-augustus-gene-42.43	PREDICTED: mitogen-activated protein kinase kinase kinase ANP1-like [Fragaria vesca subsp. vesca]	2.37745	2.31867e-06	9.15956e-06	yes	up
maker-Fvb4-2-snap-gene-28.42	hypothetical protein RchiOBHm_Chr2g0161601 [Rosa chinensis]	-1.57505	6.45869e-05	0.000213424	yes	down		snap_masked-Fvb6-1-processed-gene-294.19	PREDICTED: F-box/LRR-repeat protein 20-like [Fragaria vesca subsp. vesca]	1.41695	1.71359e-10	9.98855e-10	yes	up
maker-Fvb6-4-augustus-gene-50.36	PREDICTED: ATP-dependent Clp protease proteolytic subunit-related protein 3, chloroplastic [Fragaria vesca subsp. vesca]	-1.50686	2.15159e-102	1.80396e-100	yes	down		MSTRG.45720	callose synthase 7 isoform X1 [Rosa chinensis]	2.47534	5.19353e-195	1.32321e-192	yes	up
maker-Fvb4-1-snap-gene-23.45	PREDICTED: probable inorganic phosphate transporter 1-3 [Fragaria vesca subsp. vesca]	-1.42629	3.57556e-65	1.50925e-63	yes	down		MSTRG.39822	PREDICTED: queuine tRNA-ribosyltransferase-like isoform X2 [Fragaria vesca subsp. vesca]	1.29257	4.39606e-20	4.61883e-19	yes	up
maker-Fvb4-2-snap-gene-104.33	PREDICTED: sodium/hydrogen exchanger 2-like [Fragaria vesca subsp. vesca]	-1.51758	3.39152e-20	3.58303e-19	yes	down		MSTRG.1982	PREDICTED: putative nuclease HARBI1 [Fragaria vesca subsp. vesca]	2.57291	8.39486e-31	1.40642e-29	yes	up
maker-Fvb6-4-augustus-gene-58.34	PREDICTED: polygalacturonase At1g48100-like [Fragaria vesca subsp. vesca]	-2.25904	9.50114e-05	0.000306258	yes	down		maker-Fvb6-2-snap-gene-325.85	PREDICTED: uncharacterized protein LOC101304600 [Fragaria vesca subsp. vesca]	2.24159	1.32783e-08	6.57313e-08	yes	up
augustus_masked-Fvb2-3-processed-gene-53.6	lachrymatory-factor synthase-like [Rosa chinensis]	-1.86504	7.00868e-06	2.61662e-05	yes	down		maker-Fvb7-4-snap-gene-219.17	PREDICTED: vicianin hydrolase-like [Fragaria vesca subsp. vesca]	2.40585	1.19289e-197	3.17102e-195	yes	up
MSTRG.21236	PREDICTED: P-loop NTPase domain-containing protein LPA1 homolog 2-like [Fragaria vesca subsp. vesca]	-1.38548	1.7452e-19	1.78351e-18	yes	down		MSTRG.21632	PREDICTED: uncharacterized protein LOC105353214 [Fragaria vesca subsp. vesca]	3.3469	0.00138156	0.00368822	yes	up
maker-Fvb2-3-augustus-gene-26.53	PREDICTED: serpin-ZX [Fragaria vesca subsp. vesca]	-1.00507	3.58329e-14	2.71637e-13	yes	down		maker-Fvb6-3-augustus-gene-417.61	PREDICTED: protein tesmin/TSO1-like CXC 2 [Fragaria vesca subsp. vesca]	1.30899	8.9068e-05	0.000288364	yes	up
maker-Fvb1-1-augustus-gene-199.57	PREDICTED: mitogen-activated protein kinase kinase kinase YODA-like [Fragaria vesca subsp. vesca]	-1.30921	0.00424353	0.0103361	yes	down		maker-Fvb5-4-augustus-gene-83.38	PREDICTED: protein REVEILLE 7-like isoform X1 [Fragaria vesca subsp. vesca]	3.06479	7.44153e-77	3.90663e-75	yes	up
maker-Fvb5-2-augustus-gene-35.81	PREDICTED: probable LRR receptor-like serine/threonine-protein kinase At4g26540 [Fragaria vesca subsp. vesca]	-1.74889	0.00595641	0.0140972	yes	down		maker-Fvb7-2-augustus-gene-79.32	PREDICTED: probable dolichyl pyrophosphate Glc1Man9GlcNAc2 alpha-1,3-glucosyltransferase [Fragaria vesca subsp. vesca]	1.07684	0.0041316	0.0100935	yes	up
maker-Fvb3-1-snap-gene-211.31	PREDICTED: transcription factor TCP4 [Fragaria vesca subsp. vesca]	-1.26345	2.44386e-49	7.09745e-48	yes	down		augustus_masked-Fvb7-4-processed-gene-128.1	PREDICTED: fasciclin-like arabinogalactan protein 10 [Fragaria vesca subsp. vesca]	1.58587	4.8441e-11	2.94553e-10	yes	up
augustus_masked-Fvb3-3-processed-gene-259.1	PREDICTED: uncharacterized protein At1g18480 isoform X1 [Fragaria vesca subsp. vesca]	-1.26072	4.80681e-34	8.88845e-33	yes	down		maker-Fvb4-2-snap-gene-20.52	G-type lectin S-receptor-like serine/threonine-protein kinase At1g34300 [Rosa chinensis]	1.33427	3.20829e-35	6.16947e-34	yes	up
maker-Fvb7-2-snap-gene-247.63	PREDICTED: uncharacterized protein LOC101308136 isoform X2 [Fragaria vesca subsp. vesca]	-1.15482	7.95797e-52	2.47028e-50	yes	down		maker-Fvb6-2-augustus-gene-290.45	PREDICTED: apoptosis-enhancing nuclease isoform X1 [Fragaria vesca subsp. vesca]	1.81505	0.0171458	0.0366226	yes	up
maker-Fvb5-3-augustus-gene-216.55	PREDICTED: transcription repressor MYB5-like [Fragaria vesca subsp. vesca]	-3.38768	2.09285e-07	9.23313e-07	yes	down		maker-Fvb4-1-augustus-gene-172.39	PREDICTED: cytochrome P450 704B1 [Fragaria vesca subsp. vesca]	3.03338	8.31474e-05	0.000270394	yes	up
MSTRG.42831	PREDICTED: uncharacterized protein LOC105351484 [Fragaria vesca subsp. vesca]	-1.48363	5.10835e-06	1.93839e-05	yes	down		maker-Fvb3-1-augustus-gene-257.21	PREDICTED: transcription factor JUNGBRUNNEN 1-like [Fragaria vesca subsp. vesca]	2.36437	9.88668e-08	4.51825e-07	yes	up
augustus_masked-Fvb1-3-processed-gene-95.10	PREDICTED: ADP-ribosylation factor 1-like [Fragaria vesca subsp. vesca]	-1.01507	2.19593e-14	1.6886e-13	yes	down		snap_masked-Fvb3-4-processed-gene-193.27	PREDICTED: ethylene-responsive transcription factor 4 [Fragaria vesca subsp. vesca]	1.8385	7.33665e-23	8.8082e-22	yes	up
augustus_masked-Fvb6-4-processed-gene-180.1	PREDICTED: uncharacterized protein LOC101304307 isoform X3 [Fragaria vesca subsp. vesca]	-1.70979	9.46524e-30	1.52305e-28	yes	down		maker-Fvb4-3-augustus-gene-223.34	PREDICTED: uncharacterized protein LOC105350684 [Fragaria vesca subsp. vesca]	2.38546	1.71776e-10	1.0009e-09	yes	up
maker-Fvb2-4-augustus-gene-258.73	uncharacterized protein LOC112170425 [Rosa chinensis]	-1.3983	1.32584e-43	3.31553e-42	yes	down		maker-Fvb3-2-snap-gene-37.103	PREDICTED: probable LRR receptor-like serine/threonine-protein kinase RFK1 [Fragaria vesca subsp. vesca]	1.22573	2.19583e-22	2.58233e-21	yes	up
augustus_masked-Fvb4-2-processed-gene-61.0	PREDICTED: ABC transporter B family member 26, chloroplastic [Fragaria vesca subsp. vesca]	-1.37194	5.09655e-09	2.63068e-08	yes	down		MSTRG.64930	PREDICTED: uncharacterized protein LOC101307926 [Fragaria vesca subsp. vesca]	1.20549	1.98007e-06	7.88256e-06	yes	up
maker-Fvb3-4-augustus-gene-198.36	PREDICTED: myb-like protein J [Fragaria vesca subsp. vesca]	-2.00346	1.21029e-39	2.67591e-38	yes	down		maker-Fvb6-2-snap-gene-265.37	PREDICTED: GDSL esterase/lipase At5g33370-like [Fragaria vesca subsp. vesca]	3.32433	1.44623e-23	1.78333e-22	yes	up
MSTRG.28711	PREDICTED: proline-rich receptor-like protein kinase PERK8 isoform X2 [Pyrus x bretschneideri]	-1.59683	1.11283e-79	6.18453e-78	yes	down		snap_masked-Fvb4-3-processed-gene-64.19	PREDICTED: putative lipid-transfer protein DIR1 [Fragaria vesca subsp. vesca]	1.34414	6.35079e-05	0.000210025	yes	up
maker-Fvb1-2-augustus-gene-45.64	PREDICTED: homeobox protein knotted-1-like 3 isoform X2 [Fragaria vesca subsp. vesca]	-1.14885	3.35912e-18	3.21196e-17	yes	down		maker-Fvb6-2-snap-gene-257.50	PREDICTED: LOW QUALITY PROTEIN: putative pentatricopeptide repeat-containing protein At1g12700, mitochondrial [Fragaria vesca subsp. vesca]	1.10426	0.00971196	0.0219524	yes	up
maker-Fvb6-2-augustus-gene-314.37	PREDICTED: uncharacterized protein LOC101310818 [Fragaria vesca subsp. vesca]	-1.36432	0.000249023	0.000753078	yes	down		maker-Fvb6-3-augustus-gene-52.49	PREDICTED: G-type lectin S-receptor-like serine/threonine-protein kinase At4g27290 [Fragaria vesca subsp. vesca]	1.33372	6.10631e-06	2.29501e-05	yes	up
augustus_masked-Fvb7-2-processed-gene-183.16	PREDICTED: dehydration-responsive protein RD22-like [Fragaria vesca subsp. vesca]	-1.10076	3.95027e-10	2.23712e-09	yes	down		maker-Fvb4-3-augustus-gene-99.52	PREDICTED: uncharacterized protein LOC101295883 [Fragaria vesca subsp. vesca]	1.3613	3.66789e-07	1.58376e-06	yes	up
snap_masked-Fvb3-2-processed-gene-57.21	dihydroceramide fatty acyl 2-hydroxylase FAH1-like isoform X3 [Rosa chinensis]	-3.09665	3.98724e-134	5.14348e-132	yes	down		maker-Fvb3-1-augustus-gene-248.31	PREDICTED: ribulose-1,5 bisphosphate carboxylase/oxygenase large subunit N-methyltransferase, chloroplastic isoform X3 [Fragaria vesca subsp. vesca]	1.54575	5.59103e-40	1.25272e-38	yes	up
maker-Fvb2-3-augustus-gene-3.32	PREDICTED: transcription factor TT2-like [Fragaria vesca subsp. vesca]	-1.54787	0.001399	0.00373175	yes	down		maker-Fvb6-3-snap-gene-176.41	PREDICTED: G-type lectin S-receptor-like serine/threonine-protein kinase At2g19130 [Fragaria vesca subsp. vesca]	1.09801	6.16986e-09	3.15564e-08	yes	up
MSTRG.45603	PREDICTED: trifunctional UDP-glucose 4,6-dehydratase/UDP-4-keto-6-deoxy-D-glucose 3,5-epimerase/UDP-4-keto-L-rhamnose-reductase RHM1-like [Fragaria vesca subsp. vesca]	-1.12562	5.99329e-41	1.38433e-39	yes	down		maker-Fvb4-1-snap-gene-171.72	PREDICTED: phosphate transporter PHO1 homolog 10 [Fragaria vesca subsp. vesca]	1.89586	0.00204562	0.00529353	yes	up
maker-Fvb5-1-augustus-gene-85.40	PREDICTED: alpha-1,4-glucan-protein synthase [UDP-forming] [Fragaria vesca subsp. vesca]	-1.03303	5.56485e-25	7.29418e-24	yes	down		augustus_masked-Fvb2-2-processed-gene-147.2	ATP-citrate synthase alpha chain protein 1 [Rosa chinensis]	1.58043	3.28198e-81	1.88311e-79	yes	up
MSTRG.16632	PREDICTED: SCP2 sterol-binding domain-containing protein 1-like [Fragaria vesca subsp. vesca]	-1.00744	0.00385533	0.00947008	yes	down		augustus_masked-Fvb3-3-processed-gene-0.10	G-type lectin S-receptor-like serine/threonine-protein kinase RKS1 isoform X1 [Rosa chinensis]	1.22244	0.00100913	0.00275918	yes	up
maker-Fvb1-2-augustus-gene-18.50	PREDICTED: peroxiredoxin-2B [Fragaria vesca subsp. vesca]	-1.40765	1.42039e-68	6.41343e-67	yes	down		MSTRG.26082	PREDICTED: probable leucine-rich repeat receptor-like serine/threonine-protein kinase At3g14840 [Fragaria vesca subsp. vesca]	1.3944	9.92706e-81	5.60498e-79	yes	up
maker-Fvb6-2-snap-gene-235.48	PREDICTED: uncharacterized protein LOC101307509 [Fragaria vesca subsp. vesca]	-2.09333	9.79086e-23	1.16982e-21	yes	down		maker-Fvb5-1-augustus-gene-100.38	PREDICTED: WD-40 repeat-containing protein MSI4 [Fragaria vesca subsp. vesca]	1.22562	0.00219881	0.00566126	yes	up
snap_masked-Fvb7-3-processed-gene-235.16	PREDICTED: pyruvate kinase, cytosolic isozyme-like [Fragaria vesca subsp. vesca]	-1.39506	6.90918e-09	3.52086e-08	yes	down		maker-Fvb3-3-snap-gene-39.77	PREDICTED: wall-associated receptor kinase 2-like, partial [Fragaria vesca subsp. vesca]	1.56189	1.82434e-06	7.2793e-06	yes	up
maker-Fvb5-4-augustus-gene-248.40	PREDICTED: protein HOMOLOG OF MAMMALIAN LYST-INTERACTING PROTEIN 5 [Fragaria vesca subsp. vesca]	-1.07049	1.55628e-09	8.39236e-09	yes	down		augustus_masked-Fvb3-2-processed-gene-5.4	PREDICTED: pathogenesis-related protein PR-4-like [Fragaria vesca subsp. vesca]	1.12881	0.000122693	0.00038861	yes	up
maker-Fvb6-1-augustus-gene-230.35	PREDICTED: protein trichome birefringence-like 8 [Fragaria vesca subsp. vesca]	-2.82512	3.83654e-09	2.0021e-08	yes	down		maker-Fvb1-4-snap-gene-169.24	PREDICTED: galactinol synthase 2-like [Fragaria vesca subsp. vesca]	1.05132	6.84607e-09	3.49063e-08	yes	up
maker-Fvb4-3-augustus-gene-316.32	PREDICTED: probable serine/threonine-protein kinase abkC [Fragaria vesca subsp. vesca]	-1.39952	1.6492e-43	4.10965e-42	yes	down		augustus_masked-Fvb6-2-processed-gene-115.6	PREDICTED: uncharacterized protein LOC101299504 [Fragaria vesca subsp. vesca]	1.11767	0.00462239	0.0111758	yes	up
maker-Fvb6-3-snap-gene-48.62	PREDICTED: uncharacterized protein LOC101308695 [Fragaria vesca subsp. vesca]	-1.68187	4.83493e-63	1.96943e-61	yes	down		maker-Fvb1-1-augustus-gene-260.42	PREDICTED: equilibrative nucleotide transporter 8 [Fragaria vesca subsp. vesca]	1.40516	7.32579e-29	1.13434e-27	yes	up
maker-Fvb3-1-augustus-gene-48.29	PREDICTED: cytochrome P450 86A1 [Fragaria vesca subsp. vesca]	-2.95082	0.00280716	0.00709076	yes	down		MSTRG.52559	PREDICTED: G-type lectin S-receptor-like serine/threonine-protein kinase CES101 [Fragaria vesca subsp. vesca]	2.02949	4.98021e-61	1.94258e-59	yes	up
maker-Fvb4-4-augustus-gene-105.50	PREDICTED: sugar transporter ERD6-like 16 isoform X1 [Fragaria vesca subsp. vesca]	-4.0743	0.0110684	0.0247135	yes	down		augustus_masked-Fvb5-1-processed-gene-268.5	PREDICTED: mitochondrial uncoupling protein 4 [Fragaria vesca subsp. vesca]	1.73477	4.46945e-35	8.54641e-34	yes	up
maker-Fvb1-1-snap-gene-106.27	PREDICTED: WAT1-related protein At5g64700 [Fragaria vesca subsp. vesca]	-2.30307	1.75504e-05	6.24477e-05	yes	down		maker-Fvb7-4-augustus-gene-79.30	PREDICTED: serine carboxypeptidase-like 27 [Fragaria vesca subsp. vesca]	1.13985	2.45784e-81	1.4191e-79	yes	up
maker-Fvb5-1-augustus-gene-71.60	PREDICTED: uncharacterized protein LOC101303763 [Fragaria vesca subsp. vesca]	-1.60096	3.85406e-12	2.54199e-11	yes	down		maker-Fvb4-2-augustus-gene-10.52	PREDICTED: formin-like protein 8 [Fragaria vesca subsp. vesca]	2.68636	8.22181e-20	8.51874e-19	yes	up
maker-Fvb6-2-snap-gene-82.34	PREDICTED: uncharacterized protein LOC101303722 isoform X1 [Fragaria vesca subsp. vesca]	-1.14489	3.05167e-13	2.17903e-12	yes	down		maker-Fvb6-1-snap-gene-298.73	PREDICTED: bifunctional epoxide hydrolase 2-like [Fragaria vesca subsp. vesca]	2.50546	3.28622e-05	0.000112791	yes	up
MSTRG.56303	PREDICTED: uncharacterized protein LOC101304307 isoform X3 [Fragaria vesca subsp. vesca]	-1.70979	9.46524e-30	1.52305e-28	yes	down		snap_masked-Fvb7-4-processed-gene-73.29	PREDICTED: putative serine/threonine-protein kinase [Fragaria vesca subsp. vesca]	3.00039	1.45386e-05	5.22241e-05	yes	up
maker-Fvb7-3-augustus-gene-162.28	PREDICTED: protein ECERIFERUM 1-like [Fragaria vesca subsp. vesca]	-2.06504	9.84163e-37	1.9947e-35	yes	down		maker-Fvb7-2-snap-gene-129.53	cytochrome P450 CYP82D47-like [Rosa chinensis]	1.41699	7.58376e-05	0.000248	yes	up
MSTRG.40339	PREDICTED: protein TRANSPARENT TESTA 12-like [Fragaria vesca subsp. vesca]	-3.42115	2.10905e-10	1.2204e-09	yes	down		augustus_masked-Fvb2-3-processed-gene-92.7	PREDICTED: RING-H2 finger protein ATL54-like [Fragaria vesca subsp. vesca]	1.86674	1.60416e-11	1.00995e-10	yes	up
MSTRG.50894	PREDICTED: uncharacterized protein LOC101311207 [Fragaria vesca subsp. vesca]	-1.83096	1.8583e-09	9.94409e-09	yes	down		MSTRG.9133	PREDICTED: uncharacterized protein LOC101301347 [Fragaria vesca subsp. vesca]	1.14935	1.12778e-19	1.16301e-18	yes	up
maker-Fvb2-4-augustus-gene-204.74	PREDICTED: adenine phosphoribosyltransferase 5-like [Fragaria vesca subsp. vesca]	-1.20635	1.85625e-17	1.71056e-16	yes	down		maker-Fvb3-2-snap-gene-7.55	uncharacterized protein LOC112167224 isoform X1 [Rosa chinensis]	1.27333	3.28444e-18	3.14153e-17	yes	up
maker-Fvb2-2-augustus-gene-38.42	PREDICTED: esterase-like [Fragaria vesca subsp. vesca]	-1.44638	1.10999e-138	1.49915e-136	yes	down		maker-Fvb6-3-snap-gene-79.33	peptidyl-prolyl cis-trans isomerase [Rosa chinensis]	1.89173	0.00102252	0.00279347	yes	up
maker-Fvb1-3-snap-gene-73.70	PREDICTED: uncharacterized protein LOC101313160 [Fragaria vesca subsp. vesca]	-1.93792	6.05635e-146	9.07229e-144	yes	down		MSTRG.40408	hypothetical protein [Rosa rugosa]	1.93571	0.000439407	0.00127814	yes	up
augustus_masked-Fvb2-1-processed-gene-60.1	uncharacterized protein LOC112198492 [Rosa chinensis]	-1.13158	9.24344e-37	1.87552e-35	yes	down		maker-Fvb2-4-augustus-gene-41.39	PREDICTED: CDPK-related kinase 5-like [Fragaria vesca subsp. vesca]	1.39447	8.58691e-37	1.74424e-35	yes	up
augustus_masked-Fvb2-2-processed-gene-11.6	PREDICTED: vacuolar-processing enzyme [Fragaria vesca subsp. vesca]	-1.11751	2.0608e-70	9.69041e-69	yes	down		MSTRG.36025	PREDICTED: thioredoxin-like 1-2, chloroplastic [Fragaria vesca subsp. vesca]	1.90221	5.10612e-25	6.70149e-24	yes	up
maker-Fvb5-1-augustus-gene-130.60	PREDICTED: beta-amylase 3, chloroplastic [Fragaria vesca subsp. vesca]	-7.09191	0	0	yes	down		maker-Fvb1-1-snap-gene-251.57	PREDICTED: leucine-rich repeat extensin-like protein 4 [Fragaria vesca subsp. vesca]	1.22835	0.00686777	0.0160477	yes	up
maker-Fvb7-2-snap-gene-85.61	PREDICTED: peptidyl-prolyl cis-trans isomerase FKBP20-2, chloroplastic [Fragaria vesca subsp. vesca]	-1.47753	1.96704e-23	2.41323e-22	yes	down		maker-Fvb7-2-augustus-gene-7.51	PREDICTED: protein gamma response 1 [Fragaria vesca subsp. vesca]	1.09197	6.69712e-15	5.32067e-14	yes	up
maker-Fvb6-1-augustus-gene-110.61	PREDICTED: uncharacterized protein LOC101293611 [Fragaria vesca subsp. vesca]	-1.06173	2.22382e-42	5.35862e-41	yes	down		MSTRG.31783	PREDICTED: major allergen Pru ar 1-like [Fragaria vesca subsp. vesca]	4.81539	3.55525e-28	5.34921e-27	yes	up
augustus_masked-Fvb7-4-processed-gene-82.5	hypothetical protein RchiOBHm_Chr1g0362851 [Rosa chinensis]	-3.32969	0.00335473	0.00834563	yes	down		snap_masked-Fvb3-2-processed-gene-124.17	PREDICTED: myosin-2 [Fragaria vesca subsp. vesca]	1.86942	2.21877e-242	1.00036e-239	yes	up
maker-Fvb2-3-augustus-gene-52.50	PREDICTED: probable lactoylglutathione lyase, chloroplast [Fragaria vesca subsp. vesca]	-1.56157	7.76383e-27	1.1042e-25	yes	down		maker-Fvb1-2-snap-gene-178.28	PREDICTED: laccase-15-like isoform X2 [Fragaria vesca subsp. vesca]	2.50348	1.42794e-12	9.71852e-12	yes	up
maker-Fvb1-2-snap-gene-32.79	PREDICTED: heat stress transcription factor C-1 [Fragaria vesca subsp. vesca]	-2.77054	2.29687e-109	2.1623e-107	yes	down		maker-Fvb5-3-augustus-gene-238.71	PREDICTED: probable pectate lyase 18 [Fragaria vesca subsp. vesca]	1.08894	5.81771e-39	1.25933e-37	yes	up
maker-Fvb6-1-snap-gene-82.66	PREDICTED: putative UDP-glucose flavonoid 3-O-glucosyltransferase 3 [Fragaria vesca subsp. vesca]	-1.23707	2.66383e-06	1.04508e-05	yes	down		augustus_masked-Fvb7-2-processed-gene-272.12	PREDICTED: dehydration-responsive element-binding protein 1B-like [Fragaria vesca subsp. vesca]	4.70537	6.68876e-07	2.8048e-06	yes	up
augustus_masked-Fvb6-2-processed-gene-308.4	UDP-glycosyltransferase 708C1-like [Rosa chinensis]	-1.79187	0.00113869	0.0030857	yes	down		snap_masked-Fvb7-2-processed-gene-264.36	PREDICTED: structural maintenance of chromosomes protein 2-1-like [Fragaria vesca subsp. vesca]	1.15755	1.13292e-08	5.65144e-08	yes	up
maker-Fvb4-2-snap-gene-128.35	PREDICTED: myb family transcription factor APL isoform X1 [Fragaria vesca subsp. vesca]	-1.69132	3.45729e-26	4.78897e-25	yes	down		maker-Fvb4-2-snap-gene-2.71	PREDICTED: uncharacterized protein LOC101314078 [Fragaria vesca subsp. vesca]	1.47059	2.47705e-13	1.78159e-12	yes	up
augustus_masked-Fvb3-3-processed-gene-174.2	PREDICTED: protein TIC 20-v, chloroplastic [Fragaria vesca subsp. vesca]	-2.15672	2.60535e-55	8.85548e-54	yes	down		maker-Fvb6-1-snap-gene-100.62	PREDICTED: vacuolar-processing enzyme-like [Fragaria vesca subsp. vesca]	2.28207	0.000937493	0.00257837	yes	up
maker-Fvb2-1-snap-gene-125.35	PREDICTED: E3 ubiquitin-protein ligase PRT1 [Fragaria vesca subsp. vesca]	-1.16089	1.19312e-08	5.93982e-08	yes	down		maker-Fvb5-2-augustus-gene-163.21	jmjC domain-containing protein 7 isoform X2 [Rosa chinensis]	1.01131	1.12263e-12	7.69523e-12	yes	up
maker-Fvb7-2-augustus-gene-61.33	PREDICTED: transcription factor bHLH91-like [Fragaria vesca subsp. vesca]	-1.83451	0.0194798	0.0410435	yes	down		MSTRG.15753	PREDICTED: desumoylating isopeptidase 1-like [Fragaria vesca subsp. vesca]	1.06077	4.68017e-36	9.23741e-35	yes	up
maker-Fvb1-4-augustus-gene-39.52	PREDICTED: protein trichome birefringence-like 16 [Fragaria vesca subsp. vesca]	-1.14076	9.05758e-15	7.13681e-14	yes	down		maker-Fvb6-4-snap-gene-295.56	PREDICTED: 7-deoxyloganetin glucosyltransferase-like [Fragaria vesca subsp. vesca]	1.09888	1.37049e-07	6.16272e-07	yes	up
maker-Fvb4-1-augustus-gene-2.21	PREDICTED: uncharacterized aarF domain-containing protein kinase At1g71810, chloroplastic [Fragaria vesca subsp. vesca]	-2.32989	1.20022e-275	7.50959e-273	yes	down		MSTRG.28268	PREDICTED: probable xyloglucan endotransglucosylase/hydrolase protein 33 [Fragaria vesca subsp. vesca]	3.65806	8.80778e-187	2.0561e-184	yes	up
MSTRG.61475	hypothetical protein RchiOBHm_Chr1g0362761 [Rosa chinensis]	-4.25635	0.004108	0.0100406	yes	down		augustus_masked-Fvb6-3-processed-gene-370.3	PREDICTED: pleiotropic drug resistance protein 3-like isoform X2 [Fragaria vesca subsp. vesca]	2.51875	1.60998e-190	3.94878e-188	yes	up
maker-Fvb4-4-augustus-gene-89.29	PREDICTED: galactinol synthase 2-like [Fragaria vesca subsp. vesca]	-2.95279	1.79062e-05	6.36499e-05	yes	down		augustus_masked-Fvb5-3-processed-gene-259.12	PREDICTED: BTB/POZ domain-containing protein At5g41330 [Fragaria vesca subsp. vesca]	2.20449	3.26372e-19	3.28968e-18	yes	up
maker-Fvb6-1-snap-gene-273.69	PREDICTED: L-type lectin-domain containing receptor kinase S.4-like [Fragaria vesca subsp. vesca]	-1.00677	4.44612e-18	4.21801e-17	yes	down		maker-Fvb3-1-augustus-gene-39.29	PREDICTED: cinnamoyl-CoA reductase 1 [Fragaria vesca subsp. vesca]	1.17981	1.72955e-06	6.9173e-06	yes	up
snap_masked-Fvb2-1-processed-gene-259.48	PREDICTED: type I inositol 1,4,5-trisphosphate 5-phosphatase 11 [Fragaria vesca subsp. vesca]	-1.30117	0.00177141	0.00463717	yes	down		augustus_masked-Fvb4-2-processed-gene-65.7	PREDICTED: vinorine synthase-like [Fragaria vesca subsp. vesca]	2.08283	1.08107e-25	1.46353e-24	yes	up
maker-Fvb4-1-snap-gene-166.70	PREDICTED: fructokinase-like 2, chloroplastic [Fragaria vesca subsp. vesca]	-1.15463	1.31643e-13	9.6401e-13	yes	down		augustus_masked-Fvb3-2-processed-gene-39.8	precursor of CEP14 [Rosa chinensis]	2.43887	5.95337e-07	2.5097e-06	yes	up
snap_masked-Fvb4-3-processed-gene-25.21	PREDICTED: probable sulfate transporter 3.3 [Fragaria vesca subsp. vesca]	-1.90121	3.95108e-101	3.23601e-99	yes	down		maker-Fvb2-1-snap-gene-233.59	PREDICTED: myosin heavy chain kinase B-like [Fragaria vesca subsp. vesca]	6.13013	2.55815e-172	5.32327e-170	yes	up
maker-Fvb2-2-augustus-gene-82.29	PREDICTED: protein SULFUR DEFICIENCY-INDUCED 1 [Fragaria vesca subsp. vesca]	-1.50965	5.49136e-09	2.82353e-08	yes	down		maker-Fvb6-2-snap-gene-194.51	PREDICTED: uncharacterized protein LOC101294772 [Fragaria vesca subsp. vesca]	2.42951	3.59778e-152	5.84646e-150	yes	up
maker-Fvb2-1-snap-gene-225.59	PREDICTED: protein DCL, chloroplastic [Fragaria vesca subsp. vesca]	-1.21377	8.63946e-40	1.9217e-38	yes	down		MSTRG.11518	PREDICTED: serine carboxypeptidase-like 17 [Fragaria vesca subsp. vesca]	1.48092	1.48264e-24	1.90724e-23	yes	up
augustus_masked-Fvb2-4-processed-gene-23.9	PREDICTED: pentatricopeptide repeat-containing protein At5g02860 [Fragaria vesca subsp. vesca]	-1.09221	3.21877e-23	3.91755e-22	yes	down		maker-Fvb1-3-snap-gene-59.54	PREDICTED: LOW QUALITY PROTEIN: DNA-directed RNA polymerase II subunit 1 [Fragaria vesca subsp. vesca]	1.64048	0.0171381	0.0366095	yes	up
maker-Fvb5-1-augustus-gene-150.21	PREDICTED: alpha/beta hydrolase domain-containing protein 17B [Fragaria vesca subsp. vesca]	-1.55756	0.0239292	0.0491933	yes	down		maker-Fvb1-1-augustus-gene-173.36	PREDICTED: putative pentatricopeptide repeat-containing protein At5g65820 [Fragaria vesca subsp. vesca]	1.06917	1.35082e-08	6.68441e-08	yes	up
maker-Fvb5-1-augustus-gene-91.55	PREDICTED: NAC domain-containing protein 100 [Fragaria vesca subsp. vesca]	-1.5291	0.00295797	0.0074338	yes	down		maker-Fvb2-1-snap-gene-222.61	PREDICTED: uncharacterized protein LOC105350583 isoform X1 [Fragaria vesca subsp. vesca]	1.08531	0.0133217	0.0291871	yes	up
MSTRG.57302	PREDICTED: probable disease resistance protein At5g66900 isoform X1 [Fragaria vesca subsp. vesca]	-2.35971	0.00820547	0.0188578	yes	down		maker-Fvb4-2-snap-gene-54.42	PREDICTED: G-type lectin S-receptor-like serine/threonine-protein kinase RLK1 [Fragaria vesca subsp. vesca]	1.04681	2.91608e-06	1.14044e-05	yes	up
snap_masked-Fvb3-3-processed-gene-35.36	PREDICTED: protein kinase PINOID [Fragaria vesca subsp. vesca]	-3.93467	0.016331	0.0350563	yes	down		maker-Fvb4-3-snap-gene-180.43	PREDICTED: pyruvate, phosphate dikinase 2 [Fragaria vesca subsp. vesca]	1.04566	1.27702e-56	4.47959e-55	yes	up
maker-Fvb2-3-augustus-gene-68.62	PREDICTED: vacuolar-processing enzyme [Fragaria vesca subsp. vesca]	-1.22823	1.29733e-61	5.11237e-60	yes	down		snap_masked-Fvb3-1-processed-gene-233.14	PREDICTED: probable potassium transporter 13 isoform X1 [Fragaria vesca subsp. vesca]	1.04959	3.13068e-31	5.31072e-30	yes	up
maker-Fvb6-4-augustus-gene-68.42	PREDICTED: uncharacterized protein LOC101315446 isoform X1 [Fragaria vesca subsp. vesca]	-1.44667	3.40006e-79	1.87148e-77	yes	down		MSTRG.46660	tyrosine--tRNA ligase 1, cytoplasmic-like isoform X1 [Rosa chinensis]	2.18304	0.0146662	0.0318244	yes	up
augustus_masked-Fvb2-4-processed-gene-113.6	60S ribosomal protein L18-2-like [Rosa chinensis]	-1.38824	0.000165231	0.000512816	yes	down		maker-Fvb4-3-augustus-gene-60.41	PREDICTED: uncharacterized protein LOC101307112 isoform X3 [Fragaria vesca subsp. vesca]	1.51915	3.52783e-09	1.84686e-08	yes	up
augustus_masked-Fvb5-4-processed-gene-195.5	PREDICTED: multiple C2 and transmembrane domain-containing protein 2 [Fragaria vesca subsp. vesca]	-2.41994	0.00424829	0.0103466	yes	down		snap_masked-Fvb4-2-processed-gene-91.17	PREDICTED: RING-H2 finger protein ATL2 [Fragaria vesca subsp. vesca]	3.11162	4.6064e-07	1.96575e-06	yes	up
maker-Fvb1-3-augustus-gene-263.29	PREDICTED: photosynthetic NDH subunit of subcomplex B 2, chloroplastic [Fragaria vesca subsp. vesca]	-1.0126	1.6639e-24	2.13414e-23	yes	down		MSTRG.40861	PREDICTED: oxysterol-binding protein-related protein 3B [Fragaria vesca subsp. vesca]	1.38671	3.54289e-14	2.68662e-13	yes	up
MSTRG.3853	--	-1.21546	1.2547e-08	6.23123e-08	yes	down		augustus_masked-Fvb6-2-processed-gene-23.4	PREDICTED: auxin-binding protein ABP19a [Fragaria vesca subsp. vesca]	1.06235	7.94979e-22	9.09327e-21	yes	up
MSTRG.14119	PREDICTED: uncharacterized protein LOC105349701 [Fragaria vesca subsp. vesca]	-2.50813	4.45761e-15	3.58104e-14	yes	down		augustus_masked-Fvb5-2-processed-gene-23.12	PREDICTED: uncharacterized protein LOC105351806 [Fragaria vesca subsp. vesca]	3.90946	3.23564e-08	1.54791e-07	yes	up
maker-Fvb2-1-augustus-gene-152.40	PREDICTED: F-box protein SKIP17-like [Fragaria vesca subsp. vesca]	-1.01957	1.46625e-21	1.65655e-20	yes	down		maker-Fvb5-4-augustus-gene-60.43	PREDICTED: transcription factor MYB108-like [Fragaria vesca subsp. vesca]	1.46799	0.00139834	0.00373032	yes	up
maker-Fvb7-1-snap-gene-246.50	RecName: Full=Chalcone--flavonone isomerase 2; Short=Chalcone isomerase 2	-3.12406	1.92692e-191	4.76427e-189	yes	down		MSTRG.18207	PREDICTED: splicing factor, suppressor of white-apricot homolog isoform X1 [Fragaria vesca subsp. vesca]	1.148	2.46591e-26	3.42917e-25	yes	up
maker-Fvb2-1-augustus-gene-74.29	PREDICTED: uncharacterized protein LOC101309208 [Fragaria vesca subsp. vesca]	-1.00442	8.92001e-08	4.09599e-07	yes	down		MSTRG.21440	PREDICTED: DNA-directed RNA polymerase III subunit RPC8 [Fragaria vesca subsp. vesca]	2.11648	5.02256e-25	6.59559e-24	yes	up
maker-Fvb7-1-augustus-gene-157.45	PREDICTED: B3 domain-containing protein REM9-like [Fragaria vesca subsp. vesca]	-2.53995	3.10259e-28	4.67809e-27	yes	down		snap_masked-Fvb6-2-processed-gene-280.32	putative calcium-binding protein CML19 [Rosa chinensis]	4.46135	0.00090677	0.00250086	yes	up
maker-Fvb7-3-augustus-gene-73.38	PREDICTED: heat shock cognate 70 kDa protein 2-like [Fragaria vesca subsp. vesca]	-1.90123	5.13272e-05	0.000171805	yes	down		augustus_masked-Fvb6-4-processed-gene-125.1	PREDICTED: uncharacterized protein LOC101308886 [Fragaria vesca subsp. vesca]	2.09739	0.0218108	0.0453636	yes	up
MSTRG.48770	PREDICTED: uncharacterized protein LOC101303722 isoform X1 [Fragaria vesca subsp. vesca]	-1.14489	3.05167e-13	2.17903e-12	yes	down		augustus_masked-Fvb4-1-processed-gene-157.4	PREDICTED: nudix hydrolase 1-like [Fragaria vesca subsp. vesca]	3.8599	0.00505235	0.0121156	yes	up
augustus_masked-Fvb6-2-processed-gene-200.3	PREDICTED: uncharacterized protein LOC101303240 [Fragaria vesca subsp. vesca]	-1.22252	1.61875e-08	7.95503e-08	yes	down		augustus_masked-Fvb5-1-processed-gene-276.3	PREDICTED: uncharacterized protein LOC105351563 [Fragaria vesca subsp. vesca]	2.93115	9.77876e-21	1.06276e-19	yes	up
maker-Fvb6-2-augustus-gene-245.54	PREDICTED: uncharacterized protein LOC101311710 [Fragaria vesca subsp. vesca]	-1.06266	0.00138122	0.00368743	yes	down		MSTRG.3421	PREDICTED: cyclin-SDS [Fragaria vesca subsp. vesca]	1.10855	1.274e-18	1.24634e-17	yes	up
maker-Fvb5-2-augustus-gene-38.51	PREDICTED: quinolinate synthase, chloroplastic [Fragaria vesca subsp. vesca]	-1.24551	1.22289e-07	5.53064e-07	yes	down		maker-Fvb1-2-augustus-gene-69.52	PREDICTED: uncharacterized transporter YBR287W isoform X2 [Fragaria vesca subsp. vesca]	1.242	3.97262e-37	8.13052e-36	yes	up
snap_masked-Fvb3-4-processed-gene-221.31	PREDICTED: patellin-5-like [Fragaria vesca subsp. vesca]	-2.29064	3.2604e-18	3.11951e-17	yes	down		maker-Fvb2-4-augustus-gene-91.30	PREDICTED: cytochrome P450 71A4-like [Fragaria vesca subsp. vesca]	1.19431	9.22466e-06	3.39651e-05	yes	up
maker-Fvb5-3-augustus-gene-271.40	PREDICTED: legumain [Fragaria vesca subsp. vesca]	-1.68744	4.2625e-141	5.98546e-139	yes	down		maker-Fvb6-2-augustus-gene-56.36	PREDICTED: uncharacterized protein LOC101313430 [Fragaria vesca subsp. vesca]	2.35029	8.55933e-07	3.54315e-06	yes	up
maker-Fvb7-2-augustus-gene-60.41	PREDICTED: SEC12-like protein 1 [Fragaria vesca subsp. vesca]	-1.09802	3.17699e-16	2.72861e-15	yes	down		maker-Fvb6-3-augustus-gene-243.35	PREDICTED: UPF0554 protein C2orf43 homolog isoform X1 [Fragaria vesca subsp. vesca]	1.03312	0.00066461	0.00187383	yes	up
maker-Fvb2-4-snap-gene-216.83	PREDICTED: uncharacterized protein LOC101304940 [Fragaria vesca subsp. vesca]	-1.48826	1.56968e-07	7.00976e-07	yes	down		maker-Fvb6-3-augustus-gene-126.44	PREDICTED: uncharacterized protein LOC101301403 [Fragaria vesca subsp. vesca]	1.53393	5.11487e-29	7.96959e-28	yes	up
maker-Fvb4-3-augustus-gene-96.58	PREDICTED: ALBINO3-like protein 1, chloroplastic [Fragaria vesca subsp. vesca]	-1.40728	1.62834e-74	8.14842e-73	yes	down		maker-Fvb5-1-snap-gene-111.55	PREDICTED: uncharacterized protein LOC105353350 [Fragaria vesca subsp. vesca]	1.98226	1.852e-05	6.57224e-05	yes	up
maker-Fvb3-2-augustus-gene-301.38	PREDICTED: uncharacterized protein LOC101311657 isoform X1 [Fragaria vesca subsp. vesca]	-1.05336	5.02104e-35	9.56733e-34	yes	down		augustus_masked-Fvb6-2-processed-gene-18.6	PREDICTED: adrenodoxin-like protein 1, mitochondrial isoform X2 [Fragaria vesca subsp. vesca]	2.26669	0.000164129	0.000509481	yes	up
maker-Fvb7-2-snap-gene-150.25	PREDICTED: receptor-like protein 12 [Fragaria vesca subsp. vesca]	-1.40559	1.75574e-20	1.88321e-19	yes	down		MSTRG.8264	uncharacterized protein LOC112172658 isoform X1 [Rosa chinensis]	1.91083	1.07044e-29	1.71914e-28	yes	up
maker-Fvb2-4-snap-gene-228.62	PREDICTED: serine carboxypeptidase-like 7 isoform X1 [Fragaria vesca subsp. vesca]	-2.40785	5.67926e-132	7.08759e-130	yes	down		maker-Fvb2-2-snap-gene-226.51	PREDICTED: exosome complex exonuclease dis3-like [Fragaria vesca subsp. vesca]	1.02863	0.0128664	0.028292	yes	up
maker-Fvb5-1-augustus-gene-73.42	PREDICTED: oligopeptide transporter 7 [Fragaria vesca subsp. vesca]	-1.6051	3.49324e-24	4.4225e-23	yes	down		augustus_masked-Fvb5-3-processed-gene-179.8	PREDICTED: mitogen-activated protein kinase kinase 9-like [Fragaria vesca subsp. vesca]	2.31158	1.64749e-48	4.69713e-47	yes	up
maker-Fvb3-4-augustus-gene-80.33	PREDICTED: LOB domain-containing protein 1-like [Fragaria vesca subsp. vesca]	-1.11056	0.000106855	0.000341549	yes	down		maker-Fvb4-1-augustus-gene-115.29	PREDICTED: uncharacterized protein LOC101310110 [Fragaria vesca subsp. vesca]	3.21111	1.38975e-13	1.016e-12	yes	up
snap_masked-Fvb2-1-processed-gene-233.39	PREDICTED: bark storage protein A-like [Fragaria vesca subsp. vesca]	-2.42238	0.00621169	0.0146378	yes	down		snap_masked-Fvb6-4-processed-gene-281.29	PREDICTED: U1 small nuclear ribonucleoprotein A [Fragaria vesca subsp. vesca]	1.0706	4.78429e-17	4.31243e-16	yes	up
maker-Fvb1-2-augustus-gene-5.47	PREDICTED: thiol protease aleurain-like [Fragaria vesca subsp. vesca]	-1.65751	6.283e-209	1.87018e-206	yes	down		maker-Fvb6-1-augustus-gene-110.47	PREDICTED: pectinesterase-like [Fragaria vesca subsp. vesca]	1.56377	2.93627e-11	1.81314e-10	yes	up
maker-Fvb6-3-augustus-gene-378.43	PREDICTED: ATP-dependent Clp protease proteolytic subunit-related protein 3, chloroplastic [Fragaria vesca subsp. vesca]	-1.07783	1.65438e-29	2.6431e-28	yes	down		maker-Fvb1-1-augustus-gene-230.35	PREDICTED: putative pectinesterase/pectinesterase inhibitor 45 [Fragaria vesca subsp. vesca]	1.00274	7.00293e-14	5.21793e-13	yes	up
maker-Fvb6-4-snap-gene-181.40	PREDICTED: protein CHLOROPLAST IMPORT APPARATUS 2-like isoform X1 [Fragaria vesca subsp. vesca]	-1.67995	5.02351e-67	2.20125e-65	yes	down		maker-Fvb6-3-snap-gene-383.87	alpha-galactosidase-like [Rosa chinensis]	1.10287	2.63612e-05	9.17159e-05	yes	up
maker-Fvb5-4-augustus-gene-50.50	PREDICTED: probable aquaporin NIP5-1 isoform X1 [Fragaria vesca subsp. vesca]	-1.57662	1.80212e-22	2.12966e-21	yes	down		augustus_masked-Fvb6-3-processed-gene-113.9	PREDICTED: auxin-binding protein ABP19a [Fragaria vesca subsp. vesca]	1.60974	1.12767e-114	1.12249e-112	yes	up
augustus_masked-Fvb6-4-processed-gene-37.9	PREDICTED: cation/calcium exchanger 2 [Fragaria vesca subsp. vesca]	-1.11772	0.000183661	0.000566556	yes	down		maker-Fvb2-2-snap-gene-173.21	beta-amyrin synthase [Rosa chinensis]	1.36469	1.61406e-24	2.07253e-23	yes	up
maker-Fvb3-2-augustus-gene-245.23	PREDICTED: uncharacterized protein LOC101303976 [Fragaria vesca subsp. vesca]	-2.00819	0.0161705	0.0347491	yes	down		maker-Fvb3-4-augustus-gene-275.41	hypothetical protein PRUPE_4G032500 [Prunus persica]	2.21667	8.02876e-16	6.7451e-15	yes	up
MSTRG.51996	PREDICTED: uncharacterized protein LOC101312994 [Fragaria vesca subsp. vesca]	-1.07679	3.36929e-06	1.30796e-05	yes	down		MSTRG.25742	PREDICTED: splicing factor, suppressor of white-apricot homolog isoform X1 [Fragaria vesca subsp. vesca]	1.09942	8.42616e-41	1.93606e-39	yes	up
maker-Fvb7-2-augustus-gene-286.41	PREDICTED: glutamate synthase 1 [NADH], chloroplastic isoform X1 [Fragaria vesca subsp. vesca]	-1.24697	4.32345e-64	1.79366e-62	yes	down		maker-Fvb2-3-augustus-gene-79.23	PREDICTED: uncharacterized protein LOC101310190 [Fragaria vesca subsp. vesca]	1.17828	0.0192769	0.0406767	yes	up
maker-Fvb1-4-augustus-gene-154.25	PREDICTED: NAC domain-containing protein 2-like [Fragaria vesca subsp. vesca]	-1.08348	3.01479e-48	8.53196e-47	yes	down		maker-Fvb7-1-augustus-gene-239.55	PREDICTED: putative serine/threonine-protein kinase [Fragaria vesca subsp. vesca]	4.92665	0.000123096	0.000389764	yes	up
maker-Fvb6-1-augustus-gene-67.58	PREDICTED: triacylglycerol lipase 2-like [Fragaria vesca subsp. vesca]	-1.26387	3.58461e-08	1.70793e-07	yes	down		maker-Fvb6-4-augustus-gene-319.35	PREDICTED: myb-related protein Myb4-like [Fragaria vesca subsp. vesca]	4.28247	2.25302e-08	1.09347e-07	yes	up
maker-Fvb1-3-augustus-gene-47.53	PREDICTED: 3-hydroxy-3-methylglutaryl-coenzyme A reductase 1-like [Fragaria vesca subsp. vesca]	-2.18234	5.02212e-05	0.000168257	yes	down		augustus_masked-Fvb6-4-processed-gene-140.11	PREDICTED: transcription repressor OFP6 [Fragaria vesca subsp. vesca]	1.91289	3.92552e-07	1.68843e-06	yes	up
maker-Fvb2-2-augustus-gene-3.48	PREDICTED: cysteine proteinase RD21a [Fragaria vesca subsp. vesca]	-1.03216	1.73536e-56	6.07581e-55	yes	down		maker-Fvb3-2-augustus-gene-98.54	PREDICTED: protein Jade-1-like [Fragaria vesca subsp. vesca]	1.2083	8.51862e-12	5.47985e-11	yes	up
maker-Fvb7-2-augustus-gene-182.47	PREDICTED: probable anion transporter 2, chloroplastic [Fragaria vesca subsp. vesca]	-1.6249	2.36085e-158	4.07394e-156	yes	down		MSTRG.44508	PREDICTED: G-type lectin S-receptor-like serine/threonine-protein kinase At4g03230 isoform X4 [Fragaria vesca subsp. vesca]	3.99641	8.4789e-24	1.0561e-22	yes	up
maker-Fvb6-1-augustus-gene-286.56	PREDICTED: endochitinase A-like [Fragaria vesca subsp. vesca]	-2.53142	3.02275e-120	3.22904e-118	yes	down		MSTRG.12046	PREDICTED: uncharacterized protein LOC101297958 [Fragaria vesca subsp. vesca]	1.623	0.00132851	0.00355694	yes	up
[truncated: 6,873 more rows]
