# Supplementary material for: Genome-wide characterization and expression of the TLP gene family associated with Colletotrichum gloeosporioides inoculation in Fragaria × ananassa
Source: PeerJ. 2022 Mar 24;10:e12979. doi: 10.7717/peerj.12979 (PMC8958966; doi:10.7717/peerj.12979)
Supplement: Supplemental Information 4 — Based on p-adjust < 0.05, and |log2FC| > 1. [file peerj-10-12979-s004.xlsx]

## Sheet: S4
Table S4. Differentially expressed genes of TLP
Gene name	Gene_id	log2(Kaorino-Infected/Uninfected)	pvalue	Padjust	Significant	regulated	Gene description
FaTLP40	maker-Fvb5-3-snap-gene-263.85	1.70119	1.51404e-108	1.15343e-106	yes	up	Pfam: Thaumatin family; Swissprot：Osmotin-like protein; Nr: thaumatin-like protein [Prunus persica]
FaTLP41	maker-Fvb5-4-snap-gene-9.57	1.02866	5.88055e-17	6.03451e-16	yes	up	Pfam: Thaumatin family; Swissprot：Osmotin-like protein; Nr: thaumatin-like protein [Prunus persica]
FaTLP43	maker-Fvb6-1-augustus-gene-240.28	-1.04523	6.24e-09		yes	down	Pfam: Thaumatin family; Swissprot：Thaumatin-like protein; Nr: thaumatin-like protein 1b [Fragaria vesca subsp. vesca]
FaTLP68	maker-Fvb7-4-snap-gene-48.50	2.33812	9.98326e-13	7.97508e-12	yes	up	Pfam: Thaumatin family; Swissprot：PR5-like receptor kinase
FaTLP75	snap_masked-Fvb6-2-processed-gene-166.24	-1.172	4.06e-18		yes	down	Pfam: Thaumatin family; Swissprot：Thaumatin-like protein; Nr: thaumatin-like protein, partial [Fragaria chiloensis]
Gene name	Gene_id	log2(Benihoppe-Infected/Uninfected)	pvalue	padj	Significant	regulated	Gene description
FaTLP43	maker-Fvb6-1-augustus-gene-240.28	-1.57137	0.00155298	0.00410851	yes	down	Pfam: Thaumatin family; Swissprot：Thaumatin-like protein; Nr: thaumatin-like protein 1b [Fragaria vesca subsp. vesca]
FaTLP62	maker-Fvb7-3-augustus-gene-64.54	1.55467	0.000914368	0.00252015	yes	up	Pfam: Thaumatin family; Swissprot：PR5-like receptor kinase
FaTLP68	maker-Fvb7-4-snap-gene-48.50	2.86647	3.71608e-15	2.99816e-14	yes	up	Pfam: Thaumatin family; Swissprot：PR5-like receptor kinase
