# Supplementary material for: Genome-wide characterization and expression of the TLP gene family associated with Colletotrichum gloeosporioides inoculation in Fragaria × ananassa
Source: PeerJ. 2022 Mar 24;10:e12979. doi: 10.7717/peerj.12979 (PMC8958966; doi:10.7717/peerj.12979)
Supplement: Supplemental Information 5 — The Actin gene was used as a reference gene. Each sample was repeated in triplicate. [file peerj-10-12979-s005.xlsx]

## Sheet: S5
Table S5. Primer sequences derived from RT-qPCR analysis
Gene symbol	Primer sequence(5'-3') (forward)	Primer sequence(5'-3') (reverse)
FaTLP1	GCTACGCTTATGATGATGC	AAGGAGACGACCACAATC
FaTLP2	CGTCAACACAATCACTAACA	CTTGGATGCGTCACTACTA
FaTLP3	TCCTCATCCTCTGCTCTC	GAGAAGCGGTTGTTGGAG
FaTLP4	GGATGCTTACACGACCTT	CTTGACACTGGAGGAGAC
FaTLP5	TGCTCCATCAACCATCAGT	CGTAGGCTTGGCACTCAA
FaTLP6	GGACTTGTCGGACCTCTA	CTTGTCATCATAAGCGTAGC
FaTLP7	CTGCTTCACGAACAATGC	CAGGTAGAGGTCCGACAA
FaTLP8	GGATGTGTCTCGGATATTAAC	GCATAACTGTAGCACTTGG
FaTLP9	GGATGTGTCTCGGATAATAAC	GCATAACTGTAGCACTTGG
FaTLP10	TCTTCATATTAGCGGTGGTAG	GCCTGATGCGGAGATAAG
FaTLP11	AAGGAAGAGACAACAAGAGA	ATAGCAGTAGCCAGTGAAG
FaTLP12	ACAGCTATGCCTATGATGAC	CTCCGAGTGATGCTTGAAT
FaTLP13	GCTACGCTTATGATGATGC	GTGGCTACTACTCTACTACAA
FaTLP14	CTCTGTCTCGTTCACTTCAT	AGCCGCAATCTCCAGTAA
FaTLP15	GCTACGCTTATGATGATGC	GTGGCTACTACTCTACTACG
FaTLP16	CGTACAGCTATGCCTATGA	CTCCGAGTGATGCTTGAA
FaTLP17	GCTACGCTTATGATGATGC	GTGGCTACTACTCTACTACAA
FaTLP18	CTCGTACTCGCAGTTCTT	TGATGCTTGAATGGTGTGA
FaTLP19	TGCTTCTGGTTGTGATGG	GGTTGCTTCCTGGATGAG
FaTLP20	GCGACTTGAACACCAACT	TCCTCTTCCTCTTAGCTCAT
FaTLP21	ACGATGACGCTACGAGTA	TGTCCTTGGTGAGTCTCC
FaTLP22	ACTTATGAGCAGCCAACAA	GCAGAGCAAAGAGGTAGATA
FaTLP23	CGATTACACCATCACCTTCT	CGGAACCAGCCATATAACA
FaTLP24	AGTGAATCATCGTACCAAGT	GGTGAGGCAGGAGAAGTT
FaTLP25	ACACCAATGACAGGAGGA	GGGCTACAAGTAAAGATAGGA
FaTLP26	TGCTTCTGGTTGTGATGG	GGTTGCTTCCTGGATGAG
FaTLP27	TGCTTCTGGTTGTGATGG	GGTTGCTTCCTGGATGAG
FaTLP28	TTGTTGTAGTGAGGCGTAC	TTGTTGGCTGCTCATAAGTA
FaTLP29	TCTTCTGGTGAGGCAATG	GGTGTACGATCTTGATGGA
FaTLP30	CGAGTTCACCGTAGGATC	TTGAGTCGGAGAGCAAGT
FaTLP31	AATAACCTTGTAGCCGTGAA	TGATGTGAATAGAGCGAGAA
FaTLP32	CGATTACACCATCACCTTCT	CGGAACCAGCCATATAACA
FaTLP33	TGTCCTAGTGAGTTACAGTTC	GTTGGTGGTGTTAGTGATTG
FaTLP34	AACTTCAATGGTGGTGGTT	ACAGGTGTGATAGTCAATGG
FaTLP35	CTTCACTCACACCAGGTAT	TGACTATGGAGGCAGAGA
FaTLP36	TCCTCTTGTAATTGCTCGTA	CTGGTGCTAGTGCTTCAA
FaTLP37	CAACGAGCAGGACTTCTA	CACGCCGTCTTGAATATC
FaTLP38	CCTCCTCTTGTAATTGCTCAT	TGCTGGCTAGTGCTTCAA
FaTLP39	GGACCTAATAATAAGCCAGAGA	CGGTGTCGTATTCCATAAGA
FaTLP40	GGTTCAATGTGGCTATGGA	CAGTGCTGGTTGTATCGT
FaTLP41	CGGTGGATGTAACAATGC	TGGAGGAGATGAAGAAGAAG
FaTLP42	AACTGCTTCACGGACAAC	GCTCACTCGGACACATAG
FaTLP43	GCTACGCTTACGATGACA	AACGAATCTGATTGCTAACC
FaTLP44	AGCACCTCTCCTATTCTCA	ACTTCCTCACCACTTCCA
FaTLP45	GCTTGGTTGATGGATACAAT	TGGAGGTGGTGAATCATAAG
FaTLP46	AACTGCTTCACGAACAATG	GTAGTTCACTCGGACAATTAG
FaTLP47	AGCGTGGTTGATGGATAC	GGAGATGGTGAATCATAAGC
FaTLP48	TGGAATAGGTTGTGGTGTT	CTGTTAAGGCTTGAAGAGTC
FaTLP49	GCTTGGTTGATGGATACAAT	TGGAGGTGGTGAATCATAAG
FaTLP50	GCGTGGTTGATGGATACA	TGGAGGTGGTGAATCATAAG
FaTLP51	CAGGTCATCACTCCAGTTC	GTAGAGGGTTGGCAATCG
FaTLP52	CTAACTGCTTCACGGACAA	GCTCACTCGGACACATAG
FaTLP53	TGGAATAGGTTGTGGTGTT	CTGTTAAGGCTTGAAGAGTC
FaTLP54	CCACTTGCCTTAGTCATCA	CAGTTAGCGACAACAATACA
FaTLP55	CCAGAGGTTGATGAGAGTG	AATCGGAGCAATGTTCTACT
FaTLP56	GTTCTTCACTGCGATTATGG	TCTTGTTGTCTCTTCCTTGT
FaTLP57	AACTGGTCTGGAAGAATCTG	TTCAAGTCAGCCTCACAAG
FaTLP58	GCAGAACAGCGATAATAACA	ATCATCACACTCATCAACCT
FaTLP59	TCAAGTTGCTGTCAAGTTAC	CATTGTGTAGATAATCCAGTCC
FaTLP60	AACTGGTCTGGAAGAATCTG	TTCAAGTCAGCCTCACAAG
FaTLP61	ATGATGGCACAAGCACTT	ATTCTCCTGTTGGCACTC
FaTLP62	TGATGACAACCAGACTACG	TCCTCCAACTCCAATGAAC
FaTLP63	AACTGGTCTGGAAGAATCTG	TTCAAGTCAGCCTCACAAG
FaTLP64	GGCAGAACAGCAATAATAAC	CCATCACTCTCATCAACCT
FaTLP65	AATTCCGCCGCTAATCTT	TTCTTCTCCGTTGCTTGG
FaTLP66	TGGTGTCTTCTTCGTATGC	ACAGAGGACTTGTGAGATTG
FaTLP67	AACTGGTCTGGAAGAATCTG	TTCAAGTCAGCCTCACAAG
FaTLP68	GTAGAAGGAAGAGACAACAAG	CATAGCAGTAGCCAGTGAA
FaTLP69	AACCAACGCCAGTAACAA	CGGTAGATATGTATCGTATAGC
FaTLP70	AACGACTTGTGGTCTTACG	CTTGAAGAACTGCGAGAATC
FaTLP71	AATTCCACCTGCGTCACT	TACTGAGGCTGATTGAACAC
FaTLP72	GATATTAGCCTCGTTGATGG	GCACTGGTTCTTGAAGAC
FaTLP73	CCTCTTCTTCTTCATCTCCT	TGTTGCCGAATTGGTTAAG
FaTLP74	CTAACTGCTTCACGGACAA	GCTCACTCGGACACATAG
FaTLP75	GCTACGCTTACGATGACA	AACGAATCTGATTGCTAACC
FaTLP76	GTAGAAGGAAGAGACAACAAG	CATAGCAGTAGCCAGTGAA
Actin	GCTAATCGTGAGAAGATGAC	AGCACAATACCAGTAGTACG
