# Supplementary material for: Genome-wide characterization and expression of the TLP gene family associated with Colletotrichum gloeosporioides inoculation in Fragaria × ananassa
Source: PeerJ. 2022 Mar 24;10:e12979. doi: 10.7717/peerj.12979 (PMC8958966; doi:10.7717/peerj.12979)
Supplement: Supplemental Information 9 [file peerj-10-12979-s009.xlsx]

## Sheet: Raw data for qRT-PCR
Supplemental File. Raw data for qRT-PCR
		0hpi			2hpi			6hpi			12hpi			24hpi			48hpi			72hpi			4dpi			5dpi			6dpi			7dpi
Sample	Gene Name	Cq	∆Ct（Cq-mean of CqActin）	2-∆Ct	Cq	∆Ct（Cq-mean of CqActin）	2-∆Ct	Cq	∆Ct（Cq-mean of CqActin）	2-∆Ct	Cq	∆Ct（Cq-mean of CqActin）	2-∆Ct	Cq	∆Ct（Cq-mean of CqActin）	2-∆Ct	Cq	∆Ct（Cq-mean of CqActin）	2-∆Ct	Cq	∆Ct（Cq-mean of CqActin）	2-∆Ct	Cq	∆Ct（Cq-mean of CqActin）	2-∆Ct	Cq	∆Ct（Cq-mean of CqActin）	2-∆Ct	Cq	∆Ct（Cq-mean of CqActin）	2-∆Ct	Cq	∆Ct（Cq-mean of CqActin）	2-∆Ct
Kaorino	T40	25.74	-0.525	1.43893	22.24	-1.49333	2.81539	22.72	-3.13667	8.7949	23.45	-2.88667	7.3956	20.95	-3.92667	15.207	22.36	-2.65	6.27667	23.21	-1.81	3.50642	21.61	-3.91667	15.102	22.79	-1.59667	3.02444	23.01	-1.28	2.42839	24.58	-1.33667	2.52567
Kaorino	T40	26.02	-0.245	1.18509	22.15	-1.58333	2.99661	22.73	-3.12667	8.73415	23.24	-3.09667	8.5544	20.67	-4.20667	18.4643	22.37	-2.64	6.23332	22.9	-2.12	4.34694	21.66	-3.86667	14.5876	22.49	-1.89667	3.72352	22.83	-1.46	2.75108	24.57	-1.34667	2.54324
Kaorino	T40	26.08	-0.185	1.13682	22.19	-1.54333	2.91467	22.76	-3.09667	8.5544	23.28	-3.05667	8.32048	20.83	-4.04667	16.526	22.66	-2.35	5.09824	22.92	-2.1	4.28709	21.7	-3.82667	14.1887	22.29	-2.09667	4.2772	22.83	-1.46	2.75108	24.46	-1.45667	2.74473
Kaorino	T41	34.21	7.945	0.00405804	31.9	8.16667	0.00348007	34.44	8.58333	0.00260711	32.41	6.07333	0.0148506	27.96	3.08333	0.117984	29.42	4.41	0.047039	30.46	5.44	0.0230355	30.38	4.85333	0.034594	31.84	7.45333	0.00570589	32.87	8.58	0.00261314	33.53	7.61333	0.00510691
Kaorino	T41	33.47	7.205	0.00677765	30.8	7.06667	0.0074597	33.9	8.04333	0.00379066	32.51	6.17333	0.0138561	27.45	2.57333	0.168016	30.31	5.3	0.0253829	30.8	5.78	0.018199	29.42	3.89333	0.0672961	31.82	7.43333	0.00578554	32.03	7.74	0.00467765	33.41	7.49333	0.00554986
Kaorino	T41	34.04	7.775	0.00456554	31.52	7.78667	0.00452876	34.11	8.25333	0.00327717	33	6.66333	0.0098659	28	3.12333	0.114758	31.34	6.33	0.0124303	30.92	5.9	0.0167465	29.89	4.36333	0.0485854	29.29	4.90333	0.0334156	32.33	8.04	0.00379943	31.79	5.87333	0.0170589
Kaorino	T43	26.46	0.195	0.873573	24.38	0.646667	0.638754	26.04	0.183333	0.880666	23.41	-2.92667	7.60352	25.9	1.02333	0.491978	24.43	-0.58	1.49485	25.28	0.26	0.835088	25.89	0.363333	0.777366	25.01	0.623333	0.649169	28.65	4.36	0.0486978	26.46	0.543333	0.686184
Kaorino	T43	26.56	0.295	0.815072	25.39	1.65667	0.317171	26.39	0.533333	0.690956	23.66	-2.67667	6.39377	26.7	1.82333	0.282567	23.82	-1.19	2.28153	23.81	-1.21	2.31338	24.37	-1.15667	2.22942	24.77	0.383333	0.766664	25.45	1.16	0.447513	26.48	0.563333	0.676737
Kaorino	T43	26.48	0.215	0.861546	23.64	-0.0933333	1.06683	26.89	1.03333	0.48858	23.62	-2.71667	6.57352	25.78	0.903333	0.53465	24.39	-0.62	1.53688	24.42	-0.6	1.51572	24.45	-1.07667	2.10916	26.72	2.33333	0.198425	24.57	0.28	0.823591	28.21	2.29333	0.204004
Kaorino	T62	31.96	5.695	0.0193034	28.45	4.71667	0.0380314	34.52	8.66333	0.00246648	29.36	3.02333	0.122995	35.96	11.0833	0.000460876	28.51	3.5	0.0883883	32.53	7.51	0.00548611	34.67	9.14333	0.00176841	27.95	3.56333	0.0845921	27.15	2.86	0.137738	29.62	3.70333	0.0767689
Kaorino	T62	32.64	6.375	0.0120485	28.86	5.12667	0.0286233	35.56	9.70333	0.00119951	30.07	3.73333	0.0751891	35.43	10.5533	0.000665473	26.7	1.69	0.309927	29.89	4.87	0.0341967	34.17	8.64333	0.00250091	30.57	6.18333	0.0137604	26.82	2.53	0.173139	30.66	4.74333	0.0373348
Kaorino	T62	31.75	5.485	0.022328	28.18	4.44667	0.0458585	32.46	6.60333	0.0102849	29.79	3.45333	0.0912942	34.6	9.72333	0.001183	30.44	5.43	0.0231957	29.66	4.64	0.0401071	35.17	9.64333	0.00125045	30.35	5.96333	0.0160272	28.45	4.16	0.0559391	31.89	5.97333	0.0159165
Kaorino	T68	25.52	-0.745	1.67597	21.68	-2.05333	4.15064	23.09	-2.76667	6.80534	20.6	-5.73667	53.3223	20.73	-4.14667	17.7121	21.23	-3.78	13.737	22.32	-2.7	6.49802	23.43	-2.09667	4.2772	21.69	-2.69667	6.48302	21.36	-2.93	7.6211	23.06	-2.85667	7.2434
Kaorino	T68	26.2	-0.065	1.04608	21.58	-2.15333	4.44854	23.28	-2.57667	5.9656	20.38	-5.95667	62.1063	20.93	-3.94667	15.4193	21.5	-3.51	11.3924	22.49	-2.53	5.77572	23.51	-2.01667	4.04648	21.86	-2.52667	5.76239	21.2	-3.09	8.51496	23.08	-2.83667	7.14368
Kaorino	T68	25.94	-0.325	1.25266	21.61	-2.12333	4.35699	23.29	-2.56667	5.92439	21.27	-5.06667	33.5134	20.88	-3.99667	15.9631	21.54	-3.47	11.0809	22.57	-2.45	5.46416	23.09	-2.43667	5.41389	21.94	-2.44667	5.45155	21.5	-2.79	6.9163	22.93	-2.98667	7.9264
Kaorino	T75	28.53	2.265	0.20805	26.1	2.36667	0.193893	26.63	0.773333	0.585064	26.47	0.133333	0.911722	28.49	3.61333	0.0817106	23.52	-1.49	2.80889	26.52	1.5	0.353553	27.19	1.66333	0.315709	25.89	1.50333	0.352737	24.32	0.03	0.97942	26.83	0.913333	0.530957
Kaorino	T75	26.36	0.095	0.936272	26.95	3.21667	0.107569	27.23	1.37333	0.385998	26.91	0.573333	0.672062	26.19	1.31333	0.40239	23.53	-1.48	2.78949	25.59	0.57	0.673617	26.44	0.913333	0.530957	25.04	0.653333	0.63581	26.12	1.83	0.281265	26.74	0.823333	0.565135
Kaorino	T75	26.87	0.605	0.657471	25.71	1.97667	0.254076	28.54	2.68333	0.155681	27.21	0.873333	0.545884	26.61	1.73333	0.300756	23.74	-1.27	2.41162	26.34	1.32	0.400535	27.73	2.20333	0.217135	25.65	1.26333	0.41658	24.67	0.38	0.768438	26.61	0.693333	0.618423
Kaorino	actin	26.11			23.37			25.87			26.61			24.82			24.81			24.97			25.72			24.49			23.97			25.99
Kaorino	actin	26.42			24.1			25.69			26.24			24.95			24.9			25.15			24.81			24.31			24.38			26.39
Kaorino	actin				23.73			26.01			26.16			24.86			25.32			24.94			26.05			24.36			24.52			25.37
		0hpi			2hpi			6hpi			12hpi			24hpi			48hpi			72hpi			4dpi			5dpi			6dpi			7dpi
Sample	Gene Name	Cq	∆Ct（Cq-mean of CqActin）	2-∆Ct	Cq	∆Ct（Cq-mean of CqActin）	2-∆Ct	Cq	∆Ct（Cq-mean of CqActin）	2-∆Ct	Cq	∆Ct（Cq-mean of CqActin）	2-∆Ct	Cq	∆Ct（Cq-mean of CqActin）	2-∆Ct	Cq	∆Ct（Cq-mean of CqActin）	2-∆Ct	Cq	∆Ct（Cq-mean of CqActin）	2-∆Ct	Cq	∆Ct（Cq-mean of CqActin）	2-∆Ct	Cq	∆Ct（Cq-mean of CqActin）	2-∆Ct	Cq	∆Ct（Cq-mean of CqActin）	2-∆Ct	Cq	∆Ct（Cq-mean of CqActin）	2-∆Ct
Benihoper	T40	25.72	0.173333	0.886791	23.21	-1.9	3.73213	23.65	-2.08	4.22807	23.09	-2.07333	4.20858	24.2	-2.60333	6.07689	21.54	-4.07667	16.8733	24.57	-3.08	8.45614	22.14	-4.87	29.2426	22.2	-3.345	10.1612	21.59	-2.49667	5.6438	26.95	-2.42667	5.3765
Benihoper	T40	25.89	0.343333	0.788218	23.14	-1.97	3.91768	23.33	-2.4	5.27803	22.79	-2.37333	5.18137	23.85	-2.95333	7.74537	21.55	-4.06667	16.7567	23.93	-3.72	13.1775	22.14	-4.87	29.2426	22.32	-3.225	9.35022	21.6	-2.48667	5.60481	27.03	-2.34667	5.08648
Benihoper	T40	25.69	0.143333	0.905425	23.21	-1.9	3.73213	23.72	-2.01	4.02782	22.72	-2.44333	5.43897	23.74	-3.06333	8.35902	21.55	-4.06667	16.7567	24.19	-3.46	11.0043	22.18	-4.83	28.443	22.36	-3.185	9.09454	21.69	-2.39667	5.26585	26.88	-2.49667	5.6438
Benihoper	T41	33.88	8.33333	0.00310039	32.91	7.8	0.0044871	40.45	14.72	3.70543e-05	32.75	7.58667	0.00520218	32.49	5.68667	0.0194152	28.6	2.98333	0.126452	32.39	4.74	0.0374212	32.53	5.52	0.0217929	34.37	8.825	0.00220501	33.38	9.29333	0.00159378	38.3	8.92333	0.00205972
Benihoper	T41	33.39	7.84333	0.00435433	33.82	8.71	0.00238797	36.9	11.17	0.000434005	33.11	7.94667	0.00405336	32.68	5.87667	0.0170195	29.43	3.81333	0.0711332	34.98	7.33	0.00621513	30.75	3.74	0.0748424	34.47	8.925	0.00205735	33.51	9.42333	0.00145644	38.02	8.64333	0.00250091
Benihoper	T41	33.46	7.91333	0.0041481	33.59	8.48	0.00280069	38.04	12.31	0.000196934	32.79	7.62667	0.00505993	33.57	6.76667	0.00918397	29.92	4.30333	0.0506486	34.82	7.17	0.00694408	31.66	4.65	0.03983	34.33	8.785	0.002267	33.06	8.97333	0.00198956	37.95	8.57333	0.00262524
Benihoper	T43	25.98	0.433333	0.740549	25.63	0.52	0.697372	26.02	0.29	0.817902	25.01	-0.153333	1.11214	28.75	1.94667	0.259415	27.51	1.89333	0.269184	27	-0.65	1.56917	24.3	-2.71	6.54322	26.61	1.065	0.477973	25.72	1.63333	0.322343	30.61	1.23333	0.425334
Benihoper	T43	25.99	0.443333	0.735433	25.71	0.6	0.659754	28.63	2.9	0.133972	25.25	0.0866667	0.941696	26.67	-0.133333	1.09682	25.82	0.203333	0.868541	27.9	0.25	0.840896	24.21	-2.8	6.9644	26.49	0.945	0.51943	27.01	2.92333	0.131822	30.63	1.25333	0.419478
Benihoper	T43	26.22	0.673333	0.627056	25.54	0.43	0.742262	26.24	0.51	0.702222	24.97	-0.193333	1.1434	28.48	1.67667	0.312805	28.06	2.44333	0.183858	26.79	-0.86	1.81504	24.16	-2.85	7.21	27.03	1.485	0.357249	25.97	1.88333	0.271057	31.06	1.68333	0.311362
Benihoper	T62	32.64	7.09333	0.00732308	29.34	4.23	0.0532897	38.25	12.52	0.000170257	35.52	10.3567	0.000762663	24.78	-2.02333	4.06522	33.83	8.21333	0.0033693	36.35	8.7	0.00240458	32.25	5.24	0.0264608	34.3	8.755	0.00231463	32.93	8.84333	0.00217717	37.56	8.18333	0.0034401
Benihoper	T62	32.3	6.75333	0.00926924	29.94	4.83	0.0351581	38.43	12.7	0.000150286	38.12	12.9567	0.000125792	24.79	-2.01333	4.03714	34.13	8.51333	0.00273673	35.81	8.16	0.00349619	31.36	4.35	0.0490365	33.82	8.275	0.00322832	33.37	9.28333	0.00160486	37.16	7.78333	0.00453924
Benihoper	T62	32.9	7.35333	0.00611542	31.87	6.76	0.00922651	38.02	12.29	0.000199683	36.84	11.6767	0.000305473	23.83	-2.97333	7.85349	33.96	8.34333	0.00307898	34.91	7.26	0.00652412	27.18	0.17	0.888843	33.28	7.735	0.00469389	34.88	10.7933	0.000563486	38.16	8.78333	0.00226962
Benihoper	T68	24.77	-0.776667	1.71317	22.37	-2.74	6.6807	22.43	-3.3	9.84916	21.47	-3.69333	12.9361	22.48	-4.32333	20.0195	22.26	-3.35667	10.2437	23.39	-4.26	19.1597	23.24	-3.77	13.6422	23.44	-2.105	4.30198	22.07	-2.01667	4.04648	27.04	-2.33667	5.05134
Benihoper	T68	24.72	-0.826667	1.77358	22.52	-2.59	6.02099	22.72	-3.01	8.05564	21.27	-3.89333	14.8597	21.98	-4.82333	28.3118	22.06	-3.55667	11.7669	23.98	-3.67	12.7286	22.6	-4.41	21.259	23.53	-2.015	4.04181	21.38	-2.70667	6.52812	26.89	-2.48667	5.60481
Benihoper	T68	24.83	-0.716667	1.64338	22.36	-2.75	6.72717	22.62	-3.11	8.63383	21.34	-3.82333	14.1559	21.97	-4.83333	28.5088	21.77	-3.84667	14.3867	23.6	-4.05	16.5642	23.48	-3.53	11.5514	22.86	-2.685	6.43081	21.16	-2.92667	7.60352	26.57	-2.80667	6.99666
Benihoper	T75	26.91	1.36333	0.388683	28.23	3.12	0.115023	26.84	1.11	0.463294	25.49	0.326667	0.797377	28.06	1.25667	0.41851	26.78	1.16333	0.44648	29.23	1.58	0.334482	24.71	-2.3	4.92458	25.97	0.425	0.744839	26.17	2.08333	0.235969	30.52	1.14333	0.452712
Benihoper	T75	26.86	1.31333	0.40239	26.72	1.61	0.327598	28.92	3.19	0.109576	25.7	0.536667	0.689362	27.94	1.13667	0.454809	26.62	1.00333	0.498846	28.64	0.99	0.503478	25.25	-1.76	3.38698	26.56	1.015	0.494828	26.32	2.23333	0.212667	30.38	1.00333	0.498846
Benihoper	T75	28.44	2.89333	0.134592	26.39	1.28	0.411796	29.02	3.29	0.102238	26.88	1.71667	0.304251	27.86	1.05667	0.480742	28	2.38333	0.191666	28.01	0.36	0.779165	26.24	-0.77	1.70527	26.3	0.755	0.592546	27.45	3.36333	0.0971708	30.26	0.883333	0.542113
Benihoper	actin	25.48			24.41			25.81			24.85			26.94			26.6			-			28.27			25.3			23.99			29.7
Benihoper	actin	25.31			25.14			25.84			25.4			26.78			26.15			29.21			26.26			25.79			24.05			29.03
Benihoper	actin	25.85			25.78			25.54			25.24			26.69			24.1			26.09			26.5						24.22			29.4
